# Supplementary material for: Conformational dynamics of auto-inhibition in the ER calcium sensor STIM1
Source: eLife. 2021 Nov 3;10:e66194. doi: 10.7554/eLife.66194 (PMC8651296; doi:10.7554/eLife.66194)
Supplement: Figure 1—figure supplement 1—source data 1. [file elife-66194-fig1-figsupp1-data1.xlsx]

## Sheet: 363-363_inter_liposome
1	donor	82814.4	92266.3	87722.8	74766.2	88234.7	62910.7	80405.5	86707	92786.9	91329.6	77243.7	97589.8	88580.3	82562.9	109672	76147.9	83877.7	99172.9	96927.6	86542.6	106795	98237.1	89144.1	96597.8	90930.3	107100	108671	106801	86991.1	108213	102180	90526.7	111189	96422.8	93108.8	107680	94999.7	100001	96530.1	96826.4	80372.9	58912.5	4223.2	-3806.54	-6505.7	2981.36	-4550.59	-5311.35
1	acceptor	10732.9	20302.5	8601.49	18227.6	14148.1	17181.4	12217	15764.8	5237.02	13930.4	4149.42	8565.41	10649.7	8125.67	7336.38	15242.6	8638.98	11947.5	9507.71	9676.62	3025.86	-808.457	1912.1	1018.43	1721.54	-2845.02	2687.95	-8.897	-4046.91	4785.4	-3270.93	1158	-4135.37	760.787	-3546.76	4604.52	3024.7	-718.125	-1192.07	-2596.95	964.49	-3377.24	931.642	-899.102	2577.66	-884.665	-568.528	-3657.91
1	fret	0.114957	0.180305	0.089191	0.196168	0.13804	0.21468	0.131672	0.153811	0.053373	0.132382	0.0508351	0.0805751	0.107411	0.089858	0.0629751	0.166949	0.093206	0.107411
2	donor	6692.39	12426.3	11805.2	1387.3	17529.6	6941.22	49327.5	90207.8	85634.2	85531.9	94801.8	42365.8	7795.41	2259.21	-9.53261	309.51	-319.712	-7935.14	6813.06	-1644.96	1298.68	-879.399	1503.87	-2792.29	-1814.03	8949.55	-848.722	-2788.2	-1940.83	1756.11	4491.14	-4096.41	-1541.34	-956.433	1399.57	-9638.06	-5358.26	-2780.7	-7737.44	-8097.38	-697.382	3883.05	3201.34	-1810.62	19687.9	13426.4	-6680.78	-2899.32
2	acceptor	79578.3	78217	83615.6	73579	81216.9	77176.6	51310.4	-2519.16	3853.59	-1904.73	-1761.22	2361.59	-1898.98	-2924.91	2587.39	-1810.21	-117.44	2215.07	-4730.27	889.748	5323.32	-1012.27	2047.88	-294.865	2227.14	-4791.13	-3071.37	3818.85	-4702.06	-5619.55	-1406.83	1208.87	1161.38	638.501	5833.65	-1068.12	-3176.22	-2534.95	-1839.37	-2674.31	333.324	4118.05	5850.1	2010.52	2778.85	684.33	3305.61	1820.7
2	fret	0.921966	0.8629	0.876567	0.98152	0.822463	0.91687
3	donor	58281.9	61445.3	52580.2	29466.9	33587.6	31960.5	26397.1	31639.1	45873.7	47781.5	48812	44616.8	56248	53907.6	45034.4	51427.6	60246.6	59233.7	45014.1	48349.7	59239.2	50837.8	55833.1	46931.3	72559.9	52363.2	44056.8	50595.1	48966.6	59153.7	52041.9	53502.2	54212.7	52380.9	56357.8	56930	51944.2	60390.4	53613.4	67362.6	55019.5	57744.9	61369.3	68837.8	65865.6	59584.9	58974.8	59690.7
3	acceptor	46011.5	38524.2	30964.7	64865.6	72749.8	77277.7	73977.3	75638.6	47842.6	36188.6	42633.2	35725.6	30496.5	46383.9	39566.6	42002.3	47928	37705	47163.4	39937.8	42941.1	39122.4	32549.1	37693	38770.5	41081.8	39348.7	35211.6	47278.7	44219.9	40310.8	39426.7	41326.3	46747.3	40602.6	46936	45870.9	47822.2	41379.4	44012.8	36308.7	43884.8	48077.7	42870.7	31759.8	43721.8	43944.1	45342.2
3	fret	0.440949	0.385361	0.37094	0.687455	0.684194	0.707106	0.736864	0.704915	0.510977	0.431105	0.465733	0.444898	0.351845	0.462745	0.467726	0.449843	0.442923	0.389221	0.511992	0.452814	0.420322	0.435038	0.368066	0.445886	0.348044	0.439963	0.471718	0.41056	0.490767	0.42816	0.436022	0.424238	0.432088	0.471718	0.418367	0.451823	0.468723	0.441936	0.436022	0.395022	0.397928	0.432088	0.438977	0.383433	0.325362	0.423258	0.427179	0.432088
4	donor	25751.5	37699.7	35594.4	38983.5	21067.2	23389.1	44394.6	25830.8	34104.7	36312.2	24458.5	34319.8	45885.9	24765.2	23405.9	33897.2	26086.3	35943.8	25391.4	35049.8	28498.2	48126.9	35226	26114.5	32467.8	32814.1	28287.7	35527.3	22791.9	33930.8	26823.9	30326.6	43997.2	38635.6	32176.4	31548.6	32981.9	31632.5	27942.9	33496	25490.6	35183.3	36949.9	42913.3	52782.9	31314.4	25061.1	26933
4	acceptor	83163.9	71905.4	70351.1	70826.2	75707.9	68209.7	74989.6	81096.6	77922.3	77419.7	82735.2	85198.2	71842.1	81520	78714.9	79241.6	87530.1	75436.7	80211.5	74313.6	84166.2	63369.1	81436.9	79896.4	70916.5	79137.6	85789.5	77633.1	83467.5	89422.7	80475.1	85056.6	86330.1	75871.3	73266.8	80692.1	76631.8	84288.3	81565.7	80160.6	76939.7	83303.3	74143.2	71060.9	66913.4	79267.7	80978.9	79646.9
4	fret	0.763172	0.65593	0.663855	0.644674	0.782567	0.745238	0.627933	0.758391	0.695937	0.680965	0.771645	0.71338	0.610262	0.766787	0.770436	0.700571	0.770436	0.677529	0.759565	0.679819	0.747622	0.567973	0.698252	0.753596	0.685558	0.706381	0.7524	0.685558	0.785003	0.72511	0.750009	0.736921	0.662721	0.662721	0.694781	0.719234	0.699411	0.727465	0.745238	0.705217	0.751204	0.702892	0.667263	0.623476	0.559434	0.71689	0.763172	0.747622
5	donor	6026.11	10663.1	-3478.53	13121	8592.13	11790.5	13768	5320.71	1599.47	7821.01	8203.65	14553.7	8024.01	1170.1	9748.81	1777.65	9329.66	2018.62	76.2166	10869	7379.95	4374.33	8608.19	9582.32	951.03	7356.58	8806.81	11486.7	5903.43	4742.37	14067.4	61783.3	55182.1	51531	51843.5	63046.6	43108.5	62605.6	59138.5	65479.8	62813	70978.4	60314.1	74758	71880.9	71675	64149.3	42279
5	acceptor	53973.7	53002.2	54989.5	47654.7	51188.2	46963.9	52299.6	47997.4	54605.9	49115.2	51825.9	62602.5	48265.1	54058.8	49095.2	61423.1	58518.1	55179.2	54479	53102.4	52952.6	56527.5	53277.3	54447.7	60045.2	53722.6	59368.6	57361	53224.4	62984.7	46069.4	-393.131	-709.868	-1903.12	-362.116	-4687.32	2115.5	2301.56	-1118.15	-860.635	1707.45	-1232.21	-3489.22	-1220.21	-1306.96	-5129.68	-2972.9	-4529.44
5	fret	0.899931	0.832387	1.06778	0.784099	0.856252	0.799744	0.791919	0.899931	0.971407	0.863106	0.863106	0.810959	0.857393	0.97853	0.834651	0.971407	0.861963	0.964301	0.998803	0.830124	0.878011	0.92785	0.86082	0.850552	0.984479	0.879161	0.871123	0.833519	0.899931	0.930188
6	donor	4050.29	5689.04	15228.7	5750.6	6802.06	20098.4	7168.07	8465.76	-7286.17	9585.43	15687.9	8169.62	17463.1	15989	1588.01	5738.95	1671.2	12205.8	7507.47	61225.1	69893	58907.6	64168.2	66064.8	67216.1	57049.2	54062.9	59676.2	52289.4	68229.3	63600.9	72125.7	67141.2	70478.6	75391.5	60737.6	73682.9	61674.3	54171	46343.3	52279.4	58376.8	65632.2	68926.4	58841	60584.6	56102.6	49700.6
6	acceptor	55072.3	57069.6	55572.2	52837.8	54887.9	58381.4	60063.8	60624	56402.4	58929.8	51604	55443.3	48575.5	53749.3	56397.7	66302.5	61133.1	56369.8	62607.9	7989.44	-493.376	2.441	-2599.72	-3370.64	-3240.99	6251.58	637.653	3055.77	-5406.37	-1470.64	5487.05	-385.78	-3568.84	3761.49	-4773.03	94.103	281.328	1099.75	6206.23	4660.17	-838.536	-1234.2	242.361	-1842.57	-6454.85	955.507	2129.31	4453.06
6	fret	0.932003	0.909689	0.784925	0.901511	0.889869	0.743819	0.893357	0.877117	1.14853	0.85982	0.767084	0.87134	0.736106	0.770423	0.972371	0.920237	0.973566	0.822132	0.893357
7	donor	8179.42	10306.6	22413.6	9804.76	9534.69	17490.5	13542.5	30847.7	36331.6	89643.7	6202.5	-6215.86	2241.79	-7045.72	-7374.71	-4095.56	-1656.08	-636.683	3452.69	-8405.89	3654.99	-1937.93	-4426.52	-4114.22	10049.3	-2178.54	5140.88	-2005.7	-2646.99	7544.02	417.086	280.578	-815.421	1205.69	-4598.38	574.219	917.946	7022.54	2597.3	-127.966	-1596.17	5097.66	-1888.83	-6212.91	-3353.11	14317.4	-763.37	15175.7
7	acceptor	83786.6	69142	79106	81919.3	82232.7	74844.8	72221.2	82756.3	69281.3	5209.64	2423.92	876.36	-1930.5	3615.42	1312.21	-4967.15	-29.224	2995.04	1057.38	-564.652	612.487	-679.088	943.353	-2186.12	-470.131	-1776.8	-2144.07	-1040.78	2655.88	-770.528	-2614.38	-352.25	-3813.63	-3083.98	-2364.95	-3517.47	-1694.88	3267.08	1551.01	-4184.36	-2889.32	-2309.44	920.547	474.762	-2233.36	4897.8	-460.52	-5050.59
7	fret	0.9111	0.870663	0.778835	0.892833	0.895628	0.8101	0.842078	0.728249	0.655742
8	donor	18091.1	16120.6	8743.78	12881.9	7428.61	8986.49	10972.1	8874.24	12152.3	7151.01	16888.1	7795.71	11723	9138.18	18185.1	13707.2	7842.73	9628.15	8068.75	21695.3	11195.1	17702.7	13758.7	4924.17	14324.5	10530.7	6653.46	8775.64	19459.3	13473.5	9421.85	11712.4	12193.3	21188.6	6753.58	13526.6	5879.83	8411.58	16642.4	18964.8	14062.1	9402.13	11287.7	6092.2	12238.8	2447.04	10468.5	12349.5
8	acceptor	58992.2	67318.9	68570.4	56229.1	66945.2	63432.5	66884.2	64630.9	69844.5	67066	69588.9	70898.3	64136.8	64486.3	67008	70587.4	61328.6	68481.2	73395.4	67859.7	67697.9	63061.8	69362.1	70602.5	74656	61302.4	70009.3	70097.7	66801.2	63342.6	59212.4	64864.7	60989.4	67076	79390.2	61901.4	71321.6	67065.8	73914.5	64915.2	72323	76058.7	72924	82230.7	77100.6	72302.8	73468.7	68780.8
8	fret	0.764712	0.806525	0.886799	0.814008	0.899896	0.876394	0.859618	0.878989	0.851931	0.903844	0.805281	0.901211	0.845551	0.876394	0.786731	0.837927	0.886799	0.876394	0.901211	0.757446	0.858334	0.780593	0.834128	0.934418	0.839195	0.85321	0.913092	0.888105	0.774478	0.824038	0.862188	0.846825	0.832863	0.759865	0.921059	0.82027	0.923722	0.888105	0.81651	0.774478	0.83666	0.889411	0.866051	0.930399	0.863475	0.966903	0.875097	0.8481
9	donor	10708.8	10109.5	16018.6	5372.53	7063.29	11322.5	12181.7	8695.97	9024.61	3075.95	11672.3	7444.73	13298.4	10995.2	4436.74	11070.4	17296.2	11282.9	5880.68	11457.1	11038.7	6776.87	10410.5	11156.2	3735.89	3186.82	6840.23	4319.27	9264.83	22426.6	76038.4	76207.4	87099	92697.9	77614.4	78096.1	86486.5	80619.7	84075.1	88083.6	74578.7	76843.6	80515.4	80345.2	78038	79046.4	79615.3	82000.3
9	acceptor	69684.4	71996.7	72384.8	68954.4	73869.8	71337.5	68198.6	70289.4	73258	58579.1	78821.1	70367.5	74152.6	79281.2	67204.1	71706.7	74444.7	76814.1	68655.7	68592.5	73819.7	78862.8	75482.5	71111.8	84350	78882.4	83900.6	82070.9	75435.1	60033.9	-7198.4	2811.76	-204.072	-1906.38	3854.06	175.659	3607.77	-1812.18	1990.1	-654.12	1123.48	-2378.8	3063.5	1840.51	967.013	-1503.07	538.383	3272.8
9	fret	0.866822	0.877207	0.818854	0.927347	0.913266	0.863369	0.848453	0.88995	0.88995	0.949782	0.871433	0.903917	0.848453	0.878363	0.937953	0.866822	0.810937	0.871433	0.921472	0.856475	0.870279	0.920298	0.878363	0.86452	0.958092	0.961661	0.924995	0.949782	0.891112
10	donor	7917.45	10527.2	3170.87	4609.83	64.7678	13300.2	1082.37	9071.62	5842.28	5420.92	11246.7	9324.77	-6683.71	6258.65	1192.29	2193.24	734.286	8673.58	1768.54	-131.758	10998.6	4798.03	5144.45	2567.97	3205.84	2036.68	1308.87	11293.4	-1580.72	2458.05	-3907.37	2711.2	-543.129	-524.809	12156.1	4486.59	14584.3	2089.98	-4097.24	9426.37	10607.2	8218.9	10493.9	14422.8	-987.808	3449	5470.88	4558.2
10	acceptor	31097.1	33367.3	33321	24273.2	33260.7	27674.2	27603.2	30545.2	30879.6	37053.6	27624.1	29366.3	29174.9	33791.5	28208	36175.3	29718.4	26443.6	34981.1	32108.2	28615.5	32475.8	28004.6	29306.6	29221.8	30304.4	28456.5	33393.6	24537.8	30128.2	20636.8	23274.2	32711.6	30184.4	29411.5	23690.4	29821.8	27444.7	31730.6	24127.9	22195.9	28611.3	35806.2	25960.7	35383.3	37717.5	27542.8	35277
10	fret	0.796797	0.760189	0.912543	0.839842	0.997493	0.675475	0.962664	0.771568	0.841016	0.87294	0.710769	0.759054	1.29784	0.843366	0.958962	0.942982	0.976288	0.753388	0.951574	1.00374	0.721909	0.87175	0.844542	0.919814	0.901678	0.936864	0.956497	0.747736	1.06866	0.924673	1.23378	0.895663	1.01633	1.01762	0.707437	0.841016	0.671101	0.929542	1.14855	0.718562	0.67657	0.777259	0.773851	0.642855	1.02901	0.916176	0.833979	0.886069
11	donor	9075.82	4020.22	6495.69	7602.26	14259.8	9393.97	1260.09	7211.54	4334.19	7235.26	8277.64	35853.9	58042.4	55548.8	58984.3	63293.3	897.281	-2948.49	-2105.66	-48.8111	-2006.58	803.789	2418.28	-819.082	-7091.48	-5428.14	-802.337	-5781.18	2884.36	-2107.05	-4666.25	-1541.91	-2532.65	-1356.32	2510.38	686.574	-2348.46	957.284	-3563.87	-1470.74	-5189.53	-1039.56	-1193.05	2044.31	-2864.76	-773.033	1957.8	1890.82
11	acceptor	56339.6	48902.7	52543.9	54209.5	53621.1	48066.8	43802.7	53654.5	55748.5	54791.2	54696.3	27394.8	2727.51	-488.742	611.36	-744.248	2070.41	-930.975	-2628.22	-295.965	1040.97	-4489.57	-399.948	740.367	1500.97	3717.6	-1042.95	2248.53	-2123.1	2118.19	-253.333	-2420.05	-399.078	4584.04	2394.31	-2996.63	-3535.21	1290.73	2960.17	-3215.99	-1614.09	-359.512	2091.52	528.738	5097.75	-558.726	248.278	-1048.62
11	fret	0.860747	0.924381	0.89033	0.877407	0.789525	0.836679	0.972627	0.881274	0.928352	0.883857	0.868416
12	donor	6423.07	7241.71	7553.61	4087.51	1605.65	8187.37	6079.25	3653.25	7268.98	2151.63	6395.14	2312.57	4345.54	4935.41	4944.06	5555.21	3328.06	2590.55	3523.57	3813.52	5666.94	2334.51	7190.5	6385.16	4754.53	6445.68	3566.13	3286.16	5695.53	5654.3	7994.52	3346.68	7075.45	4457.93	5807.26	1378.88	10103.3	5216.05	2005.33	7650.7	6411.1	7493.09	5025.86	10288.2	8178.06	11696	47270.7	47681.7
12	acceptor	28840.6	34392	39233.3	41039.4	42766.9	39655.4	48781.4	45270.2	42343.8	41895.2	51389	47668.1	46769.5	35501.1	44930.5	33496.2	45198	48516.5	38749.3	40824.1	38302.1	43094.1	38508.4	42724.6	44351.4	55521.4	37718.7	48066.4	48730.1	48106.5	53029.8	34727.3	40628.3	41806.1	36655.6	46760.2	25658.3	48898.1	54884.3	36747.1	49979.5	46032.8	43204.4	50079.9	41521.8	41183.9	-4991.94	1963.54
12	fret	0.818126	0.826332	0.838852	0.909431	0.963589	0.828555	0.88912	0.925303	0.853336	0.951042	0.88912	0.953568	0.914758	0.878068	0.900695	0.857631	0.931171	0.949142	0.916746	0.914758	0.87108	0.948507	0.842497	0.869675	0.903393	0.89595	0.91343	0.935704	0.89527	0.894589	0.868972	0.912099	0.8519	0.903393	0.863322	0.971632	0.717862	0.903393	0.964832	0.827815	0.886372	0.85977	0.89595	0.829295	0.835189
13	donor	42792.1	34634.2	28384.1	29216.8	80719	102367	95097	98847.4	101980	104357	106540	97538.1	105512	104927	84190.8	100864	105568	107966	111910	107450	103008	98682.7	96247.9	101969	98909.1	97384.6	101352	106575	91607.7	88927.5	97207.3	99824.2	95374	97628.4	94527	97063.2	86885.3	92117.5	99273.2	90054.7	99292.2	86165	90933.3	80503.7	83069.9	80302.6	31311.3	60.3748
13	acceptor	66394.7	61307.1	65236.6	64985	12710.8	4288.21	602.861	-280.959	3424.48	-1216.6	1298.84	-360.764	1069.8	642.566	817.73	2546.16	1959.69	5622.08	6922.19	436.888	2897.02	862.588	-1163.96	2616.44	4446.39	-1607.3	721.255	-4541.23	2441.28	1499.39	2349.28	4545.78	-1790.15	789.935	-1364.68	-2632.39	2818.27	-5322.98	967.659	3988.99	4641.95	-3026.7	5356.59	-3372.74	-3707.93	2694.02	-221.246	-3457.83
13	fret	0.607999	0.638907	0.696833	0.689606
14	donor	10723.7	13698.5	16950.8	17999.1	13952.6	10470.8	8193.43	13745.4	18592.3	16994.1	13311.3	15037.7	16223.9	10564.8	14035.1	11548.1	19538.3	12874.1	15873.5	16441.9	22475.1	15670.6	20194.6	13216.1	14471.6	86993.8	107580	101003	108511	107526	106334	110229	110662	103324	106973	110722	113575	106271	102071	103332	99184.1	106496	60851.9	-3112.29	1981.45	1473.83	5745.61	11475.2
14	acceptor	85382.9	92602.9	93311	98258	96284.2	94268.1	92503.5	98724.2	89697.6	90695.9	93439	93899.5	93263.6	90716.1	88484.4	91817.4	88453.8	93927.4	92098.6	92308.5	98072.9	96367.8	95364.8	91242.4	93113.9	18372.6	-3629.61	942.714	-2824.3	-352.379	2362.77	-2166.17	4908.63	1587.49	1462.97	-3156.64	3729.59	4992.32	690.219	1498.44	-1863.07	4299.94	1344.91	4908.05	-1099.37	-3913.58	178.928	-721.279
14	fret	0.88898	0.870834	0.846047	0.844925	0.873097	0.900372	0.918682	0.877627	0.828137	0.842681	0.875361	0.861799	0.851664	0.89581	0.862927	0.887843	0.819219	0.879894	0.852788	0.848292	0.813658	0.860671	0.82479	0.873097	0.865184
15	donor	7824.23	8083.78	14109.1	8896.4	6886.59	13115.8	11250	5266.79	9291.84	4054.66	12148.2	-1394.52	5497.8	6950.46	4850.97	11996	10324.6	10245.8	5257.28	7093.15	10240.4	9453.55	13160.6	7639.42	7188.27	10304.2	2172.58	6042.72	4868.63	17598.8	7923.43	5747.84	45539	52733	56722.8	56104.5	58039.5	58755.7	49647	56713.2	57463.3	65229.4	66638.6	56771.7	64461.7	68316.9	55783.8	61525.1
15	acceptor	58689.8	49216.8	48044.1	52301.8	49563.6	57516.8	58068.3	59088	51311.2	58008.9	52187	50044.5	48715.9	52576.9	67048.1	57093.6	54728.1	51169.2	49321.2	56361.3	55644.7	51740.8	48305	51658.5	58148	53991.9	56378.3	61117	65219.6	60853.9	57149.7	51976.9	19607.7	-3532.3	163.527	-1362.78	445.208	1729.16	1205.04	9546.63	4332.78	3983.89	-549.91	347.304	1401.93	3306.05	2771.89	2182.13
15	fret	0.882033	0.858596	0.772557	0.855099	0.878504	0.814644	0.837683	0.917587	0.846957	0.934345	0.811205	1.02846	0.898564	0.88321	0.931944	0.826138	0.841157	0.833059	0.903307	0.887925	0.844636	0.845796	0.786114	0.87146	0.890285	0.839999	0.963324	0.910437	0.930745	0.775944	0.878504	0.900934
16	donor	10302.7	16716.1	11810.5	1059.4	2037.73	11186.3	78869.6	82132.4	65173	62497.6	74502.2	72126.5	65662.2	70410.1	71597	77556.4	70178.6	77377.6	68497.3	66230.3	78277	58808.7	66985.9	68818.1	79658.6	72833.1	56520.7	72592.9	69589.5	63402.2	2833.71	-2026.36	-5269.91	-1954.47	1041.87	1133.04	-2866.17	4609.78	2388.38	4292.44	-2149.09	4497.57	1003.3	-6418.3	1359.21	-5403.16	4769.33	8740.49
16	acceptor	61258.4	68021.7	61656.5	61645	66283.1	57189.8	-737.856	4297.78	3448.3	3948.1	2239.73	3129.12	2639.79	2760.17	-1082.92	2515.37	4272.24	-199.57	1244.12	5177.83	-181.838	-672.12	-1897.15	559.836	-1093.33	-558.639	1900.03	947.377	3979.07	3069.57	414.063	6549.39	-810.36	-5783.3	6302.02	-317.564	-1186.95	-957.778	3607.77	2110.65	-1591.93	1314.87	1028.15	-1166.6	3574.97	-728.314	3051.28	2648.74
16	fret	0.856442	0.803275	0.838945	0.983676	0.970451	0.836272
17	donor	6596.81	9674.32	6426.73	12415.3	12329.9	10704.3	8043.36	9991.2	7314.12	11273	9283.44	4022.37	7773.03	7972.95	11342.3	7777.21	11600.7	6222.64	9019.67	11848.3	7663.82	9412.34	12571.6	16332.4	9233.31	8347.71	10474	7752.14	41061.1	82395.3	89802.3	71428.6	79261.7	80124.6	79071.3	72920.5	72785.6	70082.3	76005.8	84897.5	92832.7	81610	89912.8	95461.5	89412.1	85062.3	84325.3	85758.7
17	acceptor	72364.3	71184	86341.1	73073	77014.9	83178.1	87258.7	70547.5	83087.5	79274.4	76550.6	73931.9	73690.1	79222.1	75523.4	73151.3	68822.4	75280.9	71841	79963.5	70694.6	76206.1	68508.7	80136.5	80068.7	78864.5	68335.7	68116.9	48943.6	-267.375	-2590.33	214.263	1214.25	1861.69	-130.934	-3110.26	451.179	1124.71	2147.98	3787.49	69.997	-1804.19	1468.01	3799.05	5126.74	2085.91	-363.862	-2487.53
17	fret	0.916204	0.879837	0.930615	0.854669	0.862313	0.886427	0.915098	0.87545	0.919526	0.87545	0.891926	0.948416	0.904048	0.908465	0.869971	0.904048	0.85576	0.923958	0.888626	0.871066	0.901842	0.889725	0.84486	0.830731	0.89633	0.904048	0.866688	0.897432
18	donor	40685.3	27996.1	22222.2	27684.5	31313	76533.7	137267	132266	134986	139393	125551	135807	129854	136776	139813	139958	131914	134601	135458	137635	141891	140332	139668	137302	136195	139127	153065	130100	149354	138604	148964	144452	136471	145617	146012	137504	143751	138120	151695	135096	138651	144362	144375	142649	142620	146718	150011	92954.1
18	acceptor	113575	112636	115442	107510	115642	81090.8	522.628	3806.33	-705.34	4216.87	5841.2	4504.15	44.553	6543.39	6273.36	9442.35	5632.3	9065.9	11123.7	3161.14	5484.15	5071.4	7606.57	-429.487	6736.05	4000.95	4418.69	8047.13	8723.48	1106.58	2019.81	3132.14	6637.36	2822.33	10627.5	8129.89	3220.05	2496.71	2312.39	6157.33	5276.52	3774.45	5692.4	1987.98	1634.47	6675.09	5505.9	6176.06
18	fret	0.735655	0.801306	0.837927	0.794862	0.787167	0.514829
19	donor	27072.5	14884.6	24225.7	27873.7	23037.8	9682.68	17436.4	18575.3	42550.6	6841.04	60012.6	65892.7	67002.7	67164.9	66292.7	68991.2	44656.3	21717.7	60704.1	44145.5	26861.3	72129.5	84564.5	41106.4	48088.4	31069.2	58321.9	82742.8	87235.9	77083.8	85647.4	87104.3	88085	94985.6	94398	88281.2	94291.2	100053	94535.4	87336.9	80934.4	38703.5	-3236.6	2035.7	-4069.53	-2067.16	-5552.4	879.537
19	acceptor	60398.4	73166.5	67068.5	56037.1	66473.2	88076.5	85164.6	61670.4	34288.6	80334	15499.8	12552.4	10464	7782.97	12382.4	4920.63	42190.7	69937.6	20710.9	43904.2	70214	9212.64	16986.4	56172.2	64963.5	66491.3	36374.1	3910.4	-2426.66	1448.04	5246.09	736.814	1688.03	-3498.84	1448.19	3605.44	-3178.65	1639.28	4235.77	-2001.08	3698.78	2579.24	130.666	1334.51	2272.57	1761.06	-2246.04	345.565
19	fret	0.690412	0.831231	0.734934	0.667752	0.742211	0.901201	0.830176	0.768266	0.446451	0.921484	0.204863	0.160116	0.1355	0.103458	0.15727	0.0669085	0.486301	0.763047	0.254751	0.498305	0.723515	0.112865	0.167709	0.577903	0.574862	0.681127	0.384192
20	donor	3159.76	595.234	-1676.35	-4136.26	-1180.71	-219.504	-4444.89	-776.612	-2823.26	-1816.29	-411.746	-3483.69	-494.135	838.478	788.783	-3859.01	-1010.7	770.475	-318.894	-103.113	-443.132	-546.445	-138.422	777.014	2380.33	-3146.28	3876.42	303.602	-121.422	-3857.71	2303.18	-1591.35	-4720.83	-2725.18	-337.203	-1321.95	1153.65	20196	74465.7	79435.2	68253.8	64173.6	62980.9	70270.4	75534.1	65011.8	68310	65044.5
20	acceptor	74810.7	83667	80557.3	78880.8	74940.9	70650.8	67172.2	77873.9	72266.1	77280	71186.9	74708.3	79576.8	62247.7	72177.3	82025.1	73048.9	78239.6	92931	70404	66062.9	68023.9	89405.6	67806.9	81054.3	74947.6	87501.1	76793.6	70541.5	75766.1	74566.2	81082.9	78607	81147.3	80875.4	76846.3	76193.8	56037.8	2572.74	823.353	-3760.95	-255.91	-2905.86	-1808.47	-1151.39	-262.135	2145.35	-4273.4
20	fret	0.959462	0.992651	1.02107	1.05572	1.01559	1.00276	1.07115	1.0101	1.04025	1.02382	1.00551	1.04935	1.00643	0.987133	0.988973	1.04935	1.01376	0.989893	1.00367	1.00184	1.00643	1.00826	1.00184	0.988973	0.971469	1.04389	0.957612	0.996327	1.00184	1.0539	0.969624	1.02016	1.06389	1.03478	1.0046	1.01742	0.985293
21	donor	9544.99	13699.3	12401.4	13602.7	7204.11	12113.2	7094.03	8390.39	8643.8	14287.7	9741.38	10492.9	9256.74	16457.6	11309.4	17998.6	10081.9	11794	10300.5	14446.9	12822.7	12270.7	18324.1	18959.2	17070.5	16044.2	11157.3	10728.9	19253	17027	20120.9	28645.8	17866.4	15266.5	18298	17466.5	14096.1	12923.3	16408.5	13917.1	15824	12139.3	18632.9	22883.9	12455.3	15249.1	13257.5	14124.6
21	acceptor	52737.8	57297.5	65661.7	56755.8	63521.4	62509.1	57209	55722.2	63450.1	62924.2	63705.7	55003.4	61321.6	64449.2	59396	56736.2	60441.9	66354.8	49506.8	53518.6	59402.5	60622.9	55380	56686.9	60353.7	63316.7	57386.4	56734	59550.9	57625.4	55458.9	61098.7	61575.9	63494	62579.1	54666.1	53339.8	55518	63721.5	71569	51062.3	65939.2	54234.9	60475.5	62018.2	56908.6	48457.8	58786.8
21	fret	0.846431	0.807141	0.840615	0.807141	0.898194	0.837131	0.889889	0.868655	0.88043	0.815181	0.86748	0.839453	0.868655	0.796843	0.840615	0.759438	0.856934	0.848761	0.827866	0.787723	0.822092	0.831336	0.751575	0.749333	0.779754	0.797985	0.837131	0.840615	0.756065	0.771844	0.733695	0.680815	0.775238	0.805995	0.774106	0.758313	0.791139	0.811732	0.795701	0.837131	0.763942	0.844103	0.743736	0.725912	0.832494	0.788862	0.785431	0.805995
22	donor	12389.6	-4952.12	7426.32	5263.71	-185.473	6272.69	8487.23	7355.84	322.723	5070.82	344.979	10416.1	9425.72	1212.99	6450.74	307.884	2622.58	1138.8	582.384	8928.65	-4506.98	-4199.1	2029.07	-2648.55	-2355.5	-3594.46	3646.39	196.601	2236.8	-7941.94	-5107.92	2859.99	1869.56	8821.08	6094.63	-9722.48	11792.4	1331.69	6617.66	7192.63	-608.35	-975.587	6268.98	2989.82	-8305.46	13049.9	474.81	-8012.42
22	acceptor	56117.2	65511.4	61480.8	57533.5	45071.7	60378.2	61795.5	70207.9	59988.9	61910.9	91661	50119.7	52991.2	57979.5	52053.4	48461.2	53701.9	54741.8	62358	47805	67559.7	64004.4	73327.7	83999	52374.9	48170.9	52096.9	50742.6	56008	51912.4	60919.1	57228.2	36657.6	63569.3	61096.8	60321.8	54496.6	61070.5	44231.5	53924.1	67559.4	54817.1	74377.6	53985.1	51071.1	62109.9	59567	47915.4
22	fret	0.818848	1.08143	0.892079	0.916629	1.00372	0.906253	0.878822	0.905309	0.994412	0.924165	0.996275	0.828409	0.849377	0.979487	0.890186	0.99348	0.953289	0.979487	0.990684	0.842711	1.07131	1.07039	0.972947	1.03251	1.04731	1.08051	0.934514	0.996275	0.961721	1.18095	1.09154	0.952351	0.951414	0.877875	0.909085	1.19181	0.821716	0.978553	0.870287	0.882613	1.0093	1.01767	0.922282	0.947662	1.19453	0.826499	0.992548	1.20085
23	donor	9616.9	7121.75	11722.9	10189.6	4772.51	4608.36	9460.04	11108.9	4513.51	11545.4	6873.69	6778.85	4227.76	9603.52	12095	9468.55	10519.1	11442.1	7434.25	10249.2	12913.4	11535.7	7118.1	7643.4	11834.8	9941.56	8623.46	11847	13667.3	12225.1	16250	10121.5	11802	8324.33	10340.4	15542.3	17002.6	13302.5	9033.24	15443.8	15659	15310	25670	24933.1	24688.7	22298.2	17258	13570
23	acceptor	67073.4	66558.6	62203	68758.6	69593.7	68933.6	65623.8	62570.2	65268	62217.1	65821.5	66192.1	72391	65170	74803.6	64053.7	67682.1	72071.6	68979.8	69582.1	73748.9	72494.4	72173.8	67871.8	70865.5	69882.6	64734.7	60589.9	66614.7	61828.1	59745.8	68073.9	78019.2	66404.4	66852.1	63540.3	63638.8	69599.3	66909.6	73632.5	70759.2	66333.9	64518.8	77619.8	68580	67070.9	69286.9	75360.8
23	fret	0.87461	0.902889	0.841389	0.870706	0.935977	0.936949	0.873634	0.849212	0.935005	0.843345	0.905812	0.906786	0.944723	0.871682	0.86094	0.871682	0.865823	0.862893	0.902889	0.871682	0.851167	0.862893	0.910681	0.898992	0.857031	0.875586	0.882417	0.836497	0.829646	0.83454	0.786512	0.870706	0.868753	0.888269	0.865823	0.803192	0.789457	0.839432	0.881441	0.826709	0.818877	0.812015	0.715664	0.757032	0.735377	0.750145	0.80025	0.847257
24	donor	16099.6	24766.7	21595.6	12866.5	17475.2	11677.1	12506.6	61910.9	79151.9	75815.4	74911.5	76264.3	78634.8	80304.1	75964.3	73908.2	68447.4	74388.1	75438.9	78889.2	61151.7	62661.7	69469.2	62121.9	71136.4	65092.2	82767.7	85882.8	75900.2	73631	83444.1	79013.3	75079	83731.6	81530.7	74127.5	87572.8	88187.1	80045.5	78897.5	78980.2	79952.4	73285.6	84039.8	75203.1	69649.2	80759.1	84302.5
24	acceptor	56196.1	43951.7	59047.1	62974.9	72238.9	68384.1	56878.9	21042.1	3356.9	-119.004	-2406.73	-151.774	-2423.36	-752.386	-1873.18	-402.45	2989.05	2830.6	-1823.64	4103.51	-6455.63	-255.01	-6879.26	4611.8	3723.16	2639.87	-161.404	-2204.44	-4724.64	3034.32	33.584	-4598.48	-3255.16	9094.43	1060.32	-1130.89	-717.51	-469.304	-4887.42	529.899	2512.41	-2360.95	-7615.2	2797.15	3870.27	1260.8	5184.05	7217.85
24	fret	0.777192	0.640048	0.731949	0.830684	0.805546	0.853697	0.819873
25	donor	9652.48	9392.92	11180.3	11510.4	16337.3	12708.2	14872.6	9389.9	4750.9	6592.53	10362.5	5438.65	10185.5	7274.26	9053.26	10019.8	10190.3	8154.72	9032.78	9927.1	9111.67	11429.1	7605.48	8190.86	7417.59	8649.16	6069.19	7433.25	9653.08	800.24	4883.99	11351.4	11557.9	4667.18	7584.41	5351.92	8461.26	11004.5	9666.93	6300.44	3588.58	9921.07	9359.79	4525.06	8348.04	6975.55	5577.76	5026.12
25	acceptor	20494.8	23891.4	27763.6	18393.4	25999	27588.5	28833.2	27335.1	29756	24386.4	37856	31586.2	29573.6	29282.8	27093.8	32944	32088.7	25965.6	28437.8	30434.5	23503.1	21704.3	40469.8	29636.7	30043.5	25655.1	29933.9	22563.7	30942.5	27879.8	30214	29718.7	22761.3	32206.2	26998.6	31463.3	24188.2	31429.8	37024.9	26153.3	27912.3	30422.4	32255.6	27748.7	34025.7	31587.5	37196.1	20357.1
25	fret	0.680032	0.717966	0.712748	0.615499	0.614551	0.684508	0.660157	0.744551	0.862605	0.786962	0.785329	0.853435	0.743703	0.800746	0.749625	0.766374	0.758868	0.761376	0.758868	0.753836	0.720566	0.654644	0.84186	0.783694	0.802357	0.747936	0.831727	0.752154	0.76221	0.972315	0.861082	0.724024	0.662891	0.873205	0.780416	0.854969	0.741156	0.740305	0.792659	0.80557	0.885936	0.753836	0.775509	0.859557	0.803161	0.819123	0.869463	0.802357
26	donor	8229.71	8865.72	5980.93	6672.86	3979.26	5564.73	7921.46	7410.32	9721.53	10556.5	11015.7	8069.74	7791.4	10834.9	71965.7	86947.6	88045.4	86505.4	85813.5	88137.7	79592.6	96373.3	88585.1	89558	85588.5	82721.9	80902.3	93190.6	79891.7	74548.7	87604.4	79185.5	84434.8	90359.2	92063	87017.9	88107.8	89745.3	87291	88988.3	83801.4	97558.2	89102.8	85511.7	91042	82948.2	90065.2	101122
26	acceptor	84720.3	79935.9	84657.6	78606.5	87427	77954.4	78037.3	82206.3	85108.9	80840.6	90533.5	85821.8	89978.1	94388.9	18277.7	2731.29	2863.17	11464.5	-234.475	5772.01	7092.37	6424.57	1025.57	7507.75	11495	5697.02	3756.24	401.051	6928.86	1983.35	4627.32	11997.5	5835.81	794.303	3885.44	3178.14	3152.95	7149.49	3193.26	8245.4	3401.25	8976.79	6035.41	7093.56	5550.56	2686.76	6930.73	4715.09
26	fret	0.91181	0.899664	0.934089	0.921935	0.956383	0.933076	0.907761	0.916872	0.89764	0.884488	0.891569	0.913835	0.91991	0.896628
27	donor	-13287.1	-242.663	-14353.6	-9722.87	-4392.35	-5961.54	-794.641	-2722.62	-4686.08	-5586.98	-4938.41	1042.65	-4630.88	492.648	3293.93	-7428.22	-7325.71	17594.1	-6982.7	-98.7553	3357.01	841.577	16586.7	16947.5	-3189.83	-4459.37	10477.5	-2026.73	-3755.6	646.413	10942.8	-69.1858	4589.1	4634.45	11914.6	-1721.17	-2771.9	1795.71	5152.91	394.081	5184.45	3496.98	1448.75	1850.91	4549.68	3165.79	-905.035	1399.47
27	acceptor	54076.9	47996.5	49925.6	47557.2	47108.7	46295	47001.2	48241.2	47297.5	55664	47021.6	49698	44186.6	51976.5	52720.1	46069.5	38005.6	35789.2	44569.7	45518.7	42905.9	52742.2	34473.4	47664.4	60667.6	48284.9	45347	54994.7	56595.1	58222.8	62608.5	50271.1	56512	59089.4	60963.9	58376.1	61953.2	57133.8	50479	58219.1	50600.8	52204.3	60963.4	58567	58071.3	59272.9	48694.1	63458.6
27	fret	1.32501	1.00477	1.40411	1.25755	1.1036	1.14771	1.01774	1.05918	1.11056	1.11231	1.11756	0.97926	1.11756	0.990387	0.941813	1.19141	1.23832	0.670593	1.18587	1.00155	0.928044	0.984017	0.675533	0.737766	1.05583	1.10187	0.811809	1.03751	1.071	0.988792	0.851277	1.00155	0.925005	0.926524	0.837037	1.03085	1.04747	0.969797	0.906916	0.993584	0.906916	0.937207	0.976098	0.969797	0.928044	0.949526	1.01944	0.977678
28	donor	12045.9	11487.3	12196.5	8793.39	8585.58	11275.7	8846.77	8705.69	5666.72	12753.2	4961.31	5748.7	3670.6	9260.49	11113.6	7950.71	8339.64	15008.6	10063.1	5905.03	6459.82	9102.25	6860.19	11615	6820.15	11737	2031	10581.7	2812.67	12267.1	6137.62	10772.3	9020.27	5161.49	7758.16	6154.78	8377.77	9458.76	8526.48	6036.58	10086	7611.36	5436.03	13119.3	6690.51	4995.62	12894.3	7849.67
28	acceptor	42107.7	47869.1	47104.1	43518.6	45973	43073.4	47583.2	47587.8	43750.1	41916	48526.5	37698.6	41376	34342.6	56495	44148.3	40623.1	44594.7	39070.4	43409.1	49954.6	46124.5	46633.3	48188.8	53282.1	51378.9	52337.1	52108.7	44802.3	49767.7	42490	54283.1	45204.6	47466.5	46156.7	40067.3	40883.5	41835.5	49337	46474.6	53589.4	45732.1	49685.2	45623	53889.2	41892.6	49916.6	45291.9
28	fret	0.777909	0.806722	0.793895	0.831404	0.842175	0.792827	0.843253	0.845411	0.885501	0.76622	0.907312	0.868124	0.918254	0.787494	0.835709	0.847569	0.829253	0.748211	0.794962	0.880064	0.885501	0.835709	0.871378	0.805652	0.88659	0.81422	0.96227	0.831404	0.941313	0.802433	0.873548	0.834633	0.833556	0.90185	0.856213	0.86704	0.830328	0.815293	0.85297	0.885501	0.841097	0.857295	0.90185	0.776845	0.889856	0.893124	0.794962	0.851889
29	donor	-3459.82	-428.07	-4518.51	2078.02	-847.939	-1364.57	-2516.75	-3540.18	-714.27	-2350.28	2638.94	-4935.1	-1202.2	-112.348	-1605.67	3703.38	3686.98	577.32	2007.5	-3960.87	1724.58	2985.83	637.184	-279.639	-166.472	861.059	300.141	-3007.15	-2941.54	-1049.67	-2440.49	-1028.35	-118.088	3873.13	3901.83	2654.52	1123.48	-2603.68	1949.28	2163.31	-2983.37	2184.63	-105.787	-2667.64	485.473	1742.62	4359.42	-232.076
29	acceptor	51412.8	58618.6	59819.4	59474.5	49551.5	54142.6	50154.7	41425.1	56694	55209.1	48644.9	53784	56803.8	67735.9	60604.1	62728.9	50964.5	55238.1	50324.5	62365.9	49812.7	50028.4	56298.6	55145.6	52880.8	44542.4	44844.6	54477	47113.3	52960.4	52916.7	44895.2	56192.8	53974.4	65392	60107.9	53170.5	63294.3	63825.9	56935.8	48823.5	50751.3	52298.2	46808.6	58389.7	49172.7	65060.6	51607.4
29	fret	1.07208	1.00765	1.08199	0.965834	1.01779	1.0262	1.05298	1.09351	1.01272	1.04464	0.948594	1.10089	1.02199	1.0017	1.02704	0.944268	0.932119	0.989794	0.961534	1.06794	0.966693	0.943402	0.988941	1.00509	1.00339	0.98126	0.9932	1.05881	1.06628	1.0203	1.04798	1.02367	1.0017	0.932989	0.943402	0.958089	0.97955	1.04297	0.970127	0.963254	1.06545	0.95895	1.0017	1.06047	0.991497	0.965834	0.937332	1.00426
30	donor	3103.42	7780.17	3480.04	2466.37	5786.55	5915.84	6168.79	2153.46	2475.73	4576.15	6646.58	1548.26	3935.34	632.018	7750.19	7647.13	7311.74	6659.7	5458.66	2777.4	5441.79	7656.5	5728.47	10622.6	2588.16	5861.5	3714.25	60682.1	73595.6	67845.2	63578.8	67948.3	68476.7	72096.6	62750.6	56929.1	68982.6	64099.7	58849.6	71667.6	59348	64086.6	69664.6	68373.6	64558.8	63299.6	70878.7	61435.3
30	acceptor	64826.7	61305.3	55792.6	63205.8	63564.2	58257.6	58426.7	67008.1	60095.3	52729	51787.8	59640.1	50334.1	54259.6	54864	61501.1	54062.7	65664.1	60477	60153.9	47371.5	60469.4	66116.4	58080.5	53625.7	55890.6	61268.1	-61.715	-2699.38	5959.22	4904.83	1886.89	-2462.41	-977.202	3258.31	-3143.5	-3482.23	-517.537	380.765	-422.799	-58.315	1942.83	-485.939	-1878.78	3325.66	2451.72	-741.605	2524.98
30	fret	0.954399	0.887621	0.941236	0.962501	0.916947	0.907843	0.904809	0.96858	0.960476	0.919982	0.88661	0.974659	0.927066	0.988848	0.876503	0.889642	0.880545	0.907843	0.916947	0.955411	0.896719	0.887621	0.919982	0.84519	0.954399	0.904809	0.94326
31	donor	23262.8	41893.7	15393.4	27463.6	35634.3	36184.1	19226.9	20828.1	29023	18919	26770.8	21958.6	25739.3	18144.8	25642.5	29805.9	11203.6	23682.9	11428	18967.4	16974.8	19710.8	18831	17399.3	30483.3	44669.3	22317.1	25413.8	17157.3	24866.1	21474.7	32711.3	29975.3	33883.6	19904.3	20542.2	15276.9	28776.6	17126.5	18428.6	25105.9	22708.5	31644.6	33542.7	23053.8	18030.5	10647.2	28011.2
31	acceptor	83122.9	75542.3	61628.8	68716	74993.4	62814.3	64096.2	57423.2	64842.9	80352.1	64576.1	77883.2	81531.4	70104.6	74738.4	76987.4	82376.3	61441.6	67940.4	58854.2	63446.9	75066.1	73371.1	71926.6	69349.5	71641.7	73586.8	64192	73388.5	72647.2	66242.1	61019	74982.3	81225.3	76333.3	71307.7	69957	73928.8	66681.6	64312.6	68084.2	60528.5	56608.9	70726.9	44757.9	59881.4	59448.2	66962
31	fret	0.780926	0.643277	0.799652	0.714599	0.678209	0.634865	0.768865	0.734031	0.691006	0.80961	0.707074	0.779827	0.760122	0.79412	0.744877	0.721063	0.880164	0.722142	0.856479	0.755759	0.78861	0.791915	0.795236	0.80518	0.694213	0.61602	0.767771	0.716752	0.810718	0.744877	0.754669	0.650655	0.714599	0.706	0.793017	0.776535	0.820709	0.719985	0.795236	0.777632	0.730784	0.727541	0.641172	0.678209	0.660155	0.768865	0.848621	0.704927
32	donor	34156.8	43373.6	57102.1	50094.2	39561.5	47418	44240.4	52867.1	40334.4	37397	44133.4	47498.9	52686.9	53645.2	51465	50707.8	38942.7	40441.4	30893.1	42702.5	47109.9	47418	46723.5	43671.2	43652.9	42671.2	45833.1	48386.6	54219.6	49512	47347.5	44720.8	41864.4	40485.8	56653	41564.2	54559	44611.2	38470.2	49115.1	42890.5	45303.1	50979.3	46102	56916.7	62875	42378.8	51005.5
32	acceptor	48737	30660.8	34747.5	46784.9	40018.7	42525.4	47096.5	45718.2	42917.4	47201.8	43833.8	46958.3	47827	47421.8	55703.6	38176	53748.8	43135.3	48035.7	33547.5	45418.4	49105.5	38327.9	42031.9	50857.1	41630.8	41864.3	42339.8	48472.6	40320.1	49792.6	53952.8	35351.8	46150.4	49674.9	38284.5	50221.3	40032.9	46140.8	56774.9	42690	42503.8	46749.6	55899.8	37412.5	49726.7	62485	46194.7
32	fret	0.587555	0.414422	0.377942	0.4829	0.502935	0.472865	0.515932	0.463823	0.515932	0.557785	0.497931	0.49693	0.475877	0.468847	0.519927	0.429575	0.579627	0.515932	0.608325	0.439663	0.49092	0.508936	0.450745	0.49092	0.537881	0.493925	0.476881	0.466838	0.471861	0.448731	0.512935	0.546844	0.457789	0.532898	0.466838	0.479891	0.478888	0.472865	0.544853	0.535888	0.498932	0.483903	0.477884	0.547839	0.396201	0.441679	0.595471	0.474873
33	donor	20636.8	11011.7	14872.2	13793.7	10503	5261.67	19840.3	11145.4	7209.36	20819.9	11343.1	22110.6	22369.4	23706.6	17535	19944.9	13645.5	19636.8	21552.5	26349	10694.9	18017.6	10052.4	17444.9	16564.1	23142.6	22351.9	20604.8	8944.84	17677.5	22299.6	10415.8	20212.4	17648.4	13078.6	23642.6	22549.6	16136.8	10773.3	27727	18883.9	25471.1	25270.6	24985.7	20238.5	22131	27785.1	17462.3
33	acceptor	42529.9	43716.8	45269.3	48612.8	58850	52575.4	42499.7	59642.6	45172.4	61423.6	50177.5	54803.6	53052.8	41030.7	50289.5	48783.9	49205.5	50121	52876.7	45052.3	52157.5	44551.7	52680.7	54759.5	46153.1	48588.1	48541.2	52619.3	48281.8	50103	43855.9	49225.5	57457.1	48405.1	49888.2	56588.9	43772.2	53701.7	53359.3	55986.3	53050.7	55258.7	51158	49209.5	46166.4	39133.4	47064.6	49366.9
33	fret	0.673316	0.79906	0.753114	0.779039	0.848951	0.908516	0.681463	0.842466	0.861999	0.747041	0.815517	0.712115	0.703802	0.634355	0.740963	0.709735	0.782773	0.71808	0.710924	0.630965	0.829576	0.712115	0.83988	0.758013	0.736117	0.676802	0.684969	0.71808	0.843761	0.73975	0.662904	0.825729	0.73975	0.732493	0.792776	0.704986	0.659449	0.769123	0.832146	0.668679	0.737327	0.684969	0.669837	0.662904	0.695534	0.638886	0.62871	0.738538
34	donor	31299.4	24303.8	25194.6	17482	25003	22220.2	28571.2	24321.6	26860.7	26915.2	27089.1	23949.8	17454.1	18079.7	19486.9	17678.7	25896.3	11798.5	16101.4	27793.3	27360.6	20734.3	26104.4	17984.5	30805.8	21956.3	24992.8	22556.5	30782.9	17984.5	19053	24874.8	27496.4	30380.7	33121.6	33120.3	19292.8	31503.7	33871.5	24126.1	23589.4	25424.3	29651.1	32765	22367.4	27887.2	22908	21744.4
34	acceptor	81155.5	88488.5	79733.3	69650.4	71266.8	91530.2	91465.4	88675.5	76025	87898.3	83521.3	95363.2	83239	83641.5	93238.4	80133.6	82127	104349	98094.1	84448	84166.1	90834.4	104840	88464.9	87403.3	76461.6	87995.5	81523.8	86551.2	100094	88457.7	95995.8	90245.4	89604.1	82795.4	84947.2	78930.2	81699.2	85426.3	85669.9	82107.9	77347.6	93354.2	78362.9	102851	91049.8	80197.3	94203.1
34	fret	0.721237	0.784656	0.760065	0.799025	0.740635	0.804161	0.762112	0.784656	0.738591	0.765184	0.754948	0.799025	0.826787	0.82267	0.826787	0.819583	0.760065	0.89804	0.858744	0.75188	0.754948	0.81444	0.801079	0.830905	0.739613	0.776453	0.778503	0.78363	0.73757	0.847394	0.82267	0.793891	0.766208	0.746767	0.714099	0.719197	0.803133	0.721237	0.716138	0.780554	0.776453	0.752903	0.759041	0.704928	0.821641	0.765184	0.777478	0.81238
35	donor	12676	11692	10396.1	14103.5	6683.6	18064.6	19484.1	15927.4	19581.9	21786	20099.6	16465.8	27076.8	19571.6	18084.5	19980.5	23578.3	19274.5	21643.3	22962	16306.9	17535.1	12625.3	18669.9	13916	13011.4	16575.4	21306.5	19779.7	20941	24082.8	43529.5	78951.6	79254.6	71652.3	73281.3	75544.2	76358.4	64453.7	74679.4	57500.8	74051.3	77310	62940.1	66066.5	78719.9	72891.5	66645.3
35	acceptor	44290.4	43138.4	40476.3	39410	52509.8	43445.2	38705.7	40220.9	45802.4	31919.4	41792.2	44529.6	45243.9	34708.2	42957.3	48968.8	42946.4	44646.7	36343.6	48141.5	33229.5	39276.1	43269.4	38598.9	47922.8	43415.7	38237	48428.2	37835.9	48131.7	38645.2	18669.9	-544.136	135.718	1265.14	6855.68	521.721	-9346.85	-4576.93	1084.34	3483.25	6331.08	-5478.44	-150.685	2151.43	-2709.06	1030.45	5784.69
35	fret	0.777782	0.787063	0.795394	0.736653	0.88664	0.706435	0.665417	0.715906	0.70074	0.594677	0.674999	0.730065	0.62586	0.639416	0.703589	0.710227	0.645211	0.69884	0.62683	0.676912	0.671169	0.691228	0.774063	0.674042	0.774994	0.769409	0.697889	0.694084	0.656771	0.696938	0.616144
36	donor	1182.97	657.309	178.528	1680.22	-892.69	4820	8319.22	3984.62	2832.42	4508.86	4476.19	2042.51	4243.19	5746.31	7635.86	2095.07	6050.34	6671.19	5430.91	6110.01	2549.7	2522.71	2764.23	9913.26	20622.6	68100	69831.9	68378.5	56872.1	66501.7	68418.3	68053.2	61711.1	73177.7	66766	68659.8	70093.3	69338.9	75038.8	73308.4	72521.3	66764.6	64933.3	72465.9	74758.9	66177.8	73414.9	71977.2
36	acceptor	65337.5	62251.7	70121.1	71529.7	63652.7	58197.2	68124.2	71964.8	57954.3	72048.6	69620.9	67686	59418.8	60005.7	59391.6	56431.5	62482.8	65038.8	61408.2	60559	63005.6	61288.5	55949.9	72672.9	44244.3	773.853	-2136.83	1060.26	-774.753	-3156.72	-1955.16	1344.98	915.236	-3453.45	2559.84	-3734.63	-3506.11	2610.07	6011.63	-9126.11	-2752.76	982.709	-1948.81	-5958.84	-1391.74	-2822.17	-4817.08	2294.37
36	fret	0.982115	0.989476	0.997894	0.976861	1.01369	0.923427	0.891088	0.947489	0.953776	0.941206	0.939113	0.97056	0.932836	0.912984	0.885882	0.964262	0.91194	0.906723	0.919249	0.908809	0.961115	0.960066	0.952728	0.879639
37	donor	6948.13	9157.67	6432.07	12137.3	70763.8	74943.9	86259.2	90425.8	80352.6	75189.4	78746.8	84872.8	77326.3	86572.3	88430.2	82100.1	80865.1	81273.9	83472	77938.1	74366.2	81756.4	88468.2	77648.5	83143.3	82153.3	82253.5	80054.4	74942.4	79999.8	8069.94	-1526.3	84.517	1621.18	889.172	1787.02	2002.96	1938.33	1341.1	2921.35	2254.48	336.034	1252.42	-85.8331	52.4511	2899.3	1446.82	-193.554
37	acceptor	85935.8	88126.6	85055.6	83099.5	18549.3	-148.98	-3409.44	-4980.52	776.42	-218.368	5671.62	-3738.96	-1182.34	7673.61	-2640.16	2800.94	-1864.31	5330.07	-1149.42	4777.82	-1122.39	3307.11	1269.85	334.201	334.399	-94.667	444.805	-254.055	709.698	-3498.82	1755.9	6497.56	-878.888	-100.235	-584.434	1844.19	-4970.44	1025.92	1503.53	1687.55	1835.66	315.934	422.272	-53.791	2572.25	-3159.32	-2829.4	-1021.86
37	fret	0.924954	0.906111	0.929838	0.872875
38	donor	496.337	3825.36	5016.85	7877.31	5665.4	1592.62	1301.07	2801.96	1241.57	3377.62	3057.81	4655.39	2038.88	3806.02	8387.52	6764.66	5454.17	4851.74	2613.05	11487.5	6089.34	-727.875	560.3	5476.49	7082.99	5768.04	4970.74	10264.7	4647.95	8899.22	63066.5	62465.6	65126.7	63810.3	69037.4	63021.9	60707.4	64638.8	73297.6	4060.39	4421.85	2575.86	-2689.89	-3525.86	96.1999	-933.15	1216.29	3597.77
38	acceptor	51293.1	61475.3	55650.8	72296.8	57967.9	65487	63083.4	57116.6	58583.6	69292.6	62777.3	66597.4	62268.1	64725.4	63954.7	72888.7	64502.7	67602.1	63360.2	64941.7	63916.2	50796.3	60252.3	64260.5	68138.9	64186.2	65228.4	74352.7	52002.9	49069.4	297.799	303.861	-1006.67	788.397	3352.29	1147.06	848.489	2601.13	5344.29	-3330.85	1124.24	-5952.25	909.282	4294.2	220.763	-4687.17	-710.929	-5240.08
38	fret	0.990317	0.941215	0.917062	0.901929	0.91119	0.976522	0.979776	0.953599	0.978963	0.953599	0.953599	0.934579	0.968364	0.944524	0.884137	0.915386	0.922082	0.932917	0.960174	0.849829	0.912869	1.01444	0.991126	0.921246	0.906144	0.917899	0.929589	0.879026	0.917899
39	donor	10606.2	7916.78	9240.08	12553.7	10917.4	13429.3	17323.4	10224.5	14762.4	17036.3	15615.8	14780.3	9073.33	12312.9	14810.6	14654.5	11879.5	13753	12487.7	11199.2	12633	11027.1	10429.6	13528.3	8969	12419.9	13743.2	12965.6	18399.7	11148.3	14707.1	17236.9	17275.3	15988.5	10405.5	12757.9	13101.2	19814.8	11946.4	16957.8	20297.3	13399.9	11515.7	17681	13704.9	18176.8	17019.3	12853.3
39	acceptor	74291.2	74708.6	87560.1	76450.9	77414.2	84592.9	76783.1	72859.4	76741.2	84664.8	81373.2	82183.8	77132.9	83963.8	79627.1	85421.1	78955.7	83848.9	85096.5	80965.1	76591.6	83356.3	79443.3	81137.1	80194.6	78798.5	80724.6	83595.3	76016.2	80006.9	79030.1	78703.4	79152.4	74628.1	74558.7	73902.4	83593.3	84134.1	80736.5	89525.8	82631.1	86503.2	88684.1	84867	87597.7	76221.7	82793.7	82214.9
39	fret	0.874548	0.904202	0.904202	0.85925	0.876738	0.862524	0.815833	0.876738	0.838574	0.832064	0.838574	0.847268	0.894295	0.87236	0.842919	0.8538	0.869079	0.85925	0.87236	0.878929	0.85816	0.883314	0.884411	0.857069	0.899796	0.863616	0.854889	0.8658	0.805046	0.877833	0.842919	0.820156	0.821237	0.8234	0.877833	0.85271	0.864708	0.809358	0.871266	0.840746	0.802892	0.8658	0.885508	0.82773	0.864708	0.807201	0.829897	0.864708
40	donor	6374.12	11467.4	2431.95	8200.59	11185.5	10422	14694.5	12583.2	7422.43	13931.1	7507.59	8884.78	12634.6	10445.5	8081.67	12539.2	14772.4	7125.85	12659.6	11521.7	7435.65	15165.8	13061.9	13241	10549.7	9936.03	3547.8	14741.5	13547.9	9576.31	13608.1	10078.4	12109	10057.9	13747.5	7986.23	8406.14	8247.58	10516	10830.2	12069.4	11539.3	17121.5	11319.1	8080.2	13145.6	12891.6	15371.4
40	acceptor	72327.2	66177.8	62677.9	65810.1	68836.2	75831.5	64864.9	83267.8	74815.4	68300	74062.8	71856.4	73599.6	65857.4	65438.4	72985.2	73265.8	77594.3	71794	73288.1	64207.1	63043.1	74165.6	71507.1	69729.8	79238.7	66144.4	69919.9	69477.5	63900.1	83220	66404.2	77263	73560	63780.7	77510.8	61367.6	75521.5	74437.6	75989.9	69697	69914.9	72705.9	72046.9	68969.7	67496.2	78191.9	74806.9
40	fret	0.91915	0.852632	0.962172	0.889592	0.860218	0.878691	0.814887	0.868902	0.909276	0.831027	0.908181	0.889592	0.853715	0.863473	0.889592	0.853715	0.832104	0.915856	0.850467	0.864558	0.896144	0.806302	0.850467	0.843978	0.868902	0.888501	0.948893	0.825641	0.836419	0.869989	0.859134	0.867816	0.864558	0.87978	0.822412	0.907085	0.87978	0.901612	0.876514	0.875426	0.852632	0.858049	0.80952	0.864558	0.895052	0.837498	0.858049	0.829949
41	donor	15186.6	13517.5	17487.5	14434.6	19855.2	15947.3	12218.5	18277.6	14405.8	13529.6	12783.5	17908.9	17393.3	14581.5	22107.3	15818.4	15869.9	14293.6	14819.3	19267.4	16094.9	14243.5	14270.9	10967.5	16836.3	16889.7	8885.04	18876.7	19039	12378.8	15950	13951	12666	13923	20015.5	18589.5	15713.6	13573.6	11528.6	11668.2	16203.8	15545.9	15381.6	16375.5	16899.1	19037	14240.9	21923
41	acceptor	66382	69009.8	77498.9	81228.9	73896.1	69047.8	85773.2	68846	68842.9	76043.6	80297.2	75359.4	72120	66921.2	68069.6	77527.7	67390.4	56813.3	68806.4	65987.9	62393	70864.4	66079.5	64674.2	72491	71881.9	67498.7	75262	71322.1	73938.8	77149.8	63603.3	68858	66161.4	65316	62639.5	70185.3	66230.1	77915.9	72388.4	70483.8	79637.8	69096.2	72170.9	78496.4	81117.5	78092.1	76319.6
41	fret	0.814284	0.835811	0.81616	0.848866	0.787941	0.812407	0.874866	0.789828	0.8274	0.848866	0.862813	0.807712	0.805833	0.820846	0.754802	0.830214	0.809591	0.799249	0.82272	0.773768	0.794541	0.833018	0.82272	0.85538	0.811469	0.809591	0.884116	0.799249	0.788885	0.85631	0.828343	0.81991	0.844208	0.826464	0.765243	0.770928	0.817098	0.830214	0.871161	0.860956	0.813346	0.836745	0.818035	0.815222	0.82272	0.809591	0.846072	0.776606
42	donor	3399.94	6002.23	5914.95	973.266	1625.01	5197.34	3819.11	-525.702	5285.67	2941.58	2159.17	722.916	2308.64	3115.62	2568.4	-578.49	2784.78	1169.26	602.706	4507.44	1987.21	4550.82	2421.01	1378.32	4651.17	1760.38	1200.1	4490.72	1954.81	2724.68	2678.16	3167.88	3986.88	4526.78	2333.21	3681.65	2822.93	4259.18	2116.83	4835.67	3752.73	4450.47	8048.41	3663.36	4864.42	5219.3	2497.32	4109.18
42	acceptor	33193.4	29749.4	24841.8	25542.4	25334.8	25213.7	30164.4	33886.2	33765.1	31950.9	35334.8	30355.8	34159.1	38682.8	31822.4	29149.3	24963.7	26575.8	30618.7	25547	36357.7	20708	28797.2	30595.5	33505.3	28729.5	33639.8	36251.4	27421.4	32812.3	29563.7	34372.1	27717.1	27903.7	28937.1	29742.4	26029.3	27599.9	32580.1	28762.7	22307	21887.1	24546.2	34788.3	31844.3	29142.9	22449.2	27800.5
42	fret	0.907206	0.832188	0.807869	0.963441	0.939546	0.829367	0.887483	1.01589	0.864455	0.915914	0.942511	0.976999	0.936567	0.925719	0.925111	1.02005	0.899644	0.9577	0.980895	0.850234	0.948398	0.820117	0.922672	0.957122	0.878371	0.942511	0.965722	0.890108	0.933573	0.923282	0.917148	0.915914	0.874425	0.860423	0.925111	0.890108	0.902175	0.866461	0.938951	0.856366	0.855688	0.830779	0.753163	0.904695	0.867795	0.848176	0.899644	0.871119
43	donor	17501.8	2404.02	21419.9	14115.1	6896.88	-148.32	23749.7	4937.82	2954.04	26926.3	179.22	5240.64	21104.7	3102.36	8893.02	14708.4	11173.4	9881.82	-939.36	12162.2	15011.2	14671.3	10357.7	19819.3	-994.98	38884.6	30047.2	12675.2	23304.8	25881.8	10543.1	16920.8	9325.62	6186.18	10302.1	13416.8	16883.8	38285.1	8800.32	21197.4	17402.9	13973	15555.1	14733.1	35720.4	22105.9	17501.8	11235.2
43	acceptor	33326.4	59254	36640	40261.5	50775.6	44688.6	48169.8	15290.1	47575.6	39709.9	46238.5	44771	46088.4	55166.8	38705.8	37206.3	43720.2	49467.6	39776	42928.2	35277.2	44692.9	34214.9	37754.2	61239.6	37900.7	53992.3	57700.2	45203.7	42713	38770.7	38597.3	56743.7	52845.8	51036	54241.2	45225.2	47916.1	40663.5	45056.9	41276.9	59876.3	61414.1	42519	58153.8	54685.9	54543.9	53947.6
43	fret	0.655247	0.961054	0.63089	0.740974	0.880631	1.0033	0.670125	0.755691	0.942024	0.59535	0.996708	0.895693	0.686471	0.946755	0.813674	0.717293	0.796811	0.833657	1.0249	0.778813	0.701776	0.753001	0.767875	0.655247	1.01659	0.493261	0.643001	0.819349	0.660184	0.622492	0.785703	0.695374	0.858383	0.895693	0.832219	0.801004	0.727714	0.555328	0.822197	0.680156	0.703061	0.810847	0.798207	0.742304	0.618913	0.712097	0.757039	0.827913
44	donor	7482.11	9180.99	4209.26	7009.76	5322.09	6873.66	35616.8	62114.3	72253.1	61937.4	67018	64103	57365.9	58815	59927.9	64150.2	63535.4	64057.4	62684.3	67422.3	61965.4	63003.8	60915.8	64718.7	60380.2	63610.6	63381.7	63548.2	69172.4	57219.4	64143	65457.6	55369.2	61953.4	70642.3	69477.4	61215.2	66105.3	10669.3	-1442.98	-2195.55	-3099.42	-5618.11	-53.9393	-1495.82	-57.142	-2578.23	-4434.83
44	acceptor	56913.5	53028.5	45256.5	56470.8	55371	56532	30585.7	-2051.69	-4838.87	-5479.73	-6552.9	-4252.21	-6460.23	-5031.82	7231.94	794.699	-223.844	2846.39	5512.34	-7463.07	2484.51	-5614.88	-7160.97	-8989.44	390.367	-2774.32	-5297.81	-4718.73	-4514.86	-2394.47	1200.9	912.007	-7598.97	-4745.69	-1922.23	-908.983	-1162	-3473.19	-2132.78	-2878.71	-3114	2102.76	6830.37	-733.935	-5423.23	-1488.77	-475.036	-9379.89
44	fret	0.883499	0.852275	0.914656	0.889346	0.912711	0.891294
[truncated: 562 more columns]

## Sheet: 378-378_inter_liposome
1	donor	39733.5	43322.7	38379.6	40857.8	41059.3	35034	36323.5	35482.9	37440.4	34164.5	33803.8	39144.7	35387.3	43518.3	34925.9	30853.7	26949.7	44487.1	41710.3	32186.9	37964.1	34560	29087.3	29548	40599.3	46902.3	46592.7	47395.6	43434.6	49313.2	45977.3	53189.1	39697.2	37204.9	31569.2	38721.8	41048.2	33547.5	31669.2	37886.3	39410.6	41808.1	37096.8	41224.5	35728	35259.2	39411.3	34972.5
1	acceptor	8921.9	8058.13	9157.15	12774.4	8433.58	6993.35	6389.61	6784.23	10835.2	4555.99	7177.96	11180.6	10430.8	4217.5	7887.27	7526.62	11309.9	6193.1	11242.6	7428.1	13690.7	7812.6	9771.73	11639.6	5880.65	8022.99	4887.95	5278.71	7502.26	-2812.01	7384.83	7178.99	11457.3	6874.93	8407.98	13283.1	12150.8	1345.67	6496.11	2632.19	10241.6	2611.73	15954.3	13993	9755.94	8531.14	11579.1	5457.33
1	fret	0.182715	0.156512	0.192237	0.238815	0.170369	0.166227	0.149528	0.160684	0.224358	0.118349	0.174497	0.221712	0.226999	0.087887	0.18408	0.196297	0.295034	0.122644	0.212407	0.188165	0.264682	0.18408	0.251815	0.282478	0.126925	0.146723	0.0952031	0.0995736	0.146723	-0.0607726	0.138275	0.118349	0.224358	0.156512	0.209736	0.255689	0.228317	0.0385788	0.170369	0.0657003	0.20573	0.0582181	0.301265	0.253108	0.215073	0.194945	0.226999	0.135447
2	donor	7432.58	1322.13	17143.9	25340.7	-335.778	1288.9	1002.09	1928.97	6841.47	-4097.54	4797.08	2966.04	1196.21	1266.16	1755.84	6502.2	1430.55	1561.72	-3532.66	-4987.7	6703.32	2824.38	3452.22	6928.92	-181.879	6362.29	3140.92	7824.32	7047.84	4879.27	3378.77	4338.88	10447.6	6030.01	4921.24	4074.8	10692.4	6330.81	26334.1	48000.5	4678.16	8230.06	8717.98	3945.39	12411.5	-2953.8	2028.66	5891.85
2	acceptor	35426.1	32791.6	26939.3	1077.59	28424.9	52099.9	51722.1	42115.6	32827.9	29168.1	40544.1	38754	43025.9	41684.7	52403	42928.1	51955.9	37488.9	46623.1	19663.9	27274.1	42831.5	25628.2	35215.2	39762.6	54674.5	42069	19911.7	36037.7	33546.3	51299.4	33705.5	35986.2	39561.5	46361.6	53073.2	35200.6	31390	12201	1564.77	53308.9	37477.7	34487.1	44456.9	32717.6	40424.7	37757.8	27611.8
2	fret	0.826458	0.96127	0.61125	0.0412113	1.01194	0.976056	0.980668	0.956642	0.827405	1.16304	0.894258	0.928793	0.973286	0.970516	0.967744	0.868924	0.973286	0.960345	1.08211	1.33966	0.802719	0.938091	0.881136	0.835917	1.0046	0.89613	0.930654	0.717434	0.836863	0.872684	0.938091	0.885825	0.775067	0.867984	0.903612	0.928793	0.767416	0.832132	0.317	0.0314756	0.91948	0.819816	0.797961	0.918547	0.725151	1.07849	0.949229	0.824556
3	donor	6608.35	6515.8	4816.94	4062.13	10248.7	1818.25	2178.17	9493.93	2392.07	4627.73	3083.13	4526.95	4915.67	6672.11	896.833	10012.2	3539.72	10820.5	4802.55	1176.55	4699.71	4884.82	-1207.19	-1456.06	2939.16	5028.79	4923.89	8913.93	7825.93	4689.43	-1704.92	4816.94	2176.11	3401.92	5248.86	3521.21	5263.25	4893.04	6859.27	5872.04	5094.6	10178.8	-271.384	4152.62	8095.36	9076.41	2174.06	113.223
3	acceptor	64428.9	73774.3	64562.6	65579.8	63139.4	64761.3	72818.3	65032.5	66480.4	73954.6	66119.8	68702.9	79519	76787.7	68016.4	68321.1	62891.4	64254.6	69078.4	60950.6	65072.6	62845.9	59592.2	63432.8	69330.1	68612.9	73013.9	67170.2	72508.5	67823.9	77170.4	69510	69651.9	71458.4	53587.8	71105	60967.1	63163	65050.6	68557.1	68217.3	74188.9	71719.7	77775.8	66787.4	69554	73623.3	77070.3
3	fret	0.907365	0.919206	0.931043	0.941889	0.859954	0.972436	0.970466	0.872801	0.965541	0.940903	0.955688	0.937945	0.941889	0.920193	0.987205	0.871813	0.946818	0.856	0.934987	0.981298	0.933015	0.928084	1.02066	1.02361	0.95963	0.932029	0.936959	0.882681	0.902429	0.934987	1.02262	0.934987	0.969481	0.954703	0.910325	0.952732	0.920193	0.928084	0.904404	0.921179	0.930057	0.879717	1.00394	0.949775	0.891569	0.884656	0.971451	0.999016
4	donor	32335.9	32089.7	39796.9	55907.9	51115.2	45745.5	53934.2	61933.7	49577.1	50688.9	42421.1	55654.3	65458.4	39091.3	51876	53930.6	50532.7	63923.9	59658.6	40138.7	43532.9	67196.8	48470.8	55393.4	51933	45407.4	49084.6	51633.5	59111	43654.2	59502.4	56064.1	45666.5	33591.1	62578.7	76438.5	74297.6	64997.1	101124	65010	69593.2	62813.9	65772.6	55812.4	70806	63629.9	48114.3	61902.5
4	acceptor	42770.2	37092.1	46309.4	26641	35637.2	26660.1	27294.5	27901.8	29606.3	23718.9	27713.4	25396.2	16272.7	38805.8	31665.8	21416	36718.5	35046.2	29994.1	28010.5	27749.9	22239.6	27940.6	21297.2	25499.2	33305.8	32807.3	30527	27867.5	31572.2	24037.4	24066.8	37750.5	34418.6	21675.8	16797.1	7095.07	22045.5	6739.06	22271.6	26633.3	17372.5	26869.9	21716.6	15451.1	24521.8	23706.3	34936.6
4	fret	0.569906	0.535682	0.537928	0.32285	0.411068	0.368145	0.336185	0.310594	0.373747	0.318452	0.395563	0.313205	0.198774	0.498309	0.379385	0.284071	0.420901	0.354301	0.334395	0.411068	0.388865	0.248693	0.365358	0.277383	0.329047	0.42288	0.400379	0.371876	0.320209	0.419913	0.287459	0.300231	0.452093	0.505881	0.2576	0.180114	0.0873185	0.253539	0.0624016	0.255161	0.276549	0.216349	0.289997	0.27989	0.179377	0.278218	0.329936	0.360734
5	donor	2587.39	677.632	-1647.46	-1573.29	-1180.21	-439.3	-1369.34	1379.24	-4827.67	-2974.28	1098.89	-2341.64	-336.952	-305.802	1361.44	-4237.31	-2644.98	-2930.52	-1208.4	-994.058	-1321.13	-4993.06	-3283.55	477.386	-1044.49	-828.669	608.659	21944.6	29654.1	29978.9	33786.6	44138.6	43245.7	49036.5	48861.5	44278	49126.2	47462.7	46516.4	40799.7	46307.2	45286.7	48329	41713.4	45289.7	46991.8	46520.1	48096.1
5	acceptor	40784.1	46806.4	43710	51483.9	37309.8	54552	55992.9	56679.4	52877.6	49881.4	50676.6	45637.4	44007.5	47878.4	46791.6	51472.7	49134.3	46668.7	43938.6	62590.2	49350.7	55442.5	49212.7	37288.8	48945.7	51896.7	47162.5	-1729.07	-4921.65	4440.03	-1999.96	-37.229	2403.48	922.362	-252.506	1014.05	-2612.14	-2504.39	-504.507	3882.18	535.013	-451.478	-2820.23	-2.3	-2786.24	-5083.62	-3569.31	-4729.16
5	fret	0.94062	0.985916	1.03932	1.03118	1.03281	1.00825	1.02547	0.975925	1.10026	1.06357	0.978426	1.0539	1.00744	1.0066	0.971749	1.08995	1.05712	1.06678	1.02792	1.01646	1.0271	1.09868	1.07159	0.987578	1.0222	1.01646
6	donor	-5995.17	-4143.26	5966.9	7502.07	-5898.1	2996.18	-945.199	4447.05	886.276	2411.23	4270.8	-2485.48	2424	495.459	-1024.38	5131.62	-1336.02	3662.86	5535.21	2406.12	5169.94	2526.17	6145.7	3134.11	1519.76	3126.45	-536.502	-232.533	-3239.01	1297.53	-2557	4592.65	-2717.92	4263.14	3106.01	3139.22	9632.4	2370.36	-1167.43	-1596.56	-791.938	5673.14	2615.58	-5136.9	2704.98	1915.68	3890.2	-2684.72
6	acceptor	41463.3	53139.4	48248.5	35755.5	47054.4	36414.7	43188.6	41805.1	42870	42946.7	43587.6	45906.9	38700.3	38139.9	36541.5	35753.2	42093.9	40077.9	52753.1	38256.8	47474.4	39186.8	29370	44052.1	54281	44331.6	41669.1	43932.8	31066	40694.3	45056.8	44631.9	46467.8	41785.6	33648.9	40654	46004.8	39741	41534.6	46644.9	41860.9	39162.3	44425.3	46710.4	51097.9	38159.7	49978.8	34071.1
6	fret	1.16936	1.08424	0.89045	0.826395	1.1436	0.923516	1.02232	0.904093	0.980134	0.946511	0.910936	1.05672	0.940748	0.987132	1.02943	0.874603	1.03297	0.916648	0.905233	0.940748	0.901815	0.939596	0.827508	0.933845	0.97315	0.933845	1.0129	1.00585	1.11683	0.969664	1.0603	0.906372	1.06269	0.907513	0.915505	0.928103	0.826395	0.944205	1.02943	1.03534	1.0188	0.873474	0.944205	1.12411	0.949974	0.952284	0.928103	1.08544
7	donor	968.58	3029.81	1800.58	2069.13	1883.71	1570.4	550.579	518.61	3578.88	5074.26	2326.48	1296.27	-301.406	1820.57	2620.6	1260.3	3648.42	1810.18	2629.39	3161.68	210.904	3379.08	2762.07	2149.85	2782.85	4247.85	970.178	2310.5	2861.17	2856.38	1364.2	366.755	2515.1	82.2271	3615.65	2719.71	3275.18	3007.43	2244.96	3065.78	2694.13	175.738	811.929	1931.66	1138.02	3113.73	3492.57	3557.31
7	acceptor	40784.4	34831.5	37600.6	41693	41274.2	40318.5	44728.2	37938.6	41969	42258.3	45195.1	44386.7	44463.3	37043.7	38717.7	42542.8	41565.1	40348	41374.2	34313.7	32784.2	38129.2	40227.1	41946.8	41564.9	44008.3	38185.9	44482.5	34614	44088.4	46940.3	39827.9	37819.5	42838.2	37337.4	37210.5	37582.8	40177	41765.7	44849.5	40243.6	43968.9	42632.9	37292	35622.1	42354.7	43414.7	39782.5
7	fret	0.976726	0.919872	0.954345	0.95293	0.956463	0.962793	0.987743	0.986372	0.92133	0.892531	0.950805	0.97187	1.00675	0.95293	0.936527	0.971175	0.919142	0.957168	0.940115	0.915484	0.993889	0.918411	0.935808	0.951514	0.937246	0.911815	0.975341	0.950805	0.923514	0.939398	0.97187	0.991162	0.937964	0.997967	0.911815	0.932207	0.919872	0.93004	0.948675	0.935808	0.937246	0.99593	0.98156	0.950805	0.969086	0.931485	0.925694	0.91768
8	donor	15232.4	24218.5	19565.3	34645.6	14241.3	12722.3	18458	31738.8	18287	24334.7	24505.7	17430.4	11910.5	13049.4	20352.1	23237.4	20257.5	17584.7	18170.8	32635.2	17822.1	24299.9	23034.9	22797.5	33594.8	22077	25178.1	74826.7	108248	102879	104735	102213	85265.4	104279	80950.8	85816.6	91764.7	98547.9	113721	102728	138752	103986	99801.3	109669	115229	109564	105117	99457.7
8	acceptor	86582.8	70186.7	76662.6	80534.7	98878	98021.1	87363.4	72485	72447.2	80902	89401.7	83258	78131.5	94944.1	93671	77858.1	83273.2	83840	81153.4	65730.4	73952.2	70135.6	78011.7	90815.5	66506.8	72194.2	70532.8	20610.9	-3945.8	-5671.17	-4653.35	-2463.6	-5558.93	-3920.88	-5092.42	-5439.65	-4266.67	-1780.89	-7676.77	-3012.97	-2560.22	2518.86	-2972.36	762.293	-2104.17	3503.82	1135.15	-4669.78
8	fret	0.85067	0.743472	0.796224	0.699325	0.873923	0.885531	0.825428	0.695389	0.798173	0.768902	0.784523	0.827368	0.868114	0.878761	0.821539	0.769879	0.804018	0.826396	0.816672	0.667821	0.805966	0.742493	0.771833	0.799148	0.664863	0.765971	0.736615
9	donor	-1732	4422.62	-1240.03	174.111	1990.13	5530.05	4490.44	-3031.76	2141.97	-476.78	-1875.74	1483.99	3177.52	2537.77	121.473	-1667.21	551.688	2305.96	-112.362	857.395	3324.3	1413.13	1347.34	2175.37	2234.09	3035.81	8516.25	983.929	-1753.26	6442.1	5750.72	7278.24	4173.6	1755.28	4753.63	216.627	4503.6	-166.013	417.057	4798.17	5633.3	2676.45	8078.95	1243.07	6709.34	6119.19	5694.03	3967.1
9	acceptor	31787.4	34336.8	34858	27854.4	33502.5	35443.2	30541.1	34180.8	28763.3	37574.4	31134.4	36603.1	35587.8	31581.4	33076.7	31822.7	38345	38877	34143.3	42522.5	32749.8	34525.3	37715.3	27883	23888.9	31389.7	33243.3	42338.2	39278.5	36370.4	35072	31608.7	36731.5	38243.4	44973.5	35036	29234.3	34480.1	27960.9	28146.4	27516.8	32108.2	36850.3	34096.2	35787.5	31588.5	31579.2	31994
9	fret	1.05779	0.886363	1.03674	0.993714	0.943554	0.864605	0.871853	1.09684	0.93105	1.01258	1.06412	0.961293	0.917521	0.925845	0.996856	1.05569	0.985338	0.943554	1.00314	0.980106	0.908164	0.960249	0.965471	0.927927	0.914401	0.912322	0.796506	0.976968	1.04621	0.84909	0.859431	0.812976	0.897777	0.956073	0.904008	0.993714	0.866675	1.00524	0.985338	0.854259	0.830502	0.922722	0.820189	0.964426	0.841858	0.837727	0.847023	0.889474
10	donor	9677.42	7569.48	2580.53	11204.5	7721.55	3182.5	8526.29	7020.31	15735.1	6585.21	8122.86	9081.79	7886.3	4946.16	11217.2	4979.96	7615.94	8462.92	861.226	12626	7005.53	11318.6	8346.75	7573.7	9899.2	4614.55	618.326	9284.56	8215.8	7432.19	2905.81	5182.72	6737.28	6798.53	12182.5	14598.8	5165.83	7345.59	4177.33	8376.33	4405.45	6386.66	3752.79	6902.03	6369.76	751.392	7757.46	6553.52
10	acceptor	34816.8	33783.7	39187.4	36082.8	34754	35657.6	27638.5	37915.4	34607.1	30835.4	30546.8	36657.5	34280.1	31775.7	31179.4	34655.9	32374.8	39950.9	44297	38768.9	37524.8	45640	39273.8	30980.1	33582.9	31328.3	26849.6	33998.9	30352.6	29443.2	30862.6	38568	46047.1	38491.7	33973.2	28994.9	34464.8	35096.3	39830.6	34738.4	40989.3	25601.6	33571.2	29723.2	41106.2	47010	35505.8	34835.3
10	fret	0.782821	0.817427	0.937731	0.762814	0.818631	0.918654	0.763985	0.844088	0.687028	0.823455	0.789931	0.801839	0.812618	0.864936	0.734912	0.874823	0.809018	0.824663	0.980338	0.754635	0.842869	0.801839	0.824663	0.803034	0.772181	0.87111	0.977731	0.785188	0.787558	0.798259	0.913596	0.881026	0.872347	0.850198	0.736067	0.664639	0.869874	0.827081	0.904776	0.805425	0.903519	0.800645	0.899753	0.811417	0.86617	0.984256	0.821042	0.84165
11	donor	-2125.35	345.454	-815.427	-349.395	-54.4518	121.885	-81.7421	3538.4	1282.77	-313.708	-515.235	-1589	827.23	-396.628	934.292	1060.25	2056.34	1937.73	702.325	1777.14	532.287	3371.51	656.142	968.929	256.236	1206.14	-1622.59	1744.6	-116.38	978.376	1682.67	8.52571	2298.8	2229.52	6609.59	59126.3	62440	68684.2	62791.6	65093.4	67105.6	66964.9	66384.5	66672.1	64926.5	62717.1	61935.1	69342.3
11	acceptor	62751.4	67769.3	61795.4	66372.4	60936.7	59191.9	64623.6	62091.1	67695.2	66735.1	64349.2	66038.4	57835.7	64431.7	62133.2	62300.1	62964.1	62769.5	64896.3	63715.7	65238	63370.1	59827.3	70815.7	62982.2	66246.5	68468.9	59365.5	63235.7	65848.8	59587.2	59559.7	63229.2	63835.3	60766.1	13.802	1214.12	-186.359	981.72	-4276.06	-4815.92	-4211.42	2911.47	609.794	2714.72	-5831.2	-1028.5	-90.915
11	fret	1.03477	0.995105	1.013	1.00572	1.00083	0.997554	1.00163	0.94638	0.981175	1.00488	1.00813	1.02432	0.986101	1.00651	0.985281	0.983639	0.967984	0.970463	0.989379	0.97294	0.991835	0.949718	0.989379	0.986101	0.995921	0.981997	1.02432	0.971289	1.00163	0.985281	0.97294	1	0.964674	0.96633	0.901684
12	donor	-2287.52	936.457	-2551.82	-1444.68	-213.311	-4114.48	-901.466	26.6303	1137.42	-609.152	2742.71	1722.05	-780.886	1036.33	-1112.18	175.223	97883.6	112546	102132	122651	89259.1	107802	138241	120338	87323.7	120271	116642	111487	113736	110021	130083	102991	113200	105954	106710	113219	67291.7	2137.38	-1850.27	552.795	-3779.54	1968.08	-3633.38	-320.492	-1631.03	-1207.18	-207.221	373.754
12	acceptor	122274	118825	111012	102989	107693	105714	107545	101705	112786	105509	114240	100861	109482	105472	103737	106435	2369.19	1858.48	-1458.14	-3537.18	414.908	-166.836	-1952.31	-4216.18	3248.13	-5026.53	-297.091	-960.693	-1448.34	-1359.57	-3496.45	956.993	-4212.66	1395.65	-3783.4	-3112.1	-2729.53	3065.08	-4109.16	-1357	-1197.77	-3962.24	465.22	-3485.02	1189.25	-775.824	371.708	-4637.26
12	fret	1.01927	0.992083	1.02382	1.01473	1.00226	1.04095	1.00792	1	0.989824	1.00565	0.976294	0.983054	1.0068	0.989824	1.01133	0.998868
13	donor	2752.56	4866.59	4853.92	3050.34	4255.19	-84.8127	4879.26	7384	3363.96	597.338	4403.02	4571.98	5923.61	3916.23	6816.95	7663.83	5084.12	7020.75	16385	91702.5	98438.5	91085.8	97514.5	99561	96932.7	103016	94343.5	96083.7	90840.9	86575.8	80667.7	102939	88901.1	85278.1	94649.7	98106.9	96723.6	92251.6	89603.3	89858.8	20189.6	-1185.12	1551.93	-421.664	55.6303	-159.786	-1120.71	-944.365
13	acceptor	91890.9	102494	92814.1	87518.1	92094	77093.9	95826.5	91814.6	97092.8	91632	91140.7	85921.7	100008	103706	92632	96388.8	94007.7	99313.8	89496	11163.8	12217.5	7028.07	7814.69	7418.94	7520.53	7512.61	6036.46	4224.91	9802.82	3571.91	5020.89	4058.79	4214.16	5522.04	5366.48	4310.87	735.093	774.269	1093.09	3673.66	4013.54	4916.33	2160.43	5363.55	-1274.23	1250.47	4983.06	3016.41
13	fret	0.970903	0.954391	0.950503	0.966048	0.955362	1.00097	0.951475	0.925208	0.966048	0.993216	0.954391	0.949531	0.943697	0.963135	0.931049	0.926182	0.948558	0.933969	0.845166
14	donor	5569.8	5826.26	5162.4	2728.25	3684.89	1279.1	875.109	7072.28	128.407	4706.21	7846.22	3621.34	7972.18	4811.75	2897.33	4153.56	962.489	417.782	2450.22	2730.52	5889.81	2807.68	6075.92	3874.4	718.505	3740.49	3260.47	3053.94	5886.41	2955.21	3344.44	7732.74	5454.05	5043.25	4252.29	5362.13	3838.09	-469.636	3834.68	6624.03	7628.33	-533.185	8213.89	7270.87	8174.18	7031.43	5674.2	2455.89
14	acceptor	84387.9	90201.2	90206.7	88768.5	83431.1	86664.9	88625.3	81481.7	89919.1	86799.1	80285.3	84000.6	76274	82313.4	72854.2	82531.5	85345.2	85374.5	80997.2	78250.4	82814	86276	85252	73889.4	79361	76489.3	79670.3	76581.3	74287.8	71355.6	84487.5	88799.7	78621.3	77313.5	85419.2	81601.4	85664.9	74178.5	80772.7	86693.9	83619.6	71491.6	76679.3	83746.6	71145.9	79684	73528.4	72916.3
14	fret	0.938423	0.939448	0.945597	0.970212	0.9579	0.985614	0.989723	0.919991	0.998972	0.948672	0.910781	0.958926	0.905667	0.944572	0.962003	0.951748	0.988695	0.994861	0.970212	0.966107	0.933301	0.96816	0.933301	0.949697	0.99075	0.953798	0.960978	0.962003	0.926133	0.959952	0.962003	0.919991	0.93535	0.938423	0.952773	0.938423	0.956875	1.00617	0.954824	0.929205	0.915897	1.00719	0.903622	0.919991	0.896465	0.918967	0.928181	0.967133
15	donor	12496.7	15980.8	7167.31	13276.2	6480.77	12976.6	14038.1	7908.51	29491.7	103702	122674	93985.6	99226.5	100475	104674	100186	110663	99593.8	97966	102084	91475.6	101179	98217.5	101633	106685	100665	92307.6	102377	97703.7	97051	99143.4	107370	84828.9	87176	102187	104520	99104.1	37358.5	50191.7	90735.5	80713	75767.3	90193.3	86237	102255	105874	97122.1	91431.9
15	acceptor	86363.5	87159.7	89802.1	85374.8	81100.8	82401.4	84310.6	90142.3	64539.4	-654.02	-1154.79	663.063	2595.65	-1834.72	-5036.92	3529.72	-3716.23	1914.95	-1620.31	-9176.28	5090.78	-724.301	-1812.06	-3495.62	-3348.82	-1022.98	1276.26	1433.56	1433.76	768.945	-3085.65	2213.62	-948.109	-7436.86	4123.54	-2792.2	-3312.26	1038.92	1269.47	-1510.1	3992.76	18.613	5108.97	1750.65	-4067.17	1532.33	3118.61	-1789.44
15	fret	0.873826	0.845348	0.925641	0.865115	0.925641	0.863873	0.857678	0.919249	0.686205
16	donor	113.622	2006.66	2053.08	1416.33	3709.57	-549.939	-1547	-2746.57	-1543.91	-979.363	-452.296	-146.99	-1220.38	-3024.71	-708.438	37.6385	-2406.88	-1740.22	-829.46	2612.81	-2277.61	-1091.79	-2988.61	1398.11	-1516.74	1196.64	-216.784	1266.77	-619.39	-1745.04	206.451	-840.806	-89.5723	-627.298	-38.344	-1532.9	-136.331	-87.1657	-1132.7	-938.106	28.6998	315.785	1167.07	1072.86	644.127	1041.58	-1515.37	-1008.24
16	acceptor	45657.9	45666.9	48793.7	48694.3	47383.9	45767.4	42668.7	47890.9	40053	49744.7	45552.8	52870.4	43497.8	42882.8	45883.1	43161	39607.2	48158.5	47056	49472.6	47966.4	41615.7	43430.2	47437.7	46881.6	37018.1	48378.6	47223.4	43184.8	37463.2	49696	42989.3	46109.8	39936.1	41879.1	52913	44055.3	45461.1	48838.7	40499.1	45780.6	44443.3	37464.9	45318.2	45718.9	44724.5	37205.6	40419.7
16	fret	0.997472	0.957977	0.959301	0.971778	0.927653	1.01194	1.03764	1.06085	1.04005	1.01996	1.01004	1.00252	1.02915	1.07601	1.01563	0.999369	1.06495	1.03764	1.01811	0.949992	1.04963	1.02671	1.07367	0.971126	1.03341	0.968512	1.00444	0.973732	1.01439	1.04903	0.995572	1.01996	1.00193	1.01625	1.00067	1.02976	1.00319	1.00193	1.02365	1.02365	0.999369	0.993031	0.96982	0.976978	0.986004	0.976978	1.04246	1.02549
17	donor	15864.5	4978.02	7564.22	3065.38	2664.5	460.322	10213.3	3030.19	6511.14	4671.39	2525.01	6587.8	7495.11	10758.7	10073.8	951.675	8425.04	4563.32	4954.14	3615.8	6529.99	1162.79	-208.223	3284.04	3038.99	6039.9	1982.14	937.852	-1056.47	-362.792	10622.9	2112.83	4504.26	6458.36	4741.76	-299.96	-3314.69	11175.9	71852.5	69481.2	50285.7	60242.2	62327	56966.1	67509.5	68880.5	55450.5	67145
17	acceptor	62581.3	73565	78486.8	73408.3	74984	62241.7	62776.8	63126.2	72203.2	72415.8	63913.1	59384.9	65673.8	61161.7	66539.6	62960.9	53017.4	71628.2	62870.2	56744.5	51915.8	52993.4	57640.5	61746.3	56152.6	60255.1	57601.2	70852.6	59962.8	67869.9	55581	58257.7	51438.9	61866.1	65696	57960.2	55277.4	47800.2	-910.798	472.568	3320.58	-1000.11	2892.89	2700.44	8150.36	3832.51	1402.23	1936.31
17	fret	0.797486	0.936499	0.911783	0.960197	0.965824	0.992821	0.859513	0.95459	0.917243	0.939269	0.961602	0.899567	0.898215	0.850312	0.868768	0.985673	0.863473	0.940656	0.926842	0.940656	0.888786	0.978556	1.00428	0.949002	0.949002	0.90906	0.967234	0.9871	1.01736	1.00577	0.839862	0.964416	0.919979	0.904984	0.932353	1.00577	1.06307
18	donor	-1155.85	-851.056	-1280.39	-2232.45	-2080.05	1921.57	1595.47	-3695.78	-328.321	1485.68	-5399.99	7997.73	5926.46	-3273	-1857.2	-977.233	48423.6	68682.4	73306.7	70249	69100.3	64910.2	74358.7	63889.3	65496.8	71999.1	62739	72156.4	85695	77824.5	72436.6	78907.7	73001.9	74250.6	83323.9	69568.9	65151.1	71820.4	65485.4	73719.7	74599.6	75035.5	76672.5	69608.3	79099.4	73845.8	83286.2	75825.3
18	acceptor	59701.7	67929.8	67347.9	58456.4	72199.6	74115.8	67782	78091.4	63790.7	70672	59046.6	78074	59174.3	67655.2	74250.5	61864	11879.2	-7149.3	-2974.46	5069.09	3981.81	-1318.14	-2077.52	-6339.02	-2643.22	-4530.74	-5572.37	1399.14	-10152.4	-6182.23	-5605.35	-670.415	-1088.73	-4783.83	-5372.19	-3620.4	-4039.53	877.334	-3825.5	-5859.35	2460.62	94.455	-8095.87	-4690.65	-2130.42	-3217.91	1041.36	-5569.5
18	fret	1.01926	1.01245	1.01926	1.03977	1.02951	0.97519	0.977439	1.05005	1.00565	0.97969	1.10069	0.907137	0.909351	1.0512	1.02609	1.01586
19	donor	1127.5	2174.74	-439.824	-931.099	918.761	523.012	2442.11	1282.16	475.502	-86.5312	4457.75	1184.11	2633.67	3214.91	2203.55	2844.94	2229.33	1226.06	399.183	687.781	4459.78	-830.519	1521.73	6824.16	2843.42	3306.9	-1135.8	1764.84	1214.94	349.146	993.564	1993.8	1421.66	249.071	1020.35	-602.572	2470.42	-1401.14	2518.43	1577.33	-630.37	-1512.34	1974.6	3914.93	2085.79	1342.31	-61.766	610.956
19	acceptor	75373.9	70178.4	67060.1	67635.3	77720.8	73607	71944.5	74180.4	64411.3	65616.5	70664.2	70240.8	77414.7	72798.1	73950.8	77304.2	77243.1	71193.4	71642	74524.8	74693.8	79108.1	69118.6	68398	68700.6	73933.2	72392.5	73177.1	69276.7	71313.2	75423.4	66610.1	67184.9	65559	72982.2	68442.9	69276.7	71266.5	61943.1	71163.3	73757.8	74951.7	75530.9	68209.8	72958.4	74250	67022.2	70528.6
19	fret	0.984942	0.969825	1.00619	1.01412	0.988491	0.992921	0.967151	0.983167	0.992921	1.0009	0.940308	0.983167	0.967151	0.95733	0.970716	0.964475	0.971607	0.983167	0.994692	0.99115	0.943898	1.01059	0.978725	0.909658	0.960011	0.95733	1.01588	0.976057	0.983167	0.994692	0.986717	0.970716	0.979614	0.996462	0.98583	1.00883	0.965367	1.02028	0.960904	0.978725	1.00883	1.02028	0.974277	0.945692	0.972497	0.982279	1.0009	0.99115
20	donor	69371.1	57946.7	60737.1	53371.5	66309.9	59119.1	68718.4	61696.6	63660.6	50211.9	58651.5	28900	52005.8	51688.7	66036.7	46772.2	65760.1	58490.6	57695.5	69604.9	74858.2	56346	63689.6	52107.7	46272.2	56396.9	57768.4	55576.3	47905.3	61665.3	42121.8	69371.1	78030.6	78666	74302.7	54060.2	48919.1	57053.2	48749	45113.7	57865.6	41817.5	69321.4	47243.2	44253.7	48436.5	45499.1	47287.2
20	acceptor	66785.6	55254	76208.2	67731.7	62747.9	57745.7	55559.7	55621.4	59314.6	61154.7	67947.8	71237.1	65527	62678.2	50310.9	69864.3	57009.7	63089.9	70574.8	56007.2	63815.5	61669.2	68042.3	63592.8	68137	73664	69085.7	58126.7	74931.5	58686.7	63328.8	72286	58557.6	73598.6	67710.2	48197.6	69085	54052.7	69347.5	70074.7	56138.3	73065.8	69124.6	70609.1	72430.7	67166.4	61714.2	63603.2
20	fret	0.490746	0.487714	0.556557	0.559696	0.486704	0.493783	0.446738	0.473626	0.482671	0.549252	0.536792	0.711833	0.557603	0.548211	0.431958	0.598814	0.464622	0.519271	0.550294	0.445749	0.460633	0.522352	0.516195	0.549252	0.595614	0.565988	0.54509	0.511079	0.609518	0.487714	0.600951	0.510044	0.429015	0.483678	0.476636	0.471621	0.584984	0.486704	0.587105	0.608445	0.49277	0.636509	0.498854	0.598814	0.620278	0.580747	0.575464	0.573354
21	donor	-2946.97	9782.95	10129.4	5931.87	4972.79	-3162.45	7926.07	-741.522	-1265.42	6696.59	9109.07	2414.55	9453.4	-992.91	5481.9	3099	4036.95	1945.58	720.328	2032.19	-2507.57	4748.87	1858.97	9144.98	9561.14	5507.25	6544.49	346.415	-7683.2	8107.74	4237.64	-2627.98	2340.62	2803.25	2625.8	7619.75	6664.9	-2070.28	3686.28	3884.85	2522.29	3538.4	5788.22	5479.79	11037.8	9630.85	7448.64	13448.1
21	acceptor	38900.4	43885.9	30107.2	54134.9	62249.4	43708.3	55084.7	50852.7	64881.1	44666.6	51836.7	54056.3	30288.2	66333.6	43317.2	42369.6	61556.9	67325.1	55711.6	46633	59429	40452.9	59162.3	44473.7	36174.3	38395.1	64809.2	48647.6	43862.8	55494.7	58260.3	50739	52232.4	49559.1	53813.8	84765.1	49264.2	46752.8	33885.9	66939.5	55362.4	51633.2	48051.8	32547.4	35891.9	44048.5	60454.3	46857.3
21	fret	1.08157	0.817482	0.748045	0.901061	0.926348	1.07829	0.873773	1.01517	1.0202	0.869347	0.850679	0.95742	0.761885	1.01517	0.887891	0.931551	0.938473	0.971972	0.987295	0.958278	1.04442	0.894923	0.969409	0.829191	0.791187	0.874658	0.90806	0.993232	1.21275	0.872889	0.932417	1.05438	0.95742	0.94624	0.953125	0.917655	0.880841	1.04608	0.901937	0.945378	0.956562	0.93588	0.892288	0.856026	0.764645	0.820189	0.89053	0.776574
22	donor	11127.5	9470.01	3419.22	2412.6	14594.2	8816.4	9290.75	5573.13	8637.13	13198.7	10371.8	131.832	7269.23	4745.76	2503.61	2845.59	3659.16	3537.81	12983.6	7374.02	9296.27	9922.31	6736.95	3463.35	6863.82	14172.2	4329.33	8910.16	3879.79	2404.32	2961.42	16604.7	35576.1	91991.3	100946	97973.2	102504	68902.3	76103.2	77319.4	80104.8	90295.2	77440.7	76715.4	76640.9	84283	91743.1	73717.6
22	acceptor	88952.1	73075.7	63103.2	64449.1	73578.6	78426.8	63492.6	84091.8	79338.9	57674.2	82368.3	80104.9	66816.8	81268.7	64416.3	83224.8	87649.5	74988.4	88508.3	75762.1	80904.3	79904	80507.8	76866	70444.4	77614.9	85213.1	66385.3	78742.2	79418.4	80133.1	74469.7	40995.3	3201.46	2883.29	-678.502	-6228.94	-5177.39	1978.49	-10119.8	1412.86	-4028.48	-342.706	-1870.18	370.463	-2797.55	-10355.7	499.903
22	fret	0.888498	0.885509	0.948247	0.964174	0.834693	0.898458	0.872558	0.938291	0.901446	0.813761	0.888498	0.99801	0.901446	0.94526	0.962183	0.96716	0.960192	0.955215	0.872558	0.911406	0.896466	0.889494	0.92236	0.957206	0.911406	0.845655	0.951233	0.881525	0.953224	0.970146	0.964174	0.817749
23	donor	1884.81	11775.8	-3480.95	14283.2	2105.55	2014.99	2697.03	-3446.99	12092.8	1698.03	5623.3	9868.37	1052.78	4171.49	19767.9	-3659.25	8911.81	11552.2	3769.62	14436.1	5770.46	5365.76	27140.1	12064.5	9172.17	3291.34	20582.9	12955.9	-7205.29	6843.05	9777.8	2238.56	5512.93	8515.6	4944.09	8923.13	8812.76	9293.87	-2934.76	18035.9	22626.2	21242.3	18981.1	16159.6	2292.34	-1627.28	7559.05	-1932.92
23	acceptor	55535.2	67782.8	63555.7	56043.7	69297.3	65798.5	45908.8	63096.1	57328.2	47449.5	63084	63860.4	51304	54677.9	57317.2	58420.2	47059.2	52768.6	55117.2	55930.4	52377.1	56136.1	65751.9	72939.4	49473.8	53320.4	44448.4	79838	51889.7	75781.2	54523.8	55995.7	61389.4	60523.6	68770.9	64562.5	63928.9	64823.9	66744.3	46169.7	28272.9	60219	65088.9	55507.7	72280.8	64432.6	81248.4	63543.7
23	fret	0.966658	0.851548	1.05782	0.797073	0.970341	0.970341	0.94467	1.05782	0.825899	0.965431	0.918053	0.865651	0.980189	0.928908	0.74378	1.06674	0.841023	0.820107	0.936171	0.794781	0.90126	0.913244	0.708152	0.858589	0.843358	0.942239	0.683959	0.860941	1.16154	0.91685	0.848035	0.961755	0.918053	0.876281	0.932537	0.878649	0.878649	0.875097	1.04641	0.719229	0.555121	0.739298	0.774253	0.774253	0.969113	1.02621	0.914445	1.03126
24	donor	5136.62	4640.94	1360.73	4620.66	4306.26	3443.58	949.989	2298.2	4448.88	4718.9	5062.45	2049.73	1831.05	4392.47	6091.84	6315.59	5274.8	2673.45	3791.57	4677.07	2153.05	5998.03	5851.61	4568.68	2703.87	2244.33	5329.94	6242.06	5217.75	5527.71	5446.57	4632.06	8125.25	4263.79	3436.61	5189.86	2166.36	4266.96	4527.48	2355.25	8281.18	5615.81	1775.27	2289.96	3577.33	7315.18	6641.39	4031.8
24	acceptor	78772.3	63411.1	61425.9	66808.2	64506.6	52232.2	67973.4	66595.6	70916.4	62184.7	76140.5	70574	63723.7	75652.4	60453.8	65767.1	67000.2	66760	68196.7	72510	66131.1	68171.5	71746.2	69031.1	70768.6	66963.5	80612.5	69891	72055.8	77492.6	67121.3	72023.7	74979.1	66077.3	68767	73723.4	78756.8	58689.3	73850.1	62435.2	65747.9	68407.5	72114.3	72558.8	68799.3	74032.4	61379.3	70933.8
24	fret	0.938537	0.931914	0.978219	0.935598	0.937068	0.937803	0.985995	0.966814	0.940737	0.929698	0.937803	0.971817	0.971817	0.945123	0.908811	0.912568	0.926736	0.961789	0.947311	0.939271	0.968246	0.9193	0.92451	0.937803	0.963227	0.96753	0.937803	0.917808	0.932651	0.933389	0.925253	0.939271	0.902019	0.939271	0.952398	0.934126	0.973243	0.931914	0.942201	0.963945	0.888317	0.923767	0.976089	0.969676	0.950221	0.910315	0.902019	0.946582
25	donor	8325.34	3651.29	9797.63	4700.55	4215.67	11134.5	1562.6	1802.09	6951.2	7678.51	6786.3	-1169.98	4712.33	7918.99	13131.9	7656.92	3791.65	11101.1	6797.1	11354.3	5481.85	6256.27	4932.19	5913.72	4900.78	7784.52	10477.8	9024.19	5760.6	10577	5828.33	8115.29	9929.16	8832.79	4203.89	4313.82	10152.9	8615.87	5552.52	3879.01	4626.93	8729.73	4532.71	6486.93	10278.6	6730.35	6495.77	6678.33
25	acceptor	59514.7	59665.6	53546.4	51924.6	46524.1	55570.6	51025.3	48423.5	45883.2	55776.7	56601.7	58846.6	48846.1	62456	48104.8	48056.9	53657.7	51510.8	45113.8	56149.1	51338	55456.2	50572.1	56600.9	55195.3	47443.5	49948.3	50616.2	52025.1	49574.5	43473.9	51929.5	66652.1	44255.1	47926.4	50538.1	64725.3	50644.9	54505.6	48116.7	36175.3	46541.7	50227.5	49976.5	37740.4	56791.8	42012.5	46898.2
25	fret	0.877678	0.942454	0.845377	0.917027	0.917027	0.833326	0.970427	0.964126	0.868474	0.878597	0.893279	1.02049	0.912471	0.887779	0.785672	0.862943	0.934298	0.823086	0.869396	0.831468	0.903342	0.898771	0.911559	0.90517	0.918849	0.859251	0.826809	0.849081	0.9006	0.824017	0.881354	0.864787	0.870317	0.833326	0.919759	0.921579	0.864787	0.854631	0.907909	0.925217	0.886862	0.84167	0.917027	0.885027	0.785672	0.894194	0.865709	0.874919
26	donor	5233.49	5956.39	4595.57	4576.42	2218.62	2796.7	323.994	6301.09	3414.27	7153.25	3811.63	5097.05	7001.25	4281.99	3359.22	8684.02	11672.6	2718.9	8158.6	3697.93	3192.85	2292.82	4103.66	604.058	8011.39	2607.59	4243.69	2398.14	3517.2	6001.87	5190.4	2296.41	3659.63	6202.94	6169.43	5027.63	9090.96	5430.97	3498.05	4235.32	5440.55	-1511.98	4617.11	3627.31	9125.66	4873.24	5413.02	-5535.81
26	acceptor	56802.9	59116.7	71335.6	66047.9	67406.4	66795.2	61726.2	68824.3	57015.9	63849.3	74185.6	81751.7	63905.4	61444.5	77287.4	76966	52900.3	73251.9	74985.9	53334.1	67646.4	67108.5	61593.2	66532.3	68838	58821.8	51721.9	73130.9	61673.1	66724.7	64721	67688.1	59662.8	65025	67104.7	64986.3	64589.2	57467.1	60771.2	66823.8	66144.5	68282.7	69347.3	62363.5	63266.1	63841.5	65684.7	68994.7
26	fret	0.916052	0.908889	0.93923	0.934785	0.968428	0.959606	0.994758	0.916052	0.94367	0.899016	0.950762	0.941007	0.900813	0.934785	0.958723	0.899016	0.819011	0.96402	0.901711	0.934785	0.955187	0.966665	0.937453	0.991259	0.895419	0.957839	0.924093	0.968428	0.946331	0.917841	0.925877	0.967547	0.941895	0.912473	0.916052	0.928552	0.876472	0.913368	0.945444	0.940119	0.924093	1.02262	0.937453	0.945444	0.873757	0.929443	0.924093	1.08706
27	donor	16851.2	5636.06	11666.4	18221.8	12948.7	-905.352	5078.55	376.914	-1504.67	12697.8	3694.08	-3892.66	4516.4	1951.87	13812.8	1278.22	-510.451	2388.58	11963.8	2444.34	10802.3	10574.6	7587.33	6625.64	6644.22	-3442.01	7350.4	6198.21	8158.78	-4524.5	1961.16	-7804.5	7336.46	7447.96	8493.28	-1802.01	7759.23	6964.79	-1379.23	595.271	2983.26	4432.78	6416.57	-1783.42	8906.77	8321.39	10546.8	9622.23
27	acceptor	62609.8	57179.7	65083.4	63699.2	75202	55838.5	61021.8	72258.7	70314.2	42407.5	52035.2	78804.3	52185.8	70231.9	70549	71942.3	57138.1	60206.2	66285.1	72654.6	61146.7	54523.5	66674.4	63425.7	70161.3	55404.4	58816.8	58046.1	61065.8	63918.3	69489.1	55179.9	57205.5	64585.9	72891.7	50240.8	69082.6	59291.2	67792.6	57191.7	71087.6	65226.6	55121.3	49539.4	59309.5	51445.8	63355.6	63879.3
27	fret	0.788297	0.910273	0.84771	0.777581	0.852642	1.01602	0.923029	0.994687	1.02139	0.769265	0.933293	1.05255	0.920471	0.973574	0.83666	0.982784	1.0093	0.961796	0.84771	0.967022	0.850175	0.837884	0.8976	0.905194	0.914091	1.06624	0.888777	0.903926	0.882499	1.07588	0.972262	1.16474	0.886263	0.896337	0.895075	1.03759	0.898863	0.895075	1.02139	0.989388	0.959188	0.935867	0.896337	1.03759	0.870003	0.861303	0.857587	0.868758
28	donor	5875.93	3603.73	3194.65	1582.77	982.484	2472.08	8023.62	-44.6715	3096.82	2894.51	3694.89	11227.4	4553.07	2701.08	3532.59	-495.998	1151.45	6531.79	3412.53	1006.94	1651.69	4032.83	5982.64	3694.89	2887.84	3054.58	3990.58	1518.3	35.3666	-31.3323	2803.35	5366.79	-978.45	-273.67	1229.27	1022.5	1491.62	2256.42	755.71	2572.13	3783.82	3072.37	3648.2	3156.85	-71.3509	3012.34	-633.841	-209.195
28	acceptor	78511.9	65017	61643.2	68341.6	83211	68920.7	69587.9	72130.1	75737.5	80774.7	82997.5	60769.5	78665.1	82347.5	79348.1	89744.2	77438.1	88489.7	72680.3	86779	83997.1	75173.1	71195.7	73257	67308.1	61548.7	91937.6	82852.8	74251	70904.4	69426.9	64160.3	81943.3	91106.9	77426.3	82017.7	64776.6	54903.1	85546.2	63520.1	78482.4	62633.6	84454.3	69235.3	71027.3	72541.1	75940.6	61752.6
28	fret	0.930436	0.947576	0.950991	0.977301	0.988255	0.965452	0.896685	1.00085	0.960357	0.965452	0.956955	0.843912	0.945012	0.967996	0.956955	1.00587	0.985731	0.931296	0.955252	0.988255	0.980677	0.949284	0.922686	0.951844	0.958657	0.952696	0.958657	0.982363	0.999163	1.00085	0.961207	0.922686	1.01169	1.00335	0.984048	0.987414	0.977301	0.960357	0.991616	0.961207	0.954401	0.953549	0.958657	0.956104	1.00085	0.960357	1.00836	1.00335
29	donor	14101.4	13086.6	16348.6	8021.95	17590.5	15374	12622.9	12767.2	13327.8	16244.5	8100.01	15688.6	15182.4	11511.1	7063.91	6460.7	12100.1	9363.21	15802.2	9481.49	23142.4	10756.5	13654.3	15665	10091.8	4071.51	10236.1	4868.7	9356.11	8677.2	2768.11	13869.5	13450.8	10836.9	9062.79	5639.86	12826.3	12516.5	3617.33	11113.7	3461.21	9490.95	10844	9285.15	9628.15	14020.9	11712.2	7946.26
29	acceptor	77556.6	79623.8	68230.8	74534.4	77247	78366.8	78569.5	74768.5	86646.9	78764.6	85688.9	77639.4	81749.2	76650.1	72249.4	75059.6	80477.2	77246.3	77078.7	73714.9	71243.3	76390.1	75473.5	72404.7	79946.1	86134.1	80709.3	80669.8	75738.3	73063.6	75107.5	81130.5	75656.6	81033.8	69358.8	71301.5	72136.1	79806.7	73768.5	70893.2	77963.3	74802.4	69497.5	72914.4	75456.1	76405.5	78728.1	78606.6
29	fret	0.84678	0.859035	0.806404	0.903032	0.815247	0.836167	0.862121	0.854423	0.866765	0.828649	0.914308	0.83165	0.843737	0.869872	0.911075	0.920801	0.869872	0.891869	0.830149	0.88554	0.75483	0.876113	0.84678	0.822672	0.8887	0.955516	0.887119	0.943827	0.890284	0.893457	0.963939	0.854423	0.848304	0.882389	0.883963	0.927333	0.848304	0.863667	0.953839	0.865215	0.957196	0.887119	0.865215	0.887119	0.887119	0.845257	0.869872	0.907851
30	donor	3922.14	-328.453	555.271	2340.49	-2693.66	2253.25	3411.62	-798.587	-37.6475	-3737.33	5214.61	2708.84	8461.93	-1868.1	4605.54	4179.02	3203.21	3872.06	8415.08	-1672.62	7151.69	723.292	-764.66	923.624	5891.54	9613.84	2894.63	157.837	1980.21	6479.61	2393.8	5852.76	632.819	6455.38	4749.32	6481.23	3742.81	-406	1846.12	4822.02	4686.31	3287.22	4697.62	8710.73	6618.55	-2255.84	-1945.65	3767.05
30	acceptor	49694.8	61042.6	40893.6	42325.2	56046.5	50284	51532.4	53047.4	31763.7	43768.5	50199.6	35412.3	47257.1	46865.2	53445.4	28082.5	43173.4	41774.4	59083.2	49045.8	37505.6	34877.9	52912.1	41450.8	38374.7	42330.2	50256.4	36798.3	52110.6	39776.4	47814.1	46081.8	46529.2	45283.4	48827.1	49441.8	36598.6	49449.5	34358.1	46737.9	46191	57890.6	30160.1	54521.5	51349.1	54743.6	48837.7	43198.8
30	fret	0.926489	1.00555	0.987036	0.947982	1.05067	0.957303	0.937712	1.01571	1.00093	1.09363	0.905862	0.929297	0.848307	1.04148	0.920871	0.87007	0.931168	0.915247	0.875735	1.03505	0.83977	0.979616	1.01478	0.97776	0.867236	0.815042	0.945182	0.995373	0.963819	0.859671	0.952644	0.88705	0.987036	0.874792	0.911494	0.884223	0.906801	1.00833	0.948914	0.906801	0.90774	0.946116	0.865346	0.862509	0.886108	1.04332	1.04148	0.919934
31	donor	20089.1	13164.3	4225.12	13488	11924.7	4207.91	5196.18	1676.96	12386.1	13195.3	3381.48	8298.73	12809.7	18260.7	19248.9	12196.7	-2572.26	11731.9	10588.6	11532.1	10853.8	18842.6	18202.1	9930.93	7103.86	5251.27	8291.85	12816.6	12871.6	5096.32	7534.29	14868.9	7603.16	10295.9	17468.7	13195.3	11432.3	11084.5	6397.95	-395.998	14724.2	13298.6	6070.82	8987.43	11232.6	9948.15	3457.23	8395.15
31	acceptor	56892.4	45129.4	45086.7	49965.6	51462.6	43095.3	51648.2	52722.9	44509.8	57188	52455.1	45698.7	47829.4	53058.2	50184	45985.8	47380.1	46061.4	40058.9	46573.5	47426.3	44344.4	49220.1	40316.5	51052.3	46427.2	43745.2	42926.6	41434.7	33901.8	38220.3	42582	43871.8	37568.2	49030.1	50347.1	47536	47804.6	54845.4	51302.4	50460	53899.6	40860	56128.8	47509.3	50444.9	42430.5	40738.7
31	fret	0.739467	0.773771	0.913637	0.786941	0.81229	0.91032	0.908665	0.969876	0.782532	0.81229	0.938844	0.846043	0.788415	0.743691	0.722746	0.789891	1.05708	0.797303	0.791369	0.801776	0.8138	0.702235	0.729679	0.801776	0.877697	0.898789	0.841375	0.769419	0.763644	0.869695	0.835184	0.740873	0.852298	0.785469	0.736661	0.792849	0.806269	0.81229	0.895517	1.00721	0.773771	0.801776	0.87129	0.861752	0.809275	0.835184	0.925328	0.82903
32	donor	5875.11	4242.6	7187.85	4234.19	6188.87	3104.17	2337.21	3214.77	3.84582	4171.67	5563.76	2529.55	1557.01	2426.16	6001.34	4352	5595.01	1230.03	3654.75	4510.68	3440.77	1672.42	5438.73	5405.07	4967.49	661.418	4044.25	4296.7	1298.55	4025.01	5500.04	4158.45	2106.39	37586.4	68773.6	69894	71727.3	65066.2	68734	63031	59699.9	63241.4	66835.8	66548.5	67575.1	68325.2	72066.3	67653.2
32	acceptor	59020.7	68964	54404.4	59101.8	63954.4	66693.2	55935.2	67471.9	64417.4	63394.3	67913.1	65544.7	63598.7	56960.3	67471.5	57839.8	54648	63995.9	64141.2	63964.9	62735.9	63777.7	67895.4	65283.4	65912.7	67294.7	59020	68583	60639	69526.2	63408.2	64898.4	66454.7	32259.3	-1903.45	6600.37	-6107.28	5924.84	-1775.38	-999.308	-192.469	-4165.41	-4541.17	3458.06	-2106.01	3469.97	4390.08	3255.28
32	fret	0.90951	0.94223	0.883145	0.933091	0.911676	0.95544	0.959575	0.954749	1	0.938022	0.924579	0.963008	0.975946	0.958887	0.918148	0.930261	0.907338	0.981342	0.946421	0.933797	0.947814	0.974592	0.926003	0.923867	0.930261	0.990049	0.935912	0.94083	0.979322	0.945026	0.920296	0.940129	0.969158
[truncated: 562 more columns]

## Sheet: 388-388_inter_liposome
1	donor	77484.1	103294	95616.6	108818	73749.8	80121.8	80569.9	71084.2	88719	78735.7	86424.1	84562	98108.3	63869.3	83480.5	88781.2	72773.7	67288.9	78208.9	82524.7	83356.1	81714.8	71199.7	65824.1	75986.3	89285.1	90417.4	75798.5	82892.8	77565.4	91345.3	83777.5	80194.2	131011	126808	122049	112327	128038	141851	120086	125646	128293	130181	118499	115748	119801	121529	119566
1	acceptor	42570.6	28583.7	32013.7	30649	56445.3	39346.4	33465.8	39293.3	46633.5	41572.3	33983.7	45765.1	18899.3	50815.3	29658.8	25552.7	34683.1	44281.5	41339.1	31532.9	35753	30666.2	30703.8	50940.3	28158.6	29488.6	21097.3	53535.5	37468.2	43453.7	30515	33372.6	41142.7	-8813.45	4513.17	-6825.96	-7882.55	-2684.12	4798.26	-8328.03	2962.48	1040.63	-8821.42	-5302.03	-3756.56	-8225.69	7903.02	-5168.62
1	fret	0.355002	0.217002	0.251245	0.219567	0.433939	0.329199	0.293206	0.356163	0.344505	0.345676	0.282222	0.351512	0.162036	0.442685	0.262476	0.223406	0.323266	0.39731	0.345676	0.276094	0.300481	0.272384	0.301689	0.436127	0.269914	0.248737	0.189783	0.414086	0.311321	0.35964	0.249992	0.28467
2	donor	12808.1	18871.6	29428.6	12077.1	18521.1	20856.6	23839.7	32821.2	32290.6	27539.1	21178.6	25472.4	33229.8	29763.9	41147.9	32620.6	19341.9	16938	2773.22	11004.4	31651.1	44479.8	30261	27030.9	25841.3	32326.8	25488	31193.4	37164.1	34046.1	20541.8	16961.2	17374.3	12273.1	10532.8	12733.5	19684.8	19036.9	95929.1	123431	118666	119917	117955	124136	121789	122343	120734	116821
2	acceptor	99229.9	100573	74937.5	99411	88744.5	77976.8	94130.4	75641.1	74706.4	74594.2	91219.8	84463.5	58823.9	79789.8	63285	68535.3	98002.2	105732	114031	98113	83554.7	66389.7	82615.4	92101.8	81026.9	88357.5	83999.4	86640.2	64879.4	73046.2	101331	93395	86323.7	111026	114095	121302	109012	107214	38176.5	-4775.56	-3699.93	1060.5	-3142.83	-4104.44	-2725.74	-3910.32	1001.49	1872.42
2	fret	0.885873	0.842093	0.718359	0.892001	0.827681	0.789242	0.79752	0.69711	0.698002	0.730594	0.811469	0.76833	0.6387	0.727982	0.605634	0.677323	0.834908	0.86186	0.976055	0.898857	0.725364	0.598922	0.732332	0.773361	0.75813	0.732332	0.767485	0.734936	0.635897	0.681846	0.831701	0.846066	0.832504	0.900375	0.915454	0.904919	0.846859	0.849236
3	donor	35125.5	37663.3	38363.5	43820	30965.9	31111.6	39374.7	42153.4	36943.4	42380.3	34164.7	39142.2	38598.8	39878.9	43839.7	37839.7	45609.9	41483.9	40268.3	43565.1	37164.7	37047	48458.6	43764	43951.7	45976.9	41786.5	37775.3	37909.8	45948.9	45035.7	36632.5	37181.5	48632.3	48623.9	45918.1	45604.3	37315.9	40540	52878.7	40797.7	42315.9	48153.3	41366.3	52458.6	34175.9	43352.3	43257
3	acceptor	51465.1	52618.8	43829.1	44008.2	67808.4	50105	44320.4	53490.9	49721.6	49200.3	59674.2	37460.2	35534.3	52334.9	55030.1	50245.7	44733.1	44719.8	51569	41432.2	45094.2	55343	66017	53315.3	52624.1	48765.3	54941.1	39171.3	47090.5	41327.9	51892.1	45489.6	52807.3	50964.7	58647	53943.7	49419.7	58655.2	49859.3	40882	48400.2	56156.3	54007	59652.7	56623.3	41438.6	58932.3	72839.2
3	fret	0.594085	0.582458	0.532992	0.501471	0.686581	0.617063	0.529971	0.558922	0.573676	0.537011	0.635936	0.489088	0.479734	0.567793	0.556944	0.570737	0.495292	0.518839	0.561885	0.487015	0.548007	0.598902	0.57661	0.549003	0.545016	0.514771	0.567793	0.508647	0.553971	0.473465	0.535003	0.553971	0.586344	0.511712	0.547011	0.540018	0.519855	0.611353	0.551986	0.436373	0.543019	0.570737	0.528962	0.59022	0.518839	0.548007	0.57661	0.627474
4	donor	74179.4	51466.2	48428	59842.8	111115	47167.9	59245	46556.5	74152.1	77984.3	77700.8	53519.4	36390.9	33917	52622.7	46637.3	41124.4	59485.7	49703.6	75964.6	55562.7	55908	59269.5	44149.8	71109.5	61322.8	62979.9	79212.6	47017.1	46122.2	58421.9	50147	37609.3	39558.1	50233.3	36359.1	42808.8	57004.5	40896.3	72359.6	114808	116457	82963	37771.9	43004.1	37122.3	85228	105369
4	acceptor	53636.7	71909.3	75769.3	59591	17206.8	80861.4	69017.3	72858.1	52704.2	53439.1	36096.1	57442.6	84229.1	87528.5	80858.2	79358.2	85347.6	64868.4	72525.5	55685.8	67619.7	82138.2	65770.9	70245	37841.7	56251.2	43935.7	44863.4	70468.7	71212.6	72941	64145.3	68247.2	79825.6	69947.2	75992.2	69023.4	73561.1	67580.4	56341.3	18271.6	16101.2	45755.9	76131.4	74288.8	76234.9	47445.8	25945.8
4	fret	0.419498	0.582486	0.609929	0.499026	0.134219	0.631261	0.537802	0.609929	0.415595	0.406837	0.317378	0.5173	0.69865	0.720805	0.605686	0.63019	0.674517	0.521395	0.593003	0.423408	0.549151	0.595112	0.525486	0.61418	0.347426	0.47888	0.410725	0.361654	0.599335	0.606746	0.555365	0.561595	0.645217	0.669066	0.582486	0.676701	0.617373	0.563676	0.622705	0.438133	0.137645	0.121418	0.354995	0.667978	0.633405	0.672335	0.35785	0.197653
5	donor	4589.32	13146.3	12427.9	7360.25	9003.64	12156.2	4948.5	2054.24	2194.24	4320.15	2065.07	3156.77	6230.21	7876.1	8764.47	537.519	47319.9	133612	126883	86038.8	66665.6	60676.2	73489.2	63988.8	73604.2	68367.3	66025.6	61569.6	69493.2	75580.1	66698.1	68612.3	64024.7	73368.3	70967.4	69725.7	71042.4	73675	67617.3	70869.9	76467.6	62103.8	71001.6	37115.4	2092.57	8925.3	845.861	113.337
5	acceptor	56156.8	57487.8	59833.9	50511.6	53386	47285.1	49468.1	57018.8	52622.1	57676.2	57449.1	56694.1	56150.3	56256.5	65461.2	63788.5	33552.2	-4770.64	-1295.45	-3890.61	2006.56	2024.52	-1336.19	609.4	-304.074	-507.055	601.218	142.377	855.53	-2293.06	1467.95	-2439.94	-3728.32	-803.326	-1099.74	644.189	2257.42	-1082.07	-2097.28	-249.998	-1002.08	-2736.88	4770.21	-2413.01	3024.36	-1309.51	-722.117	1949.16
5	fret	0.923748	0.813327	0.828176	0.872322	0.855599	0.795989	0.90927	0.965102	0.960613	0.931044	0.965102	0.94723	0.900656	0.876535	0.882172	0.992341
6	donor	7824.8	3983.34	2782.76	3214.22	1450.86	4218.88	5900.94	7157.81	10105.1	3310.1	-1152.49	4075.06	13521.3	8227.08	3860.37	-333.34	-24.8566	3977.09	1534.24	-189.52	7197.41	6073.94	2486.78	8060.33	5850.92	506.652	6101.04	-3261.85	9296.35	125720	123419	106316	97558.1	117568	121211	117382	113526	123262	110469	118516	108309	36161.5	-1246.28	-229.123	-237.46	4095.9	-5254.48	-366.689
6	acceptor	104055	106145	115775	113682	107361	105469	112710	114066	119397	102914	114352	111165	108519	105130	112350	112864	118094	111645	112482	100271	102760	103354	98162.9	97445.6	107912	111435	111838	108411	103975	-1343.65	589.69	-2345.86	-3275.06	1093.2	-141.809	-356.915	-3852.08	-3059.3	-3098.74	-3812.5	6468.42	4243.6	4903.81	-6689.75	1197.29	-3933.25	3132.87	2380.53
6	fret	0.930615	0.964051	0.976376	0.973011	0.986485	0.961814	0.950646	0.940619	0.921741	0.968529	1.01015	0.96517	0.889725	0.927285	0.966289	1.00337	1	0.96517	0.986485	1.00226	0.935058	0.943959	0.975254	0.923958	0.948416	0.99549	0.948416	1.03056	0.918418
7	donor	27973.7	25109.9	27075.7	25177.3	27603.6	30626.9	26900	28440.2	22042.2	20993.3	24651.9	24790.1	26383.2	29220.5	23901.4	25979.8	24201.6	25130.4	27079.1	23802.5	55795.7	63317.7	75569.5	67823.2	73040.8	75172.9	79940.2	70786.8	72060.1	75858.6	69453.8	70449.1	75868	67464.1	74133.3	69470	72697.1	75557.5	71390.6	69684.9	78401.7	74257	72547.9	75266.7	73457	79410.6	73325.7	81562.3
7	acceptor	64511.8	65419.3	54982.2	70392.4	74560.1	70018.7	69247.9	76915.7	70052.2	74314.4	56631.8	69977.1	68934	75433.8	66465	69035.5	66513	66984.4	83139.5	76335.8	17363.6	4129.22	5780.89	410.035	1237	-5041.67	856.2	4547.76	6158.5	5664.39	2630.18	-3680.63	5158.97	7150.49	1562.59	3106.42	182.588	3407.23	3877.6	-235.696	4080.22	4098.92	586.692	-2868.07	-245.769	1054.49	-1476.46	514.585
7	fret	0.69728	0.722925	0.669996	0.736308	0.729641	0.695544	0.720393	0.729641	0.760869	0.780035	0.696412	0.738795	0.722925	0.720393	0.735477	0.726289	0.732981	0.727129	0.754386	0.762483
8	donor	17394.5	8127.47	11514.8	12596.1	7017.18	13841.5	10374.4	17287.2	31241.5	98453.7	97984	94323.8	111982	108244	114047	114284	107818	112259	96462.7	115507	122254	111109	117729	89182.6	-2285.19	-1041.29	-323.549	-552.758	-1243.02	-826.38	1543.25	992.241	496.938	2028.76	2008.06	1035.15	626.033	1342.27	1982.47	1233.87	-698.79	1381.78	1835.69	441.612	628.668	2887.27	2645.26	2042.31
8	acceptor	102356	93730.1	92727.3	96036.7	105188	107729	97109	99049.8	75593.9	1577.37	-4123.74	1915.8	-1488.85	-747.611	-1308.69	7971.82	1966.2	3444.76	-1988.77	-72.633	-540.184	-813.101	4153.78	-229.507	-5406.85	3373.88	184.243	983.956	-2978.12	3464.62	-937.022	-1639.2	378.803	-5116.51	2218.33	795.569	-1249.28	3119.31	-4820.68	6216.18	4506.85	-2864.22	-2868.15	961.313	290.227	-2652.12	2284.22	-279.182
8	fret	0.854581	0.920037	0.889695	0.884059	0.937462	0.886177	0.903622	0.851651	0.707836
9	donor	2433.48	1927.54	5538.85	3617.39	4606.79	5566.95	762.742	1576.75	-6277.74	3230.62	2021.98	3676.98	4365.06	1011.22	4980.06	2264.83	3750.06	1396.86	5202.67	5581.57	-2124.51	-427.91	914.525	2301.93	-1679.28	3120.44	1391.24	899.909	1647.58	3061.97	3978.29	1251.82	-3709.8	1944.4	251.177	-1761.35	-3518.66	217.448	-191.804	2677.46	-1297.01	1800.49	-2916.03	5456.77	-767.455	-5049.98	-1339.73	2878.71
9	acceptor	92029.4	90046.6	94783.2	86293.7	100240	98355	95947.1	94406	131939	89918.9	106197	93547.2	99497.9	90022	95339.2	90504.4	92710.4	87540.1	93003.9	89454.7	73821.2	93124.9	95684.2	85192.4	92017.9	89869.4	134287	76621.4	92994.2	94996.4	86087.3	89397.6	102058	90048	84938.4	82890.2	108347	79883.5	103337	103055	78230.8	93772.9	87691.6	86468.3	81354.6	89156.1	98020.3	92494.9
9	fret	0.974201	0.978921	0.944815	0.959967	0.955992	0.946416	0.992223	0.983627	1.04972	0.965516	0.981275	0.962347	0.957583	0.989102	0.950412	0.975776	0.960761	0.98441	0.947216	0.941608	1.03	1.00465	0.990663	0.973414	1.01852	0.966307	0.989883	0.988321	0.982843	0.968679	0.955992	0.985975	1.03761	0.978921	0.996893	1.02159	1.03381	0.99767	1.00155	0.974989	1.01699	0.981275	1.03457	0.940806	1.00929	1.06024	1.01391	0.969469
10	donor	27167	18140.3	23170.6	21071.9	22509.1	22692.6	21865	26019	23430.3	99513.8	205893	210135	206095	170186	161979	177443	163511	149355	168908	168621	155392	158221	164003	169421	171677	173942	163899	151158	155523	162037	155736	157805	148129	166649	162058	136225	178943	176077	172562	178832	173613	174596	169137	179050	172070	181370	171358	178569
10	acceptor	135757	147045	137210	136443	135709	133456	139018	134128	140389	87456	-7007.49	-589.992	-1520.37	-5044.64	-1973.34	-4278.87	-3251.93	-2682.73	-1492.66	-61.474	1700.82	-1890.29	-3795.17	-2854.74	-3321.89	-5948.47	-4933.32	-4914.43	-1567.21	-3107.95	-6448.17	2626.61	-3466.48	-3632.41	-3151.47	126.898	2228.95	-4993.81	-1545.72	393.531	-909.422	-2682.59	-3521.41	-4212.64	-8076.29	-3017.54	-4718.47	-5788.23
10	fret	0.833335	0.88968	0.855375	0.865852	0.857988	0.85407	0.864539	0.837202	0.856681	0.467563
11	donor	16400.4	11345.3	5939.99	16629.9	7037.66	15799.4	17371.2	10755	9473.08	11342.3	8906.88	21737.7	15221.2	15612.2	14359	18003.8	14846.7	23004.5	10880.3	9530.46	7612.92	17611.3	9072.97	14707.8	7907.35	10371.5	11419.3	11428.4	10918	15915.7	9826.39	8398.06	9986.44	13161.7	11777.1	10581.3	12121.4	23889.3	13009.2	20428.7	9500.26	14141.6	13480.3	12704.2	14878.4	10995	22140.9	26516.5
11	acceptor	35494.8	30196.6	34051.9	22342.6	37640.9	32729.8	32864.2	35565.5	30871.4	25558.5	25171.8	23264.9	34318.6	36583.9	26946.4	43741.5	30647.1	35554.9	29788	38383.6	24115.6	26741.4	30441.3	36547.6	27853.8	28677.5	27498.4	32715.9	29597.8	39148.6	39712.7	33791.6	28403.6	35418.5	28422.3	33257.2	29543	23081.4	19134.8	25148.8	29009.6	39373.1	14957	27074.9	20932.3	21841	32210.4	26897.2
11	fret	0.684115	0.727273	0.851733	0.57347	0.84195	0.674699	0.653846	0.767657	0.765522	0.692503	0.738925	0.516678	0.692503	0.700906	0.652806	0.708273	0.673654	0.607292	0.732565	0.80087	0.76019	0.603178	0.770861	0.713542	0.779417	0.734684	0.706167	0.741046	0.730447	0.711434	0.801956	0.80087	0.739985	0.729389	0.70722	0.759124	0.709326	0.491567	0.594962	0.552085	0.753799	0.735744	0.525755	0.680974	0.584714	0.665295	0.592911	0.503602
12	donor	6244.48	8661.45	17679.1	10688.3	18064.3	4399.25	2421.5	12938.4	2038.72	8364.54	7027.24	11110.3	10408.5	3518.34	8823.4	8965.72	5429.83	4669.16	5508.35	6511.95	-510.755	3022.68	6107.07	10857.6	7483.64	4254.47	3508.53	8065.18	14889.1	68874.6	68526.2	73021.5	77602.7	68737.2	62011.4	69232.9	73703.6	79717.8	73271.8	69468.4	72042.4	73980.9	77023.6	60399.3	79281.1	82132.3	76105.9	67395
12	acceptor	67810.7	67223.9	59083.7	83615.3	70894.3	61567.2	55398.9	65280.1	68378.4	57175.4	57589.5	57998.5	68418.7	67592.5	56257.4	58792.8	67241.2	54341.3	69832.7	73034.3	56273.7	65840.3	57824.6	60620	67929	59704.3	65076.8	48755.6	56240.4	-5593.61	-2480.83	366.891	1289.01	1799.99	-3390.53	-2902.21	-3258.34	-4920.82	2501.58	-1976.56	3846.51	3374.28	-3543.92	-1891.83	-5906.04	2599.56	371.727	-1545.58
12	fret	0.91548	0.886015	0.769506	0.887031	0.796813	0.933786	0.958214	0.83428	0.971456	0.872818	0.891093	0.839348	0.867744	0.950069	0.8647	0.867744	0.925649	0.920564	0.926666	0.91853	1.00918	0.956178	0.9043	0.848472	0.901252	0.933786	0.949051	0.857599
13	donor	24311.8	19433.5	20094	17038.6	16029.7	27186.4	29379.8	21914.2	18589.7	21420.2	20455.5	26146.3	23876.2	27865.1	17063.3	18147.7	22144.4	25088	18626.1	21376	17842.1	20891	14336.9	22134	18095.7	19948.4	23044.1	20668.7	20276	21923.4	20928.7	13898.7	29443.5	18754.8	23436.7	21231.7	18537.7	14998.7	16106.4	19330.8	19723.5	19232	27841.7	18857.6	19141	27892.4	23505.7	20159
13	acceptor	35820.6	41663.2	47968.5	30297.2	39702.5	35393.2	44459	37157.8	52731.3	36732.7	33451.2	40026.9	44409.2	44693.1	27335.6	43544.2	42612.9	35525.7	37206.6	47205.2	32784.7	39947.9	32551	38473.4	41408.3	48622.5	39743.4	34166.7	43670.8	42012.1	48943.3	52396.7	40655.1	44029.6	49632.8	43460.3	40579.9	45610.3	45050.6	37589.2	44502.4	48180.6	38149.1	39786	45333.5	44190.7	41365.9	39544.3
13	fret	0.595581	0.681669	0.70465	0.639585	0.711944	0.565347	0.602342	0.629169	0.739047	0.63202	0.620577	0.605233	0.649959	0.615795	0.615795	0.705563	0.658405	0.58588	0.666813	0.688132	0.647135	0.656531	0.694573	0.63485	0.695491	0.709212	0.632969	0.62344	0.682594	0.657468	0.700076	0.790346	0.580035	0.700992	0.678893	0.671468	0.686288	0.752452	0.736355	0.660276	0.692735	0.714672	0.578083	0.678893	0.702822	0.61292	0.637692	0.662146
14	donor	17516.9	7825.33	9712.74	6547.62	12533.3	6711.97	4336.8	3626.37	6669.56	5015.42	14765.3	14017.7	11170.7	11138.9	16170.2	15979.4	13370.9	18624.9	21339.4	9999.04	16827.6	8519.86	5847.79	9951.32	5073.74	980.817	9612.01	10810.2	16021.8	10534.5	413.534	11679.7	14659.2	12989.2	5047.23	17002.6	2232.02	17023.8	18450	9930.11	6616.54	5391.84	5391.84	22712.6	15661.3	10555.7	7830.64	13683.7
14	acceptor	27030.7	50060.5	35718	39466	59232.2	38215.1	37622.8	33572.8	50171.8	38504	49907.7	43039.4	45281.4	24483.4	51553.6	48187.3	40769.2	45867.8	43828.4	40447.7	38251.1	42760	49172.2	38037.1	54510.9	29406.9	40853.5	44357.6	40088	43197.3	44023.7	34553.5	35478.9	50177.8	50748.1	37338.4	50061.8	38572.3	44713.9	51412.4	38261.8	52694.7	46569	51453.2	37942.4	39822.2	51133.5	43575.7
14	fret	0.606236	0.864678	0.786611	0.858247	0.825192	0.850562	0.897202	0.902464	0.882816	0.884119	0.771912	0.75372	0.802682	0.687531	0.760945	0.751309	0.752514	0.710863	0.672544	0.80144	0.694495	0.834028	0.893267	0.792774	0.914361	0.968248	0.810152	0.803925	0.714391	0.803925	0.990276	0.7477	0.707341	0.794009	0.909063	0.687531	0.957337	0.693332	0.707341	0.837829	0.85312	0.907742	0.895889	0.693332	0.707341	0.790306	0.867258	0.760945
15	donor	16110.9	35070.9	40082.6	45936.4	52317.3	50708	46374.7	31937.1	43580.2	55562.5	48628.7	46101.9	40014.2	49115.1	33528	39467.5	47956.4	59253.1	61665.5	85539.2	78447.1	88419.5	93176.9	85578	87559.2	81977.3	89864.3	90264.9	75822.1	88915.1	90349.7	79638.4	84526.6	87078	88475.7	81651.3	77948.4	86596.7	80370	85562.7	76843.9	77947.4	77554	87891.3	78181.4	75932.5	73749	90424.3
15	acceptor	63238.5	41330.7	35414.9	49617.8	29810	22946.5	41039.9	44770.2	45091.1	38757.8	30947.5	38439.1	35491.6	40879	39610.9	36546.6	33708.3	17783.3	25526	2868.61	-6500.99	-7817.78	-5092.4	-3986.87	-2856.84	1561.75	-3919.27	1707.16	-5690.1	-3213.57	-5962.15	-460.339	-7452.37	-3789.21	-2216.5	-4239.21	2394.05	-4397.52	-7584.51	-2783.55	-2791.24	-3178.7	-5681.82	-2133.24	207.106	-850.019	-2148.4	-1171.26
15	fret	0.796778	0.540695	0.469231	0.519405	0.363266	0.311485	0.469231	0.583664	0.508305	0.41094	0.38848	0.454318	0.470227	0.454318	0.541712	0.481207	0.4129
16	donor	30928.6	37921.5	30226.7	32568.4	34742.7	18358.7	29771	28753.2	25038.9	30650.3	31144.8	30236.7	33116.1	20483	36012.2	32759.1	35761.6	31497.4	29623.6	27872.9	28398.4	29478.3	32704.8	30692.4	27953.8	37210.8	35395.7	30131.4	28573.6	25588.8	28683.4	30554.9	34559.7	28379.6	34997.7	26770.8	33750.3	22671.7	36140.8	39866.2	32913.2	28080.2	29634.7	23566.5	32190.3	28970.5	32433.2	35790.4
16	acceptor	46606.4	46332	33686.8	39767	47547.9	33595.9	37467.7	45348	34656.2	34653.3	34969.3	33838.5	28161.2	38435.7	40802.7	37116.9	43247.5	43841.5	40571.9	42110	37423.5	33220.8	35858.7	33575	38901.1	41153.1	43368.8	51179.3	30837.2	30022.8	41996.1	38388.4	40049.8	34707.5	40842.7	38107	47371.2	41053	38620	35526	35779.7	31686.2	37886	28079.9	39259.3	36880.9	28182.6	29635.2
16	fret	0.601077	0.549822	0.526951	0.549822	0.577496	0.646849	0.556758	0.61183	0.58045	0.530938	0.528945	0.527948	0.459603	0.652656	0.530938	0.530938	0.547839	0.581435	0.577496	0.602057	0.568621	0.529942	0.522961	0.521963	0.581435	0.524957	0.550814	0.629377	0.518967	0.539894	0.594215	0.556758	0.536911	0.549822	0.5389	0.587335	0.584386	0.643942	0.516968	0.470735	0.520964	0.529942	0.560716	0.543868	0.549822	0.559727	0.464667	0.452504
17	donor	2871.4	1528.8	1063.3	-842.8	4478.6	5078.85	10615.9	6360.2	5208.7	6230.35	4358.55	-2758.7	6134.8	3393.25	700.7	8675.45	3503.5	3679.9	-90.65	4128.25	3841.6	5110.7	10228.8	5439	5644.8	5350.8	4067	1310.75	8437.8	4027.8	7249.55	3307.5	3917.55	5157.25	9748.55	8513.75	4586.4	9608.9	5341	7487.2	2976.75	5243	2957.15	521.85	4730.95	7038.85	10905	7977.2
17	acceptor	41496.9	62515.3	51348.6	58449.7	62907.1	42419.3	55086.3	57365.2	52990	61387	45983.2	55154.1	54691.3	45212.2	52027	60632.4	59139.3	58461.7	53571	59399.7	54467.6	58272	52988.9	50951	58073.8	50459.8	57039	53063.4	54036.8	57574.3	47191.7	46223.3	47739.7	46188.7	44988.2	53333.9	68244.4	52455.7	46568	60407.2	51801.9	50397.5	56448.3	45037.3	53991.6	65869.3	62075.6	54222.2
17	fret	0.935235	0.976469	0.979411	1.0147	0.933269	0.892947	0.838751	0.899836	0.910657	0.907706	0.913608	1.05286	0.898852	0.930321	0.986276	0.875223	0.944076	0.941129	1.00196	0.935235	0.934252	0.919508	0.837765	0.903771	0.911641	0.903771	0.933269	0.975488	0.865371	0.934252	0.866356	0.933269	0.924424	0.899836	0.821977	0.862415	0.9372	0.845655	0.896883	0.889994	0.946041	0.905739	0.949969	0.988237	0.919508	0.903771	0.850586	0.871283
18	donor	24301.2	22826.2	26362.5	32199.6	28127.5	21046.4	24717.2	24351.6	27623.2	22256.7	20609.4	21527.6	26129.3	27585.4	28993.2	36168.8	24923.2	21447.8	34754.7	25517.8	21143.1	26101.9	24633.2	22292.5	40978.4	26871	24721.4	28982.7	25070.2	21649.5	39100	24481.9	29466	24435.7	26072.5	33336.4	26913	27499.2	23622.5	22162.2	26375.1	25503.1	30285.4	20538	30525	30964.1	51434	59038.2
18	acceptor	48441.7	42481.1	45767.9	54545.1	61286.6	53542.6	58672.6	54078.8	48432.1	55794.1	52633.9	47555.1	43874.3	61209.2	51305.2	49628.2	48364.7	57901.3	58722.8	54385.2	47609.8	52705.3	49106.6	55846.7	50961.9	39176.8	57378.9	56236.6	58977	56779.8	49394.3	52093.2	54422.8	64038.5	47040.2	50893.8	46815.8	49236.2	61909	60831.1	62872.4	53015.3	58243.1	51163.8	41621.3	39424.9	24365.8	17180.2
18	fret	0.665452	0.650308	0.63417	0.62913	0.685662	0.718055	0.703876	0.689708	0.637195	0.715015	0.719068	0.688696	0.627114	0.689708	0.639212	0.578811	0.660403	0.729203	0.628122	0.680609	0.692745	0.668482	0.665452	0.715015	0.554711	0.592885	0.698815	0.660403	0.701852	0.724135	0.55772	0.680609	0.64829	0.724135	0.643246	0.603952	0.635178	0.641229	0.724135	0.733259	0.704889	0.675555	0.658383	0.714002	0.576802	0.559727	0.321518	0.225791
19	donor	38031.8	32850.4	31287.1	35463	36540.1	34286.1	36836.3	35484.4	30939.5	36728.3	36425.1	31224.2	30232	32014.2	33777.9	37689.9	30933.7	29946.2	33950	31754.9	39094.4	34290.7	32475.6	35020.1	37070.2	82122.1	82594.5	77901.8	74908	84597.3	74959.4	76591.4	85228.5	88081.9	87565.1	85364.2	85162.7	82861.3	84830	89205.2	81526.2	79969.2	81263.4	88299.7	84255.4	86360.4	83684.3	86817.8
19	acceptor	49281.2	50936.7	50870.8	49629.8	48124	55218.5	51583.6	58420.8	46270	48345.7	56264.9	51143.3	37694	51913.9	44937.7	45372.6	44197.8	48799.9	49765.8	47875.8	42992.9	50486.3	51462.6	48072.3	49077	-5674.94	-8718.07	-3277.97	-4960.09	-509.497	-5554.8	-6945.58	-113.026	192.516	-8267.04	-2825.61	-2643.95	-757.392	1421.27	-5787.13	-4103.86	1648.44	-5860.33	-2319.57	-1413.97	-3889.75	-3189.95	-196.645
19	fret	0.564174	0.60821	0.618863	0.582842	0.568114	0.616927	0.583821	0.621764	0.599446	0.568114	0.607238	0.620797	0.55529	0.618863	0.571065	0.54638	0.588713	0.61983	0.594572	0.601394	0.523489	0.595548	0.613061	0.578922
20	donor	63707.2	78046	76167.2	61280	73096.3	81465.1	63154	25130	40274.8	36049.9	68981.1	59658.7	44332.7	55629.3	61198.9	65471.5	66706.5	63092	41714.8	59897.1	65504.9	63220.8	56134.8	68585.3	77588.3	58581	56955	77244.9	52992.3	77278.3	41781.6	31429.2	60703	55996.5	57074.2	81713	75404.3	67302.6	53249.8	59696.9	62004.8	68718.9	60936.7	56263.5	81946.7	73954.7	74536.4	65886.4
20	acceptor	49608.9	57944.9	60709.5	71983.2	46215.7	44286.1	35541.1	80090.6	102463	76136.5	50267.2	34953.7	64689.1	34495.4	49138.8	50563.1	37144.3	52286.5	58726.9	40474.4	58871	52850.6	37550.7	46130.1	42169.1	42954.6	37563.3	35233.3	41447.8	69140.7	62531.6	85007.1	38955.5	42135.8	65660.5	33325.5	44676.1	47070.2	55570.8	38347.4	50542.1	47599.1	30494.9	64209	46116.6	55323.8	42367	58072.4
20	fret	0.437464	0.426351	0.443519	0.539734	0.387831	0.352177	0.360344	0.761423	0.717811	0.678826	0.421294	0.369516	0.593313	0.382748	0.445536	0.435445	0.357281	0.453599	0.584414	0.40306	0.47372	0.455614	0.401031	0.402046	0.352177	0.42332	0.396972	0.313274	0.438473	0.47171	0.599242	0.730436	0.390879	0.429383	0.534754	0.28963	0.371553	0.411169	0.5108	0.390879	0.449569	0.409143	0.333775	0.532761	0.360344	0.428372	0.362384	0.468695
21	donor	60683.3	49359.1	87082.5	90890.9	93373.2	138681	99454.4	81208.6	75322.6	76554.3	67550.6	59104.6	54947	61374.1	55629.9	56674.3	53965.8	104324	65842.1	80718.6	32461.5	52887	62324.2	84062.4	84120.1	89578.2	68938.7	40825.5	44122.8	45413.3	45436.6	43080.6	33676.6	35965	33952.7	18325.6	25533.3	15128.2	17993	22659.5	16846.6	11096.9	36133.5	34151.2	15224.6	25588.7	45509.7	58305.2
21	acceptor	50805.2	73860.5	42276.3	45981	35902.2	20328.7	46716.4	45902.7	44214.8	46683	58677.4	62233.3	48415.1	53550.8	50087.9	48438.3	62484.3	30233	52561.7	31601.5	67932.2	52005.1	38235.3	27145.5	26234.6	23657.3	45122.9	57044.7	56330.5	72761.9	60921.7	63944.8	59815.7	51358.1	59317.4	67615.6	75426.3	53883.2	52551.8	70849	81624.4	88231.2	73189.8	73574.7	76065.9	68269.1	48224.2	35693.8
21	fret	0.456	0.599	0.327	0.336	0.278	0.128	0.32	0.361	0.37	0.379	0.465	0.513	0.468	0.466	0.474	0.461	0.537	0.225	0.444	0.281	0.677	0.496	0.38	0.244	0.238	0.209	0.396	0.583	0.561	0.616	0.573	0.597	0.64	0.588	0.636	0.787	0.747	0.781	0.745	0.758	0.829	0.888	0.669	0.683	0.833	0.727	0.514	0.38
22	donor	9188.34	5825.84	6842.07	7590.57	8596.73	6944.27	4384.97	6319.56	10171.5	9234.4	5545.15	8043.99	8190.82	8602.49	7688.46	6951.47	7358.83	9610.09	6050.39	9787.14	6565.7	10255	7286.86	11452.6	9764.11	6564.26	6506.69	7407.77	6487.97	6352.67	11857	6410.25	6987.45	10911.3	10298.1	9860.55	11066.8	8946.51	7481.18	8963.79	8487.34	9551.07	8418.24	10610.5	8277.18	4729	6534.04	4734.75
22	acceptor	94403	92221.6	93776.1	86455.8	91515.5	94599.7	100084	90647.7	94786.5	97034.2	90847.9	89496.9	99671	96375.4	89437.4	96062.3	103200	96449.3	103026	98287.8	96013.2	109031	94660.8	89950.8	101766	104320	87966.6	98508.2	90110.3	89149.6	102697	86560.2	94162	99338.2	91949.2	91594.3	92003.7	95923.6	92545.6	92647.2	79290.6	90135.4	85754.6	95463.2	97864.8	85889.6	92062.2	96595.7
22	fret	0.911413	0.9402	0.93197	0.919633	0.914495	0.93197	0.957704	0.935056	0.903198	0.913468	0.942259	0.917578	0.923744	0.917578	0.920661	0.932999	0.932999	0.909359	0.944317	0.909359	0.936085	0.914495	0.928885	0.886781	0.912441	0.94123	0.930942	0.929913	0.932999	0.932999	0.896014	0.930942	0.930942	0.901145	0.899092	0.903198	0.892935	0.914495	0.924772	0.911413	0.903198	0.904225	0.910386	0.900119	0.921688	0.947406	0.934027	0.953584
23	donor	84971.3	99079.5	87802.4	85443	91550.4	90597.2	92698.8	75555.5	91975.8	92300.9	70021.1	43302.3	48152.3	37829.5	42040.4	46206.1	84434.6	73779	88773.3	101108	94930.4	92143.3	90408.7	43383.8	40419.3	90241.2	52284.9	90840.7	17818.8	37299.5	45853.5	49539.8	101313	46770.4	47638.8	49765.7	33755.3	47231	46362.6	67908.5	58766	84608.7	42094.4	40616.6	36592	48257	79458.9	83669.8
23	acceptor	1263.3	13382.6	12681.1	14655.8	10706.3	15239.5	6279.44	5252.44	8463.67	11521	10707.8	52459.8	51493.1	48515.8	45661.9	41741.4	20769.9	32684.6	7694.14	14577.6	12049.8	13049.1	12910.9	43911.1	43172.1	7801.63	35975.1	18857.5	68687.5	57695.4	46298.2	54576.6	3672.92	44809.5	41693	45093.9	41973.5	46676.2	36817.4	19441.2	36030.8	29332.1	52644.3	35573	42766	37125.4	15244.9	11855.4
23	fret	0.0143735	0.119098	0.126477	0.146833	0.104377	0.144051	0.0632368	0.0650571	0.0842159	0.110811	0.132944	0.548206	0.516894	0.561401	0.520922	0.474808	0.197198	0.307354	0.0796467	0.125554	0.112651	0.123708	0.124631	0.502822	0.516894	0.0796467	0.407477	0.171944	0.793748	0.607366	0.502822	0.523946	0.0351188	0.489794	0.466835	0.475805	0.554291	0.496805	0.442999	0.222596	0.38004	0.257638	0.555306	0.466835	0.539088	0.435082	0.160766	0.123708
24	donor	31658.2	23670.7	28453.8	23363.8	27936.1	29384.8	29757.2	29486.1	26985.6	23850.8	35366.9	25820.3	37215.7	23942.9	33224.5	35405.8	34907.6	29402.2	33854.8	28224.6	30050.9	33331	33617.4	33037.3	35910.2	34708.1	34841.1	21723.8	26232.6	28175.5	34615	30098.9	33414.8	29069.7	26581.5	26606.1	28669.7	33168.3	36727.7	32291.5	32750.8	37087.8	31182.4	28432.3	25103.1	30164.4	27410.2	33820
24	acceptor	48801.4	46238.4	44679.2	45976.2	45741.1	41488.9	52262.6	50473	42325.5	53202.9	45641.1	43282	49962.1	48829.3	46678.3	50722.8	51266.1	51002.4	45242.5	48809.6	36559.3	37873.3	47110.7	43888.7	43382.2	40646.9	45181.9	47353	41742.5	42571.8	50912.6	40909.6	50470.1	43495.2	40303.8	36150.6	43775.5	36172.4	43321.1	46646	52880.6	43587.9	45682.9	44659.9	36721.6	41688.6	43841	39194.4
24	fret	0.606128	0.660939	0.611114	0.66293	0.621084	0.58518	0.637031	0.631052	0.611114	0.690803	0.563222	0.626068	0.573205	0.670896	0.584182	0.589171	0.595157	0.634041	0.572207	0.634041	0.549242	0.532259	0.583184	0.57021	0.547244	0.539253	0.56422	0.685826	0.614106	0.602139	0.595157	0.576199	0.602139	0.599147	0.602139	0.576199	0.604134	0.521266	0.541251	0.591166	0.617097	0.540252	0.594159	0.611114	0.594159	0.58019	0.615103	0.537255
25	donor	-373.2	4051.29	5444.57	4911.73	7788.48	3461.43	3216.78	3755.84	-1629.64	4593.47	73.6037	5673.68	5524.4	8152.35	3325.63	4929.35	187.636	5206.14	6659.55	4370.59	1375.66	6003.34	-1079.17	5292.18	2652.83	4669.15	4207.83	4392.36	1383.95	3987.02	3968.36	6386.9	-870.8	4284.54	1521.83	4288.69	-290.266	2601	2656.98	8803.37	5868.57	3654.25	7109.46	2401.96	2902.67	308.926	4170.51	5011.25
25	acceptor	49005.7	59709.3	49578.4	52570.8	53214	50979.1	47937.9	56870.9	47605.6	46012.9	59339.7	55580.5	56072.2	53898.5	49660.1	53889.8	58264.2	58155.9	53130	58038.8	42502.3	50692.7	55051.3	50072.8	50909.6	57227.8	53012.1	49196.7	44536	56872.9	52811.4	52432.8	63568.7	63217.8	59605.8	55651.7	53039.4	61771.7	52375.2	53737.7	56142	49414.1	46773	51603.7	58583.1	57190.7	57415	50890.2
25	fret	1.00747	0.936122	0.901189	0.914382	0.872643	0.936122	0.937336	0.93855	1.03507	0.909577	0.998756	0.907177	0.910777	0.869098	0.937336	0.916789	0.996271	0.917993	0.888065	0.930065	0.969089	0.894022	1.01998	0.90478	0.950721	0.924021	0.926437	0.917993	0.970318	0.93491	0.930065	0.891637	1.0137	0.936122	0.975241	0.928855	1.00498	0.959276	0.951941	0.859668	0.90478	0.931275	0.867917	0.955606	0.953162	0.995029	0.932486	0.910777
26	donor	45701.1	81454.4	38704.8	43964.5	70963.5	63645.6	60587	54455.4	49731.6	71642.4	67676.2	53354.8	66289.8	41406.1	79460.5	69419.9	70599	60472.6	75380	47158.9	59700.8	66425.6	90980.5	64610.4	66418.4	73800.6	64496	70384.6	72135.5	63395.5	62352.1	51711.2	73136	58421.6	63845.7	54655.5	59865.2	42478.1	52354.3	42956.9	82790.8	56649.3	73822.1	69920.1	72378.5	61165.8	70348.9	57549.8
26	acceptor	75660.7	75315.1	64195.5	69591.8	116904	65640.7	54248.3	98886.4	85570.8	89404.6	62354.5	90705.9	83752.7	87021.4	86876.4	72107.7	78370.9	67324.2	70970.6	81925.6	84074.9	83693.2	81917.7	83506.9	75782.3	54424.1	80001.5	97043.9	75661.2	83111.1	78044.3	107199	95004.2	62218.4	66335.8	74100.7	82802.4	74191.7	78847.1	67965.3	62621.9	85355.6	65279.4	56655.4	94095.2	77825.2	80018.5	80632.8
26	fret	0.623591	0.480456	0.623591	0.613285	0.622559	0.507507	0.472473	0.645311	0.632886	0.554997	0.479457	0.629786	0.558045	0.677568	0.522607	0.509517	0.525634	0.526643	0.484453	0.634955	0.584556	0.557029	0.47347	0.564149	0.532703	0.424879	0.553981	0.579446	0.511528	0.567204	0.556013	0.674436	0.565167	0.515554	0.509517	0.575361	0.580467	0.635989	0.60095	0.612256	0.430799	0.60095	0.469483	0.447619	0.565167	0.560079	0.531693	0.583534
27	donor	16006.8	24414.2	16841.3	17520	21617.3	21378.4	19115.1	26005.3	25089.6	17898	21003	31224.5	19391.3	19847.8	26185.6	21471.5	22874.3	23212.4	20482	18642.7	27304.3	18640	21312.5	18602.7	18121.6	21669.8	26697.4	26151	19616.2	24466.8	26602.2	22932.2	19490.5	18327.9	34189.8	23572.4	26367.3	23827.9	25177.5	19440.5	25476.9	22976.8	22897.6	19787.2	21276.5	22628.1	21488.2	22153.6
27	acceptor	66367.1	77678.3	78114.1	82123.2	72951	55914.3	69743.6	79998.7	78708.4	65920.9	68105.6	58441.1	74657.9	72304.7	79871.2	89925.7	85714.2	79623.8	98209.9	91238.2	85818.2	79483.9	67351.1	90348.2	73489.8	79331	90745.8	68075.9	76434.3	76712.6	74410.1	63446.3	73843.2	78043.2	74087.9	82319.3	63216.7	75565.3	72814	64003.6	73836.8	72328	81875.3	85156.9	85891	74358.7	83647.1	69087.5
27	fret	0.806013	0.76058	0.822621	0.824114	0.771773	0.723583	0.785168	0.754928	0.758162	0.78673	0.764594	0.651877	0.79376	0.784386	0.753307	0.807537	0.789104	0.774152	0.827093	0.830061	0.758969	0.809817	0.759775	0.82932	0.802192	0.785168	0.772566	0.722743	0.796041	0.758162	0.73692	0.734435	0.791435	0.809817	0.684104	0.777314	0.705764	0.76058	0.742691	0.766994	0.743512	0.758969	0.78125	0.811334	0.801426	0.766994	0.795306	0.757355
28	donor	33609.3	26036.5	34674.6	30405.6	35142	27668.3	27805.7	21052.7	24464.6	25990.3	23158.7	24957.4	24945.7	29851.9	28970.2	28121.9	30067.9	28306.5	25060.5	18100.3	22011	28824.9	30718.8	30091.4	33802.8	30554.9	30524.4	27834.2	24984	26926	35798.8	28771.9	25271.6	32379.1	34094.4	25963.8	33822.4	26544.1	34667.8	30810.1	25202.9	26507.8	28486.1	39520.9	28460.6	34573.5	28628.5	33260.8
28	acceptor	54633.3	40692.7	42601.2	47537.5	40569.9	42628.4	49308.9	43547.5	55443.7	42365	41684.4	41679.3	47449.2	43051	49498.1	40187	47193.2	48516.6	48928.7	38618.4	42358.3	38293.1	38756.7	44805.9	42905.1	47878	44043.4	40041.2	45965.7	43405.5	38366.8	33948.1	53746.8	48189.8	41372.8	43448.3	45725.2	41719	41898.3	42085.9	38913.7	41415.8	52753.5	44206.3	40999	42983.9	49872	51450.5
28	fret	0.619376	0.609896	0.551651	0.609896	0.536263	0.606744	0.639498	0.673729	0.694258	0.619376	0.642689	0.625714	0.655477	0.591036	0.631007	0.587906	0.610948	0.631007	0.660841	0.681274	0.657629	0.570235	0.557832	0.598355	0.558863	0.610948	0.591036	0.589992	0.648002	0.617266	0.516888	0.541383	0.680195	0.598355	0.548567	0.625714	0.574383	0.610948	0.547539	0.577497	0.606744	0.609896	0.649069	0.528092	0.589992	0.55371	0.635249	0.607794
29	donor	-2400.35	666.534	2385.82	7473.07	4595.14	1858.4	9240.11	2489.64	-2049.44	-500.42	-2275.77	-4061.49	-3106.34	-8010.86	-1632.07	-1428.58	-2184.4	4038.65	1654.91	-4765.4	3249.61	6630.04	-7255.04	-4798.63	-961.387	-4599.29	6528.29	-1862.56	2697.28	-6773.31	-11117.2	-741.285	-2188.56	-4717.65	-6505.45	8191.51	-1441.04	5012.5	-529.489	-917.782	1243.78	-681.068	9015.85	-5978.04	7894.58	118.357	166.114	-2836.4
29	acceptor	65632	54822	51465	55296.3	73046.8	54519.1	58387.7	60247.8	57444.2	62036.7	56073.4	55527.3	54280	58017.2	61400.8	54074.7	69463.6	56772.7	71585.7	70185.2	44780.2	49650.5	61602	60989.9	66054.4	58724.8	60645.5	65662.6	59705.5	61800.6	66329.5	51553.8	51109.4	69238.6	58313.2	59244.3	60256.9	43178.1	66070.4	52478.5	49913.3	54448.5	50958.5	45894.2	54996.2	50067.3	59348.7	61317.6
29	fret	1.0375	0.98819	0.956174	0.880356	0.940416	0.967738	0.86402	0.9605	1.0375	1.00738	1.04206	1.07905	1.06045	1.16062	1.02691	1.02691	1.03295	0.933307	0.97793	1.07282	0.931889	0.881726	1.13296	1.08529	1.01489	1.08529	0.902422	1.02993	0.956174	1.12332	1.20211	1.01489	1.04511	1.07282	1.12492	0.878988	1.0239	0.895491	1.00738	1.01789	0.975011	1.01335	0.849203	1.14917	0.874891	0.997039	0.997039	1.04817
30	donor	65908.2	56455	56174	53201.2	43494	51908.3	48399.3	53408.2	49190.6	34250.2	40866.3	34258.9	43633.3	47055.9	43370.7	42998.5	47406	43252.4	48511.5	52254.6	51215.6	53976.4	50134.7	52644.1	43612.3	57890.8	58964.3	59124.6	62845.5	51539.8	41466.5	54989.5	51386.9	46249.9	52147.4	52822.8	57958.6	68131.7	57924.1	46109.4	44688.3	47558.8	39239.4	44549	39315.8	47435.5	50868	42923.4
30	acceptor	37676.1	40543.2	28254.6	36645	19202.3	23236.9	24688.4	37820.2	38532.9	42138.6	32688.8	31610	40080.6	28589.8	33673.6	35525.6	31373.7	28128.4	32093.5	26464.4	33035.2	31516.1	32677.6	36459.3	36755.2	37238	38710.4	43245.6	36794.2	25597.1	44406.5	21420.1	19939.6	30131.6	29340.9	24656.2	32702.9	37347.8	32233.8	26393.1	44740.5	38074	32648.5	41208.3	42523.1	41669.8	30712.5	42775.2
30	fret	0.363701	0.41762	0.334672	0.40819	0.306395	0.309674	0.337914	0.414481	0.439482	0.551876	0.444659	0.479571	0.478551	0.377557	0.437409	0.452919	0.398724	0.394514	0.397679	0.335753	0.392401	0.369039	0.394514	0.40924	0.457038	0.391336	0.396624	0.422843	0.369039	0.331426	0.517	0.280007	0.280007	0.394514	0.360492	0.318398	0.360492	0.354062	0.357279	0.363701	0.499875	0.444659	0.453949	0.48059	0.520009	0.467307	0.376494	0.498864
31	donor	4257.28	-65.4371	11489	17790.4	17418.2	29177.3	33696.8	126670	124509	127768	129263	125987	139577	134213	113438	117652	116029	120525	125198	120975	108488	114828	97582.6	111345	107016	105996	111801	112010	118700	13292.2	-841.5	-2088.14	-1084.7	-1616.08	-1624.98	837.169	-3531.03	567.771	866.827	-632.408	150.576	-3761.87	187.155	-2802.91	88.2925	-1699.62	-256.734	-313.58
31	acceptor	105883	116556	109947	104153	111674	78462.2	80412	3022.64	-3916	-548.368	1159.73	522.769	4998.67	3136.32	-3243.98	2230.84	82.267	1641.87	-660.784	-592.777	-2053.34	1204.29	-2518.61	-4918.84	-3086.07	122.014	-3332.96	953.864	1032.78	208.283	7.885	-1404.07	243.558	912.606	-701.571	-4686.55	623.07	-1147.83	2977.71	-2242.4	3076.72	-2002.33	-1451.28	401.344	6.793	1134.8	-1054.49	-1572.3
31	fret	0.961733	1.00078	0.905741	0.854379	0.865095	0.728673	0.704355
32	donor	6245.27	5788.68	1210.16	2595.77	5191.53	-1343.33	3953.89	7692.18	22065.1	4949.5	3220.4	4005.68	-374.145	-779.998	-87.7234	3543.81	1351.79	1607.56	2893.81	2223.73	5715.76	5099.58	318.13	3127.39	5228.52	3290.15	4616.57	3107.31	8680.38	4866	219.837	515.771	1964.79	4515.11	1024.14	2589.42	-1731.22	7437.46	-2958.29	-1884.47	953.331	3973.97	-3093.57	3684.38	4935.76	-1297.88	3341.94	2144.47
32	acceptor	52657.5	59937.6	69069.8	66514.5	56079.7	58321.9	50874.5	46461.7	68839.1	55963.4	58001.7	63211.3	59323.8	60082	65249.2	46585.6	67882.7	70920.4	63549.8	66049.9	64365.3	57868.1	57477.5	64546.9	58281.3	61445.8	59709	67873.5	59216.8	56836.4	64007.4	57770.4	54955.3	41746.9	68315.2	53124.1	59362.8	65906.4	68700.8	51928.8	55738.2	48695.5	51861.8	72616.5	61566.6	55728.3	66387.6	52994.9
32	fret	0.893504	0.911663	0.982973	0.962117	0.915481	1.02359	0.927879	0.858032	0.757541	0.918344	0.947867	0.940258	1.00662	1.01322	1.00095	0.928831	0.980132	0.978237	0.95642	0.96781	0.918344	0.919298	0.994328	0.95357	0.91739	0.948818	0.927879	0.95642	0.87243	0.921205	0.996219	0.991491	0.965913	0.90211	0.984867	0.95357	1.03019	0.898286	1.04524	1.03772	0.982973	0.925019	1.06308	0.951669	0.925972	1.02359	0.951669	0.961167
33	donor	9431.6	8938.43	4695.4	8965.5	6006.5	11201.3	4363.11	7688.98	8666.29	7773.18	16474.3	6869.54	10881	2671.61	765.104	5388.54	8759.51	5054.75	4304.47	4973.56	3375.28	5072.79	10971.2	9559.4	4530.01	7454.42	7245.43	7320.61	9000.08	8515.93	4284.93	4830.72	3489.55	9870.64	5687.74	6892.09	6135.8	6000.48	7959.62	5510.33	7637.86	7667.93	11876.4	10022.5	58109.2	56425.2	52400.2	36766.2
33	acceptor	46433.2	45443.3	48825.4	49126.2	47333.1	44900.5	49077.6	56999.9	50537	42593.5	47904.8	52735	48022.7	45420.2	52703.3	52381.7	48284.8	43057.3	42057.9	53236.1	41612.6	54538.3	53141.2	61215.7	41469.5	42936.9	46366.6	45136	54825.7	44024.1	46519.3	47481.9	40015.9	42849.1	56180.4	43239.5	47019.6	38448.3	40912.9	48785.9	47155.7	47005.7	38458.6	40357.5	4010.14	416.342	-859.81	261.926
33	fret	0.831431	0.835758	0.912095	0.845262	0.887813	0.800005	0.918742	0.881062	0.85383	0.845262	0.743842	0.88444	0.814905	0.944292	0.985619	0.907095	0.846123	0.894541	0.907095	0.914591	0.925367	0.914591	0.828831	0.864937	0.901246	0.852116	0.864937	0.860673	0.858964	0.837486	0.915422	0.90793	0.919572	0.813158	0.90793	0.86238	0.88444	0.864937	0.837486	0.898734	0.860673	0.859819	0.763618
34	donor	120552	166334	170483	129446	170551	162991	143024	130123	114677	123057	107232	103970	117371	141731	131389	176879	159518	126028	137907	142753	140594	156486	157779	135721	163133	129020	150327	148696	110779	151626	105987	145961	147707	148208	162706	165813	138875	163383	139091	161664	144601	162402	146171	129209	135707	149636	163437	165989
34	acceptor	37976.9	39823.9	41802.7	39135.4	29073.1	34666.2	42542.1	66832.1	57879.7	48010	54207.7	46497.5	62842.3	55484.2	55050.4	42482.8	52796.1	34686.4	41390.4	28082.1	51839.6	43553.1	37029.7	38203.7	35008.9	37521	39288.8	50453.2	39197.8	30910.7	43117.9	22933.5	48575.1	39084.1	29150.5	31397.2	26647.6	31066.6	49650.5	49920.5	32576.6	42874.2	36294.2	61480.4	38536.2	31465	30210.1	32130.7
34	fret	0.239142	0.193222	0.197409	0.231857	0.145942	0.175399	0.229774	0.33931	0.335208	0.280624	0.336233	0.309515	0.34853	0.281658	0.295085	0.193222	0.248497	0.216222	0.230815	0.164893	0.269242	0.217263	0.19008	0.21935	0.176448	0.225606	0.206821	0.253689	0.260951	0.169097	0.288891	0.135392	0.247458	0.208911	0.152266	0.159634	0.160686	0.159634	0.263025	0.236021	0.183793	0.208911	0.198455	0.322887	0.221436	0.173299	0.156477	0.161738
35	donor	46856.7	45480.7	51458	58477.9	38770.8	53765.4	46722	31798.1	36515.6	42172.9	48727.9	44298.4	51026.9	46117.4	53822.7	44143.4	44468.5	46423.9	46434	51062.2	47816.7	51776.3	42647.9	51351.9	45704.7	47426	41684.5	47867.3	44271.4	50487.9	65295.6	101882	90599.3	93711.8	104144	93629.2	100199	108033	103687	90526.9	95586.3	93444	99357.3	96551.4	98520.2	96918.5	105813	91993.9
35	acceptor	43155.7	37946.8	47793.4	47054.7	58277.9	40796.3	48267.3	60049.6	51668.1	50373.8	41141.2	49383.8	42233.7	44333.3	41976.1	46010	40727.5	46251.5	44527.7	42545.2	43876.6	45724.8	37492.1	34509.6	32231.7	42790.5	38098.4	38261.1	44698.6	38546.7	33956	-6692.96	4230.71	2164.96	214.932	-554.633	-870.819	547.608	-639.44	-1092.21	1778.78	640.507	1.068	305.877	-1030.7	-892.409	2636.1	3995.62
35	fret	0.479503	0.454605	0.4815	0.445671	0.600735	0.431805	0.508539	0.654169	0.585423	0.543798	0.457586	0.526644	0.452618	0.490497	0.437743	0.510547	0.478505	0.49951	0.489497	0.454605	0.478505	0.468533	0.467537	0.40222	0.414033	0.474514	0.477507	0.444679	0.502518	0.432794
36	donor	18778.8	16958.9	13245.5	10604.2	16297.5	21019.9	16450.3	9486.83	12307.2	15160.1	13594.1	19183.2	14638.8	12266.1	16099.6	19932	14489.3	13215	10513.6	13529.9	20108.9	19189.5	14356.6	121320	127802	163790	123755	59267.1	5584.91	1062.68	3851.42	2489.7	5889.27	8864.42	4300.06	1518.7	7122.51	11639.5	12847.4	8452.63	8919.18	7857.61	4535.97	2444.41	-1414.33	-25.2227	-2332.67	-1382.73
36	acceptor	106451	112180	108613	110886	113055	93277.4	97272.9	115839	109247	120084	101780	107977	108513	114102	106442	114312	104112	107850	113879	104790	106029	111903	112986	25630.2	4344.26	134.156	266.819	179.24	-510.395	6535.99	623.36	5133.69	4790.76	-1413.07	2871.41	3796.9	4797.18	2722.46	3553.39	3392.88	1351.59	4856	-928.952	-7178.98	3717.78	-813.986	-1972.49	610.483
36	fret	0.850031	0.868421	0.890999	0.912513	0.87365	0.816399	0.8553	0.924477	0.898766	0.887539	0.88234	0.849152	0.881473	0.90307	0.868421	0.851789	0.877999	0.890999	0.915082	0.885808	0.840358	0.853545	0.887539
37	donor	58822.6	56701.3	47606	33957.7	53644.4	48781.9	52303.5	63795.4	60405.4	63109.4	64112.6	58177.6	55461.5	51584	60754.6	38780.7	45919	44264.7	53569.9	36934.7	34048.2	51091.1	56235	34451.4	50476.5	53197.2	43521.6	25616.2	35471.3	38723.7	38915.3	52826.8	45401.8	67349	65682.5	49487.7	53587.4	46757.2	43764.2	48890.7	52019	59406.8	57455.1	65267.2	42900.1	56262.4	60096.6	62980.8
37	acceptor	41482	38640.7	42921.1	60406.8	52627	55632.6	45553.8	42690	36652.3	37955	34205.1	45010.7	37813.6	42878.3	47950.7	46787.7	54574.6	46254	48416.9	51601.2	66374.6	43597.7	38394.4	68912	44437.2	44723.9	60895.4	68708	63763.7	57452	51130.6	38683.1	39250.5	31121.4	34591.1	43094.9	46988.2	51585.5	51241.6	42315.5	44001.3	40493.5	37129.9	32646.7	54289.4	40182.9	26759	41882.3
37	fret	0.413925	0.405153	0.474176	0.64018	0.495245	0.532785	0.465198	0.401264	0.378053	0.375166	0.347429	0.436478	0.405153	0.454267	0.441407	0.54713	0.543023	0.511413	0.475175	0.583336	0.660471	0.460223	0.406126	0.66691	0.468187	0.456251	0.583336	0.72886	0.642309	0.596911	0.567758	0.422726	0.463207	0.31623	0.344577	0.465198	0.46719	0.524612	0.538923	0.464202	0.458236	0.405153	0.392535	0.3332	0.558456	0.416855	0.307787	0.399322
38	donor	7926.34	16032.5	21170.1	3363.26	12006.2	1342.23	6312.97	5058.48	10370.8	14831.6	1641.29	5793.55	-3304.28	3989.72	1490.18	5174.96	14162.6	7241.64	11112.2	8779.46	9534.99	4148.7	8795.2	2366.91	7699.68	7975.14	18859.5	10822.5	7353.4	3637.14	1929.33	9105.28	11036.6	11973.1	9155.65	12275.4	11249.1	3160.22	8927.42	4062.13	4202.22	1309.17	9782.11	2420.43	7027.58	15357.3	1979.7	5859.66
38	acceptor	43862.3	31855.3	46694.7	47893.6	56367.3	50364.5	45753.2	58712.3	47954.9	37365.7	48990.4	48918.1	53950.7	63793.4	67457.7	46945.6	49887.7	42246.5	35343.1	47902.9	34727	63043.5	55457.8	52380.9	49874.7	64016.2	64136	43923.3	43293.8	42638.5	57677.4	49867.8	42119.3	55548.3	43670	48700.6	53622.5	51890.2	54252.8	54496.2	75759.5	66660.9	58709.2	54944	73577.3	48143.5	58429.9	62706.4
38	fret	0.84736	0.664955	0.688256	0.934821	0.824812	0.974099	0.879194	0.920378	0.82174	0.715665	0.96789	0.893595	1.06548	0.941015	0.97824	0.9008	0.778805	0.853516	0.760444	0.845309	0.78493	0.937918	0.862754	0.956514	0.865835	0.889479	0.772682	0.8023	0.854542	0.921409	0.96789	0.845309	0.79208	0.822764	0.82686	0.798211	0.82686	0.943081	0.858648	0.930693	0.947213	0.980311	0.857621	0.957547	0.913162	0.758406	0.966855	0.914193
39	donor	21086.2	18150.1	19985.8	19926	17498.1	24635.8	21947.9	14860	11192.6	8995.62	9395.94	10648.9	10311	10749.4	10327.4	11407.1	12630.1	11439.1	12622.3	10723.8	12502.3	17397.1	11795.3	13824.6	11078.7	12969.4	92672.8	91918.5	98212.7	95362.4	92011.7	97834.5	94128.9	86501.2	89807.3	94084.7	95949	98986.9	98733	93395.9	96436.8	100777	99966.5	103624	97311.1	93999.8	101625	105823
39	acceptor	81527.5	86924.6	88690.2	82549.7	86926.1	88686.8	82073.5	82699	91829.9	91317.4	94066.1	85614.7	80911.5	84759.4	88742.5	98412.6	84600.3	91568	92557.5	93245.6	89653.2	93321.6	88965.1	83984.4	87600.5	86641.7	3205.48	-6522.03	-1841.93	-5083.65	-2407.81	-8700.85	-4541.11	-2975.32	-514.872	-2792.18	-5075.26	-4876.62	-3132.2	-1412.33	-1475.97	-9971.65	-3741.97	-4009.67	-6834.94	-282.956	-2769.57	-8902.4
39	fret	0.794238	0.827373	0.816164	0.805658	0.832144	0.782706	0.789309	0.847908	0.891682	0.910362	0.908879	0.88942	0.887153	0.887153	0.895443	0.896194	0.870388	0.888665	0.880324	0.896944	0.877276	0.843201	0.882605	0.858815	0.887909	0.869621
40	donor	5443.61	11075.2	5871.65	7339.53	6446.7	5793.82	6928.79	5534.4	294.12	7955.66	6345.09	-964.067	10240.7	4732.36	2014.94	7696.24	897.271	5175.54	5207.97	1792.27	2151.13	2972.63	7534.1	4604.81	5901.91	7800	5501.98	5512.78	6652.07	7570.85	60369.3	73809.4	58244.2	56679.1	47806.9	32959.4	62524.7	56882.3	65974.9	68990.7	59428.9	65417.2	63142.9	61167	64617.3	59988.8	52316.5	56173.2
40	acceptor	63959.3	55931.5	58994.3	59429.1	52541.1	49446	61863.8	71637.8	62478.2	75029.6	65521.4	64224.2	61232.7	61063.8	65686.3	59114.5	72879.3	74199.5	51204	78040.2	65663.9	62249.4	72577.8	67857	61698.8	47692.3	69445	65467.4	60374.8	59202.5	11705.6	3921.91	-4818.93	-3876.33	8191.63	2086.53	2665.04	-536.059	-3009.33	11746.2	1475.72	3843.25	-5368.93	6975.84	948.721	-3135.9	-7449.85	-8863.34
40	fret	0.921848	0.834754	0.909797	0.89033	0.89033	0.895218	0.899281	0.928239	0.995415	0.904142	0.911408	1.01519	0.85654	0.928239	0.969965	0.884609	0.987746	0.934606	0.907376	0.97772	0.96841	0.954345	0.90576	0.936194	0.913019	0.859036	0.926644	0.922648	0.900903	0.886246
41	donor	29311.4	37213	31625.2	36135.5	36600.5	33148.8	29579.8	33190.3	26343.6	24071.4	27016.5	48566.3	37689.3	44112.6	28619.5	28850.2	29504.2	73140.5	80157.4	86951.2	96092.8	91314.1	89979.5	78785	68376.9	95582.4	87420	87117.6	74611.2	94240.3	78921.1	84554.3	78399.4	61613.3	87302.8	82259.4	81420.1	89208.3	85548.6	76149.9	78176.3	76036.5	80448.5	80618.6	84773.6	100463	94886.8	79431.5
41	acceptor	45797.4	44404.8	44456.4	45940.2	56622.1	60655.6	45841.8	57202.8	46349.7	48330.8	42548.9	39649.6	61052.6	54770.2	41408.1	45184	48626.1	2530.49	-124.544	-86.812	-6941.36	7539.98	404.451	6381.32	3384.92	-136.001	300.567	-580.477	-1326.78	-1468.84	-6344.73	5750.03	446.618	2297.4	4002.39	5079.23	7488.94	-2721.03	-6428.66	2468.69	-6120.07	-2344.52	-9551.75	-10749.7	-4128.67	-7116.61	5421.82	-4093.9
41	fret	0.609602	0.544366	0.584488	0.559402	0.607592	0.646823	0.607592	0.632732	0.637763	0.667976	0.611612	0.449367	0.61865	0.55439	0.591517	0.610607
42	donor	176558	184456	177787	178958	176755	163398	199681	174613	191144	211778	263709	202724	161757	152712	204246	173962	226925	164092	161931	166253	184880	186790	173989	175387	202821	185273	189676	196379	155817	154950	154052	170649	154688	180210	163441	155343	178989	176104	174351	187264	184949	155824	195828	172825	159523	199812	203633	171816
42	acceptor	112562	108317	118344	127208	119075	120097	114826	132031	111389	109024	121810	147022	164737	117371	164141	147762	144486	147536	161451	124118	104329	120595	126451	127702	125418	116536	119060	139729	142052	126659	139318	167215	139815	124145	102816	127530	126840	124669	88237.5	120735	122652	126820	119555	122315	120990	128281	122586	92564.8
42	fret	0.389351	0.370346	0.399998	0.415838	0.402936	0.423876	0.364742	0.430982	0.368473	0.34007	0.31625	0.420851	0.504916	0.435074	0.445404	0.459053	0.389351	0.472954	0.499309	0.427928	0.361032	0.392247	0.420851	0.420851	0.381688	0.386468	0.385509	0.415838	0.477284	0.449577	0.475116	0.494853	0.475116	0.407888	0.386468	0.450624	0.41484	0.41484	0.335596	0.392247	0.399021	0.448532	0.378835	0.41484	0.430982	0.39128	0.375994	0.350016
43	donor	93426.8	106842	112256	97273.3	93280.1	90322.9	89053	106933	103696	101335	106832	104930	92225.6	97566.7	92661.1	109542	98144.4	102738	94577.5	100918	105310	80374.2	78334	80094.5	106099	104013	98506.6	102637	104361	63103.6	117042	88186.5	107667	114782	119202	86361.8	128069	111197	114970	107428	95343.2	111766	123081	105755	117350	82891.1	85481.5	67523.3
43	acceptor	51749.3	61318	78351.7	64519.3	60845.5	68387.4	67890.1	63268.3	74031	65828.7	80071.9	67011.4	81123.9	105577	50188.4	41506.5	48396.9	76018.5	92960.6	73743.7	98964.4	97159.4	69269.6	92246.8	55207.8	75633.6	61526.6	70071.4	87324.7	102093	35296.1	9241.36	46384.1	24891.6	59245	56065	65865	68407.6	72072.6	64208.3	60141.6	65561.8	68795.7	34833.1	68500.9	81915.6	100352	103945
43	fret	0.356021	0.364398	0.411148	0.398743	0.394598	0.430698	0.43275	0.371712	0.416304	0.393561	0.428646	0.38941	0.468453	0.519818	0.351824	0.274339	0.330766	0.425564	0.495743	0.42248	0.484651	0.547691	0.469468	0.534779	0.342364	0.421452	0.384214	0.405985	0.455235	0.618324	0.23223	0.0949254	0.301069	0.178603	0.331822	0.393561	0.339204	0.381099	0.385254	0.373799	0.386294	0.369624	0.358117	0.247404	0.368579	0.49675	0.539751	0.606664
44	donor	31738.1	34431.5	31493.5	33889.1	29371.8	42785.4	32557	21390	30858	32652.7	24665.7	33043.6	36292.6	36813.7	30741	28284.3	33495.6	33498.2	36303.3	26976.2	27492	31940.2	34918	30948.4	31719.5	29518	37390.7	33681.7	30071	30491.1	29419.6	35941.7	31714.2	32612.8	26752.8	32331	28579.4	22171.7	31339.3	26710.3	36994.5	27997.2	31663.6	34064.5	40408.4	25439.4	38159.1	46856
44	acceptor	31807.5	35714.4	43879	31149.2	33637.8	44894.6	39255	42785.9	28926.6	37323.8	34431.3	30157.3	27205.9	29228.2	32303.1	35217.5	49416.9	34315.6	39472.2	40266.3	45156.9	37040.8	30610	44147.1	40384	27062.7	32030.8	45750.4	37386.6	33377.8	30478.3	36024.7	48340.5	39911.3	40276.1	42056.5	33491.1	39273.5	39671.7	40398.9	36377.5	37199.9	32067.5	34423	28313.1	44747.4	38998.4	30991.5
44	fret	0.50017	0.509285	0.581747	0.478741	0.533396	0.512315	0.546337	0.666681	0.483863	0.533396	0.582722	0.476688	0.428906	0.442522	0.512315	0.55426	0.596319	0.506251	0.521376	0.59922	0.621327	0.537387	0.467438	0.587589	0.560182	0.478741	0.461228	0.575889	0.55426	0.522381	0.509285	0.50017	0.604047	0.550303	0.601153	0.565104	0.539379	0.639404	0.55821	0.602118	0.496105	0.570994	0.503213	0.502199	0.412025	0.637509	0.505239	0.398207
45	donor	16067.2	6353.76	11180.8	19128.7	13992.2	27872.3	37374.4	25168.7	20910.8	25760	21467.6	29379.5	10905.9	12804.1	2847.47	13442.3	11421.2	9151.34	5743.13	9289.49	2207.82	7041.76	2428.86	6489.15	30986.2	33677.4	28210.8	32807.1	30863.3	38865	29155.7	23794.1	35419.5	28434.6	34062.9	40091.8	43020.7	38685.4	34105.7	19085.8	21862.7	16204	24484.8	23899.1	24757	22769	24435.1	26210.3
45	acceptor	47373.2	55075.1	47943.9	60389.3	58459.5	27712.1	38826.5	52949.1	60640.6	53872.3	48290.5	51458.8	54680.3	67320.2	69212.6	39598.9	66732.9	57141.4	76825.9	66849.1	81146.6	73559.6	73585	76154.8	47686.4	47760.1	36922.6	41666.1	46024.5	49876.2	48178.3	46563.8	55025.5	40287.1	37518.9	40357	29510.8	55152.3	41024.1	60589.7	46834.7	51968.2	38234.4	47823.8	44428.9	37144.9	22309	31356.7
45	fret	0.74653	0.89636	0.810992	0.759531	0.806432	0.498786	0.509837	0.677847	0.743737	0.676895	0.692084	0.636672	0.83369	0.840028	0.960361	0.74653	0.853526	0.861603	0.930722	0.877694	0.973345	0.912268	0.968158	0.92107	0.605687	0.586151	0.566504	0.559599	0.598857	0.561573	0.62315	0.661633	0.608606	0.586151	0.523849	0.501803	0.406915	0.588109	0.545743	0.760457	0.68165	0.762309	0.609578	0.66641	0.64245	0.620244	0.477581	0.544751
46	donor	49850.9	60393.8	40245.8	48110.5	45133.3	49092.4	48935.1	42011.3	40088.4	30675.3	33353.5	41303.2	35909	57237.2	51632.2	38732	46631.3	42766.6	43540.8	41643.1	42231.6	60730.6	40900.4	49485.8	54694.4	40082.1	40853.2	39584.9	35610	29602.1	29447.9	32119.8	32245.7	45828.8	32831.1	54458.3	39849.2	27348.7	44931.9	31877.5	33728	35927.9	39361.4	26807.4	35075	45145.9	32667.4	50505.5
46	acceptor	83505.9	81658	98275.4	88220.9	77259.8	92805	106593	84343.2	99051.7	87742.5	78870.6	87279.7	79468.2	94615.3	110331	82099.6	93759.6	84392.2	91809.1	102662	91780.4	83564.1	86088.5	95278.3	105372	110230	107941	87499.9	93934.3	84891.9	88034	99943.4	100425	95828.1	116719	87506.9	92041.9	72678.1	78116.8	99221.6	96700.1	95044.5	80637.4	97222.8	91816.5	106755	87486.5	86509.3
46	fret	0.625946	0.575199	0.709248	0.646805	0.630915	0.653753	0.685484	0.667642	0.712217	0.74089	0.702322	0.678547	0.688456	0.622965	0.68152	0.679538	0.667642	0.663674	0.678547	0.711228	0.684493	0.579184	0.677556	0.657722	0.658714	0.732984	0.725076	0.688456	0.725076	0.741878	0.74978	0.756691	0.756691	0.676565	0.78037	0.616006	0.697372	0.727053	0.634889	0.756691	0.741878	0.726064	0.671608	0.784314	0.723098	0.702322	0.728042	0.630915
47	donor	72479	72924.2	74816.4	66637.9	84165	75683.9	72740.1	69396.9	77481.9	77636.7	74793.5	70095	68632	74435.5	73094.8	86198.6	73977.6	67404.1	70664.4	67427.6	76155.2	75508.1	73642.6	73915.8	77884.4	70098.8	67823.8	72286	82983.5	75928.5	76837.3	73070	76618.9	80812.3	75442.5	71273.9	71611.5	78228.3	82040.9	79083.1	74838.7	73561.7	73339.4	82537	76565.4	73535	73616.5	74408.2
47	acceptor	19810.9	24025	11458	9893.08	13124.1	11431.2	13777.9	20151.4	14471.4	10085	16208.8	20057.7	18590.7	12789.6	14722.9	14215.2	16907.5	17334	18491.9	18085.7	13356.8	14898.1	11469.2	16628.2	19756.6	13797	14866.6	18385.5	16272.5	12696.3	16491.8	15669	11979.7	14810.2	15075.9	15640.3	15930.1	11216.6	19635.7	15088.8	15861.2	16753.9	18850.8	13463.4	17040.7	15215	11743.6	12640.2
47	fret	0.214894	0.247566	0.132985	0.129202	0.134879	0.131094	0.159539	0.225446	0.157639	0.11503	0.178573	0.222567	0.212977	0.146249	0.168097	0.141509	0.186203	0.204359	0.20723	0.211061	0.149094	0.165243	0.134879	0.18334	0.202445	0.164292	0.179526	0.202445	0.164292	0.143404	0.176667	0.176667	0.134879	0.154789	0.166195	0.179526	0.182387	0.12542	0.192886	0.160489	0.174762	0.185248	0.204359	0.140561	0.182387	0.171905	0.137719	0.1453
48	donor	5107.36	8183.69	7724.18	17373.8	13581.3	16777	14614.9	9612.43	10224.5	19005.3	6852.54	10941.7	9296.93	8686.78	10416.8	8227.27	11234.4	12067.2	6151.43	19614.5	10321.1	9921.29	7538.48	11646.6	7547.96	9709.07	10940.7	8015.99	6132.49	8538.03	8672.57	9431.47	10674.5	8376.02	14760.8	13632.4	10440.5	10183.7	5659.71	10765.5	9333.88	11447.6	7722.29	11516.8	11658.9	11033.6	7610.49	12188.5
48	acceptor	31780.6	43788.1	49677.9	40845.2	45250.9	47465	45152.1	43858	50321.9	41614.8	42467.8	38820	42150	44095.8	36933.2	39467.4	39838.3	41053.6	34876.7	40720.3	50670.1	43903.8	50945.4	38151.3	48522.1	48230.2	40238.1	44750.4	41066.6	43329.7	36699.8	41593.4	45019.5	47576.6	40880.5	42013.9	35426.2	53053.3	54496.5	47050.5	43636.8	46468.5	44043.2	43599.2	45155.6	43625.8	45303.9	47238
48	fret	0.861108	0.842315	0.865796	0.701176	0.769342	0.738725	0.755012	0.820621	0.831014	0.686665	0.861108	0.779827	0.819675	0.835721	0.779827	0.82724	0.779827	0.773157	0.84984	0.675028	0.831014	0.815893	0.871417	0.766479	0.865796	0.832893	0.786489	0.84796	0.870481	0.835721	0.809267	0.814947	0.80832	0.84984	0.734886	0.755012	0.772204	0.838548	0.905947	0.814001	0.823455	0.802634	0.85078	0.791242	0.795042	0.79789	0.856416	0.795042
49	donor	18357.7	21718.8	16337.9	17756.2	18357	21899.6	21094.3	25274.4	23064.4	28327.9	18493.1	24277.4	22029.3	22484.5	20287.5	20170.1	20938.7	18694.8	21844.1	21128.8	19781.1	16700.2	23271.1	16977.6	22134.4	20662.1	21543	21657.6	19883.4	20323.5	24206.8	28134.1	27117	22716.5	21617.2	16660.6	20494.2	22016.3	24896.2	19655	21780.8	19915.1	23594.6	25041.7	26779.9	17057.5	19562.1	22947
49	acceptor	21522.1	21604.4	24624.6	28121.6	27065.6	31036.5	23253.6	25439.6	22229.1	21927.5	29853.3	24288.7	19843.7	32461.9	23455.3	24788.3	29663.6	33904.4	26155.3	20952.6	25415.1	27967.8	21974.1	31441.2	27046.8	26363.9	23658.3	31422.7	31557.9	22919.7	29285.5	22845.8	29941	27582.4	27284.2	37932.2	27832.4	23122.3	30270.6	21081.9	28075.2	30803.3	24790.9	28027.4	30284.3	28616.9	31758.6	26984.3
49	fret	0.539894	0.498938	0.601077	0.612807	0.596177	0.586352	0.523959	0.501948	0.490899	0.436237	0.617687	0.499941	0.473766	0.591264	0.535916	0.551805	0.586352	0.644911	0.544861	0.497934	0.562694	0.626457	0.485867	0.649754	0.549822	0.560716	0.522961	0.592253	0.613783	0.529942	0.547839	0.448442	0.524957	0.548831	0.557748	0.694995	0.575526	0.511968	0.548831	0.517968	0.562694	0.606943	0.511968	0.527948	0.530938	0.626457	0.618663	0.540888
50	donor	46217.4	44749.9	44679.3	30616.9	51453.9	50930.4	48042.3	41819.2	37025.3	40556	35276.9	40161.9	32752.1	40889.8	36021	33597.6	42444.1	36648.9	33963.8	41632.4	30936	38588.5	33838.8	41814.8	36816.5	44189.6	48589.4	39579.6	35726.9	36988.6	39272.3	39317.9	32166.8	38238.5	33309.4	45316	41360.4	40042.8	36185.7	42160.3	39075.2	34241.7	44313.1	46617.4	42611.8	44420.5	42207.4	43022
50	acceptor	55778.6	52029.9	47951.9	53334.4	39442.7	44311.6	47878.1	46711.1	43501.2	51808.4	49061.9	39688.5	47826.9	49714.7	47623.4	49554.8	45371.3	39457.9	50351.8	45355.2	56273.7	49000.1	37080.4	58209	50609.9	41247.2	46076	42266.4	46121.8	48277.8	35509.8	50497.9	48821.2	32448.7	46435	42437.8	41897	46391.7	48782.5	43914.2	51710	29323.9	41833.9	42403.8	43002.6	34179.5	42137.4	39325.6
50	fret	0.546775	0.537743	0.517695	0.635404	0.433818	0.465709	0.498677	0.527715	0.53975	0.560834	0.581955	0.496676	0.594038	0.548783	0.568877	0.596053	0.516693	0.518697	0.597061	0.521702	0.645513	0.559829	0.522704	0.581955	0.578936	0.482682	0.486679	0.516693	0.563849	0.565861	0.474692	0.561839	0.603108	0.458726	0.581955	0.483681	0.503679	0.53674	0.573906	0.510685	0.569883	0.461719	0.48568	0.476689	0.502678	0.434813	0.499677	0.477688
51	donor	25842.7	29735	26079	27373.4	25409.7	27708.8	28143.3	24057.4	23706.7	25400.5	23324	22548	23450.6	29950	25062.1	26217.7	30279.3	20505	27754.6	22349.8	26005.8	22522.1	24937.1	28050.3	30596.4	31549.3	24263.2	25566.7	28088.4	23882	34452.2	29931.7	22224.8	26711.7	29948.5	35408.1	61829.6	61570.5	73003.5	59673.8	63435.1	63323.8	66539.2	69949.7	69085.3	59134.1	67351.8	72143.6
51	acceptor	33007.2	39964.6	51308.3	41773.7	42637.8	40905.6	43581.4	43884.2	39391.4	48200	44395.4	43917.1	46557.9	40812.4	37614.9	46730.2	35568.6	45173.7	40546.3	48546.7	38005.8	50071.5	41085.7	42813.3	38631.1	38012.1	43737.9	46500.1	45295.5	38116.3	48820.3	37087.7	47928.5	40021.7	34877.5	33691.1	77.625	-777.344	-2479.61	-2770.51	3378.78	6081.62	-1249.87	-5282.44	280.314	772.159	746.479	2326.74
51	fret	0.560635	0.573437	0.663469	0.603758	0.627007	0.595955	0.607647	0.646253	0.62411	0.654873	0.65583	0.660606	0.665375	0.576384	0.599854	0.640492	0.539839	0.688162	0.594004	0.684376	0.594004	0.690052	0.622177	0.603758	0.557673	0.546787	0.643374	0.645294	0.617338	0.614431	0.586185	0.553719	0.683429	0.599854	0.537851
52	donor	66632.7	67987.8	61959.3	58172.3	76457.5	60343.6	68189.9	59090.6	46938.8	52926.2	64843.9	54989.2	48555	53197.5	51644.7	83301.8	76978.3	98161.7	108609	83927.5	67425.4	57387.4	82087.5	91662.6	81873.2	103767	87383.3	82942	85541.8	78807.2	77949.8	94504.2	76221	86524	100990	99029.2	90155.8	64675.6	89179.9	81168.6	71610.4	61513.9	68276.5	68379	91131.7	88587.5	79494.9	88301.2
52	acceptor	18285.6	17851.7	17174	27976.1	13851	18712.2	23991.9	30336.1	16425.7	10964.6	20862	20061.1	35352.3	25538.6	17834.1	1598.35	-2052.89	686.266	4885.26	-4488.89	1032.6	-1070.78	1342.42	-3169.11	2277.93	-3915.38	2438.19	-2149.64	3328.85	-3879.94	1246.55	-513.735	-2565.44	-202.047	-129.553	1150.56	-626.569	1449.82	-4738.06	-2158.17	-517.605	432.579	-2333.1	-1968.59	-4258.63	582.048	-1165.12	-687.339
52	fret	0.215874	0.207883	0.217201	0.325192	0.153316	0.236942	0.260234	0.339711	0.258951	0.171302	0.243455	0.267904	0.421102	0.323975
53	donor	27166	29982	26984.9	31695.7	26986.4	30208	31449.6	28878.2	29548.5	28511.3	27469.4	32288.7	27073.1	29756	26618	28760.5	35779.6	31455.8	28641.3	26783.6	34315.1	27367.3	27655.2	32403.2	31314.9	23884	28862.7	30639.9	34096.8	29773	38304.6	30158.5	26923	36378.7	25031.2	28025.2	32047.2	32061.1	26215.5	29873.6	32960.5	29203.3	29899.9	27814.7	25283.5	29918.5	28729.6	29516
53	acceptor	20037.8	30643.6	34052.4	34965.5	26100.4	14693.4	33619.1	31663.5	32261.8	28339.6	30756.5	31961.7	29552.9	19401	25531.5	21671.3	35361.7	35540.2	31284.6	29530	29297.2	24855.5	30248.3	30539.2	19616.5	34536.5	26823.7	34895.1	28986.9	31734.3	33879.1	27409.3	30312.7	38248.8	32080.4	38440	43147.9	38020.5	34254.4	39658.9	32742.6	19596.7	40246	30744	30067.7	29631.6	40574.9	32497
53	fret	0.424787	0.505202	0.558047	0.524185	0.491185	0.327245	0.516197	0.523187	0.522189	0.498196	0.528176	0.497195	0.522189	0.394428	0.489181	0.429836	0.497195	0.530171	0.522189	0.524185	0.460065	0.476142	0.522189	0.485171	0.385299	0.590779	0.482163	0.532165	0.459059	0.516197	0.469112	0.476142	0.529174	0.512201	0.562021	0.577903	0.573933	0.542129	0.565994	0.569964	0.498196	0.401522	0.573933	0.525183	0.543125	0.497195	0.585831	0.524185
54	donor	43826.3	45121.1	43569.1	42099.6	43100	41903.9	45979.2	41180.7	40634.5	46229	43123.6	41587	48523.5	46587.5	45982.3	37824.9	52173.8	50089.9	41598.2	47346.1	47864.9	45479.6	48744.7	41339.7	38005.1	45286.4	49190.2	45258.5	39670.2	40217.6	50303	51350	46255.7	41771.6	41514.3	41549.7	48087.4	43802.1	44002.7	49446.2	35150.7	48263.2	49763.1	44944.7	46507.3	43707.6	44773.8	45875.4
54	acceptor	46441.6	47780.1	41012.6	48070.2	37672	38407.6	44910	45175.3	50242.7	48201.3	39154.3	42636.7	41211.5	43271.4	43133.5	43135.4	44136.3	46262.7	50374.2	41475.6	40920.5	40924.7	52301.5	55446.3	46241.2	45685	48651.8	51208.6	45170.5	45817.5	48159.6	49562.8	44614.5	47305.8	45597.3	46725.5	41247	43280	51424.7	44624.8	43860.1	42957.5	42104.8	46919.2	44160.2	44283	51951.6	42767.8
54	fret	0.51425	0.51425	0.48525	0.533249	0.466249	0.47825	0.49425	0.52325	0.553247	0.51025	0.47625	0.50625	0.459248	0.48125	0.48425	0.533249	0.458248	0.48025	0.547248	0.467249	0.461249	0.473249	0.51725	0.573245	0.549248	0.50225	0.49725	0.531249	0.532249	0.532249	0.48925	0.49125	0.49125	0.531249	0.52325	0.529249	0.461249	0.49725	0.539249	0.474249	0.555247	0.471249	0.458248	0.51025	0.48725	0.50325	0.537249	0.48225
55	donor	5981.19	393.456	467.662	18893.1	7576.63	10236.9	26829.5	6400.46	-5383.51	-77.7549	-6092.18	1120.68	3569.49	591.958	18549.9	26269.2	25950.1	13270.1	14153.2	21774.2	20739	5942.24	4283.72	3076.02	92837.9	106030	112671	165746	141026	155355	162371	177880	154526	156535	149797	128524	151763	143806	144001	117671	138597	155928	140673	114302	147174	149198	168949	157998
55	acceptor	114790	122150	125154	88814.5	81159.1	95487.8	79971.1	91333.9	120057	113827	128918	131294	111403	118607	65470.4	89991.9	80071.9	105478	93344.9	99219.9	74664.5	94683.1	92606.7	95313.3	77674.6	4145.83	2903.75	4007.23	1217.41	7133.43	-1097.05	6728.08	3623.19	2347.1	4068.33	7659.5	2992.75	3685.2	5350.32	3407.48	-2603.37	2457.58	3675.39	4352.09	503.703	1395.7	6056.15	-554.681
55	fret	0.949821	0.997252	0.99588	0.824566	0.914063	0.903603	0.748952	0.935167	1.04735	1	1.05018	0.991769	0.968645	0.994508	0.779044	0.774194	0.754928	0.888027	0.868748	0.819586	0.78269	0.940482	0.95518	0.968645	0.455561
56	donor	9047.13	-819.733	10745.7	-5842.42	-2980.81	-2769.85	16990.9	4075.83	21948.7	8330.38	1619.94	-3724.62	-798.095	6318.06	7743.45	-5882.99	15633.2	3004.76	3848.64	5633.76	6291.01	2937.14	-2988.93	-1947.61	7697.47	149626	181225	172251	185206	220203	188447	209576	237643	99958.6	132748	126227	148260	146580	112357	-7316.5	-1347.16	7048.34	-1038.82	-15979.8	-5415.07	-6115.6	-5966.84	2436.77
56	acceptor	157231	171892	173798	167780	167242	166715	172942	171981	167272	175760	159950	177805	156317	141862	171607	167888	181841	166142	149064	172200	156460	179731	191204	162285	150005	36006.2	-3912.18	2912.49	-371.939	3687.35	-1443.76	1089.11	-1362.34	8470.45	2310.08	-565.764	1967.87	4022.07	-4581.44	-512.313	-3247.36	-4151.35	3750.31	1379.4	7829.39	-1045.93	-2131.35	-3675.57
56	fret	0.944888	1.00438	0.940785	1.03564	1.01765	1.01765	0.9106	0.976274	0.883335	0.955229	0.989139	1.02211	1.00438	0.957312	0.957312	1.03564	0.920548	0.982684	0.974148	0.967797	0.961491	0.984831	1.0153	1.0132	0.951078
57	donor	1632.14	2287.6	-2154.16	1297.78	163.138	-100.04	2579.74	-681.019	-1425.04	10395.6	9902.39	9496.86	3854.26	11601.5	10298	54526.8	56344.3	57853	63488.1	54065.9	50569.2	46467.6	44871.2	52378.4	43697.6	51960.4	43446.9	52125.1	50533.6	48613.6	57334.9	44069.2	49715.1	46635.6	55049.9	50696.7	47906.8	49953.5	53245.7	51300.8	54638.6	56845	62613.4	35596.2	-40.4522	-100.867	-484.876	-2342.85
57	acceptor	48361.4	56626.1	39360.4	42478.5	37690	60951.8	59127.7	44456.5	55177	45426.3	58064.4	59413.1	45594.6	46841.8	56561.1	2001.93	2628.4	7843.52	4610.01	5924.64	9092.67	1737.25	-1666.27	-2428.17	3568.5	6872.99	2318.25	1930.37	6762.56	6248.59	1782.8	10049.7	8995.31	3848.69	105.093	2913.45	-1893.42	366.293	623.644	3256.86	51.33	6553.65	3493.8	11168.5	6792.54	938.393	7078.98	4323.07
57	fret	0.967134	0.961382	1.05774	0.970559	0.995648	1.00167	0.957904	1.01551	1.02649	0.813682	0.85454	0.862015	0.922008	0.801226	0.846288
58	donor	91478.3	90080	87907.1	83802	91434.5	85327.2	83847.9	94495.8	88230.9	92666.5	94723.4	95688.4	85653.2	108227	85040.5	81725.3	187222	207697	222455	228442	132538	-6285.12	3213.97	-9066.36	2211.76	-2188.76	-2602.34	-1169.05	671.25	-2219.4	-5615.53	-2571.7	-1788.32	1349.6	41.0415	-3790.54	-3346.33	1360.54	-6466.74	-6258.86	-3994.05	-3015.91	1855.08	47.6054	2631.9	402.099	-2972.15	-2840.85
58	acceptor	61513.6	60074.3	60203.7	62919.9	60126	62319.1	61607.9	57879.5	57989.9	52378.8	63464	62593	62684.1	64286.8	60465.2	59007.5	15105.1	-1228.07	120.947	-1437.34	2046.47	2989.68	-1569.38	946.507	-3013.88	470.411	3365.51	307.587	-1557.02	1416.9	4585.73	-3233.68	-516.69	616.515	-483.428	520.959	-1200.87	-1020.7	1851.99	897.128	-1431.1	2259.76	201.769	-2456.49	-1640.2	1842.29	-1068.94	1073.19
58	fret	0.401621	0.399689	0.40647	0.429103	0.396798	0.42217	0.423161	0.379655	0.396798	0.360998	0.401621	0.395837	0.42217	0.373079	0.415267	0.419205
59	donor	55119.9	59411.9	54857.5	39106.3	42240.1	39098.8	40152.2	61597.3	66867.7	36339.9	52083.6	48680	42416.2	66410.4	42974.8	49658.3	40778.2	53380.6	59014.6	52630.9	50790.4	51562.6	41235.5	50501.8	47589.2	41876.5	38517.8	37951.8	28636.8	45879.9	26226.5	27830.8	37179.6	23745	31939.2	29885	29907.5	32692.6	31793	42551.2	67512.5	37959.3	36527.4	38810.2	53961.6	59280.7	50036.9	56578.1
59	acceptor	32869.8	24537.2	19625.4	41692.9	37894.9	44495.2	42657	49843.4	23427.2	17438.1	15060.3	23658.7	30186.6	14532.6	30124.7	16954.6	16810.6	29275.8	23601.4	24271.4	28916.8	23308.7	26530.7	17003.2	28667.5	21791	30029.8	26589.1	34146.5	39546.2	25632.8	31482	48931.7	54541.3	52848.7	37247	50084.9	52048.4	34022.4	20109.3	35998.6	36010.9	47960.1	27178.7	33751.5	33113	40372.9	40943
59	fret	0.373362	0.292369	0.263368	0.515701	0.472501	0.531922	0.51469	0.44766	0.259646	0.324505	0.224521	0.327357	0.416156	0.179837	0.41224	0.254068	0.292369	0.354108	0.285796	0.315965	0.362757	0.311226	0.391767	0.252213	0.37626	0.342614	0.43778	0.41224	0.544159	0.462541	0.494528	0.530905	0.567731	0.696884	0.623783	0.554386	0.625878	0.614371	0.516713	0.320706	0.347398	0.4865	0.567731	0.41224	0.384973	0.357949	0.446671	0.420076
60	donor	43775.2	50874.8	44406.2	48712.4	41049	49564.8	42315.5	44883	43075.6	41725.1	45733.1	44575.2	47505.1	44647.5	48250.5	49209.1	41049.8	39345	42548.7	49241.6	41249	42924.3	39807	45781.8	43015.1	52674.8	51356	50727.9	51491	47023.9	47391.4	44530.2	47327.2	44471.2	46604	45401.8	42146.5	46912.5	47825.4	46886.6	49449.7	44480.7	48011.3	42225.4	48901.4	39198.1	48018	46367.1
60	acceptor	73818.6	63484	61293.7	66565.8	77158	62344.2	63516.9	60869.8	64526.3	71970.9	59525.3	66300.6	68892.7	58522.5	58221.2	67229.5	61961.4	58298.2	62928.8	64144.7	69732.3	62528.6	66828.8	60915.3	68937.6	64866.5	61876.3	57235	64160.2	60570.4	59713.3	55749.8	58090.4	73233.5	63207.3	62886.3	73239.9	64344.9	73650.4	54836.7	57238.9	62384.9	66755.2	58994.8	63880.9	63327.7	71308.7	57966.7
60	fret	0.627777	0.554987	0.579934	0.576943	0.652665	0.556984	0.599878	0.575945	0.599878	0.632756	0.565966	0.597884	0.591902	0.566965	0.547	0.576943	0.601871	0.596887	0.596887	0.565966	0.628773	0.592899	0.626781	0.570957	0.615823	0.551992	0.546001	0.53002	0.554987	0.562972	0.557982	0.555985	0.550994	0.6218	0.575945	0.580932	0.634748	0.577939	0.605858	0.53901	0.536014	0.583924	0.581929	0.582927	0.565966	0.617816	0.597884	0.555985
61	donor	37028.2	25991.3	10640.1	29559.9	24763.9	37557.8	36676.6	45713	31375.7	42080.1	57356	44314.5	50529.5	23693.9	41275.5	107080	129008	128770	121429	119603	113026	110851	126092	148183	128636	140442	129148	133591	127752	116829	138510	122910	145040	139345	129502	132693	65382.6	-2861.19	-547.353	-2350.8	-1314.98	-333.895	-1955.36	2456.12	-1074.16	-277.793	-2030.62	346.163
61	acceptor	81422.3	94765.9	95687.8	83865.9	118209	91308	100676	73301.3	94430.1	77528.4	83521.5	84236.8	103641	113375	68536.5	-1640.21	2584.61	-4662.93	1635.24	3067.25	-97.356	904.636	698.625	-225.527	-1495.34	-926.133	2902.52	1441.81	3133.07	1543.67	512.961	4749.47	3625.49	-1426.75	1014.82	2658.86	-2553.6	1426.74	3445.22	397.396	2263.9	85.639	1204.16	2199.6	110.442	2186.27	7229.32	4599.68
61	fret	0.687429	0.78428	0.899423	0.739331	0.826308	0.708776	0.733214	0.615536	0.750553	0.647889	0.593342	0.654977	0.672208	0.827335	0.624627
62	donor	114661	47303.6	48394.7	45336.9	41080.4	53742.2	42683.4	56108.5	47241.4	40376.9	54043.7	42578.2	57749.9	58752.4	58611.2	46014	43695.5	44922.9	73309.2	179937	180710	198619	193752	181495	203232	102633	-1702.34	20.3551	-8188.78	-5901.42	-2192.83	-608.909	-5078.35	-2403.38	-4420.38	-7461.42	-5169.27	-6324.91	-3247.98	-1254.92	-2216.76	-4944.36	-4379.7	-6839.33	-10102.9	-5901.42	-8971.17	-307.436
62	acceptor	62123.9	57843.6	67517.1	63461.2	75948.7	64854.6	71955.6	64390.2	59237.9	61389.7	70768.6	60898.2	62022.9	60189.8	55856.1	64046.6	68961.5	58483	30670.3	-2772.71	-1886.08	-3618.76	-740.954	2403.6	2250.89	-1778.4	741.722	461.567	1026.9	-207.809	645.637	-3052.83	670.242	-1746.82	1996.07	-3364.14	-114.676	1438.08	3716.4	-1919.8	-2113.19	576.718	-2901.41	874.149	-536.988	-1130.17	1223.19	538.629
62	fret	0.351224	0.55002	0.582502	0.58378	0.649171	0.546362	0.627204	0.534299	0.556158	0.603213	0.567335	0.588914	0.517698	0.50614	0.487964	0.582502	0.612454	0.566084
63	donor	26637.2	32106.6	29995	33329.7	27371.8	29639.8	31087.3	31445	31529.6	31521.9	29220.6	24930.7	29282.1	29773.2	27793.6	24452.5	32398.9	30064.2	36714.4	28701.3	29395	31671.9	30739.9	29473.2	32514.3	30298.8	27057.7	29969.3	30697.6	28351.3	33725.8	32687.3	33498.9	34337.4	28412.9	25870.5	30200.1	31500.1	31012.9	28892.4	31507.8	33404	29957.8	28389.8	27318	30133.4	29429.6	29751.4
63	acceptor	44546.9	39631.6	46056.6	40642	44290.3	43970.4	44049.7	50898.5	47109.5	40518.3	37447.9	47356.4	43254.3	47167.4	46258	46197.7	51487.7	42229.1	47331.8	43514.6	39113.2	40766	44463.3	40780.2	42563.7	40799.9	46839.1	39090	44132.2	49571	47232.8	47233.8	48764.8	39252.2	46510.5	47057	43745.7	47958.9	39915.9	47272.4	45721.4	53540.7	48255.3	48664.2	47956.6	45649.2	45094.5	37976.3
63	fret	0.625656	0.552787	0.606067	0.54981	0.61783	0.597232	0.5864	0.61783	0.599192	0.562697	0.561707	0.654895	0.596249	0.612932	0.624678	0.653923	0.613912	0.584429	0.562697	0.60214	0.57061	0.562697	0.59133	0.580485	0.566655	0.573575	0.63347	0.565666	0.589361	0.636397	0.583443	0.59133	0.592314	0.532908	0.620766	0.645168	0.59133	0.603122	0.562697	0.620766	0.592314	0.615871	0.616851	0.631518	0.637372	0.60214	0.605085	0.560716
64	donor	24478.7	18957.1	18981.2	18754.9	21065.3	13023.1	15397.5	21179.4	15375.5	20586.8	16596.8	13771.9	17553.7	10692.8	16815	14983.1	21315.5	19844	17539.7	21848.1	16458.6	19115.3	16262.4	20252.4	19029.2	16300.5	19908.1	15761.9	22865.1	21796	20194.4	16666.8	19005.2	19615.8	15715.9	18708.9	18787	20744.9	16060.2	13731.9	22510.7	23327.6	18454.6	13063.2	19735.9	19293.5	16752.9	18490.7
64	acceptor	34752.8	36934	26594.7	36627.7	33708	27626.5	34299.8	36856.2	27708.5	22390.9	27018.9	37486.9	28987.2	32898.7	32261	27032.3	28205.8	34733.9	26176.7	30368.9	35731.9	30815.3	21450.1	34140.4	32636.9	44151	33574.9	34042.8	32831.9	30434.9	40396.2	39154.6	32511.7	41449.3	34790.5	32046.1	27984.5	31158.5	37675.4	34124.1	33246.7	34727.7	37082	25137.8	29301	34160.9	24833.9	33271.3
64	fret	0.587059	0.661005	0.583173	0.661005	0.614953	0.679423	0.690372	0.634853	0.643325	0.520718	0.619714	0.731641	0.622563	0.75451	0.657296	0.643325	0.5695	0.636754	0.59866	0.581227	0.684907	0.616859	0.568519	0.627301	0.632025	0.730755	0.627301	0.683081	0.588998	0.583173	0.666553	0.701244	0.631082	0.678508	0.688552	0.631082	0.59866	0.600586	0.701244	0.712937	0.596732	0.59866	0.667476	0.658224	0.597697	0.638635	0.596732	0.642388
65	donor	30421.1	32603.2	28319	34025.1	25683.8	27138.2	29449.8	29217.1	29298.1	37605.4	70040.7	76184.9	82569.2	70778.2	83253	55946.3	62835.3	72529.9	68308.6	68889.8	69668.6	70390.1	80420.6	89774.1	82929.9	62373.9	65835.9	65823.6	74355.3	62373.9	72159.3	67174.7	64257.7	68900.1	83263.9	72824.6	84994.4	71872.3	68869.1	72713.6	77270.3	54176	70300.8	61787.6	54969.3	57873.4	62017.3	71908.5
65	acceptor	68009.1	56868.5	61931.2	63963.6	68747	53559.1	56427	46225.2	49939.5	18030.3	1921.65	520.408	1215.24	-144.333	1871.26	-721.778	-3963.76	-1110.57	519.087	-1826.93	8034.37	5896.75	3366.26	4098.73	58.636	4879.23	4966.6	4877.79	-980.466	6129.8	-6.389	-1111.85	569.041	213.53	-1347.14	3427.54	6137.41	-570.656	3945.54	763.819	-2131.3	1156.44	-905.706	2405.21	1691.19	-406.754	-1493.96	2047.37
65	fret	0.691121	0.635511	0.686658	0.653107	0.727967	0.664116	0.656804	0.612917	0.629901
66	donor	-253.3	-2.89654	7031.25	1680.47	11312.8	8357.3	61.9894	3731.23	-3983.77	-1970.48	3521.03	-1955.86	4865.35	3173.76	8227.52	3937.76	4121.45	8413.04	857.067	366.312	4.4152	-1747.5	14308.5	41470	12847.2	17462.3	16188.4	12032.9	6226.12	9497.82	16008.3	17865.3	21365.5	18814.8	25495.3	19900.5	20617	16125.3	17253	14918.1	12056.7	10239.9	17092.2	1517.8	2005.82	200.9	536.294	-2860.61
66	acceptor	46356	38766.9	47360.2	56164.7	44250.4	53159.8	63130.5	57695.4	68422.8	54624.9	52205.9	56570.6	52948	54145.8	52968.1	51009.4	49654.3	45427.2	48657.3	47093.7	51700.1	42659.7	39108	27734.8	35475.4	29854.7	40321.3	38196	45564.7	37191.9	46650.2	46125.7	21106.3	30162.3	41055.5	33055.1	31385.8	35727.2	22714.7	53858.7	29482.5	23335.7	33482.8	46837	48447.5	49964.2	54681.2	51453.4
66	fret	1.00576	1	0.870714	0.971261	0.796778	0.864033	0.998846	0.939333	1.06167	1.03711	0.937063	1.03595	0.915566	0.945014	0.865145	0.927997	0.923472	0.844062	0.98273	0.991931	1	1.04294	0.731839	0.401157	0.733985	0.631332	0.713645	0.760923	0.879641	0.796778	0.744736	0.721126	0.49724	0.615718	0.616757	0.624037	0.603276	0.689177	0.568258	0.782618	0.709378	0.695544	0.661706	0.968971	0.959827	0.99654	0.990779	1.05932
67	donor	59161.6	55566	59700	55941.1	68399.8	52850.6	56287.6	63484.7	66265.4	58856	57981	65435.3	58464	56036.8	49728.7	52647.6	57362.1	60171.4	60152.7	58810.5	114389	136766	132772	134492	139777	130885	136212	135719	140596	139501	132639	134858	141198	132219	135283	131403	130074	133739	139079	146894	136001	72463.2	-779.791	-690.542	764.273	-422.213	-496.878	717.607
67	acceptor	74234.7	65884.5	66475.5	69449.1	75791.7	69910.3	73549	60787.1	61144.1	69927.4	74962.3	67377.7	55865.8	67036.1	69979	61021.6	59444.1	72525.7	77702.4	61603.5	17787.6	-51.642	-1635.62	-548.585	-1898.62	-3212.43	-1243.74	-715.052	-596.455	2103.73	-83.79	-553.959	-1741.35	-2873.76	-89.433	-1315.34	785.103	-2970.34	345.332	-495.068	1722.29	517.703	-3081.15	-671.626	1542.62	-1042.2	666.719	-295.681
67	fret	0.556282	0.542183	0.527102	0.554266	0.526097	0.569404	0.566375	0.489024	0.480032	0.54319	0.564356	0.507037	0.489024	0.544197	0.584567	0.537153	0.509042	0.54621	0.563347	0.512049
68	donor	15341.3	14370.6	7135.4	14559.5	13577.6	12907.7	9719.9	11366.2	10117.6	15630.3	12741.8	13224.4	10018.4	16972.5	13480.8	17782.2	11076.4	13281.5	18832.3	10724.8	13938.8	12569.5	16356.6	13653	16301.8	15600.9	14922.2	14310.2	14361.8	14815.1	13353.8	11930.5	16835.2	12687.8	10580.3	11812.3	15747.7	15153.2	17223.4	22095.5	10875.6	15103.2	16023.2	17361.5	11622.6	14831.7	12444.1	13841.1
68	acceptor	41132.9	45668.2	50776	39874.2	43010.8	43266.7	40849.7	39590.9	41079	33727.4	41919.1	43069.2	44385.2	37496.1	40329.1	45047.1	52869.2	39290.1	36382.8	45705.1	46411.4	40386.9	40554.8	38373.7	38870	38296.1	38493.4	39429.5	38976.6	44770.1	37434.8	48598.5	43781	37084	43378	35195.8	45402.7	43422.1	42037.8	38427.7	40246.5	46760.8	36510.1	41330.2	43407.6	41973.2	36046.5	42457.9
68	fret	0.727903	0.760232	0.876772	0.732952	0.760232	0.770344	0.807794	0.777425	0.80273	0.68352	0.76731	0.765288	0.815897	0.688559	0.749114	0.7168	0.827047	0.747093	0.659348	0.809818	0.769333	0.762254	0.712764	0.738002	0.704694	0.710746	0.720837	0.733962	0.730932	0.751135	0.736992	0.80273	0.721846	0.745073	0.803742	0.749114	0.742042	0.741032	0.709737	0.635198	0.787543	0.756189	0.694609	0.704694	0.788556	0.739012	0.743052	0.754167
69	donor	20263.3	13138.7	18296.9	18123.8	26495.6	16181.1	19976	15317.3	16131.2	25814.5	19880.9	21984.3	22782.5	20183.4	22255.9	27035.5	34254.8	31082.1	27554	30195.4	27861.7	27580.2	31970.1	20800.9	21366	16183.5	25458.6	31610.5	28499.2	29073.8	26446.1	26976.5	30621.1	25282.7	26387.2	35185.2	29616	31434.1	30612.1	24953.5	28570.5	21957.2	34682.4	22678.8	23502.2	21867.8	28364.1	35688.9
69	acceptor	16931	8146.96	11438.2	9645.41	12119.4	10876.2	10820.2	5906.23	13765.6	14864.9	11933.4	9632.24	16136.8	10961.2	1834.33	132.399	1140.64	461.373	-1628.33	-2535.3	207.108	2119.15	-2617.99	-2246.38	-3005.79	1283.15	-26.936	-2989.11	300.445	1593.79	3332.76	-2140.8	-4.631	-3743.32	-914.237	377.337	-1190.62	-1162.45	-1568.69	-1412.81	-446.165	1053.77	-9077.29	-4145.28	-4629.27	168.753	-3728.16	941.99
69	fret	0.454997	0.382522	0.384945	0.346728	0.313536	0.40174	0.351741	0.277907	0.460615	0.3654	0.37522	0.304414
70	donor	36127.5	27040.1	28640.9	24653.4	78557.7	112391	112493	111159	118698	121220	105783	108230	103951	103622	116944	124327	107531	109875	116597	113036	114648	119057	97226.8	107500	119198	108328	106729	114865	127387	83487.6	103124	110553	116369	115069	114695	118661	108969	121971	115969	104306	115013	113971	116346	110047	115145	126292	107311	119277
70	acceptor	78994.5	81336	82815.7	89855.3	36849.6	1395.62	-378.486	-3145.53	-394.262	715.76	2323.09	1707.07	3814.92	-3430.47	-1688.24	1070.08	2703.63	2598.37	510.046	1765.56	106.522	-312.282	787.975	326.223	-476.932	2365.13	772.664	-3248.52	445.862	1559.38	40.137	-371.767	-1525.45	-1078.29	4542.38	-1275.3	646.539	292.809	3998.84	-1159.04	978.674	-2991.5	260.971	1709.33	1741.81	-2720.28	1095.31	706.682
70	fret	0.686695	0.750632	0.743475	0.784243
71	donor	33686	30585.7	33487.4	39272.4	29512.5	37804.6	22887	35820.2	43527.7	43313.4	36676.5	27800.8	38570.3	27794.7	35071	24577.8	28592.7	31961.2	24089.1	18485.3	98137.9	125728	149295	122216	116347	147646	153863	156031	153361	131196	137110	139932	158925	169852	146122	131220	144744	143160	28142.3	-1482.11	-1602.32	-2861.93	11.8295	-2064.01	-1416.78	3788.93	1956.13	758.363
71	acceptor	80448	94089.7	77068.7	91051	89311.8	85150.3	100352	91460.7	87999.1	88685.9	84182.6	88947.6	90945.3	87360.1	81999.1	86685.6	116887	116778	115520	116230	86954.7	-3016.69	-1661.25	2079.96	-7613.08	-2144.05	-5030.71	-7423.99	-4701.42	-3143.65	-1871.53	-690.796	3481.68	-6665.78	-6419.75	266.854	803.825	-251.607	-2374.89	-2908.47	-332.913	-1095.04	-394.176	7869.08	425.926	3708.54	-2198.11	1468.4
71	fret	0.704864	0.754337	0.696939	0.698921	0.751372	0.692974	0.814541	0.718728	0.669171	0.672148	0.696939	0.762243	0.701893	0.75829	0.700902	0.779031	0.803697	0.784954	0.827349	0.862778	0.469792
72	donor	6912.74	12012	8296.92	5681.12	7453.4	4029.98	8409.09	6941.91	2648.05	4709.73	8483.12	8270	6224.02	12911.6	3300.88	6233	12054.6	9337.85	3307.61	6854.42	6212.81	9254.85	6421.44	7206.63	10798.3	9209.98	10073.7	8606.51	6078.2	10392.2	10571.7	4139.91	5820.21	7213.36	8536.96	8877.96	13418.6	11123.6	6513.42	9109.03	6982.29	11233.5	15563.3	11574.5	10980	16379.9	10740	5800.02
72	acceptor	72489.6	75626.7	62351.3	65306.9	66238	69468.9	78079.3	72152.9	72420	78373.6	78532.2	79828.9	78747.7	74231.6	73558.8	74903.6	65759.6	77305.3	73108.9	81584.1	74653.6	78527.4	74952.6	86602.1	71509.9	68015.9	77823	74596.9	84016.3	79808.5	84610.7	73154.5	73916.7	81090.2	64704	74083.9	76800.3	67631.3	78013	82587.8	89823	72877.2	70621.4	72353.1	75320.7	67924.2	67629.7	74679
72	fret	0.91317	0.862862	0.88223	0.920219	0.898971	0.945005	0.902929	0.912385	0.964836	0.943468	0.902139	0.906088	0.926455	0.851445	0.957241	0.92334	0.844882	0.892616	0.956479	0.92256	0.92334	0.894208	0.921	0.92334	0.868537	0.880626	0.885434	0.896591	0.932665	0.884633	0.88863	0.94654	0.927233	0.918655	0.883833	0.892616	0.851445	0.858818	0.92256	0.900556	0.92801	0.866107	0.819175	0.862049	0.872578	0.805733	0.862862	0.92801
73	donor	22578.1	28688.2	8820.02	6195.99	36501.4	63032.2	62527.1	63512.5	73156.1	63723.3	59663.8	56259.4	73507.4	62494.8	62933.4	73511.2	61967	69409.9	70435.3	59925.9	73767.5	66009.3	69373.9	61124	70459.9	71096	62137.9	63351.1	62280.3	68477.7	63719.5	62337.2	66442.3	60803.1	67287.2	65369.5	66051.1	65728.3	77295.3	68145.4	69252.4	66007.4	63073.9	69882.7	62804.3	60079.7	76182.7	74656.1
73	acceptor	44217	42152.4	54679.2	47885.1	12436.2	-2643.44	-2483.86	-5173.99	-2381.96	119.38	-2389.85	-4537.52	1308.73	-1065.53	-3653.72	-4949.35	-3373.52	-2033.73	-3177.44	-2447.85	-1614.45	-4343.6	590.924	-6660.81	-2121.1	-5505.8	2864.85	-2205.39	-2066.73	-5258.5	-35.445	-3326.39	-3706.03	-5815.12	1248.98	-2068.26	109.353	-5063.18	-1661.07	-2384.15	4223.78	-5482.37	2693.4	-2594.44	-2117.24	4620.35	-7682.83	-3025.15
73	fret	0.661608	0.594823	0.860762	0.885516
74	donor	30040.2	29900.5	24633.1	25645.7	32024.6	33584.7	32298.3	28776.7	31700.1	22455.9	20888.4	21462.1	17787.6	23500.4	18303.3	25170.9	22298.2	19016.8	24083.9	20200.2	22417.5	22075	14697.5	16462	30352.4	22092.2	13889.2	15692.9	15350.5	19968.1	17663.4	10643	15814.7	23921.3	16328	13273	15035	17358.6	17866.1	16903.3	14611.7	19888.8	54115.5	18961.2	16283.8	19239.1	16509.4	103552
74	acceptor	77427.5	80960.5	85307.7	90361.4	86222.5	86758.2	76693.5	83027.5	93869.8	82292.7	77187.7	87987.5	89321.6	76188.3	79762.9	63018.1	87213.9	83047.8	87597	77057	69627.6	78111.1	81171	87629.4	76900.5	92098.1	93567.3	89386.3	82432	87700.6	84016.8	87747	90548.8	84494.9	88202.8	91831.3	100496	84016.8	92214.2	96348	94157.7	82390.8	27776.4	83897.5	88567.3	79581.7	87002.1	12575.7
74	fret	0.72084	0.729894	0.775727	0.779206	0.72876	0.72084	0.703966	0.742407	0.748118	0.786201	0.787366	0.803735	0.834467	0.764193	0.813145	0.714074	0.796705	0.813145	0.783874	0.79203	0.75614	0.779206	0.846403	0.841621	0.717454	0.806084	0.870471	0.851196	0.842815	0.814324	0.826151	0.892359	0.851196	0.779206	0.844011	0.874104	0.869261	0.828524	0.838041	0.851196	0.865636	0.806084	0.339303	0.815504	0.845206	0.804909	0.840427
75	donor	50045.1	50968.9	43725.2	49185.7	53339.1	46730.8	47622.4	51602.3	56897.5	44796.3	53288.7	46825.6	42289	41177.5	50851.9	44045.9	49216	46053	51297.7	44778.2	63197.2	98869.3	106176	99204.1	112592	97778	112790	107368	102305	108520	104231	104578	121462	103023	107087	101695	109671	106022	119838	105308	97963.5	109088	108564	114081	118801	117857	107358	107588
75	acceptor	47947.5	51335.9	50540.6	45408.5	45598.9	51351.6	47145.3	49614.2	59478.9	52564.7	50897.4	53536.1	47938.4	51160.3	46665.2	62744	57253.4	46195.7	59985.4	59886.4	27197.3	-7302.09	-311.442	-2096.61	-957.588	1012.09	2208.43	209.193	1349.85	-1434.77	3798.58	3855.51	4071.32	1242.21	237.658	4835.14	-4547.57	1459.71	1824.73	-667.821	-627.664	966.502	4134.72	3813.48	1101.15	1026.02	-3407.76	1866.42
75	fret	0.488837	0.501843	0.535814	0.479827	0.460793	0.523831	0.497842	0.489838	0.510841	0.539806	0.488837	0.533817	0.530822	0.553773	0.478826	0.587648	0.53781	0.500843	0.538808	0.571716
[truncated: 1,162 more columns]

## Sheet: 389-389_R304W_inter_liposome
1	donor	33247.1	40762.2	46116.6	44895	35622.5	49958.9	29714.6	36694	40849.3	40923.6	50836.7	57578.9	47378.5	29864.7	34668.8	42576	34005.5	35388.5	44259.2	46787.9	58761.8	40229.7	44552.9	43097.3	43876.7	42890.7	35275.5	41440	40276.5	47194.5	47536.6	36240.5	41252.8	42900.4	44188.2	36874.7	40678.3	87182.8	75799.5	83476.1	67250	73132	91409.2	71700.7	60783.8	71636.1	72139.6	80414.8
1	acceptor	31869.9	30325.6	32076.1	37710.9	30949.8	38392.5	30141.3	37039.8	45131.1	27747.1	19697.5	37349.1	33262.9	33797.4	43840.9	33840.8	35682.6	32707.3	32520.1	37286.4	29585.6	21273.2	31280.5	41497.8	30375	27998.9	30689.1	33437.6	25252.3	31303.8	36475.3	31881.5	45473.1	25482.8	35785.7	38315	35143.7	9867.96	-4183.89	-3220.02	993.044	-4091.87	475.461	-5573.26	1501.61	3267.82	1780.79	-2015.63
1	fret	0.48926	0.426726	0.410015	0.456965	0.465195	0.434671	0.503133	0.502059	0.524872	0.404188	0.279639	0.393601	0.412942	0.530383	0.558409	0.442732	0.511771	0.480821	0.423755	0.443741	0.335238	0.346066	0.412942	0.49032	0.409041	0.394559	0.465195	0.446776	0.385029	0.398399	0.433671	0.468299	0.524872	0.372789	0.44779	0.509604
2	donor	10343.9	2678.18	5528	4016.24	3623.99	9115.57	6631.28	10982.4	6162.67	7831.91	5909.76	5994.7	5008.81	6888.01	5406.79	7057.9	5003.09	6361.19	5965.12	7921.62	1400.25	136.636	1641.71	3887.4	6226.62	3499.92	2122.73	1959.53	9086.94	6503.39	8853.11	5404.89	2091.23	7155.24	4926.74	1021.36	7926.39	9322.67	3285.18	6616.01	6192.26	10420.2	7752.69	8505.71	6255.25	3883.58	12524.7	3120.07
2	acceptor	56860.2	49720.5	58765.5	55696.7	53439.8	46524.1	59539.3	44346.8	36230.8	50473.1	43458.1	46101.9	51984.6	41963.1	59128.1	50914.7	43339.9	58199.7	49063.1	48967.1	41839.9	54593.2	48311.8	51569	45778.8	43803.1	48342.4	44406	46259.3	44924.3	46359.8	51448.5	41745	48519.3	57572.3	58932.1	49016.2	47782.8	47021.3	62892.8	62280.2	53241.1	48380.9	44514.7	49772	47620.5	42659.5	50376
2	fret	0.846003	0.949128	0.91381	0.932362	0.936369	0.835856	0.899968	0.801607	0.854435	0.865289	0.880236	0.88519	0.912187	0.858605	0.916241	0.878582	0.896695	0.901602	0.891773	0.861115	0.967304	0.997685	0.967304	0.929953	0.880236	0.925932	0.957845	0.957845	0.835856	0.873609	0.839245	0.904866	0.952303	0.871117	0.921093	0.982952	0.861115	0.836704	0.934767	0.904866	0.90975	0.836704	0.861951	0.839245	0.888485	0.92432	0.772847	0.941962
3	donor	21387.2	17243.7	11066.8	21735.6	21281.6	16943.2	17830.4	16019.2	16965.5	9175.74	23059.2	26270.8	17114.2	12934	12481.6	12900.4	24210.2	11252.3	12128.3	20020.4	18051	20730.1	13216.9	13448.7	16235	13223.3	14516.5	13904.3	8496.35	16259	11957.2	16756.1	12711.8	17676.9	20523.9	17907.1	20448.8	17529.8	25115	17847.9	21454.3	20316.1	18244.4	8354.08	15921.7	18292.3	13945.8	13375.2
3	acceptor	58835.7	54152.4	56533.4	51068.7	55971.3	56830.1	50289.3	46554.9	59538.9	49565.2	56301.1	58627.8	56561.3	59074.1	60714.5	60392.9	64022.8	52430.4	56825.1	70288.9	70539.4	76613.3	67821.8	59886.5	59191.3	66058.1	68223.6	51363.3	63811.2	63671.8	58443.5	50886	58252.2	66849.5	75456.2	55732.9	57189.2	59761.8	49776.9	63202	57314.2	67178.4	63389.2	57912.8	53313.9	54047.9	67030.4	63293.2
3	fret	0.733141	0.758817	0.836762	0.70096	0.725044	0.77058	0.737784	0.743603	0.777712	0.844119	0.708954	0.690733	0.768217	0.820918	0.829434	0.824563	0.725044	0.823347	0.824563	0.778899	0.796795	0.787229	0.836762	0.816069	0.784845	0.833094	0.824563	0.787229	0.882577	0.796795	0.830653	0.75178	0.820918	0.790811	0.786037	0.756469	0.736622	0.772946	0.664848	0.780087	0.727354	0.768217	0.776525	0.873826	0.77058	0.747103	0.828215	0.82578
4	donor	9471.43	14151.3	19033.6	17158.7	13606.4	18760.7	21340.1	19619.1	17829.1	23302	21298	17464.9	18408.8	18392.2	18489.4	21491.7	22022.8	15065.5	18656.3	15624.9	5254.49	14810.8	13071.6	9128.97	15069.1	13382.9	9518.59	4165.43	11770.7	11004.5	14273.2	9968.44	14484.3	10620.7	16315.6	16105.9	13826.2	11676.4	16774.9	4809	12715.4	8949.75	10160	11833.8	10189	9438.05	14060.6	14408.8
4	acceptor	52653.4	48525.3	46889.7	48350.8	48016.7	47283.5	52826.7	53675.2	59246.4	41734.9	53914.7	49200.7	49849.1	52285.9	60919.8	52465.7	52675.5	57131.8	57415.7	59644.2	59066.8	50257.4	46463.4	54557.7	56502.2	58052.1	49747.9	56028.9	54636.7	44540.3	51618.5	56148.2	52238.2	52421.5	59304.2	52521.3	53951.2	54410.2	51614.5	59252.1	60548.4	61661.3	57311.8	59747.6	48165	53193.9	52805	53331.9
4	fret	0.847798	0.774546	0.711404	0.737819	0.778981	0.71598	0.71232	0.732369	0.76832	0.641507	0.716894	0.737819	0.730554	0.739627	0.767429	0.70957	0.70498	0.791348	0.754913	0.792228	0.918386	0.772769	0.780752	0.85632	0.789586	0.812372	0.839202	0.930729	0.822801	0.801887	0.783407	0.849509	0.782522	0.83145	0.784291	0.765646	0.795746	0.823667	0.754913	0.924979	0.826265	0.87329	0.849509	0.834899	0.825399	0.849509	0.789586	0.78694
5	donor	73628.9	71235.6	70734.8	63300.8	58820.2	73436.5	62716.1	56459	77670.4	56695.9	97048.5	58469.9	29851.7	47268.3	51958.7	48696.9	49466.7	59683.8	61561.4	68958.3	68146.6	70942	77453.2	68901.6	56819.2	48043.1	51837.8	61489.8	71541.6	41593.5	12605.3	29595.1	32649.6	36700.9	38358.9	45166.2	71215.9	78045.4	78553.6	83224.2	76500.9	86737.7	94951.3	60808.8	71011.1	64411.1	77305.2	87732
5	acceptor	16877.7	10225.1	16468.7	21666.7	18996.3	31284.3	29786.4	27090.8	19047.5	25003.9	19997.2	35801.3	36809.9	38998.7	26112.5	27447	31332.6	33642.5	32935.6	24059.1	29278	26355.3	20160	22366.4	31621.9	29324.3	26916.2	22650.4	26494	39031.5	52791	29831.5	25027.6	31389.8	23156.5	20169.5	13091.4	3781.73	1857.31	17013.4	10691.4	8108.79	2270.44	12408.7	3889.54	4047.62	4402.86	6484.52
5	fret	0.186373	0.125909	0.188822	0.255064	0.243924	0.298832	0.322185	0.323988	0.197017	0.305973	0.170978	0.379596	0.55172	0.452475	0.334019	0.360805	0.388138	0.360805	0.348731	0.258511	0.300614	0.270641	0.206923	0.244777	0.358009	0.37865	0.341355	0.2689	0.270641	0.483745	0.807138	0.502257	0.433642	0.461486	0.37676	0.308662	0.154976	0.0462989	0.0232764	0.169369	0.122807	0.0854438	0.0232764	0.169369	0.0521256	0.0594495	0.0535867	0.0690385
6	donor	12933.7	11093.5	16976.9	18840	15490.5	8486.14	18261.1	10930.4	14229.3	16014.3	15083.9	13553.9	18959.4	7921.01	16248.6	9271.81	14387.8	16489.9	12462.7	17427.1	11890.7	16698.9	16184.3	19938.1	19393.6	18100.2	22910.7	21566.8	18389.7	20843.2	14038.7	16875.8	19788.7	25159.8	20914.4	20098.9	14422.3	22060.7	17135.4	16448.5	13926.1	22857.9	19556.7	18141.6	14240.8	11332.5	13335.7	15812.2
6	acceptor	52206.5	61634.8	47167.5	57210.9	55136.9	50796.1	62897.5	50328.2	49377.6	47482.5	61683.6	56407.4	47897.4	49835.8	62210.7	60358.7	51980.4	51090	58354.6	57468.3	49703.8	45308.4	56609.7	50969.2	56578.3	58582.8	46193.5	61463.8	46748.5	68289.7	54158.4	53101	49779.7	49923.9	44690.4	59186.4	56338	52240.4	48365.5	65894.3	52816.1	58444	52678.2	51241.8	52332.1	56777.8	63888.1	49413.5
6	fret	0.801579	0.847848	0.73526	0.752334	0.780469	0.856905	0.775444	0.821691	0.776449	0.747312	0.80359	0.806606	0.716182	0.862944	0.792531	0.86697	0.783484	0.756353	0.823703	0.767405	0.806606	0.730239	0.777454	0.719194	0.744299	0.76439	0.668016	0.740281	0.717186	0.7664	0.794541	0.758362	0.715178	0.665007	0.681057	0.746307	0.796552	0.703133	0.738272	0.800573	0.791525	0.719194	0.729235	0.738272	0.786499	0.833762	0.827726	0.757357
7	donor	60858.9	74438.1	65326.3	66764.3	58943.5	56439.6	64374.5	60228.4	66341	54148.8	62873.4	59531.9	54647.2	57565.4	60186.4	62098.8	48873.9	59186.6	53278.2	59985.2	59057.5	56409.5	57100.1	66560.2	68304.5	54509.1	65596.5	55145.6	63470.9	69919.7	54464.1	55337.7	61930.7	64758.8	66845.4	63155.6	56346.5	70045.8	78362.1	65725.6	73294.3	60525.6	64440.6	62471.1	60985	64806.9	67349.8	55145.6
7	acceptor	41644.7	21689.2	24104.3	36108.4	31500.8	35635.6	25134.8	54992.3	26124.2	42974.8	41507.7	28001.9	22708.9	5958.13	34091.8	27290.6	28074.1	25938.1	30086.7	59150.1	35305.8	49072.1	30168	17316.6	27407.5	37930.6	48599.7	35121.6	35587.7	39572.2	25832.8	49894.8	16358.9	40572.1	33645.5	40232.3	31452.9	29985.9	21569	50298	45354.5	37972.6	22858.9	18667.8	34577.2	35584.6	45227.5	51410.3
7	fret	0.406016	0.225838	0.269331	0.350608	0.348189	0.387475	0.280925	0.477325	0.282206	0.442244	0.397933	0.32001	0.293675	0.0942906	0.361428	0.305034	0.365012	0.305034	0.361428	0.496575	0.374515	0.465392	0.345766	0.206905	0.286041	0.410609	0.425408	0.388644	0.359032	0.361428	0.32125	0.474083	0.209639	0.385113	0.334798	0.388644	0.357832	0.299999	0.216408	0.433296	0.382766	0.385113	0.26154	0.229857	0.361428	0.354226	0.401404	0.482707
8	donor	354825	366240	360198	371072	380453	404850	389480	401140	389631	370617	369355	380738	398036	392848	388303	301669	308988	297085	299603	291074	330428	291964	284347	292889	302793	306731	366644	269320	-275.058	-2043.59	5718.65	-970.95	1700.53	-5549.52	308.747	128.155	-659.589	-6757.6	-7327.4	-3726.5	-4582.74	1491.92	-5020.21	-1014.54	-1657.5	-6480.49	-9768.47	-1912.82
8	acceptor	27842.9	33372.3	34469.2	15198.5	12032.7	15904.1	12606.8	6103.48	9059.85	7319.91	5577.26	8970.83	5346.06	13616.7	4274.82	10682.1	3784.62	3652.04	482.675	6620.68	4218.75	3941.19	7882.91	5136.69	6150.59	11397.7	3465.25	3830.13	3124.01	2591.46	3234.18	9531.23	10073.8	4472.99	588.226	4686.61	9388.69	1541.36	11301.7	9260.48	5873.88	4477.83	10934.4	7989.44	12832.4	7698.98	10914.5	4430.15
8	fret	0.0725447	0.0833653	0.0875651
9	donor	29398.1	27677.3	29844.8	33168.7	21598.5	19452.8	23121.4	20421.5	17530.9	20279.1	20974.4	23380.9	23816.7	27412.3	19763.6	16214.5	17591.3	21305.2	24348.5	20055.1	21632.9	18044	18099.5	23045.9	20760.1	19635.6	22048.2	22733.3	32761.9	27020.6	20020.7	21759.1	20980.4	20704.6	16543.4	22558.2	21643.8	23048.3	24433.6	23046.5	22530.5	24727.5	21204.4	22940.3	20058.8	25464.5	29512.2	26127.3
9	acceptor	54857.9	58400.5	55202.5	50809.6	52148.2	56449.9	59508.9	58803	56352.8	55362.2	49938.9	51118.2	66143.9	61170.7	56924.6	64019.5	58674.3	57968.5	55181.8	61422.5	54445.9	55112.1	55726.2	66280.5	56805.5	66961	58525.8	60464.5	57196.2	54453.5	54400.5	59843.9	60164.2	54139.2	63988.2	60745.4	61269	49187.1	64782.4	56005.8	62399.7	56854.3	61966.9	61422.1	64891.8	63860.3	54591.2	66842.4
9	fret	0.650922	0.678914	0.648985	0.605158	0.706721	0.743828	0.720088	0.741933	0.76273	0.731496	0.703853	0.686603	0.735294	0.690443	0.741933	0.797474	0.769326	0.731496	0.694279	0.754235	0.715322	0.75329	0.75518	0.741933	0.732446	0.77309	0.726743	0.726743	0.635398	0.668318	0.730545	0.733395	0.740985	0.722936	0.794668	0.729595	0.739089	0.680838	0.725791	0.708632	0.734345	0.697153	0.744775	0.727694	0.763673	0.715322	0.648985	0.719135
10	donor	23450.4	24527.2	21710.3	17940.8	13951.8	55503.2	71218.1	68734	63055.1	63028.5	66498.8	67133.6	68612.9	60064	63439.9	55219.8	55516	55904.8	63373.9	55087.9	57285.6	67837.3	68182.8	74567.4	69581.4	73903	60191	62698.8	75796.6	77617.4	73912.9	84709.7	85259.8	79072.1	88617	85674.2	83240.2	92223.1	96689.5	88514.6	93886.4	89537.2	95993.6	83714.6	90491.9	82426.3	93959.3	88059.9
10	acceptor	67390.3	72936.8	70442.5	80872.3	67197.3	27241	17110	18016.2	19817.5	23982.3	15068	21351.8	18984.9	19691.8	13993.7	17196.3	28586.2	21419.9	15050.5	23943.2	22998.8	18892.7	15559	12534.6	15899.8	9628.6	16118.8	15958.7	11757.1	10848.2	18721.1	-387.386	639.876	9603.78	2836.8	-507.578	-996.538	-2263.92	-1219.55	-1138.4	-1834.89	-5531.15	2804.51	6522.62	-4862.93	2641.89	-4224.11	2719.92
10	fret	0.742041	0.747955	0.764677	0.818094	0.828308	0.329611	0.193892	0.207048	0.239406	0.27597	0.184607	0.240684	0.216183	0.247044	0.180608	0.236835	0.340318	0.277214	0.192569	0.303063	0.285886	0.217483	0.185937	0.144092	0.185937	0.115016	0.21097	0.203114	0.134467
11	donor	16226	12242.9	13338.4	11124.8	10571.8	11032.1	10694.3	14930.2	16843.5	22005.6	23695.1	19161.8	16779	12656.5	12824.3	11258.7	11560.3	13860.9	11270.7	18838.9	12254.3	15593.7	13850.3	11393.9	11463.3	17155	15376.3	10957.7	10838.7	9703.66	11012.2	16539.7	15733.9	13563.5	14423.2	13498.4	17140.2	13953.7	9477.06	13860.9	15631.2	12257.1	14380	15198.6	15672.3	13317.8	16054.6	16163
11	acceptor	39614.6	45036.6	46156.5	38997.9	45313	49523.6	45647.4	49338.9	43385.4	29010.6	39123.6	39842	39313.9	42885	40445.6	39812.7	34409.9	42163.1	40208.1	38774	42300.8	35244.3	36297.4	35357.5	44218.9	47781.6	36096.7	43744.5	42511.8	44292.9	47209.4	32384.8	39099.6	35098.1	37067.5	40212.1	41742.1	50484.1	43536.4	43937.1	32885.1	39517.5	42846.3	39707.5	39553.4	39257.8	42216	37008.6
11	fret	0.709352	0.786601	0.775396	0.778451	0.811072	0.818221	0.810052	0.767253	0.720509	0.569057	0.6224	0.674917	0.701243	0.772342	0.759113	0.77947	0.748945	0.753011	0.781507	0.672894	0.775396	0.693138	0.723553	0.756062	0.793735	0.735736	0.701243	0.799853	0.796794	0.820263	0.811072	0.661771	0.713408	0.721524	0.719494	0.748945	0.709352	0.783544	0.821284	0.76013	0.677953	0.763182	0.748945	0.723553	0.716451	0.746912	0.724568	0.696177
12	donor	2847.8	5907.5	5828.22	4948.71	4117.52	3204.56	3426.3	8943.66	935.181	6814.26	1864.24	3823.93	8451.88	3463.46	5338.92	7733.41	4904.12	1654.89	3893.3	4681.14	573.468	5376.08	8712.02	5519.77	5848.04	4134.86	2002.98	3700.06	2782.15	2934.51	1996.79	4796.35	5922.36	4702.2	104977	106085	101223	84095.8	89808.9	93288.5	103565	101389	90342.8	94981.9	100094	104284	104266	97364
12	acceptor	93538.4	100120	83562.7	92445.1	90004.4	87255.7	93253.6	97300.6	94186.3	92524.9	93165.7	94288.1	96735.4	99039.9	90626.8	99223.3	88506.5	80847.5	92882.7	92481.5	95631	90679.2	87490.5	87586.4	89333.9	100084	99044.2	88260	99322.7	99299.6	87038.5	92372.7	94750.3	103299	-200.311	-4368.03	-852.712	-3564.27	3343.89	636.621	1411.63	-2824.28	-2905.03	3177.33	-3539.55	1128.11	-4617.88	-7623.44
12	fret	0.970297	0.944725	0.934505	0.948814	0.955972	0.964156	0.964156	0.916122	0.989753	0.93144	0.980534	0.961087	0.919185	0.966203	0.944725	0.927354	0.947792	0.97951	0.960064	0.951882	0.993851	0.943702	0.908978	0.940636	0.938592	0.960064	0.980534	0.960064	0.972344	0.97132	0.977462	0.950859	0.941658	0.955972
13	donor	13418.6	24420.9	29946.8	22295.3	18004	23112.1	21357.9	20553.4	18644.4	18885.7	26939.4	27125.1	19875.8	16744.7	26889.9	21478.5	20708.1	9148.93	20293.5	20856.6	14025.1	20841.2	23990.8	20346.1	7178.05	22295.3	15869.1	15931	13177.3	22660.4	27777.9	17078.8	21961.2	14987.3	18808.4	10219.5	19309.6	22901.8	17809	23304	22208.7	24730.3	32616.9	26821.9	16246.6	21175.3	31447.4	20231.6
13	acceptor	127600	151616	138350	136424	138419	151363	137515	139845	163382	152078	129281	160968	157940	133776	136852	140995	163046	130475	132869	162240	150010	144037	151216	142629	137988	125955	150612	126717	152388	138560	144581	140232	135683	154385	143059	125740	139264	142080	135099	141706	144048	129799	157511	147425	147536	150195	142841	149295
13	fret	0.904676	0.860784	0.822514	0.859718	0.885366	0.867187	0.865052	0.871459	0.897159	0.889652	0.827815	0.855454	0.88858	0.88858	0.836305	0.868255	0.887508	0.93484	0.867187	0.886437	0.914354	0.873597	0.862918	0.874666	0.951063	0.850129	0.904676	0.88858	0.920816	0.859718	0.83843	0.891795	0.860784	0.911126	0.884295	0.925127	0.877874	0.860784	0.883224	0.858652	0.866119	0.839492	0.828875	0.845872	0.900379	0.876804	0.819336	0.881083
14	donor	1669.02	-2672.38	-917.963	-927.667	-527.878	-5829.94	258.116	-1606.92	1038.29	-425.019	-2119.27	2354.1	-438.604	-1684.55	-2658.79	-4556.82	2340.51	-2179.43	-675.373	1929.08	2682.08	774.349	-1742.77	-685.076	-2726.72	-1496.3	-1236.24	4028.94	6047.3	411.434	-2260.94	4813	560.869	1641.85	-4364.69	-2200.78	-430.841	1696.19	-3070.23	-3681.56	1589.45	-1242.06	-770.468	2431.73	-591.921	851.978	-17.4664	-1806.82
14	acceptor	30902.2	27688.6	28530.9	33866.1	28789.6	30145.9	27540.2	33492.4	27758	37155.6	34300.2	33954	33863.9	28374.5	39295	28113.8	29379.5	32860.1	28504.1	30599.7	38761.4	34722.8	30049.7	28680	31236.1	32271.9	26083	35362.5	31838.6	37894	32716.9	34789.7	32474.9	34057.5	30527.7	36119.1	25498	28843.7	29018.8	27217.3	33607.6	33916.4	44518.4	33822	34175.4	41857.4	34205.2	34625.7
14	fret	0.949145	1.10664	1.0329	1.02791	1.01894	1.2401	0.991027	1.05084	0.964104	1.01196	1.06579	0.935182	1.01296	1.0628	1.07277	1.19331	0.926206	1.07077	1.02393	0.941167	0.935182	0.978065	1.0618	1.02492	1.09568	1.04885	1.04984	0.897277	0.840403	0.989033	1.07376	0.878321	0.98305	0.954132	1.16642	1.06479	1.01695	0.944159	1.1186	1.15646	0.955129	1.03788	1.01795	0.933188	1.01795	0.980059	1.001	1.05483
15	donor	24665.6	23151.8	19094.1	20093.6	23059.5	18054.8	17964.2	26094.2	28353.9	20068.3	20363.4	23772.9	20828.7	17710.7	27349	27122.7	17212.8	28350.3	24026.4	20457.5	21087.7	20826.9	23738.5	27711.1	24629.4	17191.1	17870.1	24287.1	20750.9	23651.6	22601.4	26762.3	25717.6	24165.8	19977.7	26778.6	20303.6	24651.1	20057.4	22083.5	21288.7	19367.5	17075.2	20892.1	23023.3	20788.9	22650.3	29071
15	acceptor	43029.6	49179	44688.7	46285.4	45134.9	50841.2	45854.9	49772.9	49798.8	55237.9	48073.3	47866.4	43180.6	59971.3	57544.9	52021.6	48406.8	53155.4	50248.9	52364.9	50480.2	45629.9	55981.1	48475	50069.4	51350	49277.5	48946.2	50129.9	51007.4	51976.2	46387.6	50286.7	52279.9	58429.1	51768	48191.3	54291.9	41642	43004.5	55563.2	46128.7	52534.2	50594.1	43087.4	46235.2	44170.5	47963
15	fret	0.636035	0.679855	0.700752	0.697768	0.661934	0.737541	0.718653	0.655959	0.637031	0.733565	0.702741	0.667909	0.674878	0.772309	0.677864	0.656955	0.737541	0.651975	0.676869	0.718653	0.705725	0.686821	0.701746	0.636035	0.6699	0.749465	0.733565	0.667909	0.707714	0.682841	0.696773	0.634041	0.661934	0.683836	0.745491	0.658947	0.703735	0.687817	0.674878	0.660939	0.72263	0.70473	0.754432	0.707714	0.651975	0.689807	0.660939	0.623078
16	donor	27335	29241.3	29500.3	16422.1	15377.1	22818.9	20903.3	23698.6	32119.2	33858.4	27261.5	24504.8	22721.5	36178	25770.2	24367.1	25505.8	19722.4	24541.6	28521.4	28137.5	30936.5	32049.4	22936.4	34892.4	32864.8	21132.9	26442.4	35636.2	22447.9	30563.6	28998.9	35347.9	21417.6	30956.7	29733.5	18879.5	25004.4	21373.5	23087	17289	19334.9	26392.8	23676.5	30110	17309.2	27410.3	25013.6
16	acceptor	59747.8	68479.6	70090.6	64851.2	74852.4	60702.5	71138.7	69075.6	58289	65059.4	69441	65065	59533.7	74866.6	70793.1	62401.7	75407.6	67745.6	61293.8	64482.4	73209.7	58460.6	67619.1	52717.4	57046.5	58513.5	63787.9	58594.7	56260.8	68500.4	60969.7	53693.4	70597.9	59391.1	60065.4	62172.5	66955	68262.2	59813.6	62315.1	73127.5	56378.3	64951.5	67881.2	59939.7	65011	61504.4	68171.1
16	fret	0.685739	0.70043	0.703836	0.798137	0.829394	0.726698	0.773224	0.744024	0.644536	0.657802	0.717521	0.726698	0.723251	0.674515	0.73361	0.718665	0.747508	0.774402	0.71409	0.693635	0.722104	0.654477	0.678997	0.697029	0.620454	0.640135	0.750998	0.689119	0.611773	0.753328	0.665583	0.648948	0.666697	0.734764	0.660022	0.676755	0.780327	0.732456	0.737075	0.730151	0.808901	0.745184	0.710666	0.741705	0.665583	0.789805	0.691376	0.731303
17	donor	27003	24268.9	26041.8	30087.9	54025.9	97291.6	106176	106074	102927	3308.38	2541.58	-1167.34	4495.28	329.551	-2535.07	-830.165	284.685	2436.89	2294.13	6313.03	320.035	447.834	900.571	94.3452	-3044.91	-98.7144	515.813	1557.25	2114.67	-132.704	1714.96	1399.54	-3789.95	3389.95	-1524.91	636.814	1424.01	92.986	2771.34	389.372	-129.984	-187.086	-159.895	200.392	-4798.76	1097.71	2445.05	-365.191
17	acceptor	72042.4	71603.2	74780.1	77826.2	71487.1	20152.5	3778.76	4032.8	2926.36	8138.54	12599.1	3959.8	5780.61	7539.96	4512.62	5866.71	3779.42	9374.29	4283.71	2924.24	-3605.09	-857.219	-56.097	9227.07	8327.69	1672.46	2445.61	12667.9	8840.06	6888.74	6154.33	7741.02	8188.48	2779.44	3302.32	4198.92	5446.33	1622.65	6125	8053.06	8954.83	7586.22	10884.7	2658.63	4898.39	6225.17	3590.76	8184.21
17	fret	0.727419	0.746973	0.741823	0.721253	0.569547
18	donor	34330.6	33993.9	34757.1	27319.5	34934.9	38727.9	31206.6	30401.6	27902.8	43202.7	97848.9	84763.4	91496.4	95017.7	94030.7	90160.3	84744.6	89378.2	90292	88063	82187.3	93029.1	93121.1	91017.6	87554.9	92926.7	87232.9	85227.6	84539.7	79201.3	74563.5	78323.1	85576.8	85438.8	88815.8	78567.8	84782.2	74628.3	90662.1	82651.5	100544	78670.2	102008	79788.9	87013.3	85995	84242.7	88723.8
18	acceptor	54096.8	50886.4	55459	53359.8	45289.7	45793.6	47792.4	57594.5	63942.2	31138.7	-3968.48	4722.05	-4058.93	1304.47	-7850.96	-6360.6	-5074.79	-3090.11	95.163	-3232.85	-5377.51	-183.563	-2068.69	-2604.35	9229.53	-1786.12	1548.48	-4165.3	773.605	-2552.19	-1411.3	-5384.93	-7122.66	-12011.3	-8345.5	-140.478	-1731.76	-4157.48	-9336.55	-1270.05	-3228.43	-2044.67	-3405.91	957.287	-5195.05	-4258.5	-2559.88	-5030.34
18	fret	0.612154	0.599084	0.615171	0.661493	0.56494	0.541877	0.605115	0.654437	0.695799
19	donor	36508.3	32306	33741.1	50306.9	16335.9	20880.7	27076.4	43628	25913.2	35054.4	43712.5	27578.2	34702.6	31982.3	31522.7	37793.5	45644.8	25514.6	27432.9	17611.6	28985.3	31790	40232.4	43252.8	39669.5	44720.9	45860.6	41766	21682.7	33220.5	28131.7	22747.4	17911.8	22559.8	21312.2	23436.8	17030	16218.6	47169.1	27517.3	44978.8	18404.3	31152.2	22559.8	21621.7	7560.57	25767.8	17414.6
19	acceptor	58717.4	65624.5	83457.6	61679.6	65857.5	70835	67899.1	55875.4	75524.9	70323.7	65664.9	59904.2	62697.1	64952.5	60833.4	63999.1	58675.6	57376.5	71764.4	65811.9	61145.1	67994	66650.7	57921.3	71692.4	66623.4	69202.9	58620.7	70163.4	65163.1	68243.5	82747.4	62031.4	53060	62806	53601.6	78838.9	67942.5	70269.5	57431.4	70665	60134	67314.4	65520.8	64537.3	67214.4	63567.6	57752
19	fret	0.616412	0.669943	0.712192	0.550329	0.802033	0.772627	0.715188	0.561363	0.744195	0.667109	0.600648	0.684205	0.643412	0.669943	0.658665	0.628448	0.562599	0.691523	0.722724	0.78884	0.678446	0.681321	0.623076	0.572561	0.643412	0.598052	0.60195	0.583927	0.764634	0.662876	0.707719	0.783944	0.775845	0.701793	0.747307	0.695909	0.822204	0.807033	0.598052	0.675642	0.611122	0.766226	0.684205	0.744195	0.748868	0.898476	0.712192	0.767822
20	donor	583.69	2682.44	-3402.16	2693.36	-536.006	1879.53	314.69	377.502	5738.39	11637.3	9441.58	3402.05	-2660.7	658.792	-4961.54	-2608.81	7891.76	-45.7981	350.193	3086.62	7651.43	-1756.75	-2868.25	-4112.21	4209.05	4539.5	1626.92	-881.474	2566.37	3311.93	1398.88	-1590.16	-279.295	-0.73704	2502.2	2510.39	5999.2	41559.1	66099.6	82661.6	63088.7	81020.2	71374.5	70080	68609.4	74276.1	77739	65653.1
20	acceptor	95904.3	89768.4	81457.5	90812.3	101906	97858.7	84607.2	78340.2	84574.3	85130.3	92816.7	87450.2	80717.1	89587.1	96390	102048	93581	90604.5	92454.9	90343.2	84829.2	86529.6	100803	87569.8	90752.4	99344.3	83270.2	83753.5	93999.1	93165.3	82820	90600.6	89565.3	94796.5	85868.3	106243	99250	49995.3	1981.2	-71.181	-5980.9	-4957.12	-2647.75	3412.42	-6464.87	6188.48	-24.089	1532.74
20	fret	0.994024	0.971113	1.04382	0.971113	1.00498	0.981075	0.996016	0.99502	0.93624	0.879426	0.907338	0.962146	1.03386	0.993028	1.05377	1.02589	0.922288	1.001	0.996016	0.967128	0.917305	1.02091	1.02888	1.04879	0.956168	0.956168	0.981075	1.01096	0.973105	0.966131	0.983067	1.01793	1.00299	1	0.972109	0.97709	0.943215
21	donor	7908.75	15982.5	22391.2	21000	17317.5	19961.2	21641.2	20838.7	27153.7	26212.5	21618.7	33525	30052.5	12843.7	12697.5	20351.2	24937.5	22398.7	27153.7	18480	13548.7	30386.2	13353.7	28233.7	13203.7	28653.7	20876.2	14370	3952.5	14527.5	20553.7	12678.7	13796.2	14272.5	25410	15765	24131.2	19211.2	20291.2	24948.7	17325	14032.5	12945	13008.7	19166.2	29133.7	22350	19113.7
21	acceptor	66867.7	50391.2	72753.9	64218.8	70041.5	76981.5	63150.1	60427.6	60803	61513.9	88299.2	55459.5	56006.3	74393.5	80576.2	65531.7	61423.1	81997.1	53760.5	77490.2	63180.4	72760.5	48842.8	76064.9	69275.8	70766.8	74236.2	78366.6	58159.6	69966.8	64621.3	89536.3	50420.5	77057.2	69917.6	74384	52370.8	46760.2	62412.1	67688.6	70037.3	72619	56667.6	79448.2	75203.4	81563.2	67578	57987.1
21	fret	0.894	0.759	0.765	0.754	0.802	0.794	0.745	0.744	0.691	0.701	0.803	0.623	0.651	0.853	0.864	0.763	0.711	0.785	0.664	0.807	0.823	0.705	0.785	0.729	0.84	0.712	0.781	0.845	0.936	0.828	0.759	0.876	0.785	0.844	0.733	0.825	0.685	0.709	0.755	0.731	0.802	0.838	0.814	0.859	0.797	0.737	0.751	0.752
22	donor	11100	17394.7	1982.93	8238.98	16662.7	18173.8	13363.4	14253.3	9451.24	24248.5	12095.7	19673.1	21160.8	40006.2	11231	18237.6	12147.8	11034.6	16744.9	15707.3	21740	18826.9	12154.5	22285.7	16807	14293.5	18340	15373.2	15146.5	17762.4	22692	17827.9	13922.5	14026.6	17223.4	17665	16897.7	20106.3	22436.8	11049.7	17356.1	16422.6	12186.4	16781.9	14307	18449.1	15798	8685.6
22	acceptor	70581.2	58588.8	61997.4	61618.5	71896	61171.1	47448.4	61736.5	75357.8	61294.9	78781.7	50771.6	52265.1	40797.3	75251.5	79109.5	50761.2	70622.1	76387.6	78052.2	75188.4	73121	57619.3	55939.6	64444.7	64452.6	66137.1	70335.8	67225.3	67124.1	61306.3	59688.2	67336.2	55092.4	62647.5	63382	75635.3	70115.1	68099.6	69117.6	79392.2	73210.8	69744.5	61628.2	81013.5	58155.1	66607.4	70098.7
22	fret	0.864378	0.771559	0.96858	0.881556	0.811885	0.770551	0.780628	0.812893	0.888632	0.716183	0.866399	0.721213	0.712158	0.504525	0.87044	0.812893	0.806843	0.864378	0.819957	0.832066	0.775589	0.794741	0.826011	0.715176	0.792725	0.818948	0.782644	0.820966	0.81592	0.790709	0.73027	0.769544	0.829038	0.796758	0.78466	0.781636	0.816929	0.777605	0.752419	0.862358	0.820966	0.816929	0.851248	0.785668	0.850238	0.759469	0.807851	0.889642
23	donor	91653.5	92631.5	76183.4	89318	74098	81248.6	83941.3	74845.7	80482.4	71903	82030.7	74254.4	87743.8	96083	98179.5	82428.6	100354	114911	110194	102315	120969	33000.5	1772.13	3295.86	1219.06	775.611	10048.5	-4172.5	-1182.94	-1361.55	792.857	858.143	7280.7	2204.49	7301.64	824.884	4744.44	2724.31	4167.97	11110.3	1294.2	4847.91	3605.04	842.128	9947.53	7614.52	-1239.6	3415.34
23	acceptor	20466.5	13799.9	22234.6	26619.6	32064.5	35263.8	19619.5	37470.8	23408.8	39098.8	31079.3	34579.1	18979.1	22051.9	26817.5	25363.4	13812.1	11.468	-4587.72	-1632.7	4383.12	-524.182	-2034.6	876.229	-1306.13	-3982.07	1215.7	2551.73	-4297.07	822.162	1297.86	811.438	-1900.05	-2335.34	6551.65	2338.53	-4155.29	3683.69	-2944.21	-2585.45	4043.72	-6466.5	622.242	-3423.04	-4069.36	-715.694	1533.38	1506.09
23	fret	0.182758	0.129824	0.226181	0.229321	0.301694	0.302555	0.189455	0.333246	0.225398	0.352213	0.274623	0.317321	0.17759	0.186462	0.214518
24	donor	140998	90183.6	91172.5	96392.3	95364.7	94898.1	89647.1	96549.6	102903	101151	93900.4	107339	102497	88119	92120.7	104688	96943.7	100545	100566	106682	98954.7	103806	103626	96045	107986	99352.8	108194	87803	108015	95537.7	105390	106187	106274	109485	95882.3	104927	95747.3	126627	133896	128589	118422	127248	121511	120884	131916	120715	123780	130605
24	acceptor	31848.9	34070.6	25525.4	30780	32086.6	28826.9	33246	25506.4	20768	24930.1	28876.2	26606.9	34242.2	26978.6	28904.9	29089.6	30581	29251	28951.2	25620.9	33342.9	22816.4	19643.7	26421.3	28542.5	32142.1	28464	37330.2	26391.4	25781.4	31177.9	26585.1	22543.9	25484.7	22748	30659.9	25049.5	1674.24	-2182.43	8.563	-2840.32	-649.71	-1402.84	485.131	-4151.19	-5499.81	3218.61	-2335.14
24	fret	0.184219	0.27468	0.218572	0.242172	0.252016	0.233318	0.270736	0.20875	0.16756	0.197951	0.235285	0.198932	0.250047	0.234302	0.23922	0.21759	0.240204	0.225452	0.223486	0.194027	0.252016	0.180298	0.159727	0.215625	0.20875	0.244141	0.20875	0.298364	0.195989	0.212678	0.228401	0.199914	0.175398	0.189122	0.192065	0.226435
25	donor	17663	15762.6	17242.5	16168.4	16756	20202.2	18055.2	17001.5	18416.6	18475.7	15472.8	17302.7	17300.5	17020.8	12882.5	17617.6	15287.5	16313.9	21948	11674.2	14576	19330.4	17905.1	17320.9	18863.3	18709.8	12959.7	15211.4	13465.5	16007	19270.2	19832.8	16185.4	14922.7	26027.3	64101.4	64948.2	63292.2	55055.2	68617.2	63308.1	58677.5	62490.9	61788.4	61261	63575.2	71766.7	60867.8
25	acceptor	66141.3	64784.3	58468.7	58361.9	65739.4	61562.3	60745.7	59443	59187.2	61995.9	62321.3	61335	63058.6	55118.7	53372	63928.7	56542.7	54874	57752.7	61522.2	65425.1	62185.3	60034.9	56428.3	62629.7	59533.1	60476.4	61202.1	60590.9	54681.7	62466.2	63848.7	61296.3	65090.2	55627.8	-3185.38	2231.57	5798.36	170.789	-6271.79	-1774.09	1191.95	555.929	-651.464	346.085	1804.94	-1686.88	-2271.55
25	fret	0.789611	0.804546	0.771803	0.78306	0.797086	0.752973	0.770864	0.777435	0.762399	0.770864	0.800818	0.780249	0.784933	0.764282	0.805478	0.783996	0.786805	0.770864	0.724563	0.84072	0.817569	0.762399	0.769924	0.765223	0.768984	0.760516	0.823138	0.800818	0.818498	0.773682	0.764282	0.763341	0.791481	0.813853	0.681571
26	donor	25527.2	8130.61	14259.1	44388.7	26467.2	37601	41367.2	35757.6	39658.1	32638.4	37430.1	41196.3	41312.3	38382.3	44510.8	35342.5	20027.4	36593.9	31722.8	37649.9	28640.3	29385	38785.2	22340.9	45408.1	28042.1	44175.1	189446	198083	64013.3	110227	85389.7	104904	79609.2	93856.1	78162.5	86000.1	90657.5	127648	93587.5	101901	99563.4	95962	81892.1	88991.1	79169.7	68890.4	73505.1
26	acceptor	54268	53188.3	58388.5	52086.5	44966.4	44730.9	54327.4	58700.5	50658.1	58564.4	53422	44632	45297.8	56474.3	45391.6	44812.9	53444.8	49147	44976.3	53410	63621.5	56538.5	45109.2	51613.2	49826.8	57147.8	44018	-3802.32	-5975.27	-6011.18	1607.02	549.384	4475.88	-9734.84	-7241.64	-5358.43	1194.85	-7104.36	-267.705	-2213.14	-4777.33	3987.79	1425.31	14816.4	-3542.04	-2799.27	2135.72	-2414.22
26	fret	0.67996	0.868136	0.803836	0.539298	0.629352	0.543081	0.567563	0.620786	0.561032	0.642402	0.587544	0.51948	0.52315	0.595705	0.505006	0.558438	0.727753	0.572833	0.586193	0.586193	0.689273	0.658616	0.538041	0.697126	0.52315	0.670765
27	donor	14705.7	18224.7	17891.3	10001.4	9661.82	15727.5	14835.4	6408.28	13838.3	15536.1	13816.7	14424.8	12473.9	18159.9	14730.4	21790	17789.5	10837.9	19428.6	20894.8	16520.8	18959.4	2308.96	11442.9	14810.7	12489.4	15230.5	15298.4	20542.9	18542.7	9529.08	10695.9	22030.8	12464.7	16101	19119.9	19221.8	12230.1	18246.3	13640.8	18873	17456.1	17477.7	17196.8	18027.2	17193.7	11489.2	20768.3
27	acceptor	54462.2	43252.1	49019.3	49809.6	56088.5	68814.2	61327.2	47154.8	46548.2	53270.8	51654.9	54115.5	46325.3	49045.9	66859	54075.2	59095.3	67346.9	48434.5	55747	56478.9	47209.5	50928.7	54364.2	53359.3	47411.4	54341.6	43304.1	54450.4	47008.1	61077.1	63438	48544.5	55810.5	58139.2	54781.3	53306.8	49451.1	52339.5	52997	53106.6	57656.7	60567.8	55318.4	55861.1	42829	57020	67143.8
27	fret	0.787555	0.703711	0.732519	0.832396	0.853359	0.813738	0.80499	0.880008	0.771283	0.774532	0.788642	0.78973	0.787555	0.729307	0.819216	0.713289	0.769119	0.861112	0.713289	0.727168	0.773448	0.713289	0.956548	0.8258	0.783209	0.791894	0.781037	0.738952	0.726098	0.717554	0.86555	0.855573	0.687803	0.817024	0.783209	0.741099	0.734662	0.801714	0.741099	0.795161	0.737879	0.768037	0.775615	0.762634	0.75616	0.713289	0.832396	0.763714
28	donor	23109.3	29239.4	19665.5	30581.4	34281.6	20889.7	41811.4	25280.5	19954.2	22956.9	25252.8	17235.6	33059.7	20614.8	20501.6	30027	33570.2	43920.2	35217	29024.6	40564.1	33741.1	44349.8	32701.7	12285.8	10262.5	9003.67	25915.7	15829	26259.8	23261.8	26227.5	24481.3	19914.9	11151.7	23139.4	11719.9	5153.31	19175.8	21476.3	13207.4	13916.5	22190	24633.8	23619.8	23088.5	22797.5	13239.8
28	acceptor	56465.7	51159.6	68526.3	66033.6	45511	50067	55325	48534.8	52517.7	50182.6	33705.4	42114.1	43696.6	44178.5	54993.7	58713	61954.4	61741.2	64153.7	53605.3	58948.3	44542.4	55787.7	51109.2	59970.4	61153.3	50747.1	42062.3	24400.3	24998.5	37877.8	47836.8	53268.5	52363.2	55489.7	52480.7	56132	68300.4	49418.9	57720.6	70794.3	58161.3	62372.5	61949.9	67226.3	52512.4	61815.3	48606.2
28	fret	0.709474	0.636056	0.776495	0.683512	0.570702	0.705312	0.569687	0.65767	0.72511	0.686621	0.571717	0.709474	0.569687	0.68144	0.728243	0.661797	0.648397	0.583914	0.645309	0.648397	0.592061	0.568672	0.557521	0.609412	0.830483	0.85607	0.849662	0.61862	0.606346	0.488087	0.619645	0.646338	0.685584	0.724066	0.832611	0.693882	0.827293	0.930284	0.720936	0.729287	0.843262	0.80713	0.73765	0.715723	0.739743	0.69492	0.730332	0.785985
29	donor	68172.2	65274.2	67663	64014.4	77106	65046.9	68127	53486.1	57274.8	71113.8	73999.3	69822.9	66451.5	71506.2	68150.4	66803.4	66356.5	68044.5	74441.6	67832.7	76431.7	65487.6	81067.5	114489	114112	125095	124456	114496	110904	127532	128499	126932	112671	111094	122384	119992	118829	120225	120556	123559	122138	124025	119092	115333	125814	118874	112765	119917
29	acceptor	47333	57727.5	43731.3	44918.9	34958.9	38741.7	40591.3	59456.4	67964.8	42390.9	34890.3	40536.5	43718.3	38834.3	36571.4	37818.5	48335.2	47021	46007.4	44807.7	40671	46865.5	42161.8	1223.07	4937.68	-349.577	1465.79	-1364.68	1615.8	-732.866	-1606.7	3936.57	4467.43	601.472	-787.418	802.778	-2138.62	5747.34	2065.83	4533.41	-3712.67	2790.06	3420.05	1830.57	-3386.43	-2653.68	744.573	-592.042
29	fret	0.409684	0.469182	0.392933	0.412645	0.311824	0.373287	0.373287	0.52626	0.542375	0.373287	0.320565	0.367406	0.39687	0.351751	0.34882	0.36153	0.421536	0.408697	0.38212	0.397855	0.346867	0.417583
30	donor	14301.2	22511.3	16704.9	16864.9	32744.7	101122	89027.5	97535	90471.9	91572.1	96838	93162.1	96523.9	86679.2	86103.9	90284.2	88479.9	94380.2	92001.8	89743.7	97129.3	95349.1	102454	88414.9	96023.2	88743.5	80100	98508.7	88105.5	98481	95574.2	90948.6	98193.4	93735	98991.4	95086.7	92435.1	97436.3	100089	88936.1	88014.1	91539.6	89813.5	96823.6	93085.1	92869.6	91833.3	93991.4
30	acceptor	68363	68729.6	77396.6	72946.2	58444.9	-5735.24	-4476.94	-1469.47	1915.24	-5549.76	2970.61	-2399.22	-4948.57	360.886	-1058.84	-3116.16	-1829.37	-1013.02	-5314.57	-4180.52	-8142.29	-3049.52	-7268.53	-4379.66	-4374.99	-5210.86	-551.274	-5091.83	-1819.1	-63.696	-4862.39	-426.959	-1127.65	-3989.1	-4186.87	-6081.43	3504.47	-912.251	1209.3	-132.268	-2566.5	720.713	-1452.23	3926.97	2844.11	-981.511	-4025.3	-1563.17
30	fret	0.826767	0.753709	0.822047	0.812609
31	donor	55334.1	48241.2	52395.4	53567.4	49676.9	51007.2	52656.4	50021	53062.5	54318.9	46978.2	53969.5	57969.5	52561.5	58380.8	50620.9	53100.7	44892.5	54018.3	48926.8	48722.4	51571.4	69844.1	78395.1	81047.7	86559.8	79291.6	82052.3	83916.5	85291.5	81103	92263.1	76813	86609.9	82874.9	88383.1	74559.9	71961.4	72110.4	75584.3	82199.9	83328.5	90529.4	78739.2	89626.3	86983	88723.3	90666.5
31	acceptor	31402	30460.3	34301	31583.7	38173.1	35912.7	37873.8	29468.6	33039.9	24773.1	30250.1	38723.9	26902.1	31947.1	38109.8	35419.2	29715.6	33483.9	31399.1	30539.3	30974.2	29518.7	4546.22	-774.629	-504.96	-3826.76	3319.04	2133.32	1978.9	-5818.33	-1728.62	-2034.95	-640.557	3509.54	1657.26	-131.634	-989.368	-202.062	-3799.55	3999.71	-4227.67	-6547.54	-4704.49	2097.05	-1256.8	3369.15	-3306.73	766.465
31	fret	0.362308	0.387289	0.395284	0.3713	0.434264	0.413273	0.418271	0.370301	0.383292	0.313355	0.391286	0.417271	0.317351	0.378295	0.395284	0.411275	0.35931	0.427267	0.367304	0.384291	0.388288
32	donor	13179.7	-464.28	8602.56	12528.6	12241.9	298.58	16352.6	18869.6	11537.4	18417.7	7047.69	19817.1	13228.3	12076.7	14078.6	19306.9	6600.67	15356.5	-221.33	876.797	-8447.57	5565.71	16955.1	13019.4	13879.4	12183.6	11221.5	17377.9	-1844.23	2932.14	1736.83	20633.4	19088.2	3063.33	10580.2	23291.2	7382.96	18442	10604.5	15011.5	9793.01	23772.3	18291.4	3753.31	15570.3	14467.3	2562.86	8835.79
32	acceptor	37447.8	42808.3	51495.3	44769	57683.7	53476.4	40526.3	53532.1	54676.6	44364.4	57036.8	43824.1	52977.7	65399.6	54389.8	41436	47430.5	58038.7	63683.3	52249.1	41128.1	52255.9	38267.3	39249.6	51608.8	43642.4	43720.5	54642.9	60195	51438.3	37863	49380.8	39300.5	37719.4	63644.5	51524.6	37028.7	58402.1	40516.9	46565.3	42211.7	54289.7	46690.2	55307.6	42062.5	57617.1	40334.7	59416.5
32	fret	0.739586	1.01116	0.85714	0.781942	0.825399	0.994445	0.712333	0.739586	0.825399	0.706467	0.889481	0.688997	0.800429	0.844372	0.794244	0.682062	0.877768	0.790544	1.00414	0.983386	1.2581	0.903907	0.692476	0.750374	0.788081	0.781942	0.795479	0.758787	1.03228	0.946566	0.956038	0.705297	0.67286	0.925106	0.85714	0.688997	0.834227	0.759996	0.793009	0.756399	0.81162	0.695963	0.718219	0.935803	0.730055	0.79919	0.939831	0.870003
33	donor	26109.9	23046.1	37403.2	40927.6	25283.4	22326	87084	108309	101026	105204	99234.2	108467	109665	110556	111402	111443	110658	114674	109132	103142	110814	112266	98970	110861	104476	102830	109016	103800	102002	95401.2	102183	108117	108848	104698	107292	110746	118867	111903	109226	104621	109156	102296	105360	106094	107625	108202	111880	112457
33	acceptor	76296.3	89438.9	70719.4	66664.6	74253.8	75207.6	27494.4	889.216	-1958.58	-2506.05	-1832.58	-1085.08	-431.482	-2782.46	-1461.61	-4919.82	2184.16	-93.102	-2000.72	2236.05	-4981.48	-3145.91	-3769.29	-2789.74	-4231.57	-1141.2	-7717.48	-160.462	-4203.02	1187.06	116.39	-371.292	-4444.03	1401.4	-1061.28	-1615.28	903.43	-6286.45	-4621.62	-1101.74	-3307.87	-2243.9	-7975.05	-2553.73	-2093.84	-7265.27	-3070.04	-5255.31
33	fret	0.744883	0.794822	0.653606	0.619285	0.745847	0.770862
34	donor	11864	13880.6	20138.3	15880.6	12492.9	16839.2	17752.9	17287.2	15945.6	14881.8	17568.5	15791.9	19651.3	19988.1	18762.4	12553.2	18891.2	13026	16522.4	15144.2	11819.1	10011.8	12723.4	13875.9	12381.8	19419.6	16418.4	18050.8	10767.1	14658.4	17209.2	16234	16595.7	13816.8	17641.8	10283.7	17859.3	18951.5	24094.5	16073.3	19098.1	7648.92	13314.4	9783.67	10878.2	16254.1	17495.2	17236.4
34	acceptor	46114.3	59744.3	61324	56468.5	59640.9	51824.4	66535.9	58360.7	55137.9	52054	50593	59341.6	48069.1	43176.3	61744.3	56517.7	54240.9	61415.9	63742.7	43500.2	60557.2	47062.1	54606.5	50894	55703.8	54510.1	62226.1	55803.8	59497.7	52982.7	50303.8	63344.3	57818.8	57139.5	52972.5	49864.4	51493.1	60469	61326.2	51794.3	50212.3	54981.7	62249.8	51804.2	52825.8	52012.5	68264.1	55183.8
34	fret	0.795604	0.811477	0.752345	0.780608	0.826362	0.75518	0.78905	0.771208	0.775911	0.77779	0.741933	0.789987	0.709587	0.683722	0.7665	0.817996	0.741933	0.825433	0.793732	0.741933	0.836564	0.824504	0.811477	0.7853	0.817996	0.737192	0.790923	0.75518	0.846741	0.783424	0.744775	0.795604	0.776851	0.804948	0.750454	0.829147	0.742881	0.761787	0.718182	0.76273	0.72484	0.878039	0.823575	0.841193	0.829147	0.761787	0.795604	0.761787
35	donor	2696.32	4877.49	844.433	5513.26	583.604	-19.5618	6612	9406.13	2363.76	-2265.95	2611.55	775.965	8904.03	7146.7	6494.63	8838.83	1855.14	10162.5	5425.23	4091.75	-3905.91	13047.9	7107.58	4000.46	1261.76	4675.35	25509	55527.1	49325.9	52257	56127	50118.2	53407.9	56397.7	57613.8	58256.1	52345	65790.7	48924.9	52002.7	48015.3	52931.9	58435.4	60407.9	48833.6	61741.4	53036.2	51223.5
35	acceptor	44856.2	52653.7	51447.8	42759	59973.7	56136.9	52848.2	50069.2	50859.5	50063	44544.8	49971.1	53331.6	44054.6	53273.7	54814.5	47989.2	49367.4	45917.6	50787.7	44147.8	46747.2	48704.1	58280.1	53037.8	58371.2	15667.1	1747.46	-1718.1	-4711.56	826.649	2531.01	-3845.63	3714.11	2741.96	2953.27	6873.01	1483.72	2593.77	-4965.36	-991.76	4145.81	5162.79	-712.223	9198.95	-4631.23	2534.53	887.225
35	fret	0.943025	0.915026	0.983764	0.88615	0.989996	1	0.888543	0.842297	0.955299	1.0468	0.94425	0.98501	0.856432	0.859979	0.890939	0.861162	0.962693	0.829412	0.894537	0.925944	1.09709	0.781973	0.873029	0.93569	0.976307
36	donor	-1229.56	-792.259	-614.708	3044.81	6091.67	33.0237	415.525	1593.72	5589.71	2951.65	3698.03	-876.65	-476.613	3552.26	687.332	-143.431	526.221	1090.66	1956.49	673.084	2151.58	899.955	298.254	7195.34	1129.02	-3645.13	1444.66	958.042	1519.19	-263.99	70678.6	91757.8	98258.1	93402.9	92952.4	100084	109762	112025	108067	95474.3	102147	98604.5	99629.2	94881.4	99699.4	91326	106927	97495.3
36	acceptor	87905.7	98853.9	81422.1	89927.9	98312.4	89478.5	95135	97840	93936.1	104309	89791.6	88693.4	89796.9	103011	82024.7	92335.4	94786.2	89932.7	104705	96575.6	102062	101388	82721.1	88250.9	96408.2	93405.5	104856	82105.3	95486.3	94071	20071.1	-6276.33	-4017.92	-1316.61	-338.373	-4941.87	-7828.94	-3038.06	-1729.68	-9190.03	-2713.98	-3234.55	292.473	2722.13	-7793.19	1417.72	-4133.09	-7520
36	fret	1.01417	1.00843	1.00776	0.96697	0.941758	0.999351	0.995446	0.984292	0.943828	0.972334	0.960222	1.00972	1.00518	0.96697	0.991524	1.0013	0.994793	0.988244	0.981648	0.992833	0.97966	0.991524	0.996098	0.924338	0.988244	1.04062	0.98627	0.988244	0.984292	1.00259
37	donor	32332.3	27968.7	33376.1	34556	32533.7	26001.9	38405.9	26585.3	36711.2	51982.1	40364	55614.2	59564.2	72822.6	67467.4	48147.5	34364.5	6806.06	23214.4	18292.4	4932.84	8297.23	18363.2	4086.03	10719	9841.74	157743	167008	136742	129408	147723	132979	133149	126614	135280	129285	33652.6	-828.308	1278.93	-624.768	346.126	1983.15	1379.06	1792.67	3756.23	2318.39	-285.174	3640.86
37	acceptor	103326	91427.7	103918	93572.9	85570	88071.8	102121	105779	102493	106550	101213	85162.9	77691.3	88114.5	82199.1	86028.8	92569.4	102107	87853.4	113468	115048	118779	117232	121747	119101	134665	6880.41	4353.44	-3511.99	-1774.41	-2780.84	3719.27	-2968.34	-1380.25	161.371	-1057.85	1331.46	2185.75	-415.949	2365.47	212.143	-1037.73	792.697	845.576	-773.378	7588.57	693.421	3517.89
37	fret	0.762039	0.76565	0.756612	0.730196	0.724692	0.771955	0.726529	0.79878	0.736615	0.671736	0.714568	0.604998	0.565988	0.54723	0.549212	0.641465	0.72928	0.937466	0.790766	0.861013	0.959063	0.93496	0.864468	0.967313	0.917338	0.931614
38	donor	18428.8	18462.5	18186.6	18865.2	18411.2	23788.7	25444.3	19689.8	24334.1	17471.1	13049.8	13125.2	16590.4	20564.1	17491.9	15319.8	17350.8	17183.9	19266.3	17652.4	28407.3	18751.3	20557.7	19487.6	19033.6	16856.7	5702.25	13847.1	26856	23094	17750.2	22178	16216.6	16171.6	18922.9	26589.7	22471.6	16805.3	20883.3	25992.9	28870.9	97273.3	97313.4	96429.5	109442	87886.8	88093.7	85443.5
38	acceptor	68022.3	74938.1	77699	72577.9	77470.9	72908.8	69033	73326.8	79586.7	69594	74146.1	78659.3	77395.9	76668.2	89806.4	72906	78980.3	78106.4	76347.5	71232.7	67579.7	68205.7	64378.9	75410	67572	72984.4	85698.3	82082.9	75303.5	68588.2	79289.3	68575.6	79807.6	73180.4	74111.4	73992.9	75354.3	70253.3	77283.4	64419.3	66094.9	-6134.11	-2344.49	416.477	-77.789	-680.933	-2741.29	-2147.73
38	fret	0.787199	0.802406	0.810033	0.793698	0.807852	0.753737	0.730167	0.788283	0.765577	0.799142	0.850596	0.857214	0.823142	0.788283	0.837394	0.826426	0.81986	0.81986	0.798044	0.801318	0.703558	0.783948	0.758038	0.794784	0.780699	0.812214	0.937523	0.856111	0.737651	0.748367	0.816582	0.755887	0.830809	0.818767	0.796957	0.735511	0.769892	0.806762	0.787199	0.712052
39	donor	131931	127512	133541	130623	126080	126090	127936	126692	126570	127302	128072	143964	142607	152958	148738	144288	145271	153835	143162	150470	164823	173519	167560	165898	160577	144458	130376	142236	151337	143866	147704	148202	148089	142030	152153	151709	149390	147388	142363	129764	1943.19	-2563.31	-1515.96	604.101	1262.27	-1628.36	-2443.11	-800.607
39	acceptor	17972.1	16989.4	18448.7	25278	16774.2	15441.5	21002.1	21602.9	27028.5	21943.1	29299.1	-4911.71	-981.825	384.44	-1284.87	-1076.82	-401.42	4598.05	-1693.18	-1466.87	-3521.06	-2167.39	-2444.54	1709.48	1349.24	2387.07	-2598.18	-7633.97	3759.24	1455.43	-281.535	1108.92	-4041.05	-2374.34	-3123.38	-1845	3001.07	-4976.32	-347.049	-986.703	325.073	6286.44	2048.76	291.463	-602.149	1268.68	1748.28	4029.91
39	fret	0.119925	0.117162	0.121768	0.162505	0.117162	0.108885	0.141163	0.145794	0.175546
40	donor	46586	50718.1	54967.5	52207.4	44611.7	46837.2	50448.4	61136.8	49319.3	46198.2	56508.1	46495.9	42650.2	50369.6	46320.3	49809	45820.5	46838.4	41524.7	45061.4	41176.2	52456.7	49252.4	47680.3	50801	42603.8	65381	64758.8	77008.9	70449.9	72776.7	76026.1	72939.1	68558.1	74708.5	74490	70065	73104	71077.7	71908.4	79818.6	75385.9	78214.5	60213.7	62066.7	67416.1	69423.1	76973.3
40	acceptor	20349.4	16518.4	17608	22310.5	25031.9	23249.4	20938.3	12361.3	19869.9	23807.4	18481.9	17445.9	21432.9	17079.9	17925.2	23962.3	23947.9	19015.3	13892	16092.2	13223.3	9785.23	24677.3	6199.36	12208.2	16153.2	-437.147	-4945.19	-2574.26	-472.251	259.484	-391.22	-2267.06	-1406.83	33.673	-825.445	-743.296	-804.097	193.171	-4125.77	-2581.41	-2611.62	-3510.79	1140.31	-2468.46	-4505.63	-5757.65	3376.34
40	fret	0.304132	0.245423	0.242678	0.298925	0.35978	0.332323	0.293692	0.168804	0.287116	0.339883	0.246793	0.272504	0.334849	0.253618	0.27917	0.324709	0.343643	0.288434	0.250893	0.263118	0.242678	0.156996	0.333587	0.114688
41	donor	20896.1	19395.4	19985.2	21269.8	24218.8	23477.6	19843.1	13707.4	14405.3	19960.5	17082.5	16588.4	17224.6	17474.7	23801.9	18561.6	13003.3	20223	15300.8	24706.6	17749.5	14985.8	19009.4	20429.8	32568.6	22548.2	21683.6	28063.2	31821.3	21297.6	32049.8	28121.9	31006.1	19713.4	31543.4	26920.7	20124.1	23931.6	20723.2	18614.1	26080.8	16344.5	20179.7	19957.4	17885.4	20695.4	25092.6	28177.5
41	acceptor	52507.2	46216.1	56198.2	50835.8	54207.2	48156.4	62898.8	62490.4	44889.1	40187.6	47604.4	47902	67291	66981.2	63787	53785.4	55741.5	57960.9	55828.6	70394.3	54887.2	67793.1	56338.3	53777.2	47450.5	66093.9	63172.3	61542.3	52522.3	52468.4	57509.9	55103.3	61263.9	49904.1	52886.7	50213.7	58311	55239.5	66951.1	49114.4	55359.2	63046.6	66707.7	53685.3	41567.5	63669.7	59992.5	43840.4
41	fret	0.715747	0.704307	0.737555	0.705261	0.69093	0.672702	0.760192	0.819927	0.757369	0.667891	0.735662	0.743226	0.79577	0.792973	0.728084	0.743226	0.810653	0.741337	0.784569	0.740391	0.755487	0.819001	0.747946	0.724289	0.593071	0.746059	0.744171	0.687099	0.622384	0.710979	0.641812	0.662111	0.664038	0.716698	0.626277	0.650524	0.743226	0.697624	0.763952	0.725238	0.679427	0.793905	0.767709	0.729032	0.699535	0.754545	0.705261	0.608728
42	donor	10577.1	11092.2	12857.5	39606.4	60888	54068.9	45144.7	35981	32155.2	27805.9	32591	32880.6	51674.2	57346.2	42418.7	51225.9	24640	30222.8	43006.2	52452.5	50403.1	44060.1	33433.3	42864.2	41522.1	28886.3	39461.6	29851.1	45412	32121.8	40909.5	23576.3	23481.6	35429.7	24031.6	24304.4	24724.9	21797	26388.6	41073.8	25692.5	31950.5	54524.1	51917.9	4149.15	-3409.25	1160.04	331.667
42	acceptor	72422.4	69025.4	74471.9	35411.1	20700.8	25587.9	51411.5	43936.4	39698.5	45320.2	57506.9	49763.8	37627.2	24138.6	39869.5	38812.2	61392.7	61936.9	43511.9	32977.8	37774.5	45921.1	49205.1	51733.7	52564.6	57572.5	46314.8	57038.3	33283.6	58049.7	48649.9	65168.7	47590.9	54790.5	53778.4	59498.1	56209.6	59413.6	49947.4	48374	54064.8	47799.6	34602.5	31338.3	16514.2	-8090.85	-1029.69	-2155.26
42	fret	0.872022	0.862015	0.853142	0.471656	0.253316	0.321393	0.531979	0.549269	0.552327	0.619244	0.637998	0.602656	0.421174	0.296654	0.484641	0.431015	0.714	0.67158	0.502699	0.385973	0.42806	0.510754	0.595423	0.547231	0.558452	0.666303	0.540109	0.65684	0.42314	0.644271	0.54316	0.734323	0.669472	0.606796	0.691668	0.709735	0.69485	0.731107	0.65475	0.541126	0.677912	0.599554	0.387919
43	donor	27657.2	23473.3	19644.7	23183.9	24275.8	25714	21222.5	25420	22463.1	57693.6	104914	92993.4	100981	95366.8	91869.7	92370.2	95860.6	100402	103577	101694	98539.4	96547.3	95685.8	94029.7	96744.8	93436.1	97538.2	100352	90647.2	103699	93808.4	92474.7	92688.1	99516.7	90656.3	36480.2	-3054.54	-109.015	-14.8029	1103.25	1533.44	-1345.11	2013.58	1453.99	-664.067	-752.603	969.309	-795.736
43	acceptor	65331.6	73771.5	78115.8	65691.1	72516.8	63777.9	71933.9	71441.1	75857.6	44285.2	-481.158	-2084.2	788.023	2484.39	9082.57	4762.13	3172.95	3174.17	2512.75	-1360.46	-609.154	6033.73	-977.949	1257.07	6360.41	-1667.44	-2336.96	-1028.65	397.389	-3351.67	-2765.85	2231.17	1125.96	2560.34	-1940.19	2098	-1890.33	3682.21	-2215.24	192.291	5513.91	-1845.11	-2411.51	-3394.22	3253.59	4070.19	2095.32	3816.05
43	fret	0.702412	0.758845	0.798722	0.739199	0.749504	0.712828	0.77188	0.737322	0.77188
44	donor	51934.9	54551	63807.8	37050.9	44520.7	46802.9	56628.1	48432.5	50717.9	36531	41044.6	53014.4	61140.8	56455.6	67973.9	96574.2	107752	96780.9	96282.5	115164	98955	96617.1	100023	88016.9	96848.5	87128.2	98154.5	103986	79126.6	93890.6	122201	91365.1	99131.5	62284.7	63566.9	77208.5	78761.7	102074	106124	115469	118582	109512	107862	107755	108906	109487	93881.8	100717
44	acceptor	57039.9	50832.8	32846.6	60764.3	43249.2	52818.8	43512.6	50058.4	52258.5	50900.3	62947	41269.1	40169.6	34644	25520.8	-4949.94	-3183.7	-3055.38	996.046	-1647.06	-4845.69	-5677.74	-4422.65	-2709.39	-4170.8	-3187.86	-4274.09	-6503.21	-1556.28	-137.472	5145.6	38.029	2062.43	3857.91	-943.578	6073	-2939.45	-1552.54	-7031.9	-4018.14	-3313.11	2320.19	1105.96	-717.896	-780.122	-2933.5	3066.96	1198.01
44	fret	0.523722	0.482571	0.339959	0.621549	0.492574	0.529776	0.434861	0.508624	0.507619	0.582577	0.605099	0.437828	0.396464
45	donor	171350	128569	182587	118788	174863	96608.9	110631	139541	137826	141947	170295	145179	127067	168572	143684	159429	131202	111527	135990	126027	156857	144223	139443	156280	120010	159664	156917	142167	144815	116406	110206	133205	129844	111519	130724	194219	177306	145262	164126	144951	145331	152638	191457	143517	171471	128281	131164	151439
45	acceptor	82516.1	87892.9	56016.8	53972.1	59028.7	68286.8	60207.4	27081.2	52423.7	34305.6	60009.9	52627	52362.5	45598.8	45604	54662.2	46268.1	44331.1	54774.1	51066.5	45357.1	34256.6	73030	41523.3	58989.5	67535.9	54384.9	41837.8	42738.7	59627.8	51831.3	28821.9	75895.6	52916.4	53272.2	44086.4	45878	64498.3	51055.2	50378.1	62855.1	70291.3	66629.3	55004.8	47976.3	64121.2	63668.1	62311.3
45	fret	0.325221	0.405631	0.234834	0.312172	0.252142	0.413818	0.352299	0.162813	0.275647	0.194394	0.260635	0.266115	0.291935	0.213131	0.240787	0.255214	0.260635	0.284542	0.286995	0.288636	0.224586	0.19168	0.344034	0.209606	0.329642	0.296922	0.25753	0.227493	0.228205	0.338593	0.319963	0.17768	0.369206	0.32171	0.289459	0.184948	0.205409	0.307891	0.237058	0.25753	0.301957	0.315621	0.258305	0.277253	0.218825	0.333204	0.326985	0.291108
46	donor	16610.2	19783.1	22676.8	13177.3	11845.4	10019.4	16002.2	20642.4	10419	8880.81	18784.2	16051.6	18827.2	13974.3	10977.5	12730.5	16137.6	18232.1	15772.4	17321.2	20053.8	16762.7	12477	19250.4	13424.3	19246.1	17213.8	14103.2	16870.1	15740.1	20511.4	17125.7	17675.7	12124.7	15772.4	15862.6	8979.63	13018.3	14330.9	12178.4	17856.1	16659.6	13286.8	21665	21123.6	20730.5	17102.1	14964.6
46	acceptor	48094.7	49042.4	43947.4	49028.2	33601.4	52221.9	51762.5	43684.7	42986.9	46075.5	42019.9	46172.5	46131.3	47063.5	46771.1	48430.3	40160.2	45782.5	50802.1	46673.5	40902.9	49312.9	35007.5	46257.4	43894.2	44409.3	41973.5	42530	38007.6	43756.7	39308	36208.2	46562.5	52747.4	49354.6	45569.2	42197.8	51559.3	45864.4	44911.6	41305.8	42412.9	46619.3	37492.5	54543.9	40269	50325.4	32382.1
46	fret	0.743031	0.712797	0.659481	0.787795	0.739778	0.838776	0.763706	0.678581	0.805448	0.838776	0.69137	0.741946	0.710648	0.771356	0.809872	0.792196	0.713872	0.714947	0.762615	0.728959	0.671144	0.746287	0.737611	0.706354	0.76589	0.697783	0.709574	0.750633	0.692438	0.735446	0.657367	0.678581	0.724641	0.813195	0.758253	0.741946	0.824293	0.798822	0.761523	0.786709	0.697783	0.718175	0.777927	0.634211	0.720329	0.660538	0.746287	0.683904
47	donor	46425	47269.9	43978	19971.3	22799	23960.7	29393.1	25701.1	27963.6	24390.6	26720	25949.5	22758.8	28814.4	27548.6	27321	23011.7	31581.2	21064.6	29083.7	26986.3	22311.1	21457.3	23138.1	28655.3	30694.6	31908.4	26734.9	25988.2	21307	21124.1	30742.2	27132.1	26058.1	28030.5	26617.4	25760.6	22696.4	25482.4	29045	30337.6	37392.9	24142.2	23670.7	24624.2	28204.6	22787.1	22685.9
47	acceptor	73065.4	76674.3	74405	78173	75156	77785.7	84898.4	82595.4	77020.8	73467.1	78077.6	78755.3	72459.1	78142.5	73486.9	73036.4	83542	77458.4	77204.6	71375.8	74026.5	77758.1	64986.5	72628.6	78702.7	72733.4	74569.2	78484.9	72817.1	74047.4	72227.2	78924.6	64855	78738.4	68663.6	61275	78092.6	70677.2	71565.7	69846.2	75236.2	76433.9	76258.2	72727.7	68882.3	79669.6	75454.9	70065.5
47	fret	0.61136	0.618631	0.628002	0.796638	0.767263	0.764013	0.742418	0.76293	0.733816	0.75104	0.744571	0.75212	0.760765	0.730595	0.727378	0.727378	0.78356	0.710266	0.785738	0.710266	0.732742	0.777032	0.75212	0.758602	0.732742	0.702805	0.700677	0.745649	0.737039	0.777032	0.773773	0.719881	0.704936	0.75104	0.710266	0.697486	0.75212	0.75644	0.737039	0.706001	0.712401	0.671006	0.759684	0.754279	0.737039	0.738114	0.768348	0.755359
48	donor	3538.18	3489.54	5790.97	897.658	6178.71	2477.8	1403.53	3060.11	-348.948	33901.4	121169	91224.5	-2234.84	-1735.92	-4105.44	-1841.54	-2212.6	-2779.62	323.691	-3845.56	-3100.65	31.8433	-3824.71	108.28	798.985	-4867.03	-2286.26	-1848.49	-1548.3	-3809.43	308.404	-593.544	-1538.57	143.024	-1955.5	37.4026	-1198.09	-1624.74	1630.06	4180.25	-4338.92	1570.3	-3379.99	1448	-1024.37	-4969.87	618.318	615.538
48	acceptor	101311	104960	97447.1	92188.4	104027	109167	97984	118916	106279	69488.6	236.859	-108.397	604.796	-3180.72	-1931.43	-340.56	997.042	-4896.21	-7346.06	5808.4	-1287.01	-5113.82	-3127.3	-517.941	-1730.31	-3951.09	1020.72	-4414.4	-2216.61	-2859.93	-4367.14	845.388	-4374.89	-4642.92	-1141.35	-529.884	-989.266	303.428	-3064.61	-3605.71	-4507.27	1250.57	-1663.74	-107.08	-2631.54	1142.79	-411.96	-3482.39
48	fret	0.966624	0.967607	0.944022	0.990188	0.944022	0.977427	0.986262	0.974481	1.00294	0.67224
49	donor	30712.7	25998.5	26226.7	16115.4	26145.8	25278.5	31639.4	33567.1	31893.7	22850.6	37879.6	29328.9	34784.6	29900.8	29053	28239.8	20669.2	20180.8	25606.5	19830.6	26337.6	29800.4	27383.6	27782.7	24307.5	26182.4	22818	20358.2	20296.9	24936.8	21127.7	22466.5	24484.9	22087	18371.1	25984.1	29188.7	26646.7	31096.2	24728.8	18253.8	18554.4	23091.9	26128.9	21476.6	21670.9	26790.8	24213.6
49	acceptor	73998.3	81677.6	86568.2	81510.9	70265.4	83792.3	81120.5	77151.4	76391.7	74086	71408.3	81714.1	77914.5	67298	77617.1	76108.9	70247.2	84229.3	78025.4	77487.5	76208	70447.7	76278.9	81396.4	74287.8	78412.9	85291.7	80158.3	85508.1	75907.3	77245.6	85957.6	74974	81641.2	73725.7	75257.6	78571.3	75095.2	77474.1	82707.5	82189.9	83134.4	84307	78795.9	79259.5	83021.2	75126.2	73508.9
49	fret	0.706894	0.758327	0.767027	0.835302	0.729255	0.767993	0.719539	0.697144	0.70592	0.764128	0.653132	0.736049	0.69129	0.692266	0.727313	0.729255	0.772821	0.80653	0.752522	0.795952	0.742836	0.702997	0.736049	0.745743	0.75349	0.749618	0.789213	0.797877	0.808452	0.752522	0.785359	0.793065	0.75349	0.787287	0.800762	0.743805	0.729255	0.737989	0.713703	0.769925	0.818052	0.817093	0.785359	0.750586	0.786323	0.793065	0.737019	0.752522
50	donor	22907.3	20023.8	20824.3	26123.9	30885.9	20514.6	18595.2	25191.9	15007.6	21513.8	8291.16	24619.3	17257.2	18995.5	14455.5	8843.32	16176.2	15796.4	10637.1	13552.8	15819.8	13719.3	10967.2	13587.8	16678.7	14908.3	17552.3	20707.5	13143.7	22182.8	19156.2	19851.5	8221.05	14341.6	11040.3	8451.85	16649.5	19389.9	15606.6	18633.2	15524.8	15083.6	20041.4	20140.7	21063.9	17058.5	13546.9	10558.2
50	acceptor	39933.8	30697.4	43261.1	47520.6	44221	46486.1	51444.4	49775.7	55281.9	48598.7	48686.3	55630.4	48803.3	48395.2	52663.4	44492.2	54145.4	52455.2	56688.2	64193.9	50322.1	46639.8	48131.8	42768.1	47842.7	65489.4	71926.2	37704	63242.5	40149	60100.4	59516	51068.4	42572.7	47386.5	46986.8	55268.2	43215	61643.2	40785.1	44551.8	41584.9	55453.1	58017.7	55640.4	44111.8	44187.8	45373.4
50	fret	0.635478	0.60499	0.674612	0.645283	0.589204	0.694092	0.734814	0.663873	0.786803	0.693119	0.854537	0.693119	0.738679	0.718361	0.784885	0.834576	0.769519	0.768557	0.842187	0.826008	0.76086	0.772403	0.814554	0.758934	0.741576	0.814554	0.804041	0.645283	0.827915	0.644303	0.757971	0.750261	0.861177	0.748332	0.810733	0.84789	0.768557	0.6902	0.7983	0.686307	0.741576	0.733847	0.734814	0.742542	0.725141	0.721268	0.765672	0.811688
51	donor	13773.6	20416.1	11020.3	30158.6	16876.1	23516.2	23039.1	17332.3	18200.4	6796.05	26993.4	16538.6	20734.9	23648.9	16792.3	18465.7	6465.56	16596.8	12435.4	15191	12735.6	18181.8	26136.9	13000.9	22811	26746.7	15889.3	19203.5	9947.37	27782.4	12037.4	21838.1	14825.6	17355.5	15679.8	9291.04	14965.3	14807	18377.3	23120.5	11816.3	12519.2	12072.3	21493.7	19196.5	9796.09	18426.1	28804.1
51	acceptor	48019.3	47604.8	44263	52341.7	39268.6	28222.2	28222.9	35597.7	45572.7	36239.3	32125.9	50709.4	46966.1	49225.1	51464.4	22903.7	26946.8	43049.1	50154.9	51531.7	46813.9	27144.8	21975	37642.6	49610.2	47662.3	49714.3	30259.4	34597.4	33135.6	47907.4	54354.2	43306.9	37854.4	45838.1	37231.1	36177.2	23169.6	44024.7	41222.6	27124.1	41140.2	42876.4	42328.9	48712.7	50320	31926.3	38255.7
51	fret	0.777429	0.699646	0.800413	0.633963	0.699646	0.545676	0.550719	0.672881	0.714099	0.8424	0.543664	0.754521	0.693462	0.675964	0.753482	0.553746	0.806689	0.721337	0.801454	0.772216	0.785778	0.599325	0.456544	0.743096	0.685224	0.640094	0.757641	0.61153	0.776386	0.543664	0.799367	0.713066	0.745172	0.685224	0.745172	0.800413	0.706869	0.610512	0.705837	0.641117	0.696553	0.767007	0.780559	0.663648	0.7172	0.837138	0.633963	0.570932
52	donor	20619.9	15158.6	13188.9	21863.9	30505.9	28274.3	22604.5	22622.6	24976.5	25455.4	31274.2	24779.6	31643.5	31160.3	16923	25968.3	25952.3	29713.1	27264.5	25181.9	25341.5	25599	25312.8	25969.4	21783	21603.1	20195.3	24654.1	73819.1	96831.5	98949.2	98982.2	90393.4	92704.7	101229	91729.9	86881.7	96976.2	93744.4	89310.1	93451.8	85269.5	95601.3	96295.2	92414.2	84918.3	96052.6	98148.9
52	acceptor	84782.6	90535.8	94576.1	77197.3	57892.4	77871.6	79191.3	80164.7	76797.4	59215.1	52913.3	55025.8	62041.1	57877.5	67779.4	69775.3	81173.6	75276.2	80351.4	79229.3	78401.4	81992.4	74310.2	77259.6	79679.2	82055.2	71649.4	87060.6	44841.5	8274.07	2385.56	3482.09	52.805	1662.24	-1687.75	1417.86	-701.708	1876.97	3.206	10401	538.32	2831.92	3570.83	5340.77	363.628	3250.41	5486.44	3838.99
52	fret	0.804824	0.856564	0.877983	0.779369	0.655328	0.733233	0.778389	0.780349	0.754848	0.699761	0.628599	0.689898	0.662249	0.650382	0.799932	0.728315	0.757793	0.716506	0.746992	0.758774	0.75583	0.761718	0.74601	0.747974	0.785247	0.791123	0.780349	0.779369	0.377577
53	donor	30328.4	25355.8	21843.8	26479.8	30753.4	33091	23123.8	26044.9	28374	33723.7	23348.6	25361.9	22716	27414.6	33358.8	33387.1	33632.8	30523.7	26424.5	26301.7	29189.6	39438.2	34896.8	23414.9	25925.8	29233.9	32008.8	30877.5	23088.2	20713.7	22412.5	25489.7	28432.9	19964.3	25309.1	25284.5	25943	19777.6	33035.8	29117.2	27947.7	34864.8	24897.6	31060.5	32553	39658.1	33046.8	23676.6
53	acceptor	91464.1	84586	78068.2	73319.4	64535.4	77577.7	63860.7	66137	57474.5	86998.4	101868	94644.5	104834	100206	85119.3	93767.1	98532.5	83503.3	94711.7	91055.7	93335.7	90020	90182.2	104773	98535.3	102467	80392	87151.4	90681.7	109351	109284	108058	95896.8	103518	110010	97146.5	103738	107649	104436	102009	94073.8	83021.2	67253.9	81317.5	94947	78851.8	89305.8	99488.9
53	fret	0.750919	0.769418	0.781082	0.734337	0.677541	0.701088	0.734337	0.717725	0.669681	0.720659	0.813086	0.788851	0.8218	0.784967	0.718703	0.737265	0.74507	0.732384	0.782054	0.776224	0.761633	0.695204	0.720659	0.816958	0.791762	0.778168	0.71479	0.738241	0.796613	0.841121	0.82953	0.809213	0.771363	0.838225	0.813086	0.793703	0.799522	0.844981	0.759686	0.778168	0.771363	0.704027	0.729454	0.723591	0.74507	0.665748	0.729454	0.808244
54	donor	7611.61	10791.8	8734.69	4676.62	6033.33	12464.9	41852.5	55376.1	48807.3	63203.1	47828.3	51341.1	56489.2	50569.5	48978.6	56537.4	54898.9	55533.2	52550.1	50169.8	54216.9	60581.9	57300.1	-3233.67	247.676	-1560.57	-1621.86	363.966	-863.881	11.9555	-1355.23	-2312.78	-730.305	444.112	-107.477	-1650.14	-1874.34	-720.876	2952.19	-1083.36	-832.975	-1323.28	-1244.7	757.883	-1730.81	-913.644	-1855.48	802.932
54	acceptor	60163.7	29983.9	38167.6	48226.5	47225.5	40889.3	10626.4	-1924.85	-1275.21	-2835.74	-2915.18	1059.28	560.059	-4958.49	-4726.08	455.263	-6822.25	1753.45	-3839.15	-6501.23	-2867.34	8568.82	383.126	110.668	2269.55	3002.01	2321.65	-387.627	-5516.75	-3052.04	627.564	304.944	-1905.16	2439.87	-1901.5	-962.798	-2180.99	-2832.42	-4740.96	916.106	169.954	2254.13	-3081.28	-2503.39	-3341.69	-491.525	-2889.55	-1526.42
54	fret	0.888055	0.735715	0.813969	0.91196	0.886543
55	donor	21033.5	20953.6	28863.7	25370.1	21288.5	26332.9	22717.6	23733.7	20702.4	17806.3	22148.6	23663.3	28551.7	24795.5	16818.7	26711.6	22002.1	21499.7	24139	27143.6	64566.7	76166.4	75197.9	74282.6	75593.7	68467.6	74552.8	70905.1	84504.7	72870.7	68675	65156.6	68716.8	62397.5	71085.9	64363.1	70379.9	75222.6	60237.8	74680.3	72486.4	64720.9	70682.5	64566.7	67400.1	70374.2	70743.4	68123.1
55	acceptor	46705.7	48519.6	51792.1	46615.8	43791.8	38727.4	40553	52626.1	44841.9	38608.9	44437.7	44538.7	47355.7	50956.9	46124.4	42515.9	52961.7	40656.9	47926.2	37665.3	1500.31	-4638.47	-4672.03	-611.983	1016.1	3657.18	3215.07	-1343.66	-702.855	5071.31	-4905.85	1317.36	-3235.87	-1258.72	-4124.8	-2248.41	613.891	-7575.38	-1043.41	178.846	-3063.3	-1201.67	151.936	-3657.65	-4884.8	2901.57	-621.255	-4828
55	fret	0.689246	0.698195	0.642479	0.647457	0.673333	0.595645	0.640487	0.689246	0.684274	0.684274	0.667364	0.653431	0.623554	0.672338	0.732969	0.614586	0.706146	0.654426	0.665373
56	donor	27530.2	35551.7	25109.4	26602	22881.5	15653.5	17286.8	25874.8	29237.7	36427.6	30013.2	28201.1	30643.9	23468.2	25043.1	27128.4	35437.2	23064.4	19221.3	33074.7	27355.4	26704.5	22994	23892	16816.7	22895.6	36176.5	22907.7	35330.7	31807.1	43583.3	33337.9	26222.4	16244.1	25557.4	16465.1	28934.4	23066.4	22264.8	23110.6	38946.7	31304.9	28078.6	30937.2	21812.8	30875	24211.4	31997.9
56	acceptor	42841.7	43890.5	64567	70808.3	44437	39968.1	52694.9	54925.8	46530.7	45348.2	41880	49743.2	50574.9	62277	46397.2	60847.2	60561.9	39743.8	62326.7	44068.2	52898.8	47610.2	39663.7	52274.8	56066.5	53240	49572.4	47498.7	48284.1	39758.4	43411.8	58169.1	46572.8	55295.2	59931	40779.3	51046.9	58203.2	40716.9	55007.1	46573.7	62228.7	53518.9	44616.3	42125.3	41534.8	58697.8	45740.5
56	fret	0.608965	0.552849	0.720407	0.727222	0.660069	0.718141	0.753552	0.679986	0.61434	0.554938	0.582299	0.638148	0.622971	0.726084	0.649088	0.691135	0.630537	0.632709	0.763947	0.571731	0.658968	0.640328	0.632709	0.686668	0.769744	0.698975	0.578065	0.674434	0.577008	0.555983	0.499276	0.63597	0.639237	0.773209	0.70122	0.712485	0.638148	0.715877	0.646898	0.704593	0.544514	0.665582	0.655669	0.590793	0.658968	0.57384	0.707972	0.588666
57	donor	28304.3	25731.5	43645.8	29758.1	25263.4	41236.7	21069.3	25944.6	42701.9	36091.1	27352.8	20209.2	6013.28	39463.1	14728.7	38427.9	45362.2	28734.4	25427.1	10458.5	806.846	22435.6	34100.6	28730.5	17172.1	30016.9	51820.8	29731.5	33484.1	25845.7	37187.2	30717.2	36825.6	46180.5	29263.4	30827.6	29685.8	41826.6	37640.1	49327.9	46351.7	24570.7	26808.6	45267.1	19585	24799.1	19493.7	37480.3
57	acceptor	90541.4	64242.3	88022.7	94568	74890.5	82407.3	63820.8	76973.4	69086.9	68607.5	75883.6	83824.9	71269.7	73618.1	81819.4	65965.1	65023.1	65303	51644	77180.1	45979.3	55791	66556.7	85773.4	43853.2	60370.1	86211	64575.2	49660.8	33425.2	50157.7	32910.1	50089.7	51415.5	74120.5	70790.3	55876	77744.5	56276.7	52429.4	64633.5	68422.2	72772.7	85945	65731	80451.2	65067	74320.9
57	fret	0.762384	0.714222	0.668974	0.760178	0.748072	0.666837	0.751369	0.748072	0.61811	0.655098	0.734923	0.805739	0.922192	0.650846	0.847463	0.631797	0.588847	0.694744	0.670043	0.880575	0.983329	0.713136	0.661501	0.749171	0.718568	0.667905	0.624419	0.685054	0.597177	0.564	0.574326	0.516972	0.576396	0.52712	0.717481	0.696902	0.652971	0.649783	0.599264	0.514944	0.582615	0.736016	0.730552	0.655098	0.770119	0.764592	0.769013	0.664701
58	donor	11480.7	10858.3	13300.4	7845.73	9413.61	203.951	9472.03	2323.13	2513.27	263.437	11601.8	16335.2	13949.4	17911.6	14980.8	8838.93	15670.2	13371.5	15606.5	10744.6	9893.74	5464.18	5193.31	13846.3	12680	43900.4	35493.8	52234.8	50844.3	67014.8	60880.4	52530.1	55399.2	65172.9	54158.5	56052.5	50286.6	44840.5	43080.4	47733	56229.9	57376	51816.3	54711.9	54216.9	58600.8	47366.5	47280.5
58	acceptor	68941.7	65646	72304.4	55682.9	70793	85420.8	85083.8	76092.1	84806.2	71300.6	68076.9	73487.3	66127	69170.8	69477.4	74152.4	73086.2	69256.2	70550.2	75315.6	68533.6	84792	74744	69265.9	68664.4	22370.1	13036.5	19813.1	13287.2	13597.8	11249.3	13460	14245.7	22210.5	9474.21	14463	8160.15	14400.7	16797	10768.7	4972.92	11561.8	12331.7	19211.5	18874	18475.4	8679.7	13825.5
58	fret	0.857845	0.857845	0.845129	0.877095	0.882264	0.997236	0.900479	0.969828	0.971189	0.995856	0.85402	0.818727	0.826229	0.793955	0.822474	0.893952	0.823725	0.837544	0.818727	0.874516	0.873228	0.938819	0.934814	0.833764	0.843862	0.337192	0.268755	0.274917	0.206788	0.168575	0.156333	0.204264	0.204264	0.25388	0.149047	0.205105	0.139385	0.243471	0.280235	0.184232	0.0812673	0.167756	0.192544	0.259986	0.258239	0.240019	0.154714	0.226291
59	donor	1587.91	-547.87	-4278.92	-693.437	722.858	4270.16	-2814.9	103.602	-4422.1	-5270.44	-1396.21	-403.496	-2139.56	-2088.25	-4991.24	733.596	-6489.87	-2052.46	-2058.42	-1276.9	1140.47	562.973	-6631.85	972.23	-772.187	2402.84	-1902.12	176.385	-767.414	2596.14	-2597.74	-5250.16	7446.38	-504.916	-2054.85	-2922.28	-2752.85	-135.033	3815.56	-5889.7	1636.83	-1718.37	-3321.99	3434.94	-3573.75	-572.926	-370.088	17506
59	acceptor	46116.2	46949.1	42699.6	33217.6	50198.8	57363.5	41760.6	52551.2	50685.8	42210.7	57655	57532.1	50826.7	43075.9	42105.7	40479.7	55793.7	51183.5	49471.1	57140.3	46989.9	37585.3	47913.8	50579.8	46734.2	47807.2	40584	45709.7	48440.9	42828.7	45854.1	38571	46406.7	46837.2	53618.5	41711.4	40898.9	43479.7	50384	48627.9	59310.7	41023.8	46493.1	43310.9	50042.9	48284.4	47892.5	24527.9
59	fret	0.966373	1.01129	1.11156	1.02138	0.986244	0.930761	1.07253	0.997493	1.09588	1.14323	1.02521	1.00754	1.04428	1.05067	1.13395	0.982506	1.13131	1.04173	1.04301	1.02268	0.976288	0.984998	1.16055	0.981261	1.01633	0.951574	1.0494	0.996241	1.01633	0.942982	1.05965	1.15788	0.862252	1.01129	1.04046	1.07511	1.07253	1.00251	0.929542	1.13793	0.972565	1.04428	1.0764	0.927106	1.0764	1.01257	1.00754
60	donor	36054.6	46032.5	37397.9	38280.9	37824.7	35618.4	41634.5	31077.7	31752.6	37149.8	30592.1	34415.2	41475.7	28407.1	39449.5	30717.5	35982.6	41607.8	37690	38886.5	32763.8	36549.5	33840.3	47597.2	38838.5	37952.8	42084	41052.9	34803.4	41000.8	27051.8	45092	48973.8	43160.5	39883	32569	30310.7	32694.4	41148.9	39150.7	32040.8	30041.2	34624.6	48672.3	32258.2	27804.2	43476.6	34112.4
60	acceptor	79554.3	84063	77583.5	81790.6	73714.7	76779.2	83462.5	81246.9	69938.6	80507.6	86829.8	74165.6	84930.4	71862.6	67720.7	75654.8	82871.4	76860.7	75739.1	82016.9	73492.9	85830.7	78005.3	75200.4	77013.8	77591.7	83186.4	74675.3	80963.6	82845.8	79896.4	83528.1	82436.3	71924.9	81143.3	59140.9	80802.1	86663.4	72087.9	76472.1	75997.1	80330.8	74489.2	65432.9	92122.9	94220.3	66853	76145.4
60	fret	0.688245	0.645704	0.674709	0.680955	0.661225	0.683037	0.66744	0.723803	0.688245	0.684078	0.739572	0.683037	0.671592	0.716461	0.632292	0.711224	0.697632	0.648804	0.66744	0.678875	0.691372	0.70181	0.697632	0.612755	0.664335	0.671592	0.664335	0.645704	0.699721	0.668478	0.746948	0.649838	0.627143	0.625085	0.670554	0.644671	0.726953	0.725903	0.636414	0.661225	0.703901	0.728003	0.683037	0.573915	0.740625	0.772322	0.605577	0.690329
61	donor	101709	101608	99196.1	90945.7	106600	107695	105315	113707	108641	101987	107447	97493.9	96374.6	95825.8	103129	97883.4	106118	98357.3	107073	91984.5	87484.4	93516.1	92332.3	108111	94040.2	87557.4	85588	94309.4	97537.5	100060	84103.7	86715.8	95145.3	103026	93675.3	99072.9	95957.6	98059.7	99278.6	92048	83883.9	86514.9	97818	98102.4	104756	108017	94687.5	98821.7
61	acceptor	22610.9	23416.8	15162.5	17931.7	17175.4	18849.2	28316.5	19780.7	13632.9	14786.6	14036.8	20507	20514.9	24757.4	17897.9	17573.2	23470.5	25358.1	20455.8	23315.6	22639.3	24958.3	22620.1	20450.9	18529.7	21678.7	22775	16988	26058.6	28497.9	19574.7	20681	19141.7	17629.4	20851.9	21146.3	20937	17725.8	21353.2	20703.2	14004.7	17123.4	24224.5	15208.8	18764.5	14872.5	22887	16046.7
61	fret	0.181594	0.187627	0.132355	0.164465	0.139064	0.149184	0.211959	0.148339	0.111535	0.126501	0.11568	0.173866	0.17558	0.204974	0.147494	0.152569	0.180734	0.204974	0.160207	0.202362	0.205846	0.211085	0.197148	0.159357	0.164465	0.198884	0.21021	0.152569	0.211085	0.221606	0.188491	0.192814	0.167878	0.145806	0.182455	0.17558	0.179014	0.153416	0.177297	0.183316	0.143276	0.165317	0.198884	0.134031	0.151722	0.120666	0.194546	0.139905
62	donor	197288	214020	197735	206394	165148	172531	195415	202180	183453	222535	219687	223883	201048	226657	234103	201573	171718	188894	190750	198280	195561	201069	201068	209145	212506	201381	208252	215576	216175	211369	234021	221908	198593	223337	209285	213244	195980	205088	211106	206794	210436	194892	187809	209416	196238	209421	215372	203604
62	acceptor	10123.4	9923.39	13067.5	11356.9	13668.8	18606.7	9347.55	7002.62	8021.41	3123.89	1499.32	6323.32	5447.5	4413.82	7466.04	3051.84	6218.35	6315.91	5152.36	3672.73	6891.74	867.952	1235.94	-2061.31	3976.7	4207.17	1873.74	-2569.74	3165.69	5577.18	4063.75	1366.21	2982.56	3167.81	4028.45	4878.28	7401.94	3147.05	3513.91	3434.57	5587.7	7344.71	1956.2	6633.51	1315.28	-1549.36	1819.44	4609.06
62	fret	0.0487378	0.0445304	0.0621297	0.0520412	0.0765172
63	donor	31863.7	31193.5	34327.1	33812.7	30967.8	20192.5	18994.6	23981.9	29158.2	35103.9	14901.6	27235	15781.1	9097.77	12142.6	11082.5	15872.9	15923	17027.2	13745.8	16619	27113.5	33148	22104.8	31054.6	28393.3	30982.7	58776.7	67387.7	70842.7	73423.2	73860.2	66420.4	75432.2	68734	72819.5	72072.9	72945.5	71198.4	68959.2	68404.1	75149.9	75311.1	67333.1	69856.5	69952.3	72920.7	67545.9
63	acceptor	24391.3	20496.3	21031.4	13793.5	35380.5	50912	44377	39846.9	35353.5	27620.5	55436	61403	61979.6	58014.5	70845.8	64388.1	48773.4	39487.8	40393.7	37415.4	39919.3	39582.6	28927.4	28027.1	32070.7	34621.7	38089.8	3852.02	-2429.43	-3285.78	-1070.56	-5301.74	520.664	-2649.36	-3086.84	-6649.22	-2819.34	-64.229	-445.042	137.992	-2524.68	-2804.87	1815.18	-4529.4	-801.411	-1866.24	950.127	-1005.9
63	fret	0.433802	0.396272	0.379942	0.29025	0.53279	0.715845	0.700512	0.624463	0.547756	0.440157	0.787819	0.692335	0.797232	0.864037	0.853397	0.853397	0.754888	0.71225	0.703228	0.731034	0.70594	0.593812	0.466388	0.558648	0.507552	0.549741
64	donor	52313.5	46679.9	57811.2	51382.6	47591.2	45759.8	47966.4	41516.3	36797.6	40701.5	46774.6	45797.3	47953.9	37440.8	50560.7	59054.8	56492.6	41416.2	51900.7	51202.1	47607.2	51241.4	48336.2	51572	49392.2	55956.6	54051.9	50114	47435.7	48388	42804.5	49374.3	45718.7	45472.1	44802.1	48645.3	58202.5	41546.7	50562.5	45361.3	68869.2	43989.1	64012.9	41923.7	58815.3	48990.2	44925.4	57019.7
64	acceptor	8717.89	22571.8	27370.1	3591.13	13509.5	27990.7	6230.45	25775.3	39400.4	20816.5	14613.9	17133.4	24443.1	20893.6	6570.5	23554.2	12098.8	20268.6	12749.9	8532.74	18057.1	20509.9	3789.88	6212.77	17206	5653.19	12920	4844.94	33694.3	21252.2	16980.5	4986.19	20794.8	11960.6	8627.06	6844.52	10660.2	20328.7	24403.1	9530.05	2610.61	15665.1	8184.87	3769.6	8983.69	7941.18	15670.9	12170.1
64	fret	0.142502	0.325968	0.32103	0.0657333	0.220688	0.379409	0.115243	0.383376	0.516934	0.338813	0.238342	0.272734	0.337824	0.358601	0.115243	0.285531	0.176653	0.328931	0.197185	0.142502	0.274701	0.285531	0.0725181	0.107465	0.257984	0.091922	0.193272	0.088039	0.415152	0.305241	0.283561	0.091922	0.313133	0.207952	0.161031	0.123026	0.155177	0.328931	0.325968	0.173723	0.0366939	0.262899	0.113298	0.0822166	0.132761	0.139579	0.258967	0.175676
65	donor	40768.6	43224.7	34064.4	37028.4	34769.2	41726.4	47809.9	38351.2	36509.8	38534.1	40380.9	37854.7	39999.1	41171.7	38012.9	38489.4	36808.8	34998.1	40212.7	39234.9	33854.2	33217.5	42192.9	34794.6	43032.5	38787.1	36133.4	37628.4	37394.8	42906.4	37003.1	40860.1	46589.8	44350	37787.9	41532.8	39004.6	35913.8	36673.4	39378.4	41825.8	45698.2	41686.3	42375.8	40097.2	43803.4	42967.8	40690.5
65	acceptor	13139.1	19531.4	15447.7	19793.5	12201.9	16094	14450	16979.4	20437.7	15839.6	13029.1	17473.8	25618.2	14753.6	18988.4	16621.5	12080.1	19517.1	17420.9	21252.7	19428.7	19034	24987.7	14458.6	8668.42	10501.3	15906.4	18224.4	14233.7	16753.1	9982.86	12368.7	16229.3	13378.7	15483.7	15396.9	16304.5	26791.7	19455.3	15459.6	20970.8	17408.5	13413.1	13559.6	20542.9	16307.1	14183.5	16841
65	fret	0.243796	0.310763	0.311789	0.348628	0.259301	0.277867	0.232406	0.306659	0.358832	0.291248	0.243796	0.315891	0.390371	0.26343	0.3333	0.301525	0.246899	0.35781	0.302552	0.35169	0.364944	0.363928	0.372072	0.293304	0.167896	0.212693	0.305632	0.326136	0.275806	0.280957	0.212693	0.232406	0.258268	0.231369	0.290219	0.270652	0.294332	0.426839	0.346586	0.281986	0.334322	0.275806	0.243796	0.242761	0.338412	0.271683	0.247934	0.292276
66	donor	20741.6	17528.7	27714.9	21096.1	20666	28258.3	18064.3	26842	21591.3	24757	24913.2	17166.5	28849.7	23217.1	17910.7	21104.6	27102.9	15094.4	18580.2	21675.5	21623.1	26898.6	21241.1	25742.4	21360.4	19842.9	20636	22507.2	26148.4	20236	25426.5	29902	26693.5	18591.4	20054	23868.6	24479.7	28172.4	25256.6	58487.4	93838.3	90523.3	90446	60369.7	72477	85440	84405.7	85515.6
66	acceptor	59506.3	63905.5	66553.2	69197.4	66614.3	57320.7	55812.1	73409.3	66898	73244.7	66868.9	64282.6	58262.2	65361.4	64779.8	66847.5	63529.3	65885.8	76443	61546.1	62560.4	70884.8	74628.8	68515.8	72518.8	64210	60352.2	66357.1	59300.5	70753.6	63427.6	69412.1	68919.8	67121.5	67985.6	67434.4	54523.9	73155.8	69766.3	26081	150.445	5174.49	6365.46	-1803.85	-1498	-6046.98	-1679.5	-1019.42
66	fret	0.741166	0.784647	0.705556	0.76622	0.763446	0.669532	0.75511	0.731835	0.756037	0.747681	0.728105	0.789237	0.668578	0.737437	0.783728	0.759744	0.70084	0.813901	0.804789	0.739302	0.743029	0.725297	0.77821	0.72717	0.772682	0.764371	0.744891	0.746751	0.694225	0.777289	0.714027	0.698952	0.720611	0.782809	0.77176	0.73837	0.690439	0.721549	0.734637
67	donor	28623.8	32021.7	30643.9	28989.8	31349.2	29462.4	29285.6	34355.3	35981	37808.3	30693.6	26852.4	38408	31997.7	35071.3	38535	25795.3	15389.2	25464.8	20237.8	31828.9	33827.7	39924.4	32552	32117.6	32926.9	31417.6	36732.5	28812.1	32679.9	30013.1	28520.7	33013.9	34501.9	37938	34709.8	34692.9	29563.6	34794.2	35667.4	35027.8	28463	32581.3	33619.8	32276.6	30788.7	28359	26367.4
67	acceptor	12527.9	14906.4	17620.8	14419.9	14778.9	10638.9	15112.4	9708.2	11387.7	14341	16005	24849.1	12943.7	16253.4	15543.5	15298.3	19974.1	31487.8	16212.9	29119.3	12172.4	17048.6	11303.6	12855.6	13636.2	23050.7	18347	8715.47	18958.6	14312.1	22386.4	20387.4	14265.9	15399.2	11380.5	15896.2	12813.1	11045	15680.5	16348.7	14580.9	21807.3	12670.9	9309.01	14717.8	19406.6	14699.4	11636.6
67	fret	0.304327	0.317868	0.364711	0.332473	0.320315	0.265352	0.340913	0.219851	0.240854	0.275527	0.343314	0.48028	0.252517	0.337303	0.3068	0.284363	0.436734	0.67139	0.389204	0.590174	0.276793	0.334891	0.221173	0.283104	0.298122	0.412075	0.36824	0.191752	0.397259	0.304327	0.426709	0.416597	0.301849	0.308035	0.230395	0.31419	0.269177	0.271721	0.3105	0.31419	0.294385	0.433402	0.280584	0.217201	0.312961	0.386893	0.340913	0.3068
68	donor	2940.78	2436.94	177.508	3839.38	2508.91	757.829	1323.53	1043.49	300.096	3242.19	4934.79	2918.29	1646.31	2895.79	1864.49	1749.77	5311.55	2335.72	1775.64	-545.643	2878.92	4875.18	3318.66	609.375	125691	120594	119589	129148	129697	129072	135052	126496	127070	128169	133077	127178	128661	134954	123253	122485	3129.72	-935.898	-536.647	1449.49	300.096	-652.486	1951.09	3775.27
68	acceptor	111619	135075	121935	123029	112368	114209	112030	114146	118858	127534	123742	113500	134191	118614	120578	121129	130587	126820	119472	110515	127812	122056	113674	112194	2831.11	-5529	985.41	-1350.86	-3335.09	-6530.81	-1161.35	-1484.91	1352.96	-2104.11	-476.064	-2787.06	-1801.44	-6025.38	-16.99	1816.37	2056.36	2003.38	3064.87	1370.34	-49.787	-1857.94	-3138.91	473.037
68	fret	0.974623	0.982355	0.998473	0.969965	0.978493	0.993118	0.988514	0.990818	0.997709	0.975397	0.961393	0.974623	0.987746	0.976172	0.984667	0.985437	0.960611	0.981583	0.985437	1.00536	0.97772	0.961393	0.971519	0.99465
69	donor	28706.3	27429.1	21855	24536.6	30246.1	44649	32581.6	25209	20888.2	24286	22607	26482.2	24445.1	33277.8	23283.3	47207.3	21703.8	15568.6	20084.5	24011.4	28320.4	8844.65	14383	26545.9	21839.1	11017	20589.8	26187.8	21719.7	26024.7	21286	17116.4	17836.5	31089.5	28348.2	30333.6	24238.2	20028.8	17482.4	22718.4	16662.8	27015.4	21616.3	12942.7	23621.5	14466.5	29649.3	15767.6
69	acceptor	38297.7	53508.5	50078.5	56973.3	50156.6	39298.5	48318.9	44021.3	52555.2	25015.9	41344.8	49647.4	46007	47413.3	43636.6	36654.2	50982	54254.9	53166.9	48178.4	58396.5	45212.2	47970.2	50303.7	60471.6	56029.7	53181.3	35832.6	61834.2	41808.9	40884.5	52594.8	40471.3	50534.4	44261.5	42588.6	40773	41744.3	41988.1	60253.4	52507.4	46973.8	50728.9	49180	41104.3	60274.9	46116.8	49953.1
69	fret	0.571465	0.661487	0.696194	0.699364	0.62399	0.468504	0.597124	0.635412	0.71525	0.507547	0.646868	0.652086	0.65313	0.587867	0.652086	0.436763	0.701479	0.777283	0.725877	0.667773	0.673028	0.83592	0.769745	0.654175	0.734398	0.83592	0.72056	0.577608	0.739734	0.616738	0.657311	0.754711	0.694083	0.618809	0.609501	0.58376	0.627102	0.676179	0.705711	0.725877	0.759001	0.634372	0.701479	0.791321	0.635412	0.806494	0.608468	0.760074
70	donor	201331	213065	245933	225138	203985	174588	185949	221604	232652	219107	181956	224982	229229	255274	262969	249225	194609	206147	211510	196071	214831	191293	207215	193951	203711	200112	207984	199963	202492	200315	195124	207719	196371	113875	163276	193556	183977	193540	188428	162117	192442	194907	36576.6	-3156.92	-183.596	-2260.66	-1098.11	676.142
70	acceptor	158.744	1218.34	-2009.67	-2183.5	186.651	1882.08	1539.95	-1940.37	-1545.6	422.99	-2299.73	2847.55	-676.418	8109.02	16294.1	12270.4	15188	11534.8	14377.1	13917.4	11598.5	13514.4	11705	18011.1	7678.88	11903.7	17009.5	10908.6	11142.9	12480.1	10124.6	19010.4	12088	8046.08	10806.9	9712.55	11921.3	12072.1	10931.4	8261.51	9335.69	12749.1	6520.77	1913.89	-1016.56	6481.57	296.657	587.858
70	fret	0.000783255	0.00548993	-0.00859343	-0.0101515	0.000783255	0.0109966	0.00784788	-0.00859343	-0.00703404	0.00156685	-0.012486	0.012573	-0.00312963	0.0308009	0.058085	0.046801	0.0726957	0.0532405	0.0637531	0.0661877	0.050823	0.0661877	0.0532405	0.0849605	0.036385	0.0564675	0.0759584	0.0516285	0.0524343	0.0588937	0.0492131	0.0841403	0.058085	0.0661877	0.0621319	0.0476047	0.0605121	0.0588937	0.0548539	0.0484087
71	donor	59947	62322.5	67491.2	68082	77684.4	71109.9	70526.2	76548.5	62864.1	77023.3	72256.4	54905.8	68752	65135.9	68544.5	73619.1	61579.6	65763.6	66879.3	75860.1	75222.7	67938.7	63794.3	74257.4	65550	78781.6	85092.4	86345.2	81035.9	81034.1	78130.2	85015.9	85486.3	77629	80057.3	77485.7	87709.7	100786	97409.7	83217.1	76011.4	79515.8	72487.6	90494.9	77971.9	85127.6	89427.6	94627.1
71	acceptor	19535.2	17645.3	20776.3	14087.3	11449.1	14507.1	8836.82	15776.4	25755.7	6259.17	6033.4	16980.6	17852.2	17940.9	9175.27	7917.99	9773.5	15484.2	35616.7	14872.9	16966.5	26842.9	22752.7	22205.8	28931.3	8054.31	-3877.35	140.169	-7602.78	-5459.85	-4853.16	858.025	-4260.94	-3145.68	-3143.57	-2143.55	-3788.4	1268.32	-6756.82	-6296.92	-4103.13	1023.48	-1008.17	-2962.84	-6358.93	-2343.29	-2695.18	-3557.2
71	fret	0.245501	0.220623	0.235599	0.170911	0.128889	0.169615	0.111489	0.170911	0.290466	0.0747246	0.0774773	0.235599	0.206765	0.215599	0.118204	0.0966139	0.136855	0.190223	0.347987	0.16442	0.183812	0.283266	0.262674	0.230633
72	donor	154610	155459	145636	161230	161599	170548	163987	150035	145682	142344	154176	155012	164327	170562	147399	170346	166039	159113	157596	162660	155372	159838	160929	163575	154256	162834	163269	153174	153192	147010	164620	173281	155974	159098	157563	148199	165903	168338	157877	188548	170164	131990	124920	132371	124026	129237	126252	135122
72	acceptor	42699.3	50953	44356.4	47342.6	44768.7	44967.6	36642.5	49720.5	48501.1	55405.9	60091.5	42156.5	27622	56593	38148.7	47885.3	50210.9	41159.7	51907.2	43934.6	43656	49560.8	50526.6	42916.2	59029.3	49633	56373.7	55018.3	50456.9	35068.8	47532.5	49864	46064.3	38839.6	37560.6	56162.4	46626	55425.1	42623.2	36790.3	45772.7	44844.6	34879.4	40687	51055	53619	58722.9	46855
72	fret	0.216569	0.246784	0.233396	0.22718	0.216569	0.208649	0.182477	0.248576	0.249472	0.2802	0.2802	0.213925	0.143873	0.249472	0.206016	0.219217	0.232507	0.205139	0.24768	0.213045	0.219217	0.236952	0.238735	0.207771	0.27656	0.233396	0.256659	0.263873	0.24768	0.192904	0.223637	0.223637	0.228067	0.196392	0.192904	0.274743	0.219217	0.24768	0.212165	0.163507	0.212165	0.253961	0.218334	0.235176	0.29116	0.292986	0.317898	0.25756
73	donor	17261.9	9484.7	17905.4	18333.7	10180.6	9414.22	9634.72	4514.36	10934.2	7859.85	12882.6	9517.24	650.14	7299.56	11514.4	14292.4	17712	15745.5	-2756.81	-4002.1	16998.1	10977.6	13677.9	7089.9	9403.37	-193.915	-4739.52	1288.15	10782.4	7312.21	-654.802	-1963.36	8761.75	-5527.55	3419.07	-2102.53	13104.9	-2910.43	283.238	-7504.84	-9062.82	-4314.78	-6152.91	-3362.29	1830.37	-4602.16	-7488.58	507.355
73	acceptor	41444.9	77824.1	52997.6	37961.9	54038.6	53783	57483	35329.6	63214.8	57536	58960	63264.5	44648.5	61400.1	44487	40104.4	68637.8	61994.3	57010.8	44423.1	45757.9	51988.4	43015.9	42280.5	52531.1	64370.9	61986.4	46179	44289.4	55353.3	39980.2	54145.9	53993.7	49085.6	66541.9	66812.2	47430.5	75839.3	59569.8	53071.9	55257.2	50681.2	47635.3	54647.6	54292.5	51343	54874.7	53250.5
73	fret	0.706173	0.891457	0.747068	0.674588	0.841731	0.851037	0.85621	0.886266	0.852071	0.880041	0.82108	0.869673	0.985324	0.893534	0.794294	0.736829	0.795323	0.797381	1.05047	1.09906	0.728646	0.825207	0.758342	0.85621	0.847934	1.00314	1.08319	0.972761	0.804588	0.883153	1.0168	1.03783	0.860351	1.12662	0.95081	1.03257	0.784009	1.03994	0.994756	1.1649	1.19584	1.09271	1.14787	1.06524	0.96753	1.098	1.15852	0.990563
74	donor	6603.07	1958.48	10176.1	1887.45	2580.74	2815.44	314.035	2234.87	5429.57	-927.405	-654.103	-549.106	1016.59	3533.44	1072.18	3394.47	-904.244	2866.4	2528.24	732.48	5974.63	5062.08	2857.13	3098.01	8605.74	5326.12	6522.78	3774.32	9641.82	4804.22	1353.2	4467.61	4316.29	4484.59	2690.37	7651.5	37371.9	109144	108867	106357	108080	93141	-28.7513	-1421.51	-3124.63	-504.327	1654.3	249.184
74	acceptor	84556.4	104331	86425.2	102117	98166.6	103943	101278	108120	100246	101898	102807	88109.6	94612.1	89141.2	104179	100204	91159.6	101049	102386	105040	101158	97526.8	101867	92760.1	85367.1	106105	99731.5	96282.1	79533.5	97958.9	101941	104397	96281.2	109457	101967	92676.5	63444.8	26.092	995.295	3987.74	1429.73	642.441	-252.719	596.979	9012.31	1173.34	5686.12	-385.85
74	fret	0.927881	0.981242	0.894244	0.98223	0.974329	0.973342	0.997039	0.979267	0.948641	1.00888	1.00592	1.00592	0.989141	0.961487	0.990129	0.967415	1.00987	0.972354	0.976305	0.99309	0.944688	0.950618	0.972354	0.967415	0.908098	0.952594	0.938757	0.962475	0.892264	0.953583	0.987167	0.958523	0.957535	0.960499	0.974329	0.923925	0.629058
75	donor	9284.42	9525.4	19291.8	21229.9	2323.69	19794.4	15925	14809.6	9225.9	23498.5	11911	24059.6	11742.4	8468.55	11639.1	4464.92	1989.76	14561.8	19994	12847.4	19267.7	11277.6	23484.7	13095.3	10640.8	7239.58	15260.6	10689	14186.5	21174.8	19057.7	25636.3	10881.7	14258.8	6330.76	19756.5	9181.15	13611.6	19140.3	18727.2	10764.7	17367.4	12809.5	24717.1	15239.9	13856.1	21316	20620.6
75	acceptor	39458.3	29274.2	44068.6	39203.6	40150.4	44957.3	39097.5	56337	41797.4	52889.3	44438.9	37560	47823.6	33296.6	36607	43541.4	59324.5	31972.2	45927.3	39752.3	40055.4	40423.8	38712.7	47874.9	36300.1	43310	47193.8	46257.6	35740	41651.4	49348.2	42970.8	42532.4	36503.6	45606.5	46713.6	45457.3	34846.6	55211.1	40431.6	33462.4	25575.2	34480.6	43566.9	49477.6	44574	41281.7	37261.2
75	fret	0.809836	0.75467	0.695927	0.649215	0.944945	0.693841	0.710548	0.791735	0.819445	0.692799	0.788547	0.609082	0.802366	0.797043	0.758892	0.906753	0.967996	0.68759	0.69697	0.755725	0.675105	0.782178	0.622424	0.785361	0.773698	0.856988	0.755725	0.81197	0.715781	0.662665	0.721018	0.626536	0.795988	0.718923	0.878565	0.703232	0.832286	0.718923	0.743077	0.683428	0.756781	0.595776	0.72941	0.637863	0.764175	0.763118	0.659558	0.644052
76	donor	20950.1	16264.5	22552.8	17020.7	18097	20302.6	20872.3	20379.2	18843.3	18769.2	23499.3	15553.9	21804	17590.3	17543.4	18214.3	19610.7	17317.2	19450	23139.7	18319.4	17201.1	16794.6	20728.9	16194	15494.6	16590.7	20249.5	12445	17432.2	19189.3	18797.6	21826.2	20175.4	24995.7	20679.5	18421.9	21784.2	23505.5	21047.7	17921.5	18667.8	19907.2	24974.7	24130.7	20455.9	18929.8	18743.2
76	acceptor	73633.9	63397.7	62832.8	58196.4	65592.7	72883.7	75433.4	63972.2	76982.3	65069.9	70692.6	72310.3	63153	63591.6	60550.2	66208.4	62514	66639.5	69377.5	63473.2	62571.2	71802.4	65837.2	60530.6	63722.4	62057.5	66058.7	67248.3	67213	60121.8	66738.4	65633.7	64539.4	62347.8	72211.5	59663.9	68479.6	65765.4	62542.3	64837.6	62215.4	64774	71067.5	57727.5	73055.2	69097.2	55553.6	67364.2
76	fret	0.778575	0.796306	0.736149	0.773647	0.783502	0.782517	0.783502	0.758854	0.803198	0.776604	0.750959	0.822875	0.743062	0.783502	0.775618	0.784487	0.760827	0.793352	0.780546	0.733185	0.773647	0.807134	0.796306	0.745036	0.797291	0.800244	0.79926	0.768717	0.843509	0.775618	0.776604	0.777589	0.747011	0.755894	0.743062	0.743062	0.788428	0.750959	0.727257	0.754907	0.776604	0.776604	0.781531	0.697588	0.751946	0.771675	0.746024	0.782517
77	donor	10521.5	16295.3	26508.6	33565.2	21595.6	129673	118104	117839	123269	150514	177752	181725	181600	178507	168562	208113	195627	131036	120878	141374	153443	128648	120812	125714	142702	181376	137608	138459	154645	160058	187262	182045	157295	76426.4	76592.3	84770.4	99155	100777	95815.9	99105.3	14445.6	-489.234	-3009.77	-2153.51	-1090.73	7298.51	2239.34	7765.84
77	acceptor	127301	133916	118817	110982	114319	27752.4	-3874.89	-4183.24	678.461	-4112.3	7274.25	-3755.15	-583.514	2164.16	-461.102	1093.25	164.173	2677.66	-4214.64	-7402.41	-3842.31	1873.14	-3098.29	-1759.09	-2644.5	-280.477	-5542.59	344.311	2173.57	2047.49	-2542.16	-2869.95	-5666.5	-203.277	1065.22	-1510.71	-2531.89	-3565.41	-2107.45	1791.62	1586.79	-920.102	6803.07	4247.75	3592.31	-246.502	-3319.73	-3204.25
77	fret	0.92382	0.891112	0.817722	0.768344	0.841595
78	donor	18999.1	13340.2	15006	23788.2	12510.1	14854.4	14185.4	12424.8	11973.7	12161.4	10671.8	15767.9	9889.07	17494.3	15794.4	15241	13353.4	17742.6	23691.5	22488.1	11945.3	18267.6	10705.9	8697.01	15631.4	15720.5	14509.5	20471.6	13455.8	13857.5	15601.1	13660.4	10245.4	13199.9	20505.8	16444.4	14316.2	13243.5	8547.3	15927	6943.99	13677.5	9553.63	14608	15100.8	30823	43355.7	51967.3
78	acceptor	45477.8	48201.2	33249	43925.6	39908	38966.3	34228.8	45603.9	29572.9	44512	41319.4	39795.1	55358.5	44332.5	36706.6	38123.2	32698.3	36704.6	38373.9	35851.3	39267.1	38050.2	40048	33173.6	36824.9	39965.9	41603.5	39809.9	43374.1	38855.8	46796.7	42993.5	40851.8	50945.4	42245.1	32651	44518.9	41519.4	44247.8	35568.4	40039.7	40925.7	38986.3	44419.4	35583.8	17626.2	-8408.06	1281.78
78	fret	0.705534	0.782783	0.688996	0.648956	0.761627	0.723958	0.707476	0.785663	0.711359	0.785663	0.794294	0.716204	0.848702	0.717174	0.698726	0.714265	0.710389	0.674375	0.618522	0.614585	0.766441	0.675351	0.7895	0.792377	0.701642	0.718143	0.74137	0.6607	0.763553	0.737505	0.750059	0.758737	0.799085	0.794294	0.673399	0.66461	0.75681	0.757773	0.838237	0.690944	0.852503	0.749094	0.802914	0.752953
79	donor	41222.8	48984.5	35514.6	36871.9	38268.4	40902.4	34190	54505.6	41950.8	38428.6	42621.3	31481.2	37121.2	32128.6	36521.8	48802.3	40372.9	69283	46504.1	61985.4	53800.6	37950.9	30536.4	37312.1	39801.2	50371.5	45324.3	48033	48886.7	38049.7	49980.2	44256.7	31503.3	51540.8	35410	42523.4	27222.4	31615.5	33656.6	21655.2	27730.8	32543	28192.1	26862.7	27468.9	33080.2	32969.9	27406.5
79	acceptor	97233.9	92614	91236.1	89742.3	82635.7	79886.4	99054.4	62113.2	89030.6	87954.8	86361	89169	89836.3	97498.4	91482.7	82792.9	84893.9	91619.2	61103.9	84493.5	91175.8	77133.8	83397.1	87376.6	81794.4	79700	92801.5	84021	81954.2	85355.4	86308	79151.1	87774.7	83097.1	79368.4	80756.1	86469.7	92443	92946.1	91658.2	93276.1	78020.1	103853	84146.5	86534.4	76717.4	80892.6	80188.4
79	fret	0.70267	0.654051	0.719511	0.708614	0.683829	0.661002	0.743268	0.532542	0.679861	0.695731	0.669937	0.73931	0.707624	0.75217	0.714559	0.629205	0.677877	0.569464	0.567468	0.576442	0.629205	0.669937	0.732383	0.700688	0.672915	0.612294	0.671923	0.636164	0.626221	0.691763	0.633182	0.641134	0.736341	0.617269	0.691763	0.655044	0.76008	0.745246	0.734362	0.808468	0.770952	0.705642	0.786756	0.758103	0.759092	0.698705	0.710596	0.745246
80	donor	33528	32096.7	31822.6	29593.2	44567.9	31587	41711.7	36135.8	29741.3	38604.5	85262.2	99545.6	84913.3	94044.3	99108	101968	96166.8	87183.9	57015.8	75418.1	92819	100256	102059	97617.4	87693.6	116121	109775	112407	96681.7	114045	112036	102639	107792	106755	121045	112112	110002	119416	105977	96891.5	90566.5	91957.9	78751.8	67248.6	91376.1	106286	102564	112580
80	acceptor	71427.8	70599.2	63751.9	69296.1	52023	57406.3	41189.3	57994	66338.5	54854.1	22803.1	-3601.94	-2386.63	2379.33	-4471.1	-2832.55	4723.67	582.323	-965.675	-1285.15	-345.201	1553.86	-128.695	-2541.66	3781.67	2323.15	2023.86	293.971	303.672	-654.669	-2146.53	1493.73	-2535.38	-2212.35	-3232.54	-5182.42	-3988.73	471.77	3785.24	-2457.36	-2233.42	-3939.72	-1926.43	-932.619	-8.615	-1045.99	-3071.91	-808.938
80	fret	0.680327	0.687211	0.666547	0.700967	0.538722	0.644857	0.496768	0.616196	0.690159	0.586465
81	donor	10719.4	14123.9	10288.8	15644.9	14408.5	15774.5	11828.6	15347.7	16349.9	16808.2	14321.6	11360.3	9889.69	15131.2	13598.9	15220.6	16485.9	14330.4	16151	16498.5	17954	16801.9	14752.2	39107.5	71182.1	73602	66223.9	66508.5	64487.7	72648.9	73920.6	61060.5	65598.2	65609.5	66026.2	62808.1	64611.1	66464.4	58135.7	66750.2	62347.3	61687.5	70143.4	66688.5	65750.5	63586.2	59168.1	65566.7
81	acceptor	51012.9	48914.1	47145.3	49534.9	46096.1	52881.5	53621.8	49319.1	55108.8	42464.4	52134.8	52427.9	44114.8	49195.7	45025.6	48183.7	47982.7	49169.8	45468	51684.6	50760.3	50603.6	42832.7	26007.9	-2009.2	-3250.39	-615.121	-843.32	-9342.85	-587.509	-6343.2	-1745.26	-3234.46	-3021.47	-482.322	-3219.69	-1436.34	-1930.46	-2496.17	2811.1	-1552.07	1147.58	3567.26	3062.68	-2650.71	-2295.66	-3762.41	1778.88
81	fret	0.826786	0.776407	0.820988	0.759878	0.761824	0.770577	0.81905	0.762797	0.771549	0.715983	0.784175	0.821954	0.817116	0.764743	0.76766	0.759878	0.744295	0.774464	0.737469	0.757932	0.738445	0.751116	0.744295
82	donor	14368.3	25180.4	23675.6	24771.6	29744.2	57332.7	14454.2	24625.8	21257	25026.8	26630.5	25443.3	44500.4	97355.2	89649.1	104897	82898.4	81489.9	73156.3	71800	88003.7	79969.5	85173.8	92853.9	79539.9	78803.2	87108.1	88139.1	78326.8	79089.6	80352.2	85327.4	89797.5	89042.5	84559.4	90323.3	93322.5	80133.5	71045	87631.4	86074.6	80495.4	99073.5	88196.3	77293.2	93221	82500	86051.1
82	acceptor	59254.3	54521.7	52815.5	47566.3	48543.3	54350.5	48650.4	54463.2	53908.5	58587.4	56928.4	62987.5	44051	-3032.06	3447.85	-2356.41	-4817.77	2309.78	-2445.2	455.658	-218.707	-5483.8	-3936.63	7056.3	-639.894	3867.07	-5017.37	1117.88	4034.18	-2485.34	-1088.79	-10462.5	4307.59	1636.89	-5858.8	-8425.75	-2938.73	-3908.65	2676.1	1726.6	-882.022	2520.43	-368.404	6561.43	2583.82	2371.9	-937.612	-6662.92
82	fret	0.805325	0.684173	0.690337	0.657519	0.619757	0.486622	0.770955	0.688282	0.717111	0.700623	0.681087	0.711955
83	donor	28221.5	39182.5	26429.4	43174	28656	30939.9	27678.4	26269.5	18337.6	13202.6	16817.1	18039	18138.5	17713.1	27497.4	29129.6	20893.1	26245.3	13187.5	23533	17776.5	26347.9	20917.2	19680.2	20395.3	29395.1	16162.4	29485.7	21040.9	10306.3	16690.3	11546.3	22670.1	25388.5	17655.8	28082.7	11989.8	19981.9	28001.3	17565.3	18521.7	20036.2	13751.7	14026.3	13872.4	23843.8	5940.58	17366.2
83	acceptor	87747.4	77543.9	78206.6	73169.7	88608.8	65111.3	66498.1	75752.5	74005.1	84192.1	92977.9	97422	92219.2	97858.3	69352	90291.9	90069.4	78368.4	104963	86367.2	91149.2	90140.3	78590.2	103601	82063.8	68455.4	92903.2	83017	84136.1	86463.5	65571.9	99785.8	80582.7	72215.9	97625.7	88177.5	95329.2	83627.6	91183.5	84959.2	99528.6	77353.9	83757.9	121194	102937	81961.8	102910	90358.8
83	fret	0.757157	0.66445	0.747586	0.629162	0.756093	0.67803	0.706351	0.742278	0.801012	0.864916	0.846411	0.844239	0.835562	0.846411	0.715833	0.756093	0.811787	0.748649	0.88788	0.785995	0.836646	0.774223	0.790283	0.839899	0.801012	0.700042	0.851846	0.738036	0.799937	0.893365	0.796714	0.89666	0.78064	0.740157	0.846411	0.758222	0.88788	0.807478	0.764615	0.829065	0.843154	0.794566	0.859465	0.89666	0.881307	0.774223	0.945257	0.838814
84	donor	8055.83	7828.82	4638.77	8107.21	1279.07	2712.8	6689.01	10641.3	3525.24	6264.86	8015.21	7907.68	5889.7	3583.79	7264.89	5231.38	8209.96	8146.63	11128.8	7671.11	4484.65	6954.25	6404.65	2138.11	7299.54	4064.09	3874.12	8235.05	3845.44	9784.67	7194.4	8348.55	6510.99	8721.32	6252.92	4883.7	7954.28	10373.7	8501.48	6957.83	8235.05	7508.62	5810.85	15971.2	8543.3	7128.69	7697.4	7085.67
84	acceptor	40151.9	30203	36517.7	28930.4	33072.1	32967.5	38348.4	49824	37247.2	37425.6	33773.1	42111.2	47257.4	33456	43133.6	31879.4	38819.5	52397.2	45290.5	39476.5	44869.7	37735.9	39757.6	43195.7	34681.3	47422.1	45617.2	36049.7	39511.1	34363.8	39321.7	46432.1	38134.1	38985.8	42384.8	37836.6	37050.3	39885.7	38149	38259.9	27577.4	46100.1	31105.9	39692.4	34124.2	34523.7	35332.7	32263.8
84	fret	0.83282	0.794247	0.887446	0.780656	0.963034	0.923802	0.851452	0.823901	0.913467	0.856751	0.807768	0.841724	0.889189	0.90309	0.855868	0.859396	0.825687	0.865558	0.802368	0.837268	0.909148	0.844384	0.861158	0.952858	0.825687	0.921222	0.922082	0.814054	0.910877	0.77793	0.845256	0.847913	0.854103	0.816743	0.871705	0.885702	0.823007	0.793343	0.817639	0.846142	0.769733	0.860277	0.842611	0.713493	0.799664	0.829256	0.821219	0.820324
85	donor	35788.6	38944.6	39902.8	33773.5	38513.9	39890.6	38047.8	39865.2	46340.7	42415.4	41935.5	40720.6	35125.4	45336.8	47012.8	45406.3	37169.8	46783.1	48461.8	55054.4	47230.9	52004.4	49122.9	49860.7	50776.8	45943.7	49765.1	45271	48280.2	44849.1	47317.1	48462.4	49265.4	50750.9	49826.4	54536.4	50243.4	46849.3	50944.1	52763.2	47137.6	51667	49270.3	50457.6	50046.8	48221.1	57942.6	45043.5
85	acceptor	20495.6	12245.5	20330.2	15792.7	17189.8	14047.3	14180.8	15199.7	12007.6	17684.2	21250.1	17041.8	11288.5	5745.16	4174.16	489.914	758.502	518.196	224.308	1802.39	-3284.31	3618.96	6734.15	5192.58	2279.1	6966.03	31.305	2160.28	5308.4	4944.15	649.927	-979.826	-995.588	4214.14	1741.58	2599.79	3407.97	5007.47	3908.54	865.61	3605.34	205.758	4743.8	3140.89	645.138	8305.83	-564.407	9964.75
85	fret	0.364029	0.23932	0.33759	0.318921	0.308315	0.260233	0.271187	0.27603	0.205499	0.294053	0.33643
86	donor	14500.2	18333.5	11772.5	14678.6	10585.4	9478.3	13471.5	14572.5	15395.1	11109.7	14231.1	11844.7	11907.8	13649.9	10388.6	16236.2	11354.2	15964	9722.78	8623.38	14138.9	9303.01	15279.8	12120	11294.2	10745.3	12358.3	14452.5	14255.7	12396.7	12158.4	12581.2	17710.8	12565.9	11996.9	15399.7	9964.19	12793.4	10241	11729.4	15687.3	14532.5	19337.6	9756.61	13122.5	15385.9	16167	16620.6
86	acceptor	41004.1	51585.1	56227.3	48160	43541.5	48423	54867.8	49430.1	42436	49139.5	44079	49397.6	51227.8	42293.2	39864.5	42208.1	46401.4	42539.3	38895.4	50158.2	34115.2	49843.8	48803.8	43850.9	46363.6	42611.9	45767.4	46755.6	52317.5	50922	45505	42223.2	51658.1	50754.5	40416.2	42296	37164.6	33407.9	52489.7	56486	42739.4	51754.6	52032.9	46214.7	51281.6	42816.1	46441	46667.5
86	fret	0.738656	0.737652	0.827004	0.766755	0.804907	0.836046	0.802898	0.772777	0.733639	0.815954	0.755715	0.806916	0.810933	0.755715	0.792857	0.722604	0.803903	0.72762	0.799886	0.853128	0.706556	0.843079	0.761736	0.78382	0.803903	0.798882	0.787836	0.763744	0.785828	0.803903	0.78884	0.77077	0.744676	0.801894	0.77077	0.732636	0.78884	0.722604	0.837051	0.828009	0.731633	0.780808	0.728623	0.826	0.795869	0.735646	0.741666	0.737652
87	donor	12059.5	20065.9	30714.8	18138.8	20453.9	16747.8	19060.5	19525.8	17664	23499.5	25319	26202.5	14003.3	19622.1	18186.6	24682.5	23910.5	24399.7	25277.6	30084.6	27873.9	18951.4	25610.6	19673.1	16845	23234.2	20798.8	18079.8	17358.1	21841.6	32909.6	28124.1	23136.2	22168.3	17792.2	23466	26261.5	21926.1	16637.1	19052.5	18255.9	24266.6	23376.8	24280.2	20332.8	18977.7	14455.8	15763.9
87	acceptor	43306	39723.2	44733.8	38526.8	38541.4	47394.8	43674.3	50397.6	52498.8	37761.8	51699.8	35374.9	52021	37885.5	38204.8	39474.7	45183.9	39038.4	34293.5	34951.8	38413.9	39265	48391.3	38577.1	44028.3	42738.9	38847.1	44560.8	54653.9	36267.5	35801	35069.9	30954.9	45672.9	45646.1	43549.3	46067.1	50486.5	45942	37387.8	40905.1	43097	47371.5	41326.8	41403.2	43684.2	43917.5	47300.2
87	fret	0.782281	0.664357	0.593032	0.679856	0.653673	0.738507	0.696271	0.720313	0.748056	0.616589	0.671144	0.574293	0.787962	0.658532	0.677921	0.61561	0.653673	0.61561	0.57528	0.537611	0.579229	0.67405	0.653673	0.662416	0.72319	0.647836	0.651728	0.711678	0.758539	0.624419	0.520667	0.554498	0.572317	0.673081	0.719353	0.649783	0.637117	0.697235	0.733725	0.662416	0.691449	0.640043	0.669206	0.630284	0.670175	0.697235	0.752824	0.749964
88	donor	20620.2	9653.54	27380.1	22289.2	18956.4	29265.7	21537.5	29337	58832.9	64051.3	47229.2	44586.9	37269	42665.7	54865.7	53135.6	58476.2	41042.6	54626.1	45983.3	58104.2	52628.5	55067	40716.5	56718.1	44788.2	68614.8	48378.4	50829.6	-1799.83	-347.454	-449.374	-2709.47	1591.59	-2411.35	-2039.34	4567.68	-4842.17	4529.46	-265.917	-2230.44	-6383.72	-2250.83	-1583.24	1397.94	-352.549	1380.11	-102.843
88	acceptor	32231.7	27511.8	31703.5	28513.8	24845.1	29985.1	23189.7	12215.3	-1134.3	-3063.33	7348.46	-1252.17	-5590.06	3281.05	-1014.73	-1460.42	-332.138	-5362.08	-67.709	1245.72	-1705.54	778.099	4478.58	-6320.88	-2459.51	2384.97	152.105	-637.723	-6091.24	4428.69	-5808.67	2740.35	346.695	-888.098	-1471.3	-1756.38	3053.02	1246.29	404.277	-816.875	3003.12	-2861.68	-140.77	-3018.59	125.617	3086.96	1678.33	-5635.15
88	fret	0.609518	0.74022	0.536792	0.560743	0.567039	0.505963
89	donor	23018.8	19577.4	18228.4	23586.5	16763.8	23372.7	17262.7	16599.2	18673.1	19113	21398.3	20538.2	16120	18439.7	17795.9	22855.4	19201.5	16240.4	22209.2	21597.3	21057.9	18551.5	19491.4	15063.4	24043.5	16247.8	22043.3	21269.3	24333.5	15377.9	20603.3	22655.2	13344.5	15094.1	15089.2	18739.5	17523.1	22311.1	16242.9	17756.6	21886	20726.2	22497.9	17588.3	20965.8	20376	18657.2	16211
89	acceptor	64557.5	69846.4	55301	65362.2	70659.6	66755.4	66999	69534.4	75539	69710.7	63670.9	69474.5	70541.9	73673.9	55550.1	70411.3	64873.1	64876.8	61349.7	68027.9	70528.5	69549.8	65685.8	58151.5	64186.7	66019.7	71987.4	68722.3	72701.3	70331.6	59686.7	74811	69122.5	57740.7	66264.5	61924	65640.4	68001.8	68806	74066.5	67512.5	70241.3	74345.9	68096	68683.1	61448.5	63806.8	71333.2
89	fret	0.736713	0.781332	0.751951	0.734805	0.808652	0.740527	0.795483	0.807712	0.802072	0.78511	0.748146	0.771875	0.814284	0.80019	0.757652	0.754802	0.771875	0.80019	0.733851	0.758602	0.769981	0.789828	0.770928	0.794541	0.727165	0.802072	0.765243	0.763346	0.749098	0.820846	0.743386	0.767139	0.838612	0.792656	0.814284	0.768086	0.788885	0.752901	0.808652	0.806773	0.754802	0.771875	0.768086	0.794541	0.766191	0.751	0.773768	0.815222
90	donor	5600.42	2066.71	11444.6	11269.1	10303.5	6540.47	2344.2	8849.55	13068.5	7374.35	5086.5	4595.23	7187.47	13198.7	7664.57	11034.1	3826.48	1700.03	5314.43	8597.55	4498.96	7746.69	6723.1	5365.4	5497.07	8362.54	7756.6	10892.5	8693.82	7334.7	5577.76	4691.51	8274.76	13898.1	9863.23	9461.16	18853.2	10745.2	12212	10521.6	13068.5	7467.78	3390.43	2851.03	7177.56	5686.78	4830.25	366.399
90	acceptor	75772	82302.2	72867.7	50620.9	83008.8	73168.2	86629.3	57581.4	75549.7	68018.1	79003.2	64789.9	74724.7	69392.5	66538.9	80771.5	70072.1	79353.3	87523.7	73521.4	69311.6	76333.1	93737	77909	93777.8	61774.2	79718.5	77804.3	81921.9	78678.4	74844.9	67040.6	72738.1	56492.5	80292.8	60697.3	81194.4	83572	79068.9	81414.6	73383.8	84270.9	86164.5	83315.9	82188.4	71042.4	71516.6	82471.2
90	fret	0.930797	0.9751	0.864428	0.817538	0.889378	0.91764	0.973375	0.867111	0.852774	0.901776	0.939536	0.933422	0.912362	0.840185	0.896469	0.879601	0.94825	0.979408	0.943025	0.895583	0.938664	0.907955	0.933422	0.93517	0.944767	0.880491	0.911481	0.876929	0.904426	0.915002	0.930797	0.934296	0.898239	0.802964	0.890265	0.865323	0.811171	0.885826	0.866217	0.885826	0.849179	0.918519	0.962138	0.96733	0.919398	0.925542	0.936917	0.995722
91	donor	13833.9	10915	13531	11544.4	10804.4	11931.6	5330.12	11796.2	12148.9	16598.2	33473.6	30707.4	24429.8	27300.9	18326.1	11753.3	15840.4	14823.7	8394.76	13255	12856.3	8624.16	21018.2	24994.1	27188.4	24842	28875.4	23057.9	25886.7	7588.98	9952.64	22711.6	16532.4	4317.94	3081.48	30992.4	49547	57585	48508	43575.5	44995.4	54156.1	45732.2	44252.9	47880.5	48532.9	45629.3	40294.9
91	acceptor	30186.7	33696.5	31704.9	36609.5	39517.6	29509.1	25785.3	32048	31337.3	13045.9	11494.3	16554.3	12963	16069.5	26672.6	31810.7	33362.9	33940.3	24242.6	37648.2	37800.8	35758.4	28866.7	20679.2	11056.8	17713.8	15230	16013.3	14663.4	13099.8	36329.9	18319.2	30502.1	44312.2	26129.6	10431.1	-2199.49	-6232.02	-3042.67	-4507.34	-2050.88	1102.6	-3222.59	-2472.54	-4928.93	-1141.4	-2168.32	-1352.96
91	fret	0.68543	0.755658	0.701262	0.760612	0.785017	0.711684	0.829024	0.731369	0.720289	0.43972	0.255689	0.350006	0.346417	0.370143	0.592864	0.730521	0.678315	0.696012	0.743167	0.73981	0.746514	0.805694	0.578266	0.452957	0.288772	0.416227	0.345219	0.409428	0.361892	0.632725	0.785017	0.446347	0.648447	0.911432
92	donor	72409.3	8079.32	45437.4	26179.6	39736.5	44154.1	30996.5	65062.2	43328.9	34319.4	30927.6	21356.5	25652.4	39041.1	30562.7	46489.6	16065.1	32099.4	36567.7	21770.1	33690.9	33995	57609.6	54402.4	100715	114807	126734	83288.1	93092.4	99348.8	82156.9	83918.6	82144.7	96013.8	95071.1	117605	102941	90501.5	105315	91839.5	76320.1	77471.6	81862.9	94489.3	79989.6	120488	23600.8	5190.34
92	acceptor	61739.1	74534.6	44914.7	52343.3	65135.4	63307.7	60877.1	48612.6	58307.2	28695.7	63374.8	77271.7	64221.1	45367.6	55977.2	54296.6	50842	62993.9	57230.8	61604.7	68944.3	63094.6	52039.6	28866	2305.84	3513.86	3183.19	-4239.1	3322.89	-1645.41	173.939	2579.76	1192.28	2029.06	1850.51	-1052.54	-733.987	-3404.62	-1724.45	3108.21	-388.188	502.457	-4059.75	2301.6	3317	1025.88	-1825.16	2766.59
92	fret	0.459933	0.902789	0.496671	0.667034	0.620765	0.589187	0.66297	0.427896	0.573225	0.455723	0.672482	0.782857	0.714453	0.537489	0.6469	0.538654	0.759986	0.66297	0.610531	0.73914	0.671117	0.649558	0.474852
93	donor	8147.63	34182.3	12277.5	6305.95	10775.3	9835.84	5894.36	13005.3	20702.2	7682.56	6389.66	6247.81	590.221	4254.98	6394.31	12684.4	3755.03	10621.8	3629.46	3066.73	12403	8126.7	6438.49	14014.5	7687.21	11619.4	16756.1	4961.89	4520.07	9112.65	1652.91	60.0387	16295.7	6005.98	10861.3	3980.59	5810.65	9080.1	4150.34	6205.96	9498.66	3617.84	12079.8	6829.15	10868.3	4543.33	-923.587	5003.75
93	acceptor	51439.5	18510.6	41178.1	41936.6	29940.4	38546.2	50429.3	40927.4	34148.2	35459.5	43477.7	38216.3	36729.4	34668.5	21717.4	19480.4	46548.4	37927.6	44255	37201.9	38994.9	37618.1	33173.5	37140	33285.6	34901.9	42473.7	37622.7	49296.7	50716.9	47362.5	45990.3	27392	56508.1	52676.7	41892	46192.5	42237.1	45700.6	34343.3	43132.4	30048.5	33331.7	36454.6	33767.8	39603.2	31571.9	44397.9
93	fret	0.863433	0.351718	0.770355	0.868981	0.734832	0.796392	0.895721	0.758476	0.622976	0.821537	0.872313	0.859001	0.983947	0.890135	0.772519	0.605349	0.924904	0.781186	0.923778	0.923778	0.758476	0.822634	0.836918	0.726271	0.812776	0.749861	0.716664	0.883442	0.915901	0.847944	0.966822	0.998851	0.627136	0.903556	0.82922	0.913654	0.887903	0.822634	0.917026	0.84684	0.819345	0.892369	0.733761	0.842427	0.756321	0.89684	1.02999	0.899077
94	donor	10326.7	9729.32	11313.8	13496.6	14137.5	16142.2	12990.4	13559.4	16176.6	13414.6	5695.71	16617	14000.8	12446.7	15314	8677.38	11317.9	12795	9068.19	12868.9	9559.23	13958.3	14474.7	3158.51	8287.59	12872	11499.1	8217.73	13368.1	11791.7	8512.35	10380.3	9910.55	13102.8	11972.9	11456.6	7026.07	16836.7	19382	13882.4	13047.1	16918.7	9059.07	12818.3	19554.1	24096	17286.2	12715
94	acceptor	45278.8	42303.8	35002.2	44953.2	40905.6	41430.2	37647.1	40747.1	48638.7	47710.9	41875	42997.3	49477.9	42821.4	37656.6	41205.5	39394	46698.3	36535	34917.1	41968.9	45943.9	43122.4	46360.5	51937.3	38844.2	35882.3	35591.1	34970.3	36563.2	42157.1	48653.6	42103.7	41619.9	45705.9	37274.7	44367.2	41745.6	40718.1	42707.9	46453.9	45946.7	46089.6	41806.7	37442.6	39258.6	37706.6	45843.2
94	fret	0.814202	0.813071	0.755981	0.76931	0.742716	0.719652	0.743819	0.750446	0.750446	0.780466	0.88059	0.720746	0.779348	0.774882	0.710916	0.825538	0.777114	0.784925	0.800659	0.730611	0.814202	0.767084	0.748235	0.936723	0.86212	0.751552	0.757089	0.81194	0.722935	0.755981	0.832361	0.824402	0.809681	0.760417	0.792789	0.76486	0.863271	0.713097	0.677322	0.754873	0.780466	0.730611	0.835779	0.76486	0.65692	0.619766	0.685952	0.782687
95	donor	17448.2	20656.2	23824	16918	16186	13559.7	21295.5	18936.9	15404.6	22301.4	22863.5	25359	17347.3	12062.8	15945.1	16894.3	14861	13639	18329.5	15728.9	18792.8	20514.1	16807.9	16420.8	15803.1	17805.5	16854.2	16509.3	16216.9	15839.1	16206.6	18939	21783.5	13704.9	14185.7	13678.1	16957.1	17878.6	13910.8	15376.8	11119.8	16908.8	17550.1	20390.6	13089.3	12139	17855.9	15157.5
95	acceptor	56705.9	55352.7	52921.3	57090.3	53954	60240.1	53412.2	56320.3	63024.7	53527.9	50005.3	42738.1	58674.4	59185.6	56989.6	55721.7	50260.4	50805.7	56336.8	51252.8	49739.6	61809.2	59727.4	64995.1	54703.8	55639.9	54436	54016.8	52313.5	55245.7	61383.8	65115.8	54014.3	58982.3	51474.4	47197	55957.4	54006.2	59602.7	55791.3	56774.6	53275.4	48723.9	49708.5	56767.1	56474.6	55041	57072.9
95	fret	0.765134	0.728703	0.68938	0.7714	0.769311	0.816484	0.715224	0.748455	0.803865	0.705908	0.686286	0.627777	0.7714	0.830176	0.781857	0.767222	0.7714	0.788139	0.754704	0.765134	0.72559	0.750537	0.780811	0.798623	0.775581	0.757832	0.76409	0.766178	0.763047	0.777672	0.791283	0.774535	0.712117	0.811226	0.78395	0.775581	0.767222	0.751579	0.811226	0.78395	0.836505	0.758874	0.734934	0.709012	0.812277	0.8228	0.754704	0.790235
96	donor	6888.06	12152.9	18223.9	19070.5	11851.9	16450.2	13459	22016	19632.2	24555.7	37807.7	19618.8	18089.6	18361	13687.4	10083.5	7229.38	5130.44	12574.8	10336.1	22295.5	17162.4	24364.9	19513.9	12389.4	12537.2	8186.12	11556.2	17097.9	33596.4	18371.8	16385.7	16764.6	15754.1	12590.9	11932.5	13754.6	20048.8	18581.4	14375.4	8624.19	21876.2	7549.19	16724.3	16404.5	11666.4	14899.5	18062.7
96	acceptor	45232.6	37929.8	43674.5	31039.4	40059.4	49285	65484.8	64877.6	46022.8	43537.2	54874.3	46398.7	32903.2	48560.6	46624.9	38504.6	50185.4	36257.1	40607.3	41923.1	48794.4	54168.6	37369.6	36250.5	47374.4	47079.8	54893.1	39983.7	50832.8	27733.5	48349.9	39474.2	50614.5	39555.3	54276.3	41419.2	51720.5	49350.7	48846.2	27390.1	41619.6	47071.7	60099.6	36157.1	45113	32496.5	58521	33900
96	fret	0.867928	0.756943	0.705191	0.619099	0.771502	0.749675	0.82899	0.746562	0.701067	0.639501	0.59165	0.703129	0.645633	0.725846	0.772543	0.792352	0.874263	0.876376	0.763179	0.801749	0.686653	0.759021	0.604852	0.649724	0.792352	0.789221	0.870039	0.775667	0.748637	0.452032	0.724812	0.706222	0.750712	0.715511	0.812218	0.776709	0.790265	0.711381	0.724812	0.655866	0.827941	0.682535	0.888007	0.683568	0.73309	0.736196	0.797575	0.652794
97	donor	11838.2	13397	15676.2	13718.4	9926.09	13673.4	20326.6	14657.8	12237.2	19319.1	14961.7	19230.6	13327.4	18296.3	15861.2	15759.6	15074.8	15318.6	16459.6	14651.2	17826.9	16063.5	15488.3	10557.9	15793	17526.6	11056.2	11324.6	13740.9	14638.2	15651.5	16046.9	18188.2	9899.97	19580.2	16788.9	19801.4	21469.1	21224.6	17552.7	18128.7	17476.6	13265.7	15850.3	20661.7	17853.1	17786.3	20957.7
97	acceptor	61371.7	64785.8	56683.5	66222.9	64197.3	57838.4	63240.9	59811.4	64820.4	64819.3	58714.1	49052.9	63926.3	63713.4	66533.5	66203.5	61931.9	59890.8	67153.2	66980.7	61007.3	67481.8	63800.5	70904.4	64535.7	70719.6	59063.4	64317.6	67613	70136.7	65506.5	69240.6	68797.9	69595.9	57123.8	71148.4	64115.9	61615.6	60402.3	60094.2	67676.8	67658.8	69433.9	61372.3	64534.4	64343.5	61832.8	55545.6
97	fret	0.838056	0.829013	0.78382	0.828009	0.866194	0.808924	0.756718	0.802898	0.84107	0.77077	0.796873	0.718592	0.827004	0.776793	0.80792	0.80792	0.803903	0.795869	0.802898	0.820977	0.773781	0.80792	0.804907	0.870214	0.802898	0.80089	0.842075	0.850113	0.831023	0.827004	0.806916	0.811937	0.790849	0.87524	0.744676	0.808924	0.763744	0.741666	0.739659	0.773781	0.78884	0.794865	0.840065	0.794865	0.757722	0.782816	0.776793	0.725613
98	donor	10465.4	7852.93	4900.84	7090.44	14040.5	6300.2	7898.21	8196.92	10783.8	6270.98	3034.06	10155.7	15855.4	6744.25	8870.31	11169.5	7006.45	15521.6	10894.8	11447.7	9382.29	7918.66	7235.78	10932.1	7029.82	8183.78	36444.8	67898.2	80688.1	67855.8	74835.8	81021.9	71162.9	72584.1	71564.6	71271	72512.6	70255.8	75890.4	76109.6	68366.3	75838.6	82891.6	74090.9	74533.4	85599	80295.2	79627.7
98	acceptor	64619.1	65337.2	62549.5	61205.3	61773.4	73894.2	55403.1	62293.2	51458.5	67130.3	65292.8	69129.9	57281.9	63588.4	62675.3	63517.7	63708.2	56968.7	49341.8	62849.2	77181.9	65489.5	65501.6	60132.5	75291.2	73349.1	31664.5	-5766.86	106.562	-6699.51	-5290.77	1287.33	-4647.7	-3722.1	-4293.27	-3231.6	-2980.06	-3864.04	136.933	-4441.29	-455.429	-3684.62	-5030.3	626.478	-3032.51	-3551.22	-3413.78	-3541.3
98	fret	0.860818	0.893081	0.927544	0.896209	0.815208	0.921269	0.875375	0.883703	0.82659	0.914998	0.955832	0.872254	0.783203	0.904555	0.876415	0.850433	0.901424	0.786296	0.819346	0.846282	0.892038	0.892038	0.900381	0.846282	0.914998	0.899338
99	donor	13268.2	5222.66	12184.1	7916.59	6589.93	8749.46	14575.1	10729	11537.8	28056.8	10584.2	9588.91	6114.79	9160.95	11719.9	16149.8	65749.9	72175.8	74692	69581.7	69567.5	72045.2	64382.6	78640.1	65900.2	68053.2	77542.8	74320	68352.7	69348	65410.8	72473.2	71432.9	72407.3	70865.6	73222.6	66282.1	70978.6	74409.9	63229.3	63717.6	74880.7	78563.3	73639.6	61852.2	75580.8	63397.2	70158.9
99	acceptor	60625.4	52723	64202.9	59748.8	60709.3	69804.8	60218.7	57332.6	56427.2	53846.2	55260.7	60106.1	61270.5	71270.4	69509.9	61683.4	2436.1	2067.65	7505.31	1011.03	-579.092	6519.73	5330.12	-3182.36	2853.49	5526.59	3988.07	3697.36	-2125.96	5722.7	5668.54	-462.582	5872.41	375.792	8004.69	-1968.57	5080.74	9046.73	2026.92	1723.57	4696.26	1512.78	5429.15	6090.58	6560.22	-121.408	1633.33	2217.08
99	fret	0.820366	0.910028	0.839933	0.883444	0.902395	0.888479	0.804614	0.842393	0.830124	0.657309	0.838704	0.862187	0.908753	0.88596	0.85598	0.792585
100	donor	14777.2	13338.6	24579	20022.5	24937.4	18644.9	19305.8	19815	17505.7	20405.7	16688.8	17914.7	21048.1	19524.8	17382.8	25878.2	16899.5	13651.5	15950.4	22938	15655	13437.7	22159.3	16721.9	14811.3	19717.9	30541.1	12094.1	16705.4	20102.1	12979.2	18473.4	22155.2	12167.5	20817.8	11832.8	20540	19528.9	14580	18555	15755.2	14147.2	9096.05	20930.3	9170.41	20537.9	20636	13509
100	acceptor	66551.2	71634.3	58589.4	63937.8	67428.5	64330.7	64484.8	68240.1	65433.8	65019.8	66003.3	71233.5	69755.9	62271	68226.3	63931.6	67609.6	73024.8	67422.2	64954.6	65231.1	69025.4	65935.2	60773.8	77007.7	65843.6	64725.7	66031.9	72107.7	63293.6	65906.3	74732.5	66875.3	65501	69730.1	70013.3	68282.8	60134.2	64084.4	69567.4	77142.5	66856	75805	62708.8	67609.4	63809.5	66411.7	69873.4
100	fret	0.818023	0.843071	0.704511	0.761946	0.729938	0.77482	0.769451	0.77482	0.788811	0.760875	0.798515	0.798515	0.768378	0.760875	0.797435	0.711911	0.799596	0.841979	0.808263	0.739514	0.806097	0.836522	0.748045	0.784501	0.838704	0.769451	0.679241	0.845256	0.811514	0.758734	0.835432	0.801769	0.751249	0.843071	0.770524	0.855104	0.768378	0.754455	0.814767	0.789889	0.829984	0.82563	0.892519	0.750181	0.880377	0.756594	0.763017	0.837613
101	donor	2241.03	3051.28	5358.53	3166.48	2656.96	3463.89	4464.1	3640.56	6172.11	3872.06	6184.29	5470.41	1498.9	2039.44	866.986	5333.61	2856.34	2478.07	2944.4	2841.38	2944.95	4275.24	5669.23	3460.56	2717.33	3650.53	2347.37	2943.29	5606.09	2191.74	3912.49	3752.43	2482.5	2210.02	10708	51887.3	51490.2	47731.4	51053.2	51069.3	52019.1	58247.5	50838.9	51144.6	50491.1	54051.7	55060.7	50330.5
101	acceptor	52069.3	48280.7	42095.4	35076	50993.9	51185.2	45120.6	52517.6	50590.2	44152.2	47083.4	43768.7	42889.1	48975.9	44576.3	45223.2	58708.5	48785.2	48827.1	43943.3	49396.8	47328.8	43731.7	48102.7	44204.9	54421.9	49190.1	53066.6	49773	50857.3	51061	48819	53992.2	45672.3	33163.3	-3647.16	-405.682	-3424.75	-5136.9	-2449.47	-2300.1	-1423.76	-2501.14	527.34	-902.454	8161.97	-3108.37	-1624.32
101	fret	0.958646	0.940598	0.887318	0.917001	0.950286	0.936314	0.910011	0.935085	0.891227	0.919525	0.883964	0.888638	0.966314	0.959832	0.980806	0.894503	0.953882	0.951487	0.943033	0.939377	0.943641	0.917001	0.88529	0.93262	0.941817	0.936928	0.954479	0.947274	0.899063	0.958646	0.928904	0.928904	0.956268	0.953882
102	donor	22169.2	21502	11751.8	16450.2	19583.7	16763.9	16315.1	8292.6	10778.8	5564.14	6235.34	21144.5	15294.4	10989.3	13352.4	16613	22610	18729.8	12601.7	15874.3	5921.58	22276.4	8379.97	8860.53	13856.7	14182.4	8459.4	19949.1	26081.2	17673.4	16728.2	13566.8	10151.3	12367.4	15223	15890.2	4166.16	10278.4	15234.9	14150.6	8892.3	13423.8	11735.9	10739.1	23674.4	15135.6	15064.1	15667.8
102	acceptor	44539.9	35079.3	36648.4	40242.5	41953.5	40626.3	39998.8	42750.8	36240	52565.6	50618.4	48595.2	41068.6	44371.5	37216.5	40182.7	35139.3	39264.4	46237.4	35301.2	41047.2	33292.4	36721.5	40304.8	38664.7	40208.7	30009.7	44115.3	43596.3	35114.4	42419	42957.5	43838.9	38559.9	38580.9	37396	45892.1	31007.6	32725.6	40650	40618.2	34233.4	33967.4	45949.6	31851.4	44655.6	34789.1	48821
102	fret	0.667278	0.620474	0.757629	0.709561	0.682018	0.708404	0.710718	0.837822	0.770749	0.904871	0.890754	0.696883	0.728164	0.800929	0.736365	0.707249	0.608448	0.67747	0.786379	0.690007	0.874207	0.598655	0.814369	0.819282	0.736365	0.738715	0.780352	0.688863	0.625978	0.665022	0.717676	0.760007	0.811918	0.757629	0.716514	0.701483	0.916502	0.750513	0.682018	0.742247	0.820512	0.718838	0.743425	0.810694	0.57388	0.746965	0.698032	0.757629
103	donor	19654.5	17969.1	13780.7	16346	17007.7	18750.7	15633.9	21805	22670.5	18367.1	20663.9	18069.8	14324.9	7619.18	15264.7	15645.9	16365.2	18170.5	18268.8	17482.4	19239.8	12306.2	13612.9	16480.3	19517.9	21970.5	10975.6	18007.4	14298.6	19019.2	22977.4	19340.4	11862.7	14521.5	19942.2	15533.3	10282.8	15849.7	15096.9	12080.9	16545	14082.8	14123.5	13095	15120.9	11428.8	10342.7	14619.8
103	acceptor	39983.3	40736.9	29261.4	36113.3	38327.7	31191.5	29941.6	49441.5	36912.5	42224.9	37595.5	32449.6	34845.5	36694.3	35445	36539.7	41842.3	36776.4	34801	28897.8	36930.7	45491	35937.7	40282.9	36832.8	37756	45084.3	43289	25592.2	42092.6	31822.1	46017.9	39573.4	44915	41058.4	38936.7	39119.7	37452.6	38684.7	35332.9	41147	37726.9	26143	34266.1	36556	37259.8	32925.3	37676.4
103	fret	0.67068	0.69373	0.679699	0.688719	0.692728	0.624598	0.656653	0.69373	0.619591	0.696737	0.645633	0.642627	0.708767	0.82815	0.698742	0.699745	0.718792	0.669678	0.655651	0.622595	0.657654	0.786999	0.724808	0.709769	0.653647	0.632611	0.804059	0.705759	0.641626	0.688719	0.580544	0.703754	0.768939	0.755898	0.672684	0.714782	0.792016	0.702752	0.718792	0.744865	0.712777	0.727817	0.64964	0.723806	0.707764	0.764926	0.760913	0.720798
104	donor	11709.3	11633.8	13302.5	13101.2	10539.6	9831.07	15365.2	5426.85	6904.71	9453.75	2718.5	12885.3	13105.4	8764.08	9736.74	4125.08	9246.22	7881.56	7447.64	7405.71	10881.3	11682.1	8003.14	7214.95	11147.5	8271.46	10833.1	8478.99	13359.1	12543.6	4921.66	8489.47	11520.7	6062.02	17379.7	18054.7	12772.1	9975.72	13084.5	12489.1	13837	13809.8	11088.8	9497.77	10711.5	15073.8	20473.7	12468.2
104	acceptor	35565.4	46823.9	44656.9	40259.5	48521.8	49531.8	56501.5	47482.5	45428.7	44187.3	54728.3	44083	37724.2	49296.7	48607.7	46740.9	43253.4	40419.4	42972.2	45749.9	37756.6	48073.4	47197.4	42358.7	45487.5	40325.7	40523.4	26332.7	21799	45911.9	39562.3	39888.3	49109.1	51922.1	34687.2	47848.7	39832	31732.7	35974.3	38625.3	42005.9	39127.6	35386.8	40987.6	42040.4	45689.7	44727.3	46205.4
104	fret	0.752835	0.800793	0.770897	0.754956	0.821205	0.834137	0.785825	0.897155	0.867713	0.823358	0.952169	0.774092	0.742242	0.849271	0.833058	0.919083	0.823358	0.836296	0.85252	0.861196	0.776223	0.804018	0.854687	0.854687	0.802945	0.829823	0.789031	0.756017	0.620097	0.785825	0.889504	0.824435	0.810455	0.894967	0.666684	0.7264	0.757078	0.761326	0.733786	0.756017	0.751774	0.73907	0.761326	0.811529	0.796509	0.751774	0.686508	0.787962
105	donor	37080.3	32574.8	30683.1	31600.1	34309.9	36004	28489.5	29311.8	33389.5	31671.7	32494.1	35182.4	24535	35095.4	33264.9	32726.5	25801.2	39850	28373.3	31997.3	28632.8	25465.2	26432.3	27383.3	31883.2	26289.6	27954.5	24933	32192.8	32682.6	27483.5	33046.5	29903.2	32951.2	37385.7	27807	32098.9	25534.1	26741.8	29883	35810.6	25679.5	26133.1	26887.3	32174.7	29731.4	29803.7	24434.8
105	acceptor	68375.9	71111.9	78087.1	74096.8	84416.4	74009	81199.2	89912.8	80524.8	84765.3	76288.6	76972.9	79879.9	81619.5	78264.1	79433.8	83372.2	78072.1	84278.8	71532.1	76963.4	76256.4	73863.1	77801.8	84991.4	77857.9	78922.5	77385.8	76550.5	79052.4	80031.2	72783.1	78227.4	74009.1	81402.5	91139.5	69950.3	76443.6	79117.8	83771.1	83260.1	81050.1	80460.8	82083.7	84320.5	79050.9	75163.8	81881.6
105	fret	0.64825	0.685554	0.717818	0.701216	0.710984	0.67281	0.740234	0.753849	0.707081	0.727571	0.701216	0.686533	0.765503	0.699257	0.702194	0.708058	0.763562	0.662013	0.748017	0.69045	0.728546	0.749961	0.73634	0.73926	0.727571	0.748017	0.738287	0.756764	0.704149	0.707081	0.744126	0.687513	0.723671	0.692408	0.685554	0.766473	0.685554	0.749961	0.747044	0.737313	0.699257	0.759678	0.754821	0.752878	0.723671	0.726596	0.715866	0.770354
106	donor	14644.3	15087.2	17652.2	11169.6	10770.2	17474.9	18907.5	14962.3	16407.5	14697.4	13461.7	11899.7	15773.9	14231.4	13753.4	9912.17	10560.7	15924.2	16132.9	16447.1	22563.2	15251	15191.2	15951.2	12597.7	20911.5	15539	17486.9	14066.8	11664.9	10866.7	12889.4	15770.1	16788.2	17047.8	15948.2	25136.5	75528.8	74000.5	72216.4	78413.3	80825	66222.3	80398.6	70423.4	71181.9	78466.4	75334.3
106	acceptor	58316.4	65975.7	55772.7	64466.7	61060.6	56797.6	62742.1	59598.2	57972.2	61286.5	62192.8	59539.7	57167.7	56796.5	55155	58717.2	58559	50864.1	55676.3	52647.7	53854.6	61313.2	65451.1	68151.4	70971	64522.3	64846.4	74635.7	65035.6	60178.7	63402.8	69248.4	60456.4	64400.6	67802.3	65859.5	41580.9	-1413.56	458.418	2995.85	3154.39	-2795.12	5332.79	4380.18	8430.29	4802.82	99.576	-897.511
106	fret	0.799625	0.813753	0.759289	0.852134	0.850113	0.764329	0.768361	0.799625	0.779451	0.806689	0.82183	0.832938	0.783485	0.799625	0.800634	0.855166	0.847081	0.761305	0.775418	0.762313	0.704912	0.800634	0.811734	0.810725	0.849102	0.755258	0.806689	0.809717	0.82183	0.837989	0.854155	0.84304	0.793572	0.793572	0.798616	0.80467
107	donor	14134.1	11895.9	14894.6	16163.1	12550.9	8242.22	12146.5	11658.5	8311.92	10935.1	10041.4	8288.69	13907.4	9297.88	14545.4	14998.8	11384.7	11924.8	9356.28	44290.5	51867.9	48575.9	44866.4	45775.1	61306.1	48795.7	58161.1	53310.4	56685.9	59048.4	60814.3	59123.1	61703	58896.4	62577.1	51645	54351.6	54891.1	55696.8	54170.8	50427.9	58555.4	51404.4	51508.7	55124.1	52641.6	57519.2	54594
107	acceptor	48594.4	40689	45552.8	36443	37216.4	41287.1	40310.5	44516	44979.3	50036.2	54226.7	43267.6	44384	44192.2	39629.9	45942.7	47364.1	47848.6	38797.2	14936.5	692.417	-1997.8	-861.001	-754.321	-8902.58	-1702.02	602.557	-2586.78	-3568.97	1024.72	-6106.44	-3145.82	-3978.57	-2170.74	-3493.47	4712.9	151.65	-1218.48	-4663.21	1661.19	-2032.99	-2528.68	-755.492	-3761.34	1079.71	1461.98	-1501.16	-1632.57
107	fret	0.774994	0.774104	0.753547	0.692459	0.74815	0.833687	0.768762	0.792694	0.844021	0.820695	0.844021	0.838861	0.761616	0.825902	0.731873	0.753547	0.805868	0.800609	0.805868
108	donor	7659.64	5852.59	6492.94	6719.06	2274.59	5276.84	9289.98	5020.32	2624.22	1911.65	1592.43	2688.82	3004.25	3287.37	6926.18	-459.747	3876.42	-127.219	872.266	-197.525	8267.69	794.359	7988.37	4436.97	1069.88	811.461	4836	1696.94	2128.27	-1371.82	3291.17	323.119	6156.61	3454.59	3551.49	1657.03	4786.6	1757.74	-351.438	1423.31	7169.4	4013.23	6320.03	3412.78	2688.82	1668.43	7205.5	61192.9
108	acceptor	61971.4	63527	73808.3	64724.8	65392.3	76413.9	58717.2	73645.8	68760.2	69295.2	62794.8	72209.4	71663.9	65344.1	75371.3	72530.2	67853.5	66325.9	78248.7	68287.9	76349.4	62119.3	67225.9	63606.2	64040.6	63135	68302	70831.7	59426	75096	72006.8	69498.5	63566.2	67457.9	59742.8	59581.2	68806.8	75118.6	69868.4	61048	76968.8	63467.4	68008.1	79672.4	68685.5	65021	57316.8	21393.3
108	fret	0.889624	0.915499	0.918888	0.906479	0.966655	0.935877	0.863931	0.935877	0.963222	0.973529	0.975824	0.964366	0.959793	0.951804	0.915499	1.00694	0.946108	1.00231	0.988468	1.00345	0.901977	0.987317	0.894111	0.934742	0.983865	0.987317	0.933607	0.976971	0.96551	1.01853	0.956367	0.995383	0.912114	0.951804	0.943832	0.972383	0.934742	0.976971	1.00462	0.976971	0.91437	0.94042	0.915499	0.958651	0.962079	0.974676	0.888504
109	donor	6908.83	18652.9	35132.7	36539.2	12620.4	16191.5	23217.6	26872.6	14323.7	21062.7	14073.7	9973.48	5086.16	6212.02	3599	11930	5184.55	16175.4	19482	21885.3	9581.53	3771.59	7826.61	9486.36	18422.2	20706.2	25298.4	28034	20593.3	26132.3	12194.5	23585.4	10047.7	12601	4166.77	8525.03	12115.5	7139.48	3844.17	4884.54	9605.72	8757.3	12678.4	24741.9	25283.9	32406.8	14835	10526.7
109	acceptor	46068.3	31165.7	16519	20206.3	56970.9	41417.9	42800.3	29816.4	43031	43155.6	36841.9	46080.5	37619.1	52063.3	56532.7	59190.9	33921.1	42251.1	52138.4	39695.5	59698.7	44089.4	44666.2	52913.1	33381.8	40177.5	33860.6	25304.5	33411.7	35339.6	43373.9	29459.5	38063.7	39412	42128	48654.5	47041.9	34484	11143.5	36659.3	34087.3	45104.6	39042.9	42862.8	34885.9	29899	37368	42536.8
109	fret	0.869901	0.625484	0.320265	0.356179	0.819081	0.719021	0.6483	0.525663	0.749908	0.671825	0.723592	0.821696	0.88093	0.893582	0.940123	0.832122	0.867348	0.723592	0.728153	0.644512	0.861376	0.921138	0.851099	0.84768	0.644512	0.659624	0.572222	0.474001	0.618779	0.57516	0.780345	0.555496	0.790982	0.758008	0.910328	0.851099	0.795398	0.828653	0.743602	0.882622	0.780345	0.837315	0.755312	0.63406	0.580049	0.480142	0.716274	0.801564
110	donor	15211.6	20936.8	13319.5	19388.5	22590.8	20702.8	16858.5	13898.3	22993.7	16405.9	15471	22222.6	17835.1	13300.1	22462.7	22118.8	19905.3	17046.7	35757.3	106206	102596	101071	100788	104653	99104.6	107020	117251	106399	101702	100059	100057	104812	110858	109600	113912	98679.4	112133	108728	115970	91735.6	91525	105261	104053	98902.2	113066	116998	106063	97692.7
110	acceptor	71826.5	81358.9	79998.5	80093.5	83047.6	77443.9	65907.4	76344.9	84307.3	74241.5	73824.7	75448	79099.9	72469	75899.2	77575.5	74691.6	73292.5	53004	-7681.17	1161.35	-1340.45	-4084.92	-2288.02	3340.91	-1568.45	-695.982	3512.15	828.509	-3438.14	-1625.69	6824.66	-7720.43	-3775.59	3105.1	74.41	1114.67	313.509	-6033.56	-71.468	-337.861	-2332.52	-398.924	-3079.69	-1259.73	-4643.6	-5773.34	-4479.25
110	fret	0.825641	0.795584	0.856966	0.80523	0.785976	0.78918	0.796654	0.84614	0.785976	0.819186	0.826717	0.772119	0.815961	0.845059	0.772119	0.77851	0.78918	0.811666
111	donor	14186	14615.6	11924.6	8495.66	11185.1	12717.8	19368.6	16476.6	12846.7	14359.4	20398	16149.8	74363.6	79952.7	72482.7	87987.3	77939.8	73315.8	74612.2	69415.8	80825.7	68237.5	89391.1	77611.5	71089.6	69642.9	68509.1	73047.3	66261.5	67768.1	79311.4	58542.9	73745.3	76204.7	74581.5	79283.8	80652.3	68383.3	80124.5	68908	61803.1	68904.9	76835.2	81792.2	74070.6	76798.4	81476.2	74702.7
111	acceptor	61937.2	51381.9	60628.9	59397.9	63633.8	52929.6	60335.1	58114.3	56716.9	59903	62413	49260.6	-14282.1	-9256.37	-6377.35	-4838.14	-803.769	-3723.69	-11361.3	-2325.47	649.634	-1678.5	-3577.22	-3360.8	152.552	33.472	-671.659	-2056.03	-104.844	3577.61	-6516.86	-47.161	4550.36	-807.734	-55.259	3471.94	-4576.59	-3797.88	-5886.51	-3262.57	-2484.72	-6098.2	745.007	-1837.46	-4130.62	-276.843	-4113.65	-6663.59
111	fret	0.813628	0.77876	0.835929	0.874365	0.850845	0.806214	0.756682	0.77876	0.815748	0.806214	0.753535
112	donor	696.899	2298.12	-258.34	983.47	2945.29	1289.15	5393.09	3470.67	-461.328	5305.92	2886.78	5262.94	336.296	-406.401	1748.85	-3801.08	2010.35	4756.66	-8038.75	-910.29	4111.88	5815.78	3495.75	-1211.19	7518.49	1984.08	1778.71	6711.32	1040.78	-3491.82	3261.71	-187.89	-672.674	-1335.37	530.926	2779.32	1875.42	1795.42	972.724	3533.96	1926.77	5437.27	3116.04	2269.46	1255.71	5500.55	7584.17	-2052.99
112	acceptor	64984.8	67146.3	67672.4	70075.9	59427.6	56409.2	67600.2	56727	65941.9	56110.2	53179.5	55238.4	62636.3	61018.8	65215.8	67295.7	64597.2	63519.5	54056.3	67500.6	53345.7	71189.7	55108.5	69461.3	65549.5	51302.4	62439.4	46272	54906.1	70341.4	60254.8	59085.2	62928.9	59254.5	54588.2	58544.9	59033.7	65182.7	62161.4	53762.4	70507.7	54143.3	55228.2	67690.4	68754.4	75320.8	61597.2	49706.2
112	fret	0.989397	0.967126	1.00352	0.985871	0.953137	0.977656	0.926494	0.942686	1.00709	0.913828	0.948488	0.912679	0.994105	1.00709	0.974142	1.05954	0.969463	0.929956	1.17442	1.01419	0.928802	0.924187	0.940367	1.01773	0.896636	0.962456	0.971802	0.873855	0.981174	1.05233	0.948488	1.00352	1.01062	1.02248	0.990574	0.954301	0.969463	0.972972	0.984696	0.938051	0.972972	0.909234	0.946166	0.967126	0.982348	0.932267	0.890926	1.04276
113	donor	23403.9	15551.2	20227.8	22251.3	19611.7	16292.1	22261.9	30122.5	18129.8	17452.6	13556.9	20071.1	17914.7	17439.4	21143.9	33574.8	28308.8	39369.4	33694.3	26646.4	18259.9	15118.4	21138.6	29649.8	23324.2	16310.7	20211.8	23061.3	22362.9	12993.9	18108.6	18159	12245	20304.8	17497.8	14396	22232.7	15803.5	21019.1	18252	14932.5	19263.8	14728	20102.9	14165	17197.7	15649.5	19792.2
113	acceptor	65013.6	70927.5	81774.6	92157.9	84344.5	80312.2	72341.9	91635.1	75247.1	80436.9	70352	79423.3	92426.6	84573.2	72858.2	75620.3	72017.6	67591	79101	84507	83135.5	84860.8	86109.6	78751	78284.1	77581.9	72898.3	75992.8	85526.7	83933.5	79816.7	79350.9	71956.9	79666.3	82426.2	78748.6	76686.6	77116.6	72150.6	83890.8	80823.1	81135.6	85094.7	89496.2	85520.5	76864.9	78076.3	84709.6
113	fret	0.735098	0.820549	0.8022	0.805257	0.811369	0.831771	0.764549	0.752356	0.806276	0.821568	0.838917	0.798126	0.837896	0.82871	0.774716	0.692538	0.717858	0.631928	0.701649	0.760483	0.819529	0.849131	0.803219	0.726983	0.770649	0.826669	0.782855	0.767598	0.793034	0.865485	0.81545	0.813408	0.85424	0.797107	0.824629	0.845044	0.775734	0.82973	0.774716	0.821568	0.844023	0.808312	0.852196	0.816469	0.858328	0.817489	0.832792	0.81035
114	donor	8996.23	6440.1	8868.57	11541.2	11701.5	12879.4	13690.1	13179.4	8601.12	11919.5	9043.76	11845.9	15566	17032.7	14010.7	9322.39	14466.3	9931.83	10192.8	5611.66	7685.08	10950.4	15751.4	9338.23	12666.9	15293.8	11029.6	9423.96	13886.7	9296.3	10552.5	17579.7	9065.19	8121.2	15615.3	14867	11339	12954.8	12145	8527.5	12959.5	12898.9	10486.3	11133	9988.68	20036.2	7595.62	11627.8
114	acceptor	41462.6	44412	42302.2	42622.1	38791.4	40416.6	45761.4	47059.2	45212.3	45846.7	40833	44432.5	41586.8	46559.1	47632.6	45116.5	40773.6	41589.8	46020.8	51657.2	54526.2	49185	47283.1	43606	48329.1	42164.7	43413.8	41383.7	51972.5	47696.4	43488.6	45200.6	42481.5	42373.6	41707.1	42957.9	50717.6	47003.8	40080.2	48928.1	46127.8	39837.7	49137	45664	42669.6	45472	46312.5	46169.1
114	fret	0.821883	0.873666	0.826863	0.787011	0.768074	0.758105	0.770067	0.781031	0.839811	0.793986	0.818895	0.79	0.727196	0.732182	0.773058	0.828855	0.738165	0.806939	0.818895	0.901536	0.876652	0.817899	0.75013	0.823875	0.791993	0.734176	0.796975	0.81491	0.789004	0.836823	0.804947	0.720214	0.823875	0.838815	0.727196	0.74315	0.816902	0.784021	0.767077	0.851761	0.781031	0.755115	0.823875	0.80395	0.809928	0.694279	0.858732	0.798968
115	donor	9960.34	10481.7	10732.5	11327.5	12324	11862	11649.8	10586.2	12358.1	13509.7	11466.1	10778.6	10897.4	10678.6	15540	11044.8	8847.26	10603.8	11489.2	13324.9	19369.8	12428.5	10971.1	12314.1	43563.9	55842.9	43481.4	53664.1	49235.9	52670.9	54353.7	48673.9	48010.7	48985.2	51870.1	56951.6	51013.3	57445.4	59065.6	57382.7	66421.6	52742.4	52911.7	59760.7	56265.3	59143.7	55841.8	51563.3
115	acceptor	40076	51515.4	38596.5	42271.1	44456.4	48604.6	38843.2	45107.1	51046.2	48770.8	41719.9	49732.1	41039.7	46949.2	43569	47483.3	48168.2	35561.4	40190.8	51097.6	38735.2	39549	46591.8	34758.2	10808.4	-3430.87	-90.167	-3700.2	-3047.61	-2031.62	-4100.96	2704.89	5688.41	-1906.32	-1950.27	-1728.14	1526.84	-2138.95	-2146.8	5847.45	-5526.57	-871.142	1066.27	-1468.2	-2882.28	-1999.29	-1976.03	-983.22
115	fret	0.800666	0.831167	0.782201	0.788944	0.783045	0.803997	0.769466	0.809806	0.804829	0.783045	0.784733	0.822171	0.789785	0.814766	0.736668	0.811461	0.844953	0.770319	0.777969	0.793142	0.666836	0.760934	0.809806	0.738414
116	donor	10410.7	8515.2	9586.69	10350.7	13522.8	5778.84	2678.38	16364.1	11700.3	5872.64	6674.46	6060.23	13397.8	15340.8	8457.88	8078.14	9054.53	8188.87	14385.9	10414.6	10667.9	10161.2	7064.63	14193.1	23925.7	8981.57	10582.6	13624.5	3613.73	4250.76	9682.44	3794.15	11359.7	9082.53	8657.85	6735.69	12084	17894.8	13674	3453.49	6977.99	4956.18	4719.08	6974.09	9680.48	13588	8625.93	5212.16
116	acceptor	59179.4	65001.2	64309.6	58944.8	55887.7	59732.2	49455.4	61360.9	63262.5	59529.8	62410.2	62651.4	55179.1	52999.2	61379.4	56589.7	59906.1	54037.7	56824	68820.6	63954.7	61335.7	58129.3	60677.9	53835.2	62170.5	66428.6	69438	50301.8	62974.6	59066	55601.8	56158.9	60888.7	56870.1	62058.5	62358	57724	58753.5	64130.9	57057.6	60751.8	66197.2	63394.8	50087.7	61705.5	60188.2	69122.8
116	fret	0.850059	0.884474	0.870153	0.851017	0.8049	0.912089	0.949075	0.789468	0.844308	0.910188	0.90353	0.912089	0.8049	0.775941	0.878749	0.874929	0.868241	0.868241	0.798152	0.868241	0.856762	0.857719	0.892102	0.81068	0.692334	0.873974	0.862504	0.835674	0.932974	0.936766	0.859634	0.935818	0.831834	0.870153	0.868241	0.901626	0.837594	0.763359	0.811642	0.949075	0.891149	0.924437	0.933922	0.900674	0.837594	0.81934	0.874929	0.93013
117	donor	23641.7	29240.6	28338.8	14277.4	25069.6	22427.1	24859.2	21772.5	24556	26176.1	24356.1	24685.4	22293.9	20339.7	22158.7	25284.9	30827.8	22959.1	35582.9	85911.9	95087.9	81645.4	80074.5	91897.9	88595.9	93524.7	95229.8	87668.1	94027.8	86708.4	83736.6	77773.8	90249.8	89804.7	95113.9	91798.5	87733.7	91228.8	81728.4	101149	78017.1	81976.5	88145	95729.9	87350.4	82509.5	82804	101390
117	acceptor	60661.4	60905.4	58354.8	57057.2	70762.1	54818.7	55542.7	57606.5	53955.4	62587.1	62786.6	52135.9	68239.1	71163.9	61784.5	61844.8	62423.3	58081.4	52318.7	3544.46	-470.204	2300.25	5317.65	-1651.63	2862.05	5166.89	231.702	5603.55	182.873	4660.77	1417.34	1790.9	-2426.34	4839.56	3946.2	8665.9	-334.213	4335.8	1854.91	1792.03	3681.56	421.002	-250.894	4936.03	404.723	2414.22	2823.19	6290.17
117	fret	0.719197	0.675426	0.673394	0.800052	0.738591	0.710022	0.690676	0.725318	0.687621	0.704928	0.720217	0.678471	0.753925	0.777478	0.735527	0.710022	0.669332	0.717157	0.595443
118	donor	16015.4	19527.1	23365.6	26251.2	15820.7	17029.3	22296.9	18418.3	17644.1	15685.5	14259.6	21266.9	17282	17735.9	22024.9	23299.6	20135.5	19783	23257.7	20776	12194.7	21509.9	20027.7	21569.5	25845.6	17072.8	17135.6	20090.4	12418.4	19214.9	21675.7	19229.4	14914.6	18283.1	17233.7	19855.5	19110.3	15914	21656.4	17460.7	17275.6	18490.7	17480	13007.5	20632.8	16759	17494.5	70641.7
118	acceptor	79349.5	71359.4	75164.6	67150.4	83883	76506.9	71328.9	80324.4	86125.6	85423.5	80780.8	77708.9	87648.3	74507	77187.5	83626.7	77345.1	71092	87765.3	83002.6	80544.6	84363.3	86678.8	77346	79010.4	79323.6	78970.5	81640.3	81866.6	83359	70138.7	80821.8	80705.2	76216	80952	85112.2	88055.2	73285.1	73898.5	83157.1	80391.2	80489.1	76484.6	84390.4	82366.2	76830.3	74253.6	25904.2
118	fret	0.831769	0.785265	0.762611	0.718486	0.841096	0.818311	0.761582	0.81314	0.829697	0.845245	0.850433	0.785265	0.834877	0.807968	0.778051	0.782172	0.793516	0.782172	0.790421	0.799709	0.868093	0.796612	0.812106	0.782172	0.753359	0.82245	0.821415	0.802807	0.868093	0.81314	0.763639	0.807968	0.844208	0.806934	0.82452	0.811068	0.821415	0.821415	0.772901	0.82659	0.823485	0.81314	0.814174	0.866014	0.799709	0.821415	0.809001
119	donor	20994.6	17914.4	14330.3	19938.5	21169.9	17585.8	19415.9	22626.3	24076	18573.6	14955.4	26697.6	14384.3	21204.1	20550.3	16717.1	22346.2	21656.1	17862.5	20606.6	15266.2	15626.7	20821.5	23166.5	13330.3	26729.6	20517.3	21031	29719.5	20034.4	16332.3	27767	24379.2	30841.8	14952	18960.6	100119	87140	99608.8	67123.7	64158.1	73747.3	69086.1	71665.9	64625.5	81542.8	72128.9	73835.5
119	acceptor	49082.5	57788.3	49581.5	50751.8	59773	53643	47475.1	41732.1	48622.7	55601.5	60155.2	53052.3	58227	47902.9	47385	47461.5	47890.8	52897.8	45351	59077.2	44523.5	50705.3	48369.5	45238.2	47031.2	50027.6	52103.2	50992.7	53166	36787.8	54107.7	51157.9	46469.5	42248.6	47624.4	48375.1	-2501.6	218.246	-529.223	1953.99	538.535	1699.3	-1384.29	-3089.47	3201.7	-2293.37	-4231.7	292.224
119	fret	0.700263	0.763454	0.775425	0.717983	0.73852	0.75291	0.710357	0.648631	0.669259	0.748979	0.801085	0.665592	0.802451	0.692748	0.697752	0.739817	0.681563	0.70909	0.717983	0.741156	0.745061	0.764779	0.699007	0.661937	0.779442	0.652245	0.717983	0.707825	0.641437	0.647429	0.76876	0.648631	0.65587	0.577491	0.76081	0.717983
120	donor	24032.4	22680.6	24447	24666.6	22184.2	26626.2	22800.3	30906.1	100862	88266.4	92720	98441.7	92023.6	102456	90914.3	92470.9	92189.1	47558.6	1166.63	-3732.6	-362.123	-879.902	308.039	3521.21	-2724.9	-3599.88	-1651.65	3.27033	4.90925	689.818	-496.484	-3268.89	668.517	719.312	-1876.13	-681.638	-365.4	-752.096	337.533	-450.604	2302.14	2367.68	560.374	1405.86	298.208	607.892	-2610.2	686.541
120	acceptor	64985.4	70656.5	58321.8	71506.7	69673.4	79235.5	69445.4	55651.5	-3242.46	706.884	-3042.61	-2983.03	-1008.17	-1347.76	-1759.58	-936.388	1187.36	1041.76	-719.821	2353.65	2237.28	2037.36	291.914	-470.824	-617.494	-771.305	-1388.84	16.017	-759.535	-3134.64	3168.01	-5531.49	2502.7	1172.55	-1318.76	-1050.72	-3096.62	-3786.4	2317.19	-942.012	-3066.49	918.312	-33.414	1611.51	-2647.23	-984.146	-1829.59	1024
120	fret	0.729897	0.756933	0.704276	0.743376	0.758066	0.749015	0.752405
121	donor	11692.2	11626.8	12466.2	9003.31	11402.1	10267.3	10060.6	9786.82	4758.58	3366.34	10287.1	11718.9	16232.3	34134.2	10274.1	6965.32	10131.2	11146.3	13298	9295.19	11704.3	11409.8	21016.8	8625.33	2409.77	4095.61	4951.44	5925.23	11471.8	8691.62	12684.9	7332.11	4928.19	5097.81	7820.29	10541.9	20603.6	8849.19	3278.52	7449.2	14981.2	10089.9	14701.4	12496.4	15117.3	13942.9	12226.9	16674
121	acceptor	53505.4	48031.8	45573.5	57503	49105	52061.3	47242.1	42382.3	55743.1	62504.3	52572.7	48312.3	47027.3	32868.9	45009.7	46067.7	52865.3	49002.8	51368.9	51280.3	39236.5	49837.4	48998.3	45157.8	46932.1	50013	52150.5	54500.3	48572.4	54563.4	37901.7	49254.9	54769.4	46653.6	46485.2	51598	34334.9	52002.6	51289.5	52743.4	39565	35628.7	42483.8	60188.1	37496	46311.5	48845	48372.4
121	fret	0.821054	0.805521	0.785307	0.864506	0.811926	0.835616	0.824697	0.81284	0.921528	0.948781	0.836523	0.804605	0.743559	0.490277	0.813753	0.868998	0.839243	0.814667	0.794511	0.846473	0.770525	0.813753	0.699372	0.839243	0.951406	0.924176	0.913572	0.902043	0.809182	0.862707	0.749157	0.870793	0.91711	0.901154	0.856404	0.830155	0.624688	0.8546	0.940016	0.876172	0.72578	0.778848	0.742626	0.828337	0.712597	0.768673	0.800021	0.743559
122	donor	11557.2	16738.3	13929.2	15496.9	14736.9	21703.8	23072.6	16176	18026.1	12678.3	21170	19369.9	19566.5	12948.7	22493.6	19010.2	22903.4	23826.7	20296.8	19985.9	19948.9	16452.4	14860.8	19286.6	16247.5	14368.8	18505	21375	14381.9	17232.7	14767.8	18177.4	19797.6	15919.9	15380.2	15197.9	21567.9	13857.7	22013.5	18937.5	17949.9	18680.2	20458.8	16875.3	19179.3	17105.2	15564.8	15749.5
122	acceptor	61535.8	62029.4	62277.5	58269.1	62580.8	65571.7	61063	64484.8	58868.1	74439.3	58295.6	56867	64503.5	72803.8	57803.8	63402.5	60011.1	54205.6	57611.6	59396.9	74995.9	61173.5	65167.4	63607.5	60994.3	65140.4	70580	60839.6	74152.3	58488.2	62059	63011	59553.3	66412.3	68977.9	69277.5	64250.9	62237.8	57088.8	72461.3	63082.1	61744.4	60646.2	65125.2	66078.1	64153.5	58285	57379.7
122	fret	0.841567	0.787581	0.816708	0.78981	0.808842	0.751056	0.725856	0.799878	0.765396	0.854075	0.733502	0.745559	0.767609	0.849521	0.720406	0.769823	0.723675	0.694389	0.738977	0.747757	0.78981	0.787581	0.814459	0.767609	0.78981	0.818959	0.792056	0.740073	0.837032	0.772039	0.80772	0.776475	0.749956	0.806598	0.817834	0.820086	0.748856	0.817834	0.721495	0.793172	0.778696	0.767609	0.747757	0.794289	0.775366	0.78981	0.788696	0.784241
123	donor	13107.5	10516.6	7056.81	13679	10636.2	7400.12	12917.9	14181.6	13015.4	11228.9	12729.2	12136.4	12010.4	9722.26	11399.2	11580.5	11656	14585.6	13653.3	11533.6	13235.4	15132.3	10495.4	13205.9	8514.71	10220.2	7162.66	12551.5	11778.4	12507.4	13424.1	10785.3	13840.1	9655.08	9714.9	8608.59	9980.89	10947.3	12635.3	11995.6	9309.01	13205.9	10863.5	10586.5	13447.1	15022.8	13434.2	7178.3
123	acceptor	40550.6	48622	42391.6	39322	42120.4	44481.3	28994.3	41594.8	40332.5	40878.2	38698.6	34153.5	45664	33177	48200.5	40437.2	45222.7	36589.7	35026.8	36334.8	41909.6	40407.2	45713	40349.9	41016.1	42594.2	40644.4	41572.9	44966.4	34266.9	38610.1	39330	36889.2	33024.7	32998.2	38078.5	39865.1	42063	45367.6	46505.8	45775	45679	43400.1	43327.4	36956.9	35062.5	38788.7	46157.6
123	fret	0.755879	0.821868	0.856965	0.74144	0.79804	0.856965	0.692095	0.745293	0.755879	0.784656	0.752032	0.737584	0.791352	0.773161	0.808536	0.776995	0.795174	0.715365	0.719235	0.758762	0.759723	0.727933	0.8133	0.752994	0.828529	0.806629	0.85034	0.768365	0.792308	0.73276	0.742403	0.784656	0.726967	0.77412	0.772202	0.815205	0.79995	0.793263	0.781784	0.795174	0.831373	0.776037	0.79995	0.803767	0.73276	0.699861	0.742403	0.865472
124	donor	27316.9	38891.9	37193.4	34069.5	37248.7	42046.3	30689.6	34464.3	38189.4	25487.3	36008.2	27531	33166.4	36920.5	30901.6	27761.3	32014.5	31049	30203.4	27351.6	29491	36524.3	32372.5	33905	32339.9	34004.3	31171	29215.9	35474.5	40700.2	46473.2	38923.8	30894.5	36135.1	35351.8	38446.7	25780.8	33148	35750.9	39926.8	38020	39505.8	36218.8	37209	38418.4	41533.1	33313.1	31018.6
124	acceptor	26423.8	28175.4	18247.3	28383.1	17964.3	21593.5	25336.1	23272.6	23782.7	26477.7	19473.8	29046.9	19438.2	27913.5	22794.8	32001.5	21594.1	20109.1	27520.8	23387.1	24824.6	27318.9	19910.6	19863.6	28431.4	25235.9	26099.7	29025.6	25156.8	19150.9	16581.8	16236.9	21554.7	18523.7	21095.9	18329.3	26994.4	17729.2	25146	24540.5	13473.1	21874.1	24156.3	19728.2	20649.8	13989.8	24739.5	25527.9
124	fret	0.491874	0.420609	0.329505	0.45451	0.324995	0.339613	0.452411	0.403408	0.383854	0.509239	0.350776	0.513299	0.369596	0.43021	0.424883	0.53546	0.402327	0.392571	0.476404	0.460794	0.456607	0.428081	0.380574	0.369596	0.468096	0.425949	0.455559	0.498023	0.415264	0.320473	0.262977	0.294251	0.410954	0.338492	0.373995	0.322736	0.51127	0.34856	0.413117	0.380574	0.261808	0.356332	0.400164	0.34633	0.349674	0.252432	0.425949	0.45136
125	donor	70953.2	63178.4	66542.7	58366.3	67295.9	73924.1	63108.7	66431.2	75943.8	59426.4	68152.4	73190.5	68138.4	81074	63714	67123	62550.8	61543.7	60729.1	55886.3	57894.9	72786	67245.7	62455.9	130225	160358	130869	140499	132685	132543	133901	113517	131848	136027	131399	120051	122098	137533	141818	123758	139760	135899	139073	124539	127092	135650	112332	118413
125	acceptor	55613.6	65497.3	55014	69819.6	68246.5	65319.6	58777.8	58966.2	70758.1	64167.2	53506.4	63535.3	61608.6	59770.5	64088	54784.2	68338.8	67735.5	66115.5	58520.1	61181.6	61947.1	65220.7	59792.2	13005.1	1046	-3070.91	2897.56	-835.163	-3129.29	-640.871	-2079.49	-3306.82	-143.682	-62.067	283.197	-4351.94	-177.17	3051.01	1181.8	1981.33	809.065	2173.68	1902.86	2689.29	-1791.27	777.359	-102.237
125	fret	0.43904	0.508903	0.452352	0.544931	0.503406	0.469032	0.481761	0.470085	0.48283	0.518887	0.440057	0.464831	0.474312	0.423914	0.501217	0.449261	0.52224	0.524483	0.521121	0.511112	0.513326	0.459609	0.492515	0.489274
126	donor	40142	41863.8	46395.7	43443.4	32853.5	42581.8	45384.9	34020.6	28980.4	43557.5	48770.8	54931.7	41302.1	39733.7	59641	69472.1	55030.2	44430.4	43191.4	42169.3	30619.2	32488.8	40467.2	50074.5	59370.7	62970.6	56001.6	45227.2	43005.6	48192.2	30260.2	35825.5	34359.9	30920.5	39839.3	64879.7	38180.8	25857.8	26803.8	18058.2	33443.4	29225.4	31967.9	18352.4	65514.6	40684	24838.5	34472.5
126	acceptor	75531.2	73703.1	68500.6	62782.3	77324.7	64653	63398.3	78577.6	78177.7	69511.4	60362	48399.4	64625.6	81114.7	51123	46559.4	60551.6	67484.3	67890.4	74296	77667.8	77601.4	62803.8	64659	65564.6	64466.1	65973.3	71719.8	71339.9	71022.7	91177.9	82237.2	75140.6	76317.6	59058.9	49731.9	70313.7	81708.5	86827.9	87320.2	86607	68411	76776.5	91763.1	58679.6	67810.1	86308.1	70188.1
126	fret	0.653245	0.638027	0.596542	0.591494	0.702092	0.602602	0.582413	0.698013	0.729668	0.614734	0.553206	0.468073	0.609678	0.671536	0.461093	0.401453	0.524084	0.602602	0.610689	0.638027	0.717403	0.705153	0.607656	0.56327	0.525087	0.506048	0.541147	0.613723	0.623843	0.595532	0.751166	0.696993	0.685781	0.711276	0.597552	0.434213	0.64817	0.759368	0.764497	0.828303	0.72149	0.701072	0.706173	0.833466	0.472064	0.624855	0.776816	0.670519
127	donor	5179.45	12424.8	6747.36	26475.5	15435	6408.51	11137.9	9993.04	11665.6	13291.4	8535.67	22047.4	8328.42	10733.2	15619.2	15971.9	16162	18324.1	13395.3	13481.5	9853.56	18002.3	19226.1	17260.2	14147.4	16675.9	12759.7	15121.8	9261.4	16150.2	15071.8	23129.8	14109.9	15735.7	10481.2	15466.6	11359.6	11070.1	14351.3	14738.2	12557.1	11555	15486.3	15649.5	20571.6	10166.7	20030.8	13853.3
127	acceptor	49670.7	49492.9	52773.8	39812.5	53070.2	58715.2	59165.1	53910.2	54675.9	50080.5	53158.2	38686.9	55625.7	55353.1	56945.3	52468.8	56748.4	47123.8	58728.6	54347.2	44788.7	44539.2	43551.1	44115.1	55605.9	46880.7	48710.4	46780.7	33377.1	53089.9	42886.3	53660.9	51122.3	54980	53508.7	46923.4	50495.4	51421.2	44311.8	47968.3	51057.6	54754.2	48730.1	51806.3	56886	53551.9	44068.9	43233.8
127	fret	0.905105	0.799766	0.886631	0.600576	0.774287	0.901217	0.841802	0.843755	0.824224	0.789972	0.861311	0.637275	0.870081	0.837898	0.785073	0.766438	0.77821	0.720235	0.814445	0.801724	0.819337	0.712355	0.693623	0.71925	0.796829	0.737948	0.792911	0.755638	0.783112	0.766438	0.739915	0.698557	0.784092	0.777229	0.835945	0.751709	0.8164	0.823247	0.755638	0.764475	0.802703	0.826176	0.758585	0.768401	0.734013	0.840826	0.687702	0.757603
128	donor	8708.53	1171.71	8902.32	10719	7869.41	5588.8	7148.66	6296.18	11745.2	7996.38	1987.92	4459.47	9633.57	6353.45	5011.24	7926.69	10332.4	8037.43	4168.3	4621.75	7809.27	4458.51	9034.06	4633.21	11964.8	3835.14	6140.57	7648.89	5110.52	7273.72	719.217	8705.67	7164.89	-384.336	7846.5	7031.24	11382.5	5361.59	5457.06	5352.05	2245.67	5752.99	3010.33	5732.94	6501.42	4523.43	3448.51	7322.41
128	acceptor	30072.8	33188.9	29249.5	37021.6	28026.1	33178.6	29732.7	34337.2	34285.7	36101.1	31602.1	27870.8	35993.6	40672	36246.6	29026.5	36152	40672.3	29796.4	29173	33088.8	39756.1	32144	32958.6	29612.8	29862.7	34872.7	32063.5	30950.4	33888.3	30153	38737.8	29750	34476.9	39385.7	31489.6	32084.3	30340.4	35421.6	34659	37185.6	27799	31143.2	29476.2	32904.9	34839.5	29714.1	29277.8
128	fret	0.775582	0.966442	0.766723	0.775582	0.780669	0.856502	0.806376	0.844475	0.745433	0.818094	0.94068	0.86188	0.788333	0.864575	0.878128	0.785774	0.778123	0.835188	0.876768	0.863227	0.808972	0.898692	0.780669	0.876768	0.71226	0.88632	0.849808	0.807673	0.857845	0.823332	0.976578	0.816787	0.806376	1.01185	0.833866	0.818094	0.737994	0.849808	0.865925	0.865925	0.943521	0.82859	0.911166	0.837835	0.835188	0.884951	0.895934	0.799906
129	donor	33423.3	18396.6	22259.3	27343.9	24318.4	22947.1	25235.5	27465.1	31741.3	25494.1	31314.3	29674.6	50924.7	80339.8	59095.2	61632.9	65340.8	67414.5	75006.4	96008.7	89149.2	89136.7	94918.3	89975	98921.8	102253	77986.3	64483.5	75161.2	93902.9	99249.9	89688.7	102248	100702	91555.4	104515	89521.9	111758	94061.6	102045	78676.3	104692	100198	96812.8	70013	69973.4	77892.3	44415.1
129	acceptor	45368.1	56637.9	53020.6	72449.6	62892.7	63224.8	53800.6	63741.5	52354	66759.7	76060.5	56042.6	-932.969	-2707.82	1891.93	412.156	10.615	-4459.32	3122.87	-5508.8	-3485.82	-3024.56	-1944.16	-20.983	-5281.63	-3034.72	-3428.12	-1638.73	-3495.82	-855.995	1789.38	-1916.06	-828.464	-2795.6	-3556.93	-4459.49	1174.12	-583.252	549.642	-1904.82	515.978	186.497	-4018.16	-17.045	-142.835	1682.28	-1429.8	-1404.19
129	fret	0.576234	0.75504	0.70392	0.725571	0.721636	0.733436	0.680256	0.698994	0.622896	0.723604	0.708842	0.653585
130	donor	25967.8	31009.8	33547.4	30494.1	4951.9	12961.3	10009.2	16307.7	6426.7	16317	6914.34	4646.07	12992.8	9417.92	17922.7	9957.38	10372.8	8845.34	7183.64	6108.97	20837.4	9310.03	-946.439	7065.55	6639.94	9730.55	8531.86	7569.33	8334.76	9315.13	7662.78	12383.7	5499.86	8635.5	10413.6	3476.26	5474.37	12113.5	16432.6	17068.9	4383.56	10160.4	4850.81	9757.74	7215.07	7763.02	1964.93	-1193.65
130	acceptor	31753	38918.3	39178.8	43829.5	45287.8	37615.7	39294.1	43988.1	42193.5	40516.7	45191.7	49390.1	44911.2	47930	39968.3	46089.9	46248.5	45723.8	42469.7	49537.4	43523	40889	42792.6	41751	38102	42494.1	43830.6	48649.5	48887.1	41623.2	50664.7	41624	41843.8	42869.8	44669.7	45618.1	45907.3	40063.7	27137.1	27091.8	35812.5	38534.4	23880.5	30933	38772.5	42381.2	52290	50879.4
130	fret	0.550257	0.556451	0.53894	0.589751	0.901297	0.744168	0.797018	0.729738	0.867244	0.713188	0.867244	0.914329	0.775524	0.835929	0.690196	0.82213	0.816401	0.838236	0.855603	0.890682	0.676066	0.814114	1.02216	0.855603	0.85212	0.814114	0.837082	0.864912	0.854441	0.817546	0.868411	0.771021	0.883629	0.832472	0.810686	0.928618	0.893037	0.767649	0.622438	0.613962	0.890682	0.791345	0.831321	0.759799	0.842856	0.845169	0.963468	1.02463
131	donor	13275.6	20684.6	13520.5	16483.5	12665.4	15304.5	12863.6	21914.4	26328.2	14850	14793.9	16257.2	14277.1	16476.2	15754.9	9323.62	15926.2	12648.8	9963.95	17262.9	10301.2	13562	13924.2	16130.6	16137.9	18658.7	10065.7	9574.77	18337	65553.3	63015.9	64795.7	72979.9	77288.9	62621.5	76234.5	62799	65659.2	68849.4	64521.8	68236.1	66171.9	62328.9	59600.4	59217.5	61929.3	5823.08	-2122.41
131	acceptor	49006.8	52630.4	49628.8	49398.3	48349.7	51463.1	51654.1	46651.1	54579.8	54264.1	50294.5	41899.5	46072.8	47444.1	47242.2	56483.8	47051.3	48506.4	51268.4	45972.1	50135.2	41945.2	56140.4	48092.2	50067.9	49767	48149.4	54109.2	44632	-8046.78	-2978.52	-6392.94	-4571.39	-1117.31	1500.48	-806.881	2352.7	-4019.41	-1351.46	-5915.3	773.265	-4572.14	358.366	974.331	-4682.7	-6356.99	-555.425	1151.69
131	fret	0.786423	0.717875	0.786423	0.749397	0.792798	0.770521	0.800236	0.680308	0.674067	0.785361	0.772639	0.71997	0.763118	0.742024	0.749397	0.858064	0.747289	0.792798	0.837645	0.727311	0.829072	0.755725	0.801301	0.748343	0.755725	0.727311	0.826931	0.849457
132	donor	-348.192	412.6	4612.5	1264.14	4890.96	2322.04	3107.07	2398.49	2601.74	1014.27	2828.61	1796.82	627.661	3180.42	-517.257	-166.074	3516.68	1699.86	2471.22	1015.52	531.319	3143.75	-193.423	3833.68	1266.63	3916.35	3974.15	2100.76	3813.79	3532.22	3144.99	4387.49	7754.5	59135.3	63355.7	61423.3	59663	71817.7	62862.2	66113	60164.6	61013.7	61456.3	58569.7	58644.3	60859.6	51226	56950.5
132	acceptor	53496.2	49225.2	56349.2	55519.8	63850	55539.8	51247.5	53808.5	53527.9	52385.1	50199.4	58412.2	53964.7	57472.7	62007.5	56979.9	45540.4	59140.4	59067.7	56807.3	52697.2	52896.6	54412.6	63428	55077.6	54916.5	49703.9	48476.7	54181.7	56902	53098.9	51812.8	52669.8	-3111.73	-1153.01	1879.01	-6354.27	-4876.14	-2177.46	66.19	-5258.39	-4055.19	-1535.57	-1081.64	54.494	-4912.1	-1868.09	1275.96
132	fret	1.00628	0.99192	0.923994	0.977517	0.928556	0.959447	0.94312	0.957636	0.954011	0.981122	0.946753	0.970298	0.988323	0.947661	1.00808	1.0027	0.928556	0.972104	0.959447	0.982023	0.990122	0.944029	1.00359	0.94312	0.977517	0.933112	0.925819	0.958542	0.934023	0.941302	0.944029	0.922169	0.871659
133	donor	11906.3	14160	18615.7	19755	10618	14668.5	16688.9	15918.6	15981.7	18443.7	22731.2	21339.6	17522.3	18252.5	13313.2	17738.3	19948.1	11977	20559.7	17358	12623.1	12130	15146.3	14255.6	18101.5	15840.2	14873	24900.8	13125.9	19391.8	15423.5	12552.4	13034.1	19215.9	17728.8	21727.7	22352.7	19449.1	18701.7	18321.4	12313.5	11810.7	11329	15377.6	17180.2	37836	26615.4	12447.3
133	acceptor	64585.7	63032.9	57092.4	69070.1	46593.7	65583.6	69968.1	71967	50781.6	67433.4	62708.9	58195.9	47525.1	67929.5	66324.2	72301.7	56274.5	58053.3	59375.2	62392.2	60995.4	64557.6	56139.7	66564.3	62652.7	68827.6	60441.1	63148.8	55481.5	52167.5	55884.4	57404.8	62831.7	66847.7	66706.3	67217.4	62514.9	64585.2	56172.9	67347.3	67296	60720.1	66246.4	52968.1	71818.3	20691	37010.8	60069.2
133	fret	0.844459	0.81609	0.754273	0.777853	0.814131	0.817069	0.807275	0.81903	0.760171	0.785704	0.733609	0.73164	0.730655	0.788648	0.832727	0.803355	0.738532	0.828814	0.742468	0.78276	0.828814	0.841527	0.787666	0.823924	0.775889	0.813152	0.802375	0.71686	0.808254	0.728685	0.783742	0.820988	0.827835	0.776871	0.789628	0.755256	0.736563	0.769014	0.750339	0.785704	0.845436	0.837616	0.854228	0.774907	0.807275	0.353633	0.582184	0.828814
134	donor	18191.4	19868.8	26054.3	16744.2	23777	28790.4	27413.7	17196.3	29233.8	23795.9	19509.6	21580.6	13470.2	21254	15647.7	17577.8	18395.9	14743.7	16788.9	15089.2	20669.7	25588.5	16825	18476.7	19523.3	17091.4	14508.2	16732.2	13939.4	14138.7	14217.8	14937.9	13483.9	13633.4	13243.3	18203.4	16357.5	13757.2	16471	16058.5	22458.8	18172.5	19348	22938.3	19841.3	20542.5	13702.2	19748.5
134	acceptor	53875.7	62893.8	73887	60190.9	57697.8	70809.4	68119.4	63753	67792.8	64107.8	72417.5	66598.4	71168.2	64026.7	70935.8	63178	66746.1	68362.7	64994.9	63419.6	74976	65031.9	68589.3	63755.7	70616.2	68823.9	67372.3	62984.1	64858.7	62279.8	63939.9	64708.8	63753.3	63450.2	71708.1	66882.2	68367.5	66973	73907.3	65950.4	56866.7	67989.6	64074.1	67281.9	67790.6	67136.1	65164	69052.8
134	fret	0.747096	0.760124	0.73952	0.781948	0.708312	0.710455	0.712599	0.787426	0.698685	0.729803	0.787426	0.755775	0.840468	0.750348	0.819373	0.781948	0.784138	0.822695	0.795097	0.808323	0.784138	0.717966	0.802812	0.775386	0.783043	0.800609	0.822695	0.789607	0.822695	0.814949	0.818267	0.812739	0.824912	0.822695	0.84381	0.78633	0.80722	0.829349	0.818267	0.803913	0.716892	0.789607	0.767746	0.746013	0.773201	0.765567	0.826021	0.777572
135	donor	3676.96	4694.51	6892.96	1096.46	5697.41	6870.71	3275.91	7671.72	-410.052	34444.9	120119	113728	105158	107798	102158	27345.9	832.712	3768.14	-1012.44	-971.196	3042.56	-646.666	1703.19	2232.32	1765.06	2640.42	-1120.44	789.84	-2736.03	2483.04	3733.4	949.934	2052.14	-107.23	-407.339	897.836	839.767	1997.87	626.49	-984.764	-710.161	-228.794	2733.22	-297.172	1021.03	849.536	1066.07	-567.976
135	acceptor	92283.9	91535.1	100795	109320	98861.2	80704.3	127143	91057.8	90264.3	59915.5	-2010.77	-4612.87	-82.08	-4558.67	-3178.07	-1930.72	-4410.2	-1958.69	633.568	173.704	-895.805	-1203.2	1278.08	-1563.7	-1409.22	-1574.58	-757.863	1131.49	344.777	-3418.23	751.162	6363.14	321.493	-2468.78	-840.234	135.075	-1847.72	-2395.24	2612.5	-417.536	1473.77	-665.677	1784.9	1134.24	-1197.39	1338.3	-3309.19	207.698
135	fret	0.961519	0.951381	0.936094	0.99002	0.945447	0.92157	0.974972	0.922427	1.00497
136	donor	12154.4	18001.4	15748.1	9440.75	16740.4	12119.6	11587.7	9316.96	15365.2	8019.13	8684.48	13140.8	12413.6	16376.7	14075.1	15802.3	13090.6	7903.07	5645.88	11908.8	12183.4	9169.96	10088.7	12752.1	18382.5	12262.7	18129.1	14210.4	13939.7	10920.4	14446.4	14051.8	14053.8	14049.9	13162.1	13090.6	14216.2	13694	12817.8	10552.9	14616.6	13748.2	13827.5	16239.4	15374.8	14032.5	18038.2	15245.2
136	acceptor	44531.5	49497.8	46812.6	46181.6	57841	42972.5	46976.6	47089.7	40798.1	43955	43335.6	52215	50800.1	44932.6	45167.3	40016.1	44156.2	47854.1	56484.5	51193.4	44308.5	43532.4	48539.1	51150.9	50254.5	48259.5	43867.6	39304.2	47323.3	46058.3	41729.2	49302.5	47906	43896.5	45098	48888.4	50331.3	50409.2	41956.4	45204.5	49469.1	47425.6	42020.5	44910.8	57291	48673.2	48318.5	39414.4
136	fret	0.785211	0.733256	0.748042	0.830202	0.775625	0.779883	0.802291	0.834509	0.726933	0.845294	0.833432	0.799082	0.80337	0.733256	0.762875	0.716414	0.771371	0.858268	0.909424	0.810868	0.784145	0.825898	0.82805	0.800152	0.732202	0.796944	0.708016	0.734311	0.772435	0.808724	0.742756	0.777754	0.773498	0.757572	0.774562	0.788411	0.779883	0.786277	0.766059	0.810868	0.772435	0.775625	0.752275	0.734311	0.788411	0.77669	0.727987	0.720619
137	donor	21008.9	21584.7	23869.2	22555.9	19255.1	25165.9	17526.2	16793.6	24520.1	18826.2	22968.1	29693.3	26919.8	24862.2	20726.9	19216.7	29926.9	18205.4	27168.4	20840.4	20453.2	18842.9	30330.7	30672.8	20895.5	42401	56669	55228.9	58451.3	62474.7	76615.9	77952.6	72393.9	73091.4	92779.6	80323.9	73627.1	86031.1	87533	88475.9	76959.7	74671.8	83185.9	78176.2	71360.9	65435.1	76006.8	69395.1
137	acceptor	54213.7	43293.5	56703	44971.4	53437.6	41129.1	51433.1	48020.5	40434.5	45358.2	47190.5	40024.3	47461.5	50482.2	60499.1	44213.5	40665.6	50735.8	38214	59987.8	60002	48847.2	41210.4	48471.2	52242.7	25271.5	3667.62	-4409.27	953.245	1820.12	-3148.35	-3284.65	1793.96	1816.93	-9233.69	-1030.36	-5355.11	827.671	-896.615	508.4	-1911.38	-2101.38	-2878.76	-3354.69	-2046.94	-4146.67	566.582	-1020.94
137	fret	0.720862	0.667651	0.704137	0.665676	0.735603	0.620167	0.745421	0.740513	0.622149	0.707088	0.672588	0.574499	0.637994	0.669626	0.74444	0.697243	0.576488	0.735603	0.584439	0.742477	0.745421	0.721845	0.576488	0.612236	0.713977
138	donor	9381.15	3520.04	7689.74	5953.58	6340.78	10240.9	5649.65	7392.06	7769.89	4578.6	12146.7	4483.88	6834.15	3089.13	6879.95	7948.92	6722.78	4915.84	3048.53	6829.99	8748.3	5548.69	6964.26	5059.48	3415.96	2896.57	10351.2	9167.77	6936.16	5815.15	5461.25	10616.7	3707.4	9501.89	6869.54	8315.3	694.098	6144.06	11512.8	11256.8	10168	5540.36	8026.98	11757.4	7130.8	3850	4806.55	10342.9
138	acceptor	59633.9	71843.9	48272.2	62532.2	70948.3	55263.1	41207.7	56873.8	52453.7	64153.1	48167	55349.1	57739.1	50823.8	61309	57098.1	55801.7	59738.5	58508.3	49600.3	54572.8	68642	56139.8	47160.5	49114.2	39887.7	42780.4	48364.4	58199.4	59900.2	54746.7	60483.4	47328.5	63668.5	61583.4	62032.8	55147.3	53014	52818	36286.1	46617.4	48632.1	46879.3	50311.5	54681.5	62030.8	60151.6	52334.3
138	fret	0.864133	0.953055	0.862281	0.91294	0.917516	0.843716	0.879846	0.885379	0.87061	0.933043	0.798845	0.92483	0.894585	0.94306	0.899181	0.878001	0.892745	0.923916	0.950331	0.878923	0.862281	0.92483	0.889984	0.902854	0.934866	0.932131	0.805416	0.840925	0.893665	0.911107	0.909275	0.850223	0.927569	0.869685	0.900099	0.881691	0.98741	0.896424	0.821336	0.763001	0.821336	0.897343	0.853936	0.811042	0.884457	0.94124	0.925743	0.835337
139	donor	13902.2	18266.3	20711	15746.9	23309.3	15403.3	17277	20325.8	19340.7	13856.5	14630.9	15676.3	17970.4	27965	20031	18934.8	18975.3	16809.9	17228.2	17865.6	21834.2	15905.7	16935.5	20964.2	21918.2	22809.9	13837.8	15839.3	18617.1	13381.1	22498.5	19113.4	17699.5	23500.3	17425.4	10860.6	17013.3	16378	18886	18214.4	21644.2	20404.7	13086.3	17688.1	19173.6	19732	24000.6	18199.8
139	acceptor	62307.3	55963.5	57753.4	68111.1	50935.7	57674.3	58121.2	52426.9	58578.7	58078	56289	58171.5	65999.8	60123.4	53784.5	59428.7	69252.2	60760.1	68292.9	54839.8	58894.5	56535.5	64189.8	57192.9	54515	52291.3	53671	54844.2	60210.3	65678.6	62706.3	58332.6	52708.6	59895.1	62593.2	59060	57343.6	56612.7	60873.4	51079.9	58690.7	57403.8	55169.3	61827.5	53593.1	48895	55225.4	58796.5
139	fret	0.817356	0.754214	0.736447	0.812068	0.685534	0.788858	0.770986	0.720814	0.752121	0.807841	0.794125	0.787805	0.7857	0.682432	0.729147	0.758403	0.784648	0.783596	0.798342	0.754214	0.729147	0.780441	0.790964	0.732274	0.713533	0.695889	0.795179	0.776237	0.763642	0.831126	0.736447	0.753168	0.748983	0.717693	0.782544	0.844928	0.770986	0.775186	0.763642	0.737491	0.730189	0.737491	0.807841	0.777288	0.736447	0.712494	0.696925	0.763642
140	donor	18562.9	14454.1	11073.2	17272.5	28183.6	20396.2	20937.6	17881.6	22692.7	14033	17418.3	20011.2	21426.4	15445.2	16558.1	25721.7	19092.2	21394.8	21220.3	18985.5	23297.3	20435.3	21396.3	14930.8	15645.2	17281.5	11786.1	18370.4	18401.9	15609.1	18680.2	21641.4	15943	21533.2	17058.9	13428.4	14675.1	22743.8	18502.7	21677.5	24544.1	21313.6	24312.5	25924.7	24885.5	25050.9	17168.7	14293.1
140	acceptor	69828.8	70777.9	70434.3	68437.4	66440.1	70720.9	79302.9	65581.2	66727.4	69584.6	78932.4	69371.7	63975.8	81535.7	84161.4	66584.9	70856.2	83282.4	79043.5	73356.8	76291.1	68330.2	81788	74530	61460.2	74400.5	70111.8	68812.9	73542.1	76082.5	82542.6	72665	71702.9	77436	79868.4	80652.6	72389.7	65059.8	85197.1	71027.1	77010.8	77216.9	82797.4	83389.6	75734.6	72505	58638.8	78782.3
140	fret	0.790056	0.830355	0.864518	0.798508	0.702002	0.776337	0.791113	0.785831	0.745854	0.832484	0.819721	0.776337	0.748999	0.841008	0.835679	0.721796	0.787943	0.795342	0.787943	0.794284	0.765806	0.770016	0.79217	0.833548	0.797458	0.811229	0.855957	0.789	0.799566	0.82929	0.815474	0.770016	0.817597	0.782664	0.823972	0.857027	0.831419	0.740615	0.821846	0.765806	0.758447	0.78372	0.773175	0.762651	0.753196	0.74271	0.773175	0.846342
141	donor	17390.8	20301	11531.4	19348.1	17531.4	12636.2	27221.3	19109.5	22820.8	16048.6	17276.5	19300.4	20275.9	16199.3	17813.9	17213.7	8592.23	27247.7	19826.4	17773.7	18229.4	17395.8	23210	14283.4	21823.9	24265.9	18344.9	15822.6	11741	13881.6	15202.4	19609.2	19903	18130.3	18616.1	22539.6	17790	21433.5	19930.6	15105.8	24945.1	29087	25418.4	18417.8	19392	25638.1	23030.5	17176.1
141	acceptor	74478.2	81241.3	70723.2	67789.5	66442.9	75886.8	66133.5	78748.9	68709.6	81412.4	66438.7	74225.5	61941.4	72539.3	72189.8	80956.5	67814.5	74159.3	79704.5	75965.7	75215	85123.3	78121	75627.6	78292.4	67813.2	76046.9	64500.8	59367.2	72898.2	70546.7	78849.6	73891.6	72752.8	77915.7	52854.1	74926.3	68858.6	66327.8	72939.8	70937.9	67143	72353.3	83194.3	66507.8	58675.9	75524.5	77176.6
141	fret	0.810811	0.799992	0.859845	0.77822	0.790942	0.857194	0.708088	0.804505	0.750754	0.834996	0.79366	0.79366	0.753513	0.817103	0.801798	0.824274	0.887961	0.731372	0.800895	0.810811	0.804505	0.830534	0.770923	0.841244	0.781861	0.736915	0.805407	0.802701	0.834996	0.840355	0.822483	0.800895	0.788221	0.800895	0.80721	0.700599	0.808111	0.76269	0.769096	0.828747	0.739688	0.697785	0.739688	0.818897	0.774574	0.695907	0.766352	0.818
142	donor	22897	19475.6	21672.4	23466	23859.8	21892.8	15240.2	19937.2	20428.9	24939.3	20238.6	18348.9	17022.5	21983.2	21459.5	23522.5	30798.7	30216.5	22309.2	20014.4	19692.2	22247	17911.8	19797.8	22789.6	17052.7	22853.7	15698.1	19731.8	20255.6	12114.6	22878.2	18166.2	28801.6	24720.8	20280.1	23094.8	21156.2	14997.2	26748	23298.3	20511.8	20210.4	18708.8	24754.7	17940.1	26766.9	13143.3
142	acceptor	81026.1	83344.6	78666.9	87870.8	82367	90539.8	86675.1	83919.6	91339.3	77861	75548.4	86779.4	94078.1	83622.4	89224.9	89594.5	82769.9	87734.2	96268.9	89797.5	87875.5	88242.3	87077.1	74990.8	89904.8	83542.7	87219.1	83739.4	81729.2	88040	86983	80273.2	78602.1	91463.5	71777.1	86341.6	91212.8	77558.7	80397.1	92772.8	96577.1	88197	78458.9	86532.1	76571	85283.5	83429.1	83764.5
142	fret	0.779839	0.81079	0.783603	0.789242	0.77513	0.805179	0.85079	0.807986	0.817327	0.757189	0.788302	0.825717	0.847085	0.792059	0.806115	0.792059	0.72871	0.743922	0.811725	0.817327	0.817327	0.798624	0.82945	0.79112	0.797687	0.830381	0.792059	0.842449	0.805179	0.812659	0.877558	0.777956	0.812659	0.760972	0.743922	0.809856	0.797687	0.785483	0.842449	0.776072	0.805179	0.811725	0.794873	0.821991	0.755296	0.826649	0.757189	0.864656
143	donor	42361.9	34059.3	38166.1	38843	36813.9	56010.9	47639.4	43714	38814.4	49702.1	47770.4	34638.7	33503.3	33310.1	35465.1	48778.2	33960.2	39667.7	43522.5	42078	46287.3	41107.2	44639.5	41402.8	47130.5	42825.5	38031.7	37138.1	45030.9	44438	39187.3	44782.3	45156.9	47379.1	40954.3	42835.6	50872.8	53889.5	40228.7	51727.7	38394.5	36417.5	47731.8	50780.4	40106.1	41696.7	44424.5	43924
143	acceptor	38890.4	34342	25800.6	27712.8	33505.2	39422.8	28949.6	32726.9	36870.9	33218.1	32388.7	33037.6	26647.8	34965.9	33572	30422.1	32092.9	29178.6	27678.2	22173.8	19113.2	34874.5	34721.8	40966.4	31580.3	48068.5	37581.4	35861.8	30645.5	29690.2	27162.2	32417.1	34143.1	34807.5	34954	43134.3	31871.4	29345.3	31298.4	35652.5	43404.6	42346.3	38681.4	36128.5	34724.5	37594.2	32525.1	36063.1
143	fret	0.478971	0.5021	0.403009	0.416655	0.476969	0.412749	0.377859	0.428409	0.486992	0.401066	0.403981	0.487997	0.443178	0.51222	0.485988	0.383641	0.485988	0.423505	0.388469	0.345341	0.292676	0.459025	0.43726	0.497054	0.401066	0.528495	0.497054	0.491012	0.404954	0.400095	0.409823	0.419588	0.430373	0.423505	0.460018	0.5021	0.385571	0.352955	0.43726	0.407874	0.530536	0.537694	0.448119	0.415678	0.463997	0.47397	0.422525	0.451089
144	donor	20906.1	16934.4	18642	18263.2	19653.6	19034	40110.9	19329.2	18672.8	16999	18941.5	18595	20174.9	23336	20458.2	29397	20684.4	18461.4	17903.5	22773.7	19081	18486.4	26410.6	21293.7	21143.9	24698.6	20828.2	22588.7	16880.1	19760.8	15445.6	16022.6	19928.2	17018.1	17771.3	20025.1	20327.6	22174.6	19128	15256.2	19085.4	17357.3	18945.9	21759.1	19870.9	21101.3	19333.6	21493.4
144	acceptor	58936	64817.5	65311.5	57497.9	67446.5	66717.8	43656.6	53625.5	64961.3	59565.8	63760.4	57713.5	55903.9	64914.6	68736.5	63336.3	58932.7	62055.7	67839.7	71242.3	64573.5	66350.9	65044.6	70421	70925.2	62861.9	71148.1	58335.1	60682	62555.7	67046.7	64824.9	57554.4	63588.8	70625	64613.1	69164.9	62563	63070.7	58184.2	57817	67758.5	54299.6	59002.2	68387.5	57488.7	67824.7	65052.6
144	fret	0.738004	0.79262	0.777864	0.758948	0.774707	0.777864	0.52164	0.734869	0.776812	0.777864	0.770501	0.755802	0.734869	0.735914	0.770501	0.682871	0.740095	0.770501	0.791565	0.757899	0.771552	0.782076	0.710891	0.767348	0.770501	0.718178	0.773655	0.721304	0.782076	0.759997	0.812707	0.802119	0.743233	0.7884	0.798949	0.763146	0.772604	0.738004	0.767348	0.79262	0.751609	0.795787	0.741141	0.730691	0.774707	0.731735	0.777864	0.751609
145	donor	19144.1	17611.2	17973.1	21915.8	13151.7	19666.7	20948	18201.5	18383.4	15071.7	19612.5	17369.2	11965.2	19225.4	20324.8	17688.6	12307.8	20994.5	17086.6	15052.4	17347.9	23243.6	15017.5	13916.2	14365.2	14307.2	15755	18489.9	20651.9	22564.2	18625.4	19306.7	17315	14854.9	20473.8	14928.5	17851.2	15294.3	21079.6	17448.6	18927.3	14796.9	14469.8	18205.4	14702	22707.4	14568.5	16651.1
145	acceptor	58753.9	62515	54500.8	55529.1	57174.3	57116.5	54137.4	57603.4	61671.8	59474.7	54005.7	61084.5	56799.3	67069.1	65857.5	53478.2	54322.5	60866.2	52347.2	55163.9	60752.3	55767.2	57027.6	56428.2	54037.6	61511.1	50693.1	56910	50861.9	52783.3	58298.8	59715.7	56033.6	61104.3	60163.9	52209.1	57328	55170.4	63817	60229.1	53850.2	65674.5	59561.9	60612.5	61599.8	56701.8	59172.4	64096.8
145	fret	0.754771	0.779873	0.7525	0.716478	0.81343	0.743442	0.72095	0.760456	0.770726	0.798336	0.733293	0.778726	0.826279	0.777578	0.763874	0.751366	0.815761	0.743442	0.753635	0.785641	0.777578	0.705337	0.791403	0.801811	0.790249	0.811102	0.762734	0.754771	0.7109	0.700895	0.75818	0.755907	0.763874	0.80413	0.745703	0.777578	0.762734	0.78334	0.751366	0.775285	0.740054	0.815761	0.80413	0.769582	0.807613	0.714245	0.80297	0.793712
146	donor	13638.4	16753	13127.8	15563.9	12312	13301.4	18102.1	11881.9	17815.1	20450.9	17841.2	9141.74	16973.2	15945.2	17407.7	17208	16397.9	15424.3	9537.74	16031.4	15348.3	14961.4	16389.9	11508.6	15993.9	15357.4	19295.8	21452.8	22207.3	19593.1	9108.84	16215.2	14410	11497.3	15896.4	13405.8	17446.3	8627.74	16336.6	11951.2	10240.1	7948.08	11388.4	11603.9	21584.4	8193.17	17192.1	17105.9
146	acceptor	60044.4	61451.4	67383.9	61083.9	52862.1	63338.1	56262.2	67595.7	58663.3	58804	49137	71794.1	68485.4	64428.7	65648.4	64511.3	61612.7	61541.3	62663.2	67138.9	54145.1	56221.6	59287	60308.1	69337	70361.8	57730.2	71979.8	66462.9	60655.9	64312.9	53820.8	60868.5	55410.5	61677.8	49281.6	55029.8	72061.7	75222.9	69613.4	65195.5	69843.6	60215.8	67151	66489	65118.7	61263.3	63100.8
146	fret	0.815059	0.785295	0.837021	0.796712	0.811609	0.826594	0.75704	0.850991	0.767181	0.742464	0.733536	0.88744	0.801286	0.801286	0.789866	0.789866	0.789866	0.800142	0.867387	0.807015	0.779615	0.789866	0.783021	0.839344	0.812758	0.82082	0.749181	0.770571	0.749181	0.755916	0.875625	0.76831	0.808163	0.827751	0.795569	0.78645	0.75929	0.893368	0.821974	0.853327	0.863865	0.89812	0.840506	0.852159	0.754792	0.888624	0.78075	0.78645
147	donor	28834.7	32729.2	36073.8	34405.5	31799.4	34400.2	28178.5	26924.6	31063.5	34331.1	33826.4	37848.4	26518.2	29065.8	30346.3	37322.4	28329.9	32814.2	34822.6	34251.4	35794.9	36759.2	30407.4	32322.8	31764.9	30495	31796.8	28369.8	38669.3	37277.2	38159.2	30667.7	36554.7	36347.4	33566	36283.7	36182.7	27126.5	39713.3	33579.3	40717.5	40388.1	30561.4	31037	25322.7	38031.7	32174	40563.4
147	acceptor	60310.2	71311.2	69708.1	67343.9	66548.1	74531	68278.4	65561	69418.9	60714.5	68574.8	62139.6	67171.2	72119.4	65728.2	72285.5	65325.6	73246.3	62953.1	67144.2	65088.1	65869.1	62899.6	66041.5	72071.7	63896.4	66048.9	66669	70718.1	62417.5	60914.5	64299.8	66339	66320.5	64117.9	66957	70800.6	66974.5	63261.6	62397.1	67863	69629.2	65230.7	61968.9	71261.9	62321.2	61979.1	53049.6
147	fret	0.676308	0.685092	0.659208	0.662042	0.676308	0.683569	0.707321	0.708825	0.69096	0.638269	0.669174	0.621915	0.716387	0.713354	0.683569	0.659208	0.696871	0.69096	0.643798	0.662042	0.645187	0.642412	0.673483	0.672044	0.69391	0.676308	0.674864	0.701333	0.646577	0.625972	0.615203	0.676308	0.645187	0.646577	0.656383	0.647971	0.662042	0.711842	0.613867	0.650765	0.624617	0.632779	0.680657	0.666313	0.73794	0.620568	0.657794	0.567294
148	donor	18118.8	15856	16181	12023.4	18664	17395.5	15665.7	17983.3	17946.2	16984.4	15623.5	13658.7	17729.7	11982.5	14670.2	15231.5	14656.3	18702.4	14524.6	15874.6	19484.4	25982.3	13651.9	19762	14655.4	16540.9	15964.9	18871.2	16829.6	18898.2	17800.6	17841.5	22789.5	15230.2	16636.3	18135.2	18301.5	18648.8	15138.6	15485.1	17057.4	16623.2	66231	75720.1	72014.1	70608.8	73819	73713.1
148	acceptor	44210	42772.7	49873.7	47766.5	43575.8	60015	67222.5	68432.2	57931.3	47478.1	46969	51734.9	48533.3	59680.9	63643	52652.5	49044.2	53229.6	67225.1	59967.1	43574.7	36769.8	45224.5	51579.7	52622.2	39590.9	64958.6	68018.6	68609.9	61292.4	63705.4	73456	68476.6	52575.6	59417	47022.6	59718.8	61974	51679.2	63879.4	61952	70077	8849.65	-2597.36	603.006	-329.444	-420.689	107.096
148	fret	0.709177	0.729732	0.754731	0.798656	0.699789	0.774948	0.811339	0.792293	0.763939	0.736226	0.750116	0.791382	0.732522	0.832948	0.812243	0.775864	0.770366	0.739936	0.822165	0.790472	0.691314	0.585662	0.768531	0.723211	0.782264	0.705425	0.802285	0.783177	0.803192	0.763939	0.781351	0.805004	0.750116	0.774948	0.781351	0.721334	0.765777	0.768531	0.773116	0.805004	0.78409	0.808626
149	donor	10363.5	4342.71	6965.61	10966.5	12830.2	11641.4	14971	8378.98	12372.5	12293.2	14032.4	11955.1	7769.94	8803.72	13169.5	14541.4	11580.4	12143.1	13539.3	9240.66	13154.9	12218.7	8861.08	7898.09	13895.7	8162.94	8400.95	8381.42	11569.4	10414.8	9534.81	11156.9	8641.39	8555.95	12400.6	14221.6	10989.7	13110.9	11269.2	16073.2	11394.9	11845.3	17229	13325.8	13674.8	4430.58	11194.7	10383.1
149	acceptor	47569.6	50267.1	47270.4	38248.6	40681.7	34804.2	39513.6	38169.1	35327	39465.6	47545.9	49565.2	34273.3	42940.7	49726.7	41236.7	41355.9	48169.9	43715.4	39604.8	48612.6	39844.9	43465.4	33779.2	37295.9	45281.8	42775.1	48159.2	46591.1	49150.6	34845.7	41843.1	42851.8	41267.2	39392.4	34395	46958.8	46042.4	44798.2	46980.2	45144.6	39956.7	45992.3	52520.2	42722.4	35112	52806.7	44655.5
149	fret	0.821554	0.920293	0.87132	0.777185	0.760727	0.749428	0.72482	0.819486	0.740192	0.762783	0.772039	0.80605	0.815351	0.829831	0.790578	0.739167	0.781304	0.798829	0.763811	0.811214	0.787486	0.764839	0.830866	0.810181	0.728917	0.847442	0.836043	0.851591	0.800893	0.824657	0.785425	0.789547	0.831901	0.827761	0.760727	0.707427	0.810181	0.778215	0.798829	0.745322	0.798829	0.77101	0.727892	0.797797	0.757644	0.887964	0.824657	0.811214
150	donor	28800	15116.9	10594.3	17759.1	31503.2	25901.7	13542	27192.2	13509.1	25229.4	32434.1	17498.1	14806.7	16543.8	26094.4	19214.1	27201.6	32241.3	24343.2	22681.3	31667.8	33395.5	26851.3	22166.5	26545.7	29206.7	21849.2	24716.9	23722.6	16745.9	30031.7	15862.1	18967.3	21353.2	18633.5	17660.3	15307.3	21729.3	23501.7	21174.5	28978.6	25565.5	18983.7	18429	17963.6	25165.9	24517.1	20133.2
150	acceptor	72404.1	108872	101233	75567.9	69502.9	93393.6	94399.8	80371.4	65283.4	101739	70192	86632	86444.6	87808.3	92844.8	69720.7	60487.7	88073.9	78799.3	70719.2	73641	66833.8	74824.3	76040.2	86934.7	79105.7	82409.3	76047.3	94125.9	88202.4	76846.4	91729.1	82302.3	74411.1	73755	84497.4	94771.7	113810	60961	58349.1	90696.1	82090.2	87593.5	73831.7	77464	69145.2	64734.5	76470.4
150	fret	0.715176	0.878524	0.904809	0.809868	0.688023	0.782644	0.874482	0.747384	0.829038	0.800791	0.684003	0.832066	0.853268	0.841151	0.780628	0.783652	0.690033	0.732283	0.763499	0.757455	0.699083	0.666919	0.73631	0.774582	0.766521	0.73027	0.790709	0.754433	0.798775	0.840142	0.719201	0.852258	0.812893	0.776597	0.798775	0.82702	0.861348	0.840142	0.722219	0.73329	0.757455	0.762491	0.821975	0.799783	0.811885	0.73329	0.725238	0.791717
151	donor	18342.8	13608.9	12005	14295	12530	12543.7	11830.9	12226	12352.3	15704	14328.9	17409.8	10999	12864.4	15039.6	13571.4	14079.8	13383.6	12371.1	15160.9	14283.4	14373.7	10055.8	16755.5	12537.9	14084.1	13341	12488.1	10719.5	16739.6	12735.1	12714.1	11774.6	15634.7	13738.9	16975	13864.6	16083.1	12098.8	14006.1	17027	14159.2	16770.6	15989.2	14842.4	8897.41	11251	17364.3
151	acceptor	68352.7	68183.2	64940	69222.7	62808.8	65664.9	68134.1	70830.3	60888	67466.7	64979.8	68093.4	70226.1	71243.4	59115.8	68177.2	68924.8	66114.5	64705.5	68181.9	69482.6	62808.1	69361.6	59978.5	57601.5	68131.8	72673.3	61532.9	64255.5	68112.4	66308.5	65830.9	63614.9	58071.4	61844.8	65001.2	69421.3	67445.1	76358.8	68913.5	50460.4	69342.8	73844.2	67619.3	64834.4	55376.8	67977.3	63552.3
151	fret	0.788604	0.833797	0.843861	0.828742	0.833797	0.839675	0.852222	0.853054	0.831271	0.810927	0.819434	0.796365	0.864632	0.847202	0.797225	0.833797	0.830428	0.831271	0.839675	0.817736	0.829585	0.813483	0.873689	0.781675	0.82113	0.828742	0.844697	0.831271	0.857185	0.802376	0.838836	0.837997	0.843861	0.787739	0.818585	0.79292	0.833797	0.807512	0.86298	0.831271	0.747504	0.830428	0.815186	0.808366	0.813483	0.861326	0.858014	0.785143
152	donor	10281.5	7213.18	8328.62	5684.93	12523	6462.07	7336.2	11684.4	10783	12750.1	10802	11220.7	13802.9	12338.5	11348.5	8773.37	12136.2	11588.6	4424.01	10189.3	5092.32	3054.26	10984.1	7264.05	13187.8	14827.2	10482.6	12177.6	6884.35	13498.9	13534.4	9500.83	15542.9	13607.7	12802.2	17602.2	4141.3	9986.98	17407	11313	15035.4	6212.49	18057.6	13980.3	13591.2	13410.2	7998.6	12035.7
152	acceptor	50542	49099.4	50230.8	50602	58009.1	48624.1	45455.1	47335.1	45264.4	54330.4	58311.1	50300.3	53023	48603	47371.4	44834.7	55532.9	47570.5	54131.9	57044.9	50556	52615.9	54013.8	50765.4	48703.4	46625.9	50128.5	49026.7	52945.2	53833	47843.6	48489.3	46471.2	48117.5	47358.6	48324.9	51036.3	46097.1	52023	44461.6	48702	46310.7	49682.5	52182.4	49136.4	54920.7	53676	47921.4
152	fret	0.830526	0.872385	0.85732	0.899395	0.82198	0.883172	0.860544	0.801733	0.808124	0.810253	0.84337	0.817713	0.793243	0.797482	0.80706	0.835873	0.820913	0.80386	0.924367	0.848731	0.908067	0.945086	0.830526	0.87454	0.786878	0.758334	0.827319	0.80067	0.885332	0.799607	0.779463	0.835873	0.748854	0.779463	0.786878	0.733092	0.925455	0.82198	0.748854	0.797482	0.763608	0.882092	0.733092	0.788999	0.783699	0.80386	0.87023	0.799607
153	donor	2862.67	6368.12	4696.34	4590.55	1873.71	2604.61	3741.03	6751.2	3216.9	3741.03	4151.37	669.96	1591.6	2851.45	2207.1	2793.75	5611.57	8182.55	6754.41	4101.68	4721.98	4964.01	5486.55	6650.22	2561.33	3029.37	2965.25	1559.55	3401.23	4013.52	4952.79	2611.02	5379.15	14111.5	77382.7	77284.9	72024.4	69312.3	73939.8	73406	82205.7	72806.5	75191.6	83159.4	79836.7	82143.2	71660.5	74834.2
153	acceptor	63004.2	66629.7	64959.4	64594.3	75203.9	72825.5	74016.7	71718.5	67256.8	72522	67972.9	83383.3	64775.3	67289.9	68153.8	68334.6	79479.5	72184.6	68631.4	77109.3	67981.6	61059	78731.5	72443.7	73680.3	73909.7	67008.2	70274.7	67708.8	78985.1	63707.5	67409.9	79866.6	50718.7	103.984	-205.08	-473.494	-3333.27	-3900.24	-1753.51	-567.009	-2296.34	-1338.82	-1726.62	-3793.17	-819.373	1203.06	-3555.37
153	fret	0.956743	0.912999	0.932683	0.933465	0.975869	0.965188	0.952116	0.913791	0.954431	0.95057	0.942819	0.991749	0.975869	0.959051	0.969012	0.960588	0.934247	0.897867	0.910619	0.949797	0.935028	0.92484	0.935028	0.916165	0.966719	0.960588	0.957512	0.978148	0.952116	0.951343	0.927982	0.96289	0.93659
154	donor	7793.37	12564.9	19235.3	14646.8	14266.9	17719.9	18373.5	15039.4	11718	11676.8	16499.8	22672.3	25115.9	20612.2	16232	21388.2	16150.8	13432.5	20447.3	41311.1	79790.3	79654.1	73843.3	73838.8	78959.4	77325	74050.5	86179.1	71650.4	81731.5	75095.5	76543.3	88974.1	77396	77117.8	80891.4	83835.1	77616.9	93830.3	79140.2	68261.4	71468.4	81486.5	78344.8	78484.4	79552.3	74159.2	76729.8
154	acceptor	57440.4	63021.9	65543.3	63827.1	67566.3	64950.9	61137.8	53725.9	60910.5	64656	59666.7	59648.4	48114.7	56382.8	68074.2	51270.5	57045.9	67855	66189.5	29123.6	1455.69	-4886.37	59.832	-3294.43	-2805.36	2868.84	1337.13	2836.7	1981.35	1601.26	-4106.73	-1564.19	-560.273	-2665.39	-2286.83	-2361.74	-2643.46	1105.74	2850.59	1339.81	-2194.26	-1566.78	366.762	-4151.93	-5723.97	-2272.88	-2574.49	-1279.95
154	fret	0.880394	0.833638	0.773319	0.813785	0.825904	0.785301	0.768972	0.780939	0.839172	0.846935	0.78312	0.724717	0.65672	0.732234	0.807191	0.705462	0.77985	0.834744	0.763545
155	donor	6650.97	8040.18	3392.54	8173.83	5581.77	3991.14	10735.8	5404.82	6579.44	6378.02	7253.33	5451.88	2543.58	1355.79	11003.1	1254.14	5399.17	8123	4237.74	3556.31	5717.3	2616.99	6782.74	13749.5	5960.13	1214.61	1120.49	2519.11	6048.6	6682.97	10165.4	6558.73	6989.8	7744.64	9024.67	5210.93	6088.13	6620.85	5252.35	4512.57	4232.09	4158.67	4817.51	6923.92	6541.79	7993.12	9790.8	7731.46
155	acceptor	95754.1	105654	106709	102797	99192.6	101755	93778	111685	105897	110339	107719	107884	107062	92628.4	112305	101194	110517	98448	106974	97064.6	111142	106415	110759	97578.1	98060.9	103991	106387	108776	100309	108596	109201	104384	106010	102585	113264	102252	111973	102776	107459	106810	101693	103839	104596	112970	110185	96646.7	92972.5	104397
155	fret	0.935405	0.929078	0.969229	0.925917	0.947017	0.961819	0.897515	0.953357	0.941737	0.944904	0.93646	0.9523	0.976646	0.985131	0.911178	0.987254	0.953357	0.92381	0.961819	0.964994	0.951243	0.975586	0.942793	0.876539	0.942793	0.988315	0.989377	0.977706	0.942793	0.941737	0.914334	0.940681	0.93857	0.930133	0.925917	0.951243	0.948073	0.939626	0.953357	0.959702	0.959702	0.961819	0.955472	0.941737	0.943848	0.92381	0.904869	0.931187
156	donor	23538.3	22125.3	23617.6	23128.8	26409.2	22335	24479.4	24445.7	23231.2	23123.9	22780.3	24628.8	24518	18511.8	24948.5	19841.3	22693.3	23792.2	27079.6	23105.6	21346.9	25499.7	24921.9	71879.7	90746.8	98588.2	95832.3	102212	95323.9	100302	92457.9	94049	89845	48299.5	707.021	-299.975	-681.454	2995.2	942.641	1163.53	-1858.15	5641.02	-1691.25	2099.7	2145.99	-509.648	-773.319	-1219.31
156	acceptor	74354.7	72391.7	78500.6	72470.5	66163.1	78486.8	75789.1	79917.9	80054.6	68570.3	66383	73733.2	72156.2	70686.1	77129.4	76641.4	75301.5	68429.2	75395.1	74138	69149.2	80530.3	76750.8	25740.1	-990.771	-2859.44	-465.97	969.195	-2312.12	-2789.51	-6941.56	533.942	-3008.58	-3934.93	1144.11	-1299.51	-5755.72	-2205.82	2788.78	2598.88	-1428.02	-2808.05	-1402.84	-3479.86	494.389	-3476.06	-1640.26	1165.79
156	fret	0.75983	0.765868	0.768887	0.757817	0.714573	0.778953	0.755805	0.765868	0.774926	0.747757	0.744739	0.749769	0.746751	0.792042	0.755805	0.794056	0.768887	0.741721	0.735687	0.762849	0.763855	0.75983	0.754799
157	donor	38037.6	34702.6	23320.8	19660.2	29797.5	31172.8	33431.3	37112.8	43293.6	31502.9	26471.4	30185.6	37683.7	34290.7	27219.3	30026.5	31238.2	38923.7	26339.1	22688.9	26694.4	27087	25817.2	33743.6	32943.7	31016.7	27840.8	26733.1	30335.7	34198.5	21315	26965	22772.1	24053.8	29259.2	21657	23050.2	29167.1	37613.8	26982.9	33731.7	33887.8	34552.4	33560.7	33297.5	34038	36898.7	42227.5
157	acceptor	71505.6	72389.6	64454.3	70994.5	53913.1	72268.2	64883.2	59909.6	64230.3	72323.7	78015.9	79836.4	62424.5	59062.1	66624.4	59320.7	67289.7	48792.6	67690.7	75885.8	75073	73429.9	68417.2	63638.7	75232.2	67215.7	73518.2	68359.5	74651.3	74425.3	75881.5	67814.3	66726.8	63648.1	72745.6	71214.2	69261	77315.1	59987.3	72536.6	74962.7	71660.3	68367.2	69836.6	70629.6	44940.2	69576.2	67525.9
157	fret	0.652484	0.675514	0.734741	0.782976	0.644143	0.698677	0.659789	0.617154	0.597547	0.696566	0.746478	0.725163	0.623366	0.632702	0.71031	0.663974	0.68287	0.556584	0.719852	0.770056	0.737939	0.730481	0.726226	0.653528	0.695511	0.683921	0.725163	0.718791	0.711369	0.684974	0.780819	0.715608	0.74541	0.726226	0.713488	0.766833	0.750755	0.726226	0.615085	0.728353	0.689185	0.678665	0.663974	0.675514	0.679716	0.568828	0.653528	0.615085
158	donor	14236.4	2027.89	5240.83	5740.59	10300.4	-45.9503	5292.76	876.501	1255.64	108.722	-327.377	3389.23	24.9641	555.43	3301.56	6435.78	16376.1	1056.86	93914.5	92887.1	89490.5	97883	95098.3	94825.3	92599	93675.6	95605.3	89243.7	90411.2	66779.8	87962.7	91495.1	85769.9	84127.7	84018.9	105798	101014	91615.1	91327.5	96401.6	101960	106454	95170.9	110104	96441.2	102631	131047	92520.8
158	acceptor	89622.7	87461.4	90480.4	94324.6	98042.6	86607.5	92639	95972.1	90646.2	86762.2	82443.3	83021.4	61118.7	92047.9	91944.4	83046.3	92978.1	85566.4	7546.35	-16.823	362.283	2254.45	4378.85	-471.227	-4094.13	-4310.53	313.526	-1766.03	-3549.96	3641.35	-1906.88	-1301.95	-2917.14	446.159	749.315	-4306.41	-6141.26	-1744.64	-202.836	705.951	-1117.53	-2385.53	-1612.4	-1120.76	-1202.61	2672.12	-5533.8	-2867.64
158	fret	0.862777	0.977711	0.944828	0.942217	0.904527	1.00087	0.945699	0.990591	0.986304	0.999146	1.00428	0.96045	1	0.994016	0.965639	0.928249	0.850227	0.98802
159	donor	14723.2	18482.5	17059.7	16308.4	12682	14332.1	13669.4	17605.8	12439.9	17115.7	17880.3	14268.6	13236.9	14456.1	16414.7	13061.3	29633.3	17971.8	19046.3	15952.7	12488.6	14199.3	15242.8	17225	20810.1	15660.5	17120.2	15135	16919.4	11021.5	18687.6	21518.5	16008.8	15061.2	59708.7	57360.5	69122.4	57732.4	62889.4	58116.2	59111	51697.3	57273.4	64163.2	63664.3	54661	58076.3	66189.6
159	acceptor	47561.4	44780.9	47927.5	45443.5	54130.1	45928.2	44150.7	46992.2	55386.4	44793.1	43244.8	44182	44413.3	46380.1	46936	43109.7	39216.8	43960.8	46551	45060.8	47515.6	47900.7	49399.5	51259.3	44525.4	49214.1	46012.4	51944.1	44580.1	47980.7	47870.4	41694.6	48397.1	47917.5	-1651.6	-2101.5	-4746.89	-1672.76	-3193.87	-120.867	1483.72	2615.43	908.792	-5323.13	-2380.01	2582.78	1855.23	-1776.84
159	fret	0.763829	0.708158	0.736976	0.735945	0.810517	0.76176	0.763829	0.727702	0.816762	0.723583	0.70713	0.755557	0.770039	0.762795	0.741102	0.767968	0.569634	0.710213	0.709185	0.739039	0.791809	0.771074	0.763829	0.748326	0.681485	0.758658	0.728732	0.774181	0.724613	0.813639	0.719467	0.660014	0.751424
160	donor	346.059	6501.44	5154.65	2294.48	5023.52	5709.57	10021.2	6595.99	6254.93	10842.9	5084.3	3660.41	5783.3	5997.17	711.319	9467.41	9576.59	32401.1	4379.11	29943.9	27344.3	42024.4	33353.9	34636	37498.4	32249.1	28117	35349.6	35958.5	22953.9	41791.4	33881.2	32593	65783.2	33162.5	31797.7	2925.39	2349.64	12910.1	15252.5	2092.44	2913.57	131.631	1523.44	15843.4	4706.09	9797.21	10061.2
160	acceptor	88106	79638.5	78512.5	80755.9	77325.3	78295.5	80447.4	82242.7	80924.2	78305.5	75538	102312	75461.4	75386.4	81324.4	71699.4	70531.6	42208	77286.8	52821.2	53007.5	36189.1	44578.6	36786	43141.7	40965.8	44258.8	46565.7	50545.4	48367.3	49731.8	42424.3	31379.6	24188	38918.3	47112.9	70582.6	69273.9	56444.4	57883.3	67269.9	62777.7	60395.1	51714.1	65433.2	76876.8	82996	80826.7
160	fret	0.996502	0.924906	0.938276	0.9728	0.939165	0.932043	0.889002	0.925799	0.928476	0.878159	0.936496	0.965746	0.928476	0.926691	0.991249	0.883584	0.880873	0.565337	0.946273	0.638623	0.659845	0.462258	0.572239	0.514655	0.534613	0.55941	0.611434	0.568296	0.584042	0.678074	0.543559	0.556443	0.490563	0.268622	0.539586	0.596793	0.960446	0.967511	0.814237	0.791126	0.970156	0.956023	0.998252	0.971038	0.805011	0.942721	0.894411	0.889002
161	donor	16217.3	19381.7	22758	16656.7	12742.9	26147.1	13045.8	20909.1	26188.3	15019.8	26259.4	19112.9	20257.7	21106.8	17649.4	12860.9	22691.1	14559	11283.7	29163.5	21048.5	15068.2	27684.5	24703.5	13112.6	21890.4	20331.7	24178.7	30696.7	27629	27784	15110.8	18170	19451.4	24019.5	24490.2	34735.7	19257.9	18987.7	20210.8	26899.4	21253.3	20680.1	16453.4	18192.7	19277.9	23204.5	17035.1
161	acceptor	64115.4	70768.5	69703.7	75228	72146.9	74060.7	85867.2	83946.4	79824.1	80843.8	82559.1	70412.1	76786.8	72896.7	71783.6	56356.8	72780.6	72574.6	74626.2	77979.5	72858.2	72301.9	76191.2	77037.8	77130.6	75266.8	63175.7	75155.2	73545.6	73810.9	78541.2	71535.8	74331.9	72903.4	70443.7	65285.5	75781.7	70978	72986.1	68208.3	68381.2	72849.8	70144.5	76437.7	72040.9	66192.1	73339	85734.2
161	fret	0.797707	0.785494	0.754137	0.818668	0.849955	0.738669	0.867721	0.80016	0.752942	0.843653	0.758924	0.786712	0.79159	0.775785	0.802617	0.813714	0.762497	0.832366	0.868997	0.728042	0.775785	0.827373	0.733938	0.757726	0.855013	0.774575	0.756529	0.756529	0.705822	0.728042	0.738669	0.826127	0.803846	0.789149	0.745791	0.726865	0.686185	0.786712	0.794034	0.770951	0.717481	0.774575	0.772158	0.822393	0.798933	0.774575	0.760096	0.833617
162	donor	5078.98	5060.95	9030.68	5981.63	11906.4	5246.75	5121.96	5309.15	8426.14	6496.05	5253.69	10224.5	3245.94	6878.74	8387.32	6299.15	7718.99	5865.16	6123.06	8892.03	5277.26	3763.13	8485.76	9754.47	959.501	4901.5	6888.44	8930.85	4043.22	8352.65	4815.53	5637.76	10558.7	6504.36	5410.37	6382.35	7698.19	8480.22	7011.85	7921.43	7705.13	5435.32	6817.73	5905.37	3876.83	7728.7	5069.27	5891.5
162	acceptor	21773.6	22817.3	34566.4	23449.9	21600.9	24446.1	25578.3	25798.5	23963	23651.1	22618.6	27168.9	20551.4	25949.5	25522.8	25954	29476.8	20353.8	23097	28239.2	21060.3	18515.2	26264	20637.9	18695.6	25749.9	24289	24665.3	33334.8	21364.6	21810	26966.8	30149.4	26220.2	28820.5	23931.5	23307.1	26892.1	21467.6	27649.5	31633.7	24403.3	22678.5	28922.1	29295.4	24571.1	23549.6	18946.6
162	fret	0.810873	0.818193	0.792796	0.796927	0.644616	0.823049	0.833505	0.829494	0.73954	0.784491	0.811688	0.726523	0.863595	0.79031	0.752425	0.80433	0.792796	0.776132	0.79031	0.760968	0.7994	0.8311	0.755839	0.679447	0.950947	0.839896	0.778645	0.734349	0.892139	0.718649	0.819003	0.827081	0.740403	0.801045	0.842283	0.789481	0.75157	0.760119	0.754133	0.77697	0.80433	0.818193	0.768586	0.830297	0.882947	0.760968	0.823049	0.762665
163	donor	570.67	1699.43	3696.79	1017.26	8596.97	12921.5	16244.3	15388	16885.5	20634.4	11821.4	13882.3	12255.7	11823.5	10469.4	16858.9	17221.5	16152.1	15326.5	18563.3	14996.7	13445.9	12499.5	18577.6	19470.8	12999.4	16678.6	12845.7	12536.4	9840.46	14988.5	13968.3	12485.2	11635	15615.4	21050.2	15719.9	9746.22	15371.6	8301.98	16676.5	4614.55	-2407.95	2410.29	3239.96	-7.02756	3620.99	-2188.76
163	acceptor	64134.9	63047.3	58752.4	65344	49296.1	39422.3	35160.1	45566.4	41848.2	34112.2	42210.4	41536.6	39230	36166.3	41128.7	39314	40507.9	39415.1	43198.7	44410.3	49130.8	44635	43570.7	47669.6	38304.2	43798.8	48936.9	48330.4	51001.6	50977.2	48348.1	50377.1	51694.3	45573.3	48295.8	58351.8	50313.2	44587.7	51742.2	52130.2	50925.6	47527.4	59856.2	40389.1	56323.7	55257.6	48450.8	48335.2
163	fret	0.991393	0.974157	0.940566	0.984693	0.851772	0.753454	0.683809	0.747585	0.712308	0.62263	0.780799	0.749542	0.762251	0.753454	0.797368	0.699545	0.70151	0.709364	0.737797	0.705439	0.766158	0.768111	0.776896	0.719177	0.663125	0.77104	0.745628	0.789574	0.802236	0.838196	0.763228	0.782749	0.805156	0.796394	0.755409	0.734859	0.762251	0.82072	0.77104	0.862426	0.753454	0.911691	1.04198	0.943449	0.945371	1	0.929987	1.0477
164	donor	15736.3	11841.5	14660.7	21258.9	17647.9	9437.41	15713.1	15093.2	15574.1	19565.4	17225	17284.9	11843.4	14359.5	31479.5	81912.8	75411.2	82113.6	77913.8	71114.8	70707.3	66874.4	77357.6	83252.9	84201	83517.5	73907	85124	87742.4	79503	79456.6	79018.3	77015.9	78581.9	84459.8	91303.2	81569.1	74758.5	84583.4	83795.5	91038.6	75787.8	80387.3	74609.9	75911.3	71008.6	84436.6	84620
164	acceptor	59386.1	65266.2	66866.1	60854.7	59424.3	61522.8	58744.6	51662.7	54537.2	58939.3	57713.9	54740.4	58382.9	61886	48813.4	-618.316	-788.889	2189.86	-2327.61	-2561.42	-2768.8	-2469.54	-5433.51	-549.171	-217.247	-5609.61	-4306.17	-4643.64	-646.644	-1768.85	924.692	1502.86	-1077.46	-3965.19	554.443	2128.64	-3583.23	-42.996	-2835.36	122.199	1499.62	-2318.24	-495.806	-722.276	951.523	-1284.85	-2941.94	1484.25
164	fret	0.790812	0.846363	0.820612	0.740635	0.771329	0.867006	0.788759	0.774403	0.777478	0.750857	0.770305	0.760065	0.830905	0.811351	0.607556
165	donor	14518.2	19951.2	25081.1	20093.3	23217.4	19902.9	28205.2	21820.3	13890.7	21431.4	23823.4	23525.8	36748.8	35244.4	19774.2	30948.5	21662	20428.5	16800.3	31382.9	24113	20098.7	22592.6	21519.9	23147.7	23852.9	16840.5	20562.6	25040.9	19259.3	17977.5	15821.5	23547.2	16827.1	20028.9	22530.9	27172.8	15550.6	16317.6	18747.1	20833.4	19170.8	17870.2	20908.5	29149.1	22437	16159.4	30959.2
165	acceptor	77987.2	74922.2	88357.9	83724.6	71917.7	88439.3	74101.1	81480.1	72360.4	83308	72845	87602.8	77446.2	81877.9	76894	75636.3	92712.8	80716	94651.1	86101.3	92811.6	86096	87790.2	86186.2	82742.4	78417.2	88212.9	86563.2	87155.7	82199.5	89180.3	91923	81665	90263.5	79317.4	83267.7	77772.4	85032.7	89388.2	91816.4	71360.3	97322.1	82275.6	83745.8	79958.9	80797.1	72188.4	82464.3
165	fret	0.842967	0.789718	0.778855	0.806495	0.756125	0.81636	0.724463	0.788731	0.839027	0.795641	0.753159	0.788731	0.677877	0.698705	0.795641	0.709605	0.810441	0.797615	0.848876	0.732383	0.793667	0.810441	0.795641	0.800575	0.781818	0.766999	0.840012	0.808468	0.77688	0.810441	0.83213	0.852814	0.775892	0.842967	0.798602	0.786756	0.741289	0.844937	0.845922	0.83016	0.773916	0.835086	0.82129	0.800575	0.732383	0.782806	0.817346	0.727433
166	donor	1645.93	4981.45	5350.16	5657.83	5394.12	5108.42	6849.44	3484.61	-4121.65	649.663	3501.71	2463.93	740.011	2173.36	2087.89	6532	4209.83	-26.7203	2620.21	2080.57	1558.02	2766.72	3980.3	3792.28	3145.2	4224.49	3780.07	3279.5	4134.14	2612.89	7369.55	4165.88	708.267	1623.95	8392.67	-3433.06	2605.56	3552.98	2085.45	2180.68	1931.62	766.87	3018.23	3308.8	1802.2	11286.2	7904.3	-231.833
166	acceptor	80549.5	77500.8	81558.7	92969.8	79992	83735.1	98736.5	87754.7	93524.5	93411.7	98599.9	94653.2	95432.2	98535.7	89707.2	96287.2	79703.4	98121.2	88449.6	94568.2	109345	78686.9	92398.2	85800.1	100190	98283.8	105681	105491	99694.3	91785.7	91473.1	100423	107528	82506.2	81385.6	82305.2	91739.9	89475.4	88615.3	97283.4	97407.4	91728.8	89370.6	90114.2	92206.2	98942.1	87577.7	97719.1
166	fret	0.98007	0.94008	0.938171	0.942942	0.937217	0.942942	0.935307	0.962001	1.04633	0.993362	0.965808	0.974368	0.992413	0.97817	0.97722	0.936262	0.949617	1	0.971516	0.97817	0.985769	0.965808	0.959145	0.95724	0.969613	0.959145	0.965808	0.969613	0.960097	0.972466	0.925755	0.960097	0.993362	0.98102	0.90662	1.0435	0.972466	0.962001	0.97722	0.97817	0.98102	0.991464	0.967711	0.964856	0.98102	0.897996	0.917149	1.00285
167	donor	413.241	5642.98	3699.97	8293.92	3435.98	3824.75	5663.35	5664.2	-627.443	2332.48	2245.05	6305.08	1097.41	5204.97	2161.86	1663.59	5844.15	3211.03	11846.3	2728.89	6330.54	5936.68	2910.54	1560.88	6148.89	5459.63	6210.01	2414.82	647.523	4278.88	3955.47	3501.34	4681.23	3823.9	5842.45	5817.84	4353.58	4432.52	6522.38	10475.5	9001.86	4959.66	7945.89	3326.48	8529.05	7080.92	3597.26	4392.63
167	acceptor	65559.2	61123.6	59014.4	49317.6	56241.2	56096.3	55259.5	55524.8	60211	55900.9	66112.9	64389.7	61447.8	51347.7	57281.3	54201.3	58905.8	66066	53782.9	59563.3	59023.5	57825.1	52178	56089.8	59685.2	62022.4	56318.9	53468.2	57607.6	59612.6	60457.8	50930.2	59575.1	59346.2	59437.4	54942.3	52461.4	62575.8	57941.3	61736.5	57276.4	59279.2	66709.4	55222.6	63904.3	53545.9	57137.6	55907.9
167	fret	0.993882	0.91558	0.94063	0.855703	0.941828	0.93584	0.907281	0.907281	1.01102	0.959873	0.967125	0.910835	0.982904	0.908465	0.963496	0.970758	0.90965	0.953845	0.819957	0.956254	0.902551	0.907281	0.946628	0.973183	0.906098	0.919144	0.900189	0.956254	0.988997	0.933449	0.938234	0.93584	0.927479	0.939431	0.910835	0.903733	0.923904	0.933449	0.899009	0.854543	0.863842	0.922713	0.893115	0.943027	0.88254	0.883713	0.94063	0.927479
168	donor	15617.8	8047.62	12267.6	6609.04	3984.17	3779.17	6646.64	9280.01	15110.8	19701.9	14228.9	17047.9	13128.8	9968.97	9683.93	17639.8	14507.9	12846.1	9198.74	2623.21	8347.23	10092.7	6074.12	4738.63	7484.81	5528.28	10414.1	9552.92	10176.4	11676.8	15222.4	13447.8	10420.2	16361.3	9275.15	10261.3	17520.9	13774.1	10918.7	6997.19	8974.34	9133.24	6556.88	4243.74	9341.87	9036.2	6537.47	15266
168	acceptor	56159.2	57083.7	52047.5	57745.4	52980.2	54279.1	51936.5	57046.9	50879.2	50819.5	58127	52810.3	31237.7	52187.2	56096.6	53030.7	51086.9	52852.2	59150.8	50592.8	51824.9	59296	58645.8	64947.3	60840.4	64042.7	54806.5	61052.5	64831.6	50155.7	54386.7	51122.7	60541.3	50132.4	58458.9	58127	53699	49163.3	47394.1	58530.6	60922	54059.8	68228	70390.3	56752.1	54522.2	58678.2	57941.1
168	fret	0.782881	0.87621	0.809743	0.897077	0.930561	0.934755	0.886638	0.86059	0.770507	0.720152	0.80354	0.756092	0.703768	0.839805	0.85227	0.749921	0.778755	0.80457	0.865794	0.950498	0.861631	0.85435	0.906482	0.931609	0.890812	0.920084	0.840843	0.864753	0.864753	0.810777	0.780818	0.792172	0.85331	0.754035	0.862671	0.850192	0.754035	0.780818	0.812852	0.8929	0.872042	0.85539	0.912758	0.943148	0.85851	0.85747	0.900211	0.791139
169	donor	6249.38	15294.8	17253.4	15432.4	10326.2	17616.3	10338.7	5664.29	14399.9	11299.3	11111.5	10604.7	11634.1	15398	13965	11243	12378.7	13270.4	11136.6	14062	11843.7	19615.6	16364.8	19036.8	9124.75	15617	12904.4	11436.9	14931.8	15745.3	9087.21	24815.7	15951.8	12510.1	10948.8	11796.8	23708.1	12907.5	12848	16743.4	7563.48	15069.5	24005.4	20432.3	10642.2	9878.79	13273.6	6643.61
169	acceptor	46378.3	44206	37459	41722.7	40765.9	41356.6	36634.7	38186.1	44853.7	38649.4	37316.2	44218	40569	42333.4	46482.3	38346.4	45262.9	48051.9	37304.9	40588.6	33403.4	41150.7	30828.8	37791.1	38602.2	36555.6	46400.8	39264.5	43777.2	42279.2	47310.3	41413.2	49571.8	46600.8	44720.5	41547.3	38923.4	45281.5	44786.3	41060.2	43811.3	43831.7	42399	43536.3	41745.3	43850.2	47100.5	45546.9
169	fret	0.881496	0.742746	0.684092	0.730067	0.797596	0.701292	0.780382	0.870189	0.756916	0.773821	0.771206	0.80696	0.777754	0.733868	0.768596	0.773821	0.785655	0.783016	0.769901	0.742746	0.737645	0.676791	0.65276	0.664718	0.808303	0.700056	0.783016	0.773821	0.745304	0.728802	0.8382	0.625687	0.756916	0.788299	0.802939	0.779068	0.621038	0.777754	0.776442	0.709981	0.853404	0.744024	0.638561	0.680436	0.796264	0.81639	0.780382	0.873007
170	donor	11093.5	5500.75	2136.38	5043.12	7280.67	7965.96	5178.8	1848.93	11206.1	5167.3	7248.47	8057.95	3364.39	12493.9	6818.44	12367.5	7650.91	9555.01	7816.48	5475.46	8855.92	10732.4	8602.96	13719.7	9791.87	12132.9	10994.6	8168.33	1469.49	6100.96	14425.6	6767.85	6374.61	9695.29	3019.44	7414.05	6496.49	6471.2	6926.52	6662.07	7749.79	10396.7	7924.57	7692.3	8862.82	9377.94	8566.17	4672.88
170	acceptor	39306	37892.5	32105	27941.6	19539	18024.4	26534.1	25344.6	28743.4	26889.6	24793.2	18903.5	22656.3	33816.3	25491.1	28364.7	26038.6	31664.9	30332.9	31970.2	34009.3	22831.9	26484.9	24530.1	32538.4	29607.6	31667.7	26349.8	28600.6	23585.2	26569	37852.9	25734.6	24757.3	31074.8	32228.6	34983.6	32720.6	33287.7	35069.3	30805.9	24605.8	32502.1	35659.6	34311.3	25322.1	29141.8	34367
170	fret	0.78038	0.872894	0.937472	0.847044	0.728591	0.69371	0.837098	0.931514	0.719623	0.839087	0.773411	0.700687	0.870906	0.730584	0.789339	0.696701	0.772415	0.768432	0.795311	0.854004	0.79332	0.679751	0.754491	0.640851	0.768432	0.709658	0.742539	0.763454	0.951373	0.794315	0.647835	0.848038	0.801282	0.718627	0.911649	0.813223	0.843066	0.835109	0.828146	0.840082	0.799292	0.702681	0.804268	0.822177	0.794315	0.729588	0.772415	0.879852
171	donor	9917.5	6451.44	11167.9	9826.96	8640.21	9490.51	5911.9	7309.09	38435.1	44696.7	51608	40217.6	53367.4	51584.8	61625.7	54212.8	59766	62312.1	51127.2	58957.3	68619	63197.8	62144.4	52389.8	64034.7	56073.7	54373	59433.3	56345.3	57742.4	46591.9	54250.7	53621.8	51827	57924.7	59596	52305.4	54537	65658.2	52989.3	53882.4	54067.2	52756.9	55000.7	55229.5	64031	53780.9	62193.4
171	acceptor	53699.8	46343.2	46050.4	39481.1	48576.8	45507.8	40102.3	32270.6	19956.2	-5430.22	-2277.21	2439.88	-4101.09	5534.65	-3268.95	1858.36	-5300.26	-4437.16	-3061.87	-3805.16	-2997.83	4912.82	1703.99	-4752.24	-2598.66	-472.544	1422.73	-3885.5	-3320.32	-6835.99	-2680.06	1334.57	-4750.2	2586.06	89.121	-561.428	-397.129	-3784.94	-1034.6	-4245.36	-1618.19	301.679	3726.51	-3544.22	-3114.37	-1279.97	-1471.95	834.819
171	fret	0.844062	0.877524	0.804719	0.800955	0.848724	0.827241	0.871963
172	donor	12915.8	13870.3	9184.15	13384.7	8502.35	16537.6	6739.65	17608.5	13015.5	16391.3	8375.97	39279.8	11701.8	7295.07	13112	13521.1	24599.5	14638.5	18775.9	11934.6	12599.8	13168.5	21456.5	5339.47	8159.79	13690.7	6749.63	10654.2	18124	8967.97	15496.6	14528.8	16328.1	16005.5	11050	20255.9	11798.3	20116.2	9234.04	8326.08	8306.13	15539.9	13820.4	10491.2	6220.82	14335.9	9263.97	16683.9
172	acceptor	42884.7	45213.3	43980.7	50385.8	33768.1	48408.6	38266.2	48019.2	50496.4	39341.4	54979.7	34528.3	39917	39097.1	48004.7	53819.2	47723.1	38108.1	45068.9	43728.8	42244.9	49756.6	48993.1	46719.1	50829.3	49393.1	39497.2	50441.4	42396.1	52684.8	54531.1	45729.1	44203.6	48882.5	50635.8	44108.2	45304.5	52765.8	52493.3	54962.2	48707.7	45255	54780	52816.2	48285.6	51257.9	42023	49843.4
172	fret	0.768773	0.765404	0.826721	0.790211	0.799291	0.745281	0.849801	0.731953	0.794747	0.705501	0.867244	0.468113	0.773271	0.842856	0.785666	0.799291	0.659858	0.722002	0.705501	0.785666	0.769897	0.790211	0.695652	0.897754	0.861417	0.783405	0.854441	0.825573	0.700025	0.854441	0.778906	0.758679	0.729738	0.753088	0.820983	0.684752	0.793613	0.72421	0.85096	0.868411	0.854441	0.744168	0.798155	0.834776	0.885978	0.781146	0.819837	0.74974
[truncated: 1,162 more columns]

## Sheet: 389-389_dCC1_inter_liposome
1	donor	57705.3	63789.4	63932.3	64243.6	64886.8	62729.6	78609.1	71124.8	61497.7	67200.3	77993.7	72045.3	60978.1	61617.6	79593.8	76105.4	82844.8	84641.1	88104.1	83841.7	89035.5	89532.1	88586.1	87637.7	76908.5	79274	73725.3	88830.8	84262	82315.5	86375.6	101211	108644	103967	117960	100166	82657.1	57453.4	48491.3	98190.1	89084	98667.4	83461.3	83541.3	80401.7	85281.8	86739	82050.2
1	acceptor	3449.4	14219.8	-33.259	5337.37	5095.15	-2358.82	6424.76	7068.15	9034.46	10250.2	18872.3	13815	17422.2	13798.9	-2039.56	-988.858	-2770.58	-4788.22	-2108.28	-1001.99	607.169	-4150.27	-4686.72	-2064.11	1464.33	-994.218	-4586.77	-387.032	-206.138	-198.996	7417.65	-4100.76	3510.75	5988.33	3260.47	4122.23	2685.7	-947.317	1619.51	-3605.61	-923.872	-4267.29	1789.98	-4307.41	2249	-2296.8	-4265.52	-4361.83
1	fret	0.0567053	0.182423	0	0.0769257	0.0726735	-0.0387715	0.0758634	0.0907281	0.127757	0.131977	0.194978	0.160396
2	donor	10988	15919.6	15402.6	16185.1	15617.3	9323.57	12954.8	19242.7	12562	14590.6	11347	14875.9	14066.9	11491.9	12501	13644	14325	19666.3	11758.8	11338.1	10915.2	16903	14180.1	10301.1	15793.1	16930.2	16341.8	15804.2	15204.7	16697.8	13741.8	15170.1	15506.3	14742.8	13559.4	12058.9	12567.2	13802.1	14347.1	14122	12766.5	17643.7	17368.6	14211	20273.1	19970.1	16077.8	14864.9
2	acceptor	37885.5	36344.8	45581.3	49965.3	39485.2	54917.9	44489.3	38328.2	48142	44160.9	37724.9	44780.9	51097.8	40445.1	44487.7	48966	40592	44934.5	46961.1	45721.7	49856.5	44661.2	46364	48874.2	38492.3	47571.5	39889.5	46315.8	30906.5	42327.7	41916	43724.4	39615.8	50474.7	47353.7	48334.5	42339.9	43744.6	38404.4	45906.5	45314.1	37488.7	42025.1	39546.7	35615	41411.4	42852.4	37163.9
2	fret	0.775041	0.695025	0.747376	0.755703	0.716639	0.854696	0.774123	0.665638	0.793338	0.752005	0.768609	0.75108	0.784204	0.778709	0.780542	0.782373	0.739026	0.695968	0.799715	0.801534	0.820569	0.725066	0.765848	0.825984	0.709139	0.737167	0.709139	0.745523	0.670397	0.717576	0.75293	0.74274	0.718512	0.774123	0.777793	0.800625	0.771367	0.760319	0.727866	0.764928	0.780542	0.679894	0.707261	0.735306	0.636918	0.6742	0.726933	0.713829
3	donor	7150.41	3866.68	6882.3	7881.02	6158.39	8343.52	5077.89	6708.69	7311.95	8584.82	5862.12	6471.41	7234.2	6784.43	8464.84	7901.13	3435.02	3517.46	5075.88	3899.52	5207.92	5483.41	6195.92	5270.26	6994.23	6415.78	10544.1	9393.86	9036.59	3176.96	4325.16	6693.28	4693.81	9436.75	11471.1	8346.2	6346.74	9631.14	8295.26	5025.6	7834.1	5710.64	6807.89	5925.8	4990.75	7423.89	8216.83	10145.2
3	acceptor	26604	27415.6	23511.2	23210.9	22900.4	28468	23558.2	28453.2	24890.5	23900.5	27569.8	24285.7	25785.3	27964.4	24376.6	29635.3	23625.6	26082.7	20864.1	24366.2	26023.3	23750.3	25833	21488.3	17390	24485.9	23403.8	20593.8	20414.8	24097.7	24232.6	27900.7	21894.2	21277.6	25548.2	25538.2	20561.2	23379.3	23040.9	29255.2	28203.7	21416.9	26634.5	23648.1	31940.5	26468.1	21365.3	17658.1
3	fret	0.788252	0.876324	0.773921	0.746116	0.788252	0.772965	0.822502	0.809206	0.772965	0.735535	0.824399	0.789206	0.780613	0.80445	0.742271	0.789206	0.873504	0.881022	0.80445	0.862209	0.832928	0.812058	0.806353	0.803499	0.713354	0.792067	0.689138	0.687197	0.693018	0.883838	0.849003	0.806353	0.823451	0.693018	0.690108	0.7538	0.764348	0.70852	0.735535	0.853723	0.782524	0.789206	0.796833	0.799691	0.865034	0.780613	0.72204	0.635523
4	donor	38480.6	43050.1	28313.5	28036.1	24180.3	28284.4	32411.7	25229.6	34269.8	27706.4	21230.3	32413.7	29046.6	26891.8	23385.1	33410.6	37107.4	29413.2	25371.2	30373.3	25491.4	29731.3	32448.6	37538	29580	34194.2	24203.6	41025.3	35420	39027.5	47584.8	29632.4	33486.3	47602.3	26715.3	21224.4	21104.2	23643.1	29087.4	32087.8	29669.2	28540.4	29438.4	36927	28100.1	42218.1	32702.7	30745.7
4	acceptor	19027.5	26673.9	12192.5	27295.5	36615.2	4851.78	30993.3	16408.9	41270.3	9754.19	14153.8	13038.7	16174.1	13101.6	30683.4	37511.1	14516.9	21740.7	20403.5	1148.91	5017.14	-1508.62	17627.7	12675.8	4184.29	23913.8	25411.3	29827	28615	17069.6	32544.1	22969.7	25650.7	12659.4	21205.1	10507.4	46386.4	26165.6	8881.63	27568.9	17833.7	37641.5	-8970.96	26318.4	36080.2	12904.1	32061.6	19712
4	fret	0.331059	0.382242	0.301366	0.492978	0.602396	0.145934	0.488428	0.39391	0.546578	0.260101	0.40032	0.286854	0.357047	0.328275	0.567381	0.528417	0.28098	0.42546	0.446218	0.0371484	0.164588	-0.0531641	0.351643	0.252521	0.123395	0.411731	0.512052	0.420495	0.447422	0.304239	0.40668	0.436518	0.434074	0.210427	0.442629	0.331059	0.687668	0.525165	0.234059	0.461729	0.375687	0.568406	-0.439468	0.416751	0.562236	0.234059	0.495243	0.390039
5	donor	34870.6	25039	28378.1	19142.2	24920.6	31178	27609.4	24326.7	26891.6	33016.1	25503.5	26370.6	26438	17349.7	29647.8	21215.3	26798.7	36031	20816.3	26204.8	31631.6	32276.5	30034	35132.9	22619.8	22461.3	19639.5	26079.1	30265.4	28121.2	26851.5	22301	24018.8	17967.2	27252.3	23958.7	23984.2	25153.7	17316.9	31161.6	37328	26343.3	21627	29208.8	30983.1	24609	30910.2	33759.3
5	acceptor	64427.4	47537.6	51891.3	41350.5	53335.5	40196.9	44815.1	50626.2	53669.5	52255.9	62876.3	55657.1	42362.9	37993.4	40062.1	53390.3	64052.1	53298.9	49906.4	47988.6	39698.4	52303.8	41739.1	50727.1	51364.3	32702.3	62235.9	59657.2	59667.9	48591.8	55230.1	60466.1	51069.5	46828	40271.8	53021	40176.7	50336.7	58778.1	51573.5	56055.3	53135.2	51223.1	50436.5	54364.3	70923.4	35141.1	47226.6
5	fret	0.648464	0.654543	0.646438	0.683968	0.681936	0.563675	0.619123	0.675846	0.665697	0.613062	0.711434	0.678889	0.616092	0.686	0.574744	0.715508	0.705326	0.596913	0.705326	0.646438	0.556634	0.618113	0.581793	0.590863	0.694135	0.592879	0.760414	0.696169	0.663668	0.633279	0.6728	0.730798	0.679905	0.722641	0.595904	0.689049	0.626199	0.666711	0.77269	0.623166	0.599939	0.668741	0.70329	0.633279	0.637326	0.742023	0.531532	0.5828
6	donor	16451.3	15868.3	19627.5	19829.5	18809	19216	20153.9	21162.1	13468.5	12243.8	17992.7	19121.9	22330.3	19710.9	19593.1	19199.9	21159.1	19765.2	21887.3	16891.9	22386.1	19932.8	21068	18549.6	17702.8	18169.4	23758.5	20103.4	20128.6	20983.9	19057.6	28065.5	19701.7	22037.3	22015.9	22400.7	20429.3	20749	19147.1	25249.5	18483.1	21152.2	19170.1	20645.7	19455.4	16439.8	22076.3	21889.6
6	acceptor	61083.5	60701.2	64477.7	56880.6	66482.5	56750.5	61096.4	64287.1	60877.7	64650.8	64175.2	55354.5	67760.1	56836.7	57546.9	62108.5	61626.7	69474	67674.1	64862.4	67287.8	62785.8	57637.3	65301.8	68063.9	67049.5	55678.8	54756.3	59049.9	67466.1	65159.1	63048.8	63267.6	65729.4	68394.7	62674.6	65013	65101.9	59241.4	60267.8	60558.7	63711	51493.5	68185.8	67165.8	63453.4	63399.6	69197.9
6	fret	0.787733	0.793115	0.766233	0.741646	0.77912	0.746978	0.752318	0.752318	0.819109	0.840887	0.781271	0.743778	0.752318	0.742712	0.745911	0.764089	0.744844	0.778044	0.755525	0.793115	0.750181	0.758734	0.732064	0.77912	0.793115	0.786656	0.701343	0.731001	0.745911	0.763017	0.773745	0.691856	0.763017	0.749113	0.756594	0.73632	0.760875	0.758734	0.755525	0.704511	0.766233	0.751249	0.728876	0.767305	0.775894	0.794195	0.741646	0.759805
7	donor	161338	159480	166589	159634	168884	172077	185048	178965	170756	176444	173552	174220	170028	172787	177229	171453	175485	191452	167677	161084	161800	177060	179341	165347	189071	175454	182761	173216	169323	169881	177327	184399	178550	195777	174283	172648	166542	190626	187840	176845	179336	183230	169155	177550	165388	157501	178441	183897
7	acceptor	9308.18	16884.9	16462.1	16824.2	9424.24	-4565.39	1608.67	-4602.46	-3792.95	441.956	-6127.5	-2705	-2840.59	801.567	-1340.79	-3263.18	-3297.96	-5442.95	236.074	-1986.28	-355.197	455.251	3344.54	-5160.85	-5013.59	1261.61	-2573.88	-1840.49	-466.245	-1050.74	-1182.9	-5194.51	-3491.05	2978.03	-2745	-3235.89	-5724.79	-3906.06	-3196.57	219.581	-1020.06	18.908	-3561.55	-3640.55	1415.83	-2208.02	220.815	246.783
7	fret	0.0543309	0.0953749	0.0902475
8	donor	66038.5	66008.8	64792.5	67656	64593.5	66368.4	67778.5	68196.2	68371.6	66665.3	74851.5	72681.2	62878.8	57993.9	65131.5	63334.9	69961.6	73290.9	65066.6	67871.7	62959.7	72186.7	61865.6	66495.6	66133.5	61918.9	69236.6	69646.6	65316.4	62548.2	68882.8	72007.6	75302.9	73674.8	69553.1	72825.5	72720.7	77244.1	71334.4	67041.2	75376.1	68491.2	65955.1	70147.9	70283.9	68294.4	69968.5	72488.3
8	acceptor	7222.65	5466.42	10181.1	3743.39	11361.2	8118.81	1505.83	6595.05	9271.95	5230.19	7977.48	8453.77	8756.18	5905.18	10647.3	4828.45	11099.7	3789.51	7147.31	5498.31	7510.4	11317	5034.32	-235.935	3553.18	3950.03	2681.22	12306.3	4585.43	10272.3	7817.96	4018.88	6838.14	4393.15	995.383	7566.19	2173.44	8250.4	-1533.93	2180.81	1186.7	493.675	5641.03	8242.99	5237.95	8331.83	5046.28	1344.95
8	fret	0.0978977	0.076936	0.135226	0.0519219	0.1501	0.108217	0.0225696	0.0874712	0.120124	0.0733999	0.0961675	0.104789	0.121813	0.0927059	0.140209	0.0716272	0.136889	0.0482981	0.099625	0.0751695	0.106505	0.135226	0.0751695	-0.00380915	0.0501115	0.0591314	0.0373497	0.1501	0.0662905	0.141864	0.101349	0.053729	0.0839716	0.0555329	0.0132246	0.0944342	0.0281368	0.0961675	-0.0211219	0.0318317	0.0151003	0.00757725	0.0787063	0.104789	0.0698514
9	donor	6412.3	7334.92	2757.06	39438.7	80699.8	57981.6	59872.1	57704.8	59152.5	74634	69334.8	58208.1	60408.9	61058.1	64176.6	68393.8	50744.9	55027.5	51357.2	59439.3	49317.4	56606.1	56117.9	62130	60454.2	64954.9	62224	76021.3	69261	68247.8	71148.2	78368.1	72911.2	66545.2	63510.6	77312.9	58721.4	63232.1	64384.6	63485.4	60187.5	68370.3	73535.2	63064.4	70958.6	75405.6	71139.8	66639.1
9	acceptor	100063	120986	102023	75713.3	24367.6	30320.9	27287.9	37640.8	32343.1	12362.1	23756.7	35324.5	35718.2	33888.3	27002.4	20592.3	35333.3	32920.2	33646.8	28244.6	32914.4	30625.4	26066.9	21195.9	28831.3	22181.6	25612.3	13948.8	20755.4	27305.8	25382.9	19900.7	21751.5	22258.9	24967.6	24442.5	21639.3	21713.4	21499.7	29038.7	29346.3	15912	17305.5	17148.9	14711.4	21103.5	28423.4	22340.4
9	fret	0.939803	0.943378	0.973353	0.657215	0.232171	0.343461	0.313287	0.395229	0.35392	0.142307	0.254942	0.377853	0.371129	0.35678	0.296475	0.231265	0.410776	0.374008	0.396198	0.321736	0.400077	0.351063	0.317038	0.254027	0.322677	0.254942	0.291825	0.155442	0.230359	0.28533	0.263192	0.202438	0.229453	0.250371	0.282552	0.240344	0.269629	0.255858	0.250371	0.314224	0.327385	0.189044	0.190825	0.214108	0.1713	0.218611	0.28533	0.251285
10	donor	-630.395	-5402	442.894	-25.8623	4370.74	2589.47	1212.3	-2906.28	4645.53	-3501.12	4079.79	-25.8623	-3559.31	-6265.16	-775.872	5692.95	3753.28	235.994	2954.78	-1580.84	-7306.12	-3514.05	-239.227	10432.2	4102.42	7855.69	3132.58	5738.21	2625.03	-1635.8	1629.33	-245.692	4771.61	931.045	-517.247	4218.8	1351.31	3834.1	8925.75	-3536.68	843.76	1167.04	4099.19	-2977.41	1894.42	6585.2	-753.241	-1493.55
10	acceptor	47781.4	34858.3	44187.5	48967.3	45910.4	48698.7	54807.5	49472.1	42129.9	46848.1	50699.7	48763.5	52423.3	52493	39597.3	50479.2	40379.8	47709.7	44731.2	40316.9	39971.3	43797.8	44283.6	33930	36943.1	43811.7	47476.1	45250.9	41227.7	43176.8	45817	44707.4	48340.1	46334.8	54654.7	48017.9	39629.1	43493.9	44612.5	43676.1	43613.5	48021.4	40956.9	40402.9	42701.2	44533.9	52462.3	44892.8
10	fret	1.01348	1.18236	0.990409	1	0.913212	0.949241	0.979017	1.0615	0.900903	1.08005	0.925676	1	1.07383	1.13547	1.01945	0.899157	0.914983	0.994235	0.938297	1.04117	1.22415	1.0863	1.0057	0.764235	0.900903	0.848169	0.938297	0.887019	0.940113	1.03927	0.965883	1.0057	0.90968	0.980907	1.00959	0.918535	0.967749	0.918535	0.833381	1.08839	0.980907	0.97713	0.90968	1.08005	0.956604	0.871632	1.01553	1.03527
11	donor	26337.4	25616.2	23965.6	24599.5	24124	29099.1	32044.3	31725.5	24097.3	32243.7	28030.7	26994.4	20945.6	33424.3	30473.8	34325.3	29567.4	29886.1	23465.2	31184.2	27307.8	27770.8	26364.1	29795.3	24077.7	31734.4	31688.1	33483	23737.6	29645.8	27314.9	30947.4	23556	30876.2	27696	21410.4	33575.6	29337.7	33135.8	30842.3	24772.2	30498.7	29295	26118.3	28034.3	30541.4	32818.8	31882.2
11	acceptor	79256.6	86606.9	87284.3	81916.3	88302.5	79048.8	84026.7	88275.1	81872.2	79318.9	91801.7	79669.2	76620.5	91505.9	73762.2	82819.2	90419.8	84437.4	91154	76584.8	75794.2	87432.1	85041.3	92188.8	86158.8	84325.7	95105.4	72478.1	84968.9	76129.4	89579.8	85721.6	81840.6	80216.2	82294.1	82288.4	88502.8	87827.5	77428.9	82061.4	95185.4	83477	86855.2	88105.2	83083.4	87433.7	82053.1	92521
11	fret	0.750352	0.771598	0.785088	0.769353	0.785088	0.730382	0.723759	0.735914	0.77272	0.710564	0.76599	0.747013	0.785088	0.732594	0.707275	0.707275	0.753695	0.73813	0.79528	0.710564	0.734807	0.759277	0.76375	0.755927	0.781705	0.727069	0.750352	0.684371	0.781705	0.719353	0.76599	0.734807	0.776092	0.721556	0.748126	0.793015	0.724862	0.749239	0.700711	0.727069	0.793015	0.732594	0.748126	0.771598	0.748126	0.741458	0.713856	0.743679
12	donor	110000	119051	115674	127991	82574.3	113296	74827.5	53985.7	142269	90950.4	179565	58583.2	162777	278028	284206	288113	257806	266809	268083	283286	253598	276123	287759	283382	269076	292117	310186	310150	277040	316421	279504	290340	300591	284418	290398	334038	304752	213208	12120.2	7499.93	10952.5	7424.1	2748.23	9883.36	7815.87	24510	14576.9	-1594.02
12	acceptor	136112	182107	181940	167109	244463	189687	166008	167100	152681	159683	68039.9	251552	88135.9	-19181.3	-7987.85	-968.672	4383.97	-12683.6	-4160.86	-7322.3	2263.53	-18585.9	-17416.9	-5194.77	-38329	-23884.5	-31708.6	-2972.41	33953.8	11668.8	1582.9	-24742.4	-29549.6	-28964.9	-11256	-19028.3	-4054.21	11895.8	16272.8	2037.63	-17183.4	320.503	11823.6	14330.1	-16790.2	3848.5	20937.6	-14432.9
12	fret	0.553306	0.605044	0.611719	0.566197	0.747377	0.6259	0.689081	0.755834	0.51793	0.637128	0.274258
13	donor	13060.9	14643	16623.2	12787.4	12220.7	15695.5	15502.9	9975.65	12877.1	14240.3	16807	18347.5	12341	17842	15393.5	17028	5343.35	11052.2	12818	11774.3	20347.4	14457	11393.6	16787.3	16524.8	18071.8	14367.2	14813.6	9640.86	15529.2	25559.6	18183.4	11774.3	14163.8	17982.1	15365	16758.9	10185.7	13892.4	17264.4	14060.9	14684.5	12415.4	11759	14074	14509.5	6544.64	13605.8
13	acceptor	48390.1	48653.4	55572.7	53402.1	52581.6	51184.7	51216.7	38372.8	51530	47631.9	42508.5	46020.8	56266.1	56162.9	51868.8	55510.9	52896.1	49141.2	63097	58713.2	56002.2	53686.5	52013.2	46060.6	40154.1	65600.7	44892.3	51014	52367.9	51299.7	51065.6	50377	46100.4	55076.5	46606.5	42261.1	51988.5	57336.9	62242.5	47745.4	53790.1	48822.6	39251.8	52022.4	59977.1	42208.6	45213.5	51502.5
13	fret	0.786998	0.769034	0.769981	0.806773	0.811469	0.765243	0.768086	0.793599	0.80019	0.769981	0.716646	0.71473	0.81991	0.758602	0.770928	0.765243	0.90808	0.81616	0.831148	0.833018	0.733851	0.787941	0.81991	0.732896	0.708009	0.784166	0.757652	0.774714	0.844208	0.768086	0.666558	0.734805	0.796425	0.795483	0.721426	0.732896	0.755752	0.848866	0.817098	0.734805	0.792656	0.769034	0.759551	0.815222	0.809591	0.744338	0.87394	0.790771
14	donor	59333.4	67384.9	54974.3	77582.6	66198.5	81768.3	57040.5	41350.7	78515.7	63785.7	60399.8	64678.8	59813.3	69717.7	85860.8	54667.7	91086.2	43910.2	42430.5	45376.5	54867.7	61306.3	68598	47576	48629.1	90846.3	46616.2	38044.8	69371.1	71930.5	84447.7	57133.9	41950.6	70184.3	49122.3	56987.2	58107	70330.9	57800.4	49615.5	108202	71184	51295.2	71250.7	21221.9	55640.9	50335.4	70650.8
14	acceptor	104662	106932	89382.6	88435.4	133441	138539	105651	104322	88445.1	74774.9	99156.2	105804	84309.8	71300.3	91851.8	99535.2	82421.7	108434	96398.4	84215.8	94421.6	83067	86199.1	95430.9	106791	108223	90836.9	92195.5	118812	108270	94260.4	95556.8	101797	105585	95403.5	87078.2	91634.1	94063.7	104042	83426.5	88745	103706	72902.7	112113	100745	111682	133765	61839.8
14	fret	0.638399	0.613005	0.618732	0.532214	0.667878	0.629107	0.648934	0.716472	0.530072	0.539738	0.62103	0.62103	0.584748	0.505709	0.517301	0.645413	0.474645	0.711531	0.694382	0.65011	0.632584	0.575838	0.557111	0.667878	0.6871	0.544059	0.660742	0.707838	0.631424	0.600467	0.527934	0.625639	0.707838	0.600467	0.659556	0.603867	0.611862	0.572513	0.643071	0.626794	0.450357	0.59257	0.586986	0.611862	0.826002	0.667878	0.726409	0.466475
15	donor	8581.04	15701.8	-14174.8	24098.4	3815.54	-895.004	1334.65	4231.64	11533	15713.6	11022.7	-1405.31	17774.5	2842.03	1538.78	9103.13	-11065.9	2724.26	17319.1	2822.4	16133.6	23014.9	-325.813	11203.2	6045.2	-5793.97	3638.9	-1774.31	-1358.21	-8345.52	4773.35	4604.56	9052.1	21401.6	3313.08	9444.64	1766.45	13366.2	11336.7	-6265.02	3941.16	-74.5835	-3285.6	6645.79	4761.58	1267.92	-1923.47	6272.88
15	acceptor	71864.3	74773.6	82364.8	64443.3	76048.5	83381.7	77440.3	60495.7	80415.9	46715.1	54340.6	83308.7	55003.6	70884.2	96188.1	50756	77630.2	110270	66216.3	60654.6	81621.2	87328.9	65337.9	68206.3	76992.1	81532.4	69724.3	71696.8	77950.4	87565.5	63101.1	75963.2	57235	48834.6	81731.7	75050.2	75656.5	47657.3	80205.3	85930.7	57169.8	95287	86181.4	70815.3	94637	92443.6	100530	97013.3
15	fret	0.893499	0.826738	1.20794	0.727867	0.952284	1.01118	0.982733	0.935043	0.874265	0.74802	0.831791	1.01728	0.756085	0.961415	0.983748	0.847965	1.16604	0.975625	0.792401	0.955327	0.834823	0.791392	1.00508	0.859089	0.926932	1.07629	0.950255	1.02541	1.01728	1.10584	0.929973	0.943155	0.863136	0.69565	0.961415	0.888436	0.977656	0.7813	0.876289	1.07833	0.935043	1.00101	1.03965	0.913757	0.952284	0.986795	1.01931	0.939098
16	donor	171855	165580	168692	178220	175250	184876	160309	178708	177683	156400	195862	200206	232964	192299	245527	240804	290931	228192	170683	-2205.43	-3515.04	-7117.02	4718.97	1235.27	-818.396	6142.56	-6243.94	-2844.1	-8375.02	-11007.1	2817.99	235.316	-1700.08	-2648.42	-14355.4	-2921.52	-3676.32	14544.3	2205.11	144.996	-4547.25	2202.96	-4491.34	2740.57	-4887.02	37.4764	-8553.51	830.985
16	acceptor	74448.4	86169.6	84037	78236.1	69542.6	41135.9	28461.9	27846.6	23427.6	21441.6	22659.8	14415.1	-3670.13	5182.28	-40.838	-4288.78	-9800.09	-4284.21	-3817.37	-1119	2393.41	-2205.38	-1949.65	5856.36	6120.24	-264.385	4687.23	5286.91	-5473.24	3532.76	374.341	3690.41	-1405.57	-10900.9	4382.08	1239.56	1422.85	307.368	-8549.71	6219.27	9018.99	-1078.34	-4780.95	1903.86	-7647.31	-837.903	1488.87	-3149.8
16	fret	0.302003	0.342171	0.332318	0.305391	0.283715	0.182163	0.151083	0.134662	0.116355	0.120567
17	donor	60307.2	40320	45737	58763.7	87394.5	124066	117059	117611	118727	114505	106800	110822	115228	114351	106707	109961	117154	109860	98015	114112	111792	113890	102599	99503.5	113439	107229	114389	98057.3	107346	114653	126555	110498	100814	106500	106236	102185	110118	100715	113862	111278	103462	116987	111477	106872	108255	111331	129259	130532
17	acceptor	74438.3	73229.6	73538.7	81077.5	46197.4	4176.9	-892.779	-5408.81	852.408	-3857.82	-2484.04	-1748.09	-3246.03	-4833.64	-2423.2	-5397.79	-3333.72	-1282.34	-81.499	-1130.2	-1047.04	822.294	-1330.33	1461.74	-2234.81	-2443.38	-4703.49	-5499.34	-8209.49	3044.03	-3683.16	338.522	-3566.01	-5387.79	598.258	-272.81	-5062.62	-947.269	-7677.84	-930.148	-5403.59	-6793.63	-3948.53	-5037.65	-1880.17	-1069.41	-1299.41	-530.072
17	fret	0.552146	0.645237	0.616152	0.580039
18	donor	-492.18	3958.54	1840.22	748.99	5103.5	2281.29	1148	4879	2079.29	2719.45	133.403	918.089	68987.9	89514.7	96956.7	94157	90931.2	99697.3	90629.7	92174.5	85233.5	84234.3	95946.7	83523.8	97062.1	95617.3	97556.1	88309.4	47084.6	463.688	1770.25	-422.624	-2754.19	-884.939	865.61	-726.669	606.547	911.425	1768.58	-374.31	207.124	-0.293216	-1322.68	-877.442	-1475.54	461.189	-1989.5	-1104.02
18	acceptor	92284.8	88626.8	85975.3	74863.5	79612.1	81049.7	89642	75383.5	83767.7	89465.4	82124.2	79385.8	20427.6	922.209	-4053.17	1339.6	-860.826	1031.53	-1568.49	7041.7	2421.47	-836.561	5044.2	4386.65	838.974	4355.39	-527.036	6884	908.264	2939.49	2356.69	4674.97	4287.9	3406.32	4570.71	869.519	6003.48	2680.86	1333.83	5490.41	6113.05	1991.98	5661.1	147.689	2155.45	2088.7	-508.861	1323.73
18	fret	1.00499	0.957152	0.979088	0.989984	0.940147	0.972359	0.987474	0.939294	0.975725	0.970674	0.998333	0.988311
19	donor	9946.41	12079.9	16179.9	19548.3	17906.1	17281.6	14915	13360.8	15447.3	15208.2	11422.5	12115	20494.9	12848.5	14423.6	17242.6	16148.8	10936.1	14060.3	17084.5	15825.6	10715	12472.2	11302.4	16751.3	19255.1	18430.5	13605	11253.3	14343.6	10463.8	15735.5	19602.3	15073.1	13010.6	14413.6	16217.9	17253.6	14564.7	11894.8	15106.1	8161.14	16687.2	13193.7	14907	12516.2	18766.7	16670.2
19	acceptor	56101.6	49298.9	58199.5	57158.5	45352.2	48403.3	56828.6	57090.7	53850.8	44553.7	54784.6	55429.1	46364.6	51542.7	49279.7	50146.3	51098.2	56398.2	53245.5	45527.4	61828.2	55596.2	49526.6	52057.2	57533.1	50143.3	36255.1	53806.7	66079.4	48368.5	63511.4	48658.5	47603.7	52974.6	53422.7	57678.3	46965.9	58841.1	54551.2	51879.9	57969.2	50353.3	54525	49656.8	49929.2	52538.3	48457	53077.7
19	fret	0.848965	0.803024	0.782832	0.745181	0.717056	0.736464	0.792454	0.810701	0.777052	0.745181	0.827951	0.820286	0.693697	0.800143	0.773196	0.744213	0.759685	0.837507	0.791492	0.726766	0.796299	0.838463	0.799182	0.821244	0.774161	0.722884	0.663412	0.798221	0.854687	0.771268	0.858499	0.75582	0.70831	0.778016	0.803984	0.800143	0.743245	0.773196	0.789569	0.813578	0.793416	0.860404	0.765479	0.790531	0.770303	0.807823	0.720942	0.760651
20	donor	14342	16559.9	14161.7	17004.3	10550.2	12944.4	18366.6	12460.7	12928.3	20401.1	17122.2	16914.6	19195.9	14186.9	9904.3	13011.9	22406.4	12341.8	20413.2	14578.8	15001.1	13959.1	12799.3	13267.9	18211.5	17590.7	13005.9	20001.1	19795.5	16031.9	10389	12931.3	16683.8	22331.8	18197.4	15470.6	12141.3	17060.7	19702.8	18763.7	17229	14695.7	14688.7	13778.8	12424.5	14307.8	14048.8	22736.9
20	acceptor	47904.7	46070.3	46501.7	42211.5	41810.8	50539.1	39804.8	38976.3	47207.8	40519.1	44198.9	43587.5	44349.9	52770	33276.4	37185.9	49055.1	51075.7	42562.3	42165.7	45895.8	41603.3	49142.9	52509.7	40047.2	44863.5	47681.4	44694.5	42080	35841.2	42844.4	48009.6	46359.6	47807	52365.3	48017.4	41383.6	50734.5	38832.3	42084.8	42691	40843.3	47137.6	45615	55879.8	50131.2	38129.7	39051.5
20	fret	0.769602	0.735945	0.766634	0.713151	0.798273	0.796297	0.68438	0.757728	0.785424	0.665512	0.721081	0.72009	0.698275	0.78839	0.770591	0.740897	0.686365	0.805189	0.675444	0.742878	0.753769	0.748819	0.793332	0.798273	0.687358	0.718108	0.785424	0.691328	0.680409	0.691328	0.805189	0.787402	0.734954	0.681402	0.741887	0.756738	0.773558	0.748819	0.663525	0.691328	0.712159	0.734954	0.762676	0.767623	0.818028	0.777514	0.730991	0.631713
21	donor	11828.2	15612	5571.07	16221.5	13031.3	11986.7	14009	21002.4	22230.2	19781.6	23752.2	16309.6	19105.2	12781.2	15774.1	13274.4	16926.1	15985.5	14271.5	18263.2	24028.8	16617.9	21830.3	24610.1	13887.4	19214.4	19850.3	15633.1	20507.4	16595	18354.8	16741.2	25934.8	12194.6	14445.8	62589.5	67581.8	61830.3	68552.4	56512.1	66008.7	70601.1	73497.1	68904.7	69949.3	78591.6	78487.6	67627.6
21	acceptor	54544.4	57421.9	67678.4	52670.3	57137.4	72346.4	56185.8	38947.9	43786.3	41476.6	31372.7	55158.3	52962.4	52037.3	44431.5	41897.1	34429.6	40856.1	38689.4	36158.6	24369.8	45715.4	33355.3	40364.4	39162.6	31782.5	26905.4	41949.8	29294	46951	39928.2	41277.2	33054	59207.3	42698.6	12569.8	1880.66	-419.096	635.199	1761.95	-3587.35	1917.21	-3643.96	-946.491	2465.67	2057.09	582.406	1086.96
21	fret	0.82187	0.786726	0.923342	0.764755	0.814796	0.857583	0.800716	0.649383	0.663607	0.676821	0.569142	0.771669	0.735045	0.803057	0.738452	0.75901	0.670204	0.719214	0.73051	0.664705	0.503016	0.73391	0.604071	0.621218	0.738452	0.623372	0.575449	0.728246	0.588122	0.738452	0.684568	0.711342	0.560761	0.828967	0.747565
22	donor	50561.8	53876	45660.6	55603.3	48137.4	53633.3	53224.1	50975.8	52493.7	43745.4	36291.4	23703	4717.03	45525	54965.7	71931.8	43688.3	65800.6	58084.8	68032.2	46112.7	52113	56038.7	59174.5	48706	46569.5	53545.3	50447.6	53514.4	51204.2	36719.6	37166.9	35415.8	32779.7	48025.6	58287.1	15794.6	8580.84	5204.76	12271	44920.7	61943.9	46824.1	45965.2	35803.6	61275.3	54801.5	51396.9
22	acceptor	25245.8	15148	16953.9	21335.8	24084.6	19163.4	26673.9	23215	9888.43	23118.1	35334.8	44385.8	52374	28599.7	20704.9	18989.3	22799.8	20739.1	22569.9	20626.9	28945.4	22954	24966.4	30085	12805.1	24982.3	29853.1	29497.4	33459	17223.1	29028.1	36189.4	47360.1	54297	35134.5	28338.8	73977	46045.5	54627.3	51485.7	27199.1	13463.1	28353.8	28698.5	28532.4	27316.5	26389.1	23642.2
22	fret	0.333454	0.219892	0.271181	0.277211	0.333454	0.263139	0.333454	0.313375	0.158469	0.345497	0.493765	0.651516	0.917838	0.385617	0.273191	0.208822	0.342486	0.240012	0.280226	0.232971	0.385617	0.305341	0.308354	0.337469	0.207815	0.349511	0.357537	0.36857	0.384615	0.25208	0.441726	0.493765	0.571711	0.6236	0.422697	0.327431	0.823613	0.842473	0.912884	0.807724	0.377596	0.178617	0.377596	0.384615	0.443728	0.308354	0.325423	0.315383
23	donor	13221.1	13535.3	15302.1	17430.8	7453.97	14395.9	12141.9	10295.4	1356.74	13548.9	13972.4	12046.2	7752.23	15415.9	4136.7	11907.4	14327.6	9147.9	12802.1	4655.8	17592.5	9896.97	10928.3	12900	22667.5	11629.6	15236	11440.6	17590.2	7014.56	-3686.34	13070.8	13767.5	15363.5	16895.8	16991.4	19327.4	21806.8	7369.73	24794	12879.6	12180.6	10978.4	10461.6	18967.7	11527.1	8473.97	30322
23	acceptor	28327.8	34098.7	23497.4	45082.3	40486.4	33409.3	36468.1	22083.8	40259.5	38891.9	38605.9	31092.9	53817.1	24507.4	33634.1	35548.6	36345.7	31484.7	36354.6	35579.5	33846	24484.9	43060.4	40174.1	37867.6	34879.3	48738.8	33359.9	43383.1	24551.6	34687.9	35064.5	38041.8	35883.3	29298.6	40039.7	31548.5	33551.7	39959.2	41555.3	29341.4	35201.8	41075.8	32070.5	34304.5	41908.5	36877.5	42345.9
23	fret	0.681648	0.715869	0.605112	0.721435	0.844961	0.699248	0.750594	0.681648	0.96771	0.741584	0.733728	0.720321	0.874482	0.61361	0.889976	0.749466	0.716981	0.774409	0.739336	0.884005	0.657662	0.712535	0.797314	0.757374	0.625347	0.749466	0.761905	0.744958	0.711425	0.777812	1.11902	0.728132	0.733728	0.700353	0.63392	0.702563	0.620005	0.606172	0.843788	0.626417	0.694836	0.742708	0.789272	0.753981	0.643588	0.784689	0.813478	0.582951
24	donor	19477	18739	9152.26	33298.5	25794.6	12462.8	-4579.58	27201.6	42050.7	35140	31312.2	16145.8	21028.8	19125.2	11752.4	14731.9	31291.5	19897.7	23311.7	24222.1	24401.4	21456.4	36657.3	8110.82	28098.2	21621.9	27898.2	16718.2	23387.6	18076.9	37140.1	30043.1	23242.7	15083.6	21580.6	10028.2	43947.4	10573	27484.4	20932.3	35119.3	24870.4	22573.7	23511.7	19187.3	2986.38	28312	28146.5
24	acceptor	30713.5	18304.1	34306.6	32828.1	34083.8	28837.6	21295.1	25313.1	36203.5	16286.2	37323.1	17819.3	28758.2	30652	22865.9	32415.5	34415.3	23608.3	38232.3	37884.7	33008.6	26250.6	21300.9	18048.6	16865.8	32877.9	33735.8	17848	43189.8	20701.6	24899.2	41446.5	25963.3	22755.1	33058.9	26676.9	28281.6	22499.2	29568.9	29718.3	30232.4	21454.9	22189.2	42097.1	42196.2	35312.9	36806.9	27346.8
24	fret	0.612087	0.493737	0.78874	0.496953	0.56942	0.697958	1.27417	0.482041	0.462182	0.316567	0.544292	0.524186	0.577599	0.615725	0.660443	0.687471	0.524186	0.543164	0.621817	0.60967	0.575265	0.549953	0.367095	0.690083	0.3755	0.603651	0.547685	0.516481	0.649075	0.534186	0.401209	0.579939	0.527508	0.601254	0.604852	0.727358	0.391599	0.679676	0.518676	0.586993	0.462182	0.463217	0.495879	0.641567	0.687471	0.921345	0.564796	0.492668
25	donor	20847.5	11531.2	20269.8	20253.3	17831	17748.7	19657.3	15364.8	12725	12907.8	21302.7	13258.8	18235	15140	22408.7	13452.6	18416	20995.5	16068.7	17467.2	9611.63	13127.2	13214.9	16613.5	18321	16776.2	15931.6	13699.4	14183.8	16937	14193	28194.8	77820	91399.6	94847.5	95904.1	83311.8	96169.2	84843.8	89533	94785.3	95119.9	88448.9	95651.9	90501.9	79143.6	99258.8	90907.8
25	acceptor	62637.9	75083.3	78609	72201.9	70086.8	70293.1	74516.1	74944.5	74138.4	78185.1	67723.3	79472.9	66568.9	75186.9	81969.3	79119	65141	69439.2	71339.2	79574.7	80837.5	75924.6	75704.2	69219.1	75734.6	71872.6	81292.6	77601.9	71243.5	73035.5	80452.2	52839.4	903.423	1195.77	760.27	3601.64	-5921.32	7085.03	-1144.31	2901.27	1123.9	-1657.19	2988.58	-6306.76	-3016.89	6965.2	-1416.86	467.706
25	fret	0.750421	0.867316	0.794727	0.781272	0.797607	0.798566	0.790885	0.830161	0.853049	0.858759	0.761041	0.856856	0.785119	0.832071	0.785119	0.854953	0.779348	0.767791	0.815818	0.819646	0.893868	0.853049	0.851145	0.806239	0.80528	0.81103	0.83589	0.850192	0.833981	0.811988	0.850192
26	donor	57732.8	48155.7	48497.6	52577.8	46900.2	50294.6	46221.1	43922.7	50796	48231.8	52623.7	51991.5	54338.4	58505.1	118628	109043	111456	123643	118098	116943	110937	117676	119580	123857	124268	127289	122099	119114	120839	120093	123365	117153	129334	133340	121550	122510	123941	124636	122601	125240	125612	125153	125802	120753	10896.5	1495.63	-1408.87	-114.795
26	acceptor	66270	69669.3	73357.6	73090.8	75292.9	66680.7	73648	67395.7	61272.3	74896.7	70578.8	74445.2	69531	68442.9	-4150.09	-107.351	2117.92	-2776.29	-1842.47	4123.11	-172.008	-924.632	304.553	-330.594	-3437.41	-976.605	2531.05	-6520.87	2964.28	-1500.74	-745.902	-5906.1	-2917.11	-4127.76	-4174.07	-1982.26	-1082.02	813.85	3975.99	-578.831	-4222.43	-6890.99	-2070.4	-3409.75	417.325	459.821	-1371.11	-955.626
26	fret	0.53491	0.59101	0.601668	0.581274	0.616116	0.570513	0.614195	0.605531	0.546843	0.608423	0.572473	0.589066	0.561668
27	donor	33726.9	76096	153444	161203	157706	154869	142881	152652	148222	161444	155128	164270	158723	50469.8	34533.7	30868.1	31942.3	40413.5	27213.5	33514.2	32192.3	23786.8	30311.2	33446.3	37022	23074.3	39225.3	41755.2	31405.2	39444.5	39753.6	37784.9	30480	30133.7	32240.5	35932.4	32488.2	33102.1	35340.5	39950.9	30806.7	36594.5	40494.6	35410.6	31150.9	30477.8	28395.1	30922.9
27	acceptor	76183	48561.3	-1918.18	4333.91	-1842.97	1458.92	-903.543	2793.14	381.359	1999.66	2822.9	4446.62	-3825.81	70683	87853	81911.9	83847	84148.4	93626.4	75571.6	79591.6	72045.7	80570.3	85093	83658	83253.7	83450.4	86168	85051.1	80986.5	78929.3	83833.7	72053.6	85456.1	89895	82376	93434.5	86879.7	88952.8	89799.5	85242.5	88639	88876.6	86596.2	83859.9	81693.2	73533.2	79504.7
27	fret	0.692669	0.389586	-0.0127867	0.0258952	-0.0120375	0.00909014	-0.00603049	0.018234	0.00226753	0.0121321	0.018234	0.0266634	-0.0247248	0.583797	0.717746	0.725795	0.724643	0.67576	0.774813	0.692669	0.712018	0.751315	0.726948	0.717746	0.692669	0.783105	0.680255	0.673517	0.73041	0.672397	0.664571	0.689275	0.702888	0.739673	0.736194	0.696069	0.741995	0.724643	0.715453	0.691537	0.735036	0.707447	0.687016	0.709731	0.729255	0.728101	0.721191	0.720042
28	donor	26399.1	30525.1	16163.6	20269.7	18171.4	14341.1	16574	25823.2	19993.9	17681.6	23082.9	19001.1	15859.1	22846.8	20980.2	20029.2	21970.9	23766.9	18862	19515.1	20812.5	19799.8	17719.1	24980.4	18202.3	18954.7	20783.8	17701.5	29380	18495.8	26013	18085.4	30745.7	23413.8	23144.7	17862.6	20042.5	25653.3	29079.9	20772.8	21245	22440.8	22193.7	17761.1	18568.6	22941.7	25882.8	24314.1
28	acceptor	61506.8	67361.3	68693.8	61013	69608.6	63468.1	69938.5	71651.2	66622.4	68706.4	57304.1	61385.2	64982.6	68363.1	57026.9	70015	67781.3	69371.9	63964.2	62277	62348	55493.5	63776.7	66907.3	66049.4	62341.4	65740.6	59036.7	60863.8	63366.9	59348.5	67159.6	58749.6	66889.3	69464.3	67293.7	71271.8	60583.4	64259.9	78914.9	59558.7	66791.8	60809.7	62539.9	74752.7	69339.9	71578	67545.1
28	fret	0.699651	0.688559	0.809818	0.750125	0.792604	0.815897	0.808807	0.734972	0.769333	0.795642	0.712764	0.763265	0.803742	0.749114	0.730932	0.777425	0.755178	0.745073	0.772367	0.761243	0.750125	0.736992	0.782484	0.727903	0.783495	0.76731	0.760232	0.769333	0.674454	0.77439	0.695618	0.787543	0.656328	0.741032	0.750125	0.79058	0.78046	0.702676	0.688559	0.791592	0.736992	0.748104	0.732952	0.778436	0.800704	0.751135	0.733962	0.734972
29	donor	4683.13	5813.15	1091.28	4823.57	6387.84	1858.08	5916.46	8859.36	5740.5	1561.04	4991.46	2878.32	3645.12	5110.92	1167.15	3691.94	4263.4	5002.76	5330.47	9700.42	8636.58	10021.7	4289.23	3511.13	-246.99	8144.22	2545.77	4476.49	3874.35	2896.08	2889.62	4750.93	4665.37	7698.67	6210.27	2594.2	5107.69	1157.46	7440.38	7254.73	1995.29	3872.74	5522.57	2933.21	7811.67	293.805	5740.5	4024.49
29	acceptor	65455.7	58469.9	71749	75323.4	62321.8	76359	72354.1	76722.8	69418.8	68441.4	59505.6	70456.5	77915.8	71788.4	53588.9	58498.7	71703.6	72796.5	64517.8	57804.6	64018.4	59891	63265.8	76832.7	80981.5	77599.9	65152.8	72727.2	67177.1	67866.9	82341.8	67700.4	64967.9	72956.1	68480.3	69400.1	73289.9	67915	69709.4	77930.1	65593.6	68342.2	63364.5	72673.6	70838.1	73903.3	70123.1	79806.8
29	fret	0.932847	0.909911	0.985024	0.94016	0.907436	0.976297	0.924688	0.896677	0.92387	0.977887	0.922233	0.961125	0.955504	0.933661	0.978681	0.940971	0.94421	0.936101	0.92387	0.856406	0.880839	0.856406	0.936913	0.956308	1.00314	0.904959	0.962728	0.941781	0.945828	0.958718	0.96593	0.934475	0.932847	0.904959	0.916493	0.96433	0.934475	0.98344	0.903305	0.914849	0.970722	0.946636	0.919775	0.961125	0.900822	0.996071	0.924688	0.952284
30	donor	32436	32501.9	40581.4	41058.2	49116.4	50209.4	53352.8	40642.4	97894.2	94199.4	100098	89438.8	102586	88106.8	94664.9	97451	96736.5	94255.4	130312	131498	126233	122567	126288	121844	129430	120810	116070	132326	140382	136936	132410	118445	120121	129665	128867	130015	116634	119460	130717	107077	102702	103236	119776	116447	122253	120152	108704	120182
30	acceptor	48981.9	45676.9	39903.7	50010.8	42043.3	31144.8	31800	29594.6	5611.3	1769.75	-223.551	-1211.63	1358.47	3280.91	-2539.63	1217.7	2547.52	2862.99	17178.3	7789.46	12008.5	9386.32	8533.09	11531.8	12674.6	14678.8	11737.3	14094.1	15531.1	12931.7	17581.6	10812.8	12461.9	12932.7	12902.5	12225.4	14234.9	14606.6	9712.85	8566.06	-362.783	1238.34	2481.04	-1577.52	1037.88	1489.42	-2765.84	4408.96
30	fret	0.602234	0.584602	0.495659	0.549379	0.46152	0.382572	0.37388	0.421793	0.0540318	0.0184458	-0.00219166	-0.0138181	0.0129579	0.035853	-0.0275672	0.0125039	0.0258817	0.0296516	0.116639	0.0560455	0.0869119	0.070939	0.0631701	0.0863699	0.0890869	0.108591	0.0918208	0.096231	0.0995678	0.0863699	0.117219	0.0836646	0.0940204	0.0907252	0.0912727	0.0858285	0.108591	0.109161
31	donor	29255.2	26608.6	24654.3	23288.4	21399.3	25217.8	26399.1	23685.7	29536.1	23872	21118.3	30801.2	45851.7	104748	106988	96330.5	95931.6	93904.4	95675.5	108016	98629.4	104472	96678.2	104908	101054	103986	99102.8	103744	103261	102504	103455	96434.5	97631.3	100979	104827	109186	101602	99633.7	92057.2	105541	109666	103132	106533	107743	107240	106408	104474	104158
31	acceptor	73094.8	81505.1	65956.3	67619.8	76162.6	71900	77153	78507.1	75366.6	79717.8	80303.7	80584.4	57342.7	-2585.99	-3983.32	-1098.08	1285.12	-1594.87	-969.041	3713.62	-8421.43	-652.056	-1239.93	3541.11	-5249.26	-211.869	-2342.72	-1336.51	390.331	-2620.51	1281.72	-351.897	376.825	1691.87	-5493.39	-4130.27	-1072.46	-2834.1	3011.88	-2731.68	-1749.47	728.073	2897.25	-1973.74	1081.34	-5073.47	-776.694	-224.871
31	fret	0.713708	0.753571	0.728001	0.743336	0.780226	0.740267	0.745382	0.767915	0.718811	0.769966	0.791522	0.723916
32	donor	-1833.93	1546.6	6294.14	10581.3	4442.79	-644.325	9051.02	11974.4	5655.26	8560.16	6664.19	7695.98	3837.65	1222.26	5264.53	5328.74	4747.54	8189.02	-71.8335	7938.69	2747.09	2158.27	10769.6	14699.7	12624.2	5289.56	7327.02	8297.86	2100.59	7541.43	6356.18	9313.32	2037.46	4874.88	8063.85	9315.5	2823.27	-690.037	3211.83	6117.82	9322.03	9653.99	5559.48	8870.35	12421.8	11169	10317.9	6191.83
32	acceptor	28033.4	36202.2	30918.7	30382.3	30793.5	43801.1	39121.2	45238.8	30285.9	29005.3	30359	34332	35952.6	42451.8	38927.1	35803.2	27495.2	41223.1	33702.1	31206.4	41247.5	36577.3	41116.5	39584.5	35080.8	41819.4	31356.3	44892.8	34837.2	35217.5	34036.6	45976.2	36573.6	35804.5	32734	44720.7	35489.2	38712.6	40191.7	24571.9	33851.5	32634	42587.5	41472.5	43690.6	33530.6	30318.5	38338.7
32	fret	1.0701	0.958573	0.831023	0.741254	0.874092	1.01501	0.811805	0.79061	0.842531	0.772259	0.820459	0.816614	0.903622	0.971778	0.88077	0.870273	0.853066	0.833902	1.00188	0.79736	0.937775	0.944399	0.792539	0.729595	0.735427	0.887442	0.810843	0.844448	0.943453	0.823347	0.842531	0.831983	0.947236	0.879816	0.802178	0.827188	0.926408	1.01783	0.926408	0.800251	0.783854	0.771292	0.884583	0.823347	0.779025	0.749986	0.746106	0.860718
33	donor	371.659	549.496	-241.778	5834.64	3366.91	-129.88	943.133	3512.77	4415.94	447.589	-4623.75	5944.54	5411.03	-3267	5800.67	-4162.18	2695.52	289.734	7101.47	-4839.55	6060.43	-3446.83	16265.1	587.46	2479.72	-5215.21	3838.47	-251.769	-4461.9	-877.194	7579.04	-415.618	-923.152	-2004.16	5265.16	1562.56	12614.4	11831.1	2619.59	-1336.77	2917.32	-3001.24	1154.94	3726.58	-3183.07	-1990.17	4234.11	-1552.57
33	acceptor	70057.5	49167	53632.9	58938.4	46448.3	61733.3	71272.7	67280.3	55045.1	62844.5	69868.3	56707.4	62828.8	48170.3	57777.3	64501	56699.1	63935.3	63527.6	61834.9	54149.3	65825.7	57561	69412.9	70245.1	71268.2	65006.4	70117	57883.9	56251.2	65450.6	60828.9	51951.3	70139.7	61858.8	55427.5	64872.1	65010.4	50373.2	65367.6	71780.4	50271.5	57794.7	74142.5	67361.2	70640.7	81346.6	64199.3
33	fret	0.994985	0.988967	1.00501	0.909754	0.932813	1.00201	0.986962	0.95086	0.925794	0.992979	1.07123	0.904742	0.920782	1.07324	0.908752	1.06922	0.954871	0.995988	0.89973	1.08528	0.89973	1.05517	0.779486	0.991976	0.965901	1.07926	0.943841	1.00401	1.08327	1.01605	0.895721	1.00702	1.01805	1.02909	0.921784	0.972921	0.837593	0.845609	0.95086	1.02106	0.960888	1.0632	0.979941	0.951863	1.04915	1.02909	0.95086	1.02508
34	donor	-2420.24	6814.16	-554.124	-1289.45	3798.02	1611.26	4020.33	2804.04	4625.26	-3805.4	7100.59	11555.3	273.125	6294.72	-2375.35	4830.47	645.066	9535.31	4165.68	54659.9	48698.1	77038.3	47084.3	65305.1	50842.2	68000.6	50632.7	70745.3	41945.5	74101.3	82788.5	70894.9	71390.8	50258.6	50427.5	69518.3	78957.9	87773.3	55311.9	57492.2	79518	70396.8	57661.1	81140.4	68312.7	65751.9	85265.9	74887.9
[truncated: 356 more rows]
[truncated: 1,162 more columns]

## Sheet: 389-389_inter_liposome
1	donor	40526.3	24310.5	27092	18327.4	32702.5	39414.9	39869.5	33334	30752.9	54017.3	42883.2	32931.4	37937.3	32789.3	41430.8	37007.5	16145.7	10772	20038.6	28293.4	34072.8	37441.6	30361.4	31114.4	20210.7	26697.4	31037	37882	30206.7	20010.2	26015.4	16815.1	27234.1	19546.1	26138.5	35439.9	35370.4	26495.3	117485	124542	126438	129388	110945	128581	124156	125361	113628	123564
[truncated: 407 more rows]
[truncated: 1,162 more columns]

[truncated: 16 more sheets: 399-399_inter_liposome, 400-400_R304W_inter_liposome, 400-400_dCC1_inter_liposome, 400-400_inter_liposome, 401-401_inter_liposome, 417-417_inter_avitag, 417-417_inter_liposome, 417-417_R304W_inter_liposome, 431-337_intra_avitag, 431-363_intra_avitag, 431-378_intra_avitag, 431-389_intra_avitag, 431-431_R304W_inter_liposome, 431-431_dCC1_inter_liposome, 431-431_inter_liposome, 449-449_inter_liposome]
