# Supplementary material for: Conformational dynamics of auto-inhibition in the ER calcium sensor STIM1
Source: eLife. 2021 Nov 3;10:e66194. doi: 10.7554/eLife.66194 (PMC8651296; doi:10.7554/eLife.66194)
Supplement: Figure 1—figure supplement 2—source data 1. [file elife-66194-fig1-figsupp2-data1.xlsx]

## Sheet: 239-239_inter_avitag
1	donor	849.858	577.16	1641.4	743.639	-391.073	-724.03	-1357.26	121.641	2059.13	74601	76260.7	56849	59837.5	57629.3	56984.9	59382	65036.1	74229.2	93439.6	63682.8	66050.3	54807.4	50414.6	51201	56049.3	54792	53814.6	57199.3	64292.6	59503.5	78516.8	56807.1	59006.1	54968.7	59285.9	65565.2	58753.8	58762	56012.5	66606.9	57456.7	56828.6	53673.7	64855.3	52655.4	60762.8	60928.3	43613.5
1	acceptor	60211.6	71593.6	65304.6	63564.6	75033.9	65165.1	68043.1	84911.6	77880.6	-5155.23	-1501.69	-1336.05	-4398.49	2924.49	-4846.07	-1183.85	-1984.44	-2352.27	-1659.25	-3308.09	-4442.52	146.888	-1538.7	-1464.75	-5243.17	-74.493	3232.44	-3849.82	4158.32	-2725.03	-2287.66	4611.99	2669.01	-866.483	-2109.12	429.655	-2876.18	-2819.22	-1340.97	-101.013	1082.9	-6889.14	-1293.6	-1707.45	-2799.72	2873.82	257.597	622.261
1	fret	0.986243	0.992372	0.97546	0.988544	1.00534	1.0114	1.02042	0.998477	0.973914
2	donor	90284.9	84066.4	88678	88145.4	87484.2	85349.9	95001.7	96660.5	87836.2	80395.4	91373.5	86173.4	88076.5	93774.1	85482.4	85030.3	87754.4	85860.4	147935	110298	128493	112244	113131	118806	110681	117584	108531	126811	120832	118048	109660	120969	109899	115891	117149	105183	126767	118347	121329	119757	125991	122179	115703	110746	117528	121715	136308	128639
2	acceptor	25397.4	27766.6	26474.2	31012.4	33549.9	30594.7	26716.2	42778	27583.5	17533	23190.9	25553	26436.7	30135.5	25626	23230.1	21699	31815.6	3784.4	-2083.12	-1321.45	1812.15	-3523.23	-5372.09	-3646.03	-617.381	945.769	-9955.2	-1740.18	-6975.68	-4898.31	1583.6	2952.78	-3056.29	-3995.2	-320.7	-5870.69	340.417	-9017.44	-2658.2	1659.54	-1353.13	-3986.64	-8981.67	17.462	-10382.9	-5432.31	-4830.49
2	fret	0.219656	0.24807	0.229809	0.260235	0.277454	0.264288	0.219656	0.30679	0.238942	0.178987	0.202382	0.228794	0.230824	0.242999	0.230824	0.214577	0.198316
3	donor	60362	85374	74222.3	71706.8	52267.8	52206.6	54423.2	72906.1	67574.3	68820	68114.6	67089.8	70086.1	71812.6	58026.6	73323.8	68790.3	71276.1	68029.2	77942.6	61984.5	66135.6	53116.2	46976.9	64084.2	72703.7	63608.9	64618.8	86625.3	75772.4	84236	74471.1	58938.1	75143.1	77458.1	72642.5	62038.4	66414	61058.2	69473.5	64932.6	64262.4	69974.7	67906.6	75315.7	71415.3	66302.7	68708.6
3	acceptor	19555.3	10729.6	6772.16	12841.5	41905.9	34701.8	25879.7	14444.1	16611.6	20953.7	13111.1	7174.19	13054.6	13326.3	20739.3	23630	20291.1	16736.9	9178.57	16746.2	24328.5	18256.9	28155.5	45728.8	14019	16297.2	18304.9	17884.4	5573.28	9432.21	6566.78	12930.9	23451.3	10332.7	7377.42	10163.6	18039	21792.5	16700.9	11639.7	12931.8	16922.5	10988.3	14432.2	17036.3	9267.29	18178	8479.96
3	fret	0.244399	0.111845	0.0837274	0.152067	0.444876	0.399011	0.322708	0.165421	0.197582	0.233007	0.161236	0.0965206	0.157062	0.156228	0.262969	0.24352	0.227775	0.189908	0.11916	0.177196	0.281748	0.216496	0.346833	0.49297	0.17973	0.183116	0.223428	0.216496	0.0608008	0.111034	0.0726177	0.147917	0.28444	0.120789	0.086916	0.12242	0.225165	0.247039	0.214767	0.143777	0.166259	0.208732	0.135526	0.175509	0.184811	0.115093	0.214767	0.110224
4	donor	135974	114027	123117	120013	441273	500519	446255	500837	472530	460810	358763	373013	347338	398400	458082	513885	535173	476050	481309	381680	331081	304925	255232	363709	337202	300845	303570	353057	338530	343545	272502	248730	281752	275863	275505	320788	282586	291115	294518	323034	325742	348039	369028	312520	310127	210801	222571	205014
4	acceptor	157235	155209	160479	158865	35751.8	-11.996	-2450.8	918.843	-3881.34	2016.95	-1316.99	813.591	15.848	1386.73	-2279.05	7140.77	6330.16	-520.749	-6085.9	962.408	-4914.03	6921.23	2099.2	-2915.74	-4273.85	-1372.92	-151.984	-4426.83	-4752	-68.703	-6756.48	-3035.85	-2092.44	-3438.16	-2422.95	3126.32	3807.71	-8653.01	-3814.17	1744.94	-2461.7	-3552.41	618.806	-1983.83	-2445.23	-395.433	-2748.61	-4469.15
4	fret	0.536807	0.576521	0.565684	0.569726
5	donor	78142.7	77493.5	85050.8	80035.7	68105.4	60248.1	80252.5	80490.9	74856	72220.3	62766.4	72300.6	75367.4	77044.9	72007.7	71415.4	69067.2	60811.6	74406.2	83306.8	67829.9	76144.8	71181.3	70853.7	72892.9	72649.7	78500.2	76330.4	103887	97752.5	99531.7	98914.3	99852.7	102308	102415	104871	87282.2	101857	100018	98741.8	95542	102375	106553	96721.2	99155.6	95029.3	101228	103583
5	acceptor	13443.4	20309.9	20441.5	8503.2	16268.7	23444.5	27419	25999.4	19078	19368.6	28060.1	27374.5	22898.2	16548.9	39953	33977.2	26137.5	35650.3	22598.1	13387.2	28416.9	28915.9	21228	28097.3	25876.8	23296.5	27196.3	14300.2	286.912	-3204.01	-2329.88	-214.991	-3535.93	-5738.37	-771.1	963.023	-824.533	-2767.43	-6251.02	-3407.3	-3458.78	-822.124	-148.085	3260.82	-4192.14	-929.671	-2350.87	-5558.79
5	fret	0.146892	0.207805	0.193607	0.0960005	0.192592	0.279663	0.254388	0.24427	0.202735	0.211859	0.308946	0.274611	0.233134	0.176355	0.357326	0.322059	0.274611	0.369404	0.233134	0.138757	0.294814	0.275621	0.230096	0.283705	0.262479	0.243258	0.257423
6	donor	79293.5	96358.9	109008	107725	91501.9	109756	89826.3	57234.9	112485	108189	106189	107026	111098	95330.5	72357.8	97185.2	91119.7	86824	57608.5	89735.8	77557	107276	79362.2	79983.6	113973	118036	132036	129322	66121.6	90213.3	88578.7	81933.6	98355.6	115103	94591.8	101652	90339.1	94512.7	103408	97214.8	97332	106784	98916.1	85290.5	113348	116676	50240	111669
6	acceptor	22930.3	12639.2	13591.1	13646.2	21952.2	14347.6	19315.9	32219.5	19529.7	22809	21636.8	13872.2	11498.3	16586.8	33773.2	17927.5	19739	32342.9	49286.6	23145.3	24601.2	19659.8	28299	45443.1	22075.5	3962.84	8236.53	17241.8	37256.3	33554.5	32528.3	14357	26803.9	10763.5	17388	18253.9	23889	21028.8	12598.7	13928.5	28960.1	22589.5	21205.2	24087.8	14916	15920.3	45493.1	26066.5
6	fret	0.224103	0.115662	0.1108	0.112185	0.193727	0.115662	0.177073	0.360073	0.147602	0.174078	0.169607	0.114967	0.0936932	0.148326	0.318579	0.155603	0.177823	0.271335	0.461247	0.205288	0.240899	0.154872	0.263008	0.36192	0.162207	0.0324825	0.0585925	0.117753	0.360073	0.271335	0.268829	0.149051	0.21386	0.085608	0.155603	0.151957	0.209174	0.182339	0.108732	0.125466	0.229669	0.174826	0.176323	0.220149	0.116359	0.119849	0.475714	0.189159
7	donor	54172.1	54626.7	61613.6	59987.8	52463.4	60807.4	59096.5	60744.7	64025.4	50168	59884.8	52750.1	53222.6	53636.9	50662.9	50199.4	59831	49917.2	79488.5	78982.4	69641.8	71749.1	72129.8	82151.1	68110.1	70340.5	71370.7	78928.6	78310.6	5393.5	860.958	-2088.33	133.154	-3991.82	-1640.45	4273.8	-478.201	-3425.25	-319.205	-1150.02	-1217.2	314.545	-1237.36	471.303	-3268.49	1279.73	-1268.71	719.876
7	acceptor	20607.2	22117.6	10787.6	15998.4	18979.2	16236.9	21951.4	19130	27992.6	25490.9	15930.8	24816.5	19871.3	23756.8	21754.1	20076.5	21545	17562.5	-4779.39	469.816	845.549	-515.481	443.358	-4266.95	2881.48	3659.48	-2687.14	1574.52	-352.702	-2071.04	3257.47	-6062.13	-2432.58	-2368.47	-2564.03	4834.09	-514.119	6038.46	-745.096	-1606.02	1018.95	298.277	-2917.96	-3545.7	-2146.27	-1636.6	1727.6	1107.05
7	fret	0.275922	0.288132	0.149196	0.21099	0.265628	0.21099	0.271239	0.239578	0.304171	0.336498	0.210072	0.320293	0.272175	0.30701	0.30039	0.28531
8	donor	71923.8	76173.5	74597	75444.2	76760	85575.5	79670.1	67917	73893.3	69972.2	95130	55089.9	116674	108137	91483.4	93925.5	109008	113579	101360	109357	70240.7	75091.2	66734	77307.7	82711.2	61916.9	60160.6	64179.3	110624	99592.2	103500	106626	103638	107965	108570	123766	121700	113754	110454	113083	121296	121224	127654	107775	53486	-1499.53	453.265	-3144.52
8	acceptor	32378.7	18349.5	20828	20584.2	31197.5	20486.1	16533.2	25074	25971.1	37570.3	13280.8	38646	20396.1	19927.6	19046.6	16506.9	19807	19150.7	19437.7	16386.3	21329.3	25153.1	26085.9	17160.2	18168.5	36607.8	35961.3	33306	-2853.03	-4089.12	-4963.24	-6559.8	-2432.02	3522.35	-1601.29	-3050.67	-2906.77	-3894.87	-7727.57	-2787.93	239.394	-7044.81	-4759.62	-3744.42	-4647.86	-460.1	-6728.72	-3599.22
8	fret	0.310656	0.194448	0.218268	0.21445	0.289354	0.193497	0.171673	0.270056	0.26043	0.349588	0.122633	0.412422	0.148987	0.155594	0.17262	0.14993	0.153706	0.144272	0.161263	0.13015	0.232607	0.250821	0.280662	0.1821	0.180203	0.371111	0.374053
9	donor	414.713	3113.96	3016.13	3747.84	2998.1	4007.36	10033.6	6495.49	7059.85	5665.43	2554.75	4938.35	2643.83	4978.52	5154.11	4083.57	404.414	3217.98	1570.73	4537.22	55233.4	80644	78444.3	84317.5	76856.2	74828.4	87701.6	83688.3	80273.8	89774.2	97376.1	94690.7	91899.8	82796.4	81140.4	85231	87410.7	75375.8	86770.6	84115.7	73752.2	77441.7	84299.5	86945.2	86800	86107.4	76589.5	75384
9	acceptor	66977.9	66953.9	69482.5	69890.6	78629.5	69716.1	70970.7	71058.7	91933.8	82917.3	74197.4	67249.5	75546.2	77186.2	87898.8	69970.9	77433.7	77662.6	72223.8	76022.1	31676.9	247.641	27.774	-2394.37	-2507.52	54.592	-953.089	-461.825	-2347.74	2348.51	-118.586	5472.35	-3712.95	-1995.99	-3108.92	-3239.55	-4642.86	-1088.85	-1600.72	1506.66	-447.831	-2267.05	-1021.77	-6916.13	-1244.69	-6079.75	-3835.33	-1294.03
9	fret	0.994141	0.955303	0.958704	0.949342	0.962949	0.945928	0.875827	0.91587	0.928795	0.935662	0.966339	0.931372	0.966339	0.939089	0.94422	0.945074	0.994979	0.960403	0.979014	0.943366
10	donor	62971.1	46481.7	44129.4	48415	54454.6	22108.3	31330.9	9507.14	25865.5	5947.3	-2361.08	58628	74966.7	77694.9	81810	82147.4	71356.6	80921.9	70685.6	78538.2	65039	87658.5	82620.2	75267.2	70689.1	90192	83135.1	76612.9	71258.8	66390.1	66333.5	65397.8	60337.1	70952	75305.8	73004.7	85827.4	71776.5	63652	64087.1	75490.6	60865.5	75102.2	78941.9	80875.2	80791.8	81956.3	84785.8
10	acceptor	24766.9	32565.7	42961.7	31166.4	32199.4	63715.7	32244.4	95240.9	54916.6	13223.4	-943.568	-1863.68	-2898.24	-2749.01	-4633.76	-4009.64	4666.51	-2132.21	-2344.94	-2642.22	-4964.04	-7196.38	-1089.42	-2551.64	-357.702	-2380.49	883.986	328.318	3323.22	2284.59	-5525.82	-2143.58	-6736	-134.005	377.765	2000.14	-791.34	3074.1	-661.321	-975.011	-5238.74	-579.861	890.77	-2097.83	-6773.49	-1418.09	-2780.3	-1249.36
10	fret	0.281828	0.412414	0.49372	0.391908	0.371524	0.742505	0.506793	0.909433	0.679389
11	donor	43566.1	38690	39882.6	33965.7	34812.9	33576.2	36841.6	43816.9	38965	26598.8	30781.7	29201.8	36617.2	25835.2	17119.4	33769.9	33943.7	37378.5	34238.6	33074.5	23386.2	30198.6	31111.8	21163.8	24823	27756.2	31961.1	29606.7	35695.2	30577.1	38076.1	31411	33754.5	29138	28631.9	40078.4	47443.2	37499.6	33499.2	28444.9	35219.9	37840.6	35574.2	20048.2	30735.5	41152.2	21801.9	35622.6
11	acceptor	8074.98	6497.92	13189.7	13486.3	9206.97	14548.3	14188.6	12815.1	11016.5	13515.9	12974.9	14571.2	16829.4	23299	23332.5	10871	11260.6	4333.96	20419.3	6124.97	14437.6	16274.6	21175	26639.9	19859	16440.5	11754.3	10972.7	4612.71	6763.39	6371.51	21400.1	11912.6	8379.31	8379.51	9705.64	11179.5	7248.26	13617.6	-344.055	13332.3	4640.99	5920.31	19069.1	9747.22	4013.05	26404.9	5398.91
11	fret	0.156843	0.143483	0.248163	0.284042	0.209572	0.302536	0.278212	0.225948	0.220164	0.336726	0.296691	0.332808	0.315216	0.474108	0.576573	0.243328	0.24913	0.103549	0.374029	0.155888	0.381906	0.350447	0.404602	0.557379	0.444239	0.372061	0.268503	0.270443	0.113986	0.180763	0.143483	0.40559	0.260749	0.223055	0.225948	0.195153	0.190354	0.161621	0.288904	-0.0121392	0.274328	0.10924	0.142529	0.487088	0.240428	0.088394	0.547293	0.132051
12	donor	85750.9	95124.3	76043.3	85073.2	70686.5	81110	89418.2	80789.3	79588.5	101863	94437.1	91705.2	98228.5	98503.4	89565.2	125537	149989	152350	91365.4	102915	62546.3	84217.9	56126.2	103515	158629	72435.2	122057	121481	118953	116217	94692.9	76948.2	123508	114706	86604.2	101481	137020	120591	141805	128691	115975	84567.3	109458	89948.9	92270.3	84179.7	78920.3	100357
12	acceptor	15481.9	18870.4	19132.5	21560.4	17452.8	12123.1	11251	13719.6	17538.4	24578.1	25243.6	16012.8	20486.1	18514.2	17750.9	21108.7	14608.1	11757.5	7455.81	8546.11	17292.2	17891.6	12077.7	10525.5	22160.5	9172.75	16717.3	7998.55	9900.96	7363.1	12827.3	18034.4	6761.68	9902	12898.5	26279	24677.2	22608.1	18464.3	24172.6	13973.7	23517.7	16305.2	21510.4	25108.5	16738.5	13683.8	14252.3
12	fret	0.152905	0.165919	0.200674	0.20235	0.198162	0.13042	0.111444	0.144834	0.180708	0.193986	0.210765	0.148863	0.172472	0.158584	0.165102	0.144029	0.08886	0.0719769	0.0757931	0.0765603	0.216685	0.174938	0.177408	0.0919526	0.122483	0.11223	0.12011	0.0620999	0.0765603	0.0598309	0.11932	0.189823	0.0515445	0.0796246	0.129627	0.20571	0.152905	0.157771	0.115376	0.157771	0.10752	0.217532	0.129627	0.193153	0.214144	0.165919	0.148057	0.124068
13	donor	109026	117759	135265	127356	115758	122904	128581	117488	137147	119444	135516	132213	142095	118403	135163	120492	107968	103017	132128	113957	115015	111044	105866	100070	109355	101155	100328	112001	120889	112397	101589	121401	121530	125986	111003	112879	116192	108385	113628	108416	129025	110637	105981	101531	119156	90296	122049	121696
13	acceptor	5076.3	7592.91	7313.03	8565.9	11302.2	8104.31	13559.6	8709.36	4364.31	12941.3	5454.86	3229.56	10756.4	3085.65	9563.1	15209.2	12471	4684.33	7871.17	23148.7	6643.39	7358.03	12310.4	19657.9	24029.9	32171.3	18491.6	13528.8	5931.75	1833.15	11037.6	10725.5	7508.19	9843.12	9900.82	6999.18	10039.4	6164.35	11269.2	9422.75	16105.8	9636.38	14476.4	9915.58	10826.7	19326.1	6837.36	13715.9
13	fret	0.0442493	0.0606047	0.0515209	0.0628992	0.0887804	0.0617508	0.0954404	0.0692583	0.0310746	0.0978816	0.0387209	0.0240703	0.0704223	0.0251419	0.0663588	0.112123	0.103413	0.043694	0.0560441	0.168659	0.0543436	0.0623247	0.10403	0.16386	0.180505	0.240996	0.155706	0.107752	0.0470347	0.0161006	0.0978816	0.0810089	0.0583197	0.0727577	0.0816029	0.0583197	0.0798227	0.0537779	0.0899855	0.0798227	0.110871	0.0804155	0.120331	0.0887804	0.0833888	0.176301	0.0532128	0.101563
14	donor	35874	31097.1	37590	36704	36519.4	41015.1	44567.3	38951.9	40290.1	39975	47482.5	42705.6	50721.3	56958.3	44402.9	39062	37086.9	44902.7	39038.3	43305.3	36709.1	38433.5	32491.2	30780.4	32582.7	38767.2	32863.9	41767.2	38706.3	24834.7	39781.9	37659.4	40498.4	35120.2	24501	37413.8	39395.7	41879	38635.1	29604.8	40241	32489.5	28686.7	19368.4	24551.8	32923.2	34107.2	39239.9
14	acceptor	17438.1	17850.5	15505.8	13913.1	19988.7	20149.4	12931.5	11818.7	16324.4	21755.9	14826.7	13721.9	1647.17	5017.29	11570.5	11777.6	18776.7	18090	12630	14620.2	7827.35	12482.4	9898.86	18098.4	9653.37	14834.3	14939.8	7056.85	9562.2	22041.2	17699.5	17855.6	13656.7	11278.3	10168.8	15841.4	9277.17	13820.5	11691.3	17553	14288	21474.2	20070.1	23822.4	32204.2	11589.4	15440	7857.26
14	fret	0.32676	0.364645	0.291766	0.275238	0.353401	0.329839	0.225418	0.232706	0.28867	0.352379	0.237906	0.243103	0.0311149	0.0812556	0.206644	0.231665	0.335993	0.287638	0.244142	0.252448	0.175243	0.245181	0.233746	0.370766	0.228542	0.276272	0.312372	0.144755	0.198284	0.47003	0.308256	0.321625	0.252448	0.243103	0.292798	0.297957	0.190961	0.248296	0.232706	0.371786	0.26178	0.398256	0.411454	0.552006	0.567888	0.260744	0.311343	0.166846
15	donor	44668.7	41727.2	54872.9	46843.1	46640	41351.8	49624.6	40292.3	42894.4	35410.3	46374.4	42833.9	40062.6	41965.2	41936.4	46856.4	44069.8	51365.2	50485.2	41353.9	39752.8	41050.3	44595.9	52992.8	47094.4	40993.9	41625.7	42946.7	47369.3	52247.2	43784.6	45653.4	49371.3	50028.7	42017.5	52073.9	46413.4	42514.9	47141.6	53684.1	47467.7	45984.6	47876.9	49070.8	42323.1	45809.3	42899.5	44082.1
15	acceptor	12424.3	9308.76	11033.7	10442.5	12744.2	13020.5	9601	14320.7	14788.3	14270.1	-2474.46	12310.6	7654.21	15527.8	18930.7	4199.66	7912.04	9478.25	12588	6200.79	2210.23	10660.7	9430.86	7211.35	14388.1	6650.5	13058.1	4451.09	7621.85	8787.49	6902.72	12294.3	9388.07	8619.83	13691.4	14695.2	5998.47	6449.88	10042.7	5492.72	12655.6	5453.78	14828.8	8328.03	6013.32	8380.61	14609.6	12399.5
15	fret	0.217817	0.182825	0.167912	0.181762	0.214646	0.239967	0.162575	0.262026	0.256782	0.287126	-0.056393	0.2231	0.160439	0.270406	0.31107	0.0818934	0.151887	0.156165	0.19982	0.130446	0.0525527	0.206179	0.174308	0.119694	0.233648	0.140105	0.238915	0.0938028	0.139033	0.144392	0.135814	0.21253	0.159371	0.146534	0.246279	0.219933	0.11431	0.13152	0.175374	0.0927204	0.210414	0.105684	0.236809	0.145463	0.123997	0.155097	0.253634	0.219933
16	donor	134649	124567	102149	115191	97896.7	120184	71521.9	96174.4	94113.1	79617.2	60498.2	100057	117268	81359.2	80563.1	84098.4	94128.9	99749.1	135055	138539	121308	121670	131878	131319	147123	137262	131370	144340	124890	126006	141440	148833	147966	123192	129837	121477	127945	120212	118963	112132	111742	112105	126175	126818	127389	123791	121213	131693
16	acceptor	19784.3	24383.9	43867.6	56433.4	47010.2	54840.8	91933.1	71304.9	60771.6	77554.6	86984.2	60126.4	30318.8	64784.2	63603.5	68820.5	54564.3	61230.6	36114.8	25832.7	23590.4	21245	30969.5	22897.4	32080.4	15369	25618.3	17888.2	29010.5	35440.6	16264.5	22647.7	30550.4	26620.5	15842.9	27289.7	30387.7	25461.5	24864	20082.1	27555.6	25270.2	21364.9	26997.8	22369.7	18793.7	27022.3	24456.8
16	fret	0.128332	0.164064	0.300443	0.328928	0.324011	0.313202	0.562801	0.425796	0.392082	0.493565	0.590024	0.375268	0.205752	0.44369	0.440706	0.449662	0.367365	0.38021	0.210611	0.157294	0.163096	0.148596	0.19022	0.148596	0.178586	0.100416	0.163096	0.110034	0.18828	0.219363	0.103301	0.132189	0.170838	0.177617	0.109071	0.183432	0.19216	0.174711	0.172775	0.151495	0.197983	0.184401	0.144733	0.17568	0.149562	0.132189	0.182462	0.156327
17	donor	6082.72	4913.08	7870.69	13028.5	24285.7	18867.9	19465.9	14785.1	43279	28180.7	41342.4	60200.2	49524.8	50432.3	46447.8	47889.8	43686.1	46056.7	42611.8	50706.8	56669.4	28415.9	23312	14087.4	35363.8	19499.4	33430.9	25799.9	13721.8	10845.8	23421.3	29994.8	29508.3	42215.6	43681.7	49964	45447.1	41408	48599.2	46719.4	52011.9	52130.7	52062.9	40140.7	51249.4	50029.5	41683.3	36974.1
17	acceptor	51408.9	54616.1	48768.3	44049.1	34969.6	36266.5	39410.1	46801.1	19896	22837.4	7812.64	1296.12	12871.6	7107.85	14807.1	10560.4	18036.5	15353.4	11116	12866.2	14447.3	41473.1	44945.1	43379	19062.2	46937.2	22178	31774.8	57358.7	52081.4	42790.6	28350.4	32927.7	8446.34	11990.4	18591.5	23392.2	9442.8	14628.6	16427.8	19659	15869.4	19559.6	14399.7	16698.8	15695.5	13418	17396.3
17	fret	0.893907	0.917141	0.86129	0.771522	0.590592	0.658047	0.66919	0.760165	0.31448	0.447338	0.159286	0.02111	0.20646	0.123454	0.241979	0.181207	0.291763	0.250172	0.20646	0.202871	0.202871	0.593496	0.658047	0.754897	0.350263	0.706718	0.398364	0.551399	0.806834	0.827996	0.645893	0.485791	0.527457	0.166619	0.214806	0.271082	0.340268	0.186038	0.231392	0.260656	0.274545	0.233749	0.273391	0.264138	0.245494	0.238456	0.243151	0.320117
18	donor	54011	65774.2	78930.9	44813	62683.4	83948.4	72800.1	76901.4	54784.7	87516.5	71244.2	75273.5	87342.9	76838.1	66616	77254.7	65315.5	71989.3	76308.7	74896.6	73856.4	72094.7	75455.8	72575.7	72626.6	67702.1	58471.8	80343	65252.3	90764.8	93786.1	89559.7	70578.4	66723.9	69641.1	73806.8	64064.5	55965	59246.7	56143.5	52570.4	51587.2	70233.7	78828	85277.4	93765.1	61922.2	78587.5
18	acceptor	45820.1	45877	33543	45541.6	48252.4	38145	38435.7	32913.6	49757.6	32581.2	30090.9	27537.6	32942.6	28875.1	43565.3	46141.3	43376.4	34469.6	32313.7	34515.2	30770.8	36532.5	26155.8	37342.1	34669.5	32326.9	18304.9	26001.7	43086.7	25508.4	33688.8	25141.2	25038.1	26824.7	27912.5	32550.8	26855.3	25509.2	26282.5	21589	23457.5	26265.8	36055.9	33400	24001.1	27128.4	26154	23745.8
18	fret	0.458946	0.41078	0.297875	0.504282	0.435199	0.31253	0.345937	0.2997	0.47595	0.271613	0.296963	0.268021	0.274312	0.273412	0.395318	0.374267	0.399171	0.323601	0.297875	0.315292	0.29423	0.336602	0.257287	0.3394	0.322675	0.323601	0.238658	0.244846	0.397244	0.219349	0.264436	0.219349	0.261751	0.286954	0.286055	0.306104	0.29514	0.31345	0.307021	0.277917	0.308855	0.337534	0.3394	0.297875	0.219349	0.224594	0.296963	0.231606
19	donor	90848.2	77422.6	90250.2	98079.2	93407.9	72453.1	98651.4	96928.3	86845.8	95848.3	90964.2	93820.5	88201.4	95042.4	95575.9	89968.1	86033.4	88051.5	85577.2	90865.9	89147.6	96804.2	97023.4	89350.7	86797.5	93370.8	85337.1	89039.6	89366.8	84789	79502	76461.9	86599.2	87018.3	91712.2	87256.9	126265	91717	85000.2	85409.6	97698.8	80968.8	85524	90105.1	82600	86515.4	81002.6	91779.9
19	acceptor	36580.3	34729.7	22271.7	30222.3	32055.7	32621.4	30471.3	25786.8	28542.9	32822.3	24970.8	20865.2	33649.3	26147.5	16832.8	21635.3	34885.1	34728.8	31052.8	32991.3	31205	31574.3	28284	27674.7	24323.2	23016.5	34561.7	22468.8	35033	36680.2	36307.9	31407.3	22472.7	28131	33513.3	36700	17318.5	30109.9	25424.4	26735.3	35671.6	31597	26097	27712.9	31726.3	25454	25365.8	31862.9
19	fret	0.287303	0.309924	0.198224	0.235339	0.255901	0.310909	0.236318	0.209932	0.247085	0.254921	0.21579	0.181657	0.276498	0.21579	0.149566	0.194324	0.288285	0.282391	0.266686	0.266686	0.258842	0.246105	0.225561	0.236318	0.218721	0.198224	0.288285	0.20115	0.281409	0.302051	0.313863	0.291234	0.206028	0.244147	0.267667	0.29615	0.120467	0.247085	0.230449	0.238275	0.267667	0.280427	0.233383	0.235339	0.27748	0.227516	0.238275	0.257861
20	donor	64617.1	69160.4	74759.4	73145.3	71808	66838.6	69550.4	66204	81595.4	103720	97028.9	95321.6	93532.2	92811.4	94249	97674.5	100159	77248.6	83553.3	75988.4	81407.9	78557.8	75120.3	130329	129747	106950	113222	129467	119997	106481	115258	107535	112021	106590	132464	104694	97578.3	102023	107482	101666	112106	110651	110349	100016	93542.2	110208	96526.6	106696
20	acceptor	24348.4	27033.1	26818.2	21497.8	22789.6	31178.3	28281.6	30544.9	12222.8	-331.99	2280.74	-5144	-1425.32	-31.153	2179.62	-3301.86	-118.69	1245.95	440.66	-945.315	-2039.59	182.922	390.46	2306.75	-2348.75	-186.415	-1727.65	-2276.75	-1658.98	-221.803	-5005.36	3416.24	-622.828	-853.753	2954.12	-3220.79	-4540.97	947.31	-4452.88	954.71	-2899.01	-3971.97	-2120.63	-4342.52	737.56	-2434.54	-2774.18	1713.22
20	fret	0.273606	0.281401	0.263545	0.22743	0.241037	0.31781	0.289171	0.31562
21	donor	53949.9	65342.9	60905.5	58914.5	67198.3	63120.2	40718.4	61577.2	58331.4	56326.2	58551.2	67931.7	67407.4	19299.7	11549.2	-1201.98	137.041	-481.057	1347.25	-478.797	475.469	-1346.05	37.6029	-1109.32	-2362.47	-2113.87	-3429.73	-1171.47	-2435.35	-1642.67	1744.43	803.162	-2642.7	-1911.61	-1138.7	204.274	1346.12	1196.96	885.085	1643.3	2457.45	2907.74	-4113.37	-884.458	287.327	441.004	1833.7	1652.9
21	acceptor	35584.8	26248	32995.1	23523.7	28665.1	24807.7	52245.2	29824.4	24706.3	28669.4	32882.5	21148.8	25448.1	72916.4	23242.3	5457.45	4547.49	2278.22	3529.34	2954.82	6507.16	8807.41	6378	5304.89	4067.51	2126.12	3505.68	5033.99	4209.53	1069.03	731.461	4357.43	1559.03	4915.98	2980.66	6393.32	2019.36	4776.31	2901.06	5497.02	4910.36	4098.95	5435.52	6070.57	2716.19	4428.05	3121.29	4138.52
21	fret	0.396972	0.28654	0.351156	0.28551	0.298893	0.282419	0.56161	0.326606	0.297865	0.336845	0.359324	0.236936	0.27417	0.790353
22	donor	122164	229885	294137	271202	318831	294670	302574	285564	346008	317462	291101	288289	306771	293518	289487	250528	231476	276129	258629	243791	229883	263499	284143	255088	218789	296344	267344	302791	261960	272420	256397	285011	331032	221843	230731	280346	278687	291081	282735	273423	297872	243842	222695	244097	244320	229050	248299	271860
22	acceptor	75181.5	48269.7	23798.8	24903.9	15574.1	-1431.59	-403.156	3994.05	4692.06	3061.69	254.487	1155.59	-1466.55	-7.158	-1740.57	-4685.81	698.763	-6370.08	-6425.96	-1812.47	91.949	-1206.99	4247.21	-6464.7	1477.59	-2742.9	-2082.49	3108.08	-4036.17	-1122	-1790.02	3117.13	3.46	-6315.59	-6532.12	2752.26	3246.48	1840.43	-2327.52	-1422.52	5462.54	-1786.25	-2945.79	-1967.92	-2245.16	1572.51	-3611.37	1011.08
22	fret	0.380782	0.173246	0.0748067
23	donor	58255.7	55179.4	51812.8	55585.6	60272.3	63421.3	63455.8	54626.1	58391.8	52115.7	51105.4	55397.7	52291.8	67619.8	57733.7	59541.4	58682.1	67135.4	58815.2	55363.3	41338.3	47709.1	66837.2	62310.1	57944.2	56697.6	55116	56518.4	62343	50023.1	66837.2	46818.5	58111.7	55808.6	47854.7	48962.8	2864.5	5129.23	54747.4	56106.7	60992.3	57795.5	56646.7	60261.4	49656.1	60412.4	49498	59424.8
23	acceptor	16308.5	21560.6	25745.3	25571.6	14214.8	19313.5	18620.9	16272.4	14392	15228.4	32080	18294.8	22872.4	14146.6	18320	13078.2	19055.4	13173.5	28623.3	20570.8	47453.1	29920.8	30231.5	22431	25856.4	28554.1	23812.6	22515.1	17028	25792.7	10500.3	38518.7	24453.9	21856.6	28918.3	31803.4	92803	96561.9	13237.7	24809.2	20152.8	18286.8	15204.5	20920.3	18497.6	22661.4	22283	26706.6
23	fret	0.218751	0.280984	0.331505	0.314651	0.191153	0.233551	0.226643	0.229603	0.198049	0.225656	0.386131	0.248362	0.304743	0.173432	0.240461	0.180321	0.245399	0.163593	0.327538	0.271093	0.534862	0.385136	0.311678	0.265161	0.308706	0.334481	0.301772	0.284942	0.214806	0.340433	0.136071	0.450879	0.29583	0.280984	0.376188	0.394089	0.970297	0.949836	0.195093	0.306724	0.248362	0.240461	0.211848	0.257254	0.271093	0.273071	0.310687	0.309696
24	donor	32545.2	29251	30417.1	31606	33574.1	31640.7	43896.4	46919.9	43153.8	42874	44621.7	50908.2	46025.5	45008.5	47100.1	54014	54308.4	49434	52358.6	51371.9	42686.5	46961	48154.5	51921.5	52794	50423.5	51007	50073.2	53575	48181	57658.4	50633.8	47716.5	50356.7	46880.6	47878.3	48461.8	46152.6	48652.9	47609.5	46276.1	47193.3	49159.6	47924.1	53099.4	43036.8	52401.6	50439.9
24	acceptor	14748	13007.3	15341.3	17656.7	16871.8	17924.9	2613.74	-3064.61	-797.532	-4551.04	-6121.6	3793.21	1046.02	-2497.47	-673.259	735.222	3655.85	-2901.58	-2550.34	-4142.47	-4926.69	-1860.68	170.902	-227.859	-6917.33	-1397.93	7258.44	333.251	287.556	1030.3	-6617.2	4274.88	-1100.12	-3467.66	-1131.63	1364.27	-5103.06	-1919.11	-1028.78	963.794	-1752.96	-2867.74	2201.57	1259.59	-3971.26	-7265.47	-3421.26	-3107.78
24	fret	0.311306	0.307395	0.335743	0.358368	0.334471
25	donor	40008.1	30433.6	43763.6	28095	37130.3	34630.4	35518.6	38818	41815.6	41005.7	44119.6	44451.4	39531.1	36936.8	41966.5	46314.2	33616.6	36540.5	39936.6	34706.5	31835.6	39685.5	30456.6	33036	39790.3	25137.8	29288.5	38594.5	35714.5	35662.6	30677.8	30630.6	39205.1	34125.8	37124.5	32847.1	41768.3	48907.4	44699.1	33069.4	18971	24377.4	20747.4	24478.8	18774	28425.6	30894.4	30861
25	acceptor	23874.3	14820.5	13232.7	37077.1	12540.1	19756.8	5253.51	13058.2	5908.88	9068.73	7181.17	16378.1	15234.1	1894.8	9125.01	8367.82	8510.76	1935.64	14570.1	15607	2888.5	4578.59	16469.1	14238.8	6580.85	23578.7	28672.9	4223.74	11796	24827.5	14627.3	4463.21	11546.2	16040.6	11083.1	28968.2	19497.8	9683.38	7516.27	19570.3	38487.6	14991.4	26630.2	23539.9	29574.3	21682	10905.1	13385.5
25	fret	0.373223	0.327787	0.232824	0.569193	0.252406	0.363799	0.128708	0.25111	0.124414	0.180445	0.140064	0.269133	0.278048	0.0493358	0.179073	0.152731	0.202194	0.0508491	0.267854	0.310607	0.0837183	0.102768	0.35072	0.30068	0.141477	0.483978	0.494596	0.0983961	0.248527	0.410186	0.322903	0.127273	0.22755	0.319227	0.230189	0.468945	0.317999	0.165276	0.1443	0.372049	0.670076	0.380242	0.562254	0.490361	0.611824	0.432711	0.261441	0.301926
26	donor	44716.1	47375.7	57138.2	51033	59195.5	54323.6	44320.6	47381.6	58730.4	42471	49160.6	47994.8	44792.7	47568.5	50229	57121.3	51407.7	43985.7	45614.6	48831.7	68460.1	55881	63214.6	67251.6	60012.4	40901.8	20709.8	45775.6	47807	44993.4	53856.5	43395.3	56045	53485.8	40625.5	37541.6	49600.9	32966.9	45457.5	55282.7	48481.8	51544.9	52845.8	50321.4	45675.2	47081.5	55750.8	42907.3
26	acceptor	22433.8	22872.7	29561.5	20452.1	16035.5	26612.3	26548.9	26044.7	17433.7	31754.5	23219.7	20447.5	24774.7	17044.9	21010	17066.7	8108.26	24900.7	20745.2	16780.8	6984.22	15509.1	13718.1	7756.57	8846.38	34482.4	56537.5	20847.4	15960.4	20738.3	15176.4	21374.6	14372	22419.2	28605.6	24266.3	18437.4	37113.3	32783.9	19322.5	25485	25259.1	25255	20515.7	19227.3	22350	15955.2	22429.7
26	fret	0.334043	0.325116	0.340721	0.285567	0.213472	0.328469	0.374796	0.355079	0.22881	0.427451	0.320637	0.299218	0.35618	0.263755	0.294679	0.229985	0.136188	0.361675	0.312774	0.255657	0.0926307	0.217029	0.178829	0.103921	0.128787	0.457931	0.732104	0.312774	0.249852	0.315024	0.219386	0.329585	0.203974	0.295815	0.413636	0.392152	0.270669	0.529496	0.418955	0.259131	0.344047	0.328469	0.322878	0.290128	0.295815	0.321758	0.222925	0.342939
27	donor	28383.5	29495	51812.3	54713.1	44304.5	31484.7	26212.4	23844.2	25645.9	30574.4	32193	34633.8	29907.3	46860.7	41105.1	40180.7	56154.5	58218.4	58475.7	64419.2	63231.9	55658.9	54366	53743.4	57087.9	62486.4	56850.4	64955.2	68191.7	50117.7	54163.1	68129.9	72647.7	76190.9	73641.3	68042.4	67868.5	70202	64740	67484.2	66000	71969.9	68119.1	62192.9	75682.2	66873.2	62403.2	59409.9
27	acceptor	40673.8	57287.1	16291.6	7981.73	19837	20658.9	30000.5	33903	43058.6	37593.5	38242.5	30595.2	40408.8	922.893	4849.3	2513.75	-1549.62	-156.901	-5875.74	-4763.46	-2129.7	-2782.23	-2957.68	-3061.53	-785.499	-2035.23	-2897.4	-610.776	-509.193	-2361.12	-5132.66	-1205.38	20.73	-1935.61	-3219.02	-4440.04	-2296.65	-1456.1	-2719.57	-1497.55	-3745.48	-3671.96	-1527.81	-424.889	-1945.51	-1621.63	-665.41	-2611.75
27	fret	0.589081	0.659794	0.239583	0.127718	0.309806	0.395891	0.533729	0.587143	0.626315	0.55177	0.54278	0.468635	0.574477
28	donor	30626.4	24783	30830.8	69468	68540.5	52905.4	61631.9	66895.5	64010.5	58020.9	36844.3	32632.5	46788.8	53692.6	43247.5	55411.1	53765.2	42580.8	60284	51720.9	30957.9	42198.6	47009.4	39690.1	43090.9	44290.7	69296.1	108016	60293.5	44522.8	41141.2	42225.4	39073.9	45381.6	40633.9	38678.4	57537.6	60573.4	56174.4	55030.9	56609	55571.6	57263.4	64680.2	62353.1	67500.2	69714.5	72568.9
28	acceptor	43425.7	39598.2	55347.9	16799.4	26719.8	27526	14178.3	18762	12259.8	23068.8	33154.7	38587.8	37740.4	32087.7	35125.3	22931.1	22268.7	28059.6	19992	30813	54672.6	32775.2	34817.5	42546.6	39689.1	37465.3	28330.4	37310.2	41425.8	48094.4	38083.3	51091.2	45854.6	38925.5	30994.5	37094.6	33612.7	29255.4	17512.7	19505.9	23789.4	28870	17892.1	21670.8	20609.7	14517.5	15853.1	15026.5
28	fret	0.586783	0.614793	0.642237	0.194698	0.280282	0.341889	0.186637	0.219224	0.160434	0.284642	0.473136	0.542077	0.445984	0.374375	0.447977	0.292529	0.292529	0.397154	0.249357	0.373434	0.638776	0.437054	0.425245	0.517644	0.479272	0.457989	0.289894	0.257012	0.407735	0.519751	0.480294	0.54745	0.539935	0.462016	0.433106	0.489531	0.368744	0.325513	0.237546	0.261287	0.296052	0.341889	0.238385	0.251054	0.248509	0.177039	0.185032	0.171477
29	donor	49744.9	48284.8	52754.9	44349.2	46612.6	44131.3	48112.9	50808.6	49591	53678.3	51370.3	43643.6	45725.1	51387.6	60672.9	48236.6	54696.1	42226.8	51992.5	50553.3	45958.8	46847.8	51185.5	46264.5	49552.8	48013	44859.9	48598.4	46396.1	50653.3	52913.1	45485.6	49550	52595.2	45159.1	43441.5	42911.5	48578.3	38538.5	49363.7	53754.6	48340.2	53377.7	51539.4	45192.1	47148.5	51772.4	46698.9
29	acceptor	26443.3	21498.7	6972.6	31093.1	39215.2	30989.4	19408.6	28527.8	20533.3	22689.5	18822.5	25455.8	27992.3	33527.8	22097.2	19828.6	28254.5	27672.3	13338	20749.4	21023.3	21389	25517.9	30499.4	23244.9	25051	30143.6	22572.2	22371.4	6754.01	28378.4	13141.2	18807.2	28143.8	26966.6	20994.7	27155.2	33038.6	20935.2	19072.1	21488.6	23839.9	23829.9	38159.7	17582.9	21309.5	24269.8	25026.4
29	fret	0.347389	0.308592	0.116529	0.412598	0.456498	0.412598	0.287457	0.359892	0.29275	0.29698	0.268344	0.368206	0.37961	0.395107	0.26728	0.291692	0.341122	0.396138	0.203973	0.290634	0.313853	0.313853	0.332751	0.397169	0.319112	0.343212	0.402319	0.317009	0.325413	0.117634	0.349475	0.224468	0.274725	0.348432	0.373398	0.325413	0.387882	0.404377	0.351561	0.278974	0.285338	0.330656	0.308592	0.425922	0.280035	0.311752	0.319112	0.348432
30	donor	91872.1	68621.3	109460	94456.7	64399.1	93655.2	65750.5	89187.3	78709.3	85411.1	90265.5	82862.3	97241.6	95630.3	76860.6	18637.1	11533.3	78392	98786.2	74021.9	82421	89181.3	75917.1	95586.2	89647.6	100528	80758.4	95613.6	131099	58036	37001.3	62110.3	83583.9	100176	86627.7	49684.6	102307	63774.1	79559.7	51396.2	71259.6	82016.7	62245.1	82218.2	106774	81305.8	74810.3	55249.8
30	acceptor	14574.3	33879.7	27869.3	20436.8	53146.5	28730.7	38458.4	33961.1	33550.5	24906.5	28782.2	35013	24879.9	29066.3	25423.5	63836.4	72208.8	28261.2	24239.1	26243.3	20716.6	18101.7	39670.4	22885.3	28019.2	25012.1	32195.7	24700.5	7235.12	52862.1	71742.5	45256.3	33941.1	17982.1	31700.7	50561.8	20020.2	48051.7	52205.4	56506	41955.8	37452.3	34566.3	31128.1	19969.4	31478.5	35384.2	48971.6
30	fret	0.136884	0.330173	0.202594	0.177859	0.451943	0.234694	0.369518	0.275474	0.298964	0.225958	0.241716	0.297145	0.203454	0.232937	0.248768	0.77427	0.862292	0.264741	0.197446	0.262069	0.200876	0.168572	0.34318	0.193168	0.238202	0.19916	0.285365	0.205174	0.0524162	0.476928	0.659852	0.421436	0.288979	0.15182	0.268311	0.504293	0.163528	0.429259	0.396248	0.523823	0.370466	0.31358	0.357245	0.274577	0.157664	0.279067	0.320935	0.469897
31	donor	43932.6	28935.8	34767.1	41126.5	47129	51125.1	21686.9	40308.1	21200.5	27029.6	32904.7	51486.3	60729	47701.1	39560.7	42932.5	57083.7	55302.8	57687.1	48930.8	45333.5	52302.6	49667.8	48715.7	40717.3	34140.7	43671.6	40498.1	54607.5	50329.6	36838.2	73180.7	56248.6	56666.1	39811.2	40773.7	41625.5	43917.9	34076	34021.7	41241.4	30311.7	44636.2	43003.5	43406.4	19008.3	38312.2	28478.6
31	acceptor	1723.62	8764.11	11817.9	5054.7	3161.23	7436.06	17926.5	21687.1	19311.8	14489.1	13883.5	-6472.26	896.374	5756.96	7237.25	-8296.59	1536.04	-361.042	2392.71	-1330.33	-1127.37	-8360.62	-3601.79	5684.32	23097.2	19660.9	14370.5	7548.15	-2260.6	-5419	3161.29	-9908.33	2046.03	7123.01	19405.7	12497.2	7116.43	13082.6	8076.43	8478.09	9705.17	11044.7	13668.6	21968	4846.73	8461.04	14697.5	15442.5
31	fret	0.0375707	0.232348	0.253586	0.109836	0.0626108	0.126641	0.452972	0.349692	0.476858	0.348734	0.296542	-0.143786	0.0144563	0.108073	0.154273	-0.239486	0.0264178	-0.00677718	0.0401508	-0.0278503	-0.0253299	-0.190082	-0.0777822	0.10455	0.362168	0.365055	0.248033	0.156961	-0.0429253	-0.120336	0.0791376	-0.156635	0.0349931	0.1116	0.327747	0.234189	0.146223	0.229589	0.191232	0.199408	0.190325	0.267527	0.234189	0.338222	0.100152	0.307846	0.276855	0.351608
32	donor	27280	25808	29361	28974.4	27515	29649.7	31238.4	25962.6	27830.6	38683.6	26563.7	25487.7	28341.8	29640.2	31847.4	30582.1	25009.7	31027	31587.1	28554.8	29241.1	36706.7	34124	25749.6	29768	30358.1	32162.9	23316.8	24575.8	28278.7	21324.2	28562.6	25822.2	27543.4	23805.9	14718.3	21769.1	25891.6	29436.7	27655.5	28603.7	33548.2	28367	21819.6	30239.7	33791.1	27404.6	26693.1
32	acceptor	11930.5	15572.6	21911.6	18822.5	15341.9	10550.7	8152.05	17154.2	20671.3	8826.55	16628.3	24358.6	12183.5	12652	10810.2	30041.9	18758.1	23412.4	18158.6	16325	20947.2	15492.7	21245.1	13209	15479.6	21162.7	24604.1	10644.2	15860	23080.2	26466	7168.23	23997.5	21301.9	18529.6	20663.5	14296.2	11850.9	13266.6	14411.4	17401.6	15078.4	13526.1	7917.05	20354.1	20664.9	20630.7	21347.2
32	fret	0.303934	0.376702	0.427444	0.393355	0.357869	0.262109	0.206635	0.397505	0.426416	0.185739	0.385039	0.48855	0.300735	0.299668	0.253466	0.495607	0.428471	0.430526	0.365205	0.364158	0.41715	0.296465	0.384003	0.33893	0.342094	0.410959	0.433605	0.313519	0.392316	0.448958	0.553506	0.201148	0.481478	0.435656	0.437706	0.58404	0.396468	0.313519	0.310324	0.342094	0.377745	0.310324	0.323068	0.266422	0.402686	0.379836	0.429499	0.444878
33	donor	-1857.87	3700.32	-839.118	6424.33	840.712	2347.64	4352.93	3435.89	3373.17	21971.7	5712.39	2444.26	-962.86	5224.21	4875.02	1764.53	859.358	-3566.51	3144.33	3181.63	-311.947	3705.41	-184.815	4485.15	-1390.02	630.522	3210.44	-1615.47	1801.83	130.471	44719.7	21308.9	2822.27	-2086.7	3468.1	864.443	6092.09	1845.9	754.263	-2673.2	-2517.25	-722.157	932.247	-1645.98	-196.681	-1232.38	816.981	-281.435
33	acceptor	46547.5	47438.5	54383.1	49797.6	54933.8	50409.8	47042	37099.8	43518.4	25350	42182.1	52728.4	39338.3	41132.8	51196.4	58973.8	47452.2	40988.4	34252.1	38658.5	48615.7	56268.8	37199.3	36548	43559.2	39698.2	45814.5	37038.8	50185.1	44184.5	6952.53	4663.09	-611.695	2182.57	2251.28	-1680.56	-1332.52	-883.911	3179.99	-2592.82	-1978.82	-1216.96	-1095.09	270.516	-2145.13	-4598.19	-816.859	-1428.03
33	fret	1.04162	0.9271	1.01613	0.885583	0.985079	0.955411	0.915834	0.91471	0.928228	0.535455	0.881122	0.955411	1.02538	0.887816	0.913585	0.971357	0.981644	1.09547	0.915834	0.923717	1.00691	0.938399	1.0046	0.891167	1.0335	0.983934	0.935006	1.04511	0.965655	0.996552
34	donor	44894.9	46137.7	55094.1	43204.2	50480.1	42127.5	43433.2	47139	41689.7	35173.7	39961.3	43926.3	45694.9	47996.9	43020.6	48032.2	49649.8	39714.8	39928.6	42041.9	44620.7	46100	44920.1	42062	37941.1	47508.9	48442.2	38877	36570	45159.1	38643	52721.7	35057.9	56563.4	48492.6	46927.7	47971.8	56342	42160.2	38555	53061.3	42192.9	50155.5	38967.6	41269.6	46386.8	53476.5	36849.2
34	acceptor	13988.4	14575.7	13860.3	18930.3	10046.4	17745.1	18418.3	9347.35	14728.8	20040.1	8346.05	16901.5	19879	9106.31	13157.8	14389.6	17823	10292.4	13773.7	14404.8	18639.1	13849.5	20425.6	18377.7	15281.6	12705	25644	21979.8	14981.4	12068.3	14548.4	13389	17177.5	23541.5	12112.1	17021	7286.48	11378.1	9678.7	10764.3	7441.05	15465.4	20964.8	16370.9	18668.1	14238.9	15063.6	14317.1
34	fret	0.23745	0.240303	0.201458	0.304454	0.165731	0.29675	0.297712	0.165731	0.261275	0.362622	0.17323	0.277542	0.30349	0.159176	0.234599	0.2308	0.264139	0.206179	0.256501	0.255547	0.294826	0.2308	0.31217	0.304454	0.287137	0.210904	0.346071	0.361647	0.29098	0.210904	0.27371	0.202402	0.328607	0.293864	0.199571	0.266051	0.132125	0.167604	0.186383	0.218474	0.122831	0.267967	0.294826	0.295788	0.311205	0.234599	0.219421	0.27946
35	donor	25011.7	31008.3	33854	22100.9	21505.7	22157.5	13366.7	26058.1	21601.8	26128.4	22270.7	29498.9	27980.9	25761.3	18769.9	22406.2	14203.8	25797.3	18564	17296.4	22927.7	27073.5	23147.2	16593.2	16552	13783.6	23941.4	16020.3	11600	10226.1	9653.18	4049.38	6066.54	6975.64	10172.9	10032.3	14440.5	20706.4	13980.8	9207.21	23092.3	30473.2	17202.1	19615.5	19100.9	26073.5	7462.77	27387.4
35	acceptor	10924.8	13681.5	9734.72	19064.4	16508	17872.5	25028.9	13448.5	14639.5	18069.6	18671.1	15851.2	14244.4	14947.8	27177.5	16189.8	27141.3	17108.4	8118.02	30279.6	22976.6	8765.94	12853.4	27784.8	24554.8	20860.2	12366.5	28220.8	25802.1	28051.4	27214.4	32536.9	24542.6	30135.5	19625.8	27362.9	19802.8	18224.5	22461.8	21251.2	19684.1	6286.18	20710.8	11552.7	14315.9	20958.7	29462.4	16533.9
35	fret	0.303689	0.305819	0.222842	0.462936	0.434345	0.446628	0.651694	0.340779	0.403442	0.408612	0.455811	0.349201	0.337615	0.367028	0.591593	0.419959	0.656493	0.398263	0.304754	0.636289	0.500347	0.244586	0.356553	0.625656	0.597457	0.602345	0.340779	0.638219	0.689892	0.733272	0.737952	0.88958	0.801855	0.811926	0.658411	0.731398	0.577869	0.468016	0.61596	0.697478	0.459884	0.171204	0.546283	0.370165	0.428187	0.445613	0.798185	0.376429
36	donor	29411	23227	28179.4	28482.6	23948.6	26804.4	26945.4	28722.3	34556.1	34831.1	23678.3	24519.7	21553.5	26802	23619.5	28783.4	32894.3	20293.7	34542	22162.2	33225.7	32396	20914.2	22185.8	22961.4	29434.5	30414.6	26294.3	23408	24630.2	22394.9	21457.1	27721	29592	33110.6	31890.7	32605.2	33834.5	37783.2	35214.2	31110.4	31606.3	26150.9	25582.1	34452.7	26512.9	32856.7	28950.3
36	acceptor	11881.5	8239.9	3338.1	2719.92	1062.51	8812.15	6153.5	11461.6	3887.16	3224.18	9973.79	9981.93	-499.84	3473.97	4972.88	8216.39	7289.44	6555.68	1174.79	5503.39	-6028.41	3344.81	8184.13	7197.75	972.148	7622.16	3899.19	-844.062	3169.3	-1319.25	19118.4	8469.15	-393.627	5261.5	-4968.41	3156.47	-3155.55	185.472	-5689.51	9146.26	-2929.6	3781.42	-3978.15	628.314	-1353.98	11339.1	1713.03	95.281
36	fret	0.287564	0.261575	0.105589	0.0872702	0.0421806	0.247408	0.185647	0.285406	0.101021	0.084973	0.296179	0.28972	-0.0236698	0.11471	0.173374	0.222187	0.181189	0.24413	0.032854	0.198986	-0.22186	0.0941519	0.281087	0.245223	0.0410163	0.20563	0.113571	-0.0331854	0.11926	-0.057095	0.460607	0.283247	-0.0141814	0.150937	-0.176797	0.0895657	-0.106654	0.00589095	-0.176797	0.20563	-0.104218	0.106731	-0.179284	0.0235007	-0.0403402	0.299404	0.0491582	0.00353583
37	donor	74290.3	80169.7	64847.9	77903.7	76314.2	67570.4	62669.1	64322.2	55067.3	73797.1	75936.8	49856.2	52200.5	68917	59404.5	70997.2	60101.5	60434	72788.8	67988.6	73033.3	58513.6	87456.1	73555.8	76448.7	73793	84996.9	81328	88999.1	83594.1	85935.9	76038.7	84216	81972	83928.2	93533.6	78897.3	76457.7	83835.3	85120	78241.2	74608.2	96652.3	100526	76989.1	73168.7	71658.2	73374.1
37	acceptor	8161.9	9022.82	16296.3	13995	11072.6	21866	16077.4	17004.3	25627.5	16452.3	15093.1	6282.21	28444.9	16579.9	6007.89	3078.43	11042.9	3842.66	-1592.34	-510.591	-1721.6	-4847.63	-6308.6	344.011	-1903.88	-4986.69	-2384.07	1526.29	-1845.66	-5090.17	-3439.8	-2799.72	-883.031	-1650.92	-7461.41	-659.836	-5533.92	-3937.53	-5062.67	-261.912	327.868	-6054.18	-1850.26	-5028.65	-1571.87	818.179	-720.869	976.772
37	fret	0.098531	0.100657	0.200893	0.152544	0.127179	0.244739	0.204035	0.209267	0.317185	0.182015	0.166243	0.11234	0.353116	0.193558
38	donor	50604.2	57862.7	48044.2	58085.2	56763.9	67082.9	56768.9	57350.4	53022.5	56211.1	57640.2	59509.2	47867.2	58083.5	58570.5	55774.6	58100.3	60068.7	58054.8	56061.1	53039.4	56698.2	59473.8	53989.9	52739.4	61570.3	50708.6	52867.5	58924.4	58995.2	59064.3	58412.1	56051	50396.9	60296.2	59682.8	53563.5	52228.8	56554.9	55764.5	46650.5	59782.2	60436.1	63173	47139.2	54003.4	53721.9	55344.9
38	acceptor	27826.1	28539.7	26643.2	26473.1	22656.1	22228.5	23608.7	24187.1	25460.1	24442.7	25628.8	29022.9	22972.4	23403.4	29297.5	30036.5	30159.8	18850.3	20837.4	26010.6	21557.1	14158.9	16165.8	16078.8	14314.9	17715.2	23421.9	18727.9	16049.4	11699.8	14019.5	14505.2	12337.8	23488.9	13416.1	9756.96	11550.4	21966.9	25766.2	20039.9	21492.4	21239.9	25071.2	14400.9	18070.6	19335.6	17612.2	12851.6
38	fret	0.354979	0.330213	0.356962	0.313394	0.285729	0.249244	0.293628	0.296592	0.324275	0.303508	0.307462	0.328233	0.324275	0.286716	0.333183	0.350023	0.342095	0.238413	0.264025	0.31735	0.288691	0.200069	0.213823	0.229556	0.213823	0.223654	0.316361	0.262053	0.213823	0.165736	0.192215	0.199087	0.180441	0.318339	0.182403	0.140278	0.177499	0.295604	0.313394	0.264025	0.315372	0.262053	0.293628	0.185346	0.276846	0.264025	0.247274	0.18829
39	donor	113914	84343.5	95076	86907.3	113332	89401	90510.3	87865.9	96201.2	112060	110832	110058	103407	96734	91043.2	111067	104150	99645.6	99902.1	91870.9	97388.5	107768	92394.5	94749.4	107506	101932	92670.8	96812	88154.1	93441.7	103395	101302	84958.3	101208	99111.4	101130	89055.9	92846.7	92242.4	101846	92606.1	97352.8	94299.8	78135.7	90165.2	100955	82261	103644
39	acceptor	20190.9	12949.7	12900	20343.4	13750.4	17675.3	11214	19482.6	17687.1	14230	5146.82	5507.24	21411	17181.7	15888.8	16554.6	14737.4	11923.4	16559.3	13314.5	21742	20776.7	24759.8	19584.5	29172.7	28297.6	23021.6	26449.7	23674.1	16017.9	20854.3	10691.1	12702.2	16505.7	19867.9	21333.5	15778	15208.4	20559.5	14076.3	16723.3	8487.46	17707.3	12698.4	17611.2	16032.2	12678.4	21627
39	fret	0.150235	0.133065	0.119728	0.189477	0.107982	0.164826	0.110037	0.181184	0.155312	0.112797	0.0441436	0.0479422	0.171479	0.150958	0.14879	0.129534	0.123916	0.106611	0.14232	0.12672	0.182687	0.161887	0.210999	0.171479	0.213337	0.217249	0.198638	0.2149	0.211778	0.146628	0.167776	0.095732	0.130239	0.140175	0.167038	0.174453	0.150235	0.140889	0.181935	0.121122	0.153132	0.0803536	0.158228	0.139461	0.163355	0.137323	0.133773	0.172964
40	donor	55020.6	52727.6	58652.3	65645.1	55777.9	57835.9	61288	65664.8	64776.4	57907.3	54127.9	48478.8	54123.6	57671	42750.9	51735.8	41582.6	62011.5	63155.3	66403.1	73593.4	57170.2	67245.4	70866	72682.8	74704.5	74919.8	82106.4	78303	76886.8	67049.1	73722	78345.5	74805.4	75677.8	71571.1	82217.8	93173.3	83783	67812.6	68747.8	69559.9	61454.7	66572.9	62034.3	67620.7	61006.9	69593.1
40	acceptor	34616.6	26344.5	27636.3	39824.6	24864.4	35051.5	23619.8	21717.4	29986.8	17931.3	22127.4	40423.1	32521.3	32783.3	29882.2	36752.2	36007.6	26487.3	11761.3	23134.8	9362.7	16328.4	15638.7	13415.3	11525.9	8744.48	4546.09	9273.93	14067.5	8778.02	12168.8	2633.78	5944.7	11940.4	8240.73	9530.07	6587.21	-1744.47	8278.39	10480.3	15281.2	13995.1	14208.4	10137	19608	20505.5	17024.2	11135.7
40	fret	0.386603	0.33314	0.320729	0.377387	0.308289	0.377387	0.278111	0.248816	0.316585	0.236214	0.290618	0.454729	0.375337	0.361993	0.411104	0.415177	0.463816	0.298941	0.156797	0.258249	0.112902	0.222529	0.1887	0.15893	0.136498	0.104297	0.0567329	0.101067	0.152532	0.102144	0.153599	0.0349797	0.0708277	0.137569	0.0978346	0.1172	0.0740754	-0.018671	0.0902857	0.134357	0.182334	0.167452	0.187641	0.132215	0.240418	0.233059	0.218311	0.137569
41	donor	37548.1	21476.9	19585.2	34271.5	29565.3	36327.3	37210.4	34970.4	32880.6	40499.9	32438.5	39741.1	37142.3	37957.4	34443.9	38763.1	38390.1	29899.5	43207.8	31976.4	33389.6	33106.9	41823.9	32507.7	39830.3	35278.9	36238.2	32232.1	30637.1	35468.8	29686.1	39093.8	37083.7	37896.4	40830.6	35912.1	31968.2	36799.9	51948.2	14777	24652.6	33078.8	34163.6	40070.7	32153.5	31895.5	45599	33316.9
41	acceptor	27882.6	49337.9	48856.9	19773.2	19650.1	15625.6	17666.6	23794.6	15198.1	19965.1	16188.8	13858.4	15518.6	13962.5	15694.1	19021.6	13122.7	16469.8	13954.9	19070.3	22549.2	22327.1	18264.8	21168.9	14199.7	16760.3	18515.2	24088.4	19415.2	22609.9	21557.1	20429.7	15449.4	16406.6	19838.5	17211	15378.6	11476.1	14875.6	37067.4	17748.9	24031.4	11093.4	13860.1	22130.2	19004.1	15746.7	14646
41	fret	0.425943	0.696271	0.7136	0.365577	0.399429	0.300326	0.322168	0.404538	0.315937	0.330465	0.332537	0.258465	0.295112	0.268962	0.312819	0.329429	0.25426	0.355275	0.243733	0.373804	0.403517	0.402495	0.303455	0.394314	0.262666	0.322168	0.337714	0.427977	0.38817	0.389194	0.420855	0.342885	0.294068	0.302413	0.327355	0.324244	0.325281	0.237407	0.222615	0.71456	0.418818	0.420855	0.244787	0.257414	0.407602	0.373804	0.256363	0.305538
42	donor	11605.8	34623.2	25229.6	25883.7	13449.2	19517.8	17160.7	14433.7	3399.85	1421.03	-1102.88	28754.5	20890.4	37687.3	21032.5	25191.6	27272.9	35249.3	27591.7	27092.8	16125.1	14377.5	-1396.89	30204.8	26518	20903.6	18743.1	14171	10723.8	22684.3	12269.8	17354	18642.4	22073.1	20459.3	29874.4	19810.2	10421.5	22520.7	25125.6	-3101.52	13284	25963	40838.9	21846.8	19071.8	38475.2	40369.8
42	acceptor	35691.4	14679.1	18369.5	13800	24858.1	14017.4	15375.4	30233.5	49045.6	48372.1	38568.9	25825.6	16108.8	11117.9	16942.5	11441	11816.1	507.194	3161.09	12766.8	12507.2	20380.7	35489.5	15841.3	27534.4	7231.67	17958.2	28885.6	27175.3	17919.5	32038.1	22936.3	12145.2	14148.8	16304	12766.9	22950.5	16979.3	17505.4	19957.4	50615.1	46477.2	16840.9	14760.1	28875.2	27754.3	20422	15883.1
42	fret	0.7546	0.29742	0.420962	0.348038	0.649309	0.418016	0.472437	0.676666	0.934847	0.971285	1.02894	0.473434	0.435733	0.227979	0.446605	0.312618	0.302164	0.0139064	0.103075	0.320249	0.43672	0.585934	1.04057	0.344192	0.509529	0.256893	0.489431	0.671389	0.717025	0.441659	0.723439	0.569495	0.394532	0.390634	0.443636	0.299317	0.536838	0.620079	0.437707	0.442648	1.06513	0.777333	0.393557	0.265339	0.569495	0.59315	0.347076	0.282285
43	donor	32734.5	34654.3	34409.4	33749.5	30578.4	30221.2	30592.3	31310	33867.1	37261.7	32699.2	33610.4	29028.7	34486.4	36482.1	44046.6	42053.1	43307.6	52292.5	53853.9	50347	34267.1	46309.7	42562.2	41650.9	34669.2	40553.6	43737.5	41211.4	45850.9	44691.5	34754.8	48415.5	36702.4	43210.3	45592.1	46942.8	47848.7	31774.1	23257.7	34641.4	26690.8	32559.1	39380.4	37636	42145.1	42152.5	38105.6
43	acceptor	1620.11	2187.63	20.928	459.213	9517.04	5534.36	1585.92	2176.97	2934.66	6129.39	2279.82	5785.11	18954.2	21861.6	18851.7	13003.8	4529.49	6837.83	8070.72	9307.92	11341.2	28215.4	17345.3	14180	3853.47	10862.9	9649.95	6470.12	19579.1	645.888	2012.21	993.513	-144.402	22010.1	10616.1	12121.5	10919.4	3112.25	26356.4	30307.3	19310.6	20224	16264.6	9175.64	8404.14	3081.96	9312.23	18980.3
43	fret	0.047042	0.0592848	0	0.013969	0.237836	0.154154	0.0497697	0.0646947	0.0794906	0.141293	0.0646947	0.14645	0.395392	0.387656	0.340419	0.228074	0.0968162	0.136121	0.133529	0.147736	0.183363	0.451666	0.272766	0.249966	0.0848392	0.239053	0.192151	0.128332	0.322042	0.013969	0.0429424	0.0278265	-0.00280731	0.375422	0.197152	0.209588	0.188398	0.0606371	0.453789	0.56617	0.357467	0.431343	0.333553	0.188398	0.182104	0.0687427	0.180843	0.332405
44	donor	57517.5	48401.8	48283.5	75311	54707.7	51931.1	57262.8	54732.2	80835.4	89114.1	87529.5	88526	84413.8	83518.3	81375.2	82663.2	86097.2	85614.5	89411.4	90464.9	77169.8	-2345.54	-3957.56	-107.922	-1821.68	295.442	595.621	-1955.89	-395.832	-2175.25	-4321.96	-5913.04	-2720.05	-4082.39	1424.72	-1399.55	-1219.88	-1953	-184.409	681.488	2456.58	285.34	-4294.53	-1166.48	1620.99	-2923.53	-1865.69	3152.18
44	acceptor	31349.9	30108.9	25431.7	16630.8	31180.8	28670.3	28958.9	29320.4	2618.99	2235.72	-4670.15	-2626.47	416.25	-1984.29	2189.38	-2580.47	522.862	-3074.13	-3398.29	-667.168	-439.909	-2212.7	-1621.8	-2256.85	80.361	-1380.29	-1565.08	-3569.57	415.086	2593.35	4497.75	-3794.33	914.383	1751.17	949.477	5.963	11.869	1964.42	1751.76	-939.522	-1213.96	-762.104	2334.62	-1888.35	-3502.02	360.095	-39.372	-1021.32
44	fret	0.352448	0.383089	0.344555	0.181089	0.363311	0.35541	0.33568
45	donor	29354.7	53372.8	40907.9	31140.8	23731.1	43632.4	38214.6	54597.3	45652.8	45604.3	38598.3	53055.6	31264.5	9926.11	9751.98	1450.57	18363.7	20531.6	43263	33662.5	42373.1	54791.9	52898.9	40123.7	32244	43588.2	40024.9	46720.6	36732.7	65085.2	50063.8	58401.3	55362.2	41607.5	34421.8	42072.7	27096.1	41316.5	45748	48152.1	33291.8	49199.4	49738.5	57822.3	46879.8	37952.1	39815.3	30018.3
45	acceptor	47250.3	25343.1	25002.5	35449.6	57367.2	32247.1	27384.5	12736.9	22437.4	25182.1	35266.2	22596.6	42558.4	55274.6	60916.9	77342.1	60173.5	55048.5	22768.1	37573.5	31799.4	15874.5	30027.7	30551.4	34285.8	22365.2	32605.9	27114.8	42288.7	22252.8	25310.9	19324.3	23563.1	23110.8	37966.3	24263.1	42495.4	17621.3	17077	19884.1	31223.3	24847.9	25947.5	21311.3	20188.6	29240.4	20574.4	27678.6
45	fret	0.617185	0.322094	0.379179	0.532248	0.707039	0.425225	0.417218	0.188766	0.329106	0.356149	0.47725	0.29905	0.576224	0.847648	0.861599	0.981093	0.7659	0.727994	0.345132	0.52725	0.428227	0.224873	0.362157	0.43223	0.515252	0.339122	0.44924	0.367164	0.535247	0.254951	0.336118	0.248936	0.29905	0.35715	0.52425	0.366163	0.610193	0.29905	0.271991	0.292035	0.484252	0.335116	0.343129	0.268984	0.301054	0.435232	0.341126	0.479251
46	donor	40022.3	33109.8	35518.2	43618.3	58104.9	50738.6	55058.2	57525.3	46381.3	53941.4	50234.9	55038.2	51387.2	50389.6	49479.2	42858.9	42000.2	51426.3	48878.2	50275	54354.7	47972.9	50561.1	46009	44494.7	44760.8	48500.8	48877.7	51849.4	48606.5	53878.9	49858	44725.4	54944.1	48648.5	49931.6	51661.1	53414	45182	53878.5	43646.7	49392.5	45284.9	45366	52125.7	49186.6	46212.1	48445.8
46	acceptor	30059.8	22773.1	23411.5	24995.8	2429.56	7090.15	2119.25	4180.78	5569.31	-2912.44	748.737	2697.73	689.623	2437.53	6018.38	4677.76	1892.44	-5098.94	7085.05	404.786	1664.11	230.748	785.728	1745.84	-1039.1	3615.47	1773.1	358.296	-680.955	-415.567	1104.11	3746.27	-3610.86	-1445.91	2120.03	14.093	-1928.98	-3335.68	3527.88	-406.161	4421.68	1211.95	3366.96	3459.69	3975.54	1581.03	-678.649	-1389.01
46	fret	0.42917	0.407093	0.397652	0.363911
47	donor	48765.5	43626.8	46162.6	49212.2	59358.3	21694.9	5913.54	814.797	44207.6	47571.1	53541.7	37460.6	45427.7	47546.8	46362.4	51382.6	36601.6	52500	39153.1	55332.6	44333.2	42292.5	53655.9	48233.2	50131.2	46717.7	65647.1	48721.3	48062	42236.9	56344.4	52965.2	30017.3	49279.2	51013	49801.5	46313.9	42823.4	38776.4	52530	38298.3	50306.7	42466.6	46967.4	49089.4	47013.1	49200.7	40535.9
47	acceptor	10436.8	6305.86	8701.5	9649.32	9799.68	33610.3	48454.4	49874.6	23599.3	9730.24	12908	12104.6	7394.18	3542.75	6654.83	15640.4	14820.5	5472.93	6828.07	7016.71	8400.15	11683.9	15550.6	5492.84	5716.36	6120.87	14060.6	5342.85	12217.4	8318.58	6420.77	10333.8	12961.9	10540.6	13873.2	13399.9	3345.11	7180.13	13288.9	15151.7	913.965	16027.6	12661.2	6935.64	10492.8	14098	13308.1	8855.49
47	fret	0.175925	0.126465	0.158417	0.16396	0.141945	0.608038	0.891757	0.984075
48	donor	39764.8	35232.3	49777.9	54116	41832	46503.9	36309	54813.5	40380.7	45361.4	61388.1	58991.8	50922	63115.2	55636.3	55260.1	50216.7	41885.2	42107.8	50544.3	48870.5	42905.5	51486.2	34395.4	36417.1	45690.5	43944.6	48894	36249.4	53404.5	39199	44831.7	39849.4	44128	28820.7	29635.6	30775	49121.2	46590.1	48265.5	47723.2	40502.9	52332.5	47072.8	49271.7	47315.8	49600.8	38061.2
48	acceptor	16317.1	12524.2	16283.8	6278.98	25187.2	17541.9	29675	11036.4	13776.4	6134.32	9650.14	16926.3	9554.82	8362.05	16585.1	6715.78	13777.4	15957.9	23685.4	3052.13	7921.14	19826.5	14309.3	10832.9	34705.1	14834.8	9912.45	29869.7	19438.7	22435.4	24874.3	19127.4	25812.6	34959.5	22475.5	34600.3	25026.5	17686.8	25908.5	18005.1	21778.9	15894.5	25182.9	9907.12	9585.92	7931.8	22380.8	24268.1
48	fret	0.291118	0.262251	0.246917	0.104303	0.375704	0.273779	0.449681	0.168062	0.254579	0.119238	0.136088	0.223045	0.157697	0.117369	0.229718	0.108033	0.215428	0.275703	0.36005	0.0569763	0.13984	0.31626	0.217331	0.239267	0.487544	0.245004	0.18412	0.379625	0.349314	0.295944	0.388456	0.298842	0.393369	0.441743	0.437778	0.538767	0.448689	0.265128	0.35712	0.271856	0.313353	0.281479	0.324987	0.173724	0.162405	0.143594	0.310448	0.389438
49	donor	87055.9	108461	91824.9	96804.5	90040.7	98924.3	96758.6	101019	98802.3	76391.2	86547.7	101202	91507.8	85389.1	72623.1	126418	145039	122971	148686	122724	99917.5	124574	98721.5	124918	137688	127392	114303	116765	109204	112754	111172	126363	121166	118096	119892	18827.1	-1535.69	-142.373	690.662	-80.9833	2905.36	-906.248	616.062	186.334	6227.39	-603.185	-1116.06	-520.815
49	acceptor	26281	18956	24185	19267.2	28806.9	22229.9	23584.1	30071.6	25094.7	30375.9	20486.6	25118.8	25348	27342.8	22031.3	7091.51	3472.92	-4479.9	-1102.28	2003.42	798.772	4272.63	1092.89	-6556.37	-2693.53	-4696.37	-2785.63	-3176.45	-1992.07	-2862.67	-3479.31	-839.537	-2130.15	1415.42	1370.24	318.767	-922.225	-286.845	805.038	2258	2257.39	-1232.64	-2404.99	-4108.59	-179.16	-1992.38	3254.58	3651.21
49	fret	0.232188	0.149184	0.208463	0.166166	0.241941	0.183316	0.19628	0.229537	0.202362	0.284193	0.191084	0.198884	0.217215	0.24283
50	donor	80075	79462.5	75222.3	74213.9	70637.9	80433.3	70308	78009.1	76102.6	77610.8	85397.4	107222	100574	111601	99120.3	99447.8	94936.7	108799	112892	101936	110450	99970.4	63866.4	68147.2	68432.3	65920	69555.1	64593.4	78302.1	102797	104815	120206	110004	103641	107012	108540	99550	101011	98583.5	104983	102722	113752	101136	110446	102174	94078.6	112154	101898
50	acceptor	19301.2	22359.9	24689.8	29825	18969.3	18323.5	21561.8	25585.8	22447.6	20790.9	22306.6	-1126.2	-694.878	-2266.43	-943.548	126.306	-1214.43	-5226.05	-2138.81	126.901	-6039.25	-3363.62	-4831.03	-340.322	-97.908	-901.288	-390.923	1477.32	1820.6	-1157.05	-2592.34	-1589.27	-3291.12	-3447.54	2064.03	-1785.58	-1428.19	-1859.66	-957.568	-2021.18	-2817.05	-1464.69	907.066	-6724.22	-3275.21	-3377.11	-4035.06	-3209.29
50	fret	0.194249	0.219874	0.247534	0.286886	0.211318	0.185736	0.235117	0.246578	0.22749	0.211318
51	donor	52123.7	42388.3	51304.4	57601.9	47721.9	39429.7	54645.9	46380.5	52453	51652.5	54603.1	51893.4	50029.9	57055.6	51740.8	55869.5	51864	57010.1	50677.8	49617.6	51443.6	45320.2	60343.6	42321.4	43794	41890.3	53845.3	60512.3	43847.5	51566.8	49240	62440.1	47229.2	46988.2	48388.6	46168.9	52549.4	59106.6	54841.4	41668.1	46675	51652.5	56431.8	52102.3	54736.9	53457.1	50704.6	51341.9
51	acceptor	17992.5	18704.9	14303.2	17339.8	15562.8	19751.4	18465.7	12205.4	12335.2	18078.1	18168.4	15790	24701.5	9949.05	13450.6	9681.13	14588.4	16453.7	15046.7	15657.8	21011.5	15322.2	13484	18571.4	17955.1	16328.6	10353.6	16328.9	13597.2	21097.9	15652.1	19271.8	14915.8	21723.8	21730	16166.3	14549.8	12952.5	20884.3	9574.48	11459.4	13490	13201.8	7708.56	14130	26250.7	20757.1	10583.6
51	fret	0.256256	0.306149	0.218233	0.231618	0.246001	0.334135	0.252828	0.20829	0.190269	0.258833	0.24941	0.233302	0.330489	0.148715	0.206641	0.14793	0.219899	0.224071	0.229098	0.240059	0.290178	0.252828	0.182973	0.305256	0.29106	0.280517	0.161348	0.212423	0.236676	0.290178	0.240906	0.235831	0.240059	0.316009	0.309726	0.259693	0.216563	0.179745	0.27615	0.187021	0.196791	0.207465	0.189456	0.129242	0.204993	0.329579	0.290178	0.170911
52	donor	71200.2	69009.9	80221.1	78900.5	68230.5	76122	77828.8	73433.8	88004.4	73722.5	71160.5	72264.7	80304.1	73996.7	71672.9	71575.5	87802.3	76645.2	89473	78705.6	86023.4	71589.9	78586.5	111765	116059	105422	98490.3	112390	104956	125124	84875.9	86752.3	81126.8	74841.1	84731.6	73329.1	77197.3	81339.7	69897.6	74819.4	80755.2	65250	68281	93370	78070.5	85319.7	73368.8	77042.2
52	acceptor	22715.2	19247.9	18751.5	19126.3	18311.7	26123.9	20716.8	21577.2	25274.3	22523.6	17495.1	11717.2	12342.4	18822	22431.7	18569.2	19446.3	19547.8	19416.1	12304	14671.3	24532.8	19961.5	18310.4	15690.9	21059.1	19015.7	16572.6	16293.2	13948	18461.9	26348	21094.8	15647.2	21682.8	18595.1	25653.8	10877.6	17821.2	22019.7	18224.9	21983.9	25086.1	26634.8	19696.4	10574.7	19553.5	8604.88
52	fret	0.242027	0.217744	0.189406	0.194849	0.211372	0.255236	0.210578	0.227383	0.223354	0.233863	0.197183	0.139604	0.133019	0.202681	0.238753	0.205832	0.181684	0.203467	0.178614	0.135208	0.145498	0.255236	0.202681	0.141074	0.119273	0.166433	0.161906	0.128655	0.134478	0.100096	0.178614	0.233051	0.206621	0.173265	0.203467	0.201894	0.249424	0.117838	0.203467	0.227383	0.183994	0.251916	0.268628	0.221748	0.201109	0.109988	0.210578	0.100799
53	donor	93251.5	74948	75106.2	74030.3	76058.7	83989	68897.4	72451.2	76052.4	88757.9	81093.5	68865.8	74384.7	72473.3	78780.2	70049.3	81783.3	76106.2	86140.9	88849.7	87650.3	69406.9	81517.5	80938.4	83080.8	78811.8	75647.3	71837.3	73565.1	70827.8	69188.6	73941.7	68293	69476.6	67169.6	73397.4	75897.3	61362.8	72986	69100	69267.7	72441.7	71916.4	63166.5	85697.8	70764.5	73704.3	87960.4
53	acceptor	38548.9	42275.5	37731.4	43164.4	35977.6	44045.8	33755.6	35053.4	26374.7	34075.8	38832	38819.5	45517.2	44384.9	38733.1	35017.1	36826	33442.2	38156.6	37644.7	40933.6	38766.2	25942.2	42714.4	41293.3	40381.8	43257.9	39169.1	30379.5	34616.3	33667.9	31747.8	31877.3	29889.2	36675	38662.2	37941.5	38712.8	35373.5	34282.4	37884.3	36737.4	38924	40254.5	34384.5	36851.6	31667.9	32035
53	fret	0.292529	0.360989	0.334378	0.36844	0.320853	0.344399	0.328948	0.326243	0.257247	0.277768	0.323545	0.360061	0.379707	0.379707	0.329851	0.333471	0.310148	0.304833	0.306602	0.297785	0.318167	0.358208	0.241286	0.345315	0.33166	0.338922	0.363778	0.352664	0.292529	0.328046	0.327144	0.300423	0.318167	0.300423	0.353586	0.345315	0.333471	0.387279	0.326243	0.33166	0.353586	0.336193	0.350822	0.38918	0.286427	0.342571	0.300423	0.266611
54	donor	34870.5	42379.2	40480.4	41957.8	28673	40066.7	30815.4	35610.5	26505.2	36081.4	30484.2	27194.4	31094.7	35571.1	34244.8	28567.7	33253.6	39762.1	38010.6	33992.3	39592	36122	28161.5	30188.5	37383.6	34989.9	35257.7	31439.9	45200.6	34498.7	38643.9	43549.4	34097.6	42568.3	34116.6	40724.1	29574.2	36405	37026.9	35462	33944	35272.9	41302.9	38484	33512.5	37576.5	52098.7	42466.7
54	acceptor	5069.14	13878.1	9066.39	12567.4	8235.56	8724.24	8114.83	8825.98	15032	10031.5	8486.05	18319.1	16175.8	9377.9	7181.6	7576.98	9982.74	4443.49	14222.3	9362.93	10045.8	16721.5	6455.44	5540	9459.08	7210.47	11419.4	4247.59	4077.27	14138.5	6884.15	9032.47	-5739.81	9255.14	4788.16	9349.85	8507.14	9964.41	12115.3	12628	11037.4	4709.6	11865.2	6275.42	1813.14	9975.3	9524.48	6862.31
54	fret	0.126619	0.246747	0.183037	0.23051	0.222886	0.179257	0.20862	0.198183	0.361793	0.217176	0.218127	0.402987	0.342287	0.20862	0.173593	0.20957	0.23051	0.100494	0.272637	0.216224	0.201976	0.316063	0.186819	0.154754	0.201976	0.170762	0.244835	0.119142	0.0828386	0.29093	0.150994	0.171706	-0.202424	0.178313	0.122879	0.186819	0.223839	0.215273	0.246747	0.263033	0.245791	0.118208	0.222886	0.140668	0.0513912	0.20957	0.154754	0.138793
[truncated: 462 more columns]

## Sheet: 239-239_inter_liposome
1	donor	22136	19043.8	15994.2	12337.2	34774.6	23907.7	25613.2	13138.7	26185.9	22874.4	20528.4	17890.6	23267.2	18537.4	21034.8	19384.6	17456.7	18677.8	17100.2	19902.1	19323.1	17564	21310.9	26659.2	15869.6	17286.3	21386.6	20118.2	16319.2	13596.2	19454	15035	16505.4	12499.7	12442.9	12610.2	26633.9	25969.7	14134.2	16756.2	20504.7	22849.1	20544.2	23036.9	20170.3	19067.5	20676.7	13376.9
1	acceptor	6622.6	5005.28	9005.18	7637.15	3759.94	9806.73	7509.58	9695.1	10106.7	8377.64	3738.17	6819.47	9887.12	6076.11	6720.94	8555.16	9486.35	6068.73	6118.96	7435.4	10625.1	7545.18	11291.3	3532.09	7236.32	8006.01	1441.78	6321.91	7331.69	9365.02	4509.83	9779.28	3847	4829.3	2659.25	9208.86	2451.71	6720.35	10602.2	8882.43	7872.97	5856.13	6834.62	7337.41	5490.83	6571.27	6268.11	7886.18
1	fret	0.230102	0.208529	0.360035	0.382084	0.0976078	0.290473	0.226493	0.424818	0.278459	0.26834	0.15371	0.275695	0.297896	0.246409	0.241871	0.306276	0.352423	0.2455	0.263755	0.272015	0.354326	0.30068	0.346724	0.117302	0.312814	0.316558	0.0629191	0.23915	0.31001	0.408218	0.188041	0.393664	0.188928	0.278459	0.175658	0.421881	0.0840074	0.205847	0.428741	0.346724	0.277537	0.20406	0.250054	0.241871	0.213904	0.256438	0.232813	0.370559
2	donor	49160.1	41614.2	50717.2	53328.4	46768.4	45855	64802.8	44128.4	53956.2	49233.6	41030.1	47778.8	40799.9	47822.5	45544.9	52663.4	37157	42893.2	53331.6	45488.4	55044.4	35756.6	48346.9	45807.1	40360.8	37676.1	45896.6	46100.2	50692.7	42997.6	50501.9	49694	26957.3	61196.2	53194.1	49909.3	45667.4	37411.7	42683.2	41875.3	43039.2	46247.2	41470.3	36048.6	53932.7	54785.4	47361	55489.9
2	acceptor	19714	13588.8	16579.6	13184.4	16481.4	20619.5	14009.1	16926.6	18200.7	15288.1	13600.2	14937.5	11031	16433.6	20379.6	12805.4	12433.1	10374.1	10498.1	13661.6	17240.5	19560.7	13425.3	11800.5	17241.9	13076.7	9954.89	17986.5	16084.2	15601	10397.8	10486.3	20818.3	16531.1	13552.6	14926.4	21360	16976.8	15710.4	16545.3	9374.12	14422.9	18051	10815.7	15302.6	16191.4	11361	12070.4
2	fret	0.285815	0.246225	0.246225	0.198523	0.260854	0.309833	0.177549	0.277421	0.251883	0.236603	0.248645	0.238209	0.213079	0.255949	0.308964	0.195492	0.251072	0.194737	0.164357	0.231061	0.238209	0.353542	0.216954	0.204619	0.299462	0.257581	0.178289	0.280774	0.240605	0.266615	0.170925	0.174598	0.435941	0.212306	0.203091	0.230271	0.318574	0.312446	0.269096	0.283298	0.179029	0.2374	0.302905	0.231061	0.220848	0.227905	0.193227	0.179029
3	donor	31892.4	40501.4	36952.1	31220	31716.8	45469.1	35431.7	42082	41914.8	47974.7	62279	56391.4	55232.2	51219.6	58935.4	50737.9	53460.9	52191.4	59621.2	50719.5	44040.7	32129.9	-4268.12	-9592.09	-1135.29	-9107.03	-1719.04	-1969.93	-3570.64	-8745.74	-6653.29	-3413.41	671.148	-6621.51	1311.76	-5266.68	-1458.11	-2041.85	-4094.17	-1382.84	-8018.15	-8016.48	-2538.62	-9192.34	1642.94	-5805.26	-2893.22	-9555.29
3	acceptor	30290.5	27739.1	13902.6	23631.4	16338.2	9945.35	13320.9	14751.2	17343.3	11961.7	-376.206	-977.618	5980.33	4208.22	4082.98	-1893.24	2100.36	326.308	1106.5	-2577.45	-1041.5	520.345	542.247	176.83	-1402.79	-2432.92	-1.983	188.726	-1723.79	465.953	-766.443	-582.313	-1337.52	-820.825	-761.408	-2293.23	-1792.3	-689.717	-1114.47	-3113.92	935.487	570.2	-3963.88	-3999.04	-1223.71	-616.781	-1067.21	2456.12
3	fret	0.486931	0.406864	0.273334	0.431282	0.340311	0.179515	0.273334	0.259759
4	donor	28611.2	22053.4	19940.3	35286.3	25758.7	34577.1	24058.9	26203.2	27966.5	27816	20883	28375.8	27138.1	28438.3	36489.9	27129.3	17383.8	26025.4	27647	29538.3	23407.3	19775.2	30602.1	19970.6	30395	23118.2	27794.6	20858.6	30882.5	19988.2	19828	34289.9	26951.5	25757.7	24360.8	26038.1	29022.5	36560.2	31754.9	22722.5	30418.5	28338.7	23023.4	34747.1	26424	28105.2	25587.8	23482.6
4	acceptor	13727.8	7331.54	9923.07	10236	12569.7	10534.6	6619.54	3999.32	9961.86	7930.83	5257.45	9693.3	6348.97	12631.6	11478.7	11276.3	8206.19	6810.84	8334.65	5104.33	9084.35	8125.83	8116.84	10773	9245.42	10894.1	5811.02	14464	6375.49	6200.42	11055.4	4720.93	7700.09	7883.77	10541.3	8629.29	10257.1	6122.41	11126.7	9641.14	6477.65	12646.2	5948.16	8393.69	8700.54	5297.22	9439.38	7690.72
4	fret	0.324531	0.249082	0.332587	0.224681	0.328104	0.233559	0.215887	0.132301	0.262376	0.221474	0.200892	0.254881	0.189223	0.307738	0.239252	0.293818	0.320972	0.207176	0.231938	0.147673	0.279243	0.29123	0.209544	0.350728	0.233559	0.320084	0.173133	0.409143	0.170857	0.236808	0.358078	0.120766	0.222275	0.23437	0.301624	0.249082	0.26154	0.143254	0.259871	0.298147	0.175414	0.308615	0.205601	0.19465	0.247435	0.158816	0.269087	0.246612
5	donor	25216.3	29376.8	29608.8	26802.7	22695.4	22381.7	22825.6	27864.5	26577.5	25657.3	21607	23125.1	22011	25832.2	26369.3	19052.9	19906.5	26172.5	30004.2	27417.8	22066.1	29505.2	24744.8	24439.7	27139.2	24623.1	23631.7	26165.9	26017.6	19411.2	22970.1	29503.3	26268.5	24748.6	27647.8	24013.8	29310.3	31207.6	22744.8	31770.3	21678.3	22689.7	21512	27564.1	23646.9	26683.9	30294.1	27087.9
5	acceptor	7227.94	10132.3	15951.1	14273.7	14947	13444.8	12381.7	16304.8	14730.6	13926.3	17374.5	10225	14756.4	13685	10385.7	18855.8	16657.5	12219	11321.4	13120.5	12871.6	13136.5	16584	11412.9	9825.02	15743	15256.8	15798.7	8314.66	15965.2	14072.1	10001.8	9594.57	9242.91	14658.1	11529.4	14266.5	18293.1	9890.25	13950	12989.4	15061.9	13994.4	11756.2	11085	11948.1	10981.4	15193.9
5	fret	0.223104	0.256419	0.350512	0.347377	0.397229	0.375503	0.351556	0.369267	0.356773	0.351556	0.445421	0.306393	0.401354	0.346332	0.283081	0.497035	0.455597	0.317996	0.273504	0.323259	0.368227	0.308505	0.401354	0.317996	0.266038	0.389999	0.392066	0.376541	0.242483	0.45153	0.379652	0.253208	0.267106	0.272438	0.346332	0.324311	0.327465	0.369267	0.303222	0.305336	0.374465	0.399292	0.394132	0.29899	0.31905	0.309565	0.266038	0.358858
6	donor	47418.9	40351	45339.5	41200.1	49519.5	44794.8	42599.6	39162	44571.5	42375.6	50877	49373	49372.3	49491.8	43429.5	50899.1	37296.1	48240.2	38880.4	52610	46910.4	36254.3	45289.8	46494.4	46662.9	34212.7	42390.5	31646.2	46685	41185.2	42641.6	38638.7	48507.6	45787.5	38772.4	38492.2	40486.9	41474.6	52433	54880.6	44902.9	44648.3	48640.6	43957.8	46384.2	47969.3	46072	39558.9
6	acceptor	11909.3	15178.3	16569	14065.7	13157.2	17253.8	16368.3	12158.3	19178.5	22362.4	18265.9	12019	14573.3	11794	13406.6	11504.6	16214.7	13180.6	21452.3	16504.1	14184	17533.7	17978.9	18458.7	17820.4	17606.8	13947.7	20708.7	16262.6	13622.6	19507.1	16617.9	16925.4	10614.3	12767.7	13403.4	13083.1	12919.2	18201.3	14082.4	17807.2	23402.8	18236.1	17746.9	17616.3	23917.7	17583.6	22612.7
6	fret	0.200894	0.273372	0.268023	0.254726	0.210314	0.277843	0.277843	0.237164	0.301291	0.345471	0.264466	0.195778	0.22758	0.192377	0.236291	0.184751	0.303108	0.214615	0.355762	0.238912	0.231932	0.325997	0.284115	0.284115	0.276053	0.339874	0.247679	0.395646	0.258261	0.248558	0.314056	0.300383	0.258261	0.188136	0.247679	0.258261	0.244166	0.237164	0.257377	0.204313	0.284115	0.343606	0.272479	0.287722	0.275159	0.332463	0.276053	0.363287
7	donor	32702.7	34674.5	24935.8	26828.5	25089.5	35011.2	38377.6	29758.6	33455.2	24057.6	23508.6	27272.4	31946.9	29598.3	35615.4	29328.7	26587	16709.7	35174.7	27500.9	32278.2	29919.9	27743.5	21660.3	25926.5	24317.5	31013.5	33440.1	17040	22225.5	24924.9	25610.3	31466.1	34154.7	30067.1	32852.1	15720.1	27328.8	28692	32420.1	23866	35132.5	33885.1	28496	25233.5	42074.3	27542.1	27915.6
7	acceptor	10172.6	6161.43	7171.01	6343.62	7338.51	4188.81	9044.19	9365.92	9733.21	4262.47	8044.01	6457.35	7940.29	8174.89	6701.35	4513.18	6126.43	4419.16	8712.48	5993.8	5358.94	12647.7	11102.9	8311.37	10952.8	10562.1	10576.8	7124.21	11593.8	9018.94	7586.31	12706.4	7552.77	1766.55	12154.5	8334.51	7312.95	10764.7	8892.05	8923.13	6070.55	15193.2	9973.12	3674.49	9220.37	4929.32	8025.77	10618.8
7	fret	0.237388	0.151076	0.223142	0.191568	0.226289	0.107133	0.190813	0.238987	0.225501	0.150359	0.255166	0.191568	0.199156	0.216105	0.158286	0.133338	0.18704	0.209129	0.198394	0.17883	0.142511	0.297002	0.285924	0.2775	0.297002	0.303026	0.25435	0.175863	0.404568	0.288453	0.233414	0.33201	0.193837	0.0490989	0.287605	0.202211	0.317836	0.282544	0.236589	0.216105	0.202977	0.302163	0.227078	0.113943	0.2675	0.105102	0.225501	0.275825
8	donor	33832.5	40084.6	46200.6	43084	46559.9	35190.4	58037.3	42374.8	51357.7	49211.3	40627.4	34955.9	45894.2	31175.5	39245	33603.7	43668.4	31576.4	29059.3	27207.9	36726	36149.2	34619.2	46007.7	33921.4	25295.9	22434.6	26186.6	44744.4	37448.4	34867	35063.7	37875.8	41164.5	35305.7	30296.1	34702.5	32675.2	41750.7	44604.5	35110.9	34602.2	34010.3	30188.3	36440.4	41943.6	19798.4	34972.9
8	acceptor	13798.1	15457	11919.5	12523.8	14373.3	15955.5	9980.95	17356.8	17772.3	19541.1	14784.4	19727.1	17309.2	17435.9	21571.9	16880.1	14269.2	19215.9	21035.4	15051.4	13820.6	20616.7	14964.2	17696	15530.9	17759	23379.2	15298.3	11243.7	9815.38	11326.7	13220.7	20200.7	8455.53	18673.5	8026.81	14323.4	16516.8	7596.42	7382.68	12885.8	11299.9	14773.3	11104.3	14610.9	15028.8	25744.2	17556.8
8	fret	0.289361	0.277984	0.205292	0.22514	0.23603	0.311541	0.146893	0.290241	0.257254	0.284097	0.266702	0.360841	0.273636	0.35898	0.35434	0.334124	0.246171	0.378657	0.419919	0.356194	0.273636	0.363638	0.301733	0.277984	0.314229	0.412141	0.510758	0.368312	0.201198	0.207755	0.245322	0.273636	0.347872	0.170542	0.346031	0.2094	0.292002	0.335948	0.153938	0.142221	0.268429	0.246171	0.302621	0.269303	0.285849	0.264115	0.56512	0.334124
9	donor	34514.3	34921.8	40378.9	36063.7	33210.2	36425.5	28570.5	33152.5	35586.5	30222	30425.1	32583.9	32211.3	33549.1	27547.6	35632.2	35230.7	33562.4	27078.8	36930.4	34963.9	31023.7	29360.2	34616.5	34560	32926.5	32543.1	35948.3	29041.6	34003.5	34170.6	25422.4	28499.5	33275.1	31587.5	27773.5	36924.4	35194.7	31425.2	39357.2	35560.1	36526.5	33329.2	37496.5	34598.5	33931.4	38377.6	31129.5
9	acceptor	12542.4	12587.6	11660.8	11721.1	14111.3	8462.05	13249	11926.2	8982.41	8947.82	14331	9799.27	9593.97	7567.06	12791.1	5281.25	11022.1	10957.3	13833.9	13287.2	10297.2	6661.63	10237	11125.9	9520.19	9383.82	10479.7	11114.8	12009.6	10984.1	12910.9	12772.8	9366.63	8695.52	14489.3	15473.9	10495	14876.2	11183.3	9013.32	8885.45	13503.7	11628.9	12152.2	11563.5	14513.3	9232.37	14911
9	fret	0.266528	0.264681	0.22437	0.245364	0.298133	0.188261	0.316903	0.264681	0.201743	0.228009	0.320673	0.231653	0.229831	0.183783	0.316903	0.128895	0.238043	0.246276	0.337706	0.264681	0.227099	0.176634	0.258226	0.243532	0.216202	0.221645	0.243532	0.236215	0.292528	0.244448	0.27393	0.334859	0.247193	0.207156	0.314079	0.357717	0.221645	0.297198	0.262835	0.186469	0.199941	0.270227	0.258226	0.244448	0.250868	0.300004	0.193646	0.323504
10	donor	11646.6	12308.7	11590.4	7056.31	10759.9	4747.96	7055.48	10474.2	9435.65	2156.44	2607.21	12594.4	18176.2	1430.75	14044.9	4055.29	9219.35	14131.6	13688.3	7806.77	11678	13242.4	5159.1	13122.7	8212.13	3355.19	3869.53	20706.6	3925.68	1904.63	-3657.36	-3583.06	4461.48	-516.819	7446.81	9945.04	15714.3	20340	14620.4	10357	9092.21	14309.1	26561.7	24620.7	16094.9	18161.3	15578.9	12490.3
10	acceptor	41231.6	41040.8	42792.6	44959.3	40839.2	41567.2	37469.5	41983.7	39945.8	44266.7	40538.5	40343.1	45702.7	41871.3	42202.4	39026	48196.6	28607.7	49686.1	38877.4	46018.3	46457.4	44514	50745	41197.5	44130.9	42525.3	46097.6	40849.5	53572.8	49018.4	46166.9	40061.6	47341.8	42555.1	39150.7	48032.9	51710.3	47547.5	36053.3	44235	45711.1	45672.7	49364.2	44492.3	44572.8	43665	49693.2
10	fret	0.779387	0.768817	0.787373	0.8644	0.791385	0.8974	0.841921	0.800795	0.808916	0.953776	0.940209	0.762255	0.715994	0.96748	0.750529	0.906145	0.839139	0.668967	0.783374	0.832208	0.798099	0.778061	0.895948	0.794067	0.833591	0.92975	0.916421	0.689783	0.912008	0.965951	1.08064	1.08396	0.900309	1.01096	0.851708	0.798099	0.753125	0.717256	0.764876	0.776737	0.829446	0.760947	0.631904	0.667753	0.733782	0.710959	0.737589	0.799447
11	donor	48036	51388.3	46408.8	60786.4	51703.4	47056.7	57006.2	56325.7	55552.9	63080.6	56236.1	68579	54066.9	57159.7	50592.3	51510.6	39056.3	49327.8	36994.4	41588.2	64633.1	52416.5	57598.5	52716.7	50384.5	44561.5	69563.7	54532.8	73705.2	64572	57402.9	46968.4	50950.9	53361.9	57757.4	41239.1	68773.2	42280.9	48470.7	59293.6	50452.4	41857.1	59626.4	53568.4	50950.9	41744.4	59955.1	58748.9
11	acceptor	8942.97	10831.8	13251.8	10767	11045.9	9174.44	12139.9	12100.9	8098.99	8678.16	9114.91	14558.3	12630.4	7019.6	7926.52	8986.57	8374.48	12291.7	11341.7	10248.7	12053.2	11099.8	13035	9171.22	11671.5	12067	5988.7	9709.78	12007	7407.2	9466.17	15193.9	11934.9	11012.2	12111.2	14630.2	12059.2	18841.8	15306.4	11074.7	11337.4	8936.42	12057.8	9315.21	13146.4	11842.2	15083.2	10290.5
11	fret	0.157226	0.174309	0.22188	0.150452	0.176249	0.162847	0.175601	0.176897	0.127262	0.120944	0.139592	0.174955	0.189398	0.109141	0.135442	0.148623	0.176249	0.199518	0.234946	0.197476	0.157226	0.174955	0.184752	0.148015	0.188066	0.213367	0.0792359	0.151064	0.140189	0.10309	0.141374	0.244611	0.190066	0.171095	0.173665	0.262201	0.149232	0.307849	0.240126	0.157226	0.183433	0.176249	0.167905	0.148015	0.205008	0.221165	0.200884	0.149232
12	donor	15373.9	14663.6	18454.4	16390	11525.3	10668.9	12205	15363.7	10089.5	17307.5	8222.17	11754.7	12058.8	14539.6	15880.2	11465.8	17953.2	14332.3	11635.7	8580.69	10646.8	10570.4	15732.4	13941.5	12458.1	12804.8	6820.37	11554.2	9324.91	12354.5	8776.09	13283.9	6929.12	8412.47	9996.07	14901.5	10019.9	11037.7	7892.53	20038	10774.3	19978.6	12512.5	12373.2	7914.62	14503.9	10262.8	13579.6
12	acceptor	19293.1	15317.2	17004.6	13038.7	16789.9	11991.4	12812.4	10589	7735.67	15608.2	15358.7	15347.7	12061.5	10772.2	12398	17414.5	11189.1	12873.1	17213.3	14472.2	10881.6	9655.47	14735.4	11152.3	13270.6	8845.55	12404.7	17877.6	13047.7	9071.78	9672.02	13807.5	20893.4	13148.5	9725.51	14205.2	9091.24	10714.9	12881.2	13759.8	17057.6	8234.91	14513.3	11317.1	14243.4	14568.3	14151.5	13155
12	fret	0.556917	0.511176	0.479637	0.442714	0.593071	0.528711	0.512203	0.408487	0.433848	0.474602	0.650889	0.566417	0.499907	0.426006	0.438768	0.602762	0.38349	0.473597	0.596295	0.627744	0.505028	0.477622	0.483676	0.44469	0.515287	0.408487	0.645357	0.607086	0.583431	0.423074	0.52457	0.51015	0.751033	0.610335	0.492781	0.487723	0.475608	0.492781	0.620118	0.407519	0.612505	0.291513	0.537023	0.477622	0.643148	0.500927	0.579162	0.49178
13	donor	4082.64	13308.8	13391.4	14314.6	4288.04	6718.99	5495.05	5482.34	1448.4	7642.24	4952.95	8482.91	3205.97	4880.96	9863.56	5708.92	7830.71	6913.81	7428.37	4078.4	12476.6	9793.67	5670.8	6409.83	9863.56	2212.84	15015.6	55.0559	11938.8	4997.42	5838.09	4904.25	10058.4	-239.283	5814.8	8868.31	6564.41	9010.18	9086.41	7589.31	8095.4	4768.73	5789.39	5285.41	7087.44	8747.61	4690.38	7261.08
13	acceptor	43695.1	48685.3	47239.8	49843	50771	46444	37365.2	46523.4	45227.2	48904.6	43272.1	48085.3	45197.5	47292.8	52083.7	44451.2	50127.4	40882.1	46200.3	47010.3	45400.6	51762.7	47316.4	55174.1	44701.2	40408.1	49898	45080.7	40296.4	41298.6	46613.8	49144.5	48118.8	51213.5	48293.9	46438.7	41728	49337.4	47294.1	44086.2	43699.5	48650.9	51436.5	45130.1	52556.6	40207	47681	53868.1
13	fret	0.914276	0.785416	0.778638	0.777287	0.921838	0.874201	0.871282	0.894822	0.969742	0.865466	0.897795	0.849608	0.934031	0.906758	0.841043	0.885943	0.865466	0.855351	0.861121	0.920322	0.784057	0.841043	0.893338	0.896308	0.819886	0.947888	0.769212	0.99839	0.771897	0.891855	0.888896	0.90976	0.826898	1.00478	0.891855	0.839621	0.864016	0.845318	0.838201	0.852476	0.843891	0.911263	0.899285	0.894822	0.881527	0.821285	0.90976	0.881527
14	donor	10797.2	14083.1	14627.3	8701.71	18468.4	17632.1	17893.9	9560.03	20912.5	9777.72	17331.8	13186.2	14315.9	17209.2	12486.3	18147.4	6157.05	15425	15022.7	14966.2	15022.7	12631	15206	21309.3	17957.3	21758.4	12840.4	13260.6	14591.5	15938.9	16411.5	10889.5	16766.9	16648.4	17375.9	16908.8	14000.4	14105.1	9992.64	14215.4	19943.9	9779.09	10490	17502.6	15894.8	17178.9	14484	16310.9
14	acceptor	11057.3	8232.46	11647.6	8280.1	12445	10006.8	13516.6	9798.49	9755.83	8714.97	12056.2	11844.8	7096.65	7982.5	9132.98	9825.31	11814.2	9365.85	7382.58	16147.9	8475.69	8585.69	11413.9	12570.3	5151.51	9297.82	8259.22	7424.91	9110.67	11443.2	5039.16	9306.56	14048.1	15957.6	11768.3	7906.07	11120.5	5068.38	13032.5	12807.7	13593.2	10743.4	11899.8	9441.31	8803.43	13274.7	10334.9	14288.2
14	fret	0.506322	0.369004	0.443467	0.487256	0.402135	0.362219	0.430626	0.506322	0.31793	0.471275	0.409973	0.473269	0.331357	0.316973	0.422745	0.351581	0.657113	0.37774	0.329436	0.519422	0.360282	0.405072	0.428654	0.370945	0.222512	0.299795	0.391384	0.359315	0.384558	0.417827	0.234657	0.460326	0.456353	0.489259	0.404093	0.318887	0.442478	0.264724	0.566138	0.474266	0.405072	0.523462	0.531547	0.350616	0.356413	0.43556	0.416845	0.46729
15	donor	23755	18009.8	23537.3	28464.7	21996	25507.4	18942	30612.8	31411	15857.2	25127	29364	21510.1	25656.9	12877.9	22994.3	29300.2	27290.6	30667.8	16563	26912.4	24471.8	15509.8	18212	20511.9	22794.2	16714.7	31760.6	17194	30410.6	22743.6	25267.7	18176.9	12526.1	29880.7	31197.7	21817.9	26083.5	19076.1	28082.1	26793.7	23416.4	27855.6	20223.9	20050.2	32103.6	18704.5	22108.2
15	acceptor	15392.6	11883.6	13907.3	13967.4	12418.4	18987.5	15838.5	12836.3	10988.9	15348.2	16694.6	12679.8	15514.8	11511.5	11651.2	15817.6	18788.2	13319.3	12018.3	10712.7	11267	16836.3	16326.7	12236.9	21207.8	13648.7	14530.8	12691.8	14479.7	14372	15732.4	12292.7	15820.1	15747.1	10703.7	11546.2	19047.3	17176.7	10343.9	16356.3	14476.3	16574.9	8636.94	12231	19717.7	16582.6	17288.5	15940.8
15	fret	0.39349	0.397325	0.371747	0.328873	0.360605	0.426601	0.455797	0.295658	0.259537	0.492267	0.399248	0.301683	0.418704	0.309491	0.475423	0.407953	0.390625	0.327983	0.281197	0.392534	0.2948	0.407953	0.512656	0.402141	0.508328	0.374554	0.465044	0.285425	0.45682	0.320893	0.408925	0.327094	0.465044	0.557012	0.26366	0.270299	0.466077	0.397325	0.351424	0.368018	0.350511	0.41478	0.236799	0.37643	0.495458	0.340529	0.480656	0.418704
16	donor	17360	15575.4	18158.3	23128.5	20183.1	21904.3	18248.4	13735.2	18799.9	17627.9	19523.7	15873.4	15603.2	15247.4	18490.8	17387.8	20145.3	18563	24729.6	21049.2	22126.6	17025.3	16947.5	19181.2	18885.5	13819.7	14702.5	14523.5	16339.3	17346.6	16871.8	16951.9	22100	14618	23456.5	17878.1	21330.5	17504.5	19261.3	19800.6	18809.9	19801.7	12789	19314.7	16163.6	17347.7	16301.4	16043.5
16	acceptor	9853.25	11366.4	9357.89	12163	13138.7	10387.3	13137.3	6039.97	10138.5	14135.6	7516.65	7030.55	9193.47	11291.4	7299.59	9788.07	11459.8	5570.24	8837.89	8123.09	14548.8	11027.3	8410.51	9942.09	8203.75	12141.2	13522.4	11568.8	12943.4	12891.2	12440.8	12234	8877.58	10627	10764.3	11156.3	12035.7	7128.54	7578.12	5488.79	11659.8	10141.9	17465.1	9466.09	7815.92	8722.72	6883.58	11537
16	fret	0.362482	0.421912	0.340263	0.344305	0.394743	0.32206	0.418895	0.305861	0.350366	0.445017	0.277473	0.306874	0.370553	0.425933	0.282546	0.360463	0.362482	0.230722	0.263259	0.278488	0.396757	0.392729	0.332175	0.341273	0.302822	0.468089	0.47911	0.44301	0.442006	0.425933	0.423922	0.418895	0.286603	0.420906	0.314975	0.384669	0.360463	0.289647	0.282546	0.217484	0.382653	0.338241	0.576959	0.329141	0.326107	0.334197	0.296742	0.41789
17	donor	18995.1	16165.3	28833	23926.3	17155.5	27310.9	22873.9	19834.7	16803.6	19841.2	30006.5	29291.3	17797	14661.2	28747.9	11991.8	22292.9	15875.6	14692.3	13358.4	12975.4	15432.1	25243.8	21860.8	25445.1	12114.5	20093.3	21913.2	18726.6	24242.2	19762.7	25641.5	18942.7	19389.5	19039.2	18716.8	16031.1	15004.9	17654.6	21752.8	20430.4	11307.7	22584.3	15148.9	17468.1	19998.3	19592.4	19818.3
17	acceptor	9848.95	6011.11	4854.05	13814.4	13125.6	11416.1	5858.57	9740.56	13328.5	12349.7	11215.9	10498.9	8085.09	3793.14	3825.64	7188.65	9745.91	11505.7	8681.87	6963.14	11882.8	8844.14	3791.16	3570.72	9275.97	9255.32	13180.5	4564.06	11135.6	9095.08	9297.48	10427.3	11500.6	12907.3	7540.6	11510	4900.07	12330.5	12575.3	7364.6	6811.15	8085.15	6128.15	5759.14	9122.33	8513.99	6939.07	13840.4
17	fret	0.341397	0.271291	0.1445	0.365769	0.43317	0.294633	0.204069	0.329358	0.442033	0.383799	0.272182	0.264175	0.312818	0.20578	0.117563	0.375235	0.30461	0.420448	0.371442	0.342337	0.477949	0.363882	0.130565	0.140388	0.26684	0.43317	0.396248	0.172746	0.373337	0.273074	0.320149	0.289217	0.378085	0.400097	0.28381	0.38094	0.234277	0.450942	0.41558	0.252678	0.250037	0.416553	0.213502	0.275754	0.343268	0.298254	0.261515	0.410727
18	donor	18372.7	17549.3	14153.6	21803.9	17037	25821.2	17359.1	11171.1	12075.2	14581.1	19115.4	11961	8204.96	16503.6	12766	8528.45	9904.48	18414.4	10085.7	15762.2	17142.3	22165.7	11829.7	18160.7	10786	15535.1	9179.54	6937.67	705.182	13099	17658.7	1921.18	5828.37	8464.85	15084.4	15562.5	14434	2558.58	15288.2	-318.635	1610	19386.9	8499.04	30763.1	36614.7	35850.7	27805.9	32502.3
18	acceptor	10522.3	23100.6	8036.2	11821.2	12010	13088.1	13440.2	26043.7	29146.1	11549.8	6837.03	17165.2	28820.8	14472.8	16674.2	24046.6	19318.6	20884.3	22950.2	14533.6	15940.2	15162.3	17108.4	13513.8	12917.8	14382.7	23089.3	25685.9	23148.7	18310.9	18752.2	34090	20729.7	19065.4	8121.94	25881.8	22177.1	32750.3	21477.5	33238.1	28460.7	11112.4	18817	-16.053	4328.06	2789.62	-244.016	918.586
18	fret	0.363804	0.568375	0.361908	0.351515	0.413745	0.336496	0.436244	0.699489	0.70733	0.442155	0.263102	0.589485	0.778046	0.466975	0.566276	0.737848	0.660712	0.530915	0.695021	0.480005	0.482017	0.405979	0.591608	0.42643	0.545402	0.48101	0.7152	0.787366	0.970704	0.58313	0.515507	0.946786	0.780388	0.692791	0.349623	0.624795	0.605461	0.928082	0.584188	1.01028	0.946786	0.364753	0.688337	-0.00077986	0.106043	0.0724327	-0.00855963	0.0275129
19	donor	23609.4	24479.6	28721.5	22145.4	24819.3	25153.4	34209.7	17963.9	29270.3	26325.4	21296.2	25987.2	25432.7	30151.8	30130.7	22939.8	25804.7	29012	25574.5	23379.2	26614.6	29843	25582.9	21755.1	30732.9	24667.7	25810.3	25966.1	26317	26777.4	24708.4	27724.9	28457.6	26013.8	23787.6	23717.5	24829.1	23431.1	26760.6	26203.3	27310.8	25897.3	21877.3	22297	27302.4	24426.3	26451.8	19996.4
19	acceptor	10341	10537	10001.1	12734.8	10629	12031.8	10903.1	8424.56	13095.1	7478.08	9698.2	12172.5	11342.7	10996.6	9489.63	7244.72	7420.62	16666.1	10152.7	9885.57	9557.81	9201.72	8845.01	14582.4	9730.81	11947.1	12900.5	14557.1	16284.1	7401.65	11676	7218.73	15273.6	12764.8	13897.4	7204.77	9900.15	9158.95	6240.19	11658.1	8666.77	11140.4	11803.7	8591.01	8836.11	14409.8	11661.1	13683.8
19	fret	0.304925	0.301196	0.25782	0.365385	0.300265	0.323661	0.241413	0.318965	0.308665	0.221512	0.313341	0.318965	0.308665	0.266985	0.239597	0.239597	0.223314	0.364429	0.284495	0.297479	0.264232	0.235968	0.256906	0.401034	0.240504	0.326483	0.333081	0.359646	0.382663	0.216113	0.320842	0.206248	0.349179	0.329308	0.369214	0.233251	0.28542	0.280798	0.189304	0.307731	0.240504	0.301196	0.35013	0.278029	0.244135	0.371131	0.305864	0.405891
20	donor	12301.6	11509	9759.74	8128.32	20010.4	12879.3	8981	19578.3	13059.5	16160.6	23245.5	14510.7	11913.4	8424.11	25727.3	10443.7	10984.5	23465	13304.5	33759.6	39018.9	39527.3	34383.5	43541.1	40622.6	50831.6	36883.7	30145.5	33944.4	42829.4	47145.9	42330.3	41789.5	36329.2	38674.6	36837.5	35083.6	36271.4	47834.6	35804.6	35474.2	40100.4	46947.2	42861.7	30690.8	33463.8	39984.8	28701.2
20	acceptor	23838.1	18531.7	12653.3	17769.6	17018	16695.1	20478.9	10124.7	16560.9	15403.8	19222	18843.8	19212.6	21594.7	23112.3	22967.8	20796.2	13228.7	7235.93	2840.65	-681.165	851.992	595.559	1177.92	-873.727	-908.042	-2394.91	-1447.62	-244.362	-1757.54	-507.753	-897.684	-668.937	4862.63	243.428	-2650.64	-1308.7	62.257	-1395.23	-1635.14	2318.58	-82.231	-3112.37	1704.41	-2186.54	-1328.04	3085.23	652.788
20	fret	0.660047	0.616952	0.565051	0.685851	0.459498	0.565051	0.695495	0.340867	0.559079	0.488427	0.452168	0.565051	0.616952	0.719543	0.473295	0.68723	0.654709
21	donor	2379.37	-1417.24	6568.78	3519.73	6627.61	-302.828	2266.89	659.3	4149.61	-2542.03	3355.34	669.683	4147.88	-1022.69	4403.99	6129.25	7939.29	6278.06	-941.363	-2412.24	10445	6556.67	4232.67	9823.75	-3992.14	3254.97	-3194.41	2133.64	10057.4	2593.94	-2152.68	5189.61	1152.48	2266.89	5852.37	3490.31	1306.49	230.149	3102.69	9496.7	1330.71	813.311	2773.91	-4348.61	10675.1	7690.11	6193.27	5283.06
21	acceptor	24948.4	19100.7	24576.1	25160.1	25784.7	21934.8	20384.5	18526	24584.8	21731.2	27520.7	20177.2	20800.5	24208.3	21983.7	21526	21579	24031.6	23256.5	20948.2	23210	24257.1	25285.9	21283.1	18702.5	27253.1	26027.4	29288.4	24394.6	24922.2	22103.3	31228.7	20495	19714.7	19752.7	20805.1	21252.1	25525.6	28990.1	20756.9	22945.8	26747.8	27512.5	23373	22739	21700.9	22551.6	20748.6
21	fret	0.913389	1.08082	0.788905	0.877302	0.794989	1.01369	0.900419	0.966208	0.855736	1.13276	0.891394	0.967548	0.83318	1.04416	0.83318	0.778007	0.731548	0.792553	1.04277	1.12984	0.689736	0.787691	0.856998	0.684008	1.27213	0.89268	1.14008	0.931704	0.708194	0.905596	1.10806	0.856998	0.946223	0.896545	0.771982	0.855736	0.942252	0.990476	0.903005	0.686297	0.944898	0.97023	0.90819	1.22866	0.680581	0.738616	0.784054	0.797429
22	donor	66906.3	48126.1	81912.4	59635.4	53038.2	69867.4	70474.7	68650.2	67179.9	69211.5	67029.1	66899.9	59014	60137.8	60829.5	64651	54887	58535.9	67205.5	64186.9	62624.6	45874.6	75348.4	74429.2	73205.6	77203.6	71498.8	69275.4	49196.3	61297.5	70831.4	94917.5	83488.8	80270.7	51186.9	52549.8	45690.5	55276.9	49840.6	61248.9	69093.9	64567.9	62700	66809.2	63363.6	63802.1	52852.8	52017.9
22	acceptor	12280.8	14981.7	10617.3	16383.4	15996.8	9695.5	8969.07	15522.9	9428.62	13252.8	7059.14	13766	14029.3	17429.1	8030.83	16793	8860.19	9747.92	9588.24	13704.4	17481.1	23275	10346.3	16573.6	10920.6	12796.6	11273.9	13630.7	20278.5	11802.6	16574.3	6263.91	7545.76	4333.74	11183.8	14692.8	12446.8	8383.05	9784.59	9822.2	15291.7	14330.7	7119.03	11498.4	12556.9	3654.45	8876.65	8658.08
22	fret	0.155159	0.237377	0.114447	0.215729	0.231905	0.121731	0.113132	0.18443	0.123063	0.160775	0.094978	0.170713	0.191758	0.224916	0.116426	0.205894	0.139264	0.142688	0.125068	0.175735	0.218018	0.336231	0.121065	0.182246	0.129767	0.142002	0.136537	0.164308	0.291915	0.16148	0.189552	0.0619286	0.0829331	0.0510771	0.179336	0.218782	0.214207	0.131791	0.164308	0.137899	0.18152	0.18152	0.102051	0.14682	0.165726	0.054073	0.144063	0.142688
23	donor	8040.74	6333.83	7466.82	7364.97	3543.79	5372.7	6644.66	11048.2	12544	7437.11	6050.58	6350.8	6898.2	11747.3	4134.69	9467.58	12130.3	14410.1	16092.6	14724.1	16126.5	10978.2	15385	8126.66	9601.25	12261.9	3447.26	7882.67	4916.53	132.102	-1160.01	-538.355	-1668.16	-904.348	-3500.25	-903.287	-1748.78	-1288.38	249.857	9513.19	642.371	1457.1	884.245	2036.33	655.101	-3857.75	-455.608	-2360.89
23	acceptor	18519.9	11448.8	13943.4	16278.9	15165	24580.5	22774.6	14767.4	8526.44	15056.1	8711.46	21817	14246	13877.2	16782.9	13877.7	9798.1	4847.35	10035.2	7660.12	15136.2	6740.6	3922.25	10767.6	9235.96	11919	14805.2	13341.2	1359.58	-961.788	-342.535	-1594.04	2797.34	-2378.66	-944.854	-4179.84	3998.47	-4475.18	-2008.74	-799.641	3085.2	1626.05	-2350.21	764.227	-1846.26	-2698.18	1362.65	2234.99
23	fret	0.697514	0.644106	0.650832	0.688043	0.810812	0.820828	0.774117	0.572125	0.404563	0.669015	0.589784	0.774117	0.673783	0.541484	0.802594	0.594672	0.446764	0.251959	0.383788	0.341826	0.484373	0.38066	0.202811	0.570157	0.490432	0.492449	0.810812
24	donor	7608	3065.53	6458.22	5227.06	648.78	3178.16	11412.2	10356.8	10821	-1372.77	8359.33	19137	13143.3	5303.89	5447.77	8914.04	14750.8	4321.43	9130.84	-1649.47	3766.73	-2141.68	2792.08	12119.2	10268.2	5626.81	5139.82	7512.3	4437.97	7528.57	6683.49	6700.42	480.155	-695.015	1956.12	4038.87	9302.72	8604.78	3858.53	359.708	2822.68	3314.89	-3061.63	6456.27	9887.38	13403.8	10100.9	6582.58
24	acceptor	23202.9	26729.7	16754.4	28930.9	32768.2	32821.2	16230.4	19653.5	22941.5	17588.5	17988.4	21058.7	18816.9	13891.1	21538.8	25882.8	24453.5	25672.4	22485.5	22018.3	35236	16551.3	30466.2	23400.2	21769.2	29466	22543.2	18565.6	22594.4	22229.4	18339.8	27175.4	23983	22712.3	14831	24282.4	13518.2	22329.9	30785.8	21209.9	26944.1	20441	30198.5	19757.5	26378.8	18327.3	18656.3	21153.5
24	fret	0.752677	0.896838	0.722263	0.847355	0.980785	0.911354	0.586931	0.655279	0.679948	1.08418	0.682905	0.52419	0.588917	0.723245	0.797669	0.743855	0.623629	0.856102	0.711452	1.08132	0.903614	1.14883	0.916188	0.659229	0.679948	0.839575	0.814253	0.711452	0.835683	0.746797	0.733064	0.802549	0.980785	1.03164	0.883275	0.857074	0.591897	0.722263	0.88909	0.983669	0.90555	0.859988	1.11275	0.753657	0.727173	0.57799	0.648362	0.762472
25	donor	47616.7	37867	26863.2	21313.6	36422.1	19197.2	16936.8	32685	20063.3	19499.3	29889.6	35785.2	31698.3	24052	29023.6	28220.2	41383.4	21063.9	24237.1	50159.5	26205.8	22528.5	32859.9	17277.2	45054.2	16343	19626.5	15089.8	25138.7	18312.5	20487.8	23042.9	32998.3	29141.4	29347.2	22248.9	19995.9	27467.4	17633.6	17323.1	14389.3	23469.3	13725.3	21742	24385.8	30069.2	22594	24786.1
25	acceptor	17236.9	28635.5	36705.2	33571.2	31076.5	40826.5	41367.5	33260.9	30804.1	34861.2	33433.9	26514.6	24551.4	39653.1	34543.8	27867.3	28435.6	33567.1	43476.9	16142.4	23811.4	34841.7	29403	33037.6	24242	33872.9	35476	43487.8	25152.1	35117.4	37529.5	28466.3	32668.5	34611	34496.4	33837.4	33207.5	30215.7	38447.4	36343.8	34961.4	30606.3	43091.6	25146.3	32152.3	34993.2	28659.3	27762.8
25	fret	0.265795	0.430273	0.577014	0.611099	0.460042	0.680602	0.710024	0.504868	0.605567	0.64148	0.527819	0.425373	0.436177	0.622294	0.543679	0.496612	0.406907	0.614442	0.642617	0.243377	0.476162	0.607764	0.472128	0.656319	0.350164	0.674785	0.643754	0.742445	0.499702	0.657467	0.64717	0.552209	0.497642	0.542616	0.540493	0.603351	0.624539	0.523619	0.685272	0.677109	0.708836	0.566177	0.758271	0.536256	0.568338	0.537314	0.558639	0.527819
26	donor	10774.3	8818.42	10227.3	12587.9	12422.9	16361.6	14706.6	13477.6	13599.2	20011.6	16562.9	21400.6	17692.3	13703.8	15404.3	12831.8	13435	5613.66	13617	16590.6	19450.5	18129	15417.1	15101.3	7077.35	13697.4	13698.1	13781.3	15040.9	14856	11646.2	11219.5	11142	16835.3	13029.6	13659	15038.8	17705.1	21712.1	12787	11139.1	11351.8	14615.6	18267	13747.9	6550.34	14962.7	7245.2
26	acceptor	16200.7	33450.3	18918.6	20740.8	21160.9	18923.6	21583.5	18183.8	21156.8	18728.2	23620.6	19987.1	15159.6	20200.7	15124.1	25289.7	26149.4	28102.8	9632.44	20707.6	23173.9	19735.1	14515.4	16266.6	21588.2	21377.6	23726.9	13815.7	24016.9	20518.9	18889.2	22700.3	19387.5	20141.4	18922.3	25256.9	16850.4	18195.9	21767.5	14970.3	20554.5	18814.8	24963.7	15657.8	17094.6	22083.6	23776.8	34835.2
26	fret	0.600622	0.791353	0.648825	0.622536	0.629875	0.536809	0.594389	0.574733	0.608952	0.483282	0.588169	0.483282	0.461335	0.595427	0.49532	0.663643	0.660451	0.833606	0.413991	0.5552	0.543948	0.521565	0.485286	0.518525	0.752947	0.609995	0.634076	0.50035	0.615214	0.579894	0.61835	0.668952	0.635127	0.544969	0.592314	0.648825	0.528661	0.506397	0.50035	0.538847	0.648825	0.623583	0.630924	0.461335	0.554176	0.771551	0.61417	0.828016
27	donor	4191.67	6135.42	10247.4	2016.9	4453.83	7447.67	2215.33	7642.48	3313.21	4151.84	1864.09	6846.59	2943.87	1859.75	5956.54	3075.68	1303.56	3319.73	8061.79	6757.51	8932.28	14273.3	8518.76	9951.23	2239.95	12694.5	9746.28	7859.74	1369.46	1688.11	3852.74	307.061	3272.66	1327.46	1493.3	4660.23	3807.12	2665.78	357.03	4484.97	1153.65	645.262	3038.74	708.991	1808.33	2347.86	6131.08	861.798
27	acceptor	16561.2	18118.7	22157	18957.1	22867.8	21716.2	22259.2	17035.8	25134.9	27204.8	21745.3	18746.8	25065.8	22693.6	19750.9	19079.2	23502.4	21575.3	22141.8	23872	26970.8	14255.1	21974	21255.9	18168.1	24968	23963.9	27063	22574	17926.1	24123.7	23617.3	25212	20989.8	20331.3	18880.9	21141.7	25377.5	18337	20393.6	20892.1	18942.8	22409.3	20437	18781.8	16672.3	25475.7	21656
27	fret	0.798231	0.746645	0.684112	0.903433	0.837373	0.744509	0.908987	0.690427	0.883504	0.868069	0.92123	0.732783	0.894564	0.924575	0.768064	0.861472	0.946947	0.866969	0.732783	0.779893	0.75092	0.500165	0.721091	0.680958	0.890136	0.663124	0.710491	0.774512	0.942463	0.913435	0.862571	0.987523	0.884608	0.940223	0.931274	0.802571	0.847215	0.904543	0.980733	0.819935	0.948069	0.967185	0.880191	0.966058	0.912322	0.876882	0.805821	0.961554
28	donor	19630.4	25034.5	21511.5	22162.9	25845.8	22673.1	19688	20165.9	20380.5	14556.6	15278.4	19378.2	18458.8	23313.3	14101.6	26913.9	24750	28077.9	16948	27998.5	17204.9	20010.1	21304	20540.4	21517.4	24661.3	26457.8	16808.1	22314.5	17669.3	17850.9	22184.6	24198	21473.9	19983.7	15016.8	16475.3	14770.5	16503	19310.6	20775.5	13721.8	24919.3	23594.3	20418.1	15985.1	25435.5	18969
28	acceptor	13160.5	21549.1	22499.9	27731.3	27616.5	18969.4	28703	22433.1	20046.9	22156.7	25448.2	21806.5	16667.5	25102.4	27149.1	19419.3	20777.8	22385.5	29473.9	21603.5	23650.9	19028.5	20503.6	26635.6	19184	18779.4	22139.3	24186.7	20170.1	27197.8	20048.1	26516.6	23829.3	19676.3	25259.9	20372.8	29039.8	22052.4	22597.8	24324.6	23895.4	18713.8	19156.3	22355.7	27452.1	25193.6	21518.9	23272.1
28	fret	0.4014	0.462623	0.511644	0.55615	0.516678	0.455666	0.592911	0.526765	0.495575	0.603178	0.62482	0.529795	0.474576	0.518694	0.658009	0.419083	0.45666	0.443767	0.635164	0.435852	0.578577	0.487563	0.490566	0.564292	0.471585	0.431901	0.455666	0.589835	0.474576	0.606263	0.528785	0.54498	0.496578	0.478568	0.558184	0.575512	0.638272	0.599068	0.577555	0.557167	0.534844	0.576534	0.434864	0.486563	0.57347	0.61141	0.458647	0.551069
29	donor	15989.2	21441.4	18510.2	16858.2	11493.3	18601.6	21861.3	22568.1	21848.8	19893.3	25255.4	15816	16650.3	20778.9	20618.1	18210.8	22345	19171.3	23297.1	21988.8	28875.4	23531.3	26651	23945.7	20609.8	24001.2	26878.3	19725.6	24871.5	21212.7	19052.1	20923.1	21464.9	20124.8	19747.8	17706.3	25892.9	14848.6	21926.5	27666.9	29123.5	31844.1	25457.8	32388.7	30578.7	25748.8	30336.2	31898.1
29	acceptor	8463.37	10725.8	6304.86	9865.99	11835.5	6765.5	11501	8709.78	11012.4	9572.32	9158.9	10489.6	10515.4	3627.78	7780.47	7643.21	8264.33	11372.3	6281.24	8470.6	7947.3	9736.36	1885.71	4211.43	4491.82	9464.02	10219.4	6225.67	4056.19	8723.73	9109.48	13825.4	10457.2	12600.5	8543.35	12119.7	10017	10364.1	6933.49	-3975.47	625.345	-4311.3	-1846.76	-2052.07	-1826.7	-2010.22	502.768	-1128.7
29	fret	0.345725	0.333649	0.254158	0.3692	0.50706	0.266547	0.344793	0.278137	0.335501	0.324419	0.266547	0.398775	0.387265	0.148432	0.273669	0.295226	0.270104	0.372039	0.212392	0.278137	0.215831	0.292516	0.0657466	0.149257	0.179246	0.282609	0.275455	0.240114	0.140208	0.291613	0.323498	0.397813	0.327182	0.385354	0.301568	0.406492	0.279032
30	donor	11402.3	16865.1	17030.9	21538.3	21682	30729.9	19997	17772.8	18910	19839.7	12908	22911.4	14216	23632.3	13215	24661.5	7115.98	5787.11	27615.3	19451.6	21441.3	10790.6	14202.5	32055.1	22743.1	14847.3	17344.1	23701.1	14514.4	25264.5	5640.95	12538.3	20649.1	17959.4	12894.5	23281.1	14852.2	14105.5	15544.9	26137.8	12623.1	21063	18878.1	19968.7	17065.3	16680.9	22224.8	25023.8
30	acceptor	13754.6	12830.6	14277.1	10128.8	7840.86	10387.8	4829.02	12168.6	8576.58	7309.39	8464.75	9150.29	6847.22	8544.6	6404.91	5572.64	7248.37	12997.4	5589.33	9816.53	6627.47	9541.78	6167.94	6477.89	6402.27	6380.82	6796.94	4076.3	13723.1	4426.2	8902.66	8525.29	8824.99	7420.09	7298.23	11317.7	8945.6	9762.35	7527.17	4740.55	10806.1	8179.95	5188.6	9978.2	6977.06	8314.45	7823.98	6961.71
30	fret	0.546844	0.432526	0.456218	0.319589	0.265799	0.252971	0.194403	0.406558	0.311775	0.269043	0.395866	0.285494	0.324845	0.265799	0.326606	0.184285	0.504719	0.691685	0.167994	0.335475	0.236489	0.468867	0.303191	0.167994	0.219627	0.300636	0.281345	0.146668	0.486051	0.14938	0.612485	0.404624	0.299786	0.292184	0.361816	0.327488	0.375817	0.408522	0.326606	0.15347	0.461464	0.279692	0.215868	0.332803	0.290506	0.332803	0.260157	0.217362
31	donor	32457.2	28756	17010.3	35934	27437.3	36244.9	36391.9	40469.2	29106.1	38083.2	32221.6	44953.8	39008	38927.2	29922	26815.6	37013.7	37105.7	44535.1	29411.4	34212.5	27198.3	27961.4	27668.5	32158.7	39579.2	36891.3	36978.9	26097.3	29266.6	38805.9	30941.1	30621.2	32174.4	32522.3	35736.5	37877.8	32389.9	37883.4	36257.3	35882.4	35340.4	47192.7	20921.4	36940.7	41147	34507.6	44840.4
31	acceptor	8092.3	12481.1	13981.5	15075.6	10819.6	9617.35	13357.7	11802.9	12606.6	10669.6	13655	9730.4	12881.7	13009.2	9761.48	12156.5	10244.7	14280.5	12615.2	7177.28	15088.1	10278.2	18206	13385.7	10205.7	7025.78	15278.3	7967.51	21768.7	16335.5	13146.6	14952.5	11678.3	15678	15149.8	12101	12437.5	11617.4	7107.45	10700.2	13736	8721.73	11823.8	13106.1	12634.1	10370.2	17399.9	7862.27
31	fret	0.199587	0.302916	0.45114	0.295118	0.283153	0.209711	0.268814	0.225517	0.302048	0.219161	0.29772	0.178172	0.248131	0.250588	0.245669	0.311643	0.216789	0.278066	0.220746	0.196495	0.306397	0.273849	0.394049	0.325778	0.240799	0.150666	0.292552	0.177417	0.455201	0.358381	0.253051	0.325778	0.276377	0.32756	0.317801	0.253051	0.247313	0.263806	0.158013	0.227913	0.277221	0.198039	0.200361	0.385482	0.254698	0.201137	0.335621	0.149204
32	donor	30454.7	22957.3	21689.2	23314.5	31077.3	35058.6	27789	31257.5	26307.9	28024.9	27186.1	31133	29497.9	29375	20701.3	20860.2	26255.5	20154	25683.6	24009.2	26648.7	27628.4	30669.3	25177.4	29040.7	23688.1	27654.7	28770.4	25400.2	32507.6	27944.6	30471.1	30177.8	32905.7	24513.8	23624.2	32812.4	32425.7	33117.1	38119.1	28201.9	22421.6	28975.2	17678.4	26058.8	34303.3	31393.5	37183.6
32	acceptor	10419.2	12707.2	9276.61	11870.4	13081.8	9094.05	6140.72	9778.23	7914.97	5002.35	12513	8869.5	13392.8	8263.55	12168.1	11876.4	13471.1	7507.12	13115.6	8525.01	9158.49	10970.8	11232	9715.12	9999.62	8156.34	6577.71	9858.63	4996.37	7014.61	9684.05	9453.76	10216.9	4919.17	7785.19	8876.66	7219.08	13773.3	9076.74	3832.97	11854.6	9081.62	9942.7	17039.2	15094	8908.36	5522.31	12239.3
32	fret	0.255154	0.356279	0.299948	0.337601	0.29632	0.206394	0.180864	0.238447	0.231457	0.151582	0.315457	0.221908	0.31271	0.219312	0.370423	0.362865	0.339459	0.27114	0.337601	0.26224	0.256038	0.284574	0.268465	0.278295	0.256038	0.256038	0.191877	0.255154	0.164066	0.17749	0.256923	0.236698	0.252505	0.130174	0.241073	0.272926	0.180019	0.298133	0.214995	0.0913978	0.29632	0.288184	0.255154	0.491027	0.36664	0.206394	0.149925	0.247219
33	donor	21077.4	22977.5	14359.2	20550.8	25772.6	21493.6	26809	22178.3	25310.6	26378.2	26428.2	33835.2	30623.9	28526	27855.9	25454.2	24640.4	27356.4	17662.1	23516.6	26055.6	19364.5	19479	22609.2	33092.2	21185.6	21570.6	25980.7	18299	25839.2	13264.5	17633	18228.2	17670.4	23160.7	16063.7	17050.2	25681	21847.4	16463.3	21433.3	20611.2	26265.8	24417.7	7368.43	17537.2	20621.6	19914
33	acceptor	4094.76	9868.44	10635.9	8750.07	8473.66	9295.22	8175.05	6710.41	3058.82	8039.16	4893.29	6985.92	10074.3	8682.79	7979.02	7882.15	5569.59	10381.9	9564.22	4907.36	7599.8	8219.34	9938.85	6886.22	3334.78	2973.49	6379.99	6638.43	12040.3	6729.56	11477.9	4116.47	5395.3	6847.72	4949.83	4743.38	7504.36	7655.96	3878.53	8762.28	5074.88	6267.01	6349.18	9132.5	10241.9	7681.6	7868.68	5478.11
33	fret	0.162721	0.30071	0.425688	0.298959	0.247449	0.30158	0.233592	0.231974	0.107549	0.233592	0.156004	0.170999	0.247449	0.233592	0.222325	0.236836	0.184711	0.27498	0.35157	0.172512	0.22553	0.298092	0.337927	0.233592	0.0915176	0.123166	0.227941	0.203324	0.396532	0.206464	0.46385	0.189329	0.228746	0.27922	0.176307	0.227941	0.30594	0.229552	0.150815	0.347001	0.191647	0.232783	0.194746	0.272445	0.581615	0.304193	0.275826	0.215948
34	donor	42696	59534.7	56951	57275.7	72010.9	60816.2	68641.4	82832.6	78273.2	69615.5	73667.1	74416.7	70384	69292.5	62835.1	67479.1	95438.3	86699.4	89929	92440.1	96453.8	83889.5	90972.1	97041	93346.8	79280	77648	106407	98821.5	102087	91162.1	85371.3	91790.7	87077.6	89409.1	78953.6	114096	100825	86205.5	90728.6	89901.3	80083.1	89652.7	92650.8	104253	82499.2	96743.9	90367.7
34	acceptor	20608.4	18229.4	14209.8	22823.8	16019.6	19512.4	12445.4	13257.9	15066.5	23555.3	22958	26235.5	18691.9	19668.1	10534.8	18061.3	979.603	995.106	-3799.76	-4201.5	636.715	3576.1	3749.14	-1514.56	-738.358	-4579.08	8297.19	-5196.28	2229.06	-2926.53	-276.098	4430.12	-3621.49	1152.55	-1075.07	-3976.02	-1388.14	952.321	-2711.06	3768.51	3409.23	-3117.97	6687.4	2417.57	-2937.8	5024.74	-2772.11	-3953.75
34	fret	0.325335	0.234059	0.199472	0.284911	0.182342	0.243235	0.153737	0.137779	0.161751	0.252442	0.237726	0.260754	0.209439	0.221265
35	donor	25595.2	26256.9	28792.5	40722.4	29910.7	22332.8	25953.1	30155.6	32242.6	28574.5	29618	29252.2	31316.8	25351.9	27672.6	25234.2	19009.9	35438.2	27282.9	24243.2	27378.4	22969.1	27610.6	25935.6	27896.9	28735.2	20104.3	27432.4	23396.9	23506.7	26156.7	26266.5	27031.6	25588.9	22415.5	29999.8	25951.5	31550.6	33685.3	27768.1	29493.9	26015.2	25566.6	29217.2	31636.5	29101	33588.3	28013
35	acceptor	7566.15	8779.72	1796.83	7401.88	6963.42	13573.6	8379.11	7868.57	7663.28	7710.84	12724.9	10925.8	8392.68	9907.21	8111.52	7070.25	11936.2	7047.9	6690.02	6739.87	11129.4	5593.7	9219.08	9076.37	5619.86	7321.44	4959.38	8350.52	8509.08	9979.25	7413.63	11988.4	11005.3	5364.33	9653.1	11412.4	3580.62	7318.48	7907.15	6524.95	5373.18	12773.9	10593	6848.32	9779	7996.58	13406.1	5528.13
35	fret	0.227908	0.250998	0.0585485	0.153517	0.18861	0.378486	0.243863	0.206846	0.192069	0.212089	0.300793	0.271662	0.211214	0.280717	0.227026	0.219103	0.386142	0.166274	0.197271	0.217347	0.288904	0.195536	0.250104	0.259057	0.167986	0.203358	0.198139	0.233211	0.266249	0.298042	0.220861	0.313679	0.288904	0.173121	0.300793	0.275279	0.121582	0.18861	0.190339	0.190339	0.154365	0.329444	0.292547	0.189474	0.235863	0.215593	0.285261	0.164572
36	donor	29791.3	28266.8	22696.2	30161.4	28486.3	21296.4	26939.1	30908.7	26515.1	29823.1	25812	28087	32624.7	24516.7	24023.3	26669.6	22652.7	25913.3	23235.7	29381.6	29288.1	23670.7	25995.1	26293.1	28986.2	29551.7	37121.4	29588.7	38043.4	29428.3	36202.7	20589.3	24844.6	22122.9	21065.9	23323.4	19480.4	25909.4	15107.6	20993.8	28019.5	26523.6	25208.8	21882.6	28754.4	30815.8	22057.9	26884.5
36	acceptor	5682.8	3142.93	9957.74	9657.02	2325.53	5779.9	7447.69	9852.25	10422.1	14486.2	11123.9	4051.76	10017.5	9752.08	7897.88	9474.11	9302.72	7724.73	6382.68	8844.41	9071.61	4234.43	7199.98	7868.97	8552.66	8255.6	6938.43	7030.73	9598.97	9773.4	7194.7	3796.36	10759.5	8068.64	10100.6	10115.8	7117.9	7320.82	10098.3	1395.77	6473.81	14552.9	9991.84	10291.2	10460.2	5774.12	14100.8	10029.8
36	fret	0.160451	0.099626	0.30477	0.242114	0.0755888	0.213848	0.216768	0.242114	0.28221	0.32738	0.300843	0.12565	0.235284	0.284169	0.246996	0.261653	0.291032	0.229433	0.215795	0.231383	0.23626	0.15174	0.216768	0.230408	0.227484	0.218716	0.157546	0.192456	0.201202	0.248949	0.166262	0.15561	0.301825	0.267522	0.324428	0.302807	0.267522	0.220664	0.400462	0.0621525	0.1876	0.353986	0.284169	0.31951	0.266544	0.157546	0.389566	0.271437
37	donor	32926.5	27423.5	21963.4	27379.4	35723.3	29499.6	31896.3	31796.8	20922.5	34098.4	26612.6	29421.4	28865.1	33269.2	33015.3	33169	33358.1	28729	33346.1	30727.6	31320.4	26659.2	29088.1	29369.1	28161.3	25821.9	31476.7	30509.6	31868	31810	24718.6	25569.2	31578.1	23280.2	24363.3	27383.8	31687.8	26229.5	29013.8	24822	24150.3	26361.2	29796.3	36653.3	25939.1	28140.5	29078.1	32240.3
37	acceptor	11186.8	11163.6	8651.16	15800.9	11859.5	9385.74	10574	15750	12784.6	10012.1	10822.1	13584	12641	16021.7	16732.6	16213	11161.9	16343.8	14782.5	11160.9	10946.9	14169.4	13426.3	14345.2	13093.2	12317.5	13400.6	9815.41	14523.9	8837.12	18705.5	14264.6	13218.7	16687.8	9881.74	10989.1	11273.2	14587.9	12017.5	15633.1	16697.5	10935.8	14906	12743.4	11720.9	11249.9	16898.6	15483.2
37	fret	0.253395	0.289684	0.282202	0.365606	0.249695	0.241402	0.248772	0.331191	0.379102	0.226711	0.288748	0.316027	0.304707	0.325495	0.335946	0.328342	0.250619	0.362723	0.307528	0.266368	0.258948	0.347391	0.316027	0.328342	0.316973	0.322652	0.299064	0.243244	0.313193	0.217568	0.430775	0.357923	0.295309	0.418015	0.288748	0.285941	0.262656	0.356964	0.292495	0.386843	0.409214	0.293432	0.333092	0.258022	0.3113	0.285941	0.367524	0.324547
38	donor	37124.1	33002.8	36124	38933.8	30220.6	34462.7	27885.2	37063.6	35195.3	31625.4	44881.2	34138.5	41474.3	40415.6	43503.7	43672.3	41974.3	41822.3	45734.7	47914.4	45058.8	39344	39056.5	37331.1	33625.6	52669.4	39778.2	38499.7	33768.5	41760	33656.7	42313.2	31913	34699	37426.3	33904	29826.7	31332.4	28103.2	46586.4	35907.9	38006.9	36250.4	44547.8	36446.4	31187.7	39329.4	35830.9
38	acceptor	10768	7696.58	16007.1	9428.77	9308.32	6712.61	8830.06	4968.41	18215.8	13533	11272.1	15776.9	11857.1	13532	9104.71	9532.85	8748.19	11774.4	10695.2	9570.69	15646.3	14018	10752.9	12158.1	7912.73	11072.8	14808.4	15411.6	17642.4	9340.87	10193.4	13349.1	11670.9	9622.83	11825.4	15590.2	8711.56	11873	15090.8	19613.1	12163.9	13800	13585.3	13482.1	12230.6	13248.4	13340.5	14843
38	fret	0.225088	0.188748	0.307132	0.19483	0.235423	0.162707	0.240225	0.118535	0.340795	0.299344	0.200947	0.315868	0.222721	0.250759	0.173027	0.178984	0.172286	0.219576	0.189505	0.166378	0.25812	0.263064	0.21566	0.245886	0.190262	0.17377	0.271366	0.285666	0.343507	0.182729	0.23223	0.239421	0.268036	0.217224	0.240225	0.31499	0.225879	0.27471	0.348957	0.295904	0.253205	0.266375	0.272201	0.23223	0.251573	0.298483	0.253205	0.293334
39	donor	25388.4	18974.9	25538.3	22476.8	27734.6	31900.5	24059.6	34213.4	30918.1	24230.4	31533.2	25826.4	29570.6	23925.2	24586.9	27396.8	22905.5	24360.1	24687.1	23038.3	30961.6	32289.6	28258.9	24611	35912.7	25856.7	24298.8	24664.6	23682.9	23631.6	21808.1	20221.4	19008.3	20581	24723.6	27328.5	24378	22712.9	31313.4	22646.9	23876.3	25967	24039.4	23800.2	25996.5	21757.6	29079.8	20049
39	acceptor	8670.55	13459	9277.27	5950.05	7021.1	11112.5	14790.4	9866.05	7479.59	10669.7	5147.2	7657.49	10813.1	11636.2	13433.6	12832	15817.1	13009.2	9881.91	10142.8	12385.6	9184.97	13922	5766.91	11019.6	8987.52	10413.5	10979.5	8960.87	10194.1	10159.9	4563.78	11720	13088.3	12372.4	7820.81	8071.33	10541.6	8821.31	9725.52	7900.16	8881.11	5901.9	11128.1	6379.53	10792.2	12428.6	9796.57
39	fret	0.254902	0.41455	0.266222	0.209699	0.20217	0.258375	0.380964	0.224035	0.194683	0.306134	0.140228	0.228281	0.267971	0.326983	0.353718	0.318788	0.408737	0.348145	0.285591	0.305235	0.285591	0.221487	0.329715	0.189715	0.235101	0.257506	0.29985	0.307935	0.274104	0.301643	0.317881	0.183942	0.380964	0.388573	0.333391	0.222334	0.248845	0.316974	0.219796	0.300746	0.248845	0.254902	0.197174	0.318788	0.197174	0.331557	0.29985	0.327897
40	donor	51337.5	43540.9	42970	41345.9	39709.2	39774.2	40985.9	43087.3	43146	46903.1	51359.7	40778.2	47114.1	34829.2	32975.2	52079.7	54924.9	39801.2	44774.8	46612.9	37920.3	39250.9	41989.8	44747.8	43515.5	36296.2	51413.6	43266.5	38492.8	48777.7	45997.5	44333.9	40024.8	50555.6	40782.9	44589.2	41436.3	37566.6	56564.8	57676.5	64554.8	63758.7	60767.6	58488.6	44681.2	48622.3	52893.3	55353.1
40	acceptor	8014.13	4022.05	9851.06	12670	8636.92	10259.8	10923.2	11368.9	8250.39	10031.3	5623.52	5900.5	15991.7	10444.2	6402.29	9909.09	9873.97	7524.8	5578.64	8697.34	6895.1	10953.3	8824.87	4056.56	8196.34	15496.9	9959.66	11744.4	9002.2	9534.91	7516.66	13078.1	7925.81	8508.91	11605.3	6197.85	6280.84	8236.41	4524.37	4265.78	18.901	-160.208	-2248.36	-2896.78	-321.688	1110.6	918.987	-2196.67
40	fret	0.13503	0.0843557	0.186368	0.234602	0.17898	0.204982	0.210631	0.208505	0.16066	0.17632	0.098751	0.126586	0.253558	0.230912	0.16259	0.160018	0.152383	0.158737	0.110722	0.15746	0.153647	0.218504	0.173675	0.0832673	0.158737	0.299425	0.16259	0.21348	0.18975	0.163235	0.140539	0.227966	0.165176	0.144247	0.221396	0.121829	0.131392
41	donor	31663.8	32399.7	28019.3	23787.7	28902	29468.4	27165.5	20620.6	25621.3	37427.3	32056.6	28511.3	29042.6	29582.1	26078.1	22195.9	24128.7	25063.1	25172.7	23049.6	23057.9	27146.9	25424.9	22998	32581.7	31285.5	20579.3	28321.1	32071.1	21635.7	24771.7	26547.4	31078.8	26818.2	26456.4	28581.6	23037.2	21546.8	27519	23787.7	24920.5	31169.7	28203.3	35364.2	29958.3	32697.4	27469.4	29654.5
41	acceptor	6502.47	6956.87	6321.63	7507.87	6772.35	5627.72	4413.35	5753.49	7772.04	7889.3	5748.86	10597.6	9598.69	10301.5	11309.9	6847.96	8256.71	7464.31	7255.47	10186	9423.72	6233.8	4542.64	7573.77	10500.7	9530.67	4582.97	4398.96	4338.33	5449.14	5429.72	10631.7	3426.14	5995.67	8614.68	5383.28	4085.68	3641.87	6594.51	6169.73	4599.68	7074.03	6077.49	2714.24	7995.65	8163.69	5009.65	4342.45
41	fret	0.170096	0.176811	0.184336	0.239764	0.189643	0.160492	0.139463	0.218266	0.232545	0.17382	0.151725	0.27098	0.248694	0.258529	0.302463	0.235751	0.255238	0.229351	0.223791	0.306804	0.290419	0.186606	0.151725	0.247879	0.243817	0.233346	0.182071	0.134467	0.118961	0.201131	0.179813	0.286157	0.0989688	0.182825	0.24544	0.158292	0.150273	0.14449	0.193446	0.20577	0.156097	0.185092	0.17756	0.0715352	0.210434	0.19959	0.153908	0.127382
42	donor	36170.4	34530.4	34762	32213.6	35051.7	28463.4	33806	38717.6	26133.5	25993.4	24845.1	28558.4	26027.9	29721	24978.1	32986.7	30465.6	27014.7	31435.8	31618.7	29151	34452.1	32186.3	27460	35434.1	28538.3	30636.6	29678.3	27821	30739.9	27975.4	30641.3	33078.1	30238.8	27464.7	38395.8	37226.1	32664.9	34144.5	35605.1	32002.2	31619.8	29426.5	45733.4	29453.8	33066.2	28719.9	31415.6
42	acceptor	10418.2	9584.52	11703.9	11262.4	8125.23	9050.66	12462.8	8414.27	14502	20046.2	12057.6	15781.4	16223.3	12573.6	16566.7	15594.6	13921.2	10948.1	9735.41	12024.2	17290.1	13625.7	16098.4	17511.7	12470.3	12630.9	14502.6	14968.4	12816.8	8781.58	16959.7	17107.8	5596.93	12212.4	10877.1	10295.3	9050.09	17374.3	8610.14	7329.69	5260.23	5977.79	10674.8	9778.3	8163.62	7771.05	12559.7	8060.51
42	fret	0.223852	0.217245	0.252275	0.258933	0.188102	0.240884	0.269415	0.178741	0.357065	0.435523	0.327018	0.356092	0.384374	0.297166	0.39907	0.321221	0.313512	0.288535	0.236147	0.275143	0.37265	0.283748	0.333785	0.389267	0.259885	0.306774	0.321221	0.335721	0.315439	0.221963	0.377531	0.358037	0.144273	0.287578	0.283748	0.21159	0.195605	0.347351	0.20124	0.170332	0.14149	0.159144	0.266554	0.175936	0.217245	0.189976	0.30389	0.20406
43	donor	11474.1	2028.02	5175.61	3872.82	13274.2	9876.28	3932.49	6229.78	15268.1	5099.37	2.55528	2042.94	6256.3	4905.44	8444.2	4713.17	6397.19	8551.94	3218.1	8434.26	3184.95	186.537	5168.98	725.224	4824.22	8505.53	3176.67	5883.36	10769.7	5410.98	4771.18	9082.34	32738.2	46462.3	30532	42376.5	32289	15357.6	2019.73	-302.425	2089.35	-14.0199	3150.15	1447.9	1724.7	-2601.38	-1383.11	-2714.09
43	acceptor	32583.6	29125.2	40670.8	44915.9	30929.7	31224.2	35921.1	36263.5	28610.2	31533.5	34842.7	33040.5	21713.8	31643	31474.9	30328.1	31498.5	24044	26013.9	33622.3	30810.8	38275.8	32440.7	27704.5	29606	30393.5	35662.3	31484.8	32052.7	30747.7	30639.6	30468.3	19047.9	1433.99	-3814.44	-940.489	1966.54	2306.6	3639.02	2979.75	2570.52	921.314	2420.19	-3069.73	-666.279	3268.86	2380.67	1998.42
43	fret	0.739655	0.93429	0.887466	0.921163	0.699941	0.759859	0.901647	0.853124	0.652116	0.8607	1	0.942212	0.776673	0.865767	0.788783	0.865767	0.830589	0.737294	0.890036	0.799754	0.90683	0.994548	0.861965	0.974244	0.859435	0.781507	0.918549	0.843073	0.747946	0.850606	0.865767	0.77065
44	donor	38163.5	40590.3	35790.3	38902.9	39006.8	44134.6	35522.9	40562	42991.8	35927.7	37912.2	39517.1	33225.2	37166	42169.2	33337.5	47401.6	32828	40326	36536.5	42396	33327.6	34831.6	43767.9	34759.1	39132.1	41936.2	39736.3	44466.1	41334.3	39086.3	31395.8	36244.7	49098.1	34194.6	39402.5	36689.3	28128.8	34278.6	32091.7	36946	42428.9	39850.9	8715.54	4495.27	8717.83	2103.65	5020.8
44	acceptor	11733.4	18463.1	11538.4	12195.8	18072.6	17680.4	13933	16287.3	9485.75	13991.5	15135.1	20390.7	11455.7	19403.7	17878	13278.4	15468.4	17068.8	10884.4	13171.5	9842.18	14015.2	14886	15928.5	15368.2	10252.9	15026.1	13916.9	12641	15486.2	10530.4	10488.9	13321.8	10825.9	19070.8	13857.5	13041.7	11591.3	17438.1	16241.5	15538.6	14208.8	15336.9	41449.3	44667.6	44900.3	40788.2	37475.3
44	fret	0.234951	0.31271	0.243704	0.238447	0.316374	0.286374	0.281885	0.286374	0.180864	0.280089	0.285474	0.34038	0.256038	0.343182	0.298133	0.284574	0.246339	0.342241	0.21241	0.264905	0.18848	0.29632	0.29904	0.266684	0.306317	0.207252	0.264016	0.259579	0.221043	0.272926	0.21241	0.250741	0.268465	0.180864	0.358158	0.260466	0.26224	0.291795	0.337601	0.335744	0.29632	0.250741	0.278295	0.825671	0.909002	0.837884	0.951384	0.881245
45	donor	11005.5	1405.5	10354.2	10636.3	15735.1	11193.3	16471.3	11374.2	611.256	5645.16	7228.37	11016.6	6608.69	11791.3	3681.7	4047.18	13646.7	9669.64	6457.86	1528.91	1808.42	2656.46	5159.44	8259.41	3141.66	10221.3	5429.99	7199.89	2785.14	5521.75	2872.16	4616.23	3199.67	2147.53	3549.33	4885.72	907.648	14661.9	8651.79	9593.17	6187.84	10500.8	13923	13015.9	5844.51	2276.21	8238.32	8014.71
45	acceptor	22281.5	19496.9	9324.27	12035.7	9929.2	12829.2	10802.7	15215.1	24798.8	31884.3	29441.4	22820.8	23271.7	29016.2	26810.1	27622.3	13641.3	26941.8	32087.8	26719.6	27529.7	29105.2	29750.1	22218.6	29745.3	24133.8	24205	21299.8	26331.4	28344	24377.4	26010.9	26287.9	20995.3	29995.6	32987	35477.9	25322.8	21728.3	24166.4	21548.6	24013.7	16933.3	13754.2	19564	31021.4	31414.7	15948.8
45	fret	0.6692	0.933131	0.473435	0.53054	0.387124	0.534524	0.396329	0.572227	0.976285	0.849462	0.803327	0.674051	0.778679	0.710773	0.879368	0.871908	0.499559	0.735739	0.83257	0.946023	0.93866	0.916506	0.852273	0.729028	0.904466	0.702094	0.816551	0.747225	0.904466	0.837262	0.894256	0.849462	0.891467	0.907247	0.894256	0.870974	0.97537	0.633167	0.715585	0.715585	0.776778	0.695339	0.548446	0.513573	0.77012	0.931286	0.791966	0.665317
46	donor	23305.6	33422.1	30188.5	24544.8	21991.5	23770.5	31957.5	25098.2	12240	23189.4	38061.1	26920.7	26684.7	21714.1	18218.8	28299.7	22188.3	25787.7	25940.3	23550.9	26069.3	27541.7	21816.1	31295.8	26786.6	23956.6	21079.5	24147.7	20602.5	22765.8	26407.3	20004.2	24119.9	31501.2	24333.8	21218.5	20201	22074.2	10902.4	26821.6	23177.2	20753.6	22803.6	25605.8	20160.4	22675.3	29770	27351.3
46	acceptor	5382.48	3126.66	4765.09	2642.94	4695.43	6623.86	3273.97	8102.89	16652.2	3964.51	13014	11082.6	7522.95	8593.69	8136.35	7381.22	8930.54	6425.64	4179.6	8808.61	1498.67	1661.49	13372.2	2063.6	6765.19	4339.57	-860.466	4772.97	6226.86	8717.41	4143.43	7028.56	7507.11	5401.46	5773.47	4941.9	4694.09	4686.9	13440.8	7988.57	6509.19	9974.01	9808.89	6498.06	7994.58	3239.68	2619.4	7204.23
46	fret	0.187476	0.0851847	0.136315	0.0974424	0.175727	0.217518	0.0930585	0.244179	0.576175	0.146117	0.254356	0.291667	0.220264	0.283231	0.308609	0.206557	0.286977	0.199273	0.138985	0.272019	0.054772	0.056501	0.380297	0.0616945	0.202002	0.153267	-0.0428873	0.164924	0.232197	0.276685	0.135426	0.259922	0.237721	0.146117	0.192008	0.189288	0.188382	0.174825	0.552522	0.229439	0.219348	0.32471	0.30107	0.202002	0.284167	0.124775	0.0808199	0.208381
47	donor	32854.9	32469.3	18954.8	33769.6	22849.8	22087.2	26344.9	33052.8	17059.5	29827.2	25113.5	24434	23586.7	28320.4	31280.8	21440.6	25125	19400.6	27749.9	27382.9	34559.5	22115.8	32951	23768.8	27253.9	28171.4	28865.2	24253.3	34041.9	21376.1	31074.4	25492	31183.3	22068.5	34099.3	28762	25520.6	24849.7	23927.9	22706.5	21182.6	24558.7	28053.8	30426.4	26492.6	21863.5	25996.6	27355.6
47	acceptor	19154.3	9469.87	19034.3	15288.7	9923.58	12800.9	8989.45	5802.44	11319.6	4835.3	9586.14	8376.11	5554.91	8454.61	13666.5	9958.11	13984.3	8876.55	5316.73	14589.9	9352.15	18617.3	6599.02	7096.43	6820	8750.33	3815.27	6488.82	15263	11917.4	7773.09	5712.44	9371.17	7341.6	11688.6	10231.3	8209.68	9088.97	12361	4085.53	9678.33	5367.33	7601.53	8181.65	10306.7	11347	9508.27	12822.9
47	fret	0.367932	0.225438	0.500656	0.311603	0.302572	0.366991	0.25475	0.149047	0.399319	0.139385	0.276685	0.255622	0.190878	0.229711	0.304374	0.317049	0.357614	0.314324	0.160405	0.347368	0.212695	0.457115	0.166937	0.229711	0.200067	0.236574	0.117102	0.211005	0.309793	0.357614	0.200067	0.183404	0.231424	0.249534	0.255622	0.262611	0.243471	0.267876	0.340884	0.152282	0.313416	0.179269	0.213541	0.21185	0.280235	0.341809	0.267876	0.318869
48	donor	11074.1	13060.7	26102.8	15097.6	21602.1	18328.1	16468.6	24117.3	20918.9	37752.1	28446.4	20066.4	23372.4	17287.9	21666.1	20046.9	20074.4	21590.6	16545.2	18439.1	21843.5	19834.1	18583.3	21722.2	23133.2	18532.9	20529.8	18345.3	17996.3	19243.6	23350.6	17401.2	22038.1	22739.5	20753	21890.4	27402.7	18653.1	19729.9	20901.7	25009.9	25849.9	32493.9	20949.8	22603.4	29065.4	27213.9	24753.6
48	acceptor	19380.6	15770	17547.3	20695	15357	14488.5	17282.7	19208	19641.2	18075.7	18985.8	15397.5	20184.8	18043.3	13038.4	16433.5	21672.9	17548.9	16200.3	16990.8	13270.9	20642.1	14651.7	16473	20151.2	18324.5	16125.8	17959.4	17337	17958.9	15333.9	14240.5	14886.9	17243.6	17567.1	9178.36	19572.6	25092.2	18590.3	20642.8	21468.6	15841.9	13771.4	19271.5	17106.4	14523.5	17969.9	15451
48	fret	0.636126	0.54664	0.402017	0.578017	0.415831	0.441569	0.51242	0.443554	0.48438	0.323683	0.400046	0.434629	0.463435	0.510413	0.375465	0.450505	0.519451	0.448518	0.494379	0.479386	0.378409	0.510413	0.440577	0.431657	0.465426	0.497383	0.439586	0.494379	0.490378	0.482382	0.396106	0.450505	0.403002	0.431657	0.458458	0.295539	0.416818	0.57396	0.485379	0.497383	0.461444	0.380373	0.297476	0.479386	0.430667	0.333419	0.398076	0.384302
49	donor	22298.7	17972.5	14053.7	18074.6	16160.1	17853.6	19081.3	21376.2	17034.3	22871	16150	18554.9	17745.8	15472.2	25316.4	17543.8	17817.6	20162	17496.7	20999.2	11789	14449.8	15386.9	9853.18	22268.4	18457.3	17116.2	16015.3	17402.4	21674.7	16355.4	15044.6	22041.7	17516.9	23241.4	28464.2	25985.2	26814.6	22064.2	23363.7	28041.2	25658.7	28139.9	27596.8	24321	26087.4	24714.9	28573.1
49	acceptor	10337	6100.66	-466.811	7980.57	10370.2	8195.13	10662.9	2496.99	7997.67	6542.26	7843.94	10573.1	7370.07	8503.58	5410.23	2548.74	12216.8	9216.29	6764.21	10192.4	10052.8	6725.21	14494.2	11204.6	3093.54	8561.93	9284.03	5402.37	10523.6	3872.36	7451.32	6022.12	10222.2	10219	11459.5	4789.56	-2534.65	2907.95	-420.473	1547.09	1384.26	-1158.15	2237.52	3288.4	3855.06	477.827	-685.053	-1292.3
49	fret	0.317016	0.253377	-0.0348283	0.305918	0.390524	0.314999	0.358332	0.104151	0.319034	0.221993	0.327101	0.363365	0.293805	0.354306	0.176355	0.12655	0.406602	0.31399	0.278653	0.327101	0.459774	0.318025	0.484809	0.531798	0.122479	0.317016	0.351285	0.252365	0.376446	0.151975	0.312981	0.285725	0.317016
50	donor	25458.9	24478	25471.7	20591.4	29470	23254.6	21725.5	25677.2	24908.8	23753	18643.6	21729.3	24312.1	27904.5	29838.9	24073.4	23396.9	26934.5	25067.1	32109.6	31969.2	22614.5	21823.8	24059.4	20137	24005.8	23305	22963	19311.2	29408.7	30759.8	24832.9	23265.5	26808.7	21096.9	26710.4	30697.9	26513.9	29331.5	29329.6	33040.1	28999	26626.8	38419.4	31839.6	30766.8	39494.2	36931.2
50	acceptor	8174.2	14443	10855.6	12369.1	17898.4	11956.5	11609.4	18786	15799.4	8053.75	378.957	11740.1	9457.42	11003.4	8957.03	13178	12648.7	10504.8	10489.4	16483	5872.19	12659	6280.32	16285.1	15635.9	9056.52	10841.4	11885.5	853.968	-4731.33	8486.04	14930.1	13494.8	9207.41	5259.43	10581.2	6928.72	4992.48	15764.5	-1472.98	-2265.14	-791.409	1544.83	-842.458	2682.74	-5163.96	438.896	-3533.72
50	fret	0.242763	0.371238	0.299062	0.375336	0.377383	0.339386	0.348651	0.422246	0.38761	0.25323	0.0196183	0.350708	0.280356	0.282438	0.231228	0.353793	0.350708	0.280356	0.294911	0.339386	0.155156	0.358929	0.223875	0.403935	0.43746	0.274108	0.317708	0.341446	0.0424247	-0.191907	0.216513	0.375336	0.367142	0.255321	0.199651	0.283478
51	donor	-468.146	5358.43	11268.3	5688.72	-1090.52	503.632	-1086.43	1681.5	5904.37	4662.35	2811.61	1506.8	7629.55	11216.4	7610.44	9579.93	4398.93	3118.7	4981.73	8366.57	3398.49	3615.51	4007.22	9676.84	5160.52	10977.5	4710.12	7737.38	9620.88	6428.48	10226.9	9069.48	4364.81	8732.36	2232.91	9267.38	8964.38	2625.99	6290.63	4618.68	7678.69	2949.46	2572.76	8032.18	238.85	2668.3	4042.71	2814.34
51	acceptor	29575.5	33996.9	29006.1	23909.9	26309	31670.9	25427.7	27470.2	21983.4	26111.6	29161.2	30584.8	28268.5	30122.8	24693.7	23655.4	27586.9	28485.1	25895	32767.1	21505	30371.5	21587.9	29784.6	29482.4	22837.4	20241.8	26283.1	33672	25523.8	25834.9	23502.6	30330.3	28558.7	27290.2	28000.8	28259.5	26187.4	23256.8	19610	21287.6	27840.5	27021.9	23774.9	27119.3	28075.4	24571.6	25719.7
51	fret	1.01576	0.863825	0.720053	0.807478	1.04291	0.984291	1.04518	0.941926	0.788138	0.848584	0.912065	0.953037	0.787066	0.728507	0.764615	0.711616	0.862735	0.901056	0.838814	0.796714	0.863825	0.893365	0.843154	0.755028	0.850758	0.674894	0.810709	0.772086	0.777431	0.798862	0.716888	0.721109	0.87365	0.765682	0.924207	0.751837	0.759287	0.90876	0.787066	0.809632	0.734857	0.904356	0.913168	0.747586	0.991017	0.913168	0.858376	0.901056
52	donor	30945.6	43127	36579	41851	31547.4	33029.3	39088.5	36828.9	34636.8	44809.9	29888.1	36541.3	38269.8	33957.9	34852.1	40603.3	36208.2	33398.5	60229.9	50988.6	59965.9	38892.1	56114.4	58114.8	64386.2	53542.1	55608.4	54396.9	54723.8	57747.1	45359.9	62685.9	54156.5	63817.3	54480.2	45776.3	44720.3	57571.1	65362	57230.1	58900.5	65795.7	59406.5	54733.2	59448.9	48794.9	54175.3	51175.6
52	acceptor	21244.1	17681.2	16521.1	12578.8	16190.2	11264.6	11260.2	19361.7	16735.3	16058.4	12553	10564	9521.62	14791.7	15775	15810.6	22722.2	15130.5	-4175.96	4448.94	-1673.2	-1150.04	-671.576	-508.409	252.822	-830.85	5475.87	2605.97	192.908	-801.011	1274.57	344.242	4801.1	1934.19	3303.07	1663.16	6491.43	-1435.33	2125.65	905.734	485.867	286.61	2290.39	4323.89	-622.969	4287.57	3881.94	-1781.04
52	fret	0.407082	0.290333	0.310932	0.23118	0.339187	0.254361	0.22354	0.344723	0.325444	0.26392	0.295678	0.224387	0.199215	0.303733	0.311835	0.280589	0.385991
53	donor	102721	87082.5	94383	107903	78613	103495	86736.1	128248	120600	121605	117749	15381.7	-6416.25	1884.21	920.337	-4644.5	-3961.42	844.805	8082.87	3990.93	6028.69	17196.1	-2785.72	1046.77	3834.94	2880.92	-3900.66	3644.46	-6718.38	5215.89	6626.39	-5930.21	-5035.3	721.652	-4657.64	-4545.98	-2312.82	-4713.46	-1986.05	-747.965	1987.66	-8862.87	-7866.16	-3715.11	1478.63	-3496.72	-6358.78	-4642.86
53	acceptor	17403.1	26359.7	30518.5	21600.5	24738	15106	21102.7	3182.59	-4958.14	-2988.39	281.116	862.537	-4177.45	1435.91	5524.55	2432.78	1940.79	-3633.88	2237.99	-263.528	2837.16	-2141.29	-2147.87	2967.73	3191.93	628.78	1952.97	-2885.26	959.768	-1070.37	-804.842	-1121.42	-1270.95	-3375.41	2907.1	-2073.14	-1710.59	-3328.79	2842.14	-1455.29	745.163	-1528.97	5386.45	10454.5	-3170.85	1015.95	797.24	1364.69
53	fret	0.145016	0.232524	0.244108	0.167163	0.239128	0.127051
54	donor	72288	54002.8	65418.2	67392.6	47517.2	68268.9	71583.5	54666.7	72206.8	69923.1	51470.7	84040.8	61458.4	71058.7	48670	68240.8	72769.1	78481.5	97404	71471.1	58884.2	77669.2	54337.1	43017	64835.5	55844.4	82258.5	63789	89748.5	70365.1	79179.7	75838.5	67951.8	76543	70793.1	77392.8	68626.6	84042.4	66827.1	74931	60002.6	70602.6	69057.7	84307.9	55000.9	55161.8	67858.1	69795
54	acceptor	10236.3	15406.5	9634.63	11548.8	14431.4	13570.9	4905.83	12601.7	11031.1	14822.3	11782.5	17348.4	19160.8	14509.2	11200.3	6516.77	14295.6	7861.79	13235.1	18258	15602.2	5160.35	15863.5	12991.4	11135.9	10698.5	12154.1	13295.5	11860.1	7839.37	11077.9	9444.38	12296.1	9172.66	9069.14	11283.2	9711.93	11556.5	8782.58	15738.7	9958.08	15651.1	11531.4	11020.5	11553.6	7888.61	7504.83	10005.9
54	fret	0.124167	0.221741	0.128214	0.146008	0.232607	0.16583	0.064287	0.187246	0.1323	0.174791	0.186582	0.170929	0.237764	0.169649	0.187246	0.0872975	0.163934	0.0909981	0.119588	0.203482	0.209722	0.0623093	0.226058	0.231875	0.146614	0.16079	0.128795	0.172212	0.116752	0.100128	0.123017	0.110579	0.153337	0.10725	0.113374	0.127054	0.124167	0.120728	0.116187	0.1735	0.14238	0.18129	0.142981	0.115623	0.1735	0.125319	0.0995855	0.125319
55	donor	8455.2	6105.28	5269.87	11366.3	1841.1	3253.1	11097.2	9926.13	-3130.36	-7699.5	9582.75	1943.61	-3143.17	17803.6	16619.7	14523.5	-4324.54	7058.58	12803.9	918.562	-4757.62	13265.2	-7932.69	13352.3	2535.57	4762.48	9941.51	-941.893	-6064.55	5608.14	6730.56	2963.53	8942.09	12593.8	10320.8	-10866.9	-1287.84	10231.1	11432.9	5423.63	11245.9	2776.45	10630.9	10172.1	-1413.41	288.159	11750.7	12165.9
55	acceptor	41135.9	46070.8	50422.4	38306.4	44121.2	40488.7	47607.3	41474.7	36284.6	39052.9	42359.3	41299.7	45955.4	56784.3	48893.8	52471.1	46307.5	40741	40662.6	41900.7	45135.9	50922	48905.9	45691.2	42620.6	37850.1	49108.7	44530.3	50033.8	50077.4	42073.4	40547.5	49465	42429	45175.3	44443.6	41877.3	52278.1	48225	49975.2	54203.6	55521.2	45817.8	40027.8	46799.9	48759.4	44424.3	48498.2
55	fret	0.829543	0.882265	0.905466	0.770568	0.960483	0.925767	0.811026	0.806449	1.0954	1.24598	0.815623	0.955203	1.07371	0.761797	0.745917	0.783872	1.10339	0.851581	0.760342	0.978268	1.11751	0.792842	1.19293	0.773509	0.942985	0.888842	0.831102	1.02217	1.13798	0.898785	0.86278	0.932621	0.846819	0.770568	0.814088	1.32289	1.03145	0.835791	0.807972	0.90212	0.827987	0.951698	0.811026	0.797357	1.03145	0.994527	0.791341	0.798867
56	donor	18597.7	30316.3	34450.5	35125	30388.9	23310.4	28236.3	35811.4	34628.9	41138.8	27702.3	33923.1	30956.2	29467.4	31228.5	26352	33542.3	28025.2	34784.1	25440.4	37113.8	58782.7	64825.1	49887.8	69735.7	71188.5	55222.5	49367.1	54787.7	67081.6	66668.2	47580	53336.8	66440.4	57281.2	69034.5	65438.4	64986.9	68475.9	59792.1	39080.7	-698.195	-1388	-2428.03	6728.51	-531.07	-2078.47	-755.457
56	acceptor	41865.4	31277	28396.6	22434.9	31647.3	27477.7	32275.5	24100.5	28048.5	31728.7	33769.6	22978.7	28164.3	34464	24727.3	33256	25233.6	28131.3	27638.7	25284.2	30419.5	10577.3	-460.466	-5420.94	-1561.48	-1739	1693.19	467.521	-512.263	-611.714	-1977.93	-819.355	-3266.78	-2911.78	-1548.29	-3177.24	4142.24	-102.764	-1231.26	-933.202	-280.107	453.614	1995.14	2230.86	91.314	2007.48	350.38	-4130.47
56	fret	0.691935	0.507961	0.452029	0.389997	0.509973	0.541271	0.53317	0.402721	0.447071	0.435198	0.549394	0.403701	0.475907	0.539244	0.44212	0.557527	0.429274	0.500928	0.44311	0.498921
57	donor	21802.8	13448.6	25742.3	21842.3	18362	15577.9	20124.4	20596.6	14929.9	20959.2	19448.4	16558.5	17355.4	18800.4	18445	18487	14580.2	19173.9	18015.4	21228.5	16575.6	13419.6	25783.3	17091.3	19123.6	22716	16785.7	16450.1	20942.6	17692.1	14843.2	16771.2	16883.8	17140.6	23030.9	19361.7	20680.1	18306.4	16978.8	19156.8	23964.8	15839.4	23339.6	25715.9	20494.9	20699.8	26112.8	17073.7
57	acceptor	9637.23	9891.76	8897.89	11241.6	12178.5	14349.7	4392.87	4305.83	12405.4	11486.2	8738.47	10988.2	11928.9	9474.46	11358.8	11187.9	11684.1	9330.73	6593.24	5464.22	10238.4	6699.24	9048.28	8538.67	12794.1	11687.6	11504.4	10963.1	12171.8	11124.5	12538.8	8420.11	11140.6	9482.15	7115	11154.7	10429.5	6394.94	12255	12893.2	8006.95	13283.7	14150.3	7697.72	7887.81	10240.4	6192.25	10663.9
57	fret	0.307005	0.424039	0.256625	0.339739	0.398737	0.479418	0.17891	0.172661	0.454291	0.354019	0.310079	0.398737	0.407854	0.334633	0.381489	0.377425	0.445227	0.327479	0.267962	0.204897	0.381489	0.33259	0.259718	0.333611	0.400764	0.339739	0.406842	0.399751	0.367257	0.385551	0.458317	0.334633	0.397724	0.356057	0.235973	0.365222	0.335654	0.258688	0.418983	0.401777	0.250435	0.456304	0.377425	0.230802	0.278254	0.330546	0.191394	0.384535
58	donor	25763	22536.7	24421.2	28519.8	27613.3	37031.3	27263.1	18810.6	26965.5	24477	23462.7	24807.7	21278.4	25360.2	26153.3	24648.9	22223.4	24448.8	24343.7	12439.4	22485.8	21685.6	29744.5	29534.6	23403.1	28824.4	33272.7	24467.3	35509.6	44823.5	55454.8	48859.2	60725	58369.4	63660.6	53348.6	67311.4	49097.2	-658.128	1103.28	-4668.33	-476.511	3386.77	5378.58	-1400.32	5729.89	221.221	1309.29
58	acceptor	35227.8	33202.3	37002.9	30242.2	29251.2	28566.7	31946.7	30774.1	27864.3	39202.4	29514	26415.7	36365.8	38132.9	32045.4	35131.3	29054.1	35751.3	38305.3	39682	41786.2	40014.6	27478.2	35013.9	29658.7	35516.4	37773.8	28896.2	10477.8	-492.78	5468.79	-3045.46	-1606.12	1056.18	-3259.43	3842.35	3469.41	-10.077	2289.31	3930.25	1650.64	-178.74	-1413.6	3647.84	508.959	5048.57	2753.18	3066.94
58	fret	0.578043	0.596137	0.602172	0.514863	0.514863	0.435958	0.539907	0.62029	0.507857	0.615256	0.556956	0.515864	0.630364	0.60016	0.550938	0.588093	0.566995	0.594125	0.611229	0.760837	0.650529	0.648512	0.479861	0.542915	0.558963	0.551941	0.531889	0.541912
59	donor	7100.5	3627.3	9203.89	7685.28	9561.29	1977.97	7377.94	4992.25	8557.92	5005.46	12401.7	6897.46	5221.71	6102.7	7139.44	14480.8	9715.66	6104.09	7173.51	11408.8	6738.23	8119.17	4189.13	4317.08	11271.8	9779.63	3752.46	6965.61	12173.7	2715.72	11265.6	606.767	6766.05	3371.42	6684	4396.34	5959.46	1649.77	6675.65	986.421	6371.1	4939.4	7049.05	9652.38	2763.7	2643.4	4494.39	10009.1
59	acceptor	36545.1	28846.2	33096.2	23258.2	30328	31794.5	35764.3	29179.1	37682.9	45947.8	36223.2	41511.3	43490	40817.3	33971.5	42288.5	37774.5	38138.4	40998.8	28929.4	39255.7	32631.6	41782.5	28652	35788	45053.6	44444.2	34231.4	30276.1	40860	37150.2	33839.8	32646.2	36620.9	39053	33390.6	34275.6	39868.4	35175.9	32948.5	41542.2	39332.7	37915.5	35688.8	39069.2	34818.4	32669	31046.3
59	fret	0.837471	0.888537	0.782559	0.751625	0.759863	0.940944	0.829161	0.854114	0.814637	0.902134	0.74545	0.857238	0.892719	0.869745	0.826047	0.744422	0.794963	0.862447	0.850991	0.716693	0.853073	0.801171	0.908416	0.868702	0.760894	0.821896	0.922043	0.831238	0.713618	0.937791	0.767079	0.982032	0.828123	0.915751	0.854114	0.883313	0.852032	0.959884	0.840589	0.970424	0.866617	0.888537	0.843709	0.786692	0.933589	0.929388	0.879136	0.755743
60	donor	19153.3	18653.7	22710.8	20972.7	14744.5	15351.7	20808.9	20301.3	24774.3	12162	22803.6	20572.9	20293.3	17569.9	23470.4	18831.3	9104.03	10319.7	5834.09	14592.1	13377.6	17086.4	9106.32	17481.7	11489.5	10320.8	11144.6	17100.1	18099.2	8832.49	14910.6	13661.8	16388.6	20553.4	19269	15236	15359.8	17897.6	13896.6	15059.6	19839.6	16151.5	16390.9	9862.51	6172.09	10118	11783.9	15266.9
60	acceptor	42089.1	36677.1	34202.5	35605.8	39487.8	41195.1	39880.9	30731.4	40258.9	39971.7	35276.9	33829.5	38914.3	39234.4	36378.3	38495.2	40715.3	46882	39842	37911.2	37616.4	38538.2	42560.1	43450	39354.9	38626.8	33820.1	27482.9	40232.9	40879.4	44051.8	42048.6	31431.9	35289.2	38127.7	41130.6	36790.2	42853.8	33559.1	36093.8	39832.9	40054.3	37539.9	36764.2	41326.5	34716.4	35701.4	41316.4
60	fret	0.687465	0.662683	0.601086	0.628928	0.728042	0.728042	0.65673	0.602081	0.618989	0.766561	0.607055	0.621971	0.657722	0.690437	0.60805	0.671608	0.816821	0.819773	0.871855	0.722109	0.737926	0.692418	0.823707	0.713206	0.774453	0.789242	0.751755	0.616006	0.689447	0.822725	0.746817	0.754717	0.657722	0.631908	0.664666	0.730019	0.70529	0.70529	0.707269	0.70529	0.667642	0.712217	0.696381	0.788257	0.869892	0.774453	0.751755	0.730019
61	donor	15839.3	14670.5	10676.9	18679.5	12484.9	16106.5	13033.3	17473.1	20021.6	17039.1	15970	13994.5	4925.3	13750.1	16019.9	14984.3	9632.38	19173.2	17016.2	19697.9	12206.2	10705.5	14160.5	9083.94	11693.7	16901.8	16166.2	15366	10530.6	15408.5	16471.9	10354.1	16416.3	10775	14436.7	19109.5	21274.6	13537.6	23161	20296.2	16743.3	15156	23908.9	19518.1	21180.6	14886.3	22455.7	12454.7
61	acceptor	8272.47	3858.35	7116.32	7458.98	11638	5070.28	8262.61	2527.63	6659.8	6877.51	10776	6135.83	14237.3	3990.43	6179.81	12784.8	7028.05	6962.22	6156.77	8564.73	8121.58	6220.17	5390.15	10609.4	14103.3	5473.51	3990.48	5581.23	5249.81	5235.21	8411.25	10643.1	4816.94	9857.31	6351.32	7707.39	4466.59	10839.3	7542.32	8015.65	4573.34	9747.12	5725.75	7846.3	6207.34	3461.44	3202.23	6422.96
61	fret	0.343276	0.208579	0.39988	0.285163	0.482748	0.239285	0.388262	0.12655	0.249304	0.287943	0.402793	0.304686	0.743194	0.224786	0.278687	0.46078	0.4223	0.266707	0.265788	0.30282	0.39988	0.367103	0.275918	0.538515	0.546729	0.24474	0.197835	0.266707	0.332865	0.253872	0.337592	0.506933	0.226594	0.477738	0.30562	0.287016	0.173832	0.444922	0.245651	0.283311	0.214869	0.391162	0.193372	0.287016	0.226594	0.188918	0.124817	0.340432
62	donor	30746	33385.3	30981.3	26290.4	30613.1	26987.2	29446.9	29699.2	32534	23390.9	28802.4	23739.8	33480.8	25518.7	26705.3	28163.6	36645.2	26149.5	20475.4	27556.6	32598.8	29775.4	26223.4	30363	35564.2	31700.8	33062.5	28653.5	28488.7	32952.3	28360.2	29852.6	31330.3	24262.7	24003.5	25709.6	31948.6	32189.6	27445.3	26380.2	30973.4	24179.7	31695.1	26649.6	24428.6	22577	26924.7	33822.9
62	acceptor	6938.86	13364.7	9375.67	10860.9	14890.4	13193.2	13456.2	6294.47	11591.6	10402.5	12610.8	10437.9	9940.07	10647.7	10914.1	12650.1	14768	7490.69	11753	8979.92	13681.4	4828.29	12333.3	13789.7	13368.5	7419.93	16850.5	11935.2	3007.54	8332.94	8918.18	8393.99	9542.06	13533.7	11930.5	11270.6	14528.8	9976.68	10992.9	5349.82	8024.61	11251.4	11462	7865.42	15760.4	10223.1	12222.8	9416.83
62	fret	0.183901	0.286228	0.232071	0.292243	0.327324	0.328326	0.313293	0.174867	0.263165	0.308282	0.304272	0.305275	0.229061	0.294248	0.290238	0.310286	0.287231	0.223041	0.364393	0.246115	0.295251	0.139722	0.320309	0.312291	0.273193	0.189924	0.337344	0.294248	0.0955187	0.201968	0.239093	0.219028	0.233074	0.358383	0.332334	0.305275	0.312291	0.237087	0.286228	0.168843	0.205983	0.317302	0.265171	0.228058	0.392434	0.311289
63	donor	38967.4	45564.9	40625.4	38142.6	42362.8	44442.3	31321.7	38281.5	47181.1	43224.4	36177.6	34285.5	31025.6	35654.8	40085.8	34445.2	38158.5	39258.5	42887.3	33036.6	38384.4	42179.6	43530.5	33789.4	39247.6	39403.2	33233.1	34732.2	35832.2	45240.4	39528.7	28061.8	37880.8	41380.7	35071.8	43397.5	37307.8	39338.8	40836.2	47878.7	41505.4	38770	40479	39216.7	27846	33296.7	34159.2	36490.5
63	acceptor	15017.3	21177.7	12742	12105.1	18047.5	12472.6	19854.1	13285.9	12423.2	13607.2	17268.8	19998.4	16902.5	16005.7	15510	16795.8	15566.2	20458.4	11644.3	16327.6	14885.6	10830.2	12232.6	16688.5	12848.1	15688.9	10728.1	17381.4	11401.7	11940.5	12588.1	10624.7	16318.6	13607.4	18633.2	12249.6	13328.7	13320.6	9876.57	18779.1	17610.2	16296.7	12222.8	13359.9	16404.7	12393.5	15411.5	10610.3
63	fret	0.277854	0.317664	0.238745	0.240544	0.299053	0.219	0.38787	0.257758	0.208305	0.239647	0.323276	0.36868	0.352495	0.310204	0.278772	0.327963	0.289815	0.343028	0.213646	0.33078	0.27969	0.203864	0.219	0.33078	0.246874	0.285207	0.244156	0.3336	0.241446	0.209194	0.241446	0.274187	0.300907	0.247779	0.34681	0.219894	0.263221	0.253217	0.195009	0.281528	0.298127	0.296282	0.231545	0.254124	0.370592	0.27144	0.311135	0.225264
64	donor	49405.7	39134.7	48920	40919.1	37609.1	51233	40951	42829.8	45829.5	47768.4	50352.4	44578.6	38739.9	49340.7	41772.7	46937	43002.7	42567.4	41564.2	43866.1	51104.2	57600.3	65520.2	61304	59596.8	64474.1	69053.4	61655.9	69740.2	63186.5	66016.9	76709.7	66757.7	54690.1	64165.1	59708.4	68009.8	61084.4	65521.5	61118.8	55314.3	55115.7	68755.4	65251.7	73450	64325.8	61205.9	59351.6
64	acceptor	20480.7	14286.4	19566.3	18631.3	17375.7	18604.6	22132.3	16061.8	18786.6	16046.8	20882.6	17367.2	16087.1	13620.2	20222.1	19625.9	19884.8	18205.5	23115.6	17396	11654.1	2122.06	-1859.68	-1710.94	405.172	-1047.45	1314.13	-1918.49	-3456.53	3521.48	-3668.83	-2667.56	-3510.3	-2452.7	-4520.6	1205.43	891.185	-4621.26	-412.956	-443.967	989.122	-173.138	5253.67	-4268.86	1870.64	1323.69	584.709	4941.15
64	fret	0.293094	0.267471	0.285484	0.313141	0.31601	0.266525	0.350651	0.27315	0.29119	0.251426	0.293094	0.280736	0.293094	0.216734	0.326564	0.294999	0.31601	0.299765	0.357422
65	donor	68297.5	62229.1	64958.7	63717	69751.1	54021.7	54235.1	52607	59854.8	59530.7	56816.7	53230.2	55154.3	54995.4	58745.5	66981	65884.2	49816.7	59628.9	63005	50826.2	57053.5	58860.8	47705.6	56865	53654	53027.7	46742.7	51287.4	60884.6	53021.4	51041.2	49916.4	47493.7	47914.4	49246.4	45725.4	58176.8	62944.3	54595	59979.4	59569.7	54492.2	50792	62704.3	63044	58119.2	62980.1
65	acceptor	4608.86	10450	6229.06	2565.44	9870.09	5957.58	8915.59	9965.37	11988.8	4977.2	7862.96	11172	6761.62	12835.2	6112.69	511.993	6503.37	7440.82	8980.37	9234.3	11829.7	7230.68	10001.2	14199.6	8350.92	9470.86	6362.87	13691.6	3906.46	1758.86	2731.11	4931.22	17896.6	10187.3	7555.06	16463.2	9032.74	4785.68	-3523.89	6593.9	464.693	2317.19	826.265	755.128	1423.38	6658.25	6728.64	7884.85
65	fret	0.0628822	0.143754	0.0878398	0.0389252	0.123783	0.0998203	0.140758	0.159732	0.166722	0.0768581	0.121786	0.173713	0.108806	0.189693	0.09383	0.00798416	0.0898365	0.129774	0.130773	0.127777	0.188694	0.1128	0.144752	0.229646	0.127777	0.149745	0.106809	0.22665	0.0708683	0.0279457	0.048907	0.0878398	0.263612	0.176709	0.135765	0.250625	0.164725	0.0758598	-0.0588753	0.107808	0.00798416	0.037927	0.0149705	0.0149705	0.0219571	0.0958267	0.103814	0.110803
66	donor	39393.5	45295.3	38123.1	37685.2	38917.1	44654.1	24222.6	23491.2	27501.9	39548.6	39368.2	18425.4	30442	38281.9	38514.1	42002.7	30304.9	31451.3	18358	21867.1	26220.8	14731	15244.7	34532.2	22945	16712.4	35143.3	23408.2	20885.5	22335.1	34113.5	32399.3	21502.6	20487.3	17248.9	17772.2	21286.1	19019.7	42570.5	54920.4	46025.5	48500.1	50673.9	38869	49472.1	40793.7	45157	52128.3
66	acceptor	9365.61	-160.791	7431.76	6761.77	9850.49	1943.33	20483.8	15692.6	24777.7	7131.96	5665.12	8264.27	6891.01	7867.1	10972.5	6325.88	3816.82	25233.6	19872.6	17011.9	25378.1	23007	29893.3	15571.6	27526.2	22169.7	21424.2	22487.7	20186.5	20179	14872	13213	27225.1	23556	22423.2	21636.4	26787.8	28240.9	-4190.56	1016.14	-451.786	1699.2	-1269.3	355.041	1682.01	2697.26	-3450.94	-760.041
66	fret	0.192062	-0.00392512	0.163411	0.152551	0.20195	0.0412492	0.458324	0.400473	0.474305	0.152551	0.125914	0.30996	0.184155	0.170323	0.221735	0.130845	0.112113	0.445346	0.520304	0.437363	0.492295	0.60953	0.6618	0.310953	0.545337	0.570394	0.378562	0.490296	0.491295	0.474305	0.304003	0.290108	0.558363	0.535321	0.56538	0.549345	0.557362
67	donor	87208.1	83614.4	87318	78711.4	80266.2	73178.7	89751	80112	78527.2	75079.1	85457.6	70710.1	99445.6	90711.9	87983.4	82213.7	88239	102831	108433	117393	102604	115397	119060	121655	109143	119379	112625	119275	113272	115125	111092	117667	115717	113098	115141	105160	115291	117171	120565	29201.7	3538.75	-1178.63	8851.52	2013.88	-3414.54	5200.69	4766.64	9127.08
67	acceptor	41126.4	38045.7	47128.4	44466.2	38963.7	30007.3	32690.9	35353.6	34712.5	41318.4	34331.3	35565.7	16100.2	20280.4	27439.9	24113.8	27769.1	5058.27	5413.64	3046.92	3650.41	2799.46	98.199	6159.73	779.905	177.765	1809	3783.06	4881.4	488.304	6457.45	1468.08	3407.64	3243.18	4557.57	-5055.09	-88.875	1838.8	565.573	3156.57	-232.972	1257.77	3700.33	-1839.08	-2506.1	-4632.25	1031.92	-1377.15
67	fret	0.320572	0.312271	0.350396	0.360761	0.327055	0.291219	0.266828	0.30584	0.306757	0.3551	0.286683	0.334492	0.139534	0.182671	0.23745	0.226885
68	donor	23655.7	22511.6	32452.3	29981.6	20433.7	28506.8	28685.2	25070.4	26252.6	23545.5	28727.3	25655.5	22499.5	33662.5	32815	34083.3	25196.6	24585.5	22189	26240.6	30973.5	34778.6	36764.4	31873.2	33273.8	30133.9	26687.4	26677.4	29715.1	35377.8	29192.1	29442.6	26529.1	35357.7	35572.1	27827.6	29138	23765.9	30314.2	26751.5	28611	26593.2	31871.2	30400.4	28186.2	27448.9	38609.9	25545.3
68	acceptor	13250.3	11799.7	11878.8	5431.75	13507.5	13223.2	15775.7	7737.3	10300.8	7183.08	6057.15	6766.85	13843.1	8371.09	7223.74	15521.3	11083.8	14524.7	9134.45	8616.73	8918.63	4870.78	10435.7	13211.2	7074.6	9401.22	9557.84	13125.5	6240.38	4879.23	15268.9	10467.4	16283.3	11235.7	16597	12144.3	9849.62	7896.94	11167.7	14146.1	8929.12	8917.26	8041.65	7929.31	14059.6	12003.9	4472.48	7407.62
68	fret	0.35891	0.344094	0.268079	0.153637	0.39765	0.316756	0.35519	0.235514	0.282057	0.233822	0.174408	0.208721	0.380503	0.19882	0.180061	0.313154	0.305086	0.371072	0.29175	0.247418	0.223721	0.12313	0.221209	0.292635	0.175214	0.238055	0.263754	0.329443	0.173603	0.121586	0.343173	0.262024	0.380503	0.241452	0.318561	0.304193	0.252554	0.249127	0.268948	0.345937	0.238055	0.250839	0.201288	0.207065	0.33309	0.304193	0.103969	0.22456
69	donor	17165.1	12823.5	16880	12405.4	12709.3	16506.7	8388.87	11327.6	23066.2	14930.7	20421.9	15347.7	22526.7	14412.4	15146.2	20829.4	8676.27	16249.9	17739.9	7715.14	10036.7	10115.6	12684.5	13842.4	16325.3	20748.1	8589.11	25557.3	13669.2	20510.2	7874.15	8653.89	11987.2	17844.7	10358.3	3364.14	8578.51	12311.1	16236.9	9187.46	7412.43	9851.77	11149.8	12480.7	14167.4	8530.22	-1406.19	5924.8
69	acceptor	19891.3	20159.8	18979.8	27775.2	17476.6	14684.9	26845.9	24493.3	13381.8	17185.2	16752.3	17010.8	20466.5	17566.7	21596.7	18694.9	19918.9	18357.8	21212	28728.7	27232.5	26550.9	34450.3	31995.7	26590	30118.4	30801.9	17023.9	25274.3	23912.9	26711.7	37474.6	28854.4	27155.6	28231.5	34774	26141.9	22390	29785.2	21397.2	21193.4	31615.4	20905.2	19634.8	26522.2	32750.1	30029.5	33083.8
69	fret	0.536888	0.610732	0.528922	0.691692	0.579407	0.470652	0.761533	0.684059	0.366944	0.534898	0.450344	0.525931	0.475712	0.549795	0.588245	0.472677	0.696454	0.530915	0.544836	0.788534	0.730556	0.72396	0.730556	0.698357	0.619493	0.592165	0.782035	0.400115	0.648546	0.537882	0.77273	0.812568	0.706908	0.603911	0.731498	0.911577	0.753111	0.645651	0.647581	0.699308	0.740911	0.762467	0.652402	0.611706	0.651438	0.793168	1.0494	0.848315
70	donor	41881.1	44060.4	38671.5	45246.6	23416.7	43762.1	49788.1	39066.4	32618.4	42826.7	42645.4	46498.9	52345.3	42777.6	56092.1	37414.1	37603.9	37298.9	36033	32611.6	31145.8	38275	42094.6	45043.2	45724.5	52646.9	47034.4	38319.1	43482.5	42001.4	47141.2	38166.6	56673.3	54805.9	62909.5	57574.8	40972.8	48773.1	49430.6	52941.8	64629.5	56319.1	61689.3	66563	57566.4	55585.4	61502.9	55393.9
70	acceptor	23332.7	4990.22	32084.4	15443.2	31672.5	23833	21702	21567.6	28451.8	20821.8	22753.8	20720.3	7838.76	11720	12404.1	23815.1	28998.3	24154.8	22890.3	25351.7	19676.3	27185.3	15950.1	15352.7	18506.9	21222.9	21361	21407.6	9685.96	13291.3	19308.3	20417	12182.2	10971.4	4556.31	12148.1	16883.5	8359.64	12724.8	10577.5	4226.36	196.655	7379.38	4864.71	15571.5	17075	5633.78	11661.8
70	fret	0.358096	0.102124	0.453156	0.25441	0.574442	0.352411	0.303765	0.355244	0.466085	0.327013	0.347685	0.308394	0.129982	0.215042	0.180766	0.388677	0.43538	0.393495	0.388677	0.437348	0.386753	0.414823	0.274377	0.25441	0.288101	0.287183	0.312104	0.358096	0.18251	0.240002	0.290857	0.348629	0.177283	0.166868	0.06722	0.173805	0.291776	0.146198	0.204435	0.166868	0.0614616	0.00318731	0.107161	0.068044	0.21327	0.234632	0.0837649	0.173805
71	donor	25436.5	30150.1	25700.4	26786.5	22585.5	18021.6	24615.6	23570.1	17161.3	16783.2	28616.1	27582.1	31411.3	31953.1	34448.9	33268.9	43339.4	25941.5	20774.9	23275.7	26767.5	26357.7	17489.9	25342.6	26083.6	34624	39107.9	40522.7	25351.5	22098.3	15395.1	23591.7	32933.9	47662.3	43401.6	44395.1	52493.9	49352.3	54062.1	57127.6	48239.6	64357.3	61992.2	39878.1	47572.2	48379.1	46412.5	42566.7
71	acceptor	17634	23263.8	29958.1	26331.3	26867	22838.7	27725.5	21479.4	30029.4	22675.7	21389.2	16191.5	13918.4	21691.1	7666.48	11776.9	9308.52	16560.3	24800.2	30470.3	20994.9	23843.4	17598.6	24463.5	26087.8	16932.3	9682.91	15749	20704.2	23545.7	29417.8	26560	10686.4	1773.04	2500.97	-2535.66	-3906.98	1837.11	4697.39	568.347	4494.05	-1218.96	561.687	-661.286	-3448.31	-644.575	182.318	-6427.66
71	fret	0.409018	0.435919	0.537868	0.495827	0.542879	0.55892	0.529854	0.476837	0.636305	0.574977	0.427945	0.370224	0.306724	0.40404	0.18229	0.261207	0.176384	0.390109	0.543881	0.566946	0.439907	0.474839	0.501828	0.490828	0.499827	0.32853	0.198049	0.279994	0.449882	0.515836	0.656453	0.529854
72	donor	40733.3	36356.8	44104.8	33850.9	50092.4	48745.4	40336.2	33158.8	48748.7	45445.3	35144.4	40835.4	42903.7	41464.3	38635.8	38135	37874	34925.6	41227.7	30293.1	50374.4	46142.2	36373.1	38676.4	43331.6	38481.9	31272.1	38601.8	47575.1	36695.6	38475.4	37729.8	42910.2	33739.1	39825.6	48630.3	42122.4	40864.6	41594	43882.7	41731.8	34471.7	40679.8	31497.4	37875.6	42787	47156.9	38887.1
72	acceptor	18203.6	19268.5	12376.9	14511.7	20017.3	13873.3	21051.3	18268.1	14585	13012.1	21931.6	9191.35	13416.8	13187.9	10450.4	15687.5	14143.1	15964.5	15165	17761.9	14328.6	14188.4	15443.8	15563.1	15955	13856.5	19612.7	20558.9	16119.4	17270.2	18620.9	17156.1	16279.3	15597	14695.2	13268.8	14692.6	16408.4	12656	19851.1	15876.6	13808.9	11041	13367.9	17030.6	15269.7	19806.3	16927.7
72	fret	0.308627	0.346227	0.219017	0.300498	0.285263	0.221576	0.342517	0.355541	0.230138	0.222424	0.383832	0.183662	0.237888	0.241345	0.213064	0.291518	0.27195	0.314071	0.269302	0.369621	0.221576	0.2353	0.297798	0.287048	0.269302	0.264898	0.385737	0.347155	0.252638	0.320447	0.325934	0.312254	0.274603	0.31589	0.269302	0.214763	0.258755	0.286155	0.233577	0.311346	0.275489	0.286155	0.213064	0.297798	0.310439	0.26314	0.296001	0.303203
73	donor	81146.3	102918	98821.4	90924.9	95102.2	87602.1	97743.9	81238.8	86315.7	99402.9	84459.6	85871.8	90761.2	81687.4	74768.8	89410.7	87967.6	86479.4	77882.8	111453	89007.2	89557.8	82195.3	72245.8	85712.8	77491.1	92678.9	84979.4	97440.1	85257.1	83735.7	84934.3	85515.8	102436	70396.9	86802.2	99977.3	77120.9	84818	82235.7	96804	91698.7	97748.6	86415.4	80609.9	72535.4	82914.5	80906.6
73	acceptor	12863.3	16373	13406.9	11596.9	10889.2	12288.7	11595.4	11259.1	7824.12	6254.91	7761.01	11323.6	8309.13	4997.54	18409.3	12832.2	13769.3	7078.95	14993.8	17046.8	7530.7	16295.8	16727.6	13092.8	6467.75	15441.8	9361.09	17331.6	14604.4	14029.4	9715.16	16492.5	9513.12	15268.2	4949.14	12093.3	13325.7	16332.2	17943.3	13088	5099.76	11450.7	15000.5	16796.3	8500.56	14235	12166.1	11421
73	fret	0.136537	0.137218	0.119737	0.113132	0.102693	0.123063	0.105941	0.121731	0.0829331	0.0595013	0.0841901	0.116426	0.0835613	0.0576868	0.197676	0.125737	0.135178	0.0754446	0.16148	0.132467	0.0779325	0.153762	0.169284	0.153762	0.0698812	0.166436	0.0917879	0.169284	0.130441	0.141317	0.103988	0.162892	0.100114	0.129767	0.0655869	0.122397	0.117748	0.175016	0.174297	0.137218	0.0498803	0.111163	0.133144	0.162892	0.0956179	0.164308	0.127749	0.123725
74	donor	41987.9	57725.6	52401.6	56896.9	53034	35874.1	39096.5	28348.1	36365.3	44058.7	24268	40686.9	37257.3	59399.3	65522.1	50049.4	53260.1	35185.6	58295.6	40977.3	41942.6	42182.4	46723.9	43675.1	32391.1	44084.9	57122.2	49204.5	37969.3	56355	51833.5	49708.4	42752.3	40131.5	40581.1	44995.9	50021.4	57899.3	53296.3	49636.9	52515.6	42001.4	57929.2	53459.2	34737.8	42411.3	45268.2	52351.8
74	acceptor	13238.6	2868.31	17105.3	9906.68	13302.5	24725.8	20116.2	30962.1	23492.3	17604.9	37656.3	28089.2	18828.5	7110.55	4026.36	16873.2	14934.6	23319.9	16586.7	15124	18283.8	15326.5	13794.1	12160.9	20020.8	18604.9	17379.4	21017.2	23442.1	14102.7	16603.9	17734.5	26407.5	26028.4	26152.5	14745.1	17760.1	11848.1	9093.4	12672.8	11199.6	22263.1	13783.3	17175.6	19711.7	27218.6	24089.1	8751.79
74	fret	0.239885	0.0472952	0.246163	0.148068	0.200897	0.407643	0.339837	0.522306	0.39217	0.285132	0.607956	0.408614	0.336082	0.10663	0.0578748	0.252456	0.219413	0.398925	0.221186	0.269636	0.303513	0.266914	0.228291	0.217642	0.381598	0.297054	0.233636	0.298903	0.381598	0.20002	0.242576	0.26329	0.381598	0.393133	0.39217	0.247061	0.262385	0.16955	0.145505	0.203532	0.175607	0.346425	0.19214	0.243472	0.361562	0.391206	0.347368	0.142943
75	donor	8093.09	18995.8	18238.1	16907.3	18562.1	17512	15121.2	8759.35	4369.7	11869.6	5212.08	13124.1	8772.64	12534.2	7732.55	4677.08	2228.05	5310.1	7139.4	8488.52	12404.6	3445.92	10351	17919.1	12329.9	7390.28	2980.7	10103.5	6471.48	9244.5	6981.56	-259.191	10042	8187.79	8370.56	15279	6222.26	10061.9	-1884.12	-1646.53	8114.69	3156.82	6401.7	13841.8	8659.66	17380.8	7077.92	7066.29
75	acceptor	6470.17	13146.2	11768.8	10347.8	8664.14	8100	11155.7	15253	24533.8	17436.3	8925.05	18828.4	16676	19569.3	19026.5	19687.6	13937	19115.6	17066.2	12795.2	12151	19638.2	15097.5	19487.1	13431.5	20021.8	20139.7	17146	16497.9	13748.9	20050	14232.9	16943.6	20265.4	16852.5	11035.3	18869.3	18565.5	19395.9	16243	22952.3	20784.7	21388	15928.8	15641	12870	21440.5	20770.4
75	fret	0.444247	0.408978	0.392517	0.380013	0.318548	0.316684	0.424583	0.634809	0.848382	0.595396	0.631588	0.589068	0.655313	0.609167	0.711261	0.807568	0.862536	0.782246	0.704609	0.600682	0.495192	0.850735	0.593284	0.520596	0.521618	0.730211	0.870831	0.629443	0.717932	0.597509	0.74143	1.01881	0.628371	0.712372	0.668357	0.419695	0.751573	0.648803	1.10735	1.11257	0.739182	0.868458	0.769713	0.534948	0.643405	0.425562	0.751573	0.745933
76	donor	11429.1	14409.1	14832	5307.53	14727	13767	7834.4	8814.84	12979.6	10655.9	10423.2	11341.2	13764.1	20857.1	23395.3	9338.84	17462.8	23171.7	21140.4	20555.7	19134.7	24885.6	24515.4	22361.5	18955.9	15891.4	25688.9	27897.3	29106	22682.9	29691.3	23535	19999.9	17735.3	20914.5	28763.1	23998.3	16369.9	25311.4	23402.2	20833.3	25357.4	24953.7	15423.6	17087.5	20600.5	27524.9	24093.6
76	acceptor	11055.3	11425.4	9771.82	10995.4	13984	5523.6	12228.4	10511.9	8262.23	13781.3	7555.75	9289.62	13377.2	3514.99	4249.14	1286.58	-638.473	2523.58	-2753.94	-78.385	-3225.48	2220.04	-1854.16	-2952.95	2993.87	3118.59	2236.79	1455.48	-518.106	-1562.28	2541.11	-707.403	3930.17	3692.1	-2061.51	919.477	3871.78	-580.258	-2929.95	1063.76	1560.17	117.522	-1202.59	3386.12	679.656	-1566.46	-122.889	57.678
76	fret	0.491642	0.44175	0.397278	0.674718	0.486589	0.285888	0.609462	0.543697	0.388932	0.563479	0.420112	0.44996	0.492652
77	donor	12603.7	11692.5	15672.6	10702.4	9888.83	13151.7	14445	15609.6	17198.3	16214.6	19506.3	12150.3	11722.8	17492.8	13674.6	3426.63	11325.9	38136.8	42560.8	38563.9	40346.5	34256.5	33168.3	40040.7	40415.6	37379	37767.6	35809.8	39444.8	38528.1	39636.5	69434.4	46035.7	39148.2	33726.2	44000.1	40384.9	34900.8	40330.9	36847	39309.2	34041	42396.7	39876.6	34806.6	34087.6	33879.1	32558.1
77	acceptor	26239.8	34391.3	27818.9	21868.7	21968.4	28449.4	26318.8	28306.4	24796.5	22797.2	22507.7	27014.5	30295.1	21490	28886.1	34440.6	26706.9	843.179	-3523.38	490.99	337.277	-124.341	-1877.13	-60.67	2024.58	-66.714	-1279.8	3116.79	4363.32	2487.34	3769.85	-5079.25	3891.93	-3369.01	3717.43	3499.45	4041.48	-2510.34	-1515.66	-3809.21	6968.93	1895.68	-3964.33	-554.614	722.941	1808.29	-1386.65	-1125.29
77	fret	0.675092	0.746587	0.639991	0.671321	0.689183	0.683556	0.645717	0.644763	0.590788	0.583959	0.535636	0.690119	0.720828	0.551516	0.678858	0.909384
78	donor	25706.3	28214.4	24412.2	24636.7	12970.2	20717.4	26097.6	25858.6	28304.2	28057.2	27425.4	24938.1	22383.6	18562.1	23251.1	27146.4	35645.6	17263.1	21415	19142.6	21924.9	26902.6	31699.1	21487.1	19790.5	29707.4	21426.2	27972.2	29264.8	25703.1	28427.7	21102.3	33134.3	26011	24113.9	22300.2	24154	25926	21054.1	12934.9	12105.9	23841.3	12785.8	20675.7	23761.1	23571.8	26804.8	21844.7
78	acceptor	11234.8	4385.97	8600.93	7911.2	6511.09	11428.1	7990.61	4205.74	8943.35	6015.32	5008.39	9698.71	9875.32	12730.5	6275.49	10821.8	6009.54	4864.65	11403	3675.5	3598.53	8902.69	6900.37	2143.68	8064.67	5606.19	6855.94	9964.02	10274.4	5507.73	7028.27	12636.6	9686.75	9982.58	9200.96	8575.28	9555.84	10347.6	-24.643	4848.19	6292.54	11806.7	6118.43	5798.79	8605.59	3925.95	11849.9	11774.2
78	fret	0.303672	0.134933	0.260576	0.242956	0.334022	0.355067	0.234646	0.140285	0.240183	0.176219	0.154606	0.280173	0.306504	0.406377	0.2126	0.284858	0.143859	0.21993	0.347398	0.160893	0.141178	0.248509	0.17893	0.0907112	0.28955	0.159095	0.242032	0.262437	0.259646	0.176219	0.197994	0.374327	0.22636	0.277366	0.27643	0.277366	0.28392	0.284858	-0.000850213	0.272692	0.341658	0.331164	0.323555	0.219013	0.266162	0.142965	0.306504	0.350272
79	donor	36513	43797.5	42817.1	45651.4	40948.1	44082.1	34913.6	37391	42229.7	35472.3	45210.1	49056.4	41832.2	52158.8	50276.3	59840.9	37235.8	39282.5	49494.7	47660.4	41371.3	50651.3	44091.2	41738.8	38267.5	39693.6	43413.5	40881.9	34997.9	40196.6	40192.1	36954.2	41043	37762.9	32424.2	48964.6	46086.6	34978.4	38086.7	37793.1	38717.8	46655.9	40711.7	37037.1	47446.5	45077.6	40422.5	44377.3
79	acceptor	10441.2	14761.6	17361.2	14944	14847.1	15902.4	13700.1	9728.43	16986.5	16778.6	16753	11019.7	15556	13045	7342.01	3495.94	16732.1	15265.5	14671.8	13679.1	13843.4	12537.1	11421	18042.8	14483.7	15138.9	18586.5	16731.2	22920.7	19112	12833.7	15481.2	17551.2	13536.6	15414.8	10431	13070.2	17696.1	17704.1	17243.7	17445.8	14372.3	18995.1	18074.9	14600.5	16397.6	16842	12114.7
79	fret	0.222355	0.252344	0.288383	0.246449	0.265937	0.265083	0.281429	0.206842	0.28664	0.321111	0.270219	0.183602	0.271077	0.200387	0.127216	0.0552896	0.310393	0.279697	0.228949	0.223177	0.250657	0.198777	0.20604	0.301538	0.274517	0.276241	0.299775	0.290128	0.396168	0.322008	0.242257	0.29538	0.299775	0.264229	0.322008	0.1757	0.220712	0.335558	0.317527	0.313051	0.310393	0.235583	0.318422	0.328312	0.235583	0.266792	0.294503	0.214167
80	donor	24579.5	22260.9	25936.3	28849.1	35373	20977.6	28074.2	23908.7	26003.7	27345.3	27424.9	15969.8	32463.3	19265.4	20288.4	20328.2	38313.4	9638.84	27979.3	19495.1	20787.7	17029.5	21777	43413	32270.3	38913.7	35005.5	18420.1	22852	19611.5	34166.3	16178.1	22876.5	32065.1	18423.1	39382.3	36858.5	25124.7	25072.6	28003.8	14095.3	17440	24098.6	24221.1	26104.8	29835.4	35336.3	30166.2
80	acceptor	7615.12	7438.9	7481.88	6618.65	1727.66	7972.3	3923.54	8423.57	7366.5	6034.68	2513.65	4024.74	4205.31	4012.82	7477.7	-73.327	4638.39	12109.8	1610.16	4899.23	6290.93	4544.45	2016.66	793.974	1713.21	5468.25	9878.21	4518.98	4614.55	7441.12	3237	2139.8	5374.45	8299.78	4303.99	3508.89	3488.38	5345.25	4782.52	2746.83	5518.69	6433.48	8178.11	3674.36	3327.6	6238.24	3137.09	4147.3
80	fret	0.236191	0.250683	0.223536	0.18655	0.0468006	0.275155	0.122584	0.260818	0.2206	0.18108	0.0840436	0.201184	0.114751	0.172308	0.269537	-0.00372595	0.108218	0.55717	0.0546497	0.201184	0.232439	0.210446	0.0846054	0.0181405	0.0504442	0.123192	0.219869	0.196949	0.168309	0.275155	0.0862947	0.116548	0.189999	0.205439	0.189307	0.0818029	0.0862947	0.175664	0.1604	0.0891183	0.281643	0.269537	0.253006	0.131778	0.11296	0.172978	0.0818029	0.120766
81	donor	-4076.18	4149.67	-362.545	1376.69	-1857.8	2264.44	-4371.12	-186.172	-3716.57	3711.67	461.511	9062.64	1652.03	-1264.99	-969.073	4439.7	1429.6	1181.7	7815.29	-2508.42	-2395.74	-1129.77	-869.128	2178.21	7294.99	1214.03	2553.49	2222.3	7684.97	6552.26	2940.53	5696.85	9159.65	4359.36	-1937.17	4259.41	6558.14	1696.12	-1231.67	649.642	3261.92	7549.75	550.676	272.399	6822.7	-2088.06	291.015	1248.33
81	acceptor	28067.9	30663.7	36120.9	30406.6	30285.6	25219	29970.7	26223.3	27427.9	31803.8	31487	30251.9	26247.6	26932.5	31366.7	30304.1	29301	28370.9	30208	26413.2	31632.5	29493.5	32277.6	27815.8	28706.9	28555.2	26646.7	35344.7	34043.5	29888.1	30372	32170.6	37698.5	35551.6	33562.5	39431.5	36966	37155.5	39017.1	39254.5	29598.9	31120	29782.1	34784.4	33498.6	35696.2	32942.2	45584.6
81	fret	1.16897	0.880332	1.01089	0.957479	1.06504	0.918216	1.17106	1.00725	1.1565	0.894997	0.985645	0.769885	0.940234	1.04985	1.03104	0.872271	0.954008	0.959218	0.794913	1.10592	1.08239	1.04045	1.02734	0.926632	0.797898	0.959218	0.913198	0.940234	0.815996	0.820571	0.911531	0.850024	0.803895	0.890086	1.06123	0.903232	0.850024	0.955742	1.03299	0.983863	0.89993	0.8054	0.982084	0.992799	0.831325	1.06123	0.991006	0.973234
82	donor	6177.05	7011.32	3645.42	9238.07	3926.04	12503.9	10444	16156.4	17412.4	7505.82	14430.3	10795.9	12764.8	5360.98	9100.03	6246.83	6512.28	8610.09	7699.98	11531.6	12004.8	11790.9	8007.9	7046.21	7912.34	5288.17	3815.31	2569.97	9985.88	6099.69	8476.61	1712.95	5166.83	5893.4	7384.47	2662.5	3982.16	4689.02	7002.22	7743.96	9169.81	9621.83	4907.45	10553.2	1973.85	7115.99	1125.92	4123.23
82	acceptor	13234.9	21565.1	24214.2	25185.4	25018.6	21488.3	18732	18356.6	15681.7	14213.7	16183.4	17550	20791.6	16328.6	15486.7	23468.8	20968.4	21602.2	21677.2	20307.7	24855.9	22952.4	23613	23294.1	22598.8	20566.8	17619.8	17422	20065	24081.1	26456.6	25698.4	22932.3	22008.9	20778.8	17366.4	21630.6	20294.3	24209	20967.3	21768.1	28650.6	20729.3	20887.6	28854.3	18250.4	22352	25239.3
82	fret	0.681762	0.75444	0.869599	0.731839	0.864033	0.632376	0.64178	0.531547	0.474216	0.654358	0.528506	0.618835	0.619875	0.75336	0.630289	0.790231	0.763087	0.714713	0.738282	0.637597	0.674364	0.660654	0.74689	0.767418	0.740432	0.795686	0.821999	0.871828	0.668034	0.797883	0.75768	0.937063	0.816504	0.789152	0.738282	0.867372	0.844062	0.812114	0.776096	0.730766	0.704051	0.749046	0.808825	0.664864	0.935929	0.718987	0.951843	0.859585
83	donor	13585.6	9129.47	14666.8	12336.5	15763.7	12755.3	9423.69	12364.8	12279.3	9921.89	13577.8	15671.1	13753.5	8652.32	19089.9	18968.3	17264.3	20496.6	19248.7	14645.8	15984.5	10370.2	19279.4	7563.26	9540.42	3438.67	2417.6	6465.18	7080.1	4963.95	6370.11	7019.33	11641.5	10719.7	7267.83	8630.66	6521.73	7181.79	4969.37	4504.26	6263.01	8496.49	6220.29	2517.48	9513.95	10749.2	8474.82	3186.56
83	acceptor	30094.4	28752.4	30946.4	24510.1	27996.2	36270.1	31044	33089.4	28836.8	24482.4	30874	24366.9	26524.7	26642.7	18978.4	24830.5	28835.7	29962.1	23015.8	36282.1	29254	34312.3	28322.2	29532.7	30578.7	34973.3	28902.6	39221.5	33299.2	32609.2	27672.2	30799.7	31531.2	33809.5	37787.3	36597.7	40113.1	35180.9	30636.1	29934.1	33853.2	34331.8	32369.3	32414.2	20504.1	24217.5	33744	33631.8
83	fret	0.689287	0.758562	0.678875	0.665365	0.639509	0.739572	0.767025	0.728003	0.70181	0.711224	0.694501	0.608652	0.658117	0.754335	0.498154	0.566794	0.625085	0.593296	0.544475	0.712271	0.646737	0.768084	0.595341	0.795695	0.761734	0.910957	0.922958	0.858923	0.82453	0.867558	0.812762	0.8149	0.730105	0.759619	0.838474	0.809558	0.860001	0.830961	0.860001	0.869719	0.843847	0.80208	0.838474	0.928422	0.683037	0.692415	0.798882	0.913137
84	donor	37913.1	31543.6	27624	31333.1	31421.7	34467.1	30518.6	36172.4	25934.7	35930.5	30955.1	30299.8	27388.5	30986.5	35567.2	32937	31796.5	35842.6	29740.7	26240.3	30857.5	27188.9	27686.9	34477.4	39429.7	28136.8	25408.5	30424.3	25987.4	35140.4	30464.1	28358.3	27602.8	34815	28591.9	23512.5	30141.2	25381.5	26678	36546.6	33034.6	32050	33433.2	29268.4	29251	32263.8	31882.5	33460.1
84	acceptor	12658.2	12081	11234.7	9270.05	8853.16	7880.08	14950.7	10650.5	12815.6	10266.1	16619.8	12134.3	11500.3	17836.8	13044.9	8482.94	12537.8	17847.2	10472.5	8515.56	12191.7	9035.03	10912.2	10436.5	10374.3	14922	13214.5	12134.5	12784.4	6894.42	9552.49	14283.9	7656.77	8723.45	12490	12058.3	10968.1	12872	17251.6	12421.6	11718.7	18050.2	11123.6	14216.7	17471.7	12398.4	14995.7	7406.73
84	fret	0.250303	0.277198	0.289337	0.228246	0.220019	0.186449	0.328919	0.227331	0.330818	0.221845	0.34892	0.285597	0.295896	0.365216	0.267896	0.204544	0.282794	0.332718	0.260476	0.244775	0.282794	0.24938	0.282794	0.231911	0.208177	0.347009	0.342237	0.284662	0.329868	0.163996	0.238336	0.334619	0.217282	0.200009	0.304351	0.339378	0.266967	0.336522	0.39226	0.254001	0.261403	0.360413	0.24938	0.327022	0.373881	0.277198	0.319444	0.181043
[truncated: 562 more columns]

## Sheet: 239-274_intra_avitag
1	donor	23178.6	29279.9	17338.1	18971.3	21253.2	30836.6	88719.7	70511.2	83808	79783.3	83037.5	70559.9	66258.7	88958	101484	103375	91163.4	97384.8	94396.7	94356.7	89142.3	99369.3	94661.1	98816.2	101815	96856	99896.3	106803	105603	108549	98318.8	105632	102248	108290	113626	96099.4	94243.6	90824.2	102716	110186	97873.5	107203	100662	91667.8	98304.8	101768	89831.1	103424
1	acceptor	75678.3	70153.5	83685.5	68062.3	78027	64359.5	-6855.15	-6774.55	-7080.81	-11203.1	-6572.55	-6104.44	-5277.7	-5748.25	-2769.39	-4322.41	-9268.59	-1371.31	-4573.3	-4843.05	-9593.33	-3871.84	-3695.11	-5455.9	-5909.06	-1091.19	-5120.83	-7681.33	-4583.87	-3047.85	-6604.24	-5563.75	-2615.92	-664.166	-4986.43	-2820.89	-5009.15	-3576.55	-1062.76	-6341.52	1778.96	-2528.74	-3127.96	-4526.11	-1060.09	-7762.84	2944.36	-9329.14
1	fret	0.765989	0.705304	0.828577	0.781892	0.785867
2	donor	21646.3	17541.4	32841.1	50747.9	27345.2	27460	23145.6	18029.9	11960.8	34773.1	46492.3	22700.1	28123.6	13100	18595.9	24330.7	14850.4	20001.3	26221.1	16524.1	18015.6	43381.7	35636.1	17608.8	28582.7	32884.2	22845.8	20423.8	23812.8	45076.9	17592.3	19773.9	24591.9	26473.6	36002	34024.8	23504.3	17012.7	22449	18895.8	18231.5	13696.2	18331.2	13883.4	16791	24974.2	65364.7	41020.1
2	acceptor	63856.8	49439.2	52735.8	34464.3	52759.4	51937.7	53831.7	55031.8	63162.1	35921.5	49275.5	65152.9	53727.8	66938.5	61445.3	60046.4	60956.7	46453.5	62042.4	67720.4	57334.3	38221.3	35375.8	61811.1	52208.4	50845.7	56985.5	56099.7	56290.4	39264.4	68615.9	59645	58051.2	49500.1	51500.8	54062.8	86134.4	57177.7	63421.6	58528.7	70509.5	66538.1	59224.4	67282.7	64382.7	51876.9	37094.8	48314.4
2	fret	0.746881	0.738358	0.616179	0.403981	0.658915	0.654081	0.699305	0.753499	0.840418	0.508401	0.514406	0.741201	0.656015	0.836718	0.767643	0.711728	0.804192	0.699305	0.703131	0.804192	0.761048	0.468152	0.498375	0.777985	0.646334	0.607384	0.713644	0.732666	0.703131	0.465118	0.795786	0.750664	0.702175	0.651178	0.588755	0.614226	0.785489	0.770466	0.738358	0.756331	0.794851	0.829306	0.763876	0.829306	0.792981	0.675311	0.361699	0.541322
3	donor	53340.7	51923.5	50702.5	44701.3	47829.2	45747.5	46914.5	38251.4	52029.2	59057.2	37287.1	44515.8	41327.5	49833.2	53610.4	36053.2	52052.9	60487.4	67375.2	34396.5	32017.2	33863.7	35904.4	40423.6	45234.1	48333.9	47725.6	37841.5	34394.4	52055	39962	43165.4	29413.5	45562	68190.6	81392.4	109949	102034	100302	102453	93569.6	83456.9	75971.5	84865.5	89141	97845.1	94531.7	86856.5
3	acceptor	28026.9	37876.1	31231.8	32022.6	35244.6	34654	40352.4	42104.5	36089.8	29879.4	43858.9	34791.8	29319.6	36937.9	35682.1	42646.6	38977.1	23904.3	35288.3	37472.6	35747.1	45585.4	35891	34325.6	31856.1	31106.8	36766.8	39483.9	43612	36325.7	37591	40866.7	37224.7	29890.4	10917.2	-1304.69	-3471.04	-4463.01	1232.73	-2977.92	3871.6	-980.073	-2118.75	-863.889	-1656.79	-234.232	-3705.65	2101.54
3	fret	0.344226	0.421726	0.381334	0.417814	0.424669	0.430579	0.462646	0.524287	0.410031	0.336053	0.540504	0.438509	0.414889	0.425652	0.39942	0.541594	0.428605	0.283137	0.343315	0.52107	0.527512	0.573638	0.499857	0.459579	0.412943	0.391768	0.435529	0.510414	0.559164	0.411001	0.484202	0.486277	0.558058
4	donor	41459.5	39253.9	36880.7	46074.8	67414.8	96683.5	110329	95893.2	87536	97601	96533.5	102000	98387.4	97768.6	87036.9	97681.6	103915	98227.4	91149.4	87306.6	95159.7	91860.2	92013.9	91918.2	100403	102899	100437	97853.1	91133	93411.6	89153	98232.4	71199.6	93717.9	96542.3	98805.9	107890	96413.8	98037.1	88593.4	91514.8	91097.7	94906.4	54868.2	-672.127	51.3038	168.515	-2364.75
4	acceptor	52476.4	48314.6	47491.8	56665.4	21053.2	-4265.87	-607.736	-1195.84	-136.155	596.101	-2011.12	102.687	-241.879	-3171.7	-2316.38	-4945.61	-954.999	1562.18	-922.243	5598.8	-6049.03	-2189.89	-2663.26	-1651.93	-4207.84	-5464.41	-4191.92	-8082.93	-3496.04	-2481.18	-4262.2	-3826.99	-1466.06	-1708.3	-3677.07	-4641.46	-6283.8	-4689.01	-4421.78	510.676	-6512.27	-4561.22	-3299.24	-1853.01	-3505.13	5467.05	597.782	2619.39
4	fret	0.558927	0.551819	0.562993	0.551819
5	donor	25172.3	24956	26400.5	26815.6	30471.2	186846	204261	219519	195788	145275	150470	148165	146242	141111	141285	138459	143347	165982	142055	161480	162985	155899	146490	160392	153933	126911	145057	150328	187961	181052	154488	139182	157232	157245	149595	141727	191458	163787	124432	134319	129827	135033	136062	124530	123621	137946	128541	140369
5	acceptor	127127	128416	136165	124388	128562	30042.5	-863.012	-6183.79	214.632	-17.133	-605.353	-1721.16	-2043.15	-4246.13	-4093.04	-3028.11	2506.78	-1642.53	-796.378	1731.23	-1715.66	-1348.55	-2116.26	-3666.75	-5334.31	140.62	-1252.12	-480.606	-2112.73	-1045.27	2572.47	-2549.83	-3228.45	-1184.59	835.292	-3090.64	2619.34	100.222	-5335.82	237.977	-5072.98	-4138.25	-3590.46	-9029.78	-133.355	2046.37	-5.333	805.022
5	fret	0.83468	0.837572	0.837572	0.823183	0.808968
6	donor	35162.2	31618	39509.1	31216.3	45423.2	39587.7	35144.6	49366.4	46523.2	38514.8	24091.9	72561	86184.1	96106.4	90529.6	115321	82624.2	83705.2	117535	101064	78511	78962.8	93201.5	97796.3	81236.5	80830.1	88508.6	89618.6	88358.9	106668	107097	74877.4	100243	81435.6	65143.3	91683.7	106338	116814	89943.7	98852.2	99534.9	89178.4	106111	95494.2	97087.1	84142	102776	83890.1
6	acceptor	50726.5	43175.8	37204	36785.8	34253.4	44821.4	51658.6	36105.4	38375.9	36204.1	44455.6	5173.05	-2704.32	1791.88	-2256.95	-2685.91	2691.22	-2480.02	-3433.77	-3475.73	-4535.59	-6257.8	-1568.41	-3747.18	-6442.14	3657.16	-258.463	-1397.62	3480.02	-3447.46	-6673.38	-4774.71	-4569.71	-2810.89	-8320.31	-3133.43	-3143.66	-1711.67	-8188.09	-6848.7	-2005.78	-2837.07	7140.35	-4405.04	-3517.12	-650.473	-3317.29	-3247.54
6	fret	0.590503	0.576811	0.485094	0.541286	0.429808	0.531336	0.595376	0.42256	0.452473	0.48408
7	donor	70252.8	70127.3	78995.1	57618	69281.2	55810.4	57304.2	57265.8	54980.5	61915.3	62172.3	58281.9	63467.8	59528.8	65297.6	57943.9	60644.1	57585.6	56668.6	55023	62840.3	52587.9	63961.7	66947.3	64680.3	73021.8	54399.6	48357.4	54691	56055.3	56856.9	58532.9	66761.1	59943.7	72530	57085.6	69639.5	58136.2	56583.6	63150	92085.4	114973	106206	103075	94670.2	95917.1	101631	88660.5
7	acceptor	41207.5	45920	36145	52296	47358.6	37913.8	38728.5	43791	48392.1	45516.1	44699	46028.8	47357.1	43557.8	43715.3	36230.6	46959	42867.5	46254.9	54319.7	49597.7	50466.6	49199	45112.2	44165.7	42864.6	47736.6	49009.9	52709.7	69975	45625.3	64439.9	60842.1	55873.2	47190.1	45555.8	25057.3	44978.7	36813.5	33918.1	1555.8	-673.452	1181.51	1737.9	1034.1	3376.42	1367.13	2313.58
7	fret	0.369279	0.396097	0.313931	0.475763	0.405764	0.404795	0.402859	0.43308	0.467753	0.423281	0.4184	0.440953	0.427195	0.422304	0.400925	0.384559	0.436028	0.427195	0.449847	0.496938	0.440953	0.489855	0.435045	0.402859	0.405764	0.37023	0.467753	0.503016	0.490866	0.555541	0.444901	0.52449	0.476766	0.482797	0.39417	0.443913	0.26461	0.436028	0.39417
8	donor	46227.7	63530.3	52809.9	51152.3	63529.3	45677.8	92716.9	109912	101211	111024	106396	115795	112013	113028	110466	108044	291.444	2969.85	1688.54	2091.85	1269.8	4036.97	1653.81	-852.862	4986.38	1192.61	-4930.3	-789.183	373.456	-2607.92	1241.82	1630.65	-4208.6	1809.15	-680.156	1928.79	-3068.15	-455.347	-3243.75	-985.046	613.703	-3774.42	4505.89	-1524.4	-4824.17	-7176.46	-1050.66	4226.08
8	acceptor	57029.9	42817	51063.5	53380.9	52307.9	48544.6	7827.9	-5538.49	-1985.5	-1798.47	-1171.2	-6503.9	-10024.2	-6048.51	-239.494	3866.08	5556.19	8690.46	9794.23	4229.89	2420.99	-310.055	5619.34	3365.78	9162.99	8611.62	4394.25	4603.09	3133.01	-1438.87	-4410.26	-1771.59	-7934.83	-1415.56	1549.6	-5215.98	-96.973	-2241.95	4785.09	-435.872	2707.94	7960.77	2037.94	2414.35	3411.71	-571.115	-635.89	3710.69
8	fret	0.551982	0.402766	0.491903	0.510332	0.451705
9	donor	9966.04	7799.87	13603.4	12665.7	13435.2	14879.1	18632.4	15502.8	8823.73	12648.3	8924.79	10285	7162.86	9514.58	9606.53	10155.7	26253.3	13385.5	12416.3	9305.01	10139.2	12666.5	17574.6	14274.4	10301.5	9307.49	8378.9	17765.9	23899.9	15347.9	8794.74	6779.33	9697.65	12056.8	12148	10622.1	18497.4	12485.1	10888	14397.8	9463.23	14820.3	11333.7	13126.2	16511.8	13874.3	9727.47	9477.31
9	acceptor	33601.7	39646	29189.1	31277.2	32322.7	39567.8	30424.7	29926.7	33612.9	37098.5	37310	25733.8	33828.8	39354	37811	31779.6	28462	43294.8	31676.8	31522.2	38130.2	36709.4	31996	33293.3	41622.3	38236.2	37133.1	31363.8	35370.1	31723.3	34046.8	32702.5	34706.4	41295.2	33215	40627	40845.3	34434.8	34248.5	34163.1	31344.9	42664.8	40129.2	37578.1	36446	47866.8	36659.5	39973.1
9	fret	0.770955	0.835674	0.682114	0.711955	0.706802	0.726402	0.619757	0.658543	0.79177	0.746054	0.807414	0.714017	0.825197	0.805325	0.796983	0.757457	0.52068	0.763683	0.718143	0.771994	0.789685	0.743983	0.645251	0.699594	0.801156	0.804281	0.81578	0.638104	0.596382	0.673905	0.794897	0.828338	0.781355	0.774073	0.732602	0.792812	0.688282	0.733636	0.758494	0.703712	0.767837	0.741913	0.779273	0.740878	0.688282	0.775113	0.790727	0.808458
10	donor	23429.8	25574.3	36307.5	27109.2	18704	18424.9	18224.8	19113.4	14216.8	20472	17198.4	17119.5	18670.9	26049.8	22453.1	20727.2	12604.8	24639.7	25363.1	19869.8	26661.2	24428.6	11053.3	17394.9	20692.3	17786	16008.7	15709.4	20987.9	22271.3	18283.5	13875.3	18659.9	27123.8	22252.9	24463.5	23798.9	27606.7	15972	15757.2	31085.9	21975.7	20543.6	33230.4	21698.5	20196.6	21259.7	15527.7
10	acceptor	18316.6	24279.4	27315.8	22695.9	39758.9	44212.1	31557.1	35851.1	45489.3	32111.6	34791	23951.1	28780	27241.9	28641.1	25960.7	47025.3	24109.7	28604.8	22783.3	31998.7	38510	37836	32978.1	33541	30310.6	36981.3	35295.6	27022.1	29772.6	27929.4	25391.7	34733.4	30687	35049.2	25414.4	31360.3	31941.5	17851.2	23539.4	35448	43489.8	30919.8	20392.7	36530.9	31239.7	29627.1	37142.4
10	fret	0.438263	0.487184	0.429803	0.45611	0.679684	0.706168	0.633999	0.651847	0.762313	0.611148	0.669529	0.583153	0.606353	0.511664	0.560628	0.555693	0.788401	0.494358	0.529807	0.533814	0.545781	0.612105	0.773668	0.654651	0.618792	0.630214	0.697993	0.691607	0.562598	0.572416	0.604431	0.646225	0.650911	0.53081	0.612105	0.509637	0.568495	0.536814	0.527801	0.598654	0.532813	0.663965	0.600582	0.380393	0.627353	0.607313	0.582179	0.705262
11	donor	52396.9	69814.1	47261	49606.5	66633.3	64950.6	51195.4	51410.3	56646	58455.8	51119.7	50674.8	52188.1	46949.3	45448.2	47554.6	54963.3	45887	48498.8	28587.8	36117.6	35391.3	44125.6	37806.4	46186.6	47545.5	55314.4	34377.4	40269.9	35397.3	43123.8	29871	47385.1	38348.1	44815.6	34668	34988.8	37149.6	41668.1	42981.6	30591.3	57759.7	40854	36314.3	42821.2	64269.6	76094	87437.1
11	acceptor	25347	44040.6	41034.6	38169.8	39257.3	41902.2	34975	37615.7	34218.8	33250.5	36454.1	42805.2	43447.1	54196.6	46161.3	45318.6	54654.4	55183.3	44169.2	55587.3	52884.8	54045.3	48998.9	46431.4	50529.7	50246.9	54827.5	58239.2	54355.4	53999.1	63921.3	59069.6	48132.4	51635.3	39786.6	49681.7	49377.7	47767.2	40820.7	53352.8	60050.1	44494.3	39492.7	54667.5	53079.3	34069.3	25737.1	23667.2
11	fret	0.326406	0.386353	0.464564	0.434794	0.371154	0.39209	0.405556	0.42206	0.376837	0.362668	0.416216	0.457569	0.454581	0.536184	0.504086	0.487743	0.498966	0.545618	0.476625	0.660848	0.594677	0.604442	0.525762	0.550882	0.522649	0.513342	0.497929	0.628529	0.574242	0.604442	0.596842	0.664224	0.504086	0.574242	0.470583	0.589275	0.584966	0.562522	0.494867	0.554049	0.661973	0.434794	0.49181	0.601181	0.552993	0.34676	0.252786	0.21297
12	donor	16950.1	20991.9	14133.5	18777.5	16056.5	21851.1	20452.5	18082.7	16974	18665.4	14163.4	23351.3	19674	16724.5	18746.1	19502.2	15496.2	22014	14498.1	20210.5	18369.6	22601.2	18414.4	21217.6	18710.3	21976.6	8276.19	14937.4	12636.3	17632.9	11254.2	12784.2	13045.7	16821.6	9649.37	16866.4	18009.5	12344.9	10907.5	14118.6	11521.6	17673.3	17485	15275.1	12250.8	19594.8	13510.4	12561.6
12	acceptor	18672	2595.08	7982.06	6763.97	7223.57	-1816.54	8791.73	6190.33	7062.56	5321.76	8858.01	6313.76	19100.2	6560.82	10015.2	13458.9	14628.1	8574.42	20139.1	6600.39	5482.5	7309.47	6488.86	3725.64	10068.1	12065.6	16688.7	11154.7	8879.35	13435.6	14873.5	6190.82	6854.6	17283	9295.25	11607.9	14814.3	18333.7	3877.75	3431.66	16666.3	6635.86	18076.9	3200.86	4137.38	10196.9	9702.62	12848.6
12	fret	0.524254	0.109631	0.361017	0.26488	0.310195	-0.0909915	0.300525	0.254881	0.293226	0.221877	0.385148	0.212856	0.492188	0.282204	0.348199	0.408843	0.485885	0.279742	0.581134	0.246072	0.229563	0.244809	0.261139	0.14939	0.349369	0.35404	0.668555	0.427715	0.412194	0.432116	0.569377	0.325764	0.344681	0.506792	0.491139	0.407725	0.451734	0.597598	0.262387	0.195947	0.590846	0.273569	0.507827	0.173524	0.25237	0.342331	0.417758	0.505735
13	donor	37139.9	23939.6	16264.5	22537.8	33724.8	18769.6	40737.9	20299.6	17821.8	42057.7	30231.9	27825.5	17401.5	17298.5	19675.4	23063.2	10497.6	22104.9	15795.8	4012	9432.09	16989.5	36784.7	25198.5	22226.8	16565	32751.7	22527.3	10829.7	23590.7	20175.6	42965.6	40065.4	38430.3	25377.1	15921.9	24635.2	21707.7	14860.6	24631	55577.5	81244.6	70923.5	54606.5	55054.2	68691.6	68048.5	70665
13	acceptor	27193.8	30928.8	53943.9	39814.9	55181.6	66746.1	41843.9	49104.5	41487.5	34939.8	25500.4	33040.2	58887	45243.3	46732.5	37884.4	41372.6	27033.9	32234.1	50057.5	50358.2	54281.5	32877.8	44433.4	41375.4	23139.9	18337.1	36332.8	64450	69095.2	46848	30411	36581.1	39021.6	29932.5	52270.3	55912.1	59094.3	42330.3	40504	-8106.95	13502.4	-6103.37	-1552.72	6399.22	814.227	-2784.63	1902.8
13	fret	0.422697	0.563722	0.767977	0.638557	0.620608	0.780898	0.506765	0.707295	0.699332	0.45374	0.457744	0.542746	0.771953	0.72322	0.703313	0.621605	0.79779	0.549739	0.671445	0.925764	0.842473	0.762012	0.471756	0.638557	0.650519	0.582692	0.35854	0.617616	0.856366	0.745106	0.699332	0.414682	0.477759	0.503765	0.540748	0.766983	0.694353	0.73118
14	donor	33000.6	22803.7	13638.3	22559.5	18818.5	16144.4	20103.6	21592.9	18555.7	22464.8	19058.1	15994.9	14853.8	15530.7	16671.8	19465.7	14343.1	15022.8	25702.5	9551.04	19120.3	17806.4	23383.1	21249.4	26332	21438.8	12427.6	17235.4	28989.4	16001.4	10940.1	17127.7	23197.4	20075.7	18223.3	25743.4	12391.4	24151.9	14701.5	22023.7	21468.5	22590.1	18530.7	34203.9	33713.7	19538.1	16682.9	17071.1
14	acceptor	38827.3	35092.6	39901.5	39544.8	42159	38137	41323.1	41157.4	31018.6	36861.6	36393.2	38258.9	35699.2	45170.2	47745.5	35565.2	37718.3	45585.1	35833.7	35099.5	37138.1	50973.4	32749.2	37092.8	37737.9	44376.6	42269.8	41136.4	39339.6	46473	47535.4	35254	32114.6	37262.7	38342.7	31289.3	47129.1	38810.8	42646	33201.3	31207.9	42006.9	30255.5	37232.4	28641.2	33473.2	40254.3	37138.6
14	fret	0.540715	0.606295	0.745048	0.636958	0.691142	0.70293	0.672455	0.655708	0.626088	0.621143	0.656694	0.704893	0.705874	0.74407	0.741137	0.645844	0.724498	0.751889	0.582498	0.786027	0.659651	0.741137	0.58349	0.63597	0.589442	0.674424	0.772385	0.704893	0.575546	0.74407	0.813258	0.67344	0.580512	0.64979	0.677376	0.548686	0.791868	0.616196	0.74407	0.601341	0.592418	0.650777	0.620154	0.520762	0.459672	0.63103	0.706855	0.685244
15	donor	12948.8	15917.9	26627	17973	14139.7	14822.9	9174.7	21775.2	31195.4	9976.51	17466.5	10279.3	19129.4	39376.2	53623.4	58153	58001	84905.8	84030.7	66120.4	60597.2	60953.9	72238.5	57822.1	62316.1	56390.9	71532.6	52379.7	49517.3	58227.3	62744	64580.4	67869.5	46620.5	67192.7	61441	62316.1	55893	69476.4	68923.5	58337.2	49795.4	54814.2	46297.2	69919.3	68600.2	61267.5	54552.4
15	acceptor	50761.9	46193.5	33321	44706.7	50818.4	46203.8	57895.5	40324.3	39174.1	46818.8	41215.8	44354.7	41742.5	22992.5	-7121.17	-2870.12	-8368.57	7592.62	6003.84	-3057.66	-1439.48	-4318.16	-682.055	230.351	4224.82	-5892.48	2828.24	3874.34	4289.34	-1154.76	-2769.8	4504.89	5648.07	23.355	2329.31	-2568.19	-687.183	-1894.06	-5864.5	-1859.04	-604.876	8088.22	-2815.34	-2629.95	3476.72	1771.45	6250.04	-2122
15	fret	0.796217	0.744078	0.556148	0.712938	0.782029	0.757044	0.863626	0.649373	0.557171	0.824801	0.702263	0.811586
16	donor	37925.2	35702.8	39196.5	40685.5	31823.4	33628.6	34142.9	41334.9	45676.1	62138.3	54046.3	58096.3	49344.3	57738.1	53827.2	60968.1	56556	58279.9	61656.9	61683.1	60541.7	56859.1	56148	69830.2	63839.9	64368.6	79177.8	79476.9	74750	64795	75807.4	69974.6	63462.1	56079.8	55494.7	44732.8	47402.6	53416.6	59378	51802.9	62437.5	58775.8	56881.4	55421.2	52205.7	66257.8	63923.9	72624.7
16	acceptor	32813.1	23319.2	26339.4	26836.9	25016	27226	26974.1	25134.6	20162.5	1673.39	4828.43	664.914	4859.27	4581.8	134.395	8654.24	9622.3	4844.05	-259.735	-1071.68	1535.39	2389.16	-2216.41	1728.91	-1534.12	3838.51	-2371.05	1750.7	35.064	1095.77	5960.33	-190.385	2852.31	-5374.55	-2956.55	1974.49	-497.397	746.764	10324.7	-2743.28	-7460.09	-1096.56	-1208.48	-264.848	1800.86	-1028.89	2718.09	1485.7
16	fret	0.464005	0.394793	0.401673	0.397741	0.440171	0.447111	0.441162	0.378124
17	donor	38394.5	41881.9	43000.7	77195.7	85182.2	72279.5	75671.2	70975.8	66023.7	60787.7	74400.2	79527.4	74985	75729.3	66432.6	70356.7	77209.6	86426.1	87924.5	93121.2	82929.8	81249	77456.6	50193.9	46560.9	50728.7	51289.8	26750.6	34207.9	41574.4	54335.5	52887.1	39275.4	39613.1	44876.1	45556.6	58578.6	42125.6	60401.6	53940.5	46948.6	49810.3	50314.9	52452.8	45680.9	50340.3	44378.8	47200.5
17	acceptor	70621.4	67649.4	69298.4	47318.2	41111.4	38768.7	42574.9	48547.4	50673.1	45821.4	50558.7	46013	50064.9	36874.1	45507.8	44350.5	40857.9	62850.2	54111.6	41331.9	46828.9	46498.5	63181.5	71913.9	72117.2	65377.3	65700.7	77495	78828.9	67737.3	70680.9	70326.4	79507.6	69800.3	64104.2	72638.4	60661.8	77055.3	74793.7	69085.5	68758.6	68504.9	69627.4	75858.7	72678.4	66003.8	79529.5	71705.1
17	fret	0.647261	0.617733	0.616648	0.379733	0.32529	0.349488	0.359826	0.406626	0.433929	0.430004	0.404692	0.366437	0.400829	0.32714	0.406626	0.386418	0.345744	0.421201	0.380686	0.307817	0.360769	0.363601	0.449719	0.588657	0.607991	0.563184	0.561076	0.743299	0.69751	0.619904	0.565293	0.570578	0.669432	0.638464	0.588657	0.61448	0.509157	0.646159	0.55372	0.561076	0.594008	0.579064	0.580127	0.590795	0.61448	0.567405	0.641758	0.6026
18	donor	18434.2	17278.7	23094.3	22680.3	16658.3	17718.1	22020.7	25682.1	28063.5	27490.4	22976.7	22509.7	24230.3	16575.3	14587.1	14756.6	25026	29862.5	31389.4	30694	29566.2	28704.7	30956.9	24058.4	24550.8	14250.4	22267.5	20997.8	29378.2	23901.6	16289.3	18706.4	14889.3	18254.3	17356	15875.3	11622.2	16119.7	17573.9	18084.8	19717.7	12677.4	17187.6	14468.3	19186.1	15597.3	22809.5	19987.6
18	acceptor	40352.2	47360.4	39244.8	35177.7	44426.8	42051.5	30148.8	28884.9	34703.5	32864.9	34075.2	32090.2	24811.4	35480.3	43151.5	33793.5	37431.6	26975.8	31019.5	30611.2	22746.1	31320.1	24361.9	32831.1	32331.4	40786	35569.7	44074.9	27708.4	34835	44693.8	40209.4	41915.4	32666.6	38017.2	35639.5	42069.3	37393	31778.9	39416.2	43460.5	41538.9	35802.4	38574.4	38740.2	44155.9	37352.3	28253.9
18	fret	0.686877	0.733079	0.629513	0.60796	0.727327	0.703288	0.577436	0.529817	0.552689	0.544745	0.597149	0.587307	0.505844	0.68204	0.747432	0.695572	0.599116	0.474716	0.496826	0.498832	0.435292	0.521839	0.440363	0.577436	0.56854	0.740739	0.614827	0.677199	0.485783	0.593218	0.733079	0.68204	0.737868	0.641232	0.686877	0.691709	0.783615	0.698466	0.644158	0.68591	0.687844	0.766508	0.675261	0.727327	0.668473	0.738825	0.620707	0.58533
19	donor	56857.2	45171.9	54423.4	46119.8	50111.6	48285.7	50247.6	63796.8	54823.3	44977.9	26936.9	44055.9	34342.5	41032.1	31718.6	45333.9	38442.2	48591.7	35548.4	35376.4	30628.7	40848.1	41112.1	38502.2	25988.9	33734.5	34760.5	28200.8	34916.4	30740.7	33102.5	33874.5	27334.9	30722.7	23447.1	25305	36654.3	33500.5	23539.1	29046.8	29096.8	37522.3	31022.7	38902.2	26536.9	28578.8	34292.5	39904.2
19	acceptor	43207.7	42875.3	39287	47135.6	34586.5	46064.3	45159.3	43611.8	42740.9	47413.4	44649.2	43965.6	43481.4	49243	52704.1	34255.9	42861.8	38211.3	36581.8	41860.9	41697.8	45735.2	34822.9	44463.3	44663.8	40715.5	43775.6	41275.2	51420.6	47552.9	44019.2	37681.4	39020.7	42674.4	44292.7	46970.2	44649	44727	43230.9	47400	44734.3	33829.6	47364	40970.6	44899.9	43323.4	50327.3	42146.7
19	fret	0.432025	0.487046	0.419309	0.505523	0.408634	0.488066	0.47286	0.405736	0.437931	0.512763	0.623419	0.499345	0.559077	0.545247	0.624555	0.430062	0.527348	0.439905	0.507588	0.542073	0.57627	0.528395	0.45879	0.535745	0.632376	0.547366	0.556941	0.593656	0.595843	0.606824	0.570877	0.526301	0.588202	0.581682	0.653801	0.650399	0.549489	0.571954	0.647004	0.620082	0.605723	0.47387	0.604622	0.512763	0.62902	0.602422	0.594749	0.5138
20	donor	41169.9	36446	32146.2	16877.7	34913.3	35940	37926	19829.1	38095.7	26313.8	31608	26863.7	32810.2	30423.4	35875.6	42638.2	27445.8	15608.3	29332.4	29759.4	25854.6	28858.5	29349.9	34863.6	30049	35223.3	40930	30870.9	33997.8	28782.5	25290	28920	42565.1	36431.4	36042.3	38239	22938.3	46885.3	30914.8	32257.4	31333.1	26068.1	28709.4	22142.7	33409.8	41576.4	19600.9	28463.7
20	acceptor	33246	31513.6	40398.4	47801.9	36557.8	28796.4	32062.6	45367.8	50399.9	34959.8	43650.6	27561.9	25376.1	31271.4	27297.7	36130.6	36029.6	42830.3	35451.7	37773.7	44649.8	29922.6	32480.7	32208.3	33581.3	38079.3	35042.8	34602.2	35455.1	36759.6	38383.6	30601.4	35312.5	17104.5	25790.3	34718.8	24111.8	29451.5	44647	30556.7	31649.5	37269.5	44894	44974.4	35335.3	35266.7	49033.9	32176.2
20	fret	0.446946	0.463812	0.556673	0.738859	0.511925	0.444967	0.457849	0.695825	0.570014	0.571043	0.580314	0.506879	0.43608	0.506879	0.432138	0.458842	0.567958	0.733449	0.547469	0.559747	0.633361	0.508896	0.525073	0.479769	0.528116	0.519002	0.460829	0.528116	0.510915	0.560772	0.603091	0.513945	0.45388	0.319921	0.417399	0.475773	0.512935	0.386185	0.590647	0.486776	0.502848	0.588578	0.610372	0.670272	0.513945	0.458842	0.714046	0.530147
21	donor	25500.3	14651.6	17161.9	26920.6	11069.9	22253.6	37137.7	32865	23956.6	19956.1	22323.4	26332	29946.3	21340.4	28298	42699.3	34426.1	35594	22846.9	26158.7	28150.2	25859.7	21528.9	24681.3	30026.6	29935.8	34720.4	28130.4	35253.2	32141.4	21157.8	30494.2	30800.2	19084.8	34484.2	25618.9	39734.1	33255.8	25329.3	35259	28726	34205.1	28286.3	26601.9	32332.2	39964.4	23999.7	43420.5
21	acceptor	50806.1	43091.5	42674.7	52849.5	59450.3	54830.1	37735.1	42179.3	42484.3	53077	45168.8	29433.4	35951	38182.8	40458.5	28596.2	34114	41918.8	33933.7	27793.6	34426.4	40165	45644.3	49540.7	40810.7	31327.7	42705.5	37388.1	42786.9	43495.8	48441.9	34711.6	42679.1	45451.2	36680.4	46619.5	38599.6	30739.1	47899	33564.4	40185.4	39386.6	36387.3	49060.2	41756.1	23315.6	52670.4	32792.7
21	fret	0.665714	0.745845	0.713613	0.662822	0.842866	0.711699	0.503516	0.562261	0.639613	0.726911	0.669566	0.527514	0.545421	0.641552	0.588864	0.400957	0.497494	0.540455	0.597701	0.515532	0.550381	0.608459	0.679181	0.66764	0.576077	0.511531	0.551372	0.570162	0.548398	0.575092	0.696429	0.532496	0.581	0.704072	0.515532	0.645428	0.492469	0.480384	0.654134	0.487438	0.582967	0.535482	0.562261	0.648332	0.563249	0.368962	0.686856	0.430666
22	donor	52702.8	61249.6	47256	54100.1	59766.3	49030.6	58074.2	53598	44907.3	59174.8	42929	47872.1	54154.5	36695.8	48219.7	51388.1	53124.1	49241.3	46294	55620.2	51593.4	62903.1	55569.3	53589.3	47835.2	58893.9	59225.7	45772.7	55137.5	50793	59736.5	60596.6	62627.6	54505.6	57117.5	60247.3	61440.9	59273.1	56977.1	57509	57882.8	118962	166748	150284	153932	148755	134799	157687
22	acceptor	89893.8	91964.6	82411.1	77588.9	95116.7	87504.4	90435.2	81589.8	99796.2	81806.9	95647.9	100134	79587.2	82465.5	91995.9	92076.6	87550.6	80201.9	81711.6	92805.2	86326	86674.9	91484.8	95000.4	101458	96196.8	93080.2	84118.1	94399.7	88352.1	84447.4	89056.9	87693.9	85286.1	89215.7	88880.9	84639.2	88010	89575.1	93835.8	113345	28788.4	1584.85	-23.692	289.167	722.499	1768.76	-995.45
22	fret	0.630635	0.59991	0.635645	0.589089	0.614535	0.64068	0.608414	0.603545	0.689863	0.580757	0.689863	0.676678	0.595085	0.692521	0.655945	0.641943	0.621932	0.61946	0.638159	0.625652	0.625652	0.579573	0.621932	0.639419	0.679301	0.620695	0.610857	0.647011	0.631885	0.63439	0.585509	0.595085	0.58313	0.609635	0.609635	0.596289	0.579573	0.597495	0.610857	0.61946	0.662377
23	donor	36109.7	42045	38639.9	33639.9	34558	54937.2	49187.3	38661.4	42739	34786.5	31687.3	27467.5	30777.9	34752	35415.8	37579.6	36157.1	48407.1	34450.3	38372.7	22734.8	39295.1	18769.3	34437.3	25377	44200.2	34933	33454.6	37131.3	30424.4	35170.1	25652.9	32821	24950.3	20760.7	25092.6	32782.2	23277.9	28019.3	37234.7	30700.3	39377	38148.5	49226	48424.3	30670.1	43351.1	28446
23	acceptor	39806.5	52493.2	40982.4	57611.7	35505.2	35332.6	25821.1	38319.9	33085.3	27122.3	38841.3	34286.4	32835.5	44637.3	36539.9	14706	35303.8	32795.2	52949.1	40381.3	50373.4	38908.9	53924.5	45108.7	48107.6	43237.1	41622.8	48912.9	43195.2	62515.2	55177.5	60835	42421.9	59843.4	35630.9	46380.6	52346.9	47604.1	36661.7	36005.1	41469.5	34656.9	39995.2	34811.3	28481.7	53351.7	46892.6	38387.4
23	fret	0.524322	0.555453	0.514299	0.631154	0.506287	0.391773	0.344339	0.49828	0.436436	0.438426	0.550428	0.555453	0.516303	0.562498	0.508289	0.281423	0.49428	0.403665	0.605862	0.512295	0.689045	0.49728	0.74213	0.567531	0.654476	0.49428	0.543393	0.593743	0.537367	0.672763	0.610916	0.703311	0.563505	0.705351	0.632167	0.649402	0.61496	0.671746	0.566524	0.49128	0.574582	0.468311	0.512295	0.414578	0.370006	0.635207	0.519309	0.574582
24	donor	30708.5	45788.9	46884.2	53500.2	55139.2	46149.7	43080.2	39123.1	36922.8	27448.2	45990.9	47846.4	43660	55421.5	49725.1	45537.1	52114.7	42750.7	40163.9	44685.5	46225.1	47998.8	62801.7	43255.8	50223.9	46480.1	59943.1	48459.8	40140.6	61665.5	57032.4	57434.1	44933.3	43325.6	51943.9	44234.9	49976.1	41947.2	50332.9	70214	41832.5	45464.1	58606.4	58413.2	44104.2	47489.6	50753.9	43920.6
24	acceptor	62807.3	54695.5	54269.8	44842.5	34205.4	53535.9	56396.9	57239.6	59390.2	64292	43811.9	52383.1	47993.2	45149.3	57794.1	46991	45659.8	58036.5	55742.8	47768	57055.3	58351.8	38805.1	57062.1	63609.4	83977.5	51466.3	45522	57914	46215.7	54984.8	37955	46481.5	57738.6	53615.6	57507.7	53543.2	60520.3	47444.5	48315.9	50654.9	55024.5	29458.7	38612.8	57589.8	52229.2	50552.6	53017.5
24	fret	0.671671	0.544165	0.536101	0.456012	0.382885	0.537109	0.567427	0.593829	0.61626	0.700614	0.487918	0.523013	0.524018	0.449056	0.537109	0.507947	0.466961	0.575538	0.581629	0.516982	0.552244	0.548203	0.381903	0.568441	0.558316	0.643904	0.461982	0.48392	0.590777	0.428236	0.490918	0.397635	0.50895	0.571482	0.507947	0.565401	0.516982	0.590777	0.48492	0.407489	0.547193	0.547193	0.334958	0.397635	0.566414	0.524018	0.498925	0.547193
25	donor	53781.2	47468	45996.3	62297.9	48620.6	49894	57580.6	55722.2	64705.7	120320	114382	98144.3	107456	109510	104764	98998.7	98346.8	102005	96594.4	77676.4	113707	112444	106063	102258	111327	107809	116550	105992	94268.4	92522.9	112323	124787	111525	96917.8	99388.1	105855	107450	108663	99423.8	98502.4	108134	110569	90262.9	97435	103365	93192.2	93208.8	86350.5
25	acceptor	51992.1	33852.1	53370.3	46103	37693.1	46764.6	55052.1	65646.4	50119.8	1829.24	-681.446	-4246.23	-5448.49	2196.41	5917.36	-1920.35	-7360.5	-1994.92	2306.34	-5934.18	1541.26	988.181	-4780.15	-7698.33	-225.442	-1333.59	-1067.34	-2014.48	-1243.81	-1498.29	1120.08	6642.85	-819.164	3218.35	-4534.9	-4794.36	-1075.88	-2129.05	3700.61	-757.052	-3950.69	-2433.85	-3015.26	966.488	2476.44	-5047.72	-6874.91	-5575.44
25	fret	0.491047	0.416493	0.537013	0.425604	0.436718	0.484027	0.489042	0.540996
26	donor	71934.1	64904.9	47114.8	38034.7	50565.6	41197	48551.6	35821.3	32333.8	50809.6	108981	147904	142192	152181	148417	160170	143656	150309	154924	142141	90276	80527.8	27368	10644.8	9461.54	10660.7	6906.88	3921.67	10464.6	8763.07	9302.07	9136.22	9777.28	6299.32	6174.93	8460.09	11505.9	12196.4	11920.5	10579.4	14811.6	7909.93	7901.95	14095.6	9362.67	11845.6	10131.3	9711.9
26	acceptor	83587	85691.2	95000.4	97307.1	95168.2	82828.5	90423.7	98731.1	101835	54145.3	4620.94	1938.49	4854.2	3882.42	2675.99	3075.08	973.98	2423.4	-855.7	-1974.38	-6013.29	2455.29	1871.49	2501.17	2304.66	1346.11	552.778	1522.8	-3701.9	2069.99	4522.8	1309.41	-135.356	4956.92	4604.87	256.075	-2177.65	2366.83	805.24	2178.91	1173.82	2547.6	-2331.14	-715.585	7.639	-2463.04	3075.28	-951.759
26	fret	0.537491	0.568902	0.668557	0.719216	0.653059	0.667446	0.650855	0.734095	0.759531	0.515808
27	donor	46217.4	17753.1	28982.2	15398.6	16452	14031.4	16565.4	20993.2	11043.5	13735.3	19137.3	18143.5	58848.4	58443.6	47038.9	37116.6	37650.5	50487.3	44588.1	20389.2	47484.3	59580.8	54201.1	63037.8	67891.5	52906	66221	74605.7	67028.1	63348.3	66528.2	40829.1	37262.1	20900.8	-471.299	-477.195	49.5093	-821.125	-740.547	-337.002	-1191.26	-1856.85	-412.34	1102.26	-325.211	643.689	-1170.3	-1516.85
27	acceptor	113066	113258	111181	123241	120968	109960	118051	127259	107374	111200	102029	105158	114200	118632	108908	106336	89476.1	80554.6	87523.2	97347.4	75978.9	76805.8	81976.5	72171.6	78165.6	66395.8	61058.1	43341.6	26431.8	58632.9	53440.9	90267.6	86664.1	44334.9	2556.22	3919.38	9474.13	2870.84	2243.89	1565.72	6695.89	989.993	4811.42	2574.2	4770.01	2549.66	3180.05	5506.02
27	fret	0.709555	0.864761	0.793245	0.888993	0.880555	0.886882	0.876999	0.858231	0.907068	0.890397	0.842058	0.853117	0.660207	0.670104	0.698326	0.741629	0.703525	0.614853	0.662916	0.827091	0.6158	0.563336	0.602461	0.533993	0.535019	0.55633	0.479195	0.367566	0.282908	0.480277	0.445116	0.688718	0.699194	0.679931
28	donor	175481	174929	191881	161607	165229	153221	146992	156111	155578	158389	162540	153536	168286	143664	157590	181664	168273	177860	168130	155165	172932	192753	191977	184553	182424	166679	180621	177142	174083	152618	153411	143004	165599	155533	166524	148941	182939	140358	118504	161667	246255	246433	235631	221353	212616	227617	241195	243914
28	acceptor	47821.8	51114.3	58084.9	52378.9	52024.6	61678.7	59135.9	59622.7	58601.5	46190.3	70330.3	62703.4	56330.1	60092.3	58011	55129.7	59202.9	63323.9	53990	72078.8	43276.3	44934.9	39783.8	49938.6	48225.1	79178.5	60899.6	61043.1	62710.1	63986.5	55297.2	49209.4	48449.7	43895.9	42236	45973.6	47713.1	54018.1	68702.4	44866.6	-3808.2	3853.85	-2938.79	-3672.47	-4581.38	4260.39	-2643.66	5160.61
28	fret	0.214093	0.225924	0.232685	0.244898	0.239524	0.287211	0.287211	0.276559	0.273318	0.225924	0.302268	0.289695	0.251083	0.294694	0.26929	0.232685	0.260522	0.262901	0.243358	0.316828	0.200347	0.189019	0.171759	0.21263	0.20899	0.322048	0.251863	0.256578	0.264492	0.295531	0.265289	0.255793	0.226672	0.219979	0.202496	0.235715	0.206804	0.278186	0.367269	0.217028
29	donor	13947.2	12841.8	12930.2	13006.8	33717.6	16953.8	17211.5	18319	68383	77520.4	57434	61169.6	65946.9	64917	60816.9	60425.5	62844.3	71920.2	73010.5	72213.5	69664.2	80129.1	76284.5	69732.1	73867.8	81075.9	88596.7	68779.9	78597.7	67344.5	71869.5	74605.4	81122.3	72808.8	79551	73627.3	75377.6	68960	79785	72387.2	76351.4	79634.1	78090.9	74972.1	78429.5	80095.6	72665.4	75425
29	acceptor	63534.8	63754.5	62477	62786.9	47338.3	64905	57220.5	64733.2	-3522.34	-3086.57	-251.203	-5870.43	-2346.88	-175.315	-1544.14	729.365	5908.41	667.21	-1828.33	-3404.3	-5446.46	-145.997	4590.09	3918.15	-501.544	-1361.82	-2879.97	1642.11	-6230.52	-9829.09	-3713.68	463.068	3046.53	-1581.04	-6318.68	-2430.98	-2221.01	637.508	-2736.84	2279.39	-1435.66	-2101.76	-2732.61	2372.29	-1914.87	958.295	240.021	-1140.58
29	fret	0.819824	0.832482	0.828273	0.828273	0.583804	0.792492	0.769075
30	donor	17320.7	14433	22122.2	24227.4	26712	23893.7	27380.1	19888.3	15461	19349.7	16160.5	18214.1	27286.1	23560.9	30508.3	23958.1	22522.7	21709.8	24581.4	19796.8	28774.9	24377.3	23682.9	25081	13336.3	19553.8	26223.4	14613.4	12789.3	29646.3	34456.2	21818.2	21982.5	28018.7	19736.7	27955.1	28067.8	24835.4	24158.8	24034.3	20066.9	26752.6	25997.3	27949.2	76788.3	77708.8	90069.2	70471.9
30	acceptor	41950.5	55753.9	26606.8	43571.2	43460	47593.9	42333.9	51051.7	51047.8	53891.3	41389.7	46510.1	44787.3	39097.4	27286	42628.8	49046.1	38959.7	46688.8	49356.5	32106.4	48054.4	47016.3	48022.6	48209.6	53132	47437.5	42139.4	42997.5	43093	44821.2	50553.4	54939.4	47188.6	45255.5	43856.6	39690.8	46279.7	49173.4	45782.5	47614.4	54802.2	35338.7	44366.9	-3123.42	72.265	-856.214	-2249.24
30	fret	0.708024	0.794863	0.54579	0.6427	0.619615	0.666083	0.60764	0.719525	0.767414	0.735747	0.719525	0.718371	0.621801	0.623971	0.471911	0.640489	0.685234	0.6427	0.654911	0.713765	0.527025	0.663843	0.664963	0.65714	0.78289	0.731098	0.643807	0.742743	0.770968	0.592513	0.565815	0.698874	0.713765	0.627258	0.696594	0.610898	0.586069	0.650461	0.670571	0.656025	0.703443	0.671695	0.576446
31	donor	22910	26671.9	27287.3	28498.5	26181.5	33122.6	19862.4	29722.8	29531.9	38388.6	22580.9	24285.8	17124.1	15379.8	22738.9	23996.1	19270	18483.4	21336.8	16442.8	34310.8	8757.88	9699.17	10242.2	14481.3	15030.9	10110.6	14369.4	20336.3	12384.8	11038.7	25628.6	13540	17788.9	18203.6	12154.4	15195.5	17150.4	28343.8	24032.3	10304.7	31661.3	28781.5	22643.5	27053.7	20231	18865.2	17189.9
31	acceptor	35107.7	29093.1	25643.4	41592	29031.6	24388.5	31628.9	31708	31152.3	38197.6	32486.3	40432.9	41952.1	49995.1	39689.7	47413.6	35761.9	34406.1	27238.3	38830.9	41527	37686.6	47255.8	41259.7	51163.4	41782.2	40997.3	38339.9	38093.7	52610.4	48891.3	29840	52465.7	37388.8	38298.9	40008	39796.6	38162.6	30956.1	34117	36224.9	21481.7	21120.5	31470.3	35989.5	52758.7	34931	42878.9
31	fret	0.604799	0.52212	0.484118	0.593868	0.526115	0.423922	0.614731	0.516126	0.513128	0.49913	0.58989	0.624656	0.709745	0.764899	0.635566	0.664291	0.64944	0.650431	0.561025	0.702839	0.548068	0.811035	0.829646	0.80123	0.779638	0.735377	0.802211	0.727495	0.652411	0.809075	0.815935	0.538093	0.795345	0.677151	0.678139	0.766865	0.723552	0.689999	0.52212	0.586907	0.778656	0.403805	0.422917	0.581933	0.570987	0.722567	0.64944	0.713692
32	donor	57744.5	56741.3	49741.1	55753.3	55205.1	48859.1	54141.9	52761.6	48192.3	51170.7	63598.9	55359	51917.5	47236.3	50136.2	54004.6	54524.9	53222.6	55734	57861.8	55406.9	47744	55304.3	47667.3	61186.6	73027.2	56087.1	60814.9	47803.9	53344.5	57142.3	51137.4	51827.6	56812.6	44144	62429.7	57371.5	60120.8	55269.7	79221.3	107203	94196.1	90510.2	102576	95480.5	98975.9	100617	99630.8
32	acceptor	38980.4	49723	47062.9	47032.5	45052.1	43866.6	42831.3	38598.2	64583.9	50003.2	47111.6	47843.6	53607.1	59036.4	50241.5	50175.3	43067.9	50373.1	48700.4	47799	48016.2	57650.8	44927.4	56036.6	33244.9	8314.57	36025.4	47273	49170.9	48797.5	49169	51179	37912.6	44514.7	55060.7	42640.5	39640	34469.9	48175	27756.3	-1000.34	-1501.34	-617.192	-1456.52	1094.44	3398.41	-6729.85	-4753.54
32	fret	0.402662	0.467043	0.486002	0.457091	0.449141	0.473023	0.441203	0.422394	0.572612	0.494003	0.425359	0.464056	0.508033	0.555387	0.501014	0.482005	0.441203	0.486002	0.466047	0.452121	0.464056	0.547294	0.448148	0.540231	0.351681	0.102608	0.390856	0.437238	0.507029	0.478011	0.462065	0.500011	0.422394	0.43922	0.555387	0.405617	0.408574	0.364383	0.466047
33	donor	23542.6	19021.8	25004	31808.2	22432.6	26954.3	26953.9	21096.1	24011.2	32509.1	28275.9	26459.4	24218.1	31314.6	24357.8	29313.7	18455.5	27785.6	19537.5	16602.9	15804.7	20492.5	17385	19577.9	17297	20795.4	36397.9	27477.2	19945.3	53237.4	74314.4	54180.5	65747.7	56043.7	61832.6	60603.2	51198.7	51177.9	62126.6	49694	57906.5	57476.2	47199.6	41674.9	63371.7	58660.6	60393.8	52826.2
33	acceptor	35279.7	29956.3	20296.3	45857.2	26194.5	21117	21372.6	13432.7	21428.4	31896.8	38918	32231.2	36682.1	23503.1	32104.5	32409.3	25797.5	21416	31325	25261.7	28058	36018.6	22642.4	14079.9	18043.1	40081.1	24708.9	35708.9	49697.8	8870.84	-4799.34	2379.39	78.171	-2695.23	-1403.81	278.278	-486.914	277.764	1009.42	2518.89	2192.11	1325.51	-2068.26	-3778.6	669.133	1482.26	2450.58	1361.18
33	fret	0.599609	0.612092	0.447666	0.590913	0.538801	0.439242	0.442406	0.388943	0.471668	0.495352	0.57925	0.548753	0.602497	0.428656	0.568489	0.524772	0.583146	0.435015	0.615915	0.603459	0.639636	0.637751	0.565543	0.418008	0.51063	0.658345	0.404071	0.565543	0.713314
34	donor	24661.4	22981.5	24650.5	16895.4	15861.4	17410.9	21567.1	37094.3	18230.7	20753.6	15665.8	31860.6	32890	24560.5	23722.1	19129.6	27044.6	24767	23237.7	26052.5	25243.6	19292.6	24776.3	24040.4	16993.3	21682	13993.7	19058.2	17963.6	19404.4	22649.3	23125.9	19655.9	24563.6	19523.9	14554.2	26894	25263.8	23464.4	23874.2	24970.3	22286	29812.8	37235.6	54056.1	48763.4	69283.7	56914.4
34	acceptor	29868.5	44312.6	27348.9	44204.1	30502.1	34620.7	18002	12273.3	36309.9	27955.3	34209.3	30643.4	40036.9	38669.5	37503.5	42400.5	23657.2	32851.2	40062.1	42831.2	48306.9	49217	29358.1	38620.8	44871.1	38745.7	50227.8	40341.8	41841	50635.2	31520.8	35542.2	48057.4	38620.6	31731.6	48441.1	34577.7	20840.4	41715.8	38312.8	39738	27427	27912.5	18753.6	6800.44	-155.353	1645.02	-2733.56
34	fret	0.548219	0.658344	0.526063	0.723597	0.658344	0.665641	0.45518	0.248082	0.665641	0.573936	0.685558	0.490042	0.549218	0.611592	0.612543	0.689145	0.4669	0.570012	0.633298	0.622019	0.656507	0.718358	0.542213	0.616342	0.725338	0.640763	0.782294	0.679254	0.699847	0.722726	0.581749	0.605869	0.709578	0.611592	0.619183	0.768958	0.562129	0.451967	0.639832	0.616342	0.614444	0.551212
35	donor	25839.4	22984.2	16742.7	19713.4	20107.4	26975.4	18129.5	20570.7	15953	22627.1	26539.8	16387.1	19399.3	20783.1	11957.2	17710.8	12109.6	18161.8	12616	16230.1	13344.1	16719.6	16870.4	14593.9	17578.5	19437.8	21106.3	19445.5	16873.5	22074.5	26724.5	21237.2	17892.5	16399.4	9840.81	11578.6	14798.6	14972.6	11655.5	8203.09	13111.6	14403.1	20115.1	16331.7	17920.2	15745.2	12429.8	19748.8
35	acceptor	23252.8	22685.7	23475.1	19494.8	26969.8	23551.3	34802.5	28647.2	25541.1	21334.3	24882.9	33219.1	34484.9	25166.8	34516.3	26851.5	30544	37222.8	37903.6	30368.2	29993.8	27100.5	38607.9	28167.6	34645.9	29475.9	27101.2	26407.7	29086.7	18216.1	13166.1	28970.8	37691.7	32800.4	37117.4	32782.4	26311.4	28798.6	34382.3	42619.1	34216	32797	25331.7	29451.8	35496.1	30170.2	29791.9	30617.1
35	fret	0.473502	0.496501	0.583515	0.497501	0.572511	0.466503	0.65755	0.582514	0.615527	0.485501	0.483501	0.669558	0.63954	0.547505	0.742618	0.602522	0.715594	0.67256	0.750626	0.651547	0.692575	0.618529	0.695577	0.658551	0.663554	0.602522	0.562508	0.575512	0.632536	0.452505	0.329558	0.577513	0.678564	0.666556	0.79067	0.738614	0.63954	0.65755	0.746622	0.83873	0.7226	0.694576	0.557507	0.643542	0.664555	0.65755	0.705585	0.607524
36	donor	1588.65	13883	10125.1	9605.79	5677.97	8667.38	7234.95	16448.1	13034.3	10807	14134.2	9905.58	13867.2	12044.2	7492.52	5816.25	15928.7	14385.5	10514.6	5335.96	15029.4	14799.3	10169.5	7416.51	15453.7	7229.68	9036.83	11007.6	9556.18	11875.3	11883.7	12027.3	13489.3	14582.9	11611.4	5230.41	7661.41	12283.8	9809.52	11013.9	10622.3	7089.28	10628.6	8151.2	6972.11	12922.4	9139.22	19116.6
36	acceptor	30684.3	25370.6	24384.4	26025.5	28352.6	25693.6	22552.6	21617.6	33098.9	37660	20460.7	28434.3	32239.8	29299.3	19855.2	33283.4	31197.4	25789.3	22772.5	27571.5	20673.8	21004.2	24167	30639.4	27566.6	25410.3	29090.2	17930.8	14492.5	19738	19441.9	21136.4	29656.3	31241.1	19852.1	27414.3	33014.2	25624.6	28622.4	30396.7	26768.4	20668.4	25040.3	37109.6	16890.6	25675.7	35462.4	21491.2
36	fret	0.951025	0.646106	0.706547	0.730238	0.83305	0.747796	0.757107	0.567934	0.717869	0.776802	0.591201	0.741595	0.699351	0.708605	0.726113	0.850842	0.66245	0.642025	0.68395	0.838279	0.579053	0.587149	0.703463	0.804869	0.641006	0.778878	0.763321	0.619621	0.602353	0.624707	0.620638	0.636928	0.687031	0.681899	0.630815	0.839325	0.811127	0.675751	0.744695	0.734366	0.715809	0.744695	0.702435	0.819471	0.707576	0.665518	0.795506	0.529649
37	donor	29149.5	31089.6	31085.4	39503.2	27764.2	47184.5	19411.2	28542.4	25377.7	28855.3	45878.6	41643.6	23698.3	40314.7	33874.7	34673.7	33092.4	35599.9	22740.7	21476.5	19165	28133.5	20001.6	18073.9	32614.6	32912.9	30102.9	25023	24078	15464.1	25002.1	32276.7	31821.9	29716.9	33613.9	32353.8	39190.3	37022.7	31834.4	31844.8	31475.6	36472	21610	25258.7	21935.5	34982.4	46875.8	59463.8
37	acceptor	42486.6	46515.2	45458.3	43882.2	52099.2	40466.3	61428.4	39133.1	58195.3	45302.3	29273.1	44451.8	51677.4	41832.7	30082.8	43671.5	37752.4	39473.9	51790.1	49559.2	42021.8	41631.4	53705.5	52568.4	48385.1	36064.8	52111.3	53082	49232.3	48575.8	54857.4	35065.6	47196.7	47317.4	37464.3	25722.8	41868.3	33718.8	38109.2	33802.6	35922.7	31251.1	48839.4	53108.3	50893.6	40245.3	24239.4	25807.8
37	fret	0.592799	0.599853	0.593806	0.526473	0.652375	0.461479	0.760093	0.578701	0.695966	0.610946	0.389862	0.516453	0.685813	0.509443	0.470459	0.557582	0.532489	0.525471	0.69495	0.697997	0.686828	0.596829	0.728499	0.743777	0.597837	0.522464	0.63417	0.679726	0.671618	0.758052	0.686828	0.52046	0.596829	0.613973	0.527475	0.442542	0.516453	0.476449	0.544528	0.51445	0.533492	0.461479	0.69292	0.677701	0.699012	0.534495	0.340357	0.302862
38	donor	48396.3	28568.9	34908	42945.5	34330.1	38289.7	21119.3	19875.5	13091.9	23677.4	23440.9	44403.2	83696.6	89742.1	94922.1	103010	87293.9	90580	83117.8	92028.5	99923.4	92429.4	93066	93966.7	97938.1	91667	101322	93920.6	92904.9	86053.4	97421.5	19118.1	-3087.09	-2254.24	444.776	1146.79	2679.98	-1192.41	-2050.43	-189.299	-1392.87	-1070.8	3392.05	927.882	-277.366	2207.78	2611.2	2770.56
38	acceptor	56834.8	69864.7	63544.3	59498.3	60515.7	63835.5	70504.6	74907.1	69472.4	65864.7	71250.7	60463.1	10337.9	1632.7	1151.91	-3567.33	6625.44	-2981.53	1449.57	4685.05	-2105.33	-5458.97	-7987.4	-6744.65	-2263.46	-3231.95	-1680.99	1699.71	-2376.15	182.374	-1410.75	-3362.98	-1998.42	4808.94	-4148.38	-4313.68	-372.425	284.322	-3010.2	1415.59	-1805.35	-428.767	-3737.24	-5314.37	2702.16	2317.57	4982.35	3043.57
38	fret	0.540345	0.709958	0.645714	0.581191	0.637787	0.624898	0.769014	0.790609	0.841527	0.735578	0.752306	0.576216
39	donor	60904.1	55321.9	40140.6	53736.6	58083.8	75624	67658.7	43141.2	51069.3	57337.5	60356.4	48924.9	39826.3	91334.1	73761.5	117914	93458.4	82591.8	99961.8	90004.6	91216	95412.5	1043.38	921.651	-521.909	1328.78	1712.27	1883.04	807.609	-1379.3	-558.544	1367.19	313.619	-775.403	-472.864	1580.5	-2023.38	1581.09	1559.82	1841.09	-1365.12	-2291.05	-1012.94	3113.29	867.88	-2351.32	-209.325	369.755
39	acceptor	38209.7	36030.2	32122.9	34021.6	41567	44562	43031.7	21520.6	39392.5	37322.1	46748.6	28840.8	32192.6	-755.046	-1158.01	-7879.93	2542.68	-5997.8	-3326.21	2608.76	428.506	-8003.32	2952.31	3782.75	-160.949	-2179.18	-1216.71	5386.71	1169.01	-5475.88	4540.14	841.649	1236.29	-621.681	-1386.54	-1183.64	-468.822	-2019.05	-1440	2373.28	-245.46	-1211.21	1951.3	-1121.72	-847.374	-5742.18	-4714.92	-1790.87
39	fret	0.386007	0.393929	0.44484	0.387142	0.417416	0.371184	0.388275	0.332746	0.435033	0.393929	0.436127	0.371184
40	donor	46462.1	49818.4	53685.6	56793.4	67506.4	63705.2	50682.2	47279.2	43793.7	56616.2	65781.6	66112.6	59474	59625.1	66652.3	64049.9	52654.3	59207.6	55028.7	48273.4	33926.6	63979.8	51075	53306.6	45286.5	57946.9	56787.9	60439.5	60215.6	59301	70965.8	59257.1	61002.5	48018	53670.5	68448.5	52096.7	47482.4	40328.9	45463.7	44492.8	54504.1	58349.3	68697.1	51892.1	53136.3	42053.8	41159.8
40	acceptor	45678.9	54135.8	45253.4	48889	40679.8	41896	50199.6	53130.7	42901	41350.9	50073.4	44393	44463.4	39905.8	50445.3	45078.4	45698.6	53458.3	43039.6	60351.6	70516.4	42563.4	53581.6	49319.6	50759.5	41894.6	38180.1	47686.2	42775.5	42124.7	37658.5	37485.9	39867.1	57430.5	56455.9	45514.8	48215.1	61931.2	61683.5	63102.1	64097.8	44279.4	36489.7	40124.6	53752.3	55734.7	61905.2	55776
40	fret	0.496163	0.521156	0.457083	0.463103	0.375558	0.396741	0.497164	0.529144	0.495162	0.421916	0.431973	0.40178	0.427951	0.400772	0.430968	0.412858	0.465109	0.474132	0.439008	0.556068	0.675093	0.399764	0.512164	0.480144	0.528145	0.419904	0.40178	0.441018	0.414872	0.414872	0.346252	0.387667	0.395733	0.545105	0.512164	0.399764	0.481146	0.566027	0.604796	0.580953	0.589898	0.448049	0.384641	0.36849	0.509165	0.512164	0.595859	0.574986
41	donor	12264	13257.3	11032.8	15419.4	7193.58	6683	13559.3	13381.6	5273.99	15042.9	15877.3	21383	17833.8	22625.6	13572.9	12952.4	5485.61	6677.73	17281	9479.17	13213.7	6048.91	14143	6503.01	7219.94	9107.15	14807.2	7883.4	11454.5	8095.01	5615.14	8750.19	13108.2	9471.64	11236.8	9845.16	10385.9	14294.3	21915.5	15795.2	16712.5	21421.4	32725.1	18868.5	10434.1	9839.14	12136	21252.7
41	acceptor	38596	32339	34597.1	32572	40666.6	34916.6	41021.8	32821.9	31941.9	38578.3	31088.3	27912.9	25439.9	35058.9	35717	28018.1	33793.3	29208	24845.9	27781.3	35458.7	34771.7	31229.8	46655.6	38695.9	33786.3	50521	31330.5	34526.3	44609.2	37038.5	37640.8	22459.9	42369.2	38506.5	35874.3	34511	30719.7	23965.5	41026.5	22570.9	25013.9	23360.3	38209.9	36816.6	33761.5	39952.5	30171.3
41	fret	0.7589	0.709278	0.75799	0.678448	0.849928	0.839398	0.751613	0.710206	0.858668	0.719469	0.661467	0.565928	0.587478	0.607876	0.725009	0.684082	0.860412	0.813754	0.589428	0.745218	0.72871	0.851679	0.687831	0.877783	0.842929	0.787832	0.77341	0.798593	0.7507	0.846439	0.868245	0.811086	0.630986	0.817308	0.774314	0.784235	0.768885	0.682206	0.522267	0.722241	0.574767	0.538231	0.417028	0.669028	0.778828	0.774314	0.767073	0.586503
42	donor	30889.2	34734.9	27120.6	39358.4	40903.6	26336.2	20345.1	30466.5	22639.9	27138.4	28405.6	25798.9	25894.7	19195.3	32780.2	30067.3	29271.7	24875.5	33938.4	31890.6	27512.3	28065.6	26501.6	27654.1	41952	31697.1	25220.3	27521.7	36201.3	40134.3	33297.7	35064.7	30591.5	38337.3	39615.8	37814.1	39484.3	56310.8	80460.6	81475.1	85862.8	87112.1	80069.8	79162.4	75792	84608.7	61735.6	19378.5
42	acceptor	48980.7	49319.8	52790.1	37810.9	50778.4	50034.2	65013.4	48895.3	58896.9	50239.1	54355.9	52670.3	54904	41290.3	43236.8	49846.8	45372.2	52484.4	48216.6	50152.9	55421.1	51021.8	49226.2	54506.6	49285.6	36439.8	54975.5	50277.6	43319.3	36211.2	53537.5	45471	44368.4	41777.2	46519.9	51397.2	39678.5	17745.1	-927.606	-4143.1	-6147.48	-68.518	4700.92	-2806.61	-934.842	-847.691	-1275.26	-2692.66
42	fret	0.613533	0.586454	0.661036	0.489876	0.554086	0.655392	0.761845	0.616414	0.722115	0.649734	0.656334	0.671342	0.679737	0.682527	0.56886	0.624091	0.60776	0.678806	0.586454	0.611611	0.668536	0.645006	0.649734	0.663852	0.540204	0.535224	0.685314	0.645952	0.545172	0.474545	0.616414	0.56493	0.592286	0.521218	0.540204	0.575719	0.50105
43	donor	41737.4	75833.4	40317.2	87428.1	66272.9	102423	87364	44389	78309.5	60048.8	63644.9	118964	39828	59374.1	100106	72409.3	47462.3	89327.4	2213.51	1488.21	-6854.46	-5555.66	-2971.56	-2016.86	-525.773	-8200.49	-269.387	-758.545	-9472.3	-3271.8	3964.36	4041.95	5664.6	-1821.2	-6000.96	-4523.37	-3042.4	-12896.4	6808.22	-3507.95	-3268.43	-5494.94	2196.64	-5970.6	-6945.54	-7320	-9566.75	-2529.63
43	acceptor	18322.3	10373	18491	14312.6	16907.6	1905.91	-4157.87	2944.23	-3555.05	358.319	-2731.11	-1862.4	-87.811	-3375.18	1390.05	-2978.4	-5914.43	-1895.48	-36.061	4173.01	-2173.32	-2140.25	1680.82	-1632.39	2356.2	5388.07	-1037.28	-3330.56	5043.66	-5146.83	1749.94	-4843.47	4668.52	-436.981	-2727.89	-1329.38	4803.03	-783.766	2106.93	-2289.48	-1765.94	-5080.64	5535.46	-904.831	3256.51	653.669	5636.1	-6230.43
43	fret	0.305236	0.120175	0.314647
44	donor	25432.7	25843.9	21981.6	34101.6	55374.7	78547.2	62062.3	66922.8	62871.8	65111.8	81402.9	83707.7	79535.3	85581.1	85814.9	80516.5	86063.4	75178.7	91363.1	80940.3	82905.8	77615.6	65110.5	74346.2	81948.8	77458.7	77956.2	76606.5	82248.1	82491.5	75495.1	83549.5	84263.8	76489	78031.9	80923.2	79162.3	74059	80749.1	82083.5	69755.7	46791.6	86949.8	25211	73668.2	62389.5	70642.2	73421
44	acceptor	52458	57117.3	47795.8	43225.5	14207.1	6420.28	-994.53	1742.68	-3251.47	-2069.71	2331.71	-1881.17	-1676.89	-458.465	3343.52	-993.078	1068.04	-3607.85	-1129.33	-6276.96	-453.215	-2399.29	-2613.02	2565.13	-703.837	1837.04	5771.94	-3667.37	2121.64	-663.46	-339.119	1910.03	-3563.39	191.69	-1025.33	1600.69	648.856	1383.29	-1056.91	-2368.05	-1391.68	4886.95	2849.18	745.769	2407.41	2782.71	-1335.54	-2463.34
44	fret	0.673667	0.688305	0.68538	0.559423
45	donor	44537.5	32771	45059.5	35241.6	44117.4	44596.3	40013.4	52888.4	75206.6	79029.7	87073.6	80323.4	80544.2	79653.5	84251.2	81158.3	94637.1	85628.2	72771	77425.2	88664.6	78270.6	92430.4	85988	80755.3	90941.9	88371.7	83182.8	89739.7	81904.8	81307.8	89637.1	90897.3	90435.6	82846	88666.9	81544.2	75039.4	86365	78188.8	84150.9	73971.7	94561.3	86513.7	74264.6	87265.4	91102.5	78959.8
45	acceptor	32701.9	37165.8	36303.3	34100.7	37277.7	33829.8	28879.9	26240.7	5821.28	-5618.34	-3135.42	3531.09	2152.56	-2683.33	-5381.48	-140.765	-285.953	-997.042	-518.91	-5534.57	-2158.28	3177.22	183.922	290.339	1810.09	-1424.31	-0.315	751.266	4152.81	-5142.67	-1065.58	-6127.34	5973.91	1704.56	-1407.24	-3835.91	3533.44	-2733.7	-246.92	3468.85	-4517.05	-977.487	-870.349	-2127.16	525.184	-4207.69	378.26	-1748.35
45	fret	0.422917	0.531107	0.446021	0.492126	0.458062	0.430957	0.418895
46	donor	24344.5	32340.4	30418.5	22420.5	20781.7	26366.6	21909.4	38783.3	37601.6	40690.9	26172.8	36934.2	29676.2	26962.5	34900	33543.1	27516.5	40677.7	28414.1	36252.4	33046.4	31023.2	32602.5	30387.7	21576.8	33860.3	28788.5	29286.3	32951.7	28759.9	25551.6	30888.8	32067.3	24570.3	34459.4	32174.1	30035.3	32018.8	34863.6	30110.2	26839.1	30611.3	31566.1	29452.6	29869	38164.4	33625.7	35175.3
46	acceptor	30051.1	30435.8	25729.4	36751.9	27636.4	29919.3	31580.8	23312.2	14177.2	21652	26167.6	13239.1	28072	27098.7	18552	21991.1	18206.2	27780.3	21607.4	23205.2	24597.7	21222.7	33277.6	38136.9	21000.9	24347.8	17385.6	24200.6	24385.2	24870.2	24871.3	24478.8	30516.4	29266.2	14713.6	26521.6	27635	27316.8	19327.1	24500.1	26870.2	27884.5	16695.2	28902.8	26151.9	29900.1	16497.4	27018.6
46	fret	0.552241	0.485328	0.458114	0.621225	0.571058	0.531362	0.590796	0.3756	0.273983	0.347801	0.500385	0.263502	0.486333	0.501387	0.346768	0.396097	0.398142	0.405294	0.431776	0.389956	0.42669	0.406315	0.505394	0.556208	0.493364	0.41855	0.376627	0.452047	0.425673	0.464174	0.493364	0.441919	0.487338	0.543304	0.299052	0.452047	0.479293	0.460135	0.357084	0.449011	0.500385	0.476273	0.345736	0.495371	0.467202	0.438877	0.329185	0.434818
47	donor	43527.2	106881	108308	74088.3	112095	104950	85428.1	61700.8	85420.9	67844.5	53568.9	61654.3	79942.4	67783.7	83883.2	63817.9	85921.6	90742.1	54598.8	51119.2	86926.4	91439.4	71166.7	49195.3	85631.9	78672.9	62594.9	90030.5	89147.2	115446	93102.3	64293.5	50536.3	35048.4	54988.5	48673.2	47282.1	48211.9	59022.4	73430.3	33889.7	30971.7	65087.4	40319.5	77693	72697.3	42111.1	26186.9
47	acceptor	88393.8	71414.9	61336.4	75408.2	65030.7	61049.1	91054.3	82164.9	68185	76569.7	74817.2	71263.5	85408.5	73529.7	80414.5	76866.9	81404.3	71150.6	64005.3	85556	85070.4	76656.4	82583.4	68865.1	82089.9	74991.2	68227.2	57313.7	41106.5	38707.1	84305.6	87424.7	89208.6	107604	102365	94326	101346	87213.4	109432	65698.3	61988.6	75118.3	65021.8	83789.8	53642.8	66257.4	87968.4	110373
47	fret	0.669859	0.401015	0.36191	0.504767	0.366678	0.36763	0.515702	0.570718	0.444057	0.530584	0.58285	0.535624	0.516929	0.520624	0.489259	0.545824	0.486915	0.439715	0.53943	0.626417	0.493975	0.456164	0.53689	0.58285	0.489259	0.488086	0.52186	0.389004	0.315849	0.250853	0.475371	0.576082	0.638131	0.755105	0.649977	0.659122	0.682334	0.644063	0.649977	0.471937	0.647049	0.707961	0.499969	0.674512	0.40814	0.476521	0.676069	0.809154
48	donor	15572.6	11005.3	13175.9	17487.9	14581.9	13395.7	15322.9	9521.54	15375.3	20237.5	11814.2	7906.54	5147.93	9891.59	12121.8	7294.02	10874.2	15268.6	17548.6	12144.4	11639.6	13511.5	16978.6	21422.7	13487.1	15220.6	20769.5	23634.9	24784.8	21902.3	22606.2	20489	26261.4	26909.2	28841.8	21900.5	12072.1	14008.2	18335.7	15630.5	18964.5	13638.2	8473.83	17410.1	14400	23425	20275.5	14617.1
48	acceptor	15994.8	36742.2	30185.8	24887.7	29142.8	12364	22579.8	25211.8	24656.5	14753	31607.2	40172.1	34316.2	35004	31266.6	29532.5	24862.8	23681	19416.6	26877.9	36593.8	33226.3	21118.4	21456.9	32635.2	35432.7	39704.8	15580.7	21687.3	21369.8	18561.7	18333.5	16763.5	18143.8	21005.8	18562.5	24619.2	24445.4	26729.6	29568.1	20795.1	32493.4	21275.3	27553	18315.2	14374.7	26258.7	24662.3
48	fret	0.506509	0.769246	0.695817	0.587059	0.666553	0.479795	0.595768	0.725431	0.615906	0.421839	0.728096	0.83517	0.8695	0.779577	0.720981	0.801723	0.695817	0.608264	0.525762	0.688552	0.758844	0.711143	0.55472	0.500383	0.707551	0.699437	0.656367	0.397002	0.466276	0.494233	0.45054	0.472529	0.38937	0.402432	0.421839	0.458951	0.671162	0.635813	0.59287	0.654508	0.522737	0.70395	0.714728	0.613045	0.559662	0.380607	0.564588	0.628247
49	donor	29288.3	24089.8	24140.9	39004	39144.5	42005.5	37888.5	41852.3	39685.2	45833.1	35687.4	32098.3	22544.4	27900.3	41200.9	24243.1	33686.3	47663.8	42375.9	37956.6	34474	46744.2	35717.2	49077.3	30540	46471.7	44283.3	41515.9	28981.7	31033.9	37530.9	19513	21795	36377.1	30586.8	43104	52887.8	36679.4	41703.3	55880.8	38935.9	41111.5	30071.7	41486.1	37339.3	34380.3	40630.4	43734.1
49	acceptor	39461.9	36140.4	31623.5	17652.2	30877.3	24879.9	18687.8	22859.3	20656.7	12714.3	18191.4	26976	35831.8	25013.5	38503.7	33361.2	14535.5	15514.2	17231.2	19826.9	25297.3	16492.6	30149	16867.5	12612.5	26337.5	20375.6	16508.6	19736.7	19088.7	31673.1	25891.2	35926.5	12514.1	25195.3	21082.1	14693	17165.5	17805.9	28719	25715.8	21363.8	14698.3	17851.3	8813.95	15510.6	29702.6	23133.8
49	fret	0.574073	0.59972	0.566659	0.311746	0.441058	0.372362	0.330173	0.353485	0.342247	0.217267	0.337599	0.456912	0.61376	0.472907	0.482977	0.579387	0.301695	0.245238	0.288979	0.34318	0.423389	0.261179	0.457908	0.255848	0.292608	0.361955	0.315416	0.284463	0.404927	0.380924	0.457908	0.569833	0.622453	0.255848	0.451943	0.328321	0.217267	0.319093	0.298964	0.33946	0.398173	0.342247	0.328321	0.300784	0.190607	0.31083	0.422412	0.345991
50	donor	9126.82	19790.3	21993.4	15733.6	26727.9	56599.1	66482	61370.2	57443.2	62782.9	65919.6	62370.7	61706.4	70029.9	63660.1	59928.9	67608.6	63250.6	69549.7	60119.3	62210.7	72411	64655.3	70137.2	65162.2	68051.2	61768.1	61430.1	62560.3	66938.9	58366.8	67294.7	65688.9	64978	63063.7	63925.6	69675.8	72876.8	68874.7	95806.9	69394.2	68566.2	66638.4	67824.1	89364.7	72729.3	63711.1	72649.7
50	acceptor	85979.6	66657.1	66076.1	70094.9	53392	16344.2	-6120.66	-3385.64	877.337	-2237.49	-4711.58	-161.086	-7630.44	-2003.49	-4720.75	1181.21	504.105	-10478.6	-5101.76	-4538.98	-4569.59	-1401.81	-7492.09	-7619.87	-11537.3	-7882.53	-8816.08	-6452.49	-9376.78	-2981.83	-2475.77	559.796	-5894.94	2145.98	-7996.21	-3159.35	-2167.41	2403.63	-11314.4	-6081.91	-5448.82	-4013.92	-999.823	-4848.23	-4756.48	-741.292	4181.38	-3866.3
50	fret	0.903731	0.770929	0.750513	0.816654	0.66627
51	donor	55901.3	75157	60736.6	46391.4	58734.2	43106.9	65441.3	59154.6	55980.7	57413.9	52796.8	62108	44650.7	67349.6	67607.8	51927.6	56747	50642.7	61152.9	44865.3	70584.1	107886	117423	129305	128924	117833	131019	137912	128261	111130	113391	113133	107086	96277	122412	102546	118670	125779	112442	110235	120061	120176	138433	122174	122744	125099	111987	141956
51	acceptor	56804.5	61229.7	57844.3	72089.8	51595.1	66410.8	59826.9	52074.6	66605.8	63186.8	57960.8	56647.8	65211.6	53066.9	60838.4	63928	68734.1	61690.9	60656.8	65598.7	39584.2	-336.115	-7469.52	-5443.15	-2346.94	-1764.84	-1424.15	-2954.43	-1303.22	-4091.64	-3739.78	-5709.75	-5709.9	-1987.03	-7031.43	-2982.75	-3294.6	-1259.66	-5166.65	-2513.77	2200.95	-263.477	-5251.89	-4205.48	-183.982	-5268.29	-3436.49	-1106.84
51	fret	0.504166	0.449053	0.488156	0.608766	0.468117	0.606781	0.477138	0.468117	0.543111	0.524152	0.523153	0.477138	0.593872	0.441018	0.474132	0.552083	0.548096	0.549093	0.498164	0.593872
52	donor	52988.8	30958.5	50642.1	56152.3	36232.7	47282.6	43603.9	33644.6	48659.9	37152.2	35382.7	39546.9	27257.6	24937.7	17118.9	23354.2	40268.4	42172.1	31741.9	35628.7	44607.5	42469.9	37517.5	38383.3	47021.7	59621	82638.3	43101.7	37323.3	31289.6	46426.1	54671.4	40283.2	45468.7	36215.2	48498.9	35377.1	32138.7	56623.1	49407.3	46646.2	35243	43897.1	45794.3	29835.5	38626.6	24772.2	40191.7
52	acceptor	39582.8	40049.9	31432.2	22982.3	34473.1	31991.1	30242.2	44085	32684.5	38168.5	43776.8	40301.7	54404.7	41906.1	44782.3	54236.9	35620.3	42568.6	41884.2	35491.2	31067.3	40416	42982.9	44477.6	46025.7	31322.2	34055.8	50871.2	45889.2	45737	33848.3	30447.2	41244	53693.1	35188.8	41992.9	43580.6	54965.5	26447	44021	41181	38136.4	49295.6	38563.2	44062.5	49809.5	43920.5	43458.5
52	fret	0.427883	0.564311	0.382818	0.290465	0.487476	0.403325	0.409204	0.567375	0.401367	0.506541	0.553095	0.50453	0.666725	0.627102	0.723749	0.699364	0.4695	0.50252	0.568397	0.499506	0.410185	0.487476	0.533791	0.536831	0.494489	0.344062	0.291415	0.540889	0.551059	0.594036	0.421975	0.357581	0.505536	0.541911	0.492484	0.464522	0.552077	0.631255	0.318121	0.471493	0.468504	0.519641	0.528736	0.457563	0.596094	0.56329	0.639574	0.519641
53	donor	27065.4	33243	21593.1	35386.3	44220.8	30582.9	32182.3	26383.9	28544.9	31344.6	37778.5	25759.8	24347	29728.6	21542.1	29070.1	29363.9	26457.9	38353.7	56821	66574.5	74240	64529.2	75294.5	70874.6	68411.4	68106.2	72146.8	70745.4	72902.2	71475.8	80488.5	71242.4	74210.9	74010.8	75876.9	78702.6	85869.1	85943.1	77909.7	77977.5	83693.5	79580	79144.4	83797.7	86181.7	83414.3	75949.9
53	acceptor	58990.2	58159.4	61619.3	39297.6	46576.8	64172.1	48202.4	52310.6	50181.2	58128.6	36079	58970.7	51136.8	45857.9	50752.2	53595.9	53684	56346.8	42832.9	21320.1	-1664.56	1610.7	-4745.93	4720.27	6642.28	2621.89	1061.06	-1633.52	-2109.04	524.726	3.525	-402.967	-1769.57	2471.61	2122.62	4027.75	-1535.41	2353.39	-2971.41	4782.38	-521.281	4571.84	-2492.27	3067.36	-2746.39	5246.13	4423.44	-2615.82
53	fret	0.685895	0.636555	0.740132	0.526485	0.513383	0.677611	0.599315	0.664647	0.637499	0.649711	0.488944	0.695967	0.677611	0.607014	0.702346	0.648774	0.645957	0.680377	0.527489
54	donor	73421.2	120470	49505.3	44156.2	64609.5	101689	70366.1	123354	150540	94550	128253	57813.2	87742.9	77730.6	72756.6	253053	365718	257384	295300	351600	291173	351289	325626	334620	320652	293617	394512	295193	325680	323750	294925	359415	344847	318980	400472	408404	401780	355470	367648	384724	385143	338468	362985	365943	310758	360133	365686	356842
54	acceptor	275222	251564	282521	316567	278459	226752	201071	199629	222196	278783	189949	289344	327276	238344	264442	-30611	-26067.1	5561.91	-22248.7	-6621.5	25180.8	-7557.84	7443.81	10501.6	-10514.3	-6527.05	-10517.2	-23644.3	-38072.2	-31799.2	22356.2	36242.7	-58395.3	-12574.7	-6357.96	4672.75	-15214.7	-23454.1	2972.49	-5187.61	-2536.89	-27725.2	3977.28	1581.07	-22812	-30843.8	-34823.3	-22306.3
54	fret	0.789607	0.675824	0.851077	0.877775	0.811788	0.690318	0.740271	0.618244	0.595779	0.746545	0.596798	0.832992	0.788553	0.753875
55	donor	24142.2	27387.4	26682.4	32696.4	22203.5	24658.2	26257.8	31060.7	31288.2	30134.7	27809.7	35204.6	39354.3	23211	23490.8	31112.5	28005.7	33423.5	35617.6	22298.3	27787.6	33306	18145.7	34455.4	23642	31067.7	21357.2	26096.1	32344.5	24912.4	20403.2	25564.4	24006.7	27361.8	25071.2	30578.5	27582.9	23540.2	19858.2	25759.3	28074.4	33730.1	37217.2	41277.3	38808.1	34778.2	29975.3	30574.4
55	acceptor	39297.4	42088.1	36665.8	35635.2	42004.3	49361	38141.3	28617.5	40528.1	39252.3	41457.7	30414.1	33825.3	46948.7	40159.1	35964.2	37410.3	39289.9	37653.9	44172.8	32021.2	34930.8	37088.5	29302.9	38399.3	34812.5	40060	34881.8	41985.7	45777.9	41366.6	39229.5	37597.6	32720.4	43213.9	35186.6	37633.6	45387.9	42189	36140	34019.7	39710.5	31642.7	32609	30906	25117.7	28811.4	28989.6
55	fret	0.619623	0.605869	0.57925	0.521648	0.653863	0.666529	0.592087	0.479574	0.564409	0.565399	0.59898	0.463465	0.462457	0.669447	0.631386	0.536601	0.572329	0.540582	0.513658	0.664582	0.535605	0.511659	0.671393	0.459431	0.618642	0.528631	0.651912	0.572329	0.564409	0.648008	0.669447	0.605869	0.610785	0.54456	0.632365	0.534609	0.577274	0.658738	0.680137	0.584194	0.547541	0.540582	0.459431	0.441241	0.443265	0.418932	0.48962	0.486608
56	donor	44491.1	58003.1	63807.9	48970.6	47123.3	36068.8	44649.1	41066.6	37059.5	50408	28045.4	44820.1	34701.2	38485.9	42746.7	51663.4	41763.3	45798	38848	30532.3	31787.8	43684.1	38912.4	47459.6	43849.6	39228.5	43152.9	25571.2	48448.5	48834.6	34956.7	91280.5	90328.4	90313.7	91480.9	81376.7	73070.2	92916.5	92554.4	69368.2	82367.5	71754.1	86674.2	81395.1	75174.9	91161.1	87966.4	82852.7
56	acceptor	43561.9	37384.8	40513	27486.9	32957.7	43271.6	39088.7	39456.7	33056.8	49836.2	40637.4	53305.7	33164.3	38555.5	43164.8	34141.8	45073.5	47988.3	55165.7	39241.4	27526.9	45241.7	38772.2	48091.1	48120.6	34514.5	30367.1	55210.7	39822.3	36149.5	45494.2	971.015	-2129.57	-2509.7	8009.88	2395.01	-2444.94	-5721.67	-4132.8	5836.46	5587.47	7504.8	18.438	-12162.3	3664.21	534.707	3038.66	1005.85
56	fret	0.494238	0.391567	0.388665	0.359826	0.411973	0.545076	0.46719	0.490213	0.47118	0.497261	0.591681	0.543023	0.488203	0.500287	0.502306	0.398351	0.519524	0.511413	0.586462	0.562586	0.464202	0.508374	0.499278	0.503316	0.523594	0.468187	0.412949	0.683076	0.451293	0.425667
57	donor	20129	7988.1	5737.04	7500.05	11965.2	8568	1980.69	8909.36	10039	11892.5	742.743	11283.8	9023.15	5704.13	1710.62	-3045.13	4277	2445.44	7474	14131.2	11983	26218.7	2604.46	12347.7	7386.26	13769.3	8329.46	993.623	1092.33	9058.8	-396.498	10462.6	5861.79	6326.54	7532.95	9190.41	4625.21	7487.71	4329.09	2966.39	1975.21	4637.55	3627.18	3710.8	711.212	1378.85	11183.7	4390.78
57	acceptor	33204.8	47244.3	42597.1	49159.1	56085.4	42057.3	58096	46898.2	47054	54861	39630.6	52591.6	48902	56383.7	47456.2	39600.8	45786.5	38917.9	41202.3	44473.7	42938.4	32302.7	49829.3	56511	49977.3	42062.7	52087.5	50691.8	46285.1	57331.7	48517	41228.3	48078	44571.4	62043.1	47089.6	38102.8	51474.3	44828.8	50069.2	52607.8	48207.3	55205.9	48667.9	46578.3	48914.5	51577.8	50044
57	fret	0.622954	0.855651	0.880842	0.86768	0.824097	0.830606	0.967381	0.840389	0.824097	0.821929	0.981973	0.823013	0.844744	0.908391	0.96514	1.0832	0.915029	0.940569	0.846923	0.758474	0.782026	0.552223	0.950604	0.820846	0.870967	0.75314	0.862208	0.980849	0.977478	0.863302	1.0079	0.79707	0.89184	0.875353	0.89184	0.837126	0.89184	0.873159	0.911709	0.943912	0.964021	0.911709	0.938342	0.929446	0.985348	0.972988	0.821929	0.91946
58	donor	28018.1	31354.2	27379.6	27428.9	28888.6	32672.2	25099.8	27876.4	24428.4	24945.8	25886.1	29327.9	23969.6	19614.2	29513.7	29683.1	26666.2	28110.5	23129.9	24131.8	19647	26928	27033.7	26407.5	24073.3	28647.3	24357.6	25453.9	28072.5	26239.2	22242	26478.4	24358.6	23794.1	28170	27075.8	23952.1	26231	25849.1	22056.2	21290.4	26934.1	17711	47424	43391.9	49663.8	49102.3	51887.2
58	acceptor	33349.5	30771.1	19353	24842.2	22916.7	21722.9	17853	24024.4	29748.3	28044.1	21582.8	24268.1	14580.4	22274.2	20274.7	25542.7	18074.2	26173.3	21535.6	23945.4	31582.1	26294.5	24085.3	24646.8	18480	20724.7	17238.4	26961.3	22188.5	22547.4	23375.1	19095.5	28646.7	22767.9	22403.4	31933.6	32006.7	21942.5	29184.9	28615.9	31076.9	23415.8	16124.6	-980.216	-4795.54	-24.762	2308.07	5293.5
58	fret	0.543126	0.495508	0.414369	0.475226	0.442436	0.399499	0.415505	0.463313	0.549187	0.528851	0.454591	0.452373	0.37859	0.531926	0.40753	0.462224	0.404095	0.48167	0.48167	0.497622	0.616535	0.49445	0.470908	0.482741	0.434646	0.420038	0.414369	0.514387	0.441326	0.462224	0.512306	0.418906	0.540083	0.489143	0.442436	0.541098	0.572111	0.455688	0.529877	0.565186	0.593589
59	donor	42702.3	43574.3	39595	38253.6	24044.8	36157.6	34071.1	24024.4	42756.7	31738	26755.2	39142.1	37798.3	48045	40337.7	37131.1	31293.7	30742.4	28742.5	31049.6	48849.3	41805.9	28492	25407.5	38716.7	37707.7	30537.6	46003.4	41677.6	37571.4	27468.8	39348.4	41850.1	31715.9	31366.2	31789.2	35918.9	35433.7	31213.4	32732.8	29419.9	38616.7	19560.7	20526.3	32899.8	34877.6	27588.6	30645.5
59	acceptor	48518.1	56901.5	51066.3	42240.7	58344.2	37728.4	40361	57431.7	50334.4	54238	53428.5	31310.7	47140.9	44210.7	52290.3	53541.7	45871.6	45542	49574.5	53411.8	58122.8	41846.2	39588.2	51478.9	39982.4	59887.2	48585.2	47615.8	46756.8	49489	49252.7	49424.8	48549.9	43528	57646.6	52127.6	43337.7	39681.8	47803.2	50010.3	55849.2	41175.1	57649.5	61635.3	53660.7	42138.7	45240.1	47879.2
59	fret	0.532332	0.566005	0.563051	0.524349	0.707896	0.510322	0.542279	0.705093	0.540293	0.631167	0.666489	0.444247	0.555156	0.479005	0.564036	0.590503	0.594402	0.597323	0.633088	0.632128	0.543272	0.500258	0.581709	0.669333	0.508312	0.613825	0.613825	0.508312	0.528343	0.567973	0.641717	0.557132	0.53731	0.578771	0.647454	0.62154	0.547239	0.528343	0.605096	0.604125	0.655084	0.516342	0.746828	0.750506	0.619611	0.547239	0.62154	0.609954
60	donor	34186.2	32114.9	59064.8	65229.9	70707.5	88799.4	90091.6	79545.7	80984.6	72948.4	79308.9	72093	69963.6	72461.1	83799.8	76571.6	76319.6	77549.2	80735.6	91912.4	85774.9	82637.4	79897	94102.9	85348.7	94878.9	54002.6	71590.4	62460.5	68187.1	73733.5	68549.1	68683.6	63389.2	76661.8	85027.9	89040.7	81097.7	87850.8	82597.7	80853.3	73794.6	68497.2	81407.7	70339.4	74630.2	90081	80714.2
60	acceptor	48476.7	50415.9	29109.7	17543.8	-207.288	-2776.67	-1013.09	-2691.39	1238.8	-1876.22	2693.9	-1427.54	-3061.31	1245.76	-12.58	-381.721	1862.96	-701.777	-3927.86	79.754	610.602	-971.293	847.392	885.33	-230.238	-4519.5	-4953.37	-3423.35	-954.961	-4653.62	787.622	-1033.35	-3347.83	-4746.45	-2451.74	-2800.51	-2201.44	-8348.8	-5240.88	-4402.82	587.018	959.529	-2743.24	1147.51	-1934.61	-700.197	-9013.26	-4760.68
60	fret	0.586215	0.610403	0.33011
61	donor	54000.7	56559.3	41632.9	54785.5	72706.4	82014	76512.4	74465.1	80722.7	82386.2	76332.8	73559	81360.8	74319.8	80699.4	78731.7	75955.8	80799.5	80636.4	82369.7	82227.2	78212.8	78436.3	74955.2	75776.3	72511.8	78210.8	81709	76907.9	80280	73317.8	70391.2	72966.2	74698.8	70234.9	80360.2	84089.4	71397.3	69184.2	75514.5	77242.3	74318.4	76330.8	73592.6	74485.7	81344.4	81736.4	75280.7
61	acceptor	30742	24553.2	18293.8	31219.4	5944.84	-4526.45	251.239	-5920.27	-295.469	194.144	106.125	-1501.26	1046.49	6.103	35.26	-2336.28	676.454	-2857.09	-602.936	1160.26	-5083.44	-2960.11	-2528.87	-3311.87	-577.599	-3213.54	3602.36	-4414.94	-919.758	576.781	-4467.79	-2386.87	517.657	1086.79	855.315	-1531.25	-6149.07	-939.288	-4202.01	-4677.82	-4521.68	-351.345	1161.84	-6770.34	-8973.55	-1799.33	-3596.2	-1731.8
61	fret	0.36305	0.302671	0.305377
62	donor	29131	25576.4	10356.4	18939.6	6774.54	12302.7	9491.42	11870.2	19933.3	24896.2	7505.43	5394.89	26947.9	11217.4	37994.7	23264.7	15567.1	9286.12	36402.9	31106	31690.4	26004.8	32220.1	36350.9	28157.8	43906.1	41484.9	26531.8	37778.4	38824.1	26518.1	28697.1	31255.2	31739.7	29811.2	31899.9	23372.8	23918.9	28179.7	23853.2	8032.38	9169.78	8868.66	15352.2	13589.3	14225.8	7216.64	24896.2
62	acceptor	37136.4	29584.4	54366.1	44069.4	53725.8	54913.7	65589.5	67250.6	42301.5	50386.5	52461	56175.3	39066.8	54955.9	46474.1	47010.8	58133.5	58124.6	36872.3	39879.9	44209	45267	48573	49477.4	43056.4	40840.6	46819	35177.7	47889	44416.6	43845.7	49828.3	41576.4	39688.8	34738.8	37656.2	45888.6	49177.6	36986.9	47861.6	55834.4	62702.3	53526	60812.5	58476.3	54057.5	62427.1	28490.3
62	fret	0.560597	0.536787	0.840117	0.69979	0.888002	0.816897	0.873327	0.850293	0.679632	0.669034	0.875164	0.912649	0.592148	0.830854	0.5497	0.669034	0.788863	0.862286	0.502829	0.561586	0.582308	0.635138	0.600978	0.576398	0.60489	0.481722	0.529817	0.570479	0.558618	0.533801	0.623454	0.634166	0.570479	0.555648	0.537782	0.541758	0.662276	0.672891	0.567517	0.667104	0.874246	0.872408	0.857677	0.798229	0.811305	0.791675	0.896234	0.533801
63	donor	48396.9	45111.1	23888.9	27325.7	28074.3	28282	26744.3	41385.7	38346.8	27746.5	25593.8	30975.6	34034.7	25523.6	30186.5	27604.9	32816.7	35521.1	32360.8	35343	33694.8	38248.4	29435.2	37093.8	39258.6	35476.6	29138.5	32582	26490.7	29428.5	41168.6	29748.1	28625.9	38210.6	31757.9	27488.9	25858.1	35491.4	28466.8	29874.9	39826.5	40360.6	32358.1	34042.8	23348	23717.6	37112.7	38251.1
63	acceptor	17195.4	27361.3	31769.4	39764.6	27906.2	39261.7	43463.4	37860.3	35981	36358.1	31825.9	27269.1	32153.6	38684.8	23559.3	27619.1	35452	36537.6	33881.4	40558.6	31103	17476.9	24639.7	21988.5	24023.6	37052.4	32624.5	28697	36013.8	32791.1	24550.3	37418.5	41286.2	32309.3	32353.9	38624.4	32564.4	38769.5	37775.8	41996.6	36604.2	37215.2	38975.9	29087.5	33019.9	41527.5	34843.6	32960.1
63	fret	0.262192	0.3771	0.570844	0.592681	0.498295	0.58122	0.618907	0.478207	0.484218	0.566704	0.554324	0.46822	0.486224	0.602093	0.438481	0.500312	0.51954	0.507384	0.511433	0.534836	0.480209	0.313363	0.455292	0.372289	0.37999	0.51042	0.528711	0.46822	0.576027	0.526663	0.37325	0.557414	0.590593	0.45827	0.504351	0.584341	0.557414	0.521573	0.569808	0.584341	0.479208	0.480209	0.546101	0.460257	0.585382	0.636885	0.484218	0.463241
64	donor	35211.4	27623.4	27339.9	21592.5	8372.34	20383.9	21049.4	22212.4	18891.7	30038.2	34103.7	19372.3	18485.7	30833.6	28697.5	35307.5	23488.3	30011.8	27349.5	27402.4	27758	22399.8	20845.2	31902.8	40423.1	21063.8	27229.4	33541.5	33565.5	37717.5	34180.6	22339.7	27251	34584.3	31189.2	43424.1	32344.9	27496.1	24913.1	39510	30288.1	24122.6	23380.1	24833.8	35180.2	35857.8	24384.5	26049.6
64	acceptor	19227	21882.2	19972.7	19680.2	29713.4	29617.6	15147.8	9518.22	30170.2	13933.4	18726.6	19942.6	15947.9	8282.44	23945.5	18347.9	16456.9	14178.9	6540.16	6610.43	17108.3	18975	10346.1	11893	23633.2	24859.6	15601.2	16091.6	25792.5	13858.9	8641.93	9743.37	21988.5	9487.42	4860.5	14051.8	11836.6	17976.7	19638.5	10801.2	17217.8	16901.8	19116.2	19964.8	18473.7	17517.2	13897.5	17133
64	fret	0.353607	0.44251	0.422306	0.476917	0.779512	0.591749	0.41833	0.299759	0.615123	0.317	0.354522	0.507257	0.463193	0.211496	0.454858	0.341811	0.412427	0.320496	0.192858	0.194331	0.381526	0.459015	0.331968	0.271328	0.369306	0.541	0.364656	0.324008	0.434379	0.26887	0.201743	0.304033	0.446605	0.215283	0.135021	0.244739	0.268053	0.394899	0.440469	0.214524	0.362803	0.412427	0.44969	0.445579	0.344517	0.32842	0.362803	0.396828
65	donor	23957.4	34356.6	36288.9	40229	29027.7	36328.5	29675	20824.9	22661	17909.5	24866.9	37387.1	26961.5	25767	32994.2	32579.1	24940.5	27937	27003	28527.7	23998.9	18820.9	18783.2	31267.6	34043.4	33954.7	28648.4	28222	32614.9	24008.3	26886	35688.8	47024	35260.5	44925.7	27897.4	28829.6	29759.9	52745.4	27603	13207.1	34734	24497	15231.9	34058.5	28729.6	22908.2	27821.9
65	acceptor	35721.7	29291.6	17036.1	25188.8	11083.8	16578.3	32443.5	27828.7	33501.1	37087.9	34785.7	11535.7	23724.1	27790.9	33553.7	36709.6	26542.9	25951.4	26381.8	24553.8	35718.1	27514.3	26075.6	25393.8	27899.8	23642	26421.1	39792	38660.8	23468	26122.9	37680.1	25930.4	19672.2	25283.3	38285.2	17401.7	35167.1	21393.2	8860.36	29932.7	31141.5	29476.5	37503.6	40226.6	31579	25866.9	33384.1
65	fret	0.5983	0.46054	0.318951	0.385463	0.276197	0.31351	0.522401	0.571958	0.596359	0.674683	0.582725	0.236086	0.467718	0.519395	0.504309	0.529401	0.515381	0.482013	0.4942	0.462593	0.5983	0.593444	0.581748	0.448184	0.450248	0.410742	0.479976	0.584678	0.542346	0.4942	0.493187	0.513372	0.355643	0.357785	0.359925	0.578815	0.375917	0.541353	0.288329	0.242815	0.693398	0.472833	0.546315	0.71104	0.541353	0.523402	0.530399	0.545324
66	donor	28557.5	17787.3	20176.9	22921.9	27386.6	24825.7	21868	20816	18340.2	21942.1	35328.7	32911	30885.7	27473.5	38563.2	33986.6	26796.1	36544.3	20257.5	32515.4	28456.5	24689	28447.5	22399.1	18600.9	20118.1	53077.8	47744.5	56863.2	50152.7	70378.3	59059.8	71139.4	79811.4	57852.5	70221	76838.3	80589.2	75001.5	69363.4	67538.1	65675.1	55339.6	57286.9	47051.1	57301.6	48048.7	52839.4
66	acceptor	33033.5	32730.1	38576.2	34958.5	28587.8	37227.4	41311.6	37824	44311.2	32373.7	30939.5	34140.1	30858	35845.7	38615.8	34065.6	33618.1	25188.5	36998.4	33278.3	30488.9	33106.8	33862.6	34677.1	44852.6	34432.6	4080.12	-488.377	1905.04	2332.88	89.854	3892.13	-3044.16	2395.31	-2716.29	-243.865	-2939.8	1369.77	7893.09	1482.39	-401.922	880.599	2471.46	2995.02	-1625.8	-827.432	-289.2	-82.981
66	fret	0.536064	0.647614	0.656718	0.603586	0.511027	0.599742	0.653996	0.644865	0.706945	0.595882	0.466818	0.508914	0.49935	0.566423	0.500417	0.500417	0.556399	0.407769	0.645782	0.505736	0.517339	0.572388	0.543211	0.607414	0.706945	0.630997
67	donor	36173.5	49870.1	32633.1	18726.5	20044.1	24267.3	34557.9	23320.5	17386.3	27479.6	18157	36777	71369.3	47859.8	39587	43937.1	28108.2	28702.9	29043.6	28408.7	32699.7	42989.1	88900.5	105641	105984	119037	121836	118455	96523.3	103314	62129.7	100930	111235	83983.4	98733.6	89778.1	73829.7	118494	120897	80756	89521.6	113294	118153	87808	100277	64748.5	114955	92677.3
67	acceptor	71245.9	66948	73411.3	76769.9	69046.3	61733.2	60520.3	73787.7	82472.6	65545.1	65099.4	71647.7	44231.9	49948.3	69639.4	63483.7	71217.1	70488.6	58035.8	65634.1	61069.7	59434.5	12661.7	-2527.48	-884.513	5551.75	-989.351	-1367.16	1627.51	-655.368	-6.792	3875.56	-3378.32	956.953	-2906.01	712.341	1544.91	-308.546	-578.813	-877.174	3070.85	-2158.38	336.682	-1741.55	20.992	401.418	4876.88	930.289
67	fret	0.663518	0.573564	0.691856	0.803932	0.77482	0.718264	0.636431	0.759805	0.82563	0.704511	0.782348	0.660382	0.382883	0.51066	0.637469	0.590986	0.717205	0.710853	0.666656	0.698179	0.650998	0.580729
68	donor	21132.6	25653.3	22451.6	20480.5	22473.6	18144.1	25682.7	16822.7	18051	20806.6	21191.4	24319.7	17729.8	17467.5	15035.5	14307.4	21142.4	22365.8	27720	22767.8	18744.8	23111	22677.1	10566.3	18242.2	20701.1	22919.8	14810	12056.9	19129.7	18266.7	17166	16178	16043.1	20353	19838.2	20772.2	25425.3	22503	20228	12064.2	23721.5	23621	28536.4	25829.8	13898	23432.2	27717.6
68	acceptor	24629.6	24083.7	26167.1	29066.7	19356.8	16378.7	32367.1	27021	28805.8	33971.4	21525.6	17078.1	23809.1	28628.3	34185.6	30132	36712.4	20072.7	23231.4	23932.4	17358.1	18888.8	34753.4	26664.5	17596	23404.6	18214.3	25588.2	28649.6	20966.1	25454.7	24071	27089	25198.5	34201.7	28834.8	32056.6	27833.8	19670.3	24991.6	30299.9	25824.3	19654.8	14840.3	19032.8	26395.8	19895	16836.4
68	fret	0.538313	0.484089	0.538313	0.586968	0.463146	0.474106	0.557521	0.616573	0.614526	0.620669	0.504109	0.41262	0.572732	0.620669	0.69492	0.678327	0.635029	0.473109	0.456184	0.512138	0.481092	0.450222	0.605325	0.715723	0.491088	0.530246	0.443276	0.632975	0.704272	0.523197	0.581879	0.583914	0.625793	0.611457	0.626819	0.592061	0.606346	0.522191	0.466133	0.55246	0.715723	0.521185	0.454196	0.342081	0.424466	0.654577	0.459167	0.378215
69	donor	14961	10825.3	14538.5	15907.1	16250.3	15277.8	15449.2	16243.6	14568.8	11845	10929.8	11916.4	12467	13459.7	13185	14709.8	15191.9	13059.7	9967.41	8040.9	7796.5	5051.97	10499.5	14049.7	12175.4	10779.8	14739.6	12369.2	13772.1	15476.7	7383	17997.6	15957.1	13831.1	14327.2	11403.4	11761.9	11799	5805.38	11484.4	13048.5	13401.9	15906.5	11963	17155.5	19616.3	19696.6	16709.9
69	acceptor	17825	21771.5	18236.1	20968	9114.93	18277.5	24139	23014.3	17952.3	27341.1	26650.7	18825.6	26887.6	21566.1	13194.8	21168.3	22895.2	21114	18830.6	27187.6	24235.9	24296	23683.6	19221.8	9593.53	33250.4	19688.3	16341.5	18760.1	14839.4	23462.1	16945.6	12127.8	17251.5	15273.9	17610.7	21289.9	19939.6	27482.6	20102.5	20124.4	15992.6	19931.5	19000	22407.3	15855.5	13349	15470
69	fret	0.543285	0.668309	0.556709	0.568906	0.359172	0.544326	0.610192	0.585875	0.551572	0.697924	0.708985	0.612106	0.683263	0.615919	0.500557	0.589816	0.601524	0.617818	0.65396	0.771776	0.756969	0.828052	0.692782	0.577934	0.440391	0.755393	0.571927	0.568906	0.576936	0.489525	0.760896	0.485072	0.432121	0.554658	0.515763	0.607313	0.643936	0.628184	0.825915	0.636563	0.606351	0.544326	0.555684	0.614014	0.565874	0.447417	0.404388	0.480595
70	donor	16217.3	22991.7	19391.3	21233.1	17556.3	17256.2	22635.2	24629.8	25583.7	25119.2	19290	18296	22793.8	18654.4	16175.2	16318.6	14815.2	16599.6	23943.6	16955.1	9463.89	16046.2	13929.2	17659.5	12670.5	15961.1	10349.9	19831.9	14577.2	13307	15245.3	9804.14	27535.3	17110.9	24115.6	15439.3	16873.9	17815.3	15466	18917.3	23630.1	15741.3	19547.1	15030.2	14837.2	15236.7	7924.17	10848.8
70	acceptor	37029.2	37968	43328.6	32596	45991.7	43077.9	26674.9	34631.2	34708.5	31065.4	40034.8	41785	35141.7	37305.4	32151.6	45069.2	41212.6	39112.7	40283	38525.5	37553.6	37215.5	28281.7	31480.8	45643.6	36591.1	38602.4	41594.7	34736.3	34883.6	42213.4	43435.5	46054.1	39277.3	30655.7	38404	39419	38801.3	45259.4	29685.8	31884.8	35268.7	40077.4	38020.5	38431.8	33520.3	31098.3	37502.8
70	fret	0.69516	0.622914	0.691208	0.60604	0.723759	0.713903	0.541343	0.584174	0.575221	0.553308	0.674411	0.69516	0.607033	0.6665	0.665511	0.734594	0.735578	0.702069	0.626882	0.69417	0.798454	0.699108	0.670456	0.64076	0.78276	0.696147	0.788648	0.677377	0.704042	0.723759	0.734594	0.81609	0.62589	0.696147	0.559287	0.712917	0.700095	0.685282	0.74542	0.611005	0.574226	0.691208	0.672434	0.71686	0.721788	0.687257	0.796493	0.775889
71	donor	9796.35	2692.48	-6008.63	4844.94	-4647.18	2426.27	12139	3628	10602.6	1361.45	9963.68	4814.51	-2091.61	-4449.43	-3323.76	9743.11	-10016.9	5042.69	-289.023	1003.97	9978.9	-4206.04	463.958	6442.17	16116.8	3065.16	6746.4	6153.14	-6092.3	15546.4	6571.47	1353.84	8655.47	4654.79	2038.37	6890.91	1057.22	6054.27	11652.2	19805.7	6290.05	12891.9	1642.87	-1954.71	-8914.07	19189.6	4061.53	15561.6
71	acceptor	67646.8	69298.9	74811.2	91658.9	77535.1	84664.8	92685.6	73841.7	91950.7	79963.5	90861.5	76495.1	64929.7	53156.5	51144.2	68014.6	54518.5	78488	66633.3	79175.4	76558.7	61148.6	49350.1	74908.8	71806.9	71277.9	87811.8	81240.5	72980.9	85431	78487.7	80711.7	77032.8	90463.6	87791.4	81621.5	75046.4	86332.7	59309.9	60847.1	83068.3	66732.3	74161.8	82280.7	87682.5	64778.3	65973.6	74453.1
71	fret	0.874063	0.963262	1.08797	0.949731	1.06344	0.972356	0.884007	0.952726	0.896901	0.983042	0.901226	0.940784	1.03289	1.09127	1.06994	0.874063	1.22433	0.939298	1.00461	0.987646	0.884007	1.0732	0.990725	0.920129	0.817261	0.958737	0.928943	0.928943	1.09127	0.846052	0.923061	0.983042	0.898341	0.951228	0.976926	0.921594	0.98611	0.934851	0.836385	0.755028	0.928943	0.837762	0.978452	1.02504	1.11293	0.771945	0.942271	0.826788
72	donor	96260.4	73934.3	87893.9	104014	86016.4	87153.4	80964.5	106439	83462	78828.5	78099	84986.7	86491.8	84305.4	87585	84476.3	105808	93971.1	82263.6	94897.8	110007	79431	80289.7	92163.7	91692.7	92691.7	91986.2	87160	93248.1	111607	111594	120819	108134	119235	108912	123376	122806	108822	117268	115070	124162	112189	122024	131221	114124	114735	115509	122979
72	acceptor	27084.9	18436.1	21121.9	20126	23167.4	27762.4	24528.8	20372.6	20460.4	30625.1	26242.3	18030	25436	19816.5	36954	31346.4	10409.3	4287.82	22701.9	5822.27	4158.64	16426.5	34167.8	16147.6	27779.1	24488.4	20467.1	21541.5	26558.6	8067.22	5477.05	-2779.31	-6518.13	1024.49	-142.853	-5343.62	-1371.21	-4308.72	-3623.47	1722.61	-4100.51	-579.741	1031.73	-721.369	-1629.17	-1423.55	-3072.13	5587.26
72	fret	0.219785	0.19968	0.193311	0.161677	0.212458	0.241876	0.232651	0.160778	0.196949	0.280002	0.251125	0.175193	0.22713	0.190586	0.296896	0.270657	0.0897641	0.0436647	0.216119	0.0575038	0.0367708	0.171582	0.298779	0.149119	0.232651	0.208801	0.182427	0.197859
73	donor	49488.7	47387.1	48794.2	31815.7	43703.3	40309.4	74273.1	53631	49939.3	59282.6	65569.2	55756.1	56055.1	72679.5	67071.7	45529.5	52355.5	68824.9	63163.1	75511.5	54593	66189.5	60418.8	60999.8	67120	68774.3	51625	64870.2	64011.6	57891.4	51863.3	41380.4	40765.7	54000.7	43916.8	65452.3	51111.4	58897.2	66741.3	62398.9	54125.5	68011.2	47894	54841.3	47611.9	27337.3	-3628	-2218.74
73	acceptor	42956.1	52866.6	45454.9	47420.2	44521.3	54570.9	39991	39468.5	47256.1	43787.7	44999.7	42361.3	41080.3	34098.5	40724.7	50439.5	36733.1	34267.8	30744.5	37549.8	38669.7	28307	30764.2	31331.6	32127.5	35840.2	28781.6	29688.2	31059.9	33790	50100.7	37848.8	46911.6	42323.7	47261.2	23670.7	38814.6	38063.7	42625.2	30181.2	34412	34348.3	31035.1	27165.6	41544	3454.68	-670.011	-1109.93
73	fret	0.465126	0.527677	0.482482	0.598408	0.504761	0.574544	0.350439	0.423453	0.485782	0.424466	0.407437	0.431598	0.422442	0.319262	0.377404	0.52535	0.412404	0.332447	0.327142	0.332447	0.4144	0.299542	0.337794	0.339586	0.323628	0.342283	0.357773	0.31406	0.326261	0.368922	0.491315	0.478105	0.534699	0.439836	0.518451	0.265804	0.431598	0.392717	0.389842	0.326261	0.388877	0.336007	0.392717	0.33156	0.466199
74	donor	46791.2	60816.9	41024.6	41871.7	58051.4	41106	62913.3	65453.3	60478.6	44867.8	44919.1	57609.1	56490.1	49621.9	45204.8	48600.7	59899.7	57617.8	48099.5	53842.3	40975.7	44504.4	36873.1	40726.3	49296.1	53333.6	29312.1	40315.3	53762.1	60931	56433.7	44572	46998	29260.7	51155.7	48089.4	47500.5	45323.9	49089.4	49781.1	51636.9	45991.8	60154.1	65997.1	59200.5	56052.7	48115.7	49768.5
74	acceptor	50411.3	36525.9	49280.1	50020.5	51365.5	47083.7	33960.2	32967.4	34212.3	44667.4	48073.1	39487.5	35102.9	32772.9	34118	37049.1	36561.9	29959	43098.1	33494.9	49286.1	52822.5	51359.8	45354.9	41690	37599	56827.2	39709.1	44605.8	41832.6	35581.9	49522.2	46409.7	51531.4	40306.1	47572.8	47924	52798	43935.5	51650.5	45269.5	39854.3	36996.1	32698.7	39626.6	35449.5	38659.9	50078
74	fret	0.518446	0.375465	0.54563	0.544621	0.469412	0.533536	0.350984	0.335368	0.361743	0.498384	0.517441	0.406946	0.38332	0.398076	0.429676	0.432647	0.379391	0.342195	0.472402	0.38332	0.54563	0.542603	0.582077	0.526489	0.458458	0.413855	0.659731	0.496381	0.453486	0.406946	0.386268	0.526489	0.496381	0.638175	0.440577	0.497383	0.502391	0.538574	0.472402	0.50941	0.467419	0.46443	0.380373	0.331471	0.401031	0.387248	0.445539	0.501389
75	donor	148453	182782	171964	184783	172146	170371	165859	192405	163032	184324	237009	236656	231151	196132	234813	243355	240161	235030	255303	257379	216846	230361	236372	213294	140523	-3934.6	-3000.97	-1267.82	400.85	-7076.79	-3325.07	531.524	-421.88	-2368.23	32.0401	-1544.64	-1288.45	-4427.21	5308	-2381.99	-1989.11	2426.3	913.229	3196.58	-1309.09	-1887.66	1128.15	5466.18
75	acceptor	82664.2	74907	61643.2	57841.9	73895.7	58391.8	65478.8	31891.5	30609.5	47822.8	-3152.93	-422.966	-1418.7	-1830.67	-311.552	-2162.44	3960.69	-4560.3	-1927.16	2666.53	2185.84	-1253.24	-765.174	-1582.73	-4791.67	1167.6	193.385	2644.28	1961.06	-30.749	-2801.39	2419.29	-1032.1	-3045.81	2381.95	1844.95	-7070.06	2992.28	522.317	691.378	-4588.73	-119.12	4058.18	2453.95	619.978	2084.44	-3704.16	-1671.72
75	fret	0.357554	0.290914	0.263523	0.23837	0.300761	0.255669	0.282907	0.14207	0.158199	0.206079
76	donor	60037.2	49917.3	52268.9	47310.7	66400.4	86640.2	56038.5	61035.3	122637	118788	133753	127805	144884	200033	209144	199371	155554	138576	134396	114734	129165	150367	126717	134749	122956	125854	164451	147585	134854	146589	151823	126589	118698	154710	121104	168139	132380	139675	131581	114359	107137	130275	107857	113012	119041	122449	124965	93920.2
76	acceptor	77889.3	72988.2	81743.7	79316.3	76536.6	55730	74035.5	62564.5	-3361.56	897.691	-828.309	2925.98	-1658.74	-3749.56	3253.88	-5062.17	-2382.97	2109.51	-1367.86	-2984.76	-283.354	300.049	-4782.51	-856.271	-2230.4	-1961.95	-2961.67	2528.21	-1676.46	-2310.71	627.719	2460.59	-98.297	-1587.78	778.76	-3525.89	-1088.92	-2664.25	-697	2638.65	-2333.26	-3325.03	-1326.96	-1616.42	-2414.31	-1135.34	-1456.28	-2014.81
76	fret	0.564198	0.593815	0.610318	0.625849	0.535592	0.391165	0.569059	0.505808
77	donor	39750.3	31009.8	44068.1	46523	42130.6	57567.7	49684.1	53720.3	53522.4	55233.1	54715.6	66002.4	51524.1	51604.8	50887.9	60202.2	49962.6	40403.2	29223	51613.9	31685.5	40875	30017.5	31064.6	50480	37590.7	45008.6	44943.2	38159.9	44905.1	49851.5	36777.9	45060.4	61371.1	55434	47197.2	40409.3	52763	28329.6	39461.1	52823.8	53400.7	41025.7	44498.8	48023.6	42667.9	41319.4	42771.4
77	acceptor	50465	75982.5	48677.9	47913	47329.2	39326.2	35726.1	39877.8	34433	31216.4	29453.9	35341.6	37611	37792.5	43424	45636.6	38606.6	54887.2	57169.1	35568.1	54397.3	63969.6	69278.2	49068.5	48456.5	49489.7	44870	60681.3	56004.1	45644	45192.4	59317.1	53748.8	29028.3	51085.9	46019.3	60400.2	47146.6	68746.2	60488.2	49133.2	50292.1	51709.6	52734	42927	43271.1	54676.3	37073.5
77	fret	0.559274	0.709795	0.524778	0.507641	0.528821	0.406345	0.418128	0.426003	0.391665	0.361499	0.349885	0.348918	0.422064	0.423048	0.460643	0.430933	0.435869	0.57561	0.661427	0.408306	0.632278	0.610547	0.698179	0.612612	0.489576	0.568455	0.499602	0.574587	0.595096	0.503619	0.475582	0.617778	0.544018	0.320994	0.479575	0.493583	0.599211	0.471593	0.707681	0.60539	0.481573	0.484573	0.557236	0.541982	0.471593	0.503619	0.569476	0.464621
78	donor	-2590.54	566.768	1125.66	-518.343	-185.587	-2538.09	2497.96	1534.08	730.137	-2614.62	-2246.61	-90.1452	98.1583	-2416.86	1629.52	-5474.43	1344.92	-5477.01	2708.62	3301.9	5171.18	3273.53	3724.08	531.515	3226.24	3494.51	1806.65	217.675	1062.89	-2761.65	1639.84	-2981.77	3922.7	1681.97	1062.89	-2506.28	1559.88	1317.4	-1111.63	-1956.85	522.057	2521.17	1072.35	1172.95	654.472	6669.02	1708.63	1009.58
78	acceptor	58083.7	61650.5	68160.9	60828.9	39844	45147.9	57733.6	50481.3	49906.4	55832.9	56045.8	60633.1	40977.7	54303.8	55157.9	53988.7	52102.3	58689.5	46755.8	63097.6	55828.8	63174.8	59704.2	59138.3	54242.3	69953.4	55367.2	51469.9	53619.7	56820.2	55735.6	51974	56515.5	57513.8	57454.1	65633.7	49920.6	50088.9	48443.8	56377.1	60032.6	59450.2	53067.7	52610.2	48336.6	57433.7	54128	57802.2
78	fret	1.04683	0.991006	0.98362	1.00898	1.00489	1.05957	0.958821	0.970428	0.985263	1.04922	1.04203	1.00163	0.997551	1.04683	0.971255	1.11294	0.974559	1.10282	0.945482	0.950493	0.915176	0.950493	0.941297	0.991006	0.943809	0.952161	0.968774	0.995916	0.980329	1.05082	0.971255	1.06116	0.935425	0.971255	0.981975	1.03963	0.969601	0.974559	1.02354	1.03562	0.991006	0.959652	0.980329	0.977858	0.986905	0.895599	0.969601
79	donor	26896	25506.9	26603	22512.2	32551.8	31617.2	28908.3	27712.8	27780.2	29130	21660.7	32276.4	29007.7	39036.2	38022.5	31825.8	25319.2	30678	30710.7	32447.1	30704.9	25238.7	33729	28354.4	29594.4	30730.4	31451.7	29997.9	34451.6	40741.8	29528.3	23174.7	25967.9	34174.3	28721.3	28180.4	19635.9	32463.5	25964.7	22469	19285.4	32029.2	31379.1	32627.6	24409.5	27608.8	43197.6	31166.6
79	acceptor	41295.6	47552.6	44968.6	46665	44968.1	38306.6	48899.5	46982.5	38110.6	49916.7	48570.8	48848.2	37091.1	34960	44543.9	39920.3	47746.2	37587	42852.3	46772	35069.3	42186.1	40621.1	37403	40398	48009.3	43403.4	44003.1	42556.5	30470.1	46335.8	43743.8	45925.6	43448.8	35033.5	42761.5	46649.9	40736.1	47070.3	49348.9	48406	40984	48965.2	45292	42663.7	46273.9	34297.5	36949.3
79	fret	0.605161	0.650735	0.628501	0.674747	0.579687	0.548096	0.628501	0.629471	0.578704	0.631409	0.691936	0.602232	0.560963	0.472962	0.539161	0.556019	0.653625	0.551069	0.582634	0.590483	0.533193	0.625591	0.546112	0.568858	0.576737	0.610029	0.579687	0.594401	0.55305	0.428156	0.611004	0.653625	0.639152	0.559975	0.549087	0.603208	0.703349	0.556019	0.644948	0.687169	0.714726	0.560963	0.609055	0.581652	0.63625	0.626561	0.442478	0.542142
80	donor	29769	36451.9	54234.8	57360.1	40521.5	56894.3	54092.2	58539.1	31449.9	47295.5	42511.1	37037.8	47856.1	35964.5	46693.4	48338.2	37413.3	40179.3	42375.7	41570.4	46677.2	41993.8	92374.3	55633.2	42180.7	51246.8	43709.9	54194.2	50392.8	46318.8	43585.3	48410.4	35985.2	43800.2	42656.4	40583.7	44493.5	48487.2	42761.1	45904.4	46773.8	41660.7	52508.8	41592.1	25556	43921.1	25512.6	42906.5
80	acceptor	54792.8	59614	48612.1	47313.2	54983.5	36412.9	44943.8	38764.9	56031.3	44385.8	52988.9	55411.7	54101.4	45551.1	42519.5	43377.7	69915.9	54420.4	63612.7	51412.4	51842.1	51019.8	-4057.54	40329	49292.7	34829.3	46525	37895.1	43017.8	42037.1	44635.8	51662.4	59406.4	47122.3	59299.9	58441	45411.5	50304	56965.5	46027.4	51297.9	35453.7	49644.6	55047.2	65802.4	48171.2	56099.3	50027.5
80	fret	0.648404	0.620269	0.47274	0.451858	0.575899	0.389927	0.453842	0.398709	0.640045	0.483726	0.554422	0.599566	0.531035	0.558503	0.476731	0.47274	0.651543	0.574873	0.600598	0.553402	0.52598	0.548309	-0.0458958	0.420268	0.53915	0.404576	0.515875	0.411433	0.460793	0.475733	0.505798	0.515875	0.622346	0.517894	0.582058	0.590287	0.504792	0.508818	0.570774	0.50077	0.522945	0.459799	0.485727	0.56975	0.720215	0.522945	0.687306	0.538135
81	donor	27822.5	28776.4	30758.3	18408.6	8570.81	18667.4	26000.8	12859.9	15455.6	12063.7	23429.8	25796.2	27327	10000.5	15389	14955.2	3653.13	15159.7	22978.7	18314.9	19769.3	18393.8	12011.9	24958.1	25680.4	16599.3	18275.5	21263.1	13370.2	18403.7	25581.8	21043.7	36038.3	26609.7	32488.7	22843.2	25520.1	24070.7	24327.1	22226.9	14025.8	22766.7	24243.3	22668.1	25845.5	27738.6	18115.3	23533.4
81	acceptor	38496.7	36270.7	35858.4	39267.4	53599.3	49170.3	44601.5	39544.4	35161.6	44788	33818.7	35327.5	22642	39813.3	39298.4	30517.4	48851.8	36867.4	37924.9	33378.5	48833.2	39406.8	30068.3	37781.1	44932	34896.9	40360.9	43081.3	47516.2	45374.4	37275.5	35747.6	38568.8	25946.9	25573.1	42649.3	30032.9	31539	33193.4	28069.4	41767.5	33881.4	43628.6	35181.4	44205.4	35117.1	40055.1	34762.3
81	fret	0.580378	0.55733	0.538302	0.680773	0.862241	0.725042	0.631542	0.754251	0.694851	0.787519	0.590404	0.578374	0.453308	0.799625	0.719002	0.67072	0.930037	0.708937	0.622508	0.645601	0.711956	0.681779	0.714976	0.60244	0.636563	0.677757	0.688817	0.669715	0.78046	0.71095	0.593413	0.629534	0.517283	0.493278	0.440328	0.651628	0.540304	0.567348	0.577371	0.558332	0.748205	0.598427	0.642588	0.608459	0.631542	0.558332	0.688817	0.596421
82	donor	24607.4	16267.4	11975.6	19334.6	8430.26	19573.6	11801.9	21350.8	8570.09	10027	16474.9	2442.48	25572.7	13976	30171.2	20286.3	22004.8	8926.43	9043.7	24790.1	21598.9	11820	14688.7	23452.7	4995.46	15376.5	11082.5	13391.9	14490.2	9039.19	13703.1	21468.1	26055.3	6197.53	24943.5	22537.1	23527.2	7189.85	17970.1	5286.39	9251.19	19057.2	22047.7	14977.4	19835.2	14535.3	15128.5	21317
82	acceptor	29866	28868.7	25200.9	34568.2	21957.1	30886.5	35466.5	34964.1	38761.3	38579	30757.3	28887.8	15469.1	14992.4	18071.9	20142.8	33997.8	33090.6	33772.7	25176.4	31766.8	26013.7	26228.9	23737.3	40029.9	29871.3	46603.6	23420.2	26396.4	21411.8	35414.3	19844.6	24509.1	23418.7	27745.7	26284	25484.1	17589.7	40647.1	36135.9	23864.4	26580.9	19460.1	17862	11293.1	37304.1	29971	31760
82	fret	0.548242	0.639667	0.677614	0.641713	0.723035	0.612108	0.750017	0.621282	0.819001	0.793834	0.650927	0.921685	0.376982	0.517047	0.375017	0.497998	0.607017	0.787557	0.788602	0.504007	0.594815	0.687914	0.64069	0.503006	0.888698	0.660155	0.807448	0.636599	0.645807	0.703386	0.720964	0.480002	0.484996	0.790694	0.52609	0.538166	0.52006	0.709584	0.693067	0.872795	0.720964	0.582635	0.469029	0.544208	0.363237	0.719928	0.66426	0.59888
83	donor	31348.9	39296.6	30761.5	26951.5	29288.4	27505.9	35493.9	26398.8	35256	26393.3	31960.2	34600.9	35865.4	31193.4	30671.8	31618	34725.3	30900.6	35166.3	27163.7	22094.6	30679.2	24389.5	28322.1	27897.6	32983.1	31729.6	42052.6	37819.8	37986.4	24285.1	31279.4	36740.1	38758.6	25950.4	29941.7	35025.4	32198.1	26892.9	24554.2	20786.2	23287.8	23736.1	31133	22974.9	24056.4	22480.8	24341.9
83	acceptor	34570.8	17605.7	27397.4	33009.4	32766.3	32712.4	39873.2	34871.3	37906.7	35810.9	45839.3	42000.9	36203.7	36043.2	26880.6	29608.6	34473.8	32481.8	38940.7	36142.6	26311.6	44181	45501.1	46696.2	43419.1	38658.2	39949.8	38415	32829.1	35450.9	35273.6	37929.4	40960.4	35451.7	37731.6	41335.5	39381.4	37605.8	48863.2	29557.3	46400.8	42322.2	39356.9	41930.4	39305.5	52914.8	35777	42029.1
83	fret	0.524755	0.309667	0.470661	0.550997	0.527777	0.542904	0.528784	0.56924	0.517712	0.575334	0.589582	0.547957	0.502651	0.535842	0.466676	0.483634	0.498642	0.512687	0.525762	0.57127	0.543914	0.590601	0.651072	0.62229	0.608978	0.539874	0.557071	0.477642	0.464684	0.482635	0.59264	0.547957	0.526769	0.477642	0.59264	0.580418	0.528784	0.53887	0.644891	0.545935	0.690379	0.644891	0.623315	0.574318	0.631524	0.687266	0.614094	0.633579
84	donor	41761.9	41217.9	38987.9	34020.7	34005.2	40851	46274.6	35416.3	30926.8	27513.6	43296.6	34986.3	35983.5	42883.3	38867.5	59524.4	79967	82488.6	95030.9	81118.6	81807.5	75225	80858.6	79740.3	83223.1	86314.4	74518.8	74319.9	68166.9	84304.6	83506.3	78261.6	70075.6	77182.1	79267.8	79581.3	77973.9	78962	80167.2	83496.7	72465.2	67376.3	83652.5	83076.9	79572.3	79685.6	81303.4	76940.6
84	acceptor	41031.7	31678.9	24780.2	39629.8	47869.3	38035.1	32026.4	38647.5	44259.2	37392.3	36211	46701.7	40586.1	30295.2	45462.7	8462.54	-3013.13	-7212.17	-6906.96	-10578	-6954	-5884.13	-1400.96	-3841.77	-3721.86	-2648.78	-8472.62	-4572.82	-7575.67	-5091.97	-4744.05	-4618.67	-2173.39	-9464.14	-4818.45	-4601.07	-5135.48	-1144.22	-4341.14	525.733	-5007.99	-8606.65	-4596.9	-2626.85	183.689	-5126.19	-2795.14	446.636
84	fret	0.4955	0.4341	0.388136	0.537627	0.584936	0.48232	0.409129	0.52166	0.588839	0.576132	0.455765	0.571228	0.529656	0.414351
85	donor	28265.4	19016.7	15875.5	17003.1	19138.1	16103.9	30699.7	29700.8	31773.7	21550.8	35753.3	26488.8	19541.5	24469.3	18788.3	17247.4	13209.9	21693.9	18045.3	17676.7	14570.2	15840.8	14236.3	16135.7	23325.9	23693.1	34184.9	29339.4	42817.7	49721.7	31266.3	25813.7	19511.1	33897.2	39980.1	34974.2	36158.1	32033.9	31604.6	28625.3	45788.3	42615.4	42875.6	34852.7	22932.7	27522.3	20213.6	31458.6
85	acceptor	55747.2	70904.5	73539.2	72677.1	68987.3	70618.2	48559.3	58180.4	59266	60296	50624.7	62514.7	70645.5	63282.6	72388.3	69355.8	77379.2	59378.8	66077.8	66087.5	62976.9	73989	70403.6	71147.1	57934.9	65259	51659.5	53130.9	36530	43132.9	51375.2	58293.4	67041.6	52558.5	46937.6	49928.7	48598.6	53403.3	53254	58347.8	40000.9	49405.5	51543.8	42450.8	61481.7	62032.7	66515	56035.9
85	fret	0.663946	0.788534	0.822687	0.810725	0.782964	0.81441	0.61268	0.662024	0.651438	0.737149	0.586283	0.70216	0.782964	0.721125	0.794095	0.800571	0.853783	0.732441	0.78575	0.788534	0.812568	0.823606	0.831862	0.815331	0.712598	0.733383	0.601957	0.644686	0.460512	0.464571	0.621437	0.692644	0.774593	0.607806	0.53987	0.588245	0.573504	0.625322	0.627263	0.670663	0.466599	0.536888	0.545828	0.548804	0.72867	0.692644	0.767136	0.640821
86	donor	37575.4	42367.3	46248.6	36131.1	41734.5	39152.6	39386.9	76685.5	72963.6	70739.1	65123.7	73270.3	68314.2	65273.4	62196.4	70178.8	59718.4	78303.7	71545.8	44065.2	67075.2	72173.8	63157.7	64454.7	62331.7	68959.1	66193.6	61382.5	60926	63942.6	76774.8	75973	80269.7	65558.4	74212.3	65531.9	73523.9	65469.1	58242.7	65490.8	76907.7	62111.9	72794.5	67365	65751.7	61290.7	53305.9	69393.8
86	acceptor	23468.6	21778.2	20010.8	25541.5	29673.5	26547.9	26813.7	861.712	-3256.91	-1922.89	-2209.5	3500.82	-4429.81	2695.95	810.774	-2953.79	-1294.9	-227.531	1186.08	1374.66	-1024.81	4298.53	101.003	-7168.76	-3082.47	-3681.79	-3756.11	-3687.82	433.084	-7870.86	776.526	2141.17	2777.57	-955.443	-3609.74	7564.81	3653.51	-1808.37	4918.95	3751.61	5570.01	-4627.26	-1486.63	775.945	-12527.1	4325.32	2183.57	153.372
86	fret	0.384287	0.339943	0.301877	0.414519	0.415499	0.403759
87	donor	38471	28538.9	32372.4	42093.1	37443.2	24330.3	32227.1	21390.4	22522.9	16525.4	12579.8	23440.4	35612	24324.8	29116.2	33883.7	30324.2	39392.2	52293.7	19454.3	30941.9	32548.9	30645.9	32995.7	37726.4	44247.9	32743.8	28401	25063.9	26954	20314.8	27590.2	30351.7	26891.5	20390.2	18711.5	22741.7	25996.1	20763.4	37301.7	23593	37182.2	73520.4	81818.1	58596.4	60449.8	63454	66695.5
87	acceptor	36035.4	36290.6	31996.3	30219.8	23397.2	35097.1	29894.7	38977	34895.4	38535.5	46127.8	29573.8	30574.4	35824.7	30527.1	29444	22668.4	33683.8	30445.3	36148.4	32689.5	38115.2	30147.1	25352.2	27507.9	39194	30254.5	28865.5	17820.9	33784.6	45072.3	34613	26758.5	28065	39750.8	25905.4	27273.9	28624.4	45606.8	32295.2	27308.1	7787.02	-9172.63	-4773.75	-1348.49	-3806.57	730.717	-552.121
87	fret	0.483555	0.55937	0.496679	0.418169	0.384314	0.590891	0.481543	0.64554	0.607893	0.699401	0.785595	0.558327	0.461531	0.595129	0.511911	0.464521	0.427945	0.460536	0.368069	0.649903	0.513952	0.539644	0.495666	0.434816	0.422074	0.469513	0.480538	0.503767	0.415245	0.556243	0.689412	0.556243	0.468514	0.510891	0.660806	0.580332	0.544817	0.524199	0.687198	0.464521
88	donor	33442.8	28526	30395.4	39941.5	38832.1	42576.9	35357	26318.3	36720	36096.2	29203.5	27434.6	30882.9	36324	41685.5	43392.7	40783.1	47576.3	36651.3	34071.6	29534.8	40295.6	27688.3	30778.5	30596.4	44093.2	24723.5	27418.7	25508.5	44205.6	30017.4	41647.7	32344.4	42672.4	33150.3	39878.8	35528.1	31116.7	34111.4	25683.6	43860.4	44502.1	32680.7	32224	34348.1	37994.4	43063.4	42077.5
88	acceptor	49046.2	51244.6	48080.9	38712.4	46017.6	44841.1	38085.5	48943.5	42444.5	47203.4	51523.8	46206.4	54660.3	48607.9	39533.3	42442.5	47240.7	39018.7	42335.9	48868.8	50997.6	46859.3	53876.5	45410.7	47420.1	39834	48995.3	55430.2	43386.3	46308.2	51515.6	40227.8	50597.7	33791.9	47498.4	44460.3	45291.5	44895.7	45437.8	51020	34907.6	36190.3	43787.1	48076	51294	43548.1	45634.8	34314.9
88	fret	0.594783	0.64244	0.613049	0.492281	0.542788	0.512658	0.518725	0.649944	0.535804	0.566526	0.638694	0.627334	0.638694	0.57241	0.48715	0.494329	0.536803	0.450815	0.535804	0.588974	0.633032	0.537802	0.660207	0.595749	0.608261	0.474775	0.664852	0.669484	0.630176	0.511644	0.632086	0.491256	0.610178	0.442406	0.588974	0.526783	0.560621	0.590913	0.571431	0.664852	0.443459	0.448716	0.57241	0.598645	0.598645	0.533803	0.514682	0.448716
89	donor	48700.3	51083.1	34236.3	55806.9	62472.7	58005.4	65184.2	68874.3	76393.2	47727.4	46946.4	51294	75342.4	49393.8	39216.6	44690.9	19202.2	29436.4	49912.6	39678.3	22103.7	21195.4	35439.1	13526.4	16397.5	9536.06	23705.6	26179.6	42479.2	21007.3	12348.3	15014.2	80085.2	107138	97853.7	100411	111778	95672.3	88864	105108	108413	112407	114094	112660	94366.9	100402	88411.8	94743.1
89	acceptor	53499.8	40953.3	62283.9	34520.7	46091.9	44965.9	55507.3	33945.1	30822.6	43511.8	45070.2	65664	47360.1	54949.1	59460.8	63149.8	79782.4	69054.2	58918.7	52723.1	58963	75269.8	53904.6	85144.9	82585.4	88081.5	82570.3	74389.5	74001.3	69008.2	98245.2	111060	20967.2	-5338.2	-3934.03	-1906.73	1741.02	-3669.39	-2020.42	1402.45	-7243.25	3133.37	-1482.39	-706.944	-2458.4	-6156.43	2528.71	3239.85
89	fret	0.523234	0.445187	0.64577	0.382441	0.424472	0.436294	0.46006	0.33038	0.287598	0.476994	0.49	0.561901	0.386329	0.526271	0.603068	0.585513	0.806499	0.700677	0.541497	0.570096	0.727378	0.780295	0.603068	0.862818	0.833997	0.901977	0.777032	0.73919	0.635307	0.76618	0.888504	0.880667
90	donor	20085.1	35807.9	18457.8	16316.8	12554.7	18563	23599.7	22455	32070.6	27299.9	31043.5	9776.49	37070.2	6985.86	9046.35	29502.7	15302.1	12028.8	35294.4	25740.6	36296.8	50021	46537.3	39984.6	37447.7	19553	22708.7	38004.6	26749.2	34013.5	38969.8	44755.3	65205.5	42156.5	49433.2	56326.2	41958.5	57984.5	43814.8	58417.6	47774.9	47279.9	34762.2	47385	43994.2	46122.8	40690	55546.6
90	acceptor	23991.4	22157.7	31224.6	27255.1	27937.1	32602.7	23222.5	34195	27641.6	22809.5	18985.3	25160.4	24570.9	29162.7	38393.1	14610.9	36864.3	39921.8	27027.7	24022.8	-4401.52	241.768	1604.77	291.416	7193.07	-10381.4	17566.1	2474.01	3925.06	-6510.06	6242.18	5904.17	542.148	405.541	5365.97	-13673.1	1822.3	-1166.4	1512.66	-5079.35	7857.47	-4335.17	-5565.36	6238.54	-7121.07	7283.41	5662.13	-11896.8
90	fret	0.544498	0.382373	0.628559	0.625403	0.690254	0.636993	0.495801	0.603401	0.462791	0.454845	0.379474	0.720501	0.39886	0.806395	0.809748	0.331581	0.70642
91	donor	34770.6	65210.4	43919.3	66919.7	72649.8	50721.1	44946.7	63846.5	61136.4	54618	46726.9	78344.5	50402.3	60968.1	90353.9	63359.3	73562	74483.1	29182.1	32033.9	67459.9	46000.6	16605.9	8183.4	-8130.26	-6208.4	-22229.8	-841.366	-21477	5375.89	12186.5	602.242	-5189.9	2639.23	-17969.8	1071.63	8174.54	-21229	-16225.1	-16942.5	-30714.3	4995.06	7616.58	-478.25	-2045.85	10123	-4454.82	-814.797
91	acceptor	21016.9	26584.7	26285.1	25448.6	11258.9	19149.8	16568	16252.6	23883.3	27076.5	18299.5	21504.5	18967.2	27370.8	22755	21095.1	28929.2	23883.3	18113.6	25320.1	18052.6	27626.9	8893.29	-368.273	154.82	-1727.96	8242.28	15115.7	-2005.11	-1012.66	-3855.07	270.826	-3022.18	6978.47	13408.2	589.728	5183	-356.969	-279.137	2827.18	11106.5	245.25	219.674	2712.51	8173.66	10618.3	26008.6	-8959.79
91	fret	0.376281	0.289751	0.374352	0.275132	0.134154	0.274332	0.269557	0.202907	0.280768	0.331739	0.281579	0.215533	0.273533	0.309903	0.200834	0.250129	0.28239	0.242563	0.383084	0.441686
92	donor	40033.6	42058.7	33893.1	37743.9	30932	38884.7	26428.9	28692.7	42398.4	54263.3	51940.8	55170.8	42372.5	30484.4	41271.3	44262.4	34932.9	51775.7	50696.4	47813	49221.3	44408.4	44987	55150.3	47884	49636.1	56217.4	50514.9	41076.2	40668.2	42855.6	45953.1	35627.5	44738.7	38308.8	40826.5	36124.2	32060.5	36010.9	32549	37370	31409.6	40531.7	42739.6	30735.5	39167.1	38299.3	40687.3
92	acceptor	46968.3	43274	48783.8	50759	47574	37648.1	55001.7	50887.9	46294.6	45874.5	45671.3	42799.2	43585.8	49288.4	35670.8	47401.4	46485.3	28388.7	43844	34276.1	36480.3	41448.4	41366.6	43196.5	38851.8	47705.2	50133.4	44787.4	37890	44643.2	44200.4	48016	46515.2	49929.9	45272.3	54021.1	56323.8	55968.1	56795.6	57813.1	55072	46918.1	55664	38891.7	56185.1	59514.3	57281	59194
92	fret	0.539783	0.506842	0.590233	0.573273	0.606265	0.491609	0.675034	0.639793	0.522221	0.458484	0.467462	0.436714	0.506842	0.618104	0.463467	0.517086	0.571163	0.353922	0.463467	0.417135	0.42592	0.482519	0.479498	0.439668	0.447568	0.489585	0.471466	0.469463	0.479498	0.52325	0.507862	0.510941	0.565898	0.52737	0.54186	0.569055	0.609487	0.635433	0.611638	0.639793	0.595562	0.598767	0.578557	0.476482	0.646368	0.603048	0.598767	0.592363
93	donor	15166.7	10690.8	14747.8	15193.2	11099.6	16608.5	13804.2	17903.9	17279.6	9653.7	21090.5	12852.5	15909	19679.2	16517	20677.7	21424	14910.5	17328.4	14296.3	11898.8	9043.63	17891.7	16600.4	16708.2	13035.5	12913.5	14760	11709.6	14961.3	18989.8	14863.7	16488.5	18798.7	15258.2	20494.7	18617.7	15740.2	15813.4	18229.3	22987.8	18282.1	19874.4	20220.1	16094	13812.4	18471.3	19305
93	acceptor	43595.5	40345	44750.4	37551.8	38775.2	40399.2	37823.5	37452.6	36374.7	43472.9	51132.2	40299.1	37807.6	33166.6	37809.9	42567.6	37660.1	31686.2	38469	38149.4	33992.3	33040.4	36884.5	38426.2	37096.1	37351	30261.7	36883	30366.6	39356.1	40938.2	46559	34219.5	34712.3	35744.9	34428.6	36910.3	46258.6	33255.7	37166.1	34063.6	36462.5	46562.2	39324.9	36548.9	44516.2	44152.2	41548.2
93	fret	0.742144	0.790792	0.751893	0.711855	0.777196	0.708922	0.732384	0.676559	0.677541	0.817926	0.707943	0.757738	0.704027	0.627317	0.696184	0.672629	0.637186	0.680487	0.68932	0.7275	0.741168	0.784967	0.673612	0.698144	0.68932	0.741168	0.701088	0.713812	0.721636	0.724569	0.683432	0.757738	0.674594	0.649015	0.701088	0.627317	0.664764	0.746045	0.677541	0.670664	0.596659	0.665748	0.701088	0.66083	0.694224	0.76358	0.705006	0.682451
94	donor	31678.4	25949.4	29611.8	25613.7	26861.5	28991.4	35189.7	19916.3	31704.8	38270.4	28627.6	39273.8	26234.1	49652.9	31258.4	15067.7	27490.6	20840.7	26221.8	13711	19053.5	18819.7	15382.3	14466.7	14600.3	2571.04	17691.5	22271.2	28107.5	13029.2	22954.8	16958.7	22142.9	12733.9	20679	14305	10338.6	4172.01	23048	11433.5	9742.89	17405	12614.4	11971.2	19100.9	8665.62	18953.3	16120.4
94	acceptor	41163.3	45477.4	25832.1	36113.3	31711	30638.2	18991.3	22566.3	32148.9	28792.4	27747.1	23499.1	40663.6	31558.3	9521.43	25505.5	21564	40257.3	22032.6	23423.1	22601.1	25007.3	13313.2	14485.1	20549.2	25789.7	29731	24462.3	15215.4	31517.5	15980.9	22047.4	28574.4	26147.2	40887.3	20780.3	21483.6	20046.4	19997.8	24164.1	31980.6	14495.6	20122.3	24507.5	24970.7	23869.3	16933.7	29490
94	fret	0.565123	0.636959	0.465821	0.584736	0.541392	0.513432	0.350954	0.531441	0.503373	0.429803	0.492265	0.374323	0.608076	0.389097	0.23324	0.628328	0.439112	0.658885	0.456606	0.631208	0.542386	0.571023	0.463776	0.500348	0.584736	0.908983	0.627367	0.523452	0.350954	0.707774	0.410046	0.565123	0.563154	0.67214	0.664574	0.592539	0.674971	0.827785	0.464799	0.678742	0.766679	0.454562	0.614856	0.67214	0.566108	0.733728	0.471947	0.646515
95	donor	43074.2	47951.9	33388.2	55201.2	35797.6	42518.2	45690	51382.8	38887.2	42945.7	47189.5	27849.1	46452.4	29574	42560.3	37092.8	36246.2	41441.9	43147.9	23453.7	54586.2	48019.3	41983.2	35479.5	50868.9	33017.5	56559.6	46347.1	53406.8	48663.8	64234.3	64466	58442.5	55637.1	46397.6	45331.9	29889.9	13496	43870.3	42709.8	42792	37581.4	44580.1	48427.9	29553	36924.3	41465.1	38327
95	acceptor	16021.4	25323.9	26254.3	33330.6	33861.6	35681.2	26937	29134.7	34606.1	13089.6	17441	31850.4	19170.5	14540.3	25260.6	14507.5	11055.9	21499.8	34706.2	13089.2	27646.1	34172.8	27808.7	21216.9	27012.2	29659.8	29068.4	27726	28923.9	18883.6	19243.6	25425.7	17327.6	39246.4	20421.4	20613.7	20895.2	10971.2	13045.3	20866.7	14839.4	23677.5	21555.7	38598.5	10084.2	19885.1	17384.9	33833.1
95	fret	0.270979	0.345363	0.439938	0.376425	0.486476	0.456181	0.371267	0.361957	0.471355	0.233851	0.269922	0.533522	0.292057	0.329751	0.3723	0.28153	0.233851	0.341206	0.446036	0.357814	0.336003	0.41546	0.39804	0.374365	0.346402	0.473374	0.339125	0.374365	0.351593	0.279422	0.230655	0.282584	0.228522	0.413414	0.305709	0.313038	0.411367	0.448067	0.229588	0.328708	0.257224	0.386731	0.325579	0.444004	0.254044	0.349518	0.295211	0.469335
96	donor	29353.8	37114.1	29323.4	32420.2	35279.9	49918.9	33056.6	52310.4	33798.4	44173.1	43526.6	51813.9	49019	46157.3	41704.6	30916.4	39540	40861.5	54941.1	48281.3	75338	93294.7	82745.6	92583.3	92127.3	59294.5	92129.3	81118.2	83005.1	87737.4	84660.9	79590	84144.1	74121.9	83151	68260.7	98057.5	58647.9	85970.1	89843.2	85587.1	73471.4	67433.8	76120.3	98517.6	89338.6	100599	73351.8
96	acceptor	46204.3	34091.7	41115	53065.6	60671	31639.3	38798.9	47240.5	36252.6	22101.9	32945.6	37590.7	39629.5	43555	46824.3	57110.9	51769.6	43310.4	40047.7	33136.2	-3008.69	-7973.75	5364.21	-505.522	-11152.4	-2070.72	1443.32	-4343.83	-598.969	4353.74	271.776	-6509.26	-2793.93	2866.93	-2487.67	3569.35	2902.26	3075.32	3142.6	7321.49	2144.46	453.65	7695.99	7786.25	6743.49	-3514.87	18.158	-5352.57
96	fret	0.611832	0.478711	0.583832	0.620434	0.631857	0.387974	0.539512	0.474599	0.51745	0.333168	0.430719	0.420122	0.447551	0.485908	0.528514	0.648814	0.567215	0.51442	0.421185
97	donor	24716.9	19841.5	35828.7	25028.1	24294.6	29245.8	22111	30457	21732.4	42827.3	24187	17425.7	27788.9	23233.1	35275.3	24949.1	16456.6	22417.1	27903.3	29906.9	27509.6	25201.4	22684.6	30191.2	29161.6	29190.2	29240.7	27193.3	24001.9	29541.8	24385.5	30598.4	29193.6	25797	26471.6	26084.6	32171.3	92151.7	92599.2	57897.6	84916	89431.4	107121	90425.6	84961.4	90723.4	93051.8	101548
97	acceptor	76620	78389.9	63243.5	72324.9	60537.8	75394	70992.5	76115.3	58518.6	44656.4	63648.2	64961.9	71331.6	78051.9	64550.1	59699.5	66118.2	76333.1	69300.2	67837.5	64190.9	76805.2	75067.8	69659.2	65494.5	55082.3	75362.9	81461.7	72700.2	68024.9	72702	68540	67957.9	65893.6	67282.7	72230.5	60043.1	-5691.78	332.814	-4063.64	-1109.94	5611.33	-4138.36	1184.65	4654.24	-1072.91	1035.17	4716.94
97	fret	0.756085	0.798458	0.638344	0.742981	0.713768	0.720817	0.762134	0.713768	0.728875	0.510034	0.724845	0.788364	0.71981	0.770203	0.64638	0.705714	0.800477	0.773229	0.712761	0.693636	0.699675	0.75306	0.768185	0.697662	0.691624	0.653414	0.720817	0.750036	0.752052	0.697662	0.749028	0.691624	0.699675	0.718803	0.717796	0.734919
98	donor	234263	239071	194686	231587	200718	185561	218409	173319	190150	159401	166823	177433	199366	192884	204141	159073	176931	204537	177737	229916	347324	349668	341266	339351	325442	341079	254090	198199	60595.1	-755.437	-3193.26	-2993.71	-4076.35	-7237.93	-2883.5	1397.94	-4116.56	3131.37	1232.64	-1299	-5218.57	1633.24	2648.87	-310.167	-2062.95	505.915	-216.346	4155.94
98	acceptor	63017.5	68243.7	85966.4	81317.4	79986.9	87924.1	78194.6	104899	100301	108138	94332.7	102898	99754.2	103724	101404	106843	101134	95659.5	102019	80719.8	-3432.02	-8481.13	-2514.81	-3469.77	-5529.02	-3207.88	-5174.63	-100.658	670.762	-4468.9	-1403.42	-460.8	1762.09	-4970.79	-25.503	-1246.47	1901	611.532	1782.78	1379.24	-1013.78	6031.82	-841.535	2826.06	-613.641	483.656	-2842.85	-3967.09
98	fret	0.212052	0.222025	0.30652	0.260173	0.284862	0.321179	0.263292	0.377309	0.345318	0.404078	0.361052	0.366756	0.333561	0.349908	0.331775	0.402052	0.363881	0.318563	0.364827	0.260173
99	donor	3784	6779.13	2328.9	2759.59	4394.03	3082.95	8230.15	5199.03	4525.14	4777.17	6780.49	5175.93	5677.27	3125.74	4231.68	-2035.73	-2118.61	-2033.69	-2056.11	-3072.37	-3331.87	-2319.01	-2274.17	-1013.35	-789.857	-2191.97	-1956.93	-2939.23	1342.53	-3900.46	-1888.32	831.68	-1148.54	832.359	-685.241	-149.258	1503.53	96.6559	-1211.04	-2066.98	-162.844	-1552.05	-992.294	-609.158	-585.381	-308.219	-1056.15	1225.69
99	acceptor	8332.03	3893.88	6649.99	5637.76	4845.3	7805.96	3835.72	6865.47	6623.66	8499.98	3454.62	6278.33	6664.24	4677.71	5777.31	1160.61	773.555	-84.01	-6477.56	1651.55	1777.77	-1180.61	5081.05	925.648	-919.053	1494.25	-2105.56	3328.21	2549.73	-563.552	1232.83	-1112.43	-2113	-1687.28	4823.26	-835.423	-2706.93	-190.62	1892.47	-1215.77	936.215	-395.752	1218.21	-1597.47	-1843.75	-123.586	1264.2	1298.74
99	fret	0.688076	0.365186	0.740305	0.671028	0.52398	0.717098	0.318053	0.569127	0.594467	0.639884	0.337108	0.548266	0.540224
100	donor	22923.9	24481.3	25057.7	25836.4	26484.4	21943	36574.4	29593.7	25042.6	23593.9	21652.7	20830	25337	28790.2	28176.6	29366.7	23903.5	26927.4	22009	25525.5	19352.4	21711.8	33535.3	24525.3	26013.9	25592.9	26473.4	31320.3	27442	24650.5	23254.1	20177.9	23825	22648.7	15597.9	25452.6	18145.8	22153.5	25771.8	19445.9	26348.2	22694.2	20468.1	25332.9	20494.3	24499.2	23818.2	26261.5
100	acceptor	73114.5	58298.2	68361.8	59910.7	57785.2	67110.4	61092	61832.9	65193	67551.7	67368.1	63484.9	55475.5	66882.3	53555.4	57332.3	63476.6	60519.2	61202.1	54836.4	64413.5	69110.3	49031.6	60519.5	57740.9	58137	64903.2	55015.3	57500.1	53585.1	63240	59692.2	63111.7	59544.5	66343.6	60433.7	68878.9	63866.1	68074.2	63867.2	65152.6	61196.2	58587	60936.2	56963.4	61521.7	61174.5	52038.3
100	fret	0.761449	0.704169	0.731942	0.698402	0.685883	0.753852	0.625716	0.676231	0.722383	0.74148	0.756702	0.752901	0.686847	0.699364	0.654925	0.661715	0.726209	0.691665	0.735759	0.682024	0.769034	0.7605	0.593384	0.711854	0.689739	0.694554	0.709936	0.637422	0.677197	0.684919	0.730987	0.747194	0.726209	0.724296	0.809591	0.703208	0.791714	0.742433	0.725253	0.766191	0.711854	0.729076	0.74148	0.706089	0.735759	0.71473	0.719519	0.664621
101	donor	39993.6	37978.9	41974.9	42858.6	29476.2	30410.9	29179.7	57008.7	44239	29409.5	45107	34782.1	37195.4	38226.3	37619.5	42526.7	41480.1	47655.8	30299	29376.1	39082.5	28345.2	38320.6	35544	37244.5	34666.2	24620.1	16133.1	21664.8	35078.6	60568.9	46090.8	37169.9	33415.3	36545.4	47960.2	47954.3	35155.1	27168.9	32692.7	34874.3	47078.5	36948	43312.2	45491.9	23817	44260.6	24944.1
101	acceptor	25585.3	32380.7	38031.4	29946.1	39041.7	52026.7	41865.5	24964.8	37028.9	50242.1	33416.8	35411.4	36614.1	39058.1	36784.4	26561	38982.6	33435.7	40929.3	37739.2	39886.4	39722.8	47469.3	32507.9	34831.9	35225.7	48012.4	53602.2	57142.6	38896	29540.3	34045.3	38122	47521	36728.9	28977.5	29388	40617.3	42517.1	34292.3	33135.4	42104.2	33563.6	26667.4	31342.3	44237.2	26483.4	40587.3
101	fret	0.390025	0.460634	0.475587	0.411398	0.570235	0.631007	0.588949	0.304388	0.455668	0.631007	0.42509	0.50474	0.495658	0.505751	0.494651	0.384227	0.4846	0.412373	0.574383	0.56196	0.50474	0.583738	0.55371	0.477588	0.483597	0.50373	0.660841	0.769016	0.724796	0.526043	0.327895	0.42509	0.506763	0.586863	0.501709	0.376516	0.380369	0.536263	0.609896	0.511826	0.487611	0.47259	0.475587	0.381333	0.407499	0.650136	0.374592	0.619376
102	donor	15049.5	25628.1	14123.1	13805.9	16976.5	21256.2	19013	20420.1	39533	47287	50700.8	44802.6	52712.3	48636.4	37748.3	43818.5	51969.4	48355.8	57008.4	42090.5	56250.1	40006.9	52342.3	44610.4	43409.1	54307.7	44463.4	50256.8	51527.3	50761.3	49572.5	46369.2	57278.4	54313.5	55044.9	52835.3	44061.7	52686.4	43908.8	46894.9	49027.5	59172.7	48770.9	46145.3	49508.1	45358.1	45108.3	62645.1
102	acceptor	28202.2	24417.3	32697	33508.5	26746.2	28829	28088.5	34734.5	18603.7	4039.94	-427.042	-2064.65	-3587.99	890.805	-3693.37	-1988.66	5494.56	3284.75	-1431.02	4034.62	-6861.14	1883.31	-3930.93	5932.11	1756.96	1083.92	-3646.13	-1495.97	-7545.02	1614.49	4761.99	3159.85	2000.21	-3160.69	1922.63	1171.08	3889.18	2378.32	-2265.47	817.242	5155.79	-4811.35	-652.524	-1723.48	2290.9	2281.49	-3106.16	-2595.47
102	fret	0.652138	0.488252	0.698058	0.708037	0.612191	0.575225	0.596207	0.630169
103	donor	40123.1	43696.2	33226.3	46254.1	33847.7	40892	32394.6	42932	44586	35862.6	41675	30387.6	33634.3	40447.9	37935.6	29919.9	27114.2	22511.6	22152.2	25538.6	35743.4	47394.9	30933.7	33813.2	31012.1	33828.9	39691.5	49817.8	23016.9	38500.5	45673.4	31925.4	33854	51385.4	40135.6	34671.6	26362.5	29522.9	32051	43840.6	37394.2	26546.1	35898.7	32625.3	28895.2	30279.3	27704.2	21339.4
103	acceptor	61296	54556	67068.4	61199.4	69508.7	70707.1	73279.1	60252.9	63977.9	68261.8	70213.8	70152	76485.7	68186.3	78523.7	66650.4	79102.7	82952.3	81005.9	66983	76431.3	68934.1	63597.6	62569.4	76565.7	76720.1	71726.4	71983.4	71298.4	67150.2	72090.3	80046.3	83001.4	59167.9	68966.2	87079.1	83160.1	74488.6	74685.1	67344.5	67344.6	72021.3	62122.7	73483.8	79789.3	79135.6	76918.8	81667.9
103	fret	0.604664	0.555335	0.668365	0.569411	0.67242	0.633947	0.693731	0.583501	0.589544	0.655194	0.627883	0.697794	0.694746	0.627883	0.674448	0.689666	0.744613	0.786488	0.785465	0.724236	0.681546	0.592566	0.67242	0.64912	0.712025	0.693731	0.64406	0.590551	0.755835	0.635969	0.611726	0.715077	0.709991	0.535258	0.631926	0.715077	0.758897	0.716094	0.699826	0.605673	0.643049	0.730346	0.633947	0.692715	0.734421	0.723218	0.73544	0.792627
104	donor	1882.56	4562.3	9510.48	9762.83	10521.3	8512.2	13169	8079.98	3103.92	9018.31	11331.4	19231.1	20697.9	20608.7	23568.6	28179.4	26541.2	24056.6	30235.9	21400.6	25248.7	29124.7	25562.4	29964	31040.4	31680.4	38880.2	33050.9	37308.9	28125	33964.1	29848.3	33265.6	28880.7	40966	35627.5	33198.7	31090.6	25156.7	25410.4	30295.9	29345	32586.6	31356.9	35140.9	38220.8	37753.7	26827
104	acceptor	35326	27900.6	25568.1	22927	22895.7	23979.7	24069.9	39225.9	20663.8	21746.3	31639.7	16267	19799.1	17695.8	10554.7	12081.9	9414.99	3973.29	-2873.63	7391.66	931.907	3203.79	928.697	-1557.08	6155.22	3790.27	5906.44	13645.7	-1105.34	4875.4	4242.19	4428.65	-221.096	-52.044	227.245	-2942.77	2272.69	-750.909	511.103	11008.8	2828.08	6038.03	-730.931	-1802.78	-474.537	-2561.56	1770.6	7660.53
104	fret	0.949033	0.859512	0.728524	0.701436	0.684977	0.738351	0.645957	0.829399	0.869429	0.706888	0.736568	0.457931	0.488944	0.462096	0.309394	0.300352	0.261444	0.142334	-0.105223	0.256815	0.035226	0.0989107	0.035226	-0.054655	0.165521	0.106421	0.132491	0.292405	-0.0304846	0.147238	0.111416	0.128787	-0.00658935	-0.00131621	0.00525652	-0.0900634	0.0634912	-0.0251509	0.0196438	0.302616	0.0850691	0.170369	-0.0224892	-0.0614185	-0.0131996	-0.0722853	0.0442616	0.221746
105	donor	43953.8	36183.5	39723.9	43329.8	38200.9	54818.7	46234.1	39800.3	45332.7	39652.4	31590.1	42291.4	38448	51006.9	32211.7	38646.8	39777.2	37351.5	36121.7	33603.8	42833	40361.3	30019.8	29445.4	33915.2	37748.9	35632.2	33357.9	22780.1	35812.7	28100.5	33968.6	42325.3	50301.7	44105.3	48395.7	41154.9	46686.1	31293.2	40589	45830.7	34859.1	34026.7	33591.7	35454	35681.8	37951.3	39624.6
105	acceptor	45333.9	56500.2	39580	41005.5	42144.6	38009.3	32628.2	48799.9	37526.9	41750.1	40119.1	41481.4	40419.2	38974.4	53835.6	41919.2	34033.2	44004.4	44717.5	48790.1	38178.9	46184.3	43844.5	49519.8	40485.6	36409.7	47656.2	44116	58646.3	38300	52032	46379.7	36418.8	39812.1	41780.6	35423.7	37402.5	41218.4	49300.9	39425.7	37256.1	42195	45554	49294.8	44726.6	44450.2	48619.3	45352
105	fret	0.507887	0.609527	0.49871	0.486397	0.524081	0.409554	0.413865	0.551065	0.453128	0.512964	0.558978	0.49564	0.512964	0.43307	0.625726	0.520047	0.461506	0.541121	0.553046	0.592201	0.470882	0.534125	0.593168	0.626674	0.54411	0.490511	0.571759	0.569799	0.720597	0.517015	0.649263	0.577625	0.46255	0.441544	0.486397	0.42242	0.476069	0.468803	0.611441	0.492565	0.448925	0.548087	0.572738	0.595101	0.557991	0.555026	0.561936	0.534125
106	donor	52266.2	49875.5	49425.4	46182.5	51728.2	56800.7	52161.6	54845.4	40904.8	48759.6	48803.6	52940.3	51678	47562.1	44147.7	55061	46689.2	41612.4	42583.8	46860.8	44679.4	52867.1	41700.4	53024.1	67647.1	78324	71997.4	94737	88990.3	82869	72973	83597.5	83019.7	91052.4	93968.7	98526.2	91314.1	83151.6	92840.3	96112.4	100628	86538.9	89815.2	92482.3	91358.1	90179.5	87882.9	90861.9
106	acceptor	44747.9	33388.7	27491.7	41965	40564.4	24159.5	38753.6	38950.2	39328.5	41718.6	49373.2	46141.4	39492.2	37738.6	39099.5	37674.8	39837.8	46622.5	44806.3	38845	44347.9	51825.3	42078.9	40289.2	-1694.73	5707.4	6339.63	-3334.93	1023.52	-3296	2649.04	-1620.42	1252.91	1364.2	-1837.58	3718.22	1853.25	1122.01	-728.903	5222.74	7178.95	-157.025	-1261.82	645.903	2517.55	-3123.82	-4463.39	282.448
106	fret	0.460975	0.400933	0.357379	0.47592	0.439186	0.298372	0.426382	0.41559	0.489933	0.460975	0.503002	0.465949	0.43327	0.442148	0.469933	0.405811	0.459982	0.528281	0.513093	0.453034	0.497969	0.494953	0.501995
107	donor	104293	95055.1	89321.6	132570	181910	173523	151709	171476	165277	161659	57451.1	12512.1	14510.3	16182.3	17239.8	11495.4	2306.4	1808.89	6933.5	9217.15	10791.2	16818.4	11859.7	8173.2	2768.57	3836.99	4176.81	1338.57	-501.945	3725.52	400.639	2246.59	-1496.96	-3226.01	6185.88	-3163.48	609.975	-2323.43	6843.79	5587.78	4606.36	-733.03	-11101.9	-1083.73	5283.3	2583.7	8697.89	-1192.48
107	acceptor	46684.6	43834.2	46620.9	16650.1	2285.84	6184.81	428.359	-917.89	-1233.08	3183.73	687.431	2851.64	2333.48	4409.75	3795.24	1566.61	607.75	1778.3	4745.82	2794.53	4078.4	2132.05	3073.46	3967.91	3316.24	-3753.86	-904.646	-2743	4157.61	4119.43	3105.75	-2223.24	412.977	-1363.77	-815.164	-3777.51	-2575.39	887.03	-2122.98	3711.64	-3242.23	-1251.61	-993.211	-1905.52	-3131.08	1213.53	-4487.55	-1179.87
107	fret	0.309009	0.315902	0.343304
108	donor	31634.7	29227.6	20034	28522.6	25443.4	38166	34861.1	50011.3	47506	41385.3	34280.1	44990.1	47426.6	46107.5	36449.7	25733.5	22790.9	28436.9	32350.5	34716.5	28683.2	21614.6	27657.7	28803.7	41246.9	23200.6	40431.2	29780.1	21929.7	31077.8	31712.4	26200.3	29764	25819.2	27342.7	30534.3	26289.5	31677.5	28792.1	25182.8	40419.6	32604.9	30412	-3072.83	-7252.41	-1560.04	-2771.17	-1337.81
108	acceptor	66535.4	66094.3	62846.1	52094.3	56625.4	51743.7	52306.4	44170.2	46839.8	40352.4	45627.3	33841.8	49614.3	44357.9	56306.5	68838.6	57961.9	70883.8	63509.8	65280.9	57001.1	62672.1	56279.9	49705.5	46537.5	65269.8	45174.8	51379.8	53152.6	53945	53816.1	61398.9	66554.7	63839.3	67451.7	60552.9	56832.9	71947.2	58598.9	59854.5	49351.4	52856.1	1689.62	-1826.94	-257.328	346.077	3188.57	4295.25
108	fret	0.678272	0.693302	0.758588	0.646318	0.690075	0.575147	0.600069	0.468556	0.496597	0.49358	0.571013	0.428966	0.511733	0.490565	0.607379	0.727944	0.71816	0.713822	0.662252	0.652669	0.665449	0.743227	0.670785	0.633632	0.529992	0.73776	0.527956	0.632578	0.708408	0.634687	0.629416	0.700846	0.69115	0.711656	0.711656	0.664383	0.683631	0.694378	0.670785	0.704084	0.54941
109	donor	46875.8	48132.7	39487.7	48381.9	36810.9	40168.7	48098.2	36136.7	48655.1	47756	47378.4	43761.9	45552.5	35748.8	39567	36447.1	44057.6	37629.8	37985.9	43907.6	36936.7	38188.5	36735	34702.2	46493	42294.6	37369.5	40804.9	57324.3	106934	100420	99576.3	100969	103873	107443	101007	89115.7	109009	112523	17613.8	-7.36734	-1581.55	-967.738	-2904	-890.15	-2574.68	-2645.37	-1462.58
109	acceptor	62633.7	61927.3	64003.5	57172.8	56484.1	49541.8	55224.5	70582.4	58253.4	57266.5	61986.3	58519.4	63270.1	67394.9	56163.2	61712.7	50550.4	58000.7	54518.3	51969.6	60241.6	61230	60589.9	55925.2	55898.2	63743.3	65421.5	58715.8	44301	2112.68	-1720.94	-5208.22	1219	-3392.16	-4793.98	-442.318	-202.777	259.935	-3971.91	-528.409	-1528.35	2682.69	1487.88	3110.94	135.743	-4.262	-2176.84	-29.121
109	fret	0.571808	0.562964	0.618425	0.541202	0.605883	0.552108	0.534235	0.661261	0.545174	0.545174	0.566898	0.571808	0.581595	0.653702	0.586473	0.628961	0.534235	0.606849	0.589395	0.542196	0.620347	0.61554	0.622267	0.617464	0.546166	0.601046	0.636602	0.590368
110	donor	15142.3	18933.5	16559.4	16496.3	18220.4	14668.1	37949	55949.7	56528.5	48762	58035.1	46797.1	59763.4	54144.9	49852.8	55049.2	58692.8	55307.8	54577.5	56158.6	58347.7	60471.3	64045.1	63022.7	57373.6	58201.9	58416	59332.3	61068.3	58662.7	55336	54682.6	59967.5	54309.8	54843.7	57460.6	50447.8	53609.1	64934.1	53855.3	58575.2	63723.9	60182.6	52290.4	60519.1	50191.6	57345.4	-107.788
110	acceptor	36368.9	36059.1	35424.6	38284.3	36687.5	33583.7	10728.1	-5343.31	-1178.38	-2717.53	-4243.8	-4702.4	-3674.21	-1849.73	-1884.53	-3896.29	-5047.94	-3918.82	1080.03	-5228.11	-3294.01	-4199.08	-2835.76	-4818.15	-3291.08	-3015.55	-5384.26	1689.04	-3854.53	-3316.7	-1166.66	-2836.29	-1158.06	-3058.25	-2901.35	-4628.1	-1669.19	-7482.05	-5208.77	-6160.6	-4058.58	-1323.95	-4373.51	-1916.56	-1093.23	-3939.37	157.152	1260.19
110	fret	0.705707	0.655964	0.681012	0.698426	0.668069
111	donor	27331.4	31093.5	31444.2	42453.7	46681.6	35326.9	34219.9	29159	40837.1	42031.8	50112.2	35699.5	36379.1	33702	38327.2	47142	54394.9	46372	37184.6	31984	31216.8	31981.3	41752.3	35137.8	31055.1	38941	35705	35951.6	24558.5	36411.9	41974.2	32225.1	38387.5	42952.4	27068.4	55373.1	38954.7	43075.7	43459.3	33934.9	29304.3	44327.9	40998.8	51515.1	56937.6	48081.8	48339.4	45717.1
111	acceptor	53416.6	55671.6	51265.8	52243.1	50917.5	65926.6	49739.6	58049.5	42942.3	61903.7	50917.2	59658.6	42167.4	37269.2	56260.3	34744.8	40659.7	40560.9	49048.6	56479.3	52460.9	52944.4	43298.6	40278.3	61572.7	67441.4	54026.6	63868.7	57294.1	59027.9	49775.4	42340.9	59268.5	48703.7	52168.6	39390.7	48438.2	55337	43935.9	55563.2	53514.3	43554.1	52730.6	55222.5	36862.4	43502.6	50756.7	34475.2
111	fret	0.661487	0.641656	0.619845	0.552077	0.52166	0.651042	0.591979	0.665677	0.512582	0.596094	0.503525	0.626064	0.536831	0.524691	0.595065	0.423943	0.427883	0.466513	0.568397	0.638533	0.627102	0.622953	0.50956	0.533791	0.664629	0.634372	0.602276	0.639574	0.700421	0.618809	0.542927	0.567375	0.606403	0.531765	0.658357	0.416075	0.554113	0.562269	0.50252	0.62088	0.645825	0.495492	0.562269	0.517623	0.392569	0.475483	0.512582	0.429855
112	donor	30299	32726.7	35436.9	39478.2	30599	30470	29558.2	21567.5	26059.8	30843.2	30870.1	30960.9	34346	41318.6	33008.5	30859.5	29649.7	25220.1	109959	110542	127733	120077	126203	120002	121386	112167	88313.7	3078.2	3279.21	2646.76	1770.73	5937.98	1977.37	-135.995	2736.93	2012.44	-2292.57	-1287.55	1714.38	1420.07	597.892	-3107.24	316.11	3142.08	1857.15	-1159.8	907.853	3243.52
112	acceptor	72725.1	70319.6	77719.9	79877.8	80095.5	62393.7	78857	77513.5	81041.2	89252.7	90477.1	83486.4	83488.3	87354.5	82564.5	70480.1	87499.7	82867.6	13633.7	-4530.3	-2164.97	-3725.23	-250.896	-6717.02	-2146.47	-4094.02	-4341.79	435.559	-3293.98	-1886.43	-4256.17	-544.977	3758.9	-247.728	-465.881	-2183.74	6404.97	307.334	5090.79	-2236.39	2247.92	11.157	-801.893	1721.77	-4767.42	-1959.21	-1659.05	-4740.25
112	fret	0.706092	0.682663	0.686426	0.66945	0.723757	0.672287	0.727474	0.782384	0.7569	0.743142	0.7459	0.729324	0.708889	0.678895	0.714475	0.695809	0.746818	0.766942
113	donor	39027.3	52323.8	38703.2	61202.9	46282.8	37359.7	38668.6	47623.2	44654.6	44409.1	40858.5	42370.3	37281	36820.1	40704.3	47830.8	46894.8	44269.1	43967.1	56862.5	48277.6	46844.4	44078.8	47003.3	46347.3	42285.3	53005	49185.3	45993.3	51475.9	28452.3	26433.9	49278.2	46525.1	44111.8	48263.4	46331.6	45840.7	62845.3	27314.9	45894.2	40597.3	33028.7	32592.9	53045.9	42969.7	42782.5	45674
113	acceptor	21203.9	24443.1	15030.8	20662.3	28256.6	20751.6	26945.4	35736.3	27457.1	20046.6	20725.2	35616.8	21333.1	24698	21972.3	15160.2	16626.1	22097.1	21296.6	25362.4	11610.9	16332.3	11977.8	19921.8	25526.8	29395.8	16274.6	18314.6	15686.4	19968	22222.4	37075.9	30667.5	13441.1	15856.8	25834	24217.6	9092.22	24545.8	27759	15076.1	30490.9	23248.9	30725.5	23246.2	25720.4	30292.3	18674.7
113	fret	0.352107	0.318566	0.279965	0.252729	0.379118	0.356718	0.410658	0.428235	0.381005	0.311433	0.336571	0.457106	0.364135	0.401008	0.350268	0.241028	0.262014	0.332946	0.326632	0.308788	0.193884	0.258618	0.213946	0.297342	0.354872	0.409689	0.235225	0.27138	0.254411	0.279103	0.438116	0.583634	0.383841	0.224532	0.26456	0.348432	0.342942	0.165658	0.280827	0.504461	0.246862	0.429219	0.413569	0.485712	0.304371	0.374414	0.414541	0.290358
114	donor	46500.1	43205.3	39455.6	29107.4	25951.8	29403.7	20986.6	25280	23654.8	28167.4	29189.6	21642.9	22342.9	24065.1	22961.4	13273.9	30356.3	30683.7	27484.4	21891	27324.4	27162.2	31263.7	33625.2	37103.8	43884.6	44978.7	37961.6	40690.5	38290.4	40666	39009.7	37331.9	33062.3	26024.4	31554.1	34460.8	21386.6	34932.6	43237.2	35814.1	48368.3	22465.1	31696.3	37479.3	44783.1	43994.2	45672.7
114	acceptor	28747.2	33068.6	34316.1	41544.7	47268.5	40710.5	54529.9	40989.5	51784.4	46020.3	46794.6	52508.6	40134.8	55775.9	46276.7	54211.8	46470.8	40633.6	46044.2	52479.9	34917.9	48429.6	44947.9	40570.5	27244.2	22681.4	29981.2	29650.7	25295	35316.8	26083.1	33417.5	37187.4	38890.3	45540.4	40166.4	30609.6	53332.7	37262.8	34130.2	33698.1	33072.8	47048.5	37537.1	33882.2	31763	34203.3	22860.2
114	fret	0.382127	0.433547	0.465367	0.587935	0.645892	0.580848	0.721802	0.618383	0.68683	0.620418	0.61635	0.708411	0.64283	0.698127	0.668381	0.80368	0.605174	0.569725	0.626524	0.705324	0.560637	0.64079	0.589961	0.546517	0.423631	0.340854	0.399886	0.43851	0.383113	0.479331	0.390999	0.461382	0.499325	0.540479	0.636711	0.559628	0.470351	0.713559	0.516361	0.441489	0.484324	0.405815	0.67657	0.542492	0.474341	0.414718	0.437517	0.333995
115	donor	24008.5	18279.8	24036.3	22216.7	26814.1	21472	22259.5	24055.3	21148.1	26404.4	19955.7	25284.2	20312.9	20559.8	27736.6	21747.5	29263.2	24941.3	25123.1	18491.7	16034.7	12517.8	21714.9	25205.6	19034	14146.8	15297.9	18378.2	21102	23035.2	22428.6	16832.5	33267.6	17915.4	15300.3	22951	21352.9	23217.8	20744.8	23421	18926	19801.7	15958.5	16567.4	13203.7	14174.6	13462.5	8276.81
115	acceptor	22756.8	26975.4	18823.8	33915	25042.5	39905.2	39236.4	36855.4	29761.6	28517	27672.9	30840.6	29550	30010.4	29904.1	23477.3	24321.3	25760.8	34783.4	24976.5	36836.7	30093.2	28062.2	24649.8	21486.4	21174.6	29355	33748.2	40993.6	19051.2	32025.8	31128.7	30649.5	29170.9	29494.2	35292.9	32092.4	26290.7	25948.1	37749.8	24251.1	26939.3	30490.3	28857	28785.9	26224.3	30382.8	28403.8
115	fret	0.486266	0.595619	0.438881	0.604328	0.483206	0.650192	0.637867	0.605294	0.584927	0.519647	0.581025	0.549561	0.592708	0.593679	0.518643	0.518643	0.453409	0.508576	0.581025	0.574181	0.696942	0.70617	0.563383	0.494405	0.530663	0.599494	0.657741	0.647354	0.660565	0.452375	0.587848	0.649246	0.47912	0.619739	0.658683	0.606259	0.600462	0.530663	0.555496	0.616846	0.561414	0.576139	0.656799	0.635012	0.685815	0.649246	0.69324	0.774115
116	donor	367.113	10081.4	17992.9	3379.86	8715.44	8640.9	12447.6	4683.42	6720.23	8143.4	11544.4	10982.8	13059.5	11986.5	16533.3	10818.1	7815.78	7160.53	4100.98	9032.67	6623.16	11846.1	8731.04	10592.8	9308.29	9772.85	10012.1	5546.68	13515.4	10535.6	12076.6	8311.55	12721.5	9760.72	4165.12	12577.6	8949.46	15396.2	8266.48	5903.78	8880.12	4556.88	6415.15	11738.6	9082.94	9429.63	8699.84	7320.01
116	acceptor	34274.8	23349.8	34942.8	33358.8	24801.5	35674.3	44429.2	36981.4	32100.4	31483.3	23745.6	27412.4	31888.9	26353	35105.4	31855	41990.5	31729.4	43271	25043.5	36747.2	29677.9	26590.3	35848.4	36604.9	29991.9	29577.7	38568.7	18977.7	30000.6	36361.4	32094.3	37831.6	36495.7	29388.1	25745.7	29376.8	21365.1	26166.4	25644	49391	28507	27316	34941.6	33425.9	41406.8	24461.4	22748.9
116	fret	0.989717	0.69864	0.660315	0.907902	0.73981	0.804907	0.781023	0.887887	0.826716	0.794614	0.672976	0.714273	0.709089	0.687201	0.680099	0.746514	0.842757	0.815872	0.913543	0.734754	0.847292	0.715135	0.753172	0.772075	0.796999	0.754002	0.747348	0.874092	0.584129	0.73981	0.750681	0.794614	0.748182	0.789027	0.875557	0.672079	0.76636	0.581201	0.759788	0.812752	0.847292	0.862255	0.809622	0.748182	0.786623	0.814313	0.737285	0.756486
117	donor	40197.1	39051.4	32666.5	35001.8	33466	28050.7	32473.3	26218.5	26027.8	34288.6	36821.8	14731.9	28547.7	32413.8	38813.2	34328.6	31150.2	21867.6	28279.2	30294.8	26120.1	23383.9	24200.4	33163.5	32737	31746.8	26250.1	31200	32087	39963.8	28186.8	23867.5	28947.4	34508.5	32266.8	27975.4	36666.3	30718.9	33173.2	30082.2	33442.9	23900.3	30492.9	25950	34423.4	33016.4	29848.9	70383.8
117	acceptor	36093.1	28524.6	33532.2	33150.2	27703.6	32889.3	47005.6	38475.3	21498.5	43942.8	41898.6	44031.5	35892.9	38125	42802.1	43541.8	45934.4	43974.6	41740.2	37216.5	46727.1	44841	52179.1	34885.9	35885	44665.5	44428.3	38212.8	50537.3	37022.5	49215.9	36089.7	39954.7	32923.5	37975.5	41334.7	37665.3	39365.3	41658.8	47948.2	38957.2	41067.7	40227.9	42655.4	32785.2	32064.2	34338.3	-3366.69
117	fret	0.473587	0.422064	0.506635	0.486573	0.452699	0.539953	0.590986	0.595096	0.452699	0.561312	0.531849	0.749113	0.557236	0.540967	0.524778	0.559274	0.596125	0.667702	0.596125	0.55113	0.641627	0.657257	0.683441	0.512674	0.522758	0.584829	0.62813	0.550113	0.611579	0.480574	0.635392	0.602299	0.579705	0.488575	0.540967	0.596125	0.506635	0.561312	0.556218	0.614677	0.537925	0.632278	0.568455	0.621915	0.487574
118	donor	108743	127581	109962	112733	132205	143634	132890	112796	117567	124675	114594	114700	133905	148401	127728	126737	128071	109036	116274	122965	119956	110187	114501	115960	123939	121017	114586	111028	127376	114304	115631	138031	125416	125551	116073	114072	134304	132965	125875	132023	115098	104439	118591	110364	129423	115628	89649.2	107652
118	acceptor	26648.9	21142.7	24235.9	29980	34781.5	27381	29606.8	24318.3	27005.1	33368.6	30887.7	27288.7	27799	19823	25045.6	27817.9	21553.5	24023.2	48169.3	35866.8	36239.7	42700.3	35897.6	36437.6	39191.5	26024.8	34429.3	33636.6	33663	38146.8	37087.3	38795.7	39075	45498.8	40754.4	31459	26360.4	24128.9	30463.9	24034	23381.2	30938.9	29778.9	26449	25807.6	40125.3	45059.1	28499.3
118	fret	0.196904	0.142298	0.180317	0.210184	0.207952	0.15999	0.182457	0.177475	0.186758	0.210929	0.212423	0.192537	0.171819	0.117948	0.164143	0.180317	0.144314	0.180317	0.293318	0.226019	0.232151	0.27916	0.238339	0.239116	0.239895	0.176767	0.231381	0.232151	0.208695	0.250095	0.243017	0.219174	0.237562	0.266076	0.259648	0.216172	0.164143	0.15381	0.194717	0.15381	0.169023	0.228312	0.200566	0.193263	0.16623	0.257248	0.334885	0.209439
119	donor	20778.1	23576.3	24619.1	35707.1	25405.8	18629.8	21995.7	21461.9	16549.4	20267	20421.2	23924.9	19941	18184.5	20631	16576.1	24842.2	22825.6	22686.7	23034.3	25014	19065.8	24085.3	22307.3	15889.1	23878.6	22892.4	22552	32370	30460.3	23395.3	19957.4	24670.5	21409.5	20572.4	20619.7	21591.5	22778.3	24563.5	23305.8	19881.3	19047.3	19964.6	17478	22317.6	23740.8	22715.5	22260
119	acceptor	77189.1	64779.1	67861.3	52283.9	59897.6	58828.2	64211.8	78379	75505.1	60951.5	53901.8	64143.2	59371.4	53954.8	53580.7	70113.2	63387.8	67584.3	63757.4	69090.7	65842.4	76359.5	69393.5	62822.2	56065.1	63187.4	64536.8	65086.5	60220.2	46544.7	50381.6	55556.4	63799.3	76173.3	57276.4	68770.8	60557.4	63092.1	54291.6	63678.8	66209.8	65258.9	67429.5	57370.5	69387.3	56332.2	67836.8	68798.8
119	fret	0.787539	0.73279	0.733726	0.59411	0.701751	0.759819	0.744935	0.784778	0.820485	0.750525	0.725304	0.728118	0.748663	0.747731	0.721549	0.808628	0.718719	0.747731	0.737467	0.749594	0.724366	0.800392	0.742137	0.738401	0.779249	0.725304	0.738401	0.74307	0.650302	0.604851	0.682792	0.735597	0.721549	0.780171	0.735597	0.769086	0.737467	0.734662	0.688492	0.731854	0.769086	0.77371	0.771861	0.766309	0.757034	0.703641	0.749594	0.755175
120	donor	37464.3	25947.6	24148.4	20911.6	25313.7	29337.2	44318.9	52042.6	40772.8	28385.5	38338.1	15940.3	17848.3	21327.3	17021.5	22766.4	34153.4	32876.3	37466.6	42859.7	44270.3	37172	37391	40230.6	20770.4	21427.5	17967.8	16780.2	33177.1	39844.2	57994.9	74692.6	61126.8	58468.4	34041.6	1913.36	2558.87	1683.54	1563.23	4167.63	6219.08	1776.85	1648.83	2028.27	6115.73	583.777	1189.18	-976.4
120	acceptor	19601.3	45404.3	44636.5	42048	42241.2	32692	39753.4	33369	41095.6	43239.7	26895.4	43886.1	54748.2	45619.3	48824.2	50298.8	38575.5	35318.5	35608.1	27519	30880.7	31712.3	25770.7	35151	33391.2	42266.9	34624.1	47605.1	26826.5	21448.5	-3349.17	-4191.47	-470.851	-1642.93	-9972.82	-5270.73	-3117.32	2509.74	-4640.71	706.626	-3689.74	607.114	-942.975	-2483.8	-213.675	1508.21	-4456.25	-644.148
120	fret	0.343272	0.636763	0.64894	0.667525	0.625406	0.526764	0.47259	0.390716	0.502445	0.603453	0.412355	0.733599	0.753882	0.681326	0.741559	0.688638	0.530783	0.517685	0.487068	0.390716	0.411279	0.460082	0.408048	0.466347	0.616851	0.663825	0.658259	0.739793
[truncated: 462 more columns]

## Sheet: 242-242_R304W_inter_liposome
1	donor	-2599.97	-3095.78	4381.65	6804.26	8521.45	8295.72	11427.8	8860.05	5542.57	-1100.45	10827.2	3079.65	5921.48	2321.83	-145.114	-229.765	-1056.11	1499.52	1112.55	-850.534	-2237.18	4079.33	5985.98	14229.3	7642.7	-4192.2	6905.04	-1551.92	-528.057	-604.645	-4067.24	5220.09	3494.84	5538.54	5441.8	4401.81	4615.45	-4450.18	-1092.39	-1104.48	-3793.14	4127.7	-3764.92	-1809.9	4059.18	-7578.21	-169.301	-3914.06
1	acceptor	52861.3	57328.9	65066.5	51489.6	56250.6	65999.3	60673.9	58968.5	62472.1	56834.3	51886.1	54262.6	52470	57718.1	51285	54818.6	61428.7	53794.6	56739.3	56369.8	57433.1	61566.6	57372.7	52243.9	60196.7	61173.6	57002	61764.3	53486.1	61892.9	49868.9	55452.9	52316.3	52620.4	58076.8	63715.3	51999.6	59968.2	56868.4	61371.5	59194.6	56450.3	53129.5	62738.2	62485.3	56622.5	58117.8	70751.2
1	fret	1.05277	1.05711	0.936388	0.88404	0.867827	0.887683	0.841432	0.869614	0.919238	1.02077	0.827667	0.946052	0.898697	0.961722	1.00195	1.00412	1.01658	0.973646	0.981679	1.01438	1.03973	0.938312	0.906114	0.785982	0.887683	1.07247	0.89134	1.02498	1.01022	1.01022	1.08806	0.913591	0.938312	0.904255	0.913591	0.934467	0.919238	1.07912	1.01856	1.01856	1.06806	0.932549	1.0769	1.0292	0.938312	1.15532	1.00195	1.05929
2	donor	310065	309499	297253	319452	324557	319235	352258	345150	328398	337976	340371	347325	332400	343276	330073	323614	330428	329920	329070	349785	367903	362189	372181	378346	303203	275561	275897	261965	262081	284143	269102	277915	265419	263319	271935	274393	310415	286248	264213	282826	279237	258033	289678	278821	287010	266748	275300	280975
2	acceptor	43019	54676.1	44021.1	50184.1	40091	48561.7	21360.6	14378.5	27926.9	41151.7	26533.1	33807	26043.7	39508.8	35294.9	25830.9	30349.7	26194.5	1554.6	-9490.74	-1281.85	1444.83	1369.46	-7930.51	-1473.33	-3033	-680.807	-2617.59	-7851.13	-6206.05	-1498.79	449.439	1589.87	2465.51	-304.225	-1224.7	-7927.16	-2566.71	-584.655	1665.9	-1572.95	-2730	-4311.98	-3944.11	-2641.62	4244.5	-497.47	-5997.1
2	fret	0.121957	0.15047	0.128811	0.135729	0.10978	0.132262	0.0573965	0.0401557	0.0782756	0.10844	0.0725198	0.0886243	0.0725198	0.103102	0.0964852	0.0737948
3	donor	126620	121228	115544	136600	138767	110328	113957	110249	129677	116467	109767	132647	117701	111595	111674	118203	121952	104783	142238	128856	104737	105670	138958	129093	138067	117896	141398	135213	104431	113033	126968	115237	109642	116022	111785	99850.9	124921	118022	113539	113358	122935	133357	131339	120026	123947	137000	121683	124188
3	acceptor	11871.2	3201.97	13187.4	2218.6	8614.8	5759.78	11420.5	14830.9	3312.46	8602.09	2322.9	4225.91	11114.3	3810.6	2368.96	7877.67	3825.99	10055.3	5852.24	8620.53	4965.98	14059.3	6085.58	3460.04	6339.31	6758.9	9.253	11717.2	10449.9	9191.33	11214.9	6005.53	3568.05	13196	10151.7	7305.85	7742.52	4129.46	8818.77	13349	11128	6863.08	2488.13	9345.03	2448.31	4392.89	9324.56	11522.1
3	fret	0.0854737	0.0256905	0.102616	0.0159618	0.0582804	0.0495266	0.0913222	0.118468	0.0246586	0.0688741	0.0205468	0.030891	0.0860557	0.032986	0.0205468	0.0627143	0.0303687	0.0878053	0.0393244	0.0627143	0.0452057	0.117232	0.0419892	0.0262094	0.0441289	0.0544321	0	0.0796897	0.0907345	0.0751041	0.0814182	0.0495266	0.031414	0.102016	0.0831525	0.068311	0.0582804	0.0340369	0.0722652	0.105628	0.0831525	0.0489845	0.0185038	0.0722652	0.0195242	0.030891	0.0711324	0.0848925
4	donor	33196.5	25220.5	28504.1	43265.7	46837.7	26768.6	24506.3	32209.3	33787.8	31401.4	22430.8	30248.7	39713.3	24788.6	25461.4	29617.3	17100.3	27294.8	36295.2	40916.5	35353.6	29458.5	37226.5	38887.2	51847	43337.5	56186.7	57331.5	61941.8	61021.5	52931.7	68667.2	76036.2	50187	-1924.37	-200.444	-1168.25	644.487	-254.583	-134.748	1957.2	964.454	-1481.53	371.359	2806.39	-278.306	-2423.18	-538.051
4	acceptor	45804.4	36020.8	36964.1	12060	27979	41943.1	38145.7	35044.4	33653.9	38967.7	33200.3	34246.9	19424.7	41343.4	39239.8	46609.2	61443.4	38794	39229.3	38613.5	26615.9	33924.7	19837.5	34645.9	23732.1	22144.9	12517.6	8371.67	5836.73	10842.2	19427.5	-5827.01	6470.44	-2264.21	1694.8	4495.54	8334.52	3498.67	5070	624.249	1490.73	4133.43	5066.29	5395.05	11277.4	3247.75	6258.91	1032.45
4	fret	0.579746	0.588529	0.564943	0.217487	0.37414	0.61064	0.608736	0.521319	0.49935	0.553953	0.597237	0.530599	0.328306	0.624809	0.606828	0.611591	0.782396	0.586583	0.519246	0.485523	0.42953	0.53572	0.347826	0.471518
5	donor	186737	187058	173854	202994	232092	230416	210793	201940	215868	225632	184523	201243	189017	201142	200841	221815	225522	174677	185051	130253	129011	131268	264971	177181	116620	124494	165279	181364	224475	209223	206600	213987	203030	190969	203775	229699	200419	177849	210832	220596	176198	234819	190953	210122	182645	206889	231635	186105
5	acceptor	4225.88	9129.71	11739.3	10664.8	12812.8	16653.2	8544.5	7153.91	5282.27	-2192.88	-269.655	615.43	3323.8	-3232.77	-811.094	2879.26	1394.54	-2870.79	3596.6	2378.4	7075.45	321.777	19.636	3317.93	2009.79	-3045.68	818.926	-2398.27	-3165.92	5083.35	367.745	-4134.95	-3786.79	-4677.06	740.967	-1303.36	-4910.22	629.656	-5178.25	-519.085	-1377.41	5442.34	-7754.09	-3453.09	-2288.63	-572.115	-5636.33	-2970.91
5	fret	0.0221775	0.0464148	0.0629894	0.0498061	0.0520768
6	donor	53093.8	68618.6	2435.1	61490.6	69749.3	61302.2	40498.7	17904.5	29789.3	56864.3	36597	32726.4	30800.1	38522	61792.3	42242.1	23856.9	20266.1	15442	8607.67	46111.4	99716.5	94394.2	89019	87793.7	89451.3	84335.5	90322.7	89157.7	86632.5	86890	86486.3	82026.7	85681.5	78161	83969.1	100210	91244.5	84991.7	85540.9	98137.9	92806.3	82993.9	78941.6	81924.7	82506.8	84379.6	82531.1
6	acceptor	25993.1	24385.4	83837.2	22355	14165.7	22114.3	52012.3	68107.5	52730.9	27498.6	41038.6	52985.5	56430.6	42639.6	21591.4	45595.3	58192.2	57691.8	72964	75393.4	34146.3	-408.836	-2472.45	-4569.84	-755.697	-3086.15	-704.967	-4805.08	-2717.11	4799.45	-1071.61	-981.594	-3006.82	-7072.87	-4866.67	635.625	1416.92	-1900.07	-2194.39	-6264.82	-2793.11	-4509.28	859.432	-623.313	-3584.63	-819.785	-2610.7	-3544.32
6	fret	0.328663	0.262413	0.971349	0.266574	0.169106	0.265534	0.56208	0.791709	0.638938	0.325573	0.528273	0.61834	0.646767	0.525281	0.25929	0.519293	0.709039	0.739929	0.82504	0.897702
7	donor	8374.39	17136.9	102906	65263.1	67656.8	140665	177353	164618	158472	177263	178317	179895	177163	176935	170051	175662	163128	172732	9964.16	13.78	-3177.21	-4185.31	-105.494	-4482.68	2832.24	-1829.25	587.276	-2428.88	275.202	1302.92	2659.05	49.7261	-1871.73	-1589.06	-1871.73	3057.72	1226.13	641.194	907.517	577.473	-3477.84	-1790.03	-652.846	-2664.16	-2311.24	-977.99	3866.49	-1616.84
7	acceptor	139602	134755	103611	141206	98025.3	709.873	-4105.15	2008.89	935.379	46.158	5832.7	1467.18	-2434.67	1330.7	2256.13	3367.36	7881.77	6498.21	2989.47	6229.31	2154.32	8463.47	4787.16	5100.89	6657.35	4403.78	2256.48	4234.72	4074.36	3963.69	3954.11	4732.31	1366.48	3191.8	3013.86	4592.17	-2432.51	1843.21	5763.45	971.255	4356.06	4957.39	4913.24	632.442	-22.084	1962.44	4279.63	3264.92
7	fret	0.943642	0.887216	0.501296	0.684157	0.591681
8	donor	87408.3	82484.2	91559.1	98341.6	104973	109843	96707.8	104771	111045	103940	95619.7	81868.3	83662.5	84551.9	81999.7	96122.5	92995.7	72698.6	80100.1	77547.8	74100	87098	80555.5	88184.6	119420	134965	132949	110499	84487.7	117939	113070	77899.3	80168.8	103639	105428	89502	83054.2	89712.9	102416	82953.3	97906	93428.2	109368	87257	94583.5	114260	119563	116210
8	acceptor	83070.4	104374	99660.7	95364.2	97361.6	99553.1	99557.6	90182.4	93391.7	72342.9	99397.1	93862.7	102193	98380.5	105508	76133.5	90367.3	111158	111203	83819.3	102300	95086.8	96809.2	93160.9	102872	81471	72675.8	94783.8	104561	108751	98940.1	104727	101924	99620.6	82895.8	90684.4	95476.6	92783.6	81334.7	102213	81222	77612.5	74760.8	99743.5	74726.7	59729.5	53097.9	67530.5
8	fret	0.486874	0.558738	0.520964	0.491905	0.480829	0.475785	0.506961	0.462642	0.456562	0.410679	0.509966	0.533925	0.549822	0.537905	0.562694	0.442341	0.49291	0.604986	0.581435	0.518967	0.579466	0.521963	0.545854	0.513968	0.462642	0.376717	0.353915	0.461629	0.552796	0.479821	0.46669	0.573554	0.559727	0.489893	0.440305	0.502951	0.534921	0.507963	0.442341	0.551805	0.453519	0.453519	0.40555	0.53293	0.441323	0.343512	0.307954	0.367401
9	donor	26980.4	29971.4	29267.6	29083.4	33002.8	27325.3	24044.8	22970.8	19414.1	18693.3	27690.8	15919.4	14908.3	22118.5	19900.8	20390.4	28551.6	64147.8	71225.5	72019.5	94820	85182.6	96649.6	95216.6	82064.7	100296	88312.7	93116.4	95039.9	91682.4	101345	86421.1	99008.2	86927.6	88941.4	90521.9	96381.8	72111.6	96897.7	103925	85737	93006.4	85019.1	85644.9	88676.4	100345	97379.7	89824.7
9	acceptor	70846.4	65039.8	66520	67138.2	63970.8	66401.2	65342.5	77010.2	63903.8	69992.3	72759.9	65527.5	66094	69090.7	76627.4	69407.6	53882.8	-4755.83	-4167.76	-4590.57	2950.52	5089.83	-4739.93	-8056.18	-4283.67	-1268.91	-1577.48	2050.91	-2354.66	1214.44	4391.09	-6621.35	7142.97	-4992.7	-4712.61	-1246.76	688.312	3209.16	-2882.12	4050.61	-5642.56	-3826.96	-1711.66	-8709.72	2589.77	905.905	-8820.32	-3163.33
9	fret	0.724398	0.684456	0.694218	0.698119	0.659995	0.708841	0.731197	0.769925	0.767027	0.789213	0.724398	0.804608	0.816133	0.75736	0.794027	0.772821
10	donor	-1881.32	-378.299	1034.7	56.811	676.378	-686.317	-1976.64	923.499	922.617	-27.0336	465.443	-948.442	1348.02	1261.53	1280.94	4461.74	-1407.38	1591.61	-497.446	1983.47	2441.53	1100.9	5108.67	542.227	29308	41851.1	42504.2	39755	46170.5	44243.8	42671.9	40161.9	47076	49942.6	47663.8	41495.5	46104.3	12264.6	-1229.1	-132.06	-823.116	-696.025	1592.49	-202.666	1729.29	-1702.16	-770.162	-583.938
10	acceptor	44135.4	37526.4	45771.8	43941.9	39736.5	34077.7	44377.5	32128.3	33288.9	38800.1	41253.8	42666.5	37352.5	48066.8	39127.3	51142.4	50297.2	51038	52161.4	32067.1	41011.5	48718.5	44011.1	49355.7	9303.09	3597.14	3545.53	2449.26	-2629.11	4015.87	-1106.01	1028.78	-4589.43	-5199.23	-4407.14	421.411	-2115.67	-2706.69	-2663.59	1288.13	4502.07	-988.954	3384.97	395.788	-345.132	-4090.49	-689.855	-889.534
10	fret	1.04473	1.01033	0.977678	0.998843	0.98303	1.0205	1.04635	0.972284	0.972886	1.00062	0.988929	1.02274	0.965027	0.974687	0.96806	0.919851	1.02886	0.969874	1.0098	0.941541	0.94405	0.977678	0.896156	0.988929
11	donor	19197.4	14630.4	17062.4	20267.7	26099.7	31433.2	27995.9	23350.1	14180.2	26378.7	19784.4	26302.7	30878	18588.4	22476	28372.9	18058.1	23369.5	24008.9	21622.5	17124.5	23754.8	28523.4	24414.9	16721.3	25856.7	21930.5	23305.9	26485	19191.9	20890.6	18991.7	17530.6	15704.9	15667.6	13129.3	22545	12506.4	17164.6	18787.3	22451.1	24247.8	17326.2	22112.8	28468.2	23995.1	29113.1	23415
11	acceptor	26669.8	22302.6	28655.7	31323.9	10160.9	29009	19398.1	12702.9	26219	28376	16619.2	28907.3	32097.8	32533.2	28774	21505.3	31480.1	28017.2	24420.8	33724	29020.8	28556.5	27892.2	31611.6	26736.5	26820.9	28954	31960	19671.1	31158.5	37062.1	29399.5	21774	29823	30254	28528.7	31713	35772.7	42706.2	23692.6	37988.8	25820.3	14711.8	26978.2	19323.7	20509.5	17901.6	33625.3
11	fret	0.581948	0.603803	0.626617	0.606781	0.280337	0.480144	0.408831	0.352322	0.649393	0.518159	0.45608	0.523153	0.510165	0.636524	0.561049	0.430968	0.635534	0.545105	0.504166	0.609759	0.628599	0.546102	0.494162	0.564036	0.615711	0.509165	0.569013	0.57797	0.42594	0.618686	0.639495	0.607774	0.554076	0.655328	0.659283	0.684965	0.584928	0.741097	0.713552	0.558061	0.628599	0.516161	0.45909	0.549093	0.404802	0.461097	0.380605	0.589898
12	donor	72517.5	96675.8	82725.5	102526	80351.8	106079	90398	101691	94572.9	95465.4	93593.7	92752.4	77054.8	105390	89126.8	84897.8	102658	91930.3	85522.3	91717.3	109526	100160	80572.5	97228.1	82690.8	88670	98719.9	95723.6	93480	86831.1	91685.5	97329.2	94731	98624.5	109843	86236.5	89723.3	86520.8	112442	99902.5	97201.1	99831.1	95946.3	102823	95181	89695.4	89269.4	99608.5
12	acceptor	14400.4	12149.9	14067.9	8190.75	7252.17	7707.68	2164.41	3383.72	9271.98	11683.4	11774.8	6587.15	8640.77	11087.2	9823.66	10775.5	8924.56	9688.93	11155.5	10348.5	8052.39	12623.1	13451.6	9178.34	6802.25	3656.54	6680.57	12171.8	10687.5	9531.71	11806.8	9598.83	2540.37	7570.77	9179.67	12450.1	5219.16	5659.12	6161.08	7529.65	8963.81	11867	5399.17	3389.58	10923.4	6143.18	10777.4	7103.17
12	fret	0.165425	0.111612	0.145058	0.0738978	0.0828448	0.0674188	0.0235027	0.0321994	0.0893798	0.109128	0.111612	0.0666106	0.100873	0.0951174	0.099227	0.112441	0.0795862	0.0951174	0.115759	0.101697	0.0682259	0.111612	0.143371	0.0861093	0.0763334	0.0393468	0.0633814	0.112441	0.102521	0.099227	0.114097	0.0893798	0.0258703	0.0714654	0.0771461	0.125752	0.0553338	0.061769	0.0521249	0.0698457	0.0844763	0.106648	0.0529266	0.0321994	0.103346	0.0641882	0.107474	0.0666106
13	donor	12954.6	18618.9	37515.8	31592.4	8681.24	39973.2	23277.1	29934.9	36484.6	24871.8	25528.2	35574	21000.8	24932.1	30807.7	42596.6	39092.9	44792.4	13241.3	17534.8	11352.4	33413.5	14199.6	19129.5	16986.5	27565.6	30850.5	41791.7	40116.5	31828.9	23397.8	33745.5	32865.1	16581.6	19096.8	20354.4	23568.9	27711.4	23586.5	33076.4	13731.8	19876.5	17024.2	27857.3	28194.4	17187.7	23677	10082.2
13	acceptor	102639	82509.9	72526.4	84084.2	82383.5	87850.8	70979.6	81530.6	93352.8	98831.8	84964.7	86572.8	86811.5	63022.3	57985	69473.4	78635.1	77026.6	76708	80400.7	81863.2	70950.4	92080.1	81499.2	79744.4	76303	69931	60255.5	73331.3	65062.4	77686.2	84159.7	69685.6	66994.9	77934.8	67968.5	56587.3	64936.1	83230	76881.8	78097.6	73026.6	70890.8	92360	76943.4	88177.5	74010.3	64110.5
13	fret	0.88839	0.815548	0.659441	0.726831	0.904513	0.687245	0.753275	0.731405	0.718851	0.798914	0.769519	0.708638	0.804839	0.716577	0.652826	0.620076	0.668296	0.632004	0.852865	0.821522	0.87853	0.679421	0.866269	0.809592	0.823916	0.734843	0.693976	0.589994	0.646232	0.671627	0.768375	0.714306	0.679421	0.801282	0.803653	0.769519	0.706375	0.70073	0.778895	0.699603	0.850437	0.785938	0.806026	0.768375	0.731405	0.837134	0.757909	0.863825
14	donor	31953.1	10183.5	17633.4	18175	15857.2	3061.64	6976.99	5922.11	22310.3	25556.4	20096.8	59894.5	39350.9	25470.1	33758.7	31312.1	28274.6	34591.4	37564.3	34072.1	27973.7	26203.4	15436.7	19005	16111.9	11998.8	22317.9	111272	131358	124800	112996	106950	78300.7	102363	106368	124585	129809	101064	115352	115369	114234	101180	117230	137168	124931	126345	110037	136091
14	acceptor	41671.8	46797.7	67501	97886.9	99991.5	108649	100669	92503.9	88221.8	83659.5	84532.8	85677.6	82153.9	106042	77513.8	98378	86526.9	75504.5	77093.3	71715.7	82411.3	97409.6	113313	96009.1	84263.9	77375.9	52063.9	-1049.48	510.401	4191.39	-7037.54	3633.3	1125.51	-2967.16	-6861.7	-4783.67	-2049.68	233.394	681.424	3358.69	-4915.71	-5660.96	-2907.48	-1100.92	-10535.1	-640.849	-1978.06	-1816.27
14	fret	0.565738	0.821355	0.793068	0.843412	0.862748	0.972346	0.935039	0.939573	0.798102	0.765907	0.808116	0.588194	0.676588	0.806452	0.696525	0.758196	0.75388	0.685685	0.672019	0.677501	0.746924	0.788015	0.880186	0.834469	0.839354	0.865915
15	donor	35739	40581.3	33320.6	37300.6	26927.8	20866.6	18942.9	24263.4	31598.7	27759.7	23204.8	26181.5	26983	24503.8	20739.5	23713.4	25877.5	16563.2	17265.3	13290.8	27071.5	24174.9	22168.4	29122.3	17041.4	24835.5	26861.4	24426.5	33276.4	24794.1	16223.3	22682.5	27079.8	24009.1	27618.7	21159.6	49212.9	96085.3	108749	128475	97412	95640.4	101483	111574	108694	114719	114501	122522
15	acceptor	86083.3	85242.5	86259.5	106342	94120.3	82087.4	71593.2	85599.7	85090.3	84276.6	77247.3	84183.3	72633.4	95711.7	69423	79857.9	87047.8	88975.1	85200.1	77749.3	79468.4	78633.1	84168.6	63326.8	86871.7	89058.7	107637	89684.8	101859	70811.3	73076.3	92257.2	91228	96579.6	76263.5	75212.2	63288.9	-4821.14	-2396.56	-2469.47	-1332.3	-4801.21	-12223.6	-382.715	-215.621	-867.105	-2140.65	-7356.2
15	fret	0.70635	0.677261	0.721401	0.740472	0.777625	0.797717	0.790684	0.779634	0.72943	0.752519	0.768586	0.76256	0.72943	0.795708	0.76959	0.770594	0.770594	0.842948	0.831889	0.854009	0.745491	0.764569	0.791689	0.685284	0.83591	0.781643	0.800732	0.785661	0.753523	0.740472	0.818821	0.802741	0.771599	0.800732	0.734449	0.780639
16	donor	62146.3	59748.1	58692.5	65137.5	62967.8	55776.8	55924.1	44676.9	66028.8	51639.4	60556.3	71252.1	112594	144727	90704.3	69325.9	66604.8	61332.4	45536.1	59022.9	63719.3	56426.4	59880.3	57770.9	61645.9	126767	128931	118225	112753	126727	111171	115621	119827	125010	111998	133606	111272	113503	115400	120301	108614	104516	114991	98061.4	120008	116613	106480	141806
16	acceptor	51494.1	46205.8	75806.7	62089.9	59517.7	58634.9	56078.8	62145.6	39810.4	50585	38611.7	56350.8	40546.9	22379.1	55782.1	71019.3	52503.4	57579.9	57353.9	49321.5	53017.5	47380.4	52064.1	60134	46688.4	-1141.21	-2552.29	-2142.45	-148.134	-4933.86	-2449.8	-5538.74	-2819.05	204.911	-3982.09	-3125.45	-206.191	-3103.09	-3289.65	-1982.47	1984.82	1701.43	-1640.16	1495.03	-3053.67	1740.13	1116.58	-4181.2
16	fret	0.453476	0.43566	0.563706	0.487672	0.485639	0.512286	0.500965	0.581932	0.375802	0.494807	0.389118	0.441576	0.264444	0.134074	0.380545	0.506101	0.440588	0.484623	0.557321	0.455468	0.454472	0.456465	0.465466	0.510222
17	donor	16045.8	21899.7	20764.4	16772.9	27928.1	16613.9	20591.8	20436.7	20801.2	18809.9	14094.2	21148.3	16293	21671.9	20017.9	20206	23083.5	23202.7	22594.8	25394.8	15766.6	29641.2	16936.8	26978.9	23194	15540.7	21518.7	28688.2	21142.5	24415.6	29242.7	24080.1	19294.6	16522.8	20882.7	20587	17218.9	29748.8	27190.3	25175.6	15132.5	26149	25745.7	27933.9	25922.2	22256.5	16372.5	21501.2
17	acceptor	52959.3	38359.1	29333	41491.2	40483.3	43327.3	41424.7	45963.2	43525.1	41948.1	52666.3	37035.2	43476.5	44594.5	44812.2	37460.6	42600.1	51150.6	39401.6	50813.2	36238.1	54252.4	56297.9	44835.4	36548.3	31720.4	45059.1	40102.2	47774.7	39127	38233.9	44996.1	32591.4	37286.3	38873.4	48720.4	49688.8	38023.6	40982.3	43553.1	45426.6	44460.4	40920.8	35105.1	40509.6	46326.2	43233.2	53270
17	fret	0.767383	0.636951	0.585164	0.711987	0.591959	0.722844	0.667896	0.691912	0.676245	0.690076	0.789241	0.636951	0.727348	0.672539	0.690994	0.649204	0.648265	0.688238	0.636022	0.666966	0.696494	0.646384	0.769142	0.624616	0.612197	0.671612	0.677171	0.583218	0.69283	0.616027	0.566593	0.651082	0.628436	0.69283	0.650143	0.70289	0.742597	0.56069	0.601624	0.634128	0.74972	0.629386	0.614113	0.556745	0.60932	0.67532	0.725548	0.711987
18	donor	16941	18482.8	36639	42384	32458.8	37557.5	30590.6	35930.1	38278.7	25921.9	29331.9	36543.8	30208.2	31175.7	31328.1	27692.2	36556	40245	31564.8	34406.1	31298.1	31794.8	43342	39103.3	39307.4	36875.8	35313.7	41807.1	32740.5	38995.8	36267.5	43407.3	43656.3	34604.7	35679.7	34929.9	39948.3	38725	37260.9	41707.7	40141.5	1563.41	1834.19	766.018	3174.51	1379.71	-1193.44	227.168
18	acceptor	23085.5	34104.7	11337.2	113.79	3255.3	7986.45	14888.8	10458.9	1274.9	14106.6	17687.8	11194.1	15612.4	19542.3	6217.85	16487.2	6753.27	17001	21490	19435.3	9418.63	6156.28	-3712.93	6856.49	3287.59	1614.9	5919.92	11838.7	12150.6	4386.8	8974.27	2915.18	9998.45	7209.14	7359.07	2059.18	12130.2	17010.2	6026.16	4243.89	8325.14	7129.43	-3832.11	4436.59	1719.74	-2440.87	5634.21	1937.63
18	fret	0.577191	0.648361	0.236646	0.00322705	0.0904698	0.174911	0.327965	0.225899	0.0319173	0.352442	0.376402	0.233968	0.340269	0.385845	0.165019	0.37284	0.156477	0.296618	0.404495
19	donor	4131.29	6726.94	-3512.6	8087.24	4352.96	8171.88	4574.64	5767.68	2136.18	5237.66	294.228	4262.28	10890.5	2271.2	3057.15	604.578	7974.39	1201.1	8867.15	-3824.97	-745.646	4614.95	1539.66	2077.73	-1241.4	10481.4	6553.63	2557.37	13683.6	3365.49	9544.28	18064.8	6436.74	5729.39	5237.66	11285.5	5582.27	2279.26	-2716.57	5654.82	-4155.47	5997.42	1027.78	3034.98	4399.31	4866.86	-523.968	-304.305
19	acceptor	55117.1	53931.2	41875.2	42613.7	48687.5	53188.7	56475.1	53149.7	53167.1	56313.3	52236.5	49245.3	45054.5	50199.1	37511.3	62155.3	42788.6	45091.8	48914.3	48699	63957.2	48457	60925.1	77087.7	57645.4	49917.1	64209.3	80905.7	62137.6	64779.7	45929.5	33249.9	44420.3	43780.1	51106.7	51000	53344.7	73597.6	48304.2	75722.8	53133.9	64002.5	67265.4	45459.6	48794.8	52893.4	55891	54241.9
19	fret	0.930377	0.88949	1.09154	0.840463	0.917776	0.866507	0.925125	0.90205	0.960902	0.914629	0.994707	0.919875	0.805159	0.956686	0.925125	0.990474	0.842543	0.973564	0.846706	1.08512	1.01165	0.912531	0.975676	0.973564	1.02226	0.82695	0.907289	0.969341	0.819682	0.950365	0.827988	0.648039	0.873813	0.884261	0.907289	0.818644	0.905193	0.970397	1.0595	0.930377	1.08512	0.914629	0.985186	0.937736	0.917776	0.915678	1.00953	1.00529
20	donor	68770.9	61256.7	65518.4	66076.8	63555.1	54277.3	55844.9	64403.3	61345.1	61674.2	68143.3	61060.6	54147.7	60541.6	55514.9	65415.1	67654.9	69633	65053.6	51971.8	58378.8	64669.3	63966.5	64734.1	64957.3	64645.7	65459.7	65926.2	65105.2	70307.8	59198	63885.1	69880.7	63178.8	52755.2	55555.2	66173.9	59789.7	59470.2	66704.3	58233.5	58749	58835.7	59227.8	64123.2	57037	64177.4	60649.2
20	acceptor	5668.25	1172.93	3142.58	2793.4	1293.85	694.254	6260.54	-7051.94	8335.21	7338.78	-1698.85	4494.27	-4777.29	-4345.42	3432.09	1016.88	-2668.78	-10153.7	-1438.51	27387.2	-5067.4	775.044	-6309.46	-2414.49	7120.7	-1919.87	3919.11	2597.05	1207.75	2506.74	15681.5	-770.945	7007.42	19.021	-4929.99	-8237.98	-1675.59	-5385.88	5182.06	1014.97	3433.09	-1207.27	1616.8	-2606.82	7159.83	-1784.6	8230.93	-2664.85
20	fret	0.0758035	0.0194962	0.0461709	0.0405146	0.0194962	0.0117428	0.101016	-0.12318	0.120375	0.106335	-0.0259169	0.0684786	-0.096932	-0.0776613	0.0573877	0.015627	-0.0401477	-0.170707	-0.0218867	0.344877	-0.0947735	0.0117428	-0.109976	-0.0381027	0.0992368	-0.0299628	0.0573877	0.038622	0.0175634	0.0348259	0.210044	-0.0118801	0.0902907	0	-0.103434	-0.173022	-0.0259169	-0.0990949	0.0794455	0.015627	0.055527	-0.0218867	0.0271904	-0.0463071	0.101016	-0.0319918	0.11338	-0.0463071
21	donor	55642.7	50646.6	59285.4	55063.4	57623.9	53873.4	53957	57492.8	55559.2	52736.5	51921	48284.6	53034.6	53415.4	53025.6	50866.6	43892.9	54229.1	54616.2	47909.2	49199.7	44695.8	43009.2	40404.7	51343.5	41112.4	45222.1	49708.1	45177.2	53282.5	47759.2	46151.6	51933.6	48078	51118.1	47109	42597.8	46676.1	47920	45158.3	48690.5	50952.8	46214.5	46931.2	46447.1	50510.1	48963.6	44087.8
21	acceptor	-1493.01	1923.26	552.065	5337.44	-2889.19	-2881.33	-1962.72	-838.966	-1314.5	-2716.36	1647.94	1041.45	-319.661	664.664	-943.23	381.875	2469.83	-5274.25	0.93	-824.076	1567.21	6207.03	1872.61	4907.73	1638.01	7450.06	-373.236	3844.03	735.703	-1815.23	1769.08	6482.59	17.212	4152.58	2450.98	2874.51	865.119	2974.94	-951.999	2727.78	7115.88	5528.25	-749.33	4983.99	3699.95	3065.95	3658.72	2039.2
21	fret	-0.0279158	0.0370113	0.00966923	0.0878295	-0.0534131	-0.0562683	-0.037789	-0.0153003	-0.0237008	-0.0548401	0.030215	0.0206563	-0.00554871	0.0124223	-0.0180961	0.0069119	0.0532175	-0.108436	0	-0.0180961	0.030215	0.121772	0.0410768	0.108795	0.0315763	0.153796	-0.00832949	0.0719391	0.0165441	-0.0349626	0.0356541	0.123064	0	0.0799023	0.0451329	0.057246	0.0192866	0.0599266	-0.0208963	0.057246	0.126936	0.0983438	-0.0166977	0.0957247	0.0732688	0.057246	0.0692793	0.0437819
22	donor	-1784.31	2058.82	19303	1637.69	8884.1	32339	24431.3	45793	5580.64	16171.1	3946.06	4638.57	6195.16	2795	6934.47	2657.74	-789.212	11963	1463.01	5312.37	1871.65	9919.75	10244.2	7405.5	5926.89	15525.3	8618.95	-184.046	9114.94	-265.151	-2511.13	10353.3	-1144.83	1135.47	38072.5	13139	28823.4	69622.3	53884.8	59727.5	74981.4	74454.3	66134.8	60557.3	62547.4	73615.1	72623.2	58170.9
22	acceptor	60171.6	61842.1	46958.1	58914.5	62886.5	38509.7	28627.7	31473.9	53407.2	46082.4	55741.1	53647.7	60597.3	50289.1	54384.2	54220.7	55088.1	55897.3	71084.9	49983.4	75582.9	56030.6	64165.2	66986.7	57913.6	49381.3	54246.1	60706.6	54015.5	52286.2	58776.1	55860.4	56751.8	59147.8	24911.3	49271.3	36504	10099.1	6279.41	-499.405	8452.08	3906.23	798.422	3675.61	3708.64	3227.46	9202.03	-110.889
22	fret	1.03043	0.96746	0.708673	0.972438	0.875996	0.543478	0.539347	0.407246	0.904884	0.740054	0.934128	0.92068	0.907308	0.947652	0.886788	0.953824	1.01517	0.823938	0.979924	0.903674	0.976178	0.849823	0.862873	0.900045	0.907308	0.760456	0.862873	1.00252	0.855746	1.00505	1.0445	0.843915	1.02024	0.981173	0.395631	0.789096
23	donor	48311.9	40448.4	48326.3	52003.6	51350.1	48798.1	50558.3	47749.2	48067.2	58129.7	48034.2	50117.5	52245.2	47136	54784.8	44482.8	48681.5	45833.2	49788.2	49382.4	48596.8	47330.1	48665	47489.1	46147	47539.7	47533.5	46975	51574.2	50528.4	49336	48640.2	49931.7	44192.8	45869.3	50936.2	48500.8	46074.8	48962.3	48550.4	47499.4	45610.2	45982.9	43056.1	44351.7	49404.1	47822.5	44545.8
23	acceptor	14299.9	10472.1	4524.9	6518.02	8447.22	6248.1	9420.38	11927.8	12781.6	4520.7	15154.2	12869.7	8514.16	12202.3	11119.5	14005.7	5594.24	8261.89	8348.17	8826.51	11143.6	7463.66	10385.3	13202.3	8987.82	11659.2	4850.62	8885.6	11624.4	13199.1	9886.92	10950.5	11385.4	11398	7486.92	9206.15	8096.71	6989.4	4010.08	9582.88	10499.7	649.167	12258.2	13595.7	5323.13	14180.8	8221.88	5213.16
23	fret	0.228285	0.205077	0.0858072	0.111021	0.141253	0.113795	0.15748	0.199876	0.210268	0.0716094	0.239757	0.203776	0.139893	0.205077	0.168196	0.239757	0.10267	0.152091	0.143971	0.152091	0.186757	0.135804	0.17618	0.218018	0.162848	0.197264	0.0928548	0.158824	0.18412	0.207675	0.166861	0.18412	0.185439	0.205077	0.139893	0.15344	0.142613	0.131703	0.0758832	0.164187	0.181479	0.0134131	0.210268	0.239757	0.106849	0.223161	0.146683	0.105455
24	donor	60143.2	63994.8	68446.3	58136.1	65284.5	55974.1	66349.2	63979.8	53892.1	52764.8	61292.9	54322	43017.1	49018.2	54689.4	38855.5	52459.9	52417.4	52862.3	42677.1	56763.9	62557.6	54586.9	58113.6	59475.8	60683	50450.4	46771.2	68506.3	47456.1	46503.8	69166.1	56369	63212.5	59023.4	69263.6	62862.5	49220.6	50717.8	62620.1	49220.6	70245.9	59005.9	58925.9	58738.5	59723.3	53497.2	51682.6
24	acceptor	7691.1	8144.76	8609.38	9309.02	8923.61	5849.36	4113.78	12163.3	6948.77	4496.76	7156.14	5803.92	5539.36	9960.36	5151.05	2640.26	7437.37	-1503.56	4683.19	8627.35	9527.36	2653.38	6590.53	7397.73	5137.54	9430.25	3348.53	3620.79	8538.18	7003.38	7952.55	4718.58	3176.64	3201.21	4696.05	4928.14	4935.96	6524.13	4395.98	3428.87	6400.4	7215.06	7196.54	7317.85	5657.93	6915.62	3534.85	3343.14
24	fret	0.113364	0.112796	0.11166	0.137951	0.12025	0.0944303	0.0584334	0.159528	0.113934	0.0783958	0.10435	0.0966149	0.113934	0.169097	0.0863367	0.0634603	0.124317	-0.0293777	0.0815541	0.168453	0.144011	0.0408361	0.107709	0.112796	0.0794459	0.134354	0.06245	0.0716338	0.111093	0.128422	0.145835	0.0639664	0.0534678	0.0480751	0.0737027	0.0665022	0.0726669	0.116794	0.079972	0.0519899	0.115076	0.0933422	0.108834	0.110527	0.0879431	0.103793	0.0619457	0.0609391
25	donor	16809.2	30399.2	130938	124969	131721	121936	122469	131325	144249	110175	115678	126387	123655	132183	133021	131346	126581	141958	133885	133650	127314	127264	124552	124623	131479	119602	119577	127239	125625	145494	120012	110537	119579	123173	139192	126789	139540	137619	115226	123782	125791	123750	134676	132939	129172	135691	119456	129997
25	acceptor	73936.7	65663.4	6301.74	11990.6	5023.96	11636.9	7570.05	6029.91	4390.2	7698.63	11173.3	17133.8	6331.19	2498.33	10822.3	9885.14	3943.28	5440.74	11356.6	3176.63	9479.01	1310.88	6848.57	8770.41	5944.13	7059.88	3058.28	1955.01	2589.07	8637.61	15882.9	9072.61	7683.29	8050.79	9865	5988.62	5030.4	5039.62	7855.53	8089.06	5135.1	4794.75	5767.08	6384.54	9778.38	8236.01	9743.34	9290.95
25	fret	0.814599	0.684008	0.0462193	0.0877607	0.0363997	0.0869802	0.0584004	0.0439471	0.0296419	0.0652973	0.0877607	0.119338	0.0484952	0.0184515	0.0753239	0.069917	0.0303912	0.0371526	0.0784229	0.0229169	0.0691463	0.0103024	0.0522966	0.0660677	0.0431905	0.0561083	0.0251549	0.0154827	0.0199384	0.0561083	0.116945	0.076098	0.0606962	0.0614623	0.0660677	0.0454615	0.0348952	0.0356472	0.0637631	0.0614623	0.0394138	0.0371526	0.0409232	0.0454615	0.0706882	0.0568719	0.0753239	0.0668367
26	donor	167247	124416	118566	104944	100369	117090	126923	153153	150822	156934	166080	135578	123608	120152	110820	91838.8	102005	103144	113638	107388	95342.2	123997	116145	118953	135595	135128	141754	101580	128632	122570	127157	108985	124176	94375.5	118616	119960	171093	135667	109275	98898.7	118462	154706	137582	144653	139601	172107	139821	141329
26	acceptor	19287.5	35230.3	24147.2	24246.1	22654.9	26611	30041.1	23884.8	32479.9	18936.3	24372.8	22794.6	21374.2	28433.3	15295.4	16464.7	18478.3	13826.5	14171.1	24749.9	20413.6	20603.3	21241.4	16046.2	20382.1	26926.7	9764.47	19990	24970.6	27455.9	24977.3	32886.5	34306.3	25761.5	26390	25412.9	15961	16817.2	25598.4	25859.7	16895.5	-845.574	6159.16	4422.29	-1268.96	832.24	7606.48	-1560.22
26	fret	0.103646	0.220611	0.169095	0.187652	0.184405	0.185216	0.191724	0.135146	0.177129	0.107446	0.128161	0.14374	0.147667	0.191724	0.121215	0.152396	0.153186	0.118142	0.111255	0.187652	0.176323	0.142173	0.154767	0.118909	0.130485	0.165897	0.0641423	0.1643	0.162706	0.182784	0.1643	0.231515	0.216436	0.214772	0.181975	0.174713	0.0855941	0.110492	0.190094	0.207322
27	donor	76319.9	77419.8	69106.3	73999.8	79497	67104.2	75969.7	74932.2	86876	87303.5	83877.2	90074.7	91466.7	86500.1	87398.1	97425.8	90319.6	85086.6	96259.3	95436.6	94392.5	97528.9	88304.6	92891	86390.6	95389.3	95853.3	90003.8	86882.5	93922.1	91241.2	102446	83795.6	96551.5	92521.5	98804.9	94598.8	92637.5	92091.8	89584.9	85539.9	86321.8	96304.4	102143	84678.5	94897.4	13601.6	-2423.87
27	acceptor	15376.6	12364.8	13933.3	24297.9	18097.4	19919.2	18553.2	-4975.12	-1544.52	2130.68	2020.41	-2503.06	1588.75	-1031.04	3989.74	4384.2	-5689.75	2314.96	-2469.88	-1949.35	2442.86	-1204.72	2276.54	-1269.43	1150.47	-529.79	1788.21	-3014.12	-3124.3	2423.28	1107.11	8583.83	4651.79	-3265.04	-1861.28	-469.981	-3760.16	4274.52	-1425.46	1040.61	2698.59	6644.94	-412.058	-2505.01	1.877	-2143.2	-1438.35	4026.69
27	fret	0.167869	0.137981	0.167869	0.246859	0.185128
28	donor	1373.58	-5122.06	-1575.31	4298.64	-3887.85	3829.16	-6493.81	4626.91	-6259.07	-513.489	7665.66	12507.1	8747.66	6526.82	3495.4	20761.5	1580.81	10711.8	1032.48	5367.8	8802.68	19905.1	5422.82	944.454	12433.8	671.205	623.523	-570.34	5939.97	-3539.41	2983.74	5908.8	-3444.05	3436.71	907.776	7390.58	13125.2	10271.6	-176.053	14944.4	37151	18821.2	133027	8335.03	11474.7	11096.9	5133.06	759.231
28	acceptor	47170.2	49244.6	52404	51461.4	43955.7	50554.5	49797.2	41948.3	40373.7	23328.7	332.458	-2344.85	493.223	1303.06	7389.23	59.369	2604.7	249.757	5888	1772.07	1578.32	486.628	-6614.27	245.749	2307.27	-2686.34	-8.052	9738.09	-5884.49	4601.98	1634.98	4080.82	78.475	1964.48	2199.85	1693.26	-3960.74	-5857.97	-2249.83	-41.25	-1223.87	-5046.32	1352.4	2622.14	1292.65	-3829	-572.82	-1594.79
28	fret	0.971693	1.11503	1.03106	0.922621	1.09603	0.929743	1.14962	0.899816	1.18305
29	donor	8222.28	15287.1	13289.4	15329.5	9100.97	13682.8	14506.2	12176.4	14307.1	18209.3	18973.8	10302.4	17111.6	10348.3	15664	19349.5	63657	111997	104815	119293	110924	113699	105530	112366	114719	98472.1	110106	110394	96196.4	101755	112877	115108	115893	122226	94631.1	97758.3	95329.5	109039	103602	109677	93814.8	108368	110525	107395	115928	104587	92052.7	86938.5
29	acceptor	99234.9	91169.8	88119.2	81261.2	97682.8	94395.4	88320.4	90789.6	85388.3	86385.9	91152.1	98111.6	86217.4	87641.7	84371.8	90610.1	29318.8	1622.93	766.694	-3140.8	1734.98	5205.5	-1167.04	1467.01	-4431.21	-1971.58	358.159	-2816.17	1650.32	-1084.05	642.047	820.45	1743.16	-608.169	4162.71	-5680.71	-392.694	-2420.22	-2667.79	-1027.97	1161.01	2023.25	3110.43	-2840.18	2249.4	-3354.58	3679.1	2404.02
29	fret	0.923188	0.856778	0.868517	0.841113	0.914414	0.873406	0.858735	0.882202	0.856778	0.825433	0.827393	0.90466	0.834255	0.893923	0.843072	0.824452
30	donor	36180.3	30315.7	34830.8	28078.9	29644.1	20960.3	22825.9	17237.1	21456	13892.4	15900.6	17230.9	28378.8	11495.8	18862.9	11479.7	14049.8	7295.51	11094.9	11947.5	15055.4	12373.2	9298.08	15339.8	10163.7	17615.7	20853.7	12402.3	16434.7	14067.2	9206.99	16890.1	11321.1	15609.4	14843.5	10004.4	8218.72	13841.6	10242.4	7558.22	8363.71	17671.4	6389.65	11724.5	9953.62	9443.68	11953.1	6962.78
30	acceptor	1859.24	8309.79	7808.63	1037.48	2662.74	21904.1	5615.69	16395.5	6387.14	17976.8	15869.8	21004.2	15507.7	24092	22367.1	20415.6	19451.1	24414.7	22327.5	20544.4	24048.2	30570.9	27434.2	23138.8	25071.2	24582.6	15132.1	19532.9	26734.9	21973.2	24201.2	21683.6	30940.9	28803.1	19618.1	25929	21385.7	27487.5	23837.7	18865.5	22645.7	12168.9	29814.8	21589.2	22414.7	26641.8	27572.9	6913.21
30	fret	0.0494273	0.215379	0.182403	0.035529	0.0817445	0.511369	0.197524	0.487408	0.230039	0.564538	0.499456	0.549242	0.352867	0.676747	0.542008	0.639822	0.580552	0.770233	0.667899	0.632413	0.614539	0.712009	0.74652	0.601112	0.711167	0.582533	0.42082	0.61168	0.619281	0.609769	0.724516	0.562515	0.731922	0.648988	0.569576	0.7212	0.72203	0.665225	0.699332	0.713688	0.730282	0.407623	0.823467	0.648076	0.692426	0.738445	0.697582
31	donor	13978.1	3367.15	5486.33	106568	154094	138248	155536	151490	162833	164852	162578	183129	136253	175095	154700	-1910.31	1545.63	34.7804	-1988.85	404.487	-477.507	-2131.93	-960.278	36.281	-947.27	-2047.89	48.7883	-1461.06	-440.987	2531.68	-543.544	1014.83	-511.526	-1121.37	-1826.76	-2740.77	-1102.36	-3190.03	-935.263	-578.063	1694.71	3492.22	-1210.92	-3019.93	344.453	-1214.42	-1982.85	-262.386
31	acceptor	158683	158119	143600	62038.1	3640.29	4825.62	1164.72	-3694.48	3623.27	-805.753	3823.17	7849.7	-2789.94	3061.41	2151.01	2095.07	2002.12	-1888.4	976.72	-1761.89	-3344.83	-1390.31	-368.559	-340.796	-801.843	-197.503	-3691.1	3690.32	1625.89	1948.4	968.012	1247	319.375	2229.2	-1127.13	2602.89	2135.63	-1008.92	-1965.74	-213.318	3914.13	1595.97	-789.327	-1294.68	-2704.47	-3638.64	-3103.19	-2105.9
31	fret	0.919459	0.978937	0.963056	0.367453
32	donor	58241.5	62158.8	55350.7	51500.2	58680.7	62237.6	65042.5	66517.7	60977.2	70117.5	60685.9	56288.8	57014.5	60487.8	58785.8	62626.7	65338.5	50430.8	48375.4	52541	60705	56814	62294.9	52638.9	53128.3	59776.4	54066.4	54474.6	61024.9	61965.5	58673.6	58301.2	58960	57916.9	56666	66384.1	68336.7	53409.9	54765.8	55501.1	62989.5	56539.5	52660.4	58093.5	72464.1	62827.2	59487.6	61805.5
32	acceptor	12219	8629.97	13705.6	17249.7	14042.8	8393.59	10029.1	15093.2	14552.1	12020.2	16607.2	11813.5	9396.79	16563.9	12999.1	14647.7	11889.8	14066.2	21608.6	17319.3	11447	12770.5	7232.85	16646.7	16996.3	17049	15323.8	12499.6	15674.1	16407.8	17554.3	19218.1	13265.6	13858.3	13531.9	9447.68	12180.3	11213.3	12964.5	10649	15446.7	15165.2	14306.5	21089	8973.49	12325.1	10600	19760.7
32	fret	0.173005	0.12196	0.198279	0.251156	0.19265	0.119192	0.133972	0.185156	0.19265	0.146017	0.215207	0.173005	0.141381	0.215207	0.181414	0.189838	0.154375	0.218035	0.308507	0.248308	0.159024	0.183284	0.104461	0.24072	0.242616	0.221808	0.220864	0.187026	0.203914	0.209557	0.230309	0.248308	0.183284	0.19265	0.19265	0.124729	0.151588	0.173939	0.191713	0.160887	0.19734	0.21144	0.213323	0.266379	0.109979	0.16368	0.151588	0.242616
33	donor	153876	168113	167707	165673	152450	148415	163929	169730	161821	150989	159239	174739	162219	172399	176207	174649	164612	162780	169588	164916	157076	183335	159061	158084	105346	15957.3	13270.6	8907.09	-4728.27	-821.675	5341.17	-2906.55	-1711.11	2493.32	-2251.71	1283.61	-1751.91	-2233.36	2103.68	-2920.83	6332.6	-2166.04	2593.28	1338.69	6506	7022.12	414.565	2817.68
33	acceptor	9577.03	5676.8	9786.78	5533.89	3773.4	8573.23	6783.85	68.744	6958.18	5672.32	5795.14	6634.86	10223.9	3164.63	5121.34	4393.58	3473.49	-2780.08	1458.69	819.621	4959.79	5314.12	-220.125	-2894.97	-4450.29	-3548.95	1750.07	-2135.44	652.407	284.88	1207.5	4436.2	2511.25	1330.05	-1153.49	5333.57	-642.379	2861.61	2835.69	-911.619	-883.53	4850.2	2031.72	950.325	880.612	-2335.93	-3870.21	-1248.89
33	fret	0.0582504	0.0326371	0.0548391	0.0326371	0.0240372	0.0548391	0.039978	0.000641256	0.0413191	0.0359665	0.0352997	0.0366339
34	donor	42233.1	39683.4	40139.6	44196.3	65581.6	76008.6	53791.3	60695	65732.3	59918.1	75054.4	67489.8	68670	63743.7	77206	89882.3	93827	91434.1	68553.9	83141.4	74002.6	33651.2	34845.7	69626.1	92545	81628.3	90307.9	81353.4	76790.6	80049	79232.3	36352.7	-1346.12	-277.974	2810.39	4283.8	4331.66	-547.811	3135.21	1963.2	626.235	154.784	-3260.44	-1031.48	-2708.54	-4479.29	1614.96	1190.35
34	acceptor	51920.6	50871.2	48184.6	35791.9	21178.2	17405.7	36764.2	15603	18520.4	21616	8501.34	11364	11231.2	8484.37	-5144.57	-8969.94	-1009.21	-3560.52	-3511.7	2883.54	-2040.71	-6055.25	-3498.36	-3966.43	-2372.3	1441.76	-1876.46	4085.99	782.924	2624.69	-1284.03	3380	1077.67	-1804.55	1217.63	2110.75	-684.025	-2945.46	-4738.48	-413.463	671.081	-200.102	13104.2	2351.25	-3929.18	-183.885	3489.21	-6404.98
34	fret	0.551381	0.561616	0.545256	0.447793	0.24453	0.186565	0.405506	0.20485	0.219556	0.265028
35	donor	1818.93	4782.45	4418.9	6897.89	20237.2	377.394	2406.7	4270.69	10018.5	3641.12	3558.79	1789.16	6240.45	1275.51	4915.45	-26.6924	8568.07	6743.34	3464.41	5063.66	472.399	1722.66	2378.83	4014.81	3242.74	1405.35	91684.5	81019.3	79535.3	76635.8	79266.2	73187.1	83378.6	78299.6	71535.9	71236.4	72891.3	82633.8	75098	72752	79878.6	73650.7	77281.2	72865.4	78963.4	76035.4	75972	82342.4
35	acceptor	91714.1	89145.1	92690.4	88136.2	71493.5	84861.7	87785	90736.1	76881.2	87499.4	88714.5	80369.5	89939.6	79044	87603.6	85187.4	92883	84748.9	85304.7	87301.4	95368.7	80258.8	87080	88445.4	86245.1	84551.8	4218.72	999.328	-1871.83	-728.834	6911.03	3722.74	3777.62	2025.24	5964.32	2149.74	3479.24	763.329	1198.11	1724.15	1552.11	3227.05	-6376.97	-87.399	-3079.83	2587.79	-5428.17	-5185.61
35	fret	0.980668	0.949229	0.95479	0.927862	0.779844	0.995403	0.973286	0.95479	0.884888	0.960345	0.96127	0.977901	0.935303	0.984355	0.946446	1	0.91575	0.926	0.96127	0.945519	0.995403	0.978824	0.973286	0.956642	0.964045	0.983434
36	donor	15435.3	38728.8	50125.5	23739	4761.93	4447.38	35530.9	84946	12520.2	26889.2	13818.4	42312.5	86349.1	86234.8	93751.5	84827	90213.7	82186.9	87910.6	93564.2	137433	131108	129317	131476	124396	110646	98981	91015.4	87381.6	86887.4	95513.9	92279.5	90342.1	96287.9	121627	126858	103040	72905.4	121221	124015	121912	97703.9	119668	71126.5	68274.4	75691.6	72322.9	73059.2
36	acceptor	109127	82053.5	84221.4	99191.3	116655	109595	89119.7	43009.5	111808	102523	99907.2	66850.5	-3801.31	1727.68	-1106.9	-1821.95	-4053.58	-2741.72	-189.521	-1752.9	-5300.59	-2485.36	87.027	-935.638	-1950.21	-3499.78	-2293.89	-1648.54	-1624.41	-5355.53	-4683.5	-1832.13	-2410.07	827.283	-794.557	-1245.52	-2902.18	-3289.22	-221.003	2988.99	-3983.76	-6194.03	-3623.36	-2818.8	605.202	-482.552	1344.18	-2417.07
36	fret	0.875756	0.679491	0.627153	0.806781	0.961233	0.961233	0.714782	0.336345	0.899131	0.792604	0.878804	0.612077
37	donor	105187	83945.1	24346.6	11170.4	24850.4	95730.7	219731	216920	148046	134307	96709	10853.1	12937.3	15509	159733	177137	194622	173227	198198	154534	175916	188153	182925	168509	179286	163725	168967	166395	186609	162053	177346	170151	184214	183766	171895	180258	169431	183101	215484	180261	145222	118785	127864	130286	132435	156932	146969	122793
37	acceptor	74033.1	77569	111017	116054	111686	75472.5	27839.1	32727.3	54279	49654.1	66549.3	115511	113541	106585	50048.2	37721.6	21121.6	32725.3	27489.1	39931.4	32659.8	27656.2	28084.8	27060.6	24236.4	33676.2	26946.6	25759.4	26232.2	31975.3	34768.4	23349.6	25441.2	18361.7	30737.5	25412.4	23313.8	17873.6	-807.274	-764.966	-1732.59	-5833.12	1794.93	-7429.44	2460.93	-2876	-2342.57	-1592.09
37	fret	0.413362	0.480117	0.819971	0.91301	0.818332	0.440788	0.112309	0.131315	0.268186	0.269799	0.407406	0.914821	0.896857	0.872259	0.238278	0.175449	0.0981562	0.159015	0.121733	0.205332	0.15632	0.128103	0.13325	0.138443	0.119205	0.170609	0.137792	0.133897	0.123001	0.165125	0.163762	0.120467	0.1211	0.0909111	0.151633	0.123637
38	donor	28081.4	26719.4	27876.9	23728.7	18026.8	26029.5	27813.4	74907.5	105753	-3440.78	-3518.46	1835.61	-1981.09	-2671.02	497.094	-1703.12	-1183.54	-2154.29	1794.99	-1211.34	6.01885	146.428	-683.198	-775.853	914.045	145.002	-2133.62	1856.28	-883.477	178.5	-3364.51	3896.13	82.2808	-314	1775.74	-1004.64	2850.55	81.5684	730.872	-4266.12	529.167	3105.71	-1842.11	1505.62	1772.18	-1269.78	2190.56	-4132.13
38	acceptor	82008.2	96725.2	86814.8	91492.9	99027.5	99677.1	90905.9	54177.1	813.527	-1104.6	1523.87	-1702.01	-957.202	-3229.37	-2618.95	1077.46	-2487.97	-1392.53	-2303.91	417.961	-2651.55	464.854	1650.54	-3724.51	-852.295	1843.89	-1054.27	-3672.54	2202.27	-3936.85	1899.41	-1345.57	-1546.26	-2389.41	1394.67	3787.92	3051.85	2079.49	951.651	3090.88	-2094.67	232.46	1911.17	-1968.27	-3645.97	-968.033	-1759.37	-3381.85
38	fret	0.745207	0.78361	0.756446	0.7939	0.845906	0.792757	0.765473
39	donor	91281.3	90986.9	93907.4	95327.9	85405.8	90121.1	96366.6	95144.2	94023.5	88790.2	87374.5	93884.7	92015.3	94774.8	94795.3	90757.9	76313.8	94143.4	83501.8	89326.5	97774.7	88262	83056.8	98807.9	88168	91537.8	84414.6	83980.9	94396.7	98566.5	91753.3	85844.3	88779.4	91865.7	90324.2	95340.3	88616.8	92443.6	84454.6	87613.3	98020.4	87990.8	90408.4	86944	96343.3	88877.2	84117	96057.1
39	acceptor	7701.31	15199.7	6741.38	2461.73	7476.14	5320.96	3949.98	2706.4	4160.15	6287.42	5701.82	757.451	6198.67	9462.23	3928.26	3994.57	11217.4	6466.69	3942.59	3893.16	4959.49	4442.95	14661	9366.63	6134.98	5632.66	6186.32	8021.47	9905.52	9651.92	5099.02	6953.85	7034.88	3125.43	9565.95	8792.29	10335.9	7001.06	8290.24	10463.5	8297.71	7475.59	8606.78	6284.33	9182.87	5062.85	4887.42	9760.7
39	fret	0.0777134	0.143509	0.0667509	0.0249029	0.0807033	0.0557893	0.039847	0.0278916	0.042836	0.0657543	0.0607717	0.00796838	0.0627648	0.0906703	0.039847	0.0418397	0.128552	0.0647578	0.0448288	0.0418397	0.0478179	0.0478179	0.150489	0.0866834	0.0647578	0.0577823	0.068744	0.0876801	0.0946573	0.0896736	0.0528	0.0747235	0.0737269	0.0328728	0.0956541	0.08469	0.104625	0.0707371	0.0896736	0.106619	0.0777134	0.07871	0.0866834	0.0677474	0.0866834	0.0537964	0.0547929	0.0926638
40	donor	104832	99664.6	94207	104634	100611	95861.5	95261.6	100916	101483	100452	98642.9	96655.9	97011.1	96620.3	96550.9	96503.5	97706.9	97071.4	96917.1	100373	98487.6	96606.6	94112	96831.3	99363.3	79263.2	64997.8	74244.8	56518.8	59612.4	76244.5	63401.7	64149.6	41843.4	59443.5	75164.3	55076.1	72070.7	46742.2	50307.9	61782.8	57080.3	62174.5	58813.4	56657.6	31378.4	50021.2	53073.7
40	acceptor	-1526.93	4588.76	2034.74	4162.9	-1712.77	5132.22	3837.72	1832.31	860.779	2835.11	4339.14	8681.73	3663.88	-2600.93	2955.98	92.116	4823.8	3076.35	918.683	-1379.05	1797.38	4917.73	2774.99	-493.749	2678.59	24606.8	41325	29270	46434	41858.3	24087.3	41301.5	40660.3	54837.9	45930.4	24106	51571.4	34357.4	54403.5	54272.9	48337.5	39688.7	39231	43791.1	43415	71874.7	46727	48710.2
40	fret	-0.0146728	0.0435582	0.0206546	0.0387522	-0.0171258	0.0507516	0.0387522	0.0182326	0.00852349	0.0279079	0.0423575	0.0828908	0.036346	-0.0281911	0.0291149	0.00121924	0.0471573	0.0303214	0.00973899	-0.0134471	0.0182326	0.0483559	0.0291149	-0.00488234	0.0267003	0.237	0.389004	0.282434	0.45152	0.412103	0.240351	0.39428	0.387949	0.567211	0.436033	0.242583	0.483232	0.322773	0.53754	0.518564	0.439138	0.410012	0.386893	0.426696	0.433961	0.696504	0.483232	0.478144
41	donor	58700.2	67780.2	52495.1	69523.8	37733.5	53940.7	62308	59123	60467.9	62440.9	48589.3	52495.1	56070.8	57246.6	47087.4	57230.5	54673.6	70268.7	60182	51746.2	47538.4	51399.9	47824.3	50002.7	57009	59735	64434.1	59904.1	48524.9	55905.7	45541.2	47933	56964.7	36195.4	38321.4	56171.5	41393.7	53928.6	45488.8	48182.6	43229.9	49084.6	60556.5	47618.9	34347.1	47735.7	57391.5	61104.1
41	acceptor	58500.7	45063.3	39370.9	45865.9	55706.1	43326	47120	38722.4	47372	61123.3	61936.6	50438.2	43041.2	45821.2	40862.4	40655.3	36305.3	27894.5	49094.6	45777.1	66681.6	54125.4	59077.6	49742.4	54224.7	64181.9	52753.8	57486.9	44365.7	72051.5	49640.2	50104	43896.5	51938.1	52383	59258.2	52156.4	61081.7	59599.8	47369.2	56479.8	47173	70404.9	54330.7	55195.7	56444.7	62654.1	55377.6
41	fret	0.499067	0.398886	0.42898	0.397925	0.595954	0.445726	0.430941	0.396004	0.43881	0.494965	0.560552	0.48987	0.433887	0.444736	0.464648	0.41532	0.398886	0.28393	0.449691	0.469664	0.584071	0.51242	0.553137	0.499067	0.487837	0.517585	0.449691	0.48987	0.477723	0.562676	0.521728	0.511389	0.434871	0.589462	0.577624	0.513452	0.55737	0.531089	0.566934	0.495985	0.566934	0.48987	0.537359	0.533176	0.616678	0.541552	0.521728	0.475705
42	donor	32383.7	30250.1	39364.1	29548.7	23105.9	36199.4	26052.2	26923.7	12549.2	25470.5	24788	18227.6	27492.8	27280.7	32366.9	24834.2	32551.7	28322.3	24651.5	36218.3	25367.6	27992.6	28931.3	28404.2	29947.7	34464.8	32944.4	37824.8	28784.3	25531.4	24370.1	36161.6	33584.9	26533.1	33267.8	26619.2	29846.9	27431.9	36831.5	20270.9	22307.9	41480.9	42722	38414.9	25957.7	27007.7	26671.7	27996.8
42	acceptor	27360.2	32643.7	33774.5	33022.7	35706.1	23290.5	34338.6	46313.8	57451.6	38705.5	39292.1	37236.4	50550.3	35102.6	38422.9	28597	21961.1	33652.5	46707.5	49349.5	32914.2	33410.3	36405.4	35170.2	40083.9	31790.9	31015.5	23389.8	40120.9	43176.5	50096.2	19920.4	32250.1	32014.6	31838.9	34976.3	40267.9	41501.1	34686.1	38769.4	39633.1	31148.3	26135.4	34974.8	40080.7	33858.9	47333.6	40359.3
42	fret	0.458011	0.519045	0.462018	0.528037	0.60683	0.391804	0.568962	0.632707	0.82099	0.602847	0.612804	0.671472	0.647624	0.562977	0.543017	0.535029	0.40285	0.543017	0.654582	0.57694	0.564972	0.544016	0.556991	0.552999	0.571954	0.48004	0.485044	0.381757	0.581923	0.628728	0.672465	0.355616	0.490047	0.547011	0.489047	0.567965	0.573949	0.601851	0.485044	0.65657	0.63967	0.428941	0.379747	0.477038	0.60683	0.555993	0.63967	0.590893
43	donor	43967.9	16316.7	40360.9	31990.4	17075.3	5038.28	9444.79	14862.7	140268	82867.9	74185	75055.1	83682.2	85467.1	80454.5	90085.6	69655.8	102892	96682.3	83901.6	96031.6	96541	78532	90859.1	80205.4	100933	95109.4	75906.7	89527.8	85102.7	121418	74218.5	97939.2	133485	114546	89977.8	101873	102160	117915	91892.8	98827.9	83611.6	90063.3	98214.4	88984.9	105001	105313	70711.9
43	acceptor	53823.3	61035.4	58060.5	82293.4	75336.9	70530.9	70149.6	72608.8	692.816	4403.66	-198.642	1496.82	3334.15	1148.69	-3790.86	-618.439	3234.46	288.298	-1649.92	-2970.18	-4376.76	-573.026	-728.221	-9340.68	982.496	-4328.56	-5553.4	325.971	356.105	-4058.05	8848	436.353	428.525	-7889.2	1711.02	-2793.63	-680.304	-1395.17	-3942.04	-9840.61	-6056.75	1949.01	1049.97	-4736.18	-4699.06	3169.38	6750.73	2893.24
43	fret	0.549893	0.789751	0.589972	0.72032	0.815316	0.9331	0.881822	0.829769
44	donor	91986.6	96525.3	109974	108797	112580	125791	143293	138404	90829.8	74101.7	103814	106710	107934	103591	119699	135466	142207	142628	136812	131452	140933	133421	21081.5	-2353.68	-3812.39	1006.44	-3681.76	685.668	-611.933	-1346.37	-1214.29	-71.9921	463.595	-1561.19	138.469	2851.24	1311.25	-3912.54	7064.82	1039.82	2978.97	508.591	3770.01	555.037	-1842.77	880.163	350.381	-2987.97
44	acceptor	33502.4	34105	31381.1	36123.7	33510.8	22199.2	9954.84	21846	45015.9	39790.8	35406.3	26769	30994.2	6528.7	-2887.86	-5097.22	-5401.8	2153.19	-3222.8	-4845.86	833.821	-5496.8	-1745.11	-1077.79	-1659.5	2902.1	763.217	2054.75	-1132.66	3025.26	-2162.29	1538.88	2122.23	-1407.26	3211.82	2011.24	-699.859	-2699.05	-1002.72	-4242.86	-1850.51	-2092.45	3299.9	931.786	202.982	-1675.97	-587.595	-2945
44	fret	0.266574	0.261269	0.222049	0.248961	0.229814	0.149767	0.0651999	0.136691	0.331665	0.349296	0.254224	0.200682
45	donor	78367.9	87343.7	85552.3	98205.1	70385.3	68895.7	63031.3	80637	92673.8	91379	74433.2	54589.8	66651.7	79115.9	67387.1	76256	79361.1	67908.8	59901.1	49454.5	70177.9	68392.8	81007.9	68556.2	78543.9	71171	75935.4	69096.8	79675.3	73063	73427.5	86840.8	91837.8	83201.5	81649	82736.4	69819.6	72604.1	69316.8	82679.8	78751.4	94201.2	84590.6	73622.4	68116.2	79185.1	79637.6	77381.1
45	acceptor	2234.77	-3665.84	-7124.23	-10121.2	6940.64	9591.7	9208.35	2206.72	12133.6	8337.32	712.91	13516.5	10459.5	19993.8	5515.28	25795.5	10859.8	16749.5	28310.4	37755.8	22599.9	-7070.09	-5873.34	6919.92	8462.31	2065.44	10717.3	3667.47	-438.527	8167.23	4905.65	8693.16	16903.9	-5875.26	3874.19	5130.81	-5034.07	4602.2	2399.4	8945.2	-5845.91	10482.8	3432.37	-530.641	12274.5	1321.69	9038.61	7464.46
45	fret	0.0280736	-0.0440401	-0.0911668	-0.114697	0.0899977	0.122518	0.127231	0.0266184	0.11548	0.0838957	0.00928747	0.198384	0.135917	0.201711	0.0755528	0.25263	0.120168	0.197553	0.320893	0.433397	0.244009	-0.115344	-0.0778899	0.0915278	0.0968974	0.0280736	0.123302	0.0501069	-0.00568085	0.100747	0.0627641	0.0907625	0.155071	-0.0758856	0.0449311	0.0582835	-0.0778899	0.0597759	0.0331802	0.0976664	-0.0798909	0.0999759	0.0390419	-0.00709698	0.152661	0.0164794	0.10229	0.087706
[truncated: 462 more columns]

## Sheet: 242-242_inter_liposome
1	donor	37693.9	38136.2	35921.6	35686.3	40977.7	39207.4	44094.6	41357.6	35416.8	47097.2	35735.1	40996.3	42826.2	41060.7	37247.6	51678.8	47351.1	50189.7	46462.5	35796.6	37837.4	49642.9	45241.9	42841.8	41716.9	46094.4	43600.5	48132.3	43321.2	43661	46835.5	39782.5	45187.3	49835.2	44748.8	43336.9	46599.2	44381.7	41783.3	46199.8	46824.8	43201.1	57263.2	51406.4	45802.4	50225.8	47187.1	44011.6
1	acceptor	24476.2	18514.1	20339.3	22842.5	21828.4	18498.8	17395.5	23502.2	23362.2	29586.5	25339.1	20828.8	19822.1	21193	23080	16359.2	22131.2	18824	20508.6	27916.7	24057.2	24576.2	19602.1	25322.1	23434.1	22837.2	23774	18446.1	23225.7	26195.1	18327.9	25807.5	29829	24419.9	20196.4	28507	25131	31671.8	26616.6	23415	36717.7	27426.6	22982.7	30561	30337.8	21201.3	23059.7	27420.3
1	fret	0.394175	0.327011	0.361679	0.390119	0.34742	0.320879	0.282964	0.362697	0.397215	0.386062	0.414422	0.337222	0.316788	0.340283	0.383018	0.240752	0.318834	0.272688	0.306553	0.438655	0.389105	0.331097	0.302455	0.371846	0.359644	0.331097	0.352515	0.2768	0.349458	0.374894	0.28091	0.393161	0.397215	0.329054	0.310648	0.397215	0.350477	0.416444	0.389105	0.336201	0.439663	0.388091	0.286045	0.372862	0.398228	0.297332	0.328033	0.384033
2	donor	30872.2	33727.4	35480	28098.6	31923.6	26109.4	30358.7	23822.1	32135.3	30667.8	32281.7	25323.1	28114.9	33632.2	33030.8	30771.1	30504.2	19826.1	29416.5	22552.2	32609.8	37083.9	43508.1	45691.3	43369.9	37785.5	44661.6	37915.1	45666.3	35538.9	40986	41920.1	36132.2	40826	38779.4	37306	41918.3	37015	41986.7	38364.2	37940.9	38938.4	42075.1	38100	35982.1	41238.9	38762.1	43498.6
2	acceptor	18239.5	17907.1	15380.1	12667.5	20770.3	14947.6	14752.6	21137.4	18451.5	14748.3	13928	24613.9	19356.3	14919.8	20181.8	18492	16329.1	27145.6	18628.5	17725.6	17465.3	15983.8	4653.37	3236.29	3168.67	5955.04	1166.81	2264.76	1574.81	-404.936	2722.25	644.239	3105.14	2763.85	1348.61	-894.297	8038.28	4786.38	8641.5	3807.36	3931.73	3573.14	912.634	8175.11	11814.8	6796.09	3012.6	5971.51
2	fret	0.371662	0.347058	0.302593	0.31024	0.393926	0.364199	0.326556	0.469766	0.365267	0.324381	0.301498	0.493187	0.407596	0.306965	0.379103	0.374854	0.348133	0.577837	0.387579	0.439912	0.349207
3	donor	91324.7	93064.8	90670.3	96815.6	94314.2	97102.9	107741	103935	101951	100994	100060	99618.4	110107	96425.4	113981	125265	125882	123724	132210	133551	136656	120884	135838	121301	130668	135643	138646	129970	132435	125638	139556	135341	136659	136445	140595	143931	139441	133562	149964	143188	139715	145821	140544	135400	146778	140208	125716	140330
3	acceptor	47822.9	52611.1	42715.5	48376.7	51643.4	35706.4	48384	43835	53297.9	46261.3	55250.3	46245	44348.6	56306	30339.1	9444.93	11360.9	5558.41	7865.3	7332.34	11768	8710.12	6591.11	4576.23	13420.9	3781.73	11521.8	8554.73	13803.3	12281.8	8225.5	6213.65	9314.2	7975.57	10161.6	6416.62	9382.27	9324.52	12936.3	12760.9	3921.94	11908.5	6804.24	15194.6	9082.37	8904.74	6504.9	3332.24
3	fret	0.343815	0.360781	0.320494	0.333519	0.354166	0.26926	0.310321	0.296536	0.342877	0.314014	0.356054	0.316789	0.287401	0.36837	0.210598	0.069947	0.0829632	0.0425962	0.0562182	0.0522019	0.0788855	0.0675168	0.0465923	0.036221	0.0927872	0.0274921	0.0764433	0.0618593	0.0944298	0.0886874	0.0554153	0.0441936	0.0634739	0.0554153	0.0675168	0.0425962	0.0626664	0.06509	0.0797003	0.0821469	0.0274921	0.07563	0.0457924	0.101015	0.0586344	0.0594401	0.0489943	0.0235385
4	donor	17222.9	20396.3	16281.9	15083.7	17716.9	19166.8	14704.7	20258.8	17465.3	12795.5	14036.4	13388.3	18196.4	15247	15847.7	14404.8	12416.6	14826.8	13158.2	16918.2	15690.5	11888.8	12901.4	7785.91	16083	14504.5	13915.2	12608.9	22031.9	14556.3	20751.1	20456	15123.2	18971.8	15167.5	16499.7	16248.6	20030.9	12369.2	14890	15237.3	16428.6	11401.4	16862.4	18456.8	16851	12825.8	16700
4	acceptor	10019.3	15565.7	2865.04	8962.29	14852.2	9156.84	14524.4	7410.81	10830.8	11679.3	11982.6	13793.2	11591.5	11443.3	15317.9	5262.34	11510.5	9904.85	10827.3	7078.12	12088.2	13307.3	9854.73	9448.49	11000.1	16522.7	5531.68	11032.6	9354.11	14329	12208.7	12789.6	11655.2	12257.9	12800.7	13914.1	10718.9	13584.4	16879.5	13997.8	16475.4	15006.6	18909.3	14802.9	8479.78	20017.2	8880.29	13486.2
4	fret	0.36785	0.432845	0.149412	0.372436	0.455621	0.323479	0.496894	0.267803	0.382682	0.476951	0.460986	0.507269	0.38948	0.428462	0.491676	0.267803	0.481175	0.400734	0.451313	0.294709	0.435031	0.527769	0.432845	0.547945	0.406326	0.532843	0.284985	0.466329	0.298338	0.495852	0.370145	0.384952	0.435031	0.392866	0.45777	0.45777	0.397368	0.404092	0.576639	0.484334	0.519608	0.476951	0.623671	0.467395	0.315149	0.542931
5	donor	93929.8	76964.9	84674.8	77294.4	74409.2	106618	91418.4	80705.5	88352.2	79433.6	66168.3	91059.9	81936.4	70487.6	80900.1	65744.9	72601.2	77364.4	81385	81017.9	64563.5	70344.2	83933.9	82291.5	73758.7	82545.9	74661.8	81400.3	70909.3	65125.2	83949.2	68645.5	71117.6	75396	75508.6	79177.5	72853.9	62644.6	62958.7	91230.6	67093.6	81168.1	83993.6	83795.6	74228.2	72350.2	72631.9	70975.9
5	acceptor	40636.9	41112.1	44202.3	56672.8	57180.9	26612.2	22975.5	32303.9	22882	39432.6	47750.3	43910.4	46620.5	41758.9	49061.3	46374.5	45399.6	43714.3	36264.6	35539.1	46830.7	50188.6	40408	43805.2	37630.1	44274.1	46073.7	52180.8	51073.5	45582	39078.6	42914.4	45184.4	34860.4	49729.2	40728.2	45164.7	48911	57765.8	52399.7	44996.3	48898.4	45132.4	43493.4	47910.5	41696.1	46880.7	44820
5	fret	0.301598	0.348479	0.342974	0.423427	0.434239	0.199353	0.20097	0.285798	0.205835	0.332039	0.419518	0.325707	0.362355	0.371696	0.377336	0.413679	0.384897	0.361425	0.307801	0.305138	0.420494	0.416595	0.324805	0.34756	0.337494	0.349399	0.382056	0.390599	0.418543	0.411739	0.317615	0.384897	0.388695	0.315813	0.397286	0.339318	0.383002	0.438194	0.478459	0.36515	0.401123	0.376394	0.349399	0.342059	0.392506	0.36515	0.392506	0.386795
6	donor	190315	159315	162379	184856	168298	188929	124922	182582	146904	172274	164319	198812	208579	242001	150787	154194	155296	185125	156480	187640	134179	213158	170265	169027	205136	206456	241246	254867	173326	210113	234170	180631	249723	258282	232476	261939	256148	224311	252714	254170	203723	270794	233434	265724	250747	197251	247858	263134
6	acceptor	91549	156501	48625	96070.7	39968.8	99931.7	108483	38769.5	106527	118469	54798.9	127038	57595.3	12015	109243	59208.2	90505.2	85149.1	70895.3	147671	35215.9	125243	76166.3	46168	133048	94581.7	57084	-22145.8	-1066.9	-28990.9	7035.99	3053.9	13179.5	16017.1	-8713.18	-35783.7	41078.1	-2812.11	-6831.44	12887.6	17567.1	18626	6187.21	27716.4	-3530.52	-19523	4214.78	9943.73
6	fret	0.325158	0.495933	0.230456	0.342138	0.191582	0.345514	0.464831	0.175542	0.420289	0.407322	0.249576	0.389893	0.215978	0.0471479	0.420289	0.277869	0.367849	0.314888	0.311451	0.440581	0.207478	0.370067	0.309156	0.214766
7	donor	42819.1	44475.8	43074.5	44448.2	44938.3	42054.2	34818.5	45859.1	35606.8	40844.8	39159.1	33679.5	45478.1	36559.5	38116.8	33932.2	31086.8	48261.4	36573.3	37628	41042.2	37534.2	44016	61479.2	48754.2	59774.2	53804.5	65369.7	56105.9	23604	28593.4	12520.5	18301.1	14337.4	19114.3	20656.4	21153.4	18607.6	18626.9	16165.3	15539.9	19887.4	22694.1	17124.8	17158	18753.9	17609.4	38413.6
7	acceptor	18571.8	24551.9	15322	20870	21094.3	20844	21347.2	11253	19481.3	21929.6	13792	21474.9	15308.1	20302.7	21315.4	19540.8	20915.5	21458.3	26794.3	23596.2	18312.9	17554.5	12235.9	-1334.1	1939.55	400.855	-773.403	3567.9	9433.12	-2867.04	1614.01	-2336.87	2016.57	2085.06	3476.1	-239.588	-267.336	-187.488	-3255.89	858.158	-3068.27	5285.59	-82.68	2289.7	401.708	2680.51	568.649	2147.14
7	fret	0.302785	0.355482	0.262208	0.319599	0.319599	0.331813	0.380353	0.1973	0.35358	0.34978	0.26038	0.389023	0.252173	0.357386	0.358331	0.365017	0.402573	0.307448	0.423043	0.385165	0.30838
8	donor	96296.6	86634.7	78868.4	84288	96312.8	116577	112113	106858	131718	98556.9	135641	111367	109761	101273	106177	131348	127570	114505	100407	113512	110163	98216.6	125636	113358	117800	115931	118526	107063	113709	102802	97077.1	105219	121561	115977	94309.2	120840	106450	102413	99963.8	101338	109950	97528	113911	115232	97374.1	97860.2	104895	111980
8	acceptor	16529.4	9247.16	20243	17646.7	20339.2	20148.2	9732.15	2424.57	-366.721	2587.68	-135.38	43.588	3870.39	7740.62	-1134.38	1873.89	-533.976	3583.25	-115.917	-1993.23	1811.94	2267.65	-1321.18	-3643.11	173.551	-675.969	1236.24	1142.68	3586.68	-2579.93	-4034.84	2140.14	3296.2	-1134.41	-2555.24	1064.07	-1370.39	1666.89	2884.67	-871.818	-664.473	1195.72	-1203.01	-2032.56	2680.49	-1194.21	-2513.18	2395.92
8	fret	0.146254	0.0963534	0.204408	0.173382	0.174644	0.147449
9	donor	63247.1	61111.5	55694.7	58445.3	59511.2	63388.3	65888.7	70660.3	83827.5	92483.8	91302.3	89413.9	57383.1	34777	30814.6	37713.3	36276.9	31587.8	32618.6	18752.2	42134.3	39339.2	45250.6	42573.9	38700.6	39734.3	41572.4	36247.5	26142.6	34652	27667.1	32310.7	42366.4	48317.6	36126.2	31168	40695	24426.7	36885.2	27405.6	35323.7	31998	34166.8	29380.1	28565.3	38551.8	32667.9	76079.9
9	acceptor	28165	24540.5	25413.2	22808.1	23419.1	28702.6	25091	6838.27	-1327.04	1970.12	7103.53	-3292.55	-4576.96	1544.33	196.055	3211.54	1597.01	1951.37	769.333	-2433	-3360.83	1572.7	-1919.19	-4753.34	-1225.55	-3095.37	-3758.73	1397.71	-4086.27	-2959.12	-250.776	-759.005	-1640.57	1930.83	-2035.15	-1918.94	-2156.93	2754.48	-4496.97	2663.79	2932.69	2706.52	2739.01	-126.635	-4981.18	1668.27	2285.05	-1496
9	fret	0.307969	0.28619	0.313264	0.281032	0.282748	0.311496	0.275899
10	donor	56529.9	53300.9	67339.9	58659.3	51450.9	71574.2	61870.2	62024.2	61905.2	58351.4	68346.4	57077.1	61149.7	70107.1	73015.3	58985.3	64653	65448.6	63436.9	61280.3	72351.7	53003.3	65167.8	69717.7	68148.5	66715.1	82263.9	66620.6	69509.4	65893.6	62055.2	64235.1	67059.2	66138.1	86861.7	84800.8	100685	97339.2	99828.3	64871.6	5587.16	9706.26	1118.77	4741.09	2979.09	3980.41	-5181.47	623.292
10	acceptor	23971.1	29154.3	22062.5	18343.3	27188.6	16337	20271.5	19613.8	14683.6	19115.6	23654.1	22082.1	25960	20405.9	23011	24264.7	21947	15899	18157	26624.4	17850.5	20622.4	20617.2	25183.9	24014.3	24755.8	18356.2	23070.9	19532.5	15712.6	25028.5	22858.3	22609	35737.5	7679.45	-1393.93	-1037.21	-1658.2	1825.32	-3307.14	-773.826	-6377.65	-1904.53	135.468	-2762.03	-4780.8	1488.4	6522.35
10	fret	0.297838	0.353913	0.246499	0.238182	0.345291	0.18605	0.246499	0.240028	0.191494	0.246499	0.256696	0.279066	0.297838	0.225292	0.240028	0.291254	0.25298	0.195129	0.222537	0.302549	0.197859	0.280002	0.240028	0.265065	0.260412	0.270657	0.182427	0.257624	0.219785	0.192403	0.287498	0.262272	0.252052	0.351036
11	donor	60029.8	51343.3	79659.4	81373.9	63045.6	78963.4	65887.8	64740.2	68279.6	84026.2	67479.4	61744.3	62013.5	78871.6	62130.1	63484.8	59428.1	58350	70339	64679.5	63514.6	56728.6	65810.9	64020.7	75158.6	54615.9	68502.9	67967	67082.4	59127.9	93989.3	52657	54851.6	75050.7	48223.2	57925.8	63004.7	56848.9	58129.2	60213.4	64813.4	70673.9	57830.2	50559.2	60354.8	49008.5	52798.5	67256.1
11	acceptor	8853.49	10057.2	13924.4	13334.9	18284.6	14208.3	19551.7	16146.6	10408	16479.3	10106.6	18312.2	16748.3	7422.2	14149.5	12619.2	8469.68	11739.3	20178.2	17951.7	14440.1	13606.9	13628.2	14701.2	14331.1	10820.5	22631.1	18320.4	15194.1	22263.2	11820.3	13078.8	12636.5	14199.8	15180.2	20647.7	10021.5	9745.65	16337.3	11338.2	11179.1	13063.2	15050.1	16566.2	13317	12346.9	16945.9	14733.9
11	fret	0.128527	0.163808	0.148911	0.140938	0.224993	0.152265	0.228784	0.199797	0.132418	0.163808	0.13047	0.228784	0.212999	0.0861413	0.185434	0.165867	0.124661	0.167245	0.222729	0.217478	0.185434	0.193293	0.171395	0.186855	0.16039	0.16518	0.248079	0.212258	0.184724	0.273637	0.111955	0.199071	0.187567	0.159028	0.239518	0.263134	0.136991	0.146242	0.219723	0.158348	0.146908	0.156314	0.20637	0.246514	0.180484	0.201252	0.242618	0.17978
12	donor	14767.2	34663.6	33795.2	43801.1	31873.8	35386.4	31604.1	50565.2	39042.5	49917.9	40068.4	49591	45149.6	36016.4	36824.4	54421.9	48929.7	48852.1	49978.3	39613.2	38429.7	35521.2	51778.9	37582.8	34154.4	44326.5	54507.2	39691.9	47912.4	45849.7	45761.3	48460.4	36108.1	53494.2	61169.9	57477.1	47279.2	39463.2	59015.5	42768.7	51991.4	48466.9	50944.9	57200.9	44106.4	41703.9	49347.2	46562.8
12	acceptor	15883	16479.4	14980.8	14797.5	12514.4	11036.5	2348.5	-1841.99	2816.53	-1047.85	352.098	-906.192	2231.45	-3585.87	3069.4	782.813	-1051.95	-754.259	1371.05	3161.02	3276.96	1456.95	2240.22	2276.19	108.411	-1724.48	-3992.73	1530.01	1127	1524.51	1772.09	3644.44	848.551	-3497.96	-1542.81	-3208.32	1064.6	-97.915	2308.1	1573.39	374.142	-2930.09	4012.26	1728.75	-3081.04	-176.179	-822.501	4154.51
12	fret	0.517731	0.321912	0.307242	0.252618
13	donor	25003.4	19285	24370.2	19447.5	39543.3	18447.9	11229	26371.7	18236.9	14340.5	32729.4	15503.8	17308.9	29076.9	73736.1	87760.4	80633.6	78851.6	82784.4	83557.1	86935.5	84156.4	75736.5	88049.1	96806.3	82183.9	85062.6	96686.2	88920.1	98013.3	90823.4	81043.6	109279	79478.8	88804.9	100785	91734.4	111845	98769	88356	97375.2	88206.8	79124.6	55440.6	60416.6	70544.5	73400.1	75872.3
13	acceptor	65091.7	64990.3	58171.8	64996.2	61633.4	65835	63518.5	60886.1	66341.5	67518.7	66515.6	71981.7	66015.2	70533.5	23727.6	1210.96	1900.82	-1908.5	5237.61	3905.79	3452.89	8351.54	7987.18	1934.88	6037.75	6261.04	1665.51	531.526	3572.18	-191.933	1758.75	5653.17	5892.19	4128.82	3791.76	4603.31	6835.33	2855.23	2863.45	4473.52	643.386	5778.64	1801.9	1537.6	7622.91	7373.11	2182.18	2891.53
13	fret	0.722853	0.771656	0.705238	0.770089	0.609249	0.781115	0.850266	0.698004	0.784291	0.824962	0.66967	0.8233	0.792279	0.708149
14	donor	63939.1	53011.9	50599.2	61471.7	54783.8	57753.8	58697	62803.8	75873.8	75437.9	63087.2	55365.8	60365	60570.6	61695.5	60255.4	64022.5	58797.8	50469	65544.4	78825.5	76825.7	56222.4	76806.6	70275.2	63367.5	33843.9	52271.9	66428	62397.3	57711.7	64414.6	57460.9	53403.3	45111.8	46135.9	50401.5	45556.3	30223	42514.9	70191.9	77493.4	77055.1	79352.7	79690.9	65432.4	71162	74223.3
14	acceptor	14360.9	15415.8	13587	18794.3	20226.6	19333.7	18789	18175.8	13111.8	14740.7	16552.3	15097.6	19408.3	13182.8	16910.8	21034.5	17527.8	21167.4	34180.5	20503.9	13322.5	6174.74	26781.4	12253.8	9984.76	13955.4	47762.3	31014.5	17899.5	18173.4	24104.8	21156.4	21276.1	29781.6	41005.6	28821	38397.6	42494.2	50969.2	46315.9	18698.6	11109.9	21854.3	24362	22333.4	26606.8	17585.9	19215.7
14	fret	0.183119	0.224883	0.211378	0.234247	0.269723	0.250573	0.242815	0.224035	0.147414	0.163525	0.208022	0.2139	0.243675	0.179013	0.214742	0.258375	0.214742	0.264474	0.40391	0.238524	0.144215	0.0742375	0.322425	0.137841	0.124397	0.180654	0.585158	0.372453	0.212218	0.225732	0.294486	0.24712	0.2706	0.358379	0.476012	0.384763	0.43213	0.483099	0.628185	0.521231	0.210538	0.125184	0.220641	0.235101	0.218951	0.289142	0.198006	0.205511
15	donor	41834	69045.6	59864.4	56684.2	66324	47557.6	11073.7	50153.2	68753.6	65321.8	68225.8	53396.5	54883.6	8264.8	5948.82	573.577	2939.07	1049.04	-54.3696	-3371.91	-1347.96	-1825.11	-3879.44	-1086.32	-2804.17	-3151.34	-2862.12	1336	-693.57	-2226.86	-32.9884	238.784	-4862.44	1113.18	345.13	2289.74	-775.72	205.586	-140.459	-888.256	564.011	701.867	5029.97	3350.95	-2799.67	3248.54	2146.26	3572.08
15	acceptor	53167.7	20851.4	32916.7	25011.5	23109.6	26939.8	59217.5	46974.1	28718.2	21661.4	23017.1	39526.7	33776	89182.7	87621.6	97258.2	38596	-621.831	-609.099	9223.8	-1.571	-2029.98	1704.97	2060.85	-564.749	-4412.98	-684.94	-888.623	639.276	2900.01	1199.45	-5680.65	-2935.14	1055.43	287.771	-3399.51	-1709.46	-1467.68	-3812.34	-2308.06	-3658.88	-0.977	-1081.1	3413.65	3971.04	-2823.23	3588.36	522.749
15	fret	0.559303	0.231836	0.355038	0.30598	0.258688	0.361152	0.84239	0.483431	0.294697	0.249403	0.252499	0.425047	0.380473	0.914941	0.936766	0.994358
16	donor	14583.4	14069.8	17287.6	16905.4	19300.4	13427.9	17073.2	12658.1	18876.3	15392.2	11334.8	10377	11254	12049.4	15537.9	15531.1	12920.2	10220.7	8565.18	16263.4	17016	19060.5	12634.1	10731.9	16982.3	12853.8	15988.9	19825	13925.6	10994.4	11184.3	15575.8	13310.1	14514.6	14297.3	17630.5	16382.7	15008	12851.9	15515.3	10602.5	15706.6	13896.3	16738.5	13991.5	14286.7	15215.2	12104.2
16	acceptor	13504.4	13191.5	8421.12	11705	7164.98	14624	10743.1	15313.5	14894.3	15837.2	9916.02	13925.9	17049.6	10934.3	12742.2	11982.4	14972.1	15113.3	14650.8	7155.9	10349.9	8041.43	13387	8097.16	7405.39	15096.6	11590.9	15985.1	13470.5	13381.1	22640.2	14462.3	11097.5	17146.4	18808.8	18387.9	7870.38	15044.2	12340.3	11481.1	18609.8	11481.2	13346.6	14351.8	12790.3	15712	14102.4	8384.3
16	fret	0.480979	0.48402	0.327973	0.409111	0.270811	0.521264	0.386162	0.54715	0.441156	0.507228	0.466747	0.572806	0.602125	0.475904	0.450403	0.436011	0.537222	0.596285	0.631144	0.305454	0.377763	0.296831	0.514254	0.429825	0.303301	0.540204	0.420522	0.446292	0.492114	0.549132	0.66938	0.480979	0.454491	0.541197	0.56789	0.510241	0.324766	0.500184	0.490092	0.425694	0.636913	0.422592	0.490092	0.461646	0.477935	0.523263	0.480979	0.409111
17	donor	34661.6	34800	39422.6	36474	30335.4	38807.9	39600.9	34198.1	42113.8	42365.1	50772.2	46906.5	31678.4	40284.1	49909.2	37373.9	64203.6	61277.6	56400.7	55583.6	55871	59490	55286.4	57327.6	57925.8	64624.2	60730.6	62823	46556.6	57749	56995.1	73873.1	55632.5	66227.5	59442.6	60176.1	59049.8	66557.8	65669.2	64740.8	65154.6	69483.8	89768.6	62929.1	60754.7	63357.2	67607.4	64685.9
17	acceptor	20980.9	28520.5	22438.3	36242.6	28821.8	23900.9	23668.7	15581.1	21830.9	29168.2	21577.4	20470.1	27802.5	17496	10699.7	10862.7	1748.21	-3665.97	-3259.65	-258.97	978.954	1492.3	-2701.89	2491.58	-2239.58	-384.652	-1179.79	890.082	2054.88	1058.03	4402.15	1696.68	3968.38	2741.51	293.3	-1371.93	2882.78	-1019.57	4469.67	-2070.46	5012.42	1694.4	-857.665	412.986	-4358.61	-791.214	505.607	39.67
17	fret	0.37695	0.450257	0.362517	0.498191	0.487135	0.380812	0.374058	0.313051	0.341481	0.407994	0.298008	0.303639	0.467141	0.3027
18	donor	113494	114895	129361	121117	132264	146738	154423	151784	168504	149342	153368	155348	153870	164528	159282	65752.8	923.986	-3292.79	-9918.4	6679.65	17890	5208.83	1748.2	8185.56	6466.95	-358.595	459.236	-100.165	-8791.09	-4473.28	4413.33	5463	1492.96	352.886	3243.48	-4497.74	8130.26	4654.74	126.361	-495.787	4650.49	-5331.52	1052.67	-4617.91	-7518.08	7014.65	834.652	-12.9577
18	acceptor	33321.3	40472.2	29338.1	38198.5	16464.6	822.241	4917.33	-3360.8	-1214.07	-2069.44	-1220.95	-2919.12	-3151.47	864.796	-2548.58	967.491	4043.02	2983.8	2131.85	-665.399	-3466.33	-94.994	4209.9	-261.959	-946.399	720.231	-132.684	-5058.27	1132.75	-1295.35	1994.19	3944.64	-344.704	-259.184	2285.69	-717.549	1670.86	1167.24	110.271	-523.254	-2138.62	-4140.11	3060.79	-4318.59	-1922.15	-1315.42	1017.96	-463.144
18	fret	0.226651	0.260239	0.184583	0.239393
19	donor	27339.6	25979.6	28469.8	24737.9	23294.9	25704.9	28746.5	26931.9	28074.8	25270.8	33877.4	30709.7	27386.5	28053.3	25707.8	29142.4	24366.4	25789.9	29209.9	28838.4	27106.9	29641.1	29691.9	30946.3	29932.4	26550.6	30117.2	25691.2	27026.7	32472.4	25185.7	30381.2	28977.2	28917.6	25383.2	31248.4	24686.1	32240.7	27307.3	28258.6	28672.2	29325.3	30102.5	26603.4	37016.7	29420.1	28856.9	34610.7
19	acceptor	15470.5	20211.8	21664.9	17409	15747.9	24954.7	19183.7	22038.9	23564.5	23552.8	12934.1	19426.6	20058.9	19133	22302.7	23764.2	21662.3	18097	22675.7	23602.7	22232.7	17121.9	20501.4	21456.4	24094	20653.3	21534.6	24467.5	19228.4	18725.4	20932	20350	21342	15006.2	21470.5	21965.7	20713.4	26979.9	24462.1	20408.3	32781.4	22475.3	20962.9	19251.7	27233.8	26240	24231.2	21743
19	fret	0.361311	0.43709	0.431956	0.413405	0.403053	0.493033	0.399941	0.450401	0.456526	0.481922	0.276197	0.387462	0.422694	0.405126	0.464675	0.449379	0.470773	0.412371	0.43709	0.450401	0.450401	0.366558	0.408233	0.409268	0.446318	0.43709	0.416504	0.487988	0.415471	0.365509	0.453465	0.400978	0.423724	0.341295	0.458565	0.412371	0.456526	0.455506	0.472803	0.4196	0.533115	0.434011	0.410303	0.4196	0.423724	0.471788	0.456526	0.385384
20	donor	45472.4	45045.1	46566.9	55277.2	47598.5	65587.6	42929.3	42289.2	49076	51423.4	50601.2	45904.8	27193.9	36348.5	53712.9	56371.7	46080.1	47932.1	56319	47527	51520.4	55016.8	49532.2	49253	52502.6	67960.5	59442.6	56256	49338.1	61013.7	58931.9	50495.7	79173	79101.6	81881.3	80269.3	78109.2	84921.5	92011.2	81353.6	74750.7	71067	67649	69967.4	78378.1	65953.6	82332.4	-360.018
20	acceptor	18583.1	30287.1	26036.8	24788.9	25825.3	15657.7	22509.6	22170.3	22738.2	23666.8	18506.4	29700.6	60565.5	37188.3	22610.5	27817.5	23061.6	28991.8	30878.4	28077.5	36285.3	15222.7	25056.3	27052.8	21899.3	19032.6	24343.3	22338	31104.1	16780.6	20506.3	27827.7	1084.38	-177.345	5410.21	3283.82	318.383	5510.98	4633.77	-649.443	4429.9	2795.74	3460.02	4522.29	6319.48	3812.11	2426.24	3952.28
20	fret	0.290512	0.402457	0.358435	0.309814	0.351812	0.192415	0.344287	0.344287	0.31629	0.315363	0.267778	0.392804	0.690621	0.505638	0.296	0.330239	0.333976	0.376501	0.353708	0.371731	0.413127	0.216917	0.335846	0.354653	0.294167	0.218679	0.290512	0.28412	0.387035	0.216037	0.257859	0.355598
21	donor	41214.9	37585.3	34463.6	43199.7	37453.2	38440.9	50383.9	37569.7	41314.1	45584.5	40189.7	63098.8	57811.8	52927.3	57278.9	53779	56903.1	63924.7	60665.5	62621.4	70218.1	61181.2	51380.9	53997.8	63450.4	59067.6	56017.8	65301.6	62022	57071.1	55901.3	59022.2	55841.2	61984.5	72077.9	59913.8	55989.6	60085.7	55559.1	61064	48636.6	61134.4	58186.9	49368.8	45304.8	57704	50557.3	52233.4
21	acceptor	18306.2	16784.2	18663.2	13389.4	14766.4	19171	16340.6	13645.6	12783.6	17151.1	19174.8	-3216.63	-150.484	-844.82	1533.86	2071.12	239.639	3540.34	3756.18	4805.16	4250.44	1444.14	-150.431	3811.89	2207.41	2134.73	1070.93	-944.555	871.018	6632.07	-55.705	-94.633	1500.42	2617.59	1876.82	-5152.24	2431.91	483.471	-2028.7	6396.28	-1829.71	3708.57	-2867.45	5165.55	4150.88	512.759	240.946	5195.91
21	fret	0.307428	0.308318	0.350929	0.236584	0.282758	0.332614	0.244999	0.266295	0.236584	0.273205
22	donor	38063.2	19725.1	14585.6	27632.4	23689.1	25285.3	27190.9	26289	31114.4	25455.1	43662.1	33643.5	30962.5	31870	29921	34862.4	27489	22456.1	39357.5	37767.9	37256.6	35706.7	31432.3	31753	43188.5	38967.9	33656.7	46301.6	44810.2	41657.4	39739.6	39865	34402	38712.2	39357.5	44742.2	41815	42154.6	36175.5	42989.5	37220.8	44405.5	61518.2	49985.5	53631.6	52626.9	55701.3	56920.2
22	acceptor	19596.7	15330.9	17667.1	19907.8	20576.1	21097.1	16962.6	20424.9	16857.5	13892.6	16483.5	22609.8	18135.3	17952.1	18350.9	21463.3	18572.5	21235.1	16907.9	22123.5	22840.2	17706.6	27493.1	20178.2	26790.7	22068.7	24242.8	21324.7	22343.1	17403	22236.3	23143.8	27130.9	21366.4	23348.3	16003.2	26587.1	21735.4	26319.9	21715.6	23290.6	23814.4	-1587.73	4713.11	1617.73	1399.43	3429.44	1271.56
22	fret	0.340145	0.437287	0.548136	0.418661	0.465199	0.455166	0.384047	0.437287	0.351219	0.353073	0.273823	0.402206	0.368941	0.360517	0.380255	0.381202	0.403169	0.486505	0.30031	0.368941	0.380255	0.331899	0.466206	0.388802	0.383098	0.36145	0.418661	0.315559	0.332813	0.294969	0.358652	0.367064	0.44124	0.35586	0.372702	0.263376	0.388802	0.340145	0.421585	0.335558	0.384997
23	donor	11132.4	11041.9	10890.3	9467.38	12049.8	11326	12275.3	7361.51	10353.8	13216.6	15124.9	10607.7	10928.6	9888.33	11428.6	8742.12	10910.2	9902.68	12478.1	11144.6	11285.5	10625.7	14087.9	9227.83	11999	12878.8	11838.6	11953.4	12190.7	10117.2	11685.5	12991	14131.7	9929.54	15868.2	5679.16	9518.16	6302.13	11029.4	12216.8	12108.6	9119.65	9571.14	10446.9	8129.45	11497.4	10118.7	12566.4
23	acceptor	12965	14320.1	10901.2	10242.4	12308	4056.62	4945.42	7614.85	5419.44	7410.16	8072.75	8292.95	5644.49	9503.77	13296.4	11316.5	3129.83	7509.53	11571.1	8134.31	6447.87	8017.18	5799.72	11814.4	4393.51	6234.42	11833.8	9191.4	7786.16	8838.17	7638.25	3155.03	8623	7327.78	2559.6	12795.5	7456.12	10575.4	5799.61	12605.4	5981.08	8705.89	6292.05	9134.97	2193.72	8564.29	8946.32	4521.72
23	fret	0.537547	0.564221	0.500284	0.519647	0.505706	0.263267	0.286803	0.508943	0.343926	0.359281	0.347788	0.43835	0.340048	0.49047	0.537547	0.564221	0.223253	0.431328	0.481596	0.421881	0.363081	0.430153	0.29226	0.561185	0.267461	0.325695	0.500284	0.434846	0.389263	0.465904	0.395391	0.195173	0.379375	0.424252	0.138204	0.693001	0.439515	0.626484	0.345215	0.507865	0.330939	0.488267	0.396612	0.467034	0.212997	0.426617	0.46929	0.264667
24	donor	48245	55439.3	40153.8	51494.6	48009.7	44953	56492.5	50327.7	66314.3	55922.9	53213.3	60427.3	49738.3	46502.6	16934.4	20220.5	43224.4	42577.6	33111.9	33547	46817.1	33824.9	51060.4	31112.3	40791.7	37745.9	51193	42417.4	48806.7	46670.7	41913.1	51870.4	47061.3	43044.4	54119.1	38587.4	48212.4	41378.1	52062.2	53772	56499.4	53067.9	14218.9	3931.33	1218.77	2931.55	-3422.14	-2915.83
24	acceptor	8124.95	14328.1	3435.89	8274.82	10003	12910.9	5988.67	8273.95	4319.2	12206.5	6177.19	8820.7	13369.4	11588.2	46964.1	40221.8	17201.3	17632.2	16502.1	11986.9	11551.9	20747.9	15914.7	14757.3	21486.1	14826.6	11195.7	17223.2	15129.5	10789.7	20014.9	17330.7	16980.2	19641.1	16623.4	18043	21541.2	13334.5	14344.3	14889.1	10797.3	19023.2	11122.5	872.853	627.81	7222.21	5680.86	5480.07
24	fret	0.143977	0.205174	0.0789889	0.138804	0.172546	0.222723	0.0956785	0.141021	0.0612561	0.179443	0.104142	0.127106	0.211518	0.199649	0.734758	0.665732	0.285068	0.292823	0.332526	0.263001	0.198078	0.380427	0.237325	0.321784	0.345203	0.281641	0.179443	0.288507	0.236508	0.187942	0.323566	0.250482	0.265522	0.312919	0.234876	0.318229	0.308516	0.243887	0.216304	0.217104
25	donor	77665.1	75627.5	93479.3	81419.8	106739	88925.6	77305.2	84825.9	77439.6	79317.3	69451.5	69803.1	72408.9	73928.2	78331.8	86033.9	86857.5	64912.8	86676	84914	99759.8	71889.2	89313.1	80936	77880.1	69862.1	78653.6	71456.9	74883.2	65193.5	84232.4	103878	79868.3	85205.9	59029.4	88833	94879.2	98903.5	90095.6	97070.5	97661.8	84336.9	99074.4	89082.4	97344.5	93458.4	97385.6	86089.2
25	acceptor	1562.45	9850.55	11075.2	9692.57	15601.4	13429.3	14192.8	21097.9	12771.6	14216.6	12388.5	33106.1	16883.6	22767.9	22334.3	15916.8	19770.9	16765.7	23218.6	16522.7	12399.1	21324.7	16629.2	18131.3	19143.6	18269.3	19317.9	16590.3	23820.3	28627.6	11243.4	13552.3	25485	8487.08	9344.09	7313.13	7774.39	7686.35	5979.34	2536.87	10380.2	13117	6016.2	8385.18	6797.39	6336.98	11889.4	10778.2
25	fret	0.0193424	0.1154	0.105547	0.106366	0.127796	0.131116	0.155382	0.198891	0.141952	0.152015	0.151174	0.321329	0.189415	0.23554	0.221493	0.156225	0.185125	0.204948	0.211026	0.162982	0.110467	0.228506	0.157068	0.183412	0.197165	0.20755	0.197165	0.188557	0.241729	0.30476	0.117872	0.1154	0.241729	0.0908732	0.136942	0.0763239	0.0755192	0.0723043	0.0618977	0.0255794	0.0957506	0.134443	0.057116	0.0860096	0.0650929	0.0634946	0.108825	0.111288
26	donor	34467.9	29060.1	30351.4	36802.4	33387.2	36758.8	33708.2	32397.3	32050.4	33031.5	37447	32085.8	35545.9	34830	40249.3	52206.5	51328.7	49715.1	53541.4	52720.6	55875.5	52558.2	52204.9	55471.2	56811.1	55918.7	55043.9	56745.9	60549.9	56546.8	54425.3	55518.4	58279.9	62016	53448.9	56417.9	53426.3	60524.9	58745.9	56362.5	59949.8	57627.1	55256.2	55658.2	58881.6	56880.6	60301.1	53963.2
26	acceptor	23533.8	16039.5	23858.9	24268.7	26351.2	25156.4	19314.3	22183.6	22365.7	29302.4	28929.6	33315	32351.4	32445.9	25569	3252.17	3792.21	1892.39	3145.11	-1983.15	1660.05	2569.71	7388.07	217.293	-2094.26	6672.75	-2847.73	237.442	1608.35	3200.64	2737.79	-551.35	3757	-2794.19	177.886	3830.5	646.47	3227.38	-435.319	960.935	4433.42	6423.46	-1400.25	1294.73	3782.82	6908.73	8509.74	4563.95
26	fret	0.406005	0.355636	0.439885	0.397953	0.440997	0.406005	0.363986	0.406005	0.410581	0.470616	0.435425	0.508922	0.476016	0.482462
27	donor	17590.8	23939.5	18969.4	27221.1	33463.2	24021.6	22994.8	28888.9	22166.4	30799.2	25993.3	24456.6	19715.6	31037	25835.2	29538.3	29954.9	23649.1	30030.9	28667.1	44590.9	44421.8	36607.6	43950.1	35149.3	45034.5	44211.1	41710.1	42721	39864.6	42083.8	42647.5	49566	42040.9	47203.5	47557.6	39579.1	45204.9	47906.8	44044.4	43134	42332.5	40764.1	51796.2	42044.6	38672.3	46289.3	53662.5
27	acceptor	19639.9	12236.1	20480.2	12654.4	15589.7	16535.1	16144.7	6252.52	13828.1	2883.14	12309	15255.6	12372.5	16154	12280.7	10219.3	16445.1	17665.6	13436.1	3477.14	4300.81	4189.65	2343.95	-3467.9	-1133.97	-2799.77	-1482.03	-4899.3	-4814.2	-2562.27	-3353.55	2416.03	2533.47	-2894.37	-3479.27	2.772	-3690.95	-6796.96	-3825.63	-4169.89	4.734	-181.289	-1587.13	547.239	-875.962	524.969	-196.323	-449.812
27	fret	0.527034	0.338404	0.519005	0.317818	0.317818	0.4074	0.412351	0.178026	0.38368	0.0851934	0.321735	0.38368	0.385654	0.342331	0.321735	0.257337	0.354124	0.42722	0.30901	0.108064	0.0880487	0.086145	0.0604897	-0.0852346	-0.0328895	-0.0665794	-0.0347648	-0.133538	-0.127052	-0.0684465	-0.0861662	0.0538515	0.0481657	-0.0740464	-0.0796425	0	-0.102917	-0.176945	-0.0870977	-0.104776	0	-0.00470672	-0.0403885	0.0103645	-0.0216282	0.0131935	-0.00470672	-0.00847013
28	donor	161526	137190	153214	162416	223616	199365	188891	110807	159187	126413	157400	161944	171734	135227	176568	186479	254725	236932	134694	143872	119331	239628	133713	122850	186625	170631	166045	167117	142073	183493	118488	158860	150506	188757	106845	105306	157848	154171	135754	116847	119755	118646	126546	159617	171243	144805	139438	94740.4
28	acceptor	119155	51592.8	167092	77280.3	69907.9	74452.4	82693.6	107260	60416.7	67219.4	58174.5	68426.6	72015.5	67150.5	102481	90501.5	51631.2	44342.8	80306.8	72050	75193.3	63548.3	88916.2	70083	44119.8	66400.6	54021.5	16531.1	66462.3	98350.5	97589.8	83713.6	73608.4	54811.9	97835.3	68192.6	63702.6	53879.3	77999.2	67379.9	93573	49186.8	63570.1	60884.3	62888.3	67225.1	78499.3	65739.5
28	fret	0.424201	0.273342	0.521664	0.322151	0.238211	0.271642	0.30444	0.492046	0.275046	0.347445	0.269943	0.297458	0.295716	0.332015	0.366822	0.326623	0.168401	0.157741	0.37336	0.333819	0.386559	0.209849	0.398961	0.363104	0.190861	0.280175	0.245637	0.0898191	0.318587	0.349275	0.45203	0.344706	0.328418	0.225145	0.477523	0.393219	0.287916	0.258975	0.364961	0.365891	0.439033	0.293109	0.334722	0.275899	0.268248	0.31681	0.360324	0.409568
29	donor	37226.2	28849.4	34086.7	27328.1	31073.3	28720.4	22984.3	41562	38272.6	46530.5	31903.8	36099.7	34156.7	45629.9	35810.9	44951.3	43559	45967.8	41375.1	35177.2	36527.5	30509.5	36571.5	46577.5	35535	35173.2	28387.6	28116.7	40814.4	35423.1	47847.8	39660.9	47045.2	35030.3	36132.7	39427.1	46596.5	49011.2	37928.8	31825.9	29520	41846.8	33866.9	36251.7	43207.2	47985.8	35519	37686.9
29	acceptor	10328.4	18362	14539	17957.4	8426.12	7579.61	22848.7	4061.28	-1754.79	-1366.74	3481.06	4215.4	5232.89	-447.288	-3389.61	1675.7	3.151	-1036.52	72.956	1473.58	-2781.06	-3618.16	-561.072	-178.424	272.221	1622.4	3463.29	-91.993	-3004.17	1490.74	556.482	1763.16	-1649.97	1372.53	4107.56	-4050.34	-2118.05	-39.039	-4739.14	1611.14	-283.102	112.013	-1000.97	2934.86	2088.41	-1610.16	-4136.38	5342.29
29	fret	0.217129	0.388722	0.299401	0.396353	0.213105
30	donor	54369	47905.9	49915.1	49230.3	48620.7	49967.1	48509.9	53714.7	60876.2	55791.8	62385.5	51162	50974.3	54297.7	51745.1	52790.1	50481.8	54539.2	55855.1	48718.5	49364.3	56598.8	64108.6	55176.5	51130.9	59438.1	51403.5	53140.7	50934.7	54238.4	54884.7	53777.5	50347.7	51117.9	54317	47405.4	52459.9	52687.2	49884.6	55205.9	51808.4	65554	53621.4	58546.3	52188.4	52679.3	58300.4	63385.3
30	acceptor	21343.5	21404.5	28611.2	25889.6	24290.3	23247.9	19252.1	23639	16372.8	24556.4	21881.3	24810	21770.6	22006.9	22909.9	20470.2	26729.1	24846	18239.5	25515.2	27417.3	29745.5	20161.7	27905.5	21950.9	22930.8	27763	28122.5	31337.1	24390.6	22152.6	20152.1	26166.4	30170.7	23981.7	26341.5	26297.7	24323.6	23563.1	22881.7	25799	19947.2	27492.8	18153	24102.5	29119.1	26663.2	20771.5
30	fret	0.281449	0.309112	0.364052	0.344688	0.333115	0.317733	0.284302	0.305285	0.211726	0.305285	0.259643	0.32638	0.299551	0.288109	0.307198	0.279549	0.34662	0.312943	0.246434	0.343723	0.357264	0.344688	0.238903	0.336005	0.300506	0.278599	0.350487	0.345654	0.380585	0.31007	0.287157	0.272903	0.341792	0.370851	0.306242	0.357264	0.334078	0.315818	0.320612	0.292873	0.332152	0.233265	0.338898	0.237023	0.315818	0.356295	0.313901	0.246434
31	donor	51753.2	54908	36373.8	39804.4	46890.7	41876.4	47583.9	58012.2	41195.8	54138.9	55710	41927	48520	42430.4	51985.9	49000.6	47212	48378.3	44831.3	51748.1	43943.3	48408.6	42999.7	45509.3	39589.3	44540.4	48793.2	54098.4	39240.2	43303.3	55198.9	43419.6	47776.2	43551.2	54543.7	45542.2	44644.1	40204.1	43303.3	45873.7	41347.6	49653.4	45858.5	51636.8	53913.7	61134.1	47551	52147.9
31	acceptor	29031.5	25655.7	33420.8	15154.3	22290.2	28611.4	24074.8	21897.2	27442.5	34176.7	26524.7	37577.8	28761.4	32845.4	27014.7	22407.9	26768	29527.2	28901.1	25311.2	29965.4	36100.3	24436.9	24828.6	24770.9	24305.1	29749.1	34759.2	37930.9	19847.1	31079.9	26141.4	19464.1	22734.7	17204.7	20008.8	28606.3	32744.2	22802.7	25756	33162.5	23635.6	34796.3	18498.7	27622.4	27992.3	22651	24635.4
31	fret	0.359263	0.318855	0.479302	0.275566	0.322581	0.406276	0.335675	0.273744	0.399495	0.38696	0.322581	0.472287	0.372589	0.436565	0.342253	0.314206	0.362111	0.379283	0.391773	0.328182	0.405306	0.426748	0.362111	0.352623	0.385039	0.352623	0.378326	0.390809	0.491381	0.314206	0.360212	0.375455	0.289284	0.343194	0.239423	0.304941	0.390809	0.448407	0.345078	0.359263	0.44544	0.322581	0.431651	0.263752	0.338491	0.314206	0.322581	0.320717
32	donor	17158.2	12463.3	7026.26	9714.2	17847.9	6605.01	6752.33	11941.6	6823.27	4297.94	-64.1033	3195.7	3777.37	6001.5	17146.1	20746.4	11695	10973.6	6130.28	8547.57	9784.05	12043.1	14522.6	5952.39	13682.3	19469.6	7385.31	9955.38	8495.19	17315.3	15010.4	25700	34582.3	19850.5	30026	38838.5	44594.2	49028.2	46700.4	33620.8	36507.4	26308.9	30471.3	9477.38	1216.02	28641.1	3603.85	-5642.98
32	acceptor	66738.5	61793.8	60974.1	78753.3	71772.3	60400.9	61024.6	65739.5	75941.6	67294.8	69934.6	72707.4	57606.9	47075.5	68367.3	55619.1	56404.2	62434.4	61654	68116.3	62022.8	63609.9	53188.8	59141.8	56221.9	68185.4	69785.9	61898.9	62766.1	53368.8	55433.6	53022.1	32620.6	31841.2	38176.4	40061.9	37092.7	37051.3	45197.3	36696.7	35295	36264.3	39102.3	56636.3	48149.9	45664.9	23791	-2834.13
32	fret	0.795014	0.8327	0.896725	0.889666	0.800689	0.901442	0.900262	0.846538	0.918017	0.939478	1.0012	0.957493	0.938281	0.887317	0.799553	0.727849	0.828103	0.850009	0.909717	0.888491	0.863938	0.840764	0.785941	0.908533	0.8041	0.77806	0.903804	0.861612	0.880282	0.754508	0.787071	0.673175	0.485535	0.616464	0.559957	0.507731	0.453603	0.430905	0.491569	0.521948	0.491569	0.579695	0.562027	0.856965	0.975629
33	donor	180596	172863	167682	173738	162093	159139	176109	164344	173280	150572	169829	151384	154297	148745	143528	186662	172195	161060	169441	186011	181172	148723	147046	141222	157466	181160	173314	179668	187804	170255	165491	170349	169701	164286	165007	171036	178389	174184	172176	166711	163060	161573	159153	165759	163831	181784	186110	165894
33	acceptor	28701.9	20232.6	24068.3	17826.8	24489.4	33754.7	12918.8	28814	27181.6	41444.3	31000.3	19989.1	39884.7	35474.3	36080.8	35132.9	37101.3	17116.9	28175.4	17842.4	27533.5	48675.2	63619.4	49040	40563	10110.5	18079.5	22065.9	16614	21656	13621.4	20101.2	19177.3	19891.2	22845.3	25403.8	19418	26205.9	21120.2	27757.5	19325.1	43428.8	42229.2	23042.2	29561.3	21048	17094.2	20151.7
33	fret	0.136784	0.105152	0.125617	0.0933031	0.131623	0.175011	0.0681307	0.148875	0.135923	0.215702	0.154077	0.117064	0.205015	0.192611	0.200577	0.158422	0.177642	0.0958367	0.142821	0.0874031	0.131623	0.246268	0.302174	0.258067	0.205015	0.0531684	0.0941473	0.1094	0.0815192	0.112804	0.0756514	0.105152	0.10176	0.1077	0.121338	0.129047	0.0983733	0.130764	0.1094	0.142821	0.106001	0.212134	0.209462	0.122193	0.153209	0.103455	0.0840372
34	donor	21913.2	13982.9	18727.2	22193.9	20269.8	22258.5	19371	14978.7	11927.4	14848.3	15788.9	15174.1	14513.6	15885.3	16409.3	12179.7	19648.3	13848.1	15283.3	15072.2	10350.2	19534.7	15088.4	12159	15147.9	15564	16311.3	14443.5	15449.8	17591.6	16395.4	13281.2	12793.4	13685.5	15927.6	14077	11056.4	12776.7	10434.3	16584.8	14441.8	9702.54	15037.7	16687.2	16062.4	12061	13801.9	13784.6
34	acceptor	47929.6	68098.9	58221	65341.4	62542.9	61410.6	67672.6	77815.8	54897.2	66596.1	71394.7	67973.5	65687.1	68882.9	59219.5	64837.1	65573.9	63693.1	61729.5	64709.3	61963.4	62954.1	68347.9	60910.8	66433.8	58485	63660.4	61342.1	66107.5	70243.5	59162.5	69270.9	69917.9	65944.8	63001.2	72256.9	69915.5	67190.9	70461.3	64924.5	59777.9	71281.8	66091.5	60263.9	60951.3	64983.1	64905.9	67256.5
34	fret	0.685906	0.829526	0.756793	0.746643	0.754951	0.733671	0.777899	0.838499	0.821438	0.817836	0.818737	0.817836	0.818737	0.812423	0.783379	0.842075	0.769659	0.821438	0.801567	0.81152	0.857206	0.763234	0.818737	0.834009	0.814229	0.789758	0.796123	0.809713	0.810617	0.799754	0.783379	0.839393	0.845632	0.827731	0.797939	0.836696	0.863418	0.840287	0.871384	0.796123	0.805191	0.880209	0.814229	0.783379	0.791578	0.843847	0.825036	0.829526
35	donor	41964.1	56934.4	48991.4	56533.4	47530.9	41768.4	49993.4	56174.8	47723.9	52295.6	54778.6	50256.2	52621.4	37954.9	52221.7	45049.3	53361.9	54833.4	45325.8	55631.4	60873.8	59312	50178.1	55088	49434.9	58657.7	48472.6	55089.3	46316.8	40734.9	52520.1	38019.3	55234.4	50896.8	44589.4	47617.2	47882.7	56144.7	53616.5	42176.2	52409.3	53166.2	52751.5	45940.4	55582.1	55735.4	48005.9	52691.2
35	acceptor	24226.5	18680.2	24827.8	19317.1	17159.5	24673.3	28890.7	20796.9	28392.3	15330.6	23397.9	17148.6	28351.8	21601.7	29255.3	28101.3	14840.1	25163.1	17596.6	27606.9	22818.7	29445.4	30660.4	27644.6	21273.9	25494.4	27371	35094.3	25983.5	20675.3	19029.7	29445.3	22962.4	22203.5	16846	25113.6	10976.3	23310.6	22303.6	21559.7	20365.5	32676.4	21005.6	23825.7	24137.5	32838.3	31746.9	23790.7
35	fret	0.366438	0.247189	0.336356	0.254306	0.265034	0.371183	0.366438	0.270422	0.373085	0.226885	0.299432	0.254306	0.350396	0.362651	0.358872	0.384534	0.217255	0.314112	0.279438	0.3317	0.272222	0.3317	0.379755	0.334492	0.301261	0.303091	0.360761	0.389325	0.359816	0.336356	0.265931	0.436939	0.293957	0.304007	0.274023	0.345695	0.186099	0.293046	0.293957	0.338222	0.279438	0.380709	0.284869	0.341959	0.303091	0.371183	0.39798	0.311351
36	donor	12892.8	13453.9	16416.3	24546.3	19463.2	16063.4	13194.5	10180.8	15251.9	12238.2	19246	24018.4	21605	21460.2	25650.4	23345.7	55736	56429.8	57446.4	44918.1	17357.5	4569.75	-5346.14	-4963.02	-456.071	-4938.88	-2899.6	-4124.38	1610.37	-2335.47	-4745.82	-2154.47	1272.5	-6839.41	2029.69	-631.04	-3677.9	2388.67	-1116.73	3037.26	-9509.18	-11678.2	7342.09	-1873.92	-3527.07	1486.68	-4489.4	-1382.2
36	acceptor	39538.3	40000.1	43563.5	31752.6	38093.8	30823.6	38099.7	28325.3	44141	40751.2	35118.1	49807.7	43240.2	58346.2	32237	45252.8	14288.2	1937.25	1837.2	10376.6	5251.39	2000.69	4105.86	6903.91	2983.69	68.077	-858.871	1822.04	-966.285	11392.9	7173.24	3783.36	5170.17	-1120.08	-1737.85	-1228.48	11915.3	5706.87	1603.63	1624.35	-987.887	10514.4	1381.64	5740.34	-7939.79	7282.41	2386.1	-1569.05
36	fret	0.75452	0.748865	0.72638	0.564382	0.662378	0.656942	0.743224	0.735348	0.743224	0.769288	0.646095	0.674381	0.666735	0.73086	0.557097
37	donor	53511.6	48033.6	49414.5	41883	38115.6	33804.1	51494.9	48814.6	50153.1	45581.2	45934.3	50207.8	48180	46729.8	47483.9	58672.2	52658	54474.7	49762	49462.6	48396.7	48142	41181.4	39874.2	49448.1	48371	46281.7	47062.7	50320.7	45766.7	43969	52522.8	50732.9	48173.3	48666	47148.7	44196.9	43114.3	50217.9	52110.5	52179.8	47890.6	28311.6	330.728	-1315.01	-2051.29	417.875	-1482.6
37	acceptor	17350.3	31655.6	23615.8	31165.8	28999.6	35473.4	23595.7	23169.7	23863.9	17162.2	26263.2	28296.9	23269.3	31464.6	28113.8	25552	21938.3	23696	31936.5	24450.5	26042	28862.7	31351	38550.1	31979.4	23040.6	26530.3	22721.2	32474.1	33547.1	30585.2	14604.4	25407.9	23800.9	26477.2	16624.3	33535.7	33607.8	20412.1	24086.5	23665.5	21533.1	10541.4	742.386	2657.66	-2626.19	-1909.43	-1521.58
37	fret	0.244787	0.39719	0.323501	0.426188	0.432367	0.511595	0.313901	0.321371	0.322436	0.273045	0.363717	0.360561	0.325631	0.402388	0.372119	0.3032	0.294614	0.3032	0.390941	0.330948	0.350017	0.375264	0.432367	0.491473	0.393025	0.322436	0.364769	0.325631	0.391983	0.423094	0.410687	0.217379	0.334134	0.330948	0.352128	0.26112	0.431338	0.438534	0.289235	0.316043	0.311764	0.310695
38	donor	10517.3	15502.2	12038.9	13432.4	21665.3	22082.9	16706.1	11155.1	16708.7	23799.1	27444.3	34644.9	34724.3	13678.3	23537.9	27877.2	22316	19367.6	18025.3	18112.4	11185.9	18081.7	8601.23	15458.6	22226.3	21921.5	21227.3	26291.6	18068.9	13716.7	14477.5	17935.7	15517.5	18555.6	6441.81	15589.2	9364.58	17756.4	16383.3	22956.4	70537.9	75428	63406.5	57983.6	77574.6	62617.5	57274	81757.7
38	acceptor	54161.7	52465.3	49869.8	51088	51086.7	52457.8	51458.3	46137.7	49942.4	53519.1	46677.1	50711.1	45935.4	47102.4	55868.4	50484.3	56806.5	51516.6	40078.6	63954.1	48172.7	58479.1	53899.5	45226.4	49367	59577.7	47997.1	51227.9	44025.7	46217.5	42497.1	48697.6	46075.6	48494.2	64814.3	41953.2	44951.5	47817.9	36120.7	45632.2	-1337.05	143.2	5197.49	4755.99	-5179.16	4385.56	2528.47	-2764.79
38	fret	0.8373	0.77245	0.805918	0.791422	0.701836	0.70328	0.755406	0.805918	0.749289	0.691736	0.629951	0.593688	0.56998	0.775584	0.70328	0.64465	0.717857	0.726722	0.690312	0.77873	0.810802	0.763113	0.862851	0.744729	0.688889	0.731189	0.693163	0.660988	0.709081	0.770887	0.746246	0.731189	0.747767	0.723757	0.908855	0.729698	0.827274	0.729698	0.687469	0.665123
39	donor	66248.4	71382.7	69621.3	78676.8	65656.7	37651.8	62512.5	43545.6	65379.4	37695.9	46378.7	74919.6	79492	50890.3	47889.9	93426.4	65398.8	61972.7	44776.8	65064.4	103666	106068	101612	97193.4	87344.7	100150	105455	105262	117645	94055	90713.8	89820.8	92819.2	88031.6	120990	99583.3	78731.2	85635.3	93422.5	103637	108369	92952.7	105984	94509.3	80986.3	78355.4	94355.7	88975.2
39	acceptor	20804.8	38640.8	34829.6	31372.2	43560.4	63421.4	19332.7	33068.6	29058.8	51933.6	60824	30418.9	28020	38986	45049.1	25989.1	37015.8	36327.6	61054.8	37163.2	1299.86	-1971.46	-2127.81	-1055.04	-916.483	-3371.91	-2337.73	-2734.55	-2299.83	1848.38	-2223.62	142.22	1246.46	3632.54	92.129	-3180.55	2252.72	-1697.17	-2803.32	-1100.89	-960.477	-2965.01	-1043.66	7.013	-1668.58	-2662.47	-1366.65	2740.09
39	fret	0.238557	0.351461	0.33371	0.285539	0.398937	0.627327	0.236604	0.431699	0.308123	0.579853	0.567766	0.288482	0.261044	0.433687	0.484523	0.218067	0.361335	0.36924	0.57683	0.363311
40	donor	65392.2	84792.3	98635.2	88748.2	99103.8	79608.9	83051.5	73755.9	92765.5	85785.4	74687.7	86884.6	78928.2	111853	97502.5	107016	98177.6	71128	93931.6	87649	81070.7	84407.3	65810.6	78705	78777.5	84479.8	81623.1	79687	85958.4	68433	86304.3	60694.2	75050.4	73549.5	60995.5	66005.9	76423	64153.5	80289.6	82861.8	72204.8	44491.2	74760.2	76595.9	81651	82387.5	77912.7	75937.5
40	acceptor	19381	21838.2	19887	15993.6	11670.4	20886.8	30545.6	30049.4	46245.8	21684.2	37342.8	27188.4	23419.8	21162.6	11290.1	25408.9	23315.2	23503	20191.5	23993	17479.2	23976.5	22550.4	18121.2	31027.6	45297.9	22020	27303.8	13888.9	18619.3	25164.7	24941.3	20579.3	17389.2	31111.6	24151	25830.7	20779.9	23351	33900.1	21453.5	29433.4	27786.4	16596.7	26125.3	21880.7	26277.1	30154.6
40	fret	0.228713	0.204735	0.167678	0.15271	0.105188	0.208013	0.268632	0.289537	0.332454	0.201465	0.333364	0.237937	0.228713	0.158989	0.103688	0.191712	0.191712	0.248082	0.177232	0.214591	0.177232	0.22122	0.254893	0.186865	0.282529	0.34894	0.212117	0.254893	0.139481	0.213766	0.225377	0.291296	0.215424	0.190902	0.337925	0.267759	0.252334	0.244691	0.225377	0.290416	0.228713	0.397824	0.271225	0.178031	0.242154	0.209656	0.252334	0.284277
[truncated: 562 more columns]

## Sheet: 263-263_inter_liposome
1	donor	55944.1	70793.4	30928.5	70304.2	75051.7	73289.4	54807.6	65249.8	54563	39028.1	52361.9	44823.4	39620.3	52268.4	35124.5	63717.6	49698	53066.8	51568.3	40807.2	40996.6	50539.6	44461.3	51556.3	53769.4	40747.2	46583.3	51407.6	60957.8	35208.5	50973.6	49240	43380	65350.5	34057.5	53922.8	42154.7	35376.3	51215.8	53167.5	55428.6	32597.3	19467.3	40476.3	47691.1	57344.4	55136.1	42224.2
1	acceptor	30960.6	21382.6	30338.3	28530.3	25102	21074.5	26692.6	27346.4	21336.6	27968.4	25648.4	24401.9	31291.8	24454.7	36548	21830.1	22692.1	28297.9	25362.6	28315.1	36637.9	27109.3	29564.5	31359.3	28817.2	19830.5	22779.9	21632.6	21565.9	24796.4	20851.1	20908.7	23148.1	20722.7	29311.7	22217.5	25512.2	16749.2	17919.7	25190.9	26940	20808.3	30028.3	23187.5	26733.2	18796.2	25535.7	23303.8
1	fret	0.355921	0.231894	0.494988	0.288578	0.250516	0.223533	0.327138	0.295276	0.28112	0.417204	0.328903	0.352258	0.441569	0.318381	0.509502	0.255256	0.313179	0.347706	0.329787	0.409229	0.472098	0.349523	0.399415	0.3783	0.348614	0.327138	0.32802	0.296118	0.261613	0.41322	0.290246	0.297805	0.347706	0.241139	0.462492	0.291919	0.377353	0.320996	0.259232	0.32187	0.327138	0.389755	0.606386	0.364231	0.359602	0.246593	0.316642	0.355921
2	donor	33013.1	25750.3	36534.7	20312.5	29538.9	36186.9	24095.8	28209.3	39896.5	35205.1	27605.1	30506.7	31971.6	34423.5	31521.9	37275.9	38022.4	31209.3	33657.7	38147.1	34999.6	38670.5	30076.4	43866	38703.9	41043.4	27394.3	32257.9	35825.1	27898.4	32754.9	34232.1	24452.4	41519.4	31348	41415.8	42822.7	32417.7	48123.5	35408.9	35972.7	41134.8	34527.1	35082.2	34650.1	38530	40340.9	41150.6
2	acceptor	34490.2	35860.6	33421.7	29750.6	34856.6	34158.6	31888.6	32787.4	34017.5	36421.7	29019.1	41342.4	36542.8	30968	35856	33018.6	28637.6	35008	30920.5	31695.9	30106.4	35605.1	36842.4	41756.5	28589.4	29919.6	33561.6	41459.3	38797.6	39155.5	37078.8	38511.2	39274.2	34029.9	34332.2	39144.9	28181.5	38022.7	42387.5	37781.7	39885.8	43766.6	43100.9	43105.9	43962.1	36263.9	39474.6	34984.4
2	fret	0.510854	0.581562	0.477524	0.593919	0.540806	0.485768	0.569302	0.53756	0.460174	0.508743	0.512969	0.574859	0.533247	0.473423	0.532171	0.469337	0.429245	0.528949	0.478551	0.454139	0.4622	0.479579	0.550594	0.487839	0.425311	0.421391	0.550594	0.562666	0.5204	0.583805	0.531096	0.528949	0.616788	0.45012	0.522531	0.485768	0.397191	0.539723	0.468317	0.516148	0.525736	0.515087	0.55497	0.551686	0.559362	0.484735	0.494071	0.459163
3	donor	7910.46	6756.89	5597.9	9009.37	10712.7	6151.86	9080.87	4910.56	5659.79	8032.43	7333.67	4973.65	9070.05	8860.36	8381.51	12580.7	7154.03	6789.93	10185.8	11821.2	10962.6	10690.5	10295.7	9489.42	12084.4	7773.48	7256.77	7321.06	9646.24	8049.85	12288.7	8714.96	6218.55	8251.73	9964.07	8557.55	4723.1	8988.34	10452.5	5039.14	9080.87	11388	8675.31	5740.3	11131.5	10831.7	8058.27	7998.78
3	acceptor	10867.1	13268.5	13614.4	13024.7	10275	12668.3	14937.4	14507.5	10723	13435.5	16583.3	19970.4	18829	10302.7	17072.2	7385.45	17045.5	22998.3	13021.1	13352.3	13346.5	9861.19	11673	17449.4	12572.6	15240.5	15594.7	20182.9	14442.6	18493.5	12206	14665.6	16671.7	14104.4	10573.4	17211.4	16279.5	17010.9	15760.8	12168.3	23669.1	11208.1	15937.9	17102.2	18243.1	16215.9	23899.8	14104.9
3	fret	0.578914	0.66232	0.709023	0.590866	0.489497	0.672974	0.62182	0.747214	0.654221	0.625598	0.692949	0.80027	0.674734	0.537634	0.670326	0.369257	0.703988	0.77201	0.560617	0.530174	0.549213	0.479275	0.531244	0.647858	0.509588	0.66232	0.682599	0.733651	0.599705	0.696365	0.498474	0.62748	0.727985	0.631228	0.515032	0.667667	0.775044	0.654221	0.601655	0.707349	0.723089	0.496239	0.647858	0.748792	0.620872	0.599705	0.748003	0.637741
4	donor	24135.2	26091.7	21180.6	22998.7	18981.7	22626	22847.8	25978.4	23061.4	24840.2	21502.1	19226.3	25287.5	29064.2	25648.2	23358.3	24073.1	22400.5	22917	22549.8	26481.8	26288.9	27900.5	24834.8	32433.5	26987.4	29297.4	28271	23920.5	21307	22364.5	26902.9	28952	17592.4	27316.4	20154.2	31980.7	26662.1	27253.8	20302.9	24774.8	24795	20734.4	28376.7	25846	26766.7	36050.6	27443.9
4	acceptor	43608.6	42476.9	37254.7	47005.1	35180.7	45705.3	39891.9	44853.7	42882.6	45664.8	39945.6	45195.7	43509.4	35920.1	44928.3	38067	46294.4	40357.9	43348.1	48035.6	36885.7	36849.5	42331.4	35178.4	34675.3	29008.4	39183.2	35603.7	34892.4	44009.7	44928.2	38446.3	44939.8	38492.5	50267.7	40132.8	42360.8	44688.5	47384.8	52443	44436.1	40107.8	45297.4	45354.1	44387.9	44325.2	40839.7	48149.6
4	fret	0.643583	0.619067	0.637708	0.671901	0.649453	0.668977	0.635749	0.632808	0.650431	0.647497	0.650431	0.702028	0.632808	0.552881	0.636729	0.62005	0.658247	0.642605	0.65434	0.680663	0.581616	0.583597	0.602341	0.586561	0.517025	0.518024	0.571722	0.557845	0.593467	0.673849	0.668003	0.588536	0.608249	0.686497	0.647497	0.666053	0.569742	0.625942	0.634769	0.721386	0.641626	0.618085	0.685525	0.615136	0.631828	0.623978	0.530993	0.636729
5	donor	44620.8	47114.8	32709.1	46124.6	47600.8	44249	56186	55047.9	49693	62397.5	60900.8	52517.8	59073.4	59905.9	62290.4	56140.3	59674.9	52781.3	49176.8	44680.9	60766.1	59984.1	51400.1	61413.3	53817.1	59667.7	67197.7	52642.9	56158.3	50074.3	49810.9	57071.4	55110.4	57219.4	58080.8	59776	56395.3	58864	55108	65614.5	56970.4	58278.1	68455	71941.5	64844.5	68648.6	64513.7	61651.6
5	acceptor	12724.5	23762.4	15574.3	15109.4	19432.6	15686	-2949.16	-6025.26	5147.41	-2854.8	-673.041	-3558.94	-4878	-9031.49	-1530.51	-2209.59	-3822.04	-3639.94	2437.25	1029.94	1613.07	1843.55	1615.19	-980.152	4945.85	-1380.56	-1997.49	-3577.77	-979.324	826.37	-1417.05	-1996.2	778.4	-4447.69	2015.44	3827	-910.442	-1361.2	-5596.45	4425.59	-115.43	3079.6	940.292	-4582.38	1092.93	-354.618	3475.38	1920.9
5	fret	0.221472	0.335593	0.322994	0.247135
6	donor	38330.5	38505	28865.1	33189	42483.8	48518.1	53204.5	40408.1	46743	44811.9	52636.8	47779.2	45626.2	56049.8	31829	43250	70493.3	87377.7	86758.7	1369.29	1220.03	-5709.23	-2380.87	-6729.4	463.732	-3766.19	-1772.5	1895.03	-2901.95	-1795.82	3887.38	-4385.89	345.124	2496.73	-8605.81	1030.79	-926.251	2563.37	-7798.87	-3718.21	-1388.02	-3790.18	4876.23	-1173.46	1594.51	-28.0258	5468.61	2811.25
6	acceptor	43350	47420.7	47849.1	42302.7	43212.2	46452.4	40334.3	50563.7	43487.8	47256.5	48264.4	51582.6	49054.9	39588	48295.7	48064.1	20462.4	1661.31	1219.63	-808.082	-2738.96	2786.01	3181.84	27.134	-2541.91	736.838	-1128.83	-2286.09	3274.3	-525.508	-1984.18	207.157	-4238.65	-589.733	-3788.19	-693.959	1376.19	-972.74	-1543.16	-6034.34	4835.14	-1.589	1457.37	2213.02	-5624.58	-1059.65	-793.227	-233.057
6	fret	0.530408	0.552295	0.623898	0.560702	0.504672	0.489425	0.431593	0.555443	0.482346	0.512878	0.478314	0.519046	0.518017	0.414016	0.602236	0.526268
7	donor	27143.6	29680.1	28270.5	34168.9	30515.4	26636.7	27207.3	20974.3	27362.5	27734.9	19909.3	27710.7	30868.9	31768.8	31617.2	29797.6	28932.7	22965.3	33172.1	20829	33559.7	25505.3	28822.3	24022.2	31227.8	32581.7	23596.9	25001	27330.2	26993.8	25778	27268.3	24985.8	22206.2	24825.2	22169.4	27184	23613	22693.4	30396.9	29367.8	20849.6	25055.8	24133.4	21501.9	31083.3	25309.7	34153.6
7	acceptor	44920.3	33558.7	35463.3	42693.4	40124.5	37487	36786.5	47069.7	43392.3	41240	47727.8	33853.2	39165.8	35786.6	36259.7	37812.7	36424.9	39821.3	40530.4	43422.4	37758.7	37569.2	39508.6	41647.8	34494	38606.9	42579.8	39604.3	41304.6	33541.5	53014.7	36774.2	44560.7	47197.7	34711.8	37273.5	43800.4	38927.7	38343	35459.2	37709.4	35850.5	35405.4	38344.7	41961.2	38562.7	44587.7	34515.7
7	fret	0.623424	0.531122	0.555935	0.555935	0.567776	0.584476	0.574663	0.691386	0.613732	0.598163	0.705556	0.549998	0.558899	0.530126	0.53411	0.558899	0.556923	0.634051	0.549998	0.6762	0.529129	0.595235	0.578592	0.634051	0.525139	0.542064	0.64368	0.612761	0.602072	0.553957	0.672391	0.574663	0.640794	0.680003	0.583496	0.627293	0.616643	0.622456	0.628259	0.53809	0.561861	0.632121	0.585456	0.613732	0.660939	0.553957	0.637906	0.503101
8	donor	14919	4212.31	-7062.56	6629.85	1455.25	6612.87	-25.6319	7677.35	6183.49	1537.13	6268.37	4611.74	8888.62	6345.26	-4264.57	-1978.84	12120	5437.55	2661.53	-1269.85	-2165.57	-1119.07	5810.02	6918.44	3112.88	5638.27	634.425	10280.6	6207.45	9443.82	11480.9	9671.5	737.277	7219.01	8550.1	11649.7	4290.2	2043.41	-1428.62	6731.7	5825	2948.12	685.352	1834.71	4468.94	6484.06	18073.5	7049.25
8	acceptor	23733.9	21297.7	20720.4	20896.2	31316.2	28680.8	24351.9	23484	23854	25314.2	29548.7	21738.1	26241.4	20566.2	27492.8	26602.4	25586.5	29594.9	29517	24432.9	26146.5	23286.1	32087	27110.4	31252.9	27380.2	28668.5	29234.1	24112.4	27412	30616.2	26102.7	28010	28130.9	27133.7	22109.1	27819.8	28519.2	31236	24873.8	28398.6	24893.8	25753.4	25078.1	24667.4	25099.5	26660.4	20641.5
8	fret	0.614259	0.834762	1.51774	0.759811	0.956173	0.812756	1.00178	0.753941	0.794277	0.941957	0.825271	0.825271	0.746653	0.764237	1.1841	1.08124	0.678072	0.844344	0.917534	1.05545	1.08929	1.04958	0.84595	0.797333	0.908948	0.830005	0.977862	0.739421	0.795804	0.743754	0.727964	0.729388	0.974216	0.795804	0.759811	0.655418	0.867065	0.933168	1.04763	0.786679	0.830005	0.893672	0.974216	0.93142	0.84595	0.794277	0.595602
9	donor	11363.4	11345.3	10020.7	11293.4	11711.3	13046.1	12325.9	12116.6	10700.7	16129.6	10829.8	8216.89	10102.6	11649.1	11104.5	8023.28	9612.28	8816.6	10871.5	11255.6	15980.9	18500.1	9711.45	10549.6	15388.2	7637.64	13566.3	10242.7	14273.8	11121	10887.3	12223.6	5958.92	16212.3	11436.6	11020.3	15614.1	17042.6	17913	12495.1	10337.1	13703.2	13361.7	12363.7	15479.5	13035	17751.7	20130.8
9	acceptor	12906.7	9999.24	7775.89	9668.46	12258.8	13812.3	10656.2	12011.9	10058.7	14005.6	11282.2	15363.8	20400.4	12548.1	11543.6	13058.6	13343.4	13998	18807.3	9157.72	8660.14	15475.5	11209.7	6156.59	8314.4	13049.7	10169	11500.3	9266.15	14027	9827.4	12253.5	17043.1	10283.4	18043.2	13543.6	16749	12878.7	9333.75	13990.8	18905.3	17995	10179.7	11912.2	18175.8	11109.3	4814.86	9361.27
9	fret	0.531372	0.468053	0.436868	0.461657	0.510948	0.514033	0.463793	0.497499	0.48496	0.464859	0.509919	0.651182	0.668565	0.518133	0.509919	0.619451	0.581058	0.613766	0.63355	0.448772	0.351474	0.45523	0.535419	0.368768	0.350314	0.630743	0.428112	0.529344	0.393708	0.557449	0.474419	0.500615	0.740857	0.388076	0.611865	0.551478	0.517109	0.430302	0.342169	0.528329	0.646566	0.567339	0.432488	0.490199	0.540459	0.460588	0.213969	0.317444
10	donor	18271.9	15731.2	13195.3	16010.9	20206.2	12298.4	17960.9	16873.4	7429.69	14295.3	13801.6	10492.2	19781.2	17332.8	16753.1	13531.2	17692.2	11303.1	14779.7	13420.3	14923.4	14825	7321.88	13153.1	11546.9	18232.8	17989.1	10479.7	13156.2	16364.1	22410.9	17254.7	12437.5	10832.8	14778.1	21729.7	43025	30592.2	36709.4	38745.3	38028.1	39104.7	40771.9	32668.8	37120.3	42478.1	46764.1	37892.2
10	acceptor	37921.6	36722.6	41125.9	40288.2	42074.5	31702.4	35244	34293.7	35878.8	34386.8	31729.4	40182.3	32388.3	29321.7	38771.6	23292.1	27806.6	36061.8	37588.4	32132	34741.6	31644.6	35318.5	42203.2	42710.7	33686.3	39189.9	32810.5	35506.8	32368.4	34513.6	35118.6	33390.8	33560.7	33502.2	6915.46	-2842.07	5916.66	-1938.4	-603.663	-5528.5	896.212	1834.1	-1925.88	-2961.41	-245.2	-1327.71	1967.86
10	fret	0.675082	0.700353	0.757374	0.715869	0.675082	0.720321	0.662005	0.670715	0.828585	0.705882	0.697041	0.792715	0.621072	0.628558	0.698144	0.632847	0.611483	0.761905	0.718094	0.705882	0.699248	0.680552	0.828585	0.761905	0.786979	0.648985	0.684938	0.757374	0.72925	0.664179	0.606172	0.670715	0.728132	0.756243	0.693734
11	donor	17777.6	9452.26	13520	17207.1	15245.4	9200.87	19510.1	18005.7	22486.4	36548.3	29701.1	28563.3	26800.5	29535.5	27125.6	27884.8	26188.7	29620.3	22593.4	27976.7	27991.8	25211.3	32602.7	28561.3	29621.3	29425.5	32083.8	32012.1	26697.5	32149.4	29574.9	31954.6	25750.5	32193.8	30360.4	31846.5	22713.6	29386.1	29031.7	29282.1	31768.8	27849.5	31065.1	30088.8	34942	29750.6	24769.1	33948.6
11	acceptor	27529.7	25562.6	30700.1	24853.4	24249.9	19692.9	28328	17323.5	20083.3	2137.03	484.998	-1509.55	1467.05	-386.756	-2783.77	-6439.89	-1027.08	-3831.43	3299.57	370.258	784.432	995.331	3146.71	3789.65	-157.661	44.932	-946.003	1806.46	-950.099	2210.86	-686.445	-32.203	-3908.95	6563.65	699.947	806.632	1960.73	-810.956	2898.16	2038.13	1367.85	-3923.99	-2530.66	-2313.52	-321.968	3817.96	1031.29	-3547.68
11	fret	0.607261	0.730105	0.694064	0.590632	0.614086	0.681652	0.592593	0.490278
12	donor	32797.1	25495.8	22829.3	27866.5	26975.8	25955.9	26191.6	23827.7	22506.4	29045	26504.4	37080.7	27494.8	31781.8	31362.5	27544.7	19986.1	28058	28537.4	30742.6	26796.7	31550.6	25240.8	21270	33106.5	27798.5	24640.2	23878.7	25502.6	32973.9	28970.2	26124.7	24956.4	22640.1	27854	30240.6	22359	32196.5	27386	32728	31565.3	33698	29960.7	33565.5	32061.7	26925.9	34552.5	30835.5
12	acceptor	34463.7	29583	34792.8	33718.6	36880.6	34182.7	32107.5	39435.2	35020.2	32915.1	31660.4	31490.8	33394.2	35773.1	31534.9	29637.5	36070.5	33040.5	39530.1	38611.9	38069	33902.7	31608.4	42731.8	34410.5	32879.4	32890.7	36794.3	30122.1	39222	32869.8	29078.2	34890.4	33795	33146.2	36486.2	33573	37171.9	39327.3	48251.3	35872.4	37021.2	43036	29159.2	42530.3	41309.6	35109.9	43340.9
12	fret	0.512761	0.536948	0.604122	0.547065	0.577549	0.568385	0.551123	0.623633	0.609249	0.530894	0.544028	0.458774	0.548083	0.529885	0.501714	0.518798	0.643224	0.540992	0.580608	0.557208	0.586731	0.517791	0.556194	0.668078	0.509746	0.542004	0.571438	0.606172	0.542004	0.543016	0.531904	0.526859	0.582648	0.599	0.543016	0.547065	0.600024	0.535943	0.589795	0.59593	0.531904	0.523834	0.589795	0.464743	0.57042	0.605147	0.503721	0.584689
13	donor	15005.4	19611.1	29207.9	27379.6	23238.3	19624.9	27998.6	20508.7	24432.1	17552.9	25237.7	27400.8	20136.3	30066	24772.3	31108	23857.3	32909.6	26983.2	31921.9	23831.5	27348.4	21926	32195.9	25681	22289.2	26208.9	25594.5	34423.4	25325.1	26563.9	25724.2	26885.8	21936.1	25813.4	29482.9	30098.2	25212.9	20734.1	23926.3	22946.8	32446.1	19436.4	23694.5	20120.6	33807.2	28973.4	19343.5
13	acceptor	33332.7	36509.1	35988.2	39995.2	40057.1	40276.6	36998.9	31347.1	44258.5	38712.9	40275.3	43035.8	33557.9	41417.1	38520	33300.7	43196.4	38095.4	36524.7	36835.2	36490.1	40283	35353.1	34973	38169.8	42022.1	31247	36754.3	33235.5	41978.1	42649.8	35840	37414.5	34132.7	31673.5	36554.7	29175.6	34457.3	41642.1	37455.5	37337	36492.5	37097.8	41485	34073.3	32384.7	37621.5	39580
13	fret	0.689986	0.650589	0.551783	0.593177	0.633164	0.672739	0.569577	0.604924	0.644789	0.688073	0.614685	0.610783	0.625394	0.579428	0.608831	0.516947	0.643822	0.536891	0.575491	0.535897	0.604924	0.595145	0.617609	0.520944	0.598084	0.653485	0.543848	0.589254	0.490867	0.623449	0.616634	0.582379	0.581395	0.608831	0.550792	0.553764	0.491873	0.57746	0.667935	0.609807	0.619557	0.528926	0.65638	0.636074	0.62831	0.488854	0.564643	0.671779
14	donor	21058.4	23485.3	17895.3	16027.1	22104.1	23387.6	18325.3	8805	18234.1	21118.7	6392.75	11192.8	23951.2	18939.4	6692.45	12036.5	14930.9	14308.7	20483.5	23688.9	22187.2	25062	13189.7	18901.9	19063.2	19244	18048.4	26350.4	22094.3	9515.15	18836.8	20315.7	15479.8	14211	18665.7	11906.2	25527.8	22304.5	13754.9	12963.3	21998.2	11587	14772.9	20258.7	28873.4	21179	19936.2	16036.9
14	acceptor	15665	13509.8	18742.3	16467.7	14848	9229.81	19486.6	15262.6	14660.2	17578.7	17879	16507.4	16617.8	14017.6	10639	21512.3	13819.1	13247.3	18342.8	17165.6	20781.7	16140.2	14182	17724.6	14284.2	13886.7	15923.2	17110.3	22208.9	22339.2	19466.6	18945.2	19107.9	13760.2	15353.7	22061.8	10865.3	14477.4	13822.4	15969.3	16535	12231.3	28303	21485.1	7705.47	16774.2	14967.1	21397.6
14	fret	0.426799	0.364808	0.511591	0.506523	0.401427	0.282978	0.515642	0.634212	0.445504	0.454414	0.736233	0.596176	0.409206	0.425818	0.614068	0.641673	0.480334	0.480334	0.47233	0.419942	0.483341	0.391738	0.517675	0.484345	0.428761	0.418964	0.468337	0.393673	0.501465	0.701054	0.508549	0.482338	0.552501	0.492387	0.451441	0.649143	0.298753	0.393673	0.501465	0.551471	0.428761	0.51361	0.65666	0.514626	0.210999	0.441555	0.428761	0.571128
15	donor	10760.3	15276.7	11141.3	16130.5	10630.9	15046.5	11130.1	17280.7	14077.6	18982.2	13285.9	15016.9	12313	10174.5	12318.1	16356.7	15973.6	18943.4	13327.7	14451.5	15517.2	7227.02	19714.7	12440.3	16200.8	15504.9	13323.6	13240.1	13301.2	15890	14415.8	12100	7339.09	8558.62	11640.5	12432.2	14800.9	21205.2	14116.3	8744.04	16752	13385.8	19876.7	12053.2	15315.4	17214.5	11176	11345.1
15	acceptor	29603.8	19607	29058.1	18775.2	28254.3	25775.8	26285.3	23490.3	25144.3	31443.2	27364.2	28115.1	25735.5	29182	24875.6	22029.3	28679.8	23657	23574.8	16714.3	15355.8	20778.2	19463.7	18343.7	24296.8	25901.6	26245.5	16685.7	27489.9	20198.3	20963.7	16267	23299.7	24289.2	23123.1	15750.7	17335.3	19966.7	15682.6	16485.5	24092.7	20202	20128.8	22044.9	17464.7	20456.9	24249.9	26429
[truncated: 58 more rows]
[truncated: 562 more columns]

## Sheet: 266-266_inter_liposome
1	donor	31427.1	31342.2	25621.2	32149.6	32735.4	32973.6	18771.6	20916.5	29731.3	29659.1	21501.2	26922.6	27158.8	34430.2	26080	18738.4	29757.7	29683.5	24615.6	28743.3	34209.6	32308.7	27490.8	22196.4	28680.9	26896.2	27566.9	22572.2	29060.6	32161.3	31352.9	25594.8	25696.3	35764.8	28958.1	34339.4	30837.5	33215.7	13927.2	29008.9	31110.8	31460.3	33123	23260.5	29958.8	24452.6	27595.2	26907.9
[truncated: 110 more rows]
[truncated: 562 more columns]

[truncated: 15 more sheets: 274-274_inter_avitag, 274-274_inter_liposome, 274-307_intra_avitag, 274-337_intra_liposome, 274-337_R304W_intra_liposome, 298-298_R304W_inter_liposome, 298-298_inter_liposome, 307-307_inter_avitag, 307-307_inter_liposome, 307-337_intra_avitag, 309-309_inter_liposome, 312-312_R304W_inter_liposome, 312-312_inter_liposome, 337-337_R304W_inter_liposome, 337-337_inter_liposome]
