# Supplementary material for: Conformational dynamics of auto-inhibition in the ER calcium sensor STIM1
Source: eLife. 2021 Nov 3;10:e66194. doi: 10.7554/eLife.66194 (PMC8651296; doi:10.7554/eLife.66194)
Supplement: Figure 1—figure supplement 3—source data 1. [file elife-66194-fig1-figsupp3-data1.xlsx]

## Sheet: 239-400_intra_avitag
1	donor	33487.5	70349.5	34700.6	80163.2	57885.5	59177.3	51060.2	62765.7	50910.5	50443.6	52392	51282	66141.2	40917.1	62813.4	58115	115987	111455	119274	121226	104832	102533	112872	122320	118344	120939	99206.4	100964	103813	104843	85513.7	107756	109728	109223	111463	109962	60598.9	17338.6	84876.1	104343	100319	102985	106470	114419	109133	101900	99533.5	105897
1	acceptor	62983.6	49679.2	16823.2	31349	33991.8	44832.2	40057.8	38113.8	40002.2	47841.1	44654.8	51541	38766.4	50830.2	47786.3	34991.3	-2993.39	-2119.5	-5677.3	-1322.65	-3199.03	-4820.14	-2256.9	-1623.38	-2086.56	-3366.01	-4886.81	-7331.48	-2230.11	-2341.27	-446.118	-3799.79	-824.548	-6199.61	-2065.1	-3538.04	181.743	-2341.54	-5689.7	-3665.9	2333.65	-7319.33	-7318.09	769.588	-993.55	-1865.45	-3255.81	-5247.53
1	fret	0.653194	0.413892	0.326635	0.280654	0.370364	0.431045	0.440114	0.377464	0.440114	0.486327	0.460235	0.501348	0.36935	0.554228	0.432053
2	donor	44674	46216.7	46539.5	51237.7	55021.8	71000.6	47701.9	54304.3	34982.1	39663	61330.1	55897.2	62621.6	45879.4	54598.5	46916.9	52553.6	50046.7	64082.4	46489.3	53552.4	48331.9	49832.9	25541.2	54044.6	47040.4	43998.2	26928.8	61589.8	42795.6	46876.8	35765.6	42356.5	46764.8	39251.2	36583.5	43771.4	44181.8	38114.7	42050.9	45634.1	35906.2	45269.6	46612.7	47036.1	39587	35940.6	33968.9
2	acceptor	77386.2	63861.6	59842.9	60660.9	64403.3	56432.5	71769.2	67582.4	68361.7	91502	59114.6	70384.6	62158.7	68348.2	55816	62069.7	62583.1	57098.6	51057.5	59316.1	57367.7	65918	64046	82961.7	69657.7	67743.8	61532.8	76549.8	57861	85403.9	71449.6	68837.2	51808	63109.6	54822.9	65414	64322.1	60446.2	69719.5	46834.5	56943.2	63255.7	60123.6	64277.8	59440.9	52478.1	79295.4	77790.7
2	fret	0.634359	0.579833	0.562114	0.542314	0.539334	0.442539	0.600395	0.554208	0.661286	0.697478	0.491286	0.557175	0.498336	0.598434	0.505371	0.57	0.543307	0.533365	0.443568	0.560139	0.517397	0.576886	0.562114	0.764965	0.5631	0.590615	0.582777	0.739822	0.484221	0.666071	0.604295	0.658411	0.550248	0.573937	0.582777	0.641111	0.595504	0.577869	0.646888	0.527386	0.555197	0.638219	0.57	0.579833	0.558163	0.57	0.687993	0.695583
3	donor	37419.2	26295.6	39557.5	52296.5	27286.2	28194.4	39556.7	33804	39720.7	34461.2	38816.1	30000.2	32443.1	37889.5	41025.5	38024.6	34993	25191.7	36403.9	35369.4	27574	34451.6	35222.9	32790.6	37203.3	27203.8	33110.8	36303.9	31896.4	39345.2	42921.7	21339.7	33257.4	40003.3	36072.3	25345.3	40643	20213.9	31677.1	38067.6	37506.9	32867.8	21466.9	32816.9	40783.4	42412.8	37974.6	34699
3	acceptor	47786.8	48728.8	43980.6	30712.4	56743.6	43462.1	43762.3	35207.3	43855	41074.3	40835.8	46990.2	40023	35144.6	41871.2	41045.2	42569.8	54352	37271.6	38107.9	51129.8	42927	43742.4	43648.2	39083.1	56943.2	41327.7	42468.3	42853.6	42640.2	47985.6	56602.9	51243	35801.6	42989.4	50219.3	50140.4	59934.7	50342.1	49672.8	42315.4	37124	56380.4	43886.1	36969	33686.7	41251.8	51393.4
3	fret	0.560371	0.64927	0.526197	0.370383	0.675702	0.60611	0.525178	0.509787	0.525178	0.543401	0.51288	0.609925	0.552414	0.481604	0.504615	0.519044	0.548416	0.68289	0.505672	0.519044	0.64927	0.554408	0.554408	0.571229	0.51185	0.676603	0.555404	0.539374	0.573193	0.520068	0.528233	0.725986	0.60611	0.472069	0.543401	0.664861	0.552414	0.747372	0.613728	0.566306	0.530266	0.530266	0.724258	0.572212	0.475255	0.443053	0.521092	0.59652
4	donor	46345.3	44671.7	49145.5	46361.6	43919	45809.8	36586.3	45837.7	45661.8	40851.5	43399.9	35404	46375.1	38943.4	46254.9	40376.7	35616.4	49677.1	43882.5	41446.6	37038.1	41877.2	37563	42777	32923.8	49507.9	47961.2	38377.2	13741.4	47412.3	40617.9	42756.8	35475.1	33738	36374.8	40287.3	47490.2	42258.9	42054.1	36664.2	45331.1	41850.3	44493.8	47099.9	40766.9	44924.5	44211.2	38805
4	acceptor	52701.4	49517.9	63547.5	50734.9	67671.3	63773	72308.2	59724.8	55254.4	73771.7	54777.5	57925.2	46112.3	60928.6	61451.3	49587.1	56490.8	39368.3	63108.4	78274	78519.8	40718.7	59006.9	60003.9	68623.6	56192.9	55692.4	55938	86418.8	55368.5	65140.3	56031.2	51426.5	61336.3	67426.9	63204.5	53292.2	47114.2	63973.4	60785.1	45970.5	52660	50808.8	55353	58745.5	49144.8	50510.3	55664.3
4	fret	0.532585	0.525264	0.564312	0.522108	0.606521	0.582228	0.663968	0.565317	0.547084	0.644024	0.558258	0.620777	0.498626	0.610345	0.570324	0.551144	0.613203	0.441786	0.590075	0.654055	0.679062	0.493204	0.611299	0.584196	0.675535	0.531543	0.537779	0.593	0.862961	0.538814	0.616051	0.567323	0.592026	0.644941	0.64951	0.610345	0.528409	0.527362	0.603641	0.6236	0.504016	0.557245	0.533627	0.539848	0.590075	0.522108	0.533627	0.589098
5	donor	6422.27	16504.8	10676.4	6425.32	7774.33	12168.5	12497.4	17881.3	16215.6	14175.3	24373.6	9866.36	22251.1	22704.8	24812.1	21587.2	21444.1	33253.3	12917.6	16517	21361.9	21313.2	15774	12159.4	22619.6	21547.7	11553.4	25113.6	14942.7	14647.3	10030.8	20232.1	21562.9	8526.49	12829.3	11556.4	9592.3	5773.65	7597.71	6300.47	14330.6	16255.1	18368.5	15219.8	10953.5	9893.77	12591.8	18642.6
5	acceptor	116729	128204	132416	129858	122942	116675	117245	131819	123826	117382	118362	125487	129517	126128	118508	115198	119566	106831	129578	122549	122847	121990	127428	130121	124226	129261	133230	128701	111765	120610	122625	125877	127869	128675	120930	131403	123638	122728	128622	118505	131049	116328	124289	128129	130467	129165	117709	128955
5	fret	0.94802	0.885909	0.924954	0.95192	0.940269	0.906156	0.904297	0.880463	0.88409	0.891387	0.829445	0.926855	0.853714	0.846713	0.826031	0.841497	0.848458	0.761986	0.909885	0.880463	0.851959	0.851959	0.889557	0.91363	0.846713	0.857236	0.919274	0.836312	0.882275	0.891387	0.924954	0.860771	0.855473	0.938341	0.904297	0.919274	0.928759	0.955836	0.944137	0.949968	0.90059	0.876851	0.871459	0.89322	0.923057	0.928759	0.902441	0.873253
6	donor	31277	25451.1	29560.9	44227.7	38993.9	41678.5	30636.6	33935.6	41024.6	11853.3	29715.7	29874.9	47552.8	40751.6	32833.9	37243.6	42986.2	39111.4	24095	28345.5	19437	21321.9	20703.8	21242.3	18224.5	26113.9	26103.5	20896.4	28009.2	55445.2	78584.5	79408	76068.8	79578.3	76210.1	75304.8	71761.1	82504.7	99201.5	117520	88015.2	89171.2	107228	84820.3	105182	100242	109064	101426
6	acceptor	49394.1	58054.7	57710.6	29848.6	47625.3	58145.4	62277.9	55639.4	41129.6	89967.6	64312.9	67150	46204.8	55787.1	51718.7	48235.4	47431.9	57726.4	74708.5	69297.6	82799.2	80035.5	74956.1	80722.5	91248.4	84046.7	73446.5	80075.1	90763.8	32584.3	-3938.95	-3609.97	1188.83	-2744.08	-6209.79	-1528.98	1937.03	-5783.2	3596.42	-1431.18	2949.14	-2319.12	-3204.97	6666.86	2974.06	-1068.53	-809.53	-1991.28
6	fret	0.612543	0.694853	0.661789	0.402883	0.549541	0.581975	0.670031	0.620722	0.500241	0.883319	0.683466	0.691745	0.493231	0.577911	0.611521	0.564725	0.524338	0.59622	0.756308	0.709377	0.809954	0.789911	0.783596	0.792018	0.833247	0.762594	0.737491	0.793071	0.764691
7	donor	58932.3	57882.1	44223.9	47302.7	58882.5	69524.9	38286.4	38506.4	57973.8	57948.4	64927.3	54091.4	66912.7	69134.7	79711.9	75328.7	79048.6	69130.3	62130.4	49406.4	38797.1	53995.2	36331.9	47448.6	46893.6	54728.1	56839.6	7641.55	9407	14967.5	44521.3	58123.1	37725.9	45634.5	26034.4	48496.6	26263.3	39710.3	26256.6	18219.8	21395.9	18248.6	1924.04	11199	10367.7	33803.7	35279.5	40495.2
7	acceptor	5180.45	8676.37	16285.6	17470.2	8331.12	1955.57	2113.07	3100.4	1852.18	2256.92	-1143.42	720.128	3202.66	-1124.79	-2511.99	1996.17	2612.23	2791.78	526.327	7346.79	14596.9	3115.69	21491.3	6125.17	5940.89	2302.38	7219.04	59681.8	50096.8	51487	5864.27	7004.25	28507.7	8816.73	14483.9	14531.1	37483.7	31467.8	60710	59595.1	57055.6	46054.7	72686.1	54451.8	61470.9	34052.7	30759.1	26166.6
7	fret	0.0809782	0.130115	0.268854	0.269991	0.124033	0.0268988	0.0522171	0.0747577	0.030715	0.0370609	-0.0181144	0.0128495	0.0459146	-0.0168157	-0.0324507	0.0256253	0.0319857	0.0383279	0.00900243	0.1289	0.273401	0.0547346	0.372094	0.114266	0.113043	0.0408597	0.113043	0.886188	0.841768	0.774353	0.116712	0.108143	0.430794	0.161467	0.357969	0.230956	0.588483	0.442332	0.697972	0.765528	0.727095	0.716227	0.974201	0.828996	0.855294	0.502095	0.466246	0.392564
8	donor	69545.3	44357.8	31517.3	36973	34352.4	31041.8	36450.7	40260.2	28885.8	25168.2	30105.2	20119.6	26119.2	21839.7	33015.9	79361.6	88952.8	115111	139018	127098	126095	108222	89502.1	80770.1	92241.7	89033.8	110857	106867	149630	190007	110143	99421.1	91033.1	109906	99138.3	97535.3	90395.5	95896.3	112366	98848.4	106230	96049.4	81470.7	74647.9	76710.3	84529.1	94837.2	110588
8	acceptor	55271	65371.1	64174.3	57854	72527	63089.6	51936.6	62528.8	70281.3	67667.5	68454.3	76631.5	75463	57969.2	63291.2	1439.06	-1387.05	-1987.03	4534.13	802.076	-824.015	-1463.11	-7099.13	-4571.83	-1167.64	-4507.47	-3540.66	2856.87	-6000.68	2753.38	2126.3	-2743.47	3707.84	-3858.59	-4475.51	1560.63	4742.71	676.57	-1665.26	-1075.62	-4282.62	2696.01	-343.197	-273.773	7597.74	2697.3	6200.66	-409.856
8	fret	0.443261	0.595279	0.670338	0.610288	0.678347	0.670338	0.587274	0.608286	0.708382	0.728408	0.694364	0.792508	0.742428	0.726405	0.657326
9	donor	24939.7	26604.2	25301.9	27551.6	25322.9	31099.9	37008.8	30063.8	26975.1	27072.4	24166	31946.3	33779.6	22102.3	22260	23009.1	29770.5	26702.8	7112.14	19887.1	25454.7	29584.5	28425.2	33090.9	29657.2	37840.4	29540.2	32083.1	23432.9	25187.4	36931.2	25481.8	26372.6	27700.7	38068.3	31696.2	29371.4	30305.3	23801.3	29410.8	30009.6	9865.74	12108.1	22147.9	24310.2	34342.6	29081.8	28830.5
9	acceptor	24792.7	28061.2	25753.7	25205.1	25628.7	29335.6	32147.9	28588.4	34257.3	34768	38458.7	38392.1	34259.2	40363.2	32348.8	24384.8	30874.6	21940.4	43390.9	54891.1	34609.9	32411	30743.6	22522.5	36604.4	31115.1	35728.1	21150.8	27703.9	34097.3	30140.4	49117.8	45172.7	31483.9	24816.4	36728	25601	41574.4	35356.8	37704.8	33087.1	49697.4	46391.6	35355.3	33214.3	43424	28266.6	25674
9	fret	0.498375	0.513406	0.504394	0.47825	0.503391	0.485305	0.465118	0.487318	0.559172	0.56214	0.614226	0.546288	0.503391	0.646334	0.59269	0.514406	0.509403	0.450931	0.858872	0.733615	0.575961	0.522399	0.519403	0.405007	0.552239	0.450931	0.547281	0.39782	0.541322	0.574975	0.4489	0.657949	0.63177	0.532369	0.394735	0.536351	0.46613	0.577932	0.597596	0.56214	0.524395	0.833949	0.792981	0.615203	0.576947	0.558182	0.493353	0.471184
10	donor	23801.7	16964	30203	22621.3	26769.7	27579.4	20394.7	14435	27718.7	23828	25176.6	25266	20484	26462.1	33373.4	27432.1	20854.7	38336.7	62025.4	46391.5	55729.3	57724.6	52827	49370	66073.8	46877.9	48100.3	60994.9	58878.6	67199	59246.7	59504.3	46436.2	55342.8	52296	57243.5	55508.4	52727.1	49017.8	73058.7	67853.6	71860	61623.2	59383.4	46833.2	53965.3	48833.7	51494.2
10	acceptor	25870.1	40365.8	20364	15132.3	21613.8	20595	38311.7	35700.5	21097.9	22193.1	24824.8	27294.9	17408.6	20042.3	23988.1	26704.3	16375.8	96.571	-2334.53	-4276.49	-666.116	-6549.86	399.311	-4642.72	-472.763	-1311	-14278	-2938.01	-6982.91	-2678.28	-6606.46	-6753.31	-2912.61	1584.96	-2252.85	-6884.22	-3282.15	5164.55	-2948.73	-1979.08	-3914.97	-1282.64	-2981.99	760.57	-2869.42	3579.42	-1408.48	516.27
10	fret	0.521	0.704	0.403	0.401	0.447	0.428	0.653	0.712	0.432	0.482	0.496	0.519	0.459	0.431	0.418
11	donor	30621	43471.4	39038.4	32922.4	16813.2	29749	37541.5	7492.1	2825.85	965.691	2309.82	3052.58	8576.17	2092.84	7170.29	5247.55	1587.37	30739.6	50925.1	34786.6	33263.7	39320.4	40229.8	33731.8	31210.1	36985.7	37925.1	37453.7	34199.1	29155.8	39651.2	33184.9	37902.3	1480.1	-1207.34	206.675	-763.631	-4113.38	-2329.61	-3218.65	-1821.7	-3197.52	-458.887	-4698.49	-2556.34	-996.049	579.682	366.767
11	acceptor	64884	59659.2	54090.2	51027.4	63157.4	52788.4	44304.8	79398.7	90867.2	76581.1	86881.8	79882.2	90777.9	81955.3	85571.2	87707.3	84646.4	65234	60062.2	61265.3	51401.7	45440.4	51499.5	36836.6	58271.1	46705.3	56839.7	55112.1	58028.3	48919.7	35184.4	54997.1	54683.7	-4420.46	242.293	1776.41	835.721	-944.719	-87.829	-6735.11	1873.93	663.983	-2412.63	4414.66	1028.16	-109.555	-659.132	1462.44
11	fret	0.67931	0.578398	0.580357	0.607412	0.789527	0.639355	0.541491	0.913837	0.96982	0.987286	0.974382	0.96326	0.913837	0.975032	0.922842	0.943282	0.981503	0.67931	0.541491	0.637503	0.607412	0.536406	0.561598	0.522063	0.651314	0.557607	0.599753	0.594937	0.629128	0.626321	0.470221	0.623506
12	donor	53080.4	78882	95462.3	110104	104235	109058	106699	98193.8	112544	69999.2	58241.9	52743.4	50947.9	57327.1	60714.3	56544.1	60098.3	36856.9	53233.4	57982.7	54319.5	50095.4	59016.4	49645.1	53319.7	49901.4	44755.6	35285.1	50303.6	44284	55525.9	52133.1	55753.9	99468.3	110637	107957	97940.4	102053	97512.7	102725	100934	99066.1	98649.8	88842.4	103964	88186.7	100696	100205
12	acceptor	42887.5	22875	229.696	1636.76	6042.48	945.448	3027.64	3982	-1014.55	22617.3	32022	45023.2	41076.7	27654.5	19216.1	34428.7	42917.5	56037.1	25867.9	36510.6	32401.5	54141.8	29195.9	37911.2	33605.2	36923	44419	61488.5	36541.4	38860.7	36469.2	35314.2	30872.3	-5735.07	-2156.65	-4200.3	515.324	-6297.42	-5920.02	-2166.49	441.275	-5483.09	-6270.77	-2426.79	-10373.1	-1589.98	-6615.02	3046.91
12	fret	0.446487	0.225048	0.00201205	0.0150892	0.0543083	0.00905383	0.0271586	0.0392262	-0.00905482	0.244109	0.354376	0.460495	0.446487	0.325319	0.240096	0.378415	0.416462	0.603441	0.327324	0.386426	0.373407	0.519502	0.331332	0.433477	0.386426	0.42547	0.498504	0.635395	0.420466	0.467498	0.396439	0.403448
13	donor	163854	207277	282927	175380	203927	250586	237019	244122	206287	200875	289854	259112	183267	221071	274153	275421	270401	271380	215762	192473	252700	272061	260586	229390	269524	263349	297112	230597	237906	245916	203494	192143	226215	207834	210710	241988	249009	217813	224205	139050	43565.6	39555.3	-10805.6	16091.3	31771.7	29895.5	74380	264143
13	acceptor	320082	351385	239316	293141	249884	333389	284739	262898	259100	295827	293658	327689	281870	241957	312934	368737	342764	246605	278367	311446	291984	269549	280896	346885	317664	229306	263283	382729	295413	417718	264846	249756	234881	348254	315181	267256	341227	270390	340648	331652	581683	512043	513863	480781	486441	429473	552711	150098
13	fret	0.661822	0.628542	0.4581	0.625435	0.55055	0.57093	0.545471	0.518153	0.556653	0.595522	0.503056	0.55869	0.605812	0.522189	0.5333	0.571952	0.55869	0.476022	0.563786	0.618195	0.536338	0.498036	0.519162	0.601693	0.541406	0.46506	0.470039	0.6244	0.553601	0.629578	0.565826	0.564805	0.509088	0.626471	0.599635	0.525218	0.578087	0.553601	0.602722	0.704878	0.930386	0.928159	1.02155	0.967297	0.938189	0.934843	0.881664
14	donor	47079.4	59565.2	54844	49985.5	48387.8	41449.5	57277.5	42203.9	63455	51058.1	58891.2	62534.5	49266.5	61334.4	63111	57833.6	48200.3	58225.8	68230.9	52650.5	59872.8	63279.3	58823.7	63523.6	59952.1	68359.5	65462	65329.1	99730.4	65149.1	70832.7	59258.8	53872	64581.2	65901.4	63497.8	57889.3	57694.3	60508.2	68082	63665	65130.9	60907.9	62897.8	65219.8	71323.4	69195.3	58899.8
14	acceptor	54396.1	48351.8	56141.7	45913.7	57189.3	70665.6	41272.3	62549.8	54094.7	62499	51899.5	31227.8	54093.2	29230.2	32270.6	47035.9	78023.7	36653.9	43617.5	41744.4	39791.1	38686.7	44570.6	29723.5	45973.5	31552.5	33401.3	38415.1	3628.13	31368.8	29095.8	45190.8	45657.5	36018.2	61615.4	35411	32345.3	43576.8	41302.2	27943.6	42994.3	41382.4	37223.5	22267.7	29488.2	29985.4	33048.9	42617.7
14	fret	0.53557	0.447707	0.505375	0.478815	0.541552	0.630032	0.419276	0.597451	0.46021	0.550489	0.468501	0.332538	0.523549	0.322539	0.338081	0.448752	0.618588	0.386116	0.390426	0.442473	0.399019	0.379633	0.430909	0.319194	0.43407	0.315845	0.338081	0.369868	0.0348281	0.324765	0.291107	0.433017	0.459172	0.357867	0.482925	0.357867	0.358961	0.429855	0.40545	0.291107	0.403301	0.388272	0.379633	0.261475	0.311369	0.295627	0.323652	0.420337
15	donor	17310.1	13585.9	15431.8	22498.5	19799.6	10319.6	19017	27090	11012.6	13123.2	9873.07	14069.5	20904.8	18834.2	10028.2	21379.9	10199.6	17319.6	20937.2	21894	18000.3	19515.9	17364.4	14034.3	19106.5	21064.8	18968.5	16391.4	64791.1	125448	103107	751.958	4364.8	2516.97	1892.45	-1462.39	2250.41	3036.76	2181.86	1105.15	-4938.15	-5536	4110.61	-1356.72	523.477	-4493.56	-1767.03	3764.09
15	acceptor	81548.1	86501.5	82700.2	87593.8	77067.2	85350.8	79628.7	82674.6	81605	85915.7	86504.8	97498.2	103959	103473	105127	97507.6	95333	95877.3	96478.8	107512	92621.1	96275.2	105746	102550	104896	95867.2	105177	110375	62223.5	-1193.11	-3899.58	4284.04	358.577	7205.57	-4192.33	1565.88	2747.38	7663.12	1452.14	-264.095	1436.14	1918.65	-3008.28	3969.57	5054.79	4448.61	5589.91	-368.389
15	fret	0.82521	0.86475	0.842218	0.795582	0.795582	0.891691	0.807106	0.752803	0.880858	0.867423	0.897136	0.874126	0.833036	0.84617	0.913588	0.820016	0.90397	0.84749	0.821313	0.830423	0.836965	0.831729	0.859419	0.879509	0.84617	0.820016	0.84749	0.870101	0.489853
16	donor	11583.9	30884.7	36962.5	43459.3	46145.6	49941.5	43443	68964	95134.8	96916.4	100395	101415	94252.4	99532.7	104060	94266	92932.1	91020.1	91291.2	104874	94120.4	94173.1	104049	102176	16926.1	-2277.91	-1929.63	63.9097	-743.503	937.61	5034.44	-471.287	-1289.02	-1831.28	1050.63	-38.2401	220.393	-2438.74	-406.085	69.8863	-1795.96	-2625.65	1696.66	1284.26	-411.519	24.7887	-72.4707	413.281
16	acceptor	82792.9	62686.1	55393.8	54296	58458.3	46823.1	51266.1	16849.7	177.521	343.251	-1328.12	-5027.13	-3969.38	-300.167	-699.216	930.052	2768.57	-1384.45	-3560.4	-835.732	-6860.03	-5873.89	3631.52	2572.47	2158.5	1398.78	-1405.48	-3820.68	-27.048	-1445.62	-161.335	470.483	238.596	732.159	170.322	2152.31	2931.49	-1881.09	1406.53	-859.91	2291.22	5230.84	-674.598	2363.26	2099.41	-1403.38	931.196	-767.222
16	fret	0.877351	0.67013	0.600133	0.555058	0.559008	0.483966	0.541188
17	donor	65685.1	65915.2	75667.1	63358.8	34314.8	42511.3	49486.6	56553.6	60616.4	45976.9	45404.2	46533.7	47036.7	104215	102680	104087	101812	109770	102831	102064	102594	120066	108166	104813	101883	101690	100468	106621	102306	99023.2	108757	97705.2	104644	107094	95609	100331	109326	101323	108233	111401	100018	106002	117621	104261	100801	101302	102594	96972.2
17	acceptor	38972.9	27374.9	30096.5	38894.7	58895.9	63031.4	55278.8	42442.2	35622.7	53586.6	54179.9	67625.3	61072.5	-2153.65	1178.69	-3063.89	751.842	-620.584	5319.84	-1051.26	4291.18	-7139.92	-352.402	-1349.74	415.809	-3967.68	6315.78	-1846.86	-43.218	-2223.79	-702.939	-1374.62	-3581.78	3246.36	-907.911	-5189.12	4806.48	-535.3	-83.708	699.871	3901.73	288.147	-4210.98	311.907	-473.48	-3603.14	-2338.82	-2748.2
17	fret	0.372519	0.293839	0.284443	0.380732	0.631981	0.597679	0.527376	0.428723	0.370467	0.538332	0.544297	0.592765	0.565123
18	donor	52574.5	50486.7	46587.4	48393.7	45829.4	56440.7	51492.4	58996.2	48472.3	49131	50023.5	52798.8	51194.6	49199.4	44190.8	46848.4	45773.6	55899.7	57180.3	56071	67546.1	51279.9	62662.4	51744.5	59268.2	55863.6	55692.3	45469.2	54945.4	56028.3	58519.8	34286	36170.9	38422	48078.3	53098	49837.5	55216.7	64420.2	52095.9	60791.4	60741.4	57543.5	57344.2	57581	59454.2	59707.8	50710.2
18	acceptor	43494.8	40507.9	40365.7	40218.5	41541.1	39233.7	41808.9	33421.3	36842.2	42202.8	40931.9	36355.9	37801	38060	41189.8	39261	39908.3	43522.2	32474.5	45134.7	35405	40361.8	35147.3	40176.5	48370.1	40396.7	35608.9	42419.6	36620.2	33825.3	36266.6	46197	64144.3	63491	45490.1	33136.2	44707.8	43202.1	36066	39685.8	39551.6	42240.4	46737.2	42406.9	44702.2	44166.2	41327.9	43124.2
18	fret	0.452949	0.445002	0.463893	0.453943	0.475854	0.410352	0.447981	0.361189	0.432109	0.461902	0.449967	0.407391	0.425178	0.436073	0.482842	0.455932	0.465885	0.438056	0.362169	0.445994	0.343587	0.44004	0.359231	0.437065	0.448974	0.419244	0.389653	0.482842	0.399503	0.376879	0.382773	0.57441	0.639625	0.623257	0.48584	0.384738	0.472862	0.439048	0.359231	0.432109	0.394577	0.410352	0.447981	0.425178	0.437065	0.426168	0.409365	0.459911
19	donor	21764	39419.9	44471.1	40439.1	41276.5	25172.2	40235.5	39861.5	49812.9	44564.4	36680.1	41842.2	38030.6	48008.9	40196	43599.2	47316.8	42679.6	52550.2	51534.8	48225	45849.1	22683.6	19273.5	46868.9	46763	48229.4	50212.5	61171.1	52097.3	52090.4	39969.3	51226	34754	39725.6	44085.9	39475.1	37847.7	36715.8	38811.1	38720.9	37246.4	38128.3	60386.3	59451.1	50725.6	43678.1	26844
19	acceptor	64006.6	56722	42474.4	45770.2	41299.4	64042.6	43851	54621	44304.5	45185	53959	49708.4	53916.5	44261.1	50914.1	47890.5	43507.5	50263.2	47054.7	41912.5	46639.7	42652.2	57479.4	64013.3	44065.9	45570.9	42707.2	47583.8	17615	43329.5	47447.9	49128.7	48876.3	77886.7	63816.2	59866.1	65728	66504.7	67196.8	68203.6	70506.5	71563.6	70241.2	49083.1	55590.5	41873.6	54427.1	61545.7
19	fret	0.746211	0.590415	0.488715	0.530699	0.499725	0.717773	0.521715	0.578499	0.470675	0.503726	0.595377	0.542667	0.586443	0.479698	0.558605	0.523712	0.478696	0.540673	0.472681	0.448588	0.491718	0.481702	0.716791	0.768716	0.484708	0.493721	0.469672	0.486712	0.223355	0.453612	0.476691	0.551634	0.488715	0.691232	0.616197	0.575517	0.625108	0.636979	0.646862	0.636979	0.645874	0.657724	0.64785	0.448588	0.483706	0.452607	0.554622	0.696152
20	donor	5577.36	7459.17	6167.28	14500.8	4420.71	2895.68	9455.61	11586	7481.07	6021.73	1845.94	3468.85	7997.57	11430.2	8563.01	13521.9	5622.44	2431.99	6542.09	29278.4	12678.3	3221.55	-668.295	5818.22	15509.4	8228.12	9337.12	10774.6	34480.7	13725.4	13359.6	11324.5	4277.74	9786.64	8865.7	502.523	9397.65	13758.9	8988.06	4671.87	9142.62	9852.33	7787.62	4040.74	11960.8	6602.63	2460.33	9566.39
20	acceptor	71666.6	69769.6	69181.7	60008.3	70489.2	76193	60324.9	55876.5	57807.7	68198.8	66587.8	74124.1	74164.9	65652.6	64544.9	64139.6	71563.8	61999.8	73680.1	40336.9	40964.3	61375.4	74396.6	67010.4	67000.5	67139.8	67971.6	59753.7	39426	63463	68352.6	64381.1	70165.1	54266.3	63384.9	71599.4	78317.4	67115.1	65921.3	67887.4	63756.2	71478.3	63123	71282.7	58971.6	64631.1	63236.1	71974.8
20	fret	0.928111	0.903033	0.917508	0.804944	0.941455	0.963015	0.864153	0.828635	0.884781	0.91883	0.972531	0.9549	0.903033	0.851384	0.883485	0.826125	0.926782	0.96166	0.91883	0.579456	0.76333	0.949509	1.00968	0.920153	0.81239	0.891278	0.879601	0.847571	0.533689	0.822368	0.836184	0.850112	0.942795	0.847571	0.877017	0.993093	0.89258	0.829891	0.879601	0.936105	0.874436	0.878308	0.889976	0.94682	0.831147	0.906969	0.963015	0.882189
21	donor	79404.1	82362.9	78260.5	73064.5	69141.9	72140.7	81531.4	76759.9	75459	83783.6	96497.7	76562.7	104260	99274.2	83266.8	96178.1	94420.3	102188	103017	98630	99254.3	83928.4	122211	104553	103249	97893.5	98924.7	100760	98854.8	95201.8	110473	97910.9	95201.8	93818.6	100288	103035	110802	103444	108842	97876	99508.9	106832	94767.4	109779	112715	104523	86457.8	109092
21	acceptor	27636.1	27075.2	16800.9	28098.8	30561.6	18164.2	16827	14751.4	22952.8	9869.44	9831.32	-531.497	-0.267	-2072.59	-1368.64	-1671.39	-392.607	6163.51	-4979.44	-963.211	-2822.59	2537	-2833.38	-231.234	-564.774	-1443.14	-637.577	4814.22	3619.78	-5355.35	-3638.61	-8318.56	-304.227	5313.81	-3532.29	-5896.36	-6188.06	-7138.38	-6379.41	-9659.48	312.554	-6262.85	2207.91	255.37	-6572.94	1164.55	3460.51	3207.53
21	fret	0.25795	0.247741	0.176343	0.277536	0.306685	0.200863	0.170921	0.161008
22	donor	86000.4	88111.9	81473.2	85630.6	77613.4	80392.2	77374.6	85723	71445.4	77373	72317.9	79427.3	90875.6	98112.8	47279.4	51221.6	44581.2	49553.9	52738	87730.3	74165.4	75896.9	81279.9	67351.9	97210.1	81716.9	85017	112264	149321	139984	134006	140070	136600	144782	150029	169175	196359	139693	144762	138673	136983	134677	142676	138922	141499	151542	138888	132537
22	acceptor	55641.2	41728.1	62822.9	63622.4	50565.2	56276.3	56397	59651.2	42565.4	45650.9	48362.2	52020.3	47229.3	54702.5	103193	79644.5	103823	74633.3	97782.3	61318.8	56410.6	72991.7	60828.6	70783	48679.4	57584.2	62267.9	30850.1	645.203	3303.47	5510.19	-4871.6	-5413.9	3812.24	-4346.93	-6349.51	2433.98	-3508.95	-264.864	-814.94	-1861.15	2272.43	-8862.66	1251.25	-2599.42	-6223.22	1363.64	-2081.28
22	fret	0.393196	0.321484	0.435762	0.425842	0.394185	0.411976	0.421878	0.409997	0.373483	0.371514	0.401099	0.39616	0.342044	0.357747	0.686005	0.608443	0.699351	0.601339	0.649168	0.410986	0.431792	0.490555	0.427825	0.512583	0.333224	0.412965	0.422868
23	donor	33851	47772.2	39988	76457.8	48485.1	70480.1	46490.3	52359.8	26069.3	29355.4	57466.1	59643.2	47974.9	65604.7	36444.6	36158.4	77301	125451	64633.6	-2267.87	2169.8	-4803.56	-2672.46	-1628.2	-1237.24	-2740.6	-1305.38	-4522.48	-3822.33	884.494	-2597.5	-3769.52	1221.79	222.676	-1297.72	-2724.41	-70.3299	-3016.57	-1994.46	101.726	-1878.62	1252.45	-721.927	2565.02	1260.97	-613.753	-1190.39	-1608.61
23	acceptor	65894.6	59824.4	58846.4	54745.9	38942.6	40154.5	50987.9	42255.7	63424.2	60225.4	47147.8	54632.6	42281.7	42970.6	52288.2	63797.6	39073.7	-2119.42	-1897.51	-2294.23	-2604.07	707.221	2212.22	2785.73	-8289.52	-2642.14	-221.862	-4278.94	-225.747	517.51	918.991	2643.88	-183.906	-760.214	-5210.68	6793.37	348.87	1257.31	-660.47	535.865	-1007.15	-2655.84	-1745.79	-3571.63	-3018.49	2122.3	584.293	-47.647
23	fret	0.660338	0.556291	0.595134	0.417236	0.445862	0.36252	0.522851	0.446852	0.708594	0.671819	0.450817	0.477682	0.468708	0.395652	0.588976	0.63849
24	donor	87314.3	81999.4	80253.4	75830.7	89628.3	87499.4	74145.2	79668.9	78175.8	67978.3	70530.4	77182.8	75548.6	64240.8	66096.7	83296.5	69676.7	109016	68588.4	72554.9	67278.4	70810.7	79123	73564.4	70400.3	62692.7	72998.3	55750.9	65646	52169.1	81576.2	69854.4	68929.2	65279.6	35387	57344.8	81308.7	79441.8	61457.9	66844.2	90733	61862.8	40656.2	81120	85317.3	72963.5	59356.4	89500
24	acceptor	15285.1	20541.9	24491.5	14126.6	15487.4	13556	17595.8	13963.2	23561.5	10470.6	27227.5	17061.3	20190.2	20214.7	22877.7	13335.2	12935.5	18891.4	21180.9	7219.16	22378	15019.6	8607.12	11208.9	10604.5	12252.3	19123.9	21797.3	24080.8	24368.9	7187.2	13968	15678.9	12883.5	10821.8	19093.9	8902.71	14526.2	15693.4	13741.5	23287.3	25210.5	39888	18103.4	13921.2	21723.9	25401	-116.443
24	fret	0.149068	0.200029	0.23374	0.157361	0.147227	0.134364	0.191645	0.149068	0.23186	0.133447	0.278182	0.181422	0.211235	0.239387	0.257318	0.138035	0.156438	0.148147	0.235622	0.0905771	0.249758	0.17493	0.0978414	0.13253	0.130697	0.163826	0.207496	0.281035	0.268685	0.318309	0.0806105	0.166599	0.185135	0.16475	0.23374	0.249758	0.0987504	0.154596	0.203761	0.1703	0.204694	0.289607	0.49491	0.182351	0.139871	0.229041
25	donor	29264.2	24621.4	23486.6	24380.1	14367.2	22521.6	21470.8	23870.8	32411.3	28894.3	25815.2	25184.3	28921.1	30325.7	46723.9	37500.8	25952.8	15173.1	10262.3	28152.7	19883.9	20954.3	24555.3	11041.4	13806	22248.2	27718.4	24492.7	27829.2	19640.8	21724.6	13234.2	35946.1	21106.2	25438.1	28175.9	24601.7	21853.2	30384.7	22662.8	14749.6	10764.4	27607.6	25246.9	14290.3	27923.9	26694.4	27755.9
25	acceptor	37530.7	28199	28101.5	31020.5	38869	27115.3	27542.7	38448.6	25747.3	28887.6	31414	28756.6	29860.9	28438.6	14556	14156.4	22161.7	29737.5	40027.4	23617.7	32134.1	33953.4	31436.5	52944.3	55233.5	50390.2	32923.2	48634.4	50653.2	44452.9	32449	37554.3	25220.8	25466	28605.4	42192.5	38740.6	30033.7	27457.4	41464.7	40838.5	40016.7	29383.9	24652.9	32509.5	28435.7	30562	33152.3
25	fret	0.561828	0.534072	0.545004	0.559853	0.730232	0.545996	0.561828	0.616656	0.442252	0.500057	0.54897	0.533077	0.508092	0.483931	0.237867	0.27457	0.460613	0.661984	0.79616	0.456542	0.617627	0.618598	0.561828	0.827262	0.799835	0.693441	0.543019	0.664856	0.64566	0.693441	0.59914	0.739599	0.412461	0.546987	0.529091	0.59914	0.611797	0.578568	0.474826	0.646623	0.734919	0.787877	0.515106	0.494019	0.694389	0.504077	0.534072	0.544011
26	donor	34498.3	36714	32043.9	41451.2	51892.1	48564.5	41014.9	26009	34866.2	39935.9	22172.1	38104.5	44333.3	31297.4	37128	35779.6	38275.4	21888.9	7609.09	8754.45	12494.7	17005.2	40669.9	52104.3	61438	41559.6	48063.1	51250.8	88595.9	102297	117672	142387	125078	116333	97009	114211	49422.7	78978.4	66156.1	96425.5	100316	105327	110055	104155	95613.9	49752.5	-977.433	-6357.24
26	acceptor	57214.7	56343.7	65779.7	50588.1	46862.4	58373	43851.2	64874	59238.2	58868.1	70372.1	56528	52862.9	62889.4	57388.5	61396.3	54078.6	66371.9	99949	78645.4	86542.2	90530.4	56542.9	43681.7	44595.6	57111.2	56230.6	54953.3	25568	-1826.59	2431.39	3953.05	2024.07	-2373.94	3709.76	882.23	4478.15	-2135.15	-756.897	-2159.06	763.328	-1997.05	-2875.63	781.021	52.545	-2454.67	-4414.85	8533.32
26	fret	0.62383	0.60581	0.672903	0.549766	0.474756	0.545764	0.516755	0.713983	0.629838	0.595799	0.760092	0.597801	0.543763	0.667895	0.606811	0.631841	0.58579	0.752071	0.929675	0.89955	0.87345	0.842339	0.581787	0.455763	0.420784	0.578785	0.538761	0.517755
27	donor	2724.61	11373.1	64542.6	132959	127954	124246	129933	109917	111266	109745	109238	18065.8	-946.657	151.827	-2361.44	-2990.3	2882.22	-1188.44	446.686	-1329.97	-2395.22	-2534.07	-349.97	-956.843	-2373.24	-252.934	-2454.19	-961.132	-1667.72	-644.292	237.068	-122.66	858.951	2526.25	-1757.79	-367.661	1942.96	541.577	1301.78	3068.79	1418.65	-1509.03	-1951.86	-1792.1	517.988	-1190.59	234.923	-857.127
27	acceptor	94579.8	116520	53477	2600.78	-940.367	495.598	-2296.34	957.003	857.965	4969.9	-2784.4	-3059.19	2336.18	714.844	-368.201	3314.79	4043.5	-926.263	3609.4	-936.293	618.654	6365.95	2805.55	2666.66	400.162	2794.82	-592.171	6218.18	1722.45	658.349	-1145.52	5697.57	571.358	1583.65	3945.05	1984.88	1851.49	574.053	121.574	1183.03	98.952	-136.455	2196.69	-3803.01	5125.85	1055.01	654.221	-5448.42
27	fret	0.971638	0.910655	0.453624
28	donor	42275.9	34826	48315.8	55679	55528.8	61262.2	58528.6	46846.8	38336.6	31892.8	37279.4	45880.9	54320	58740.7	64257.3	49188.8	58900.1	50219.6	54745.6	52332.5	45007.9	46046.6	28009.2	42525.2	39448	41684.7	51600.3	48249.2	41859.6	47702.8	36457.5	27690.3	37304.2	32408.3	32634.2	50495.2	33779.7	30547.7	31491.9	45114.7	38739.1	41539.2	34401.9	34860.1	38982.1	40721.9	22718.6	45268
28	acceptor	36428	34720.3	33390.5	29187.7	28316.4	19094.4	26948.9	31305.7	29562.2	42680.9	33453.7	25676.2	22399.8	24022.8	30558.1	26115.2	29469.3	30418.5	32989.2	41851.2	35854.2	42261.4	41844	30225.4	30560.5	28307	40896.8	48522.5	53783.3	50989.9	35154.3	30753.2	29589.3	29881.7	30041.1	29984.2	22117.3	29796.1	29578.4	24654.6	25043.5	20119.1	27176.6	31260.5	25449.8	27665.4	61764.1	26174
28	fret	0.4627	0.498941	0.408614	0.343831	0.337289	0.23745	0.315034	0.400874	0.434972	0.572518	0.472702	0.358872	0.292129	0.290309	0.322422	0.346633	0.333561	0.376893	0.37594	0.444828	0.44384	0.478728	0.599096	0.415412	0.436939	0.40474	0.441866	0.500975	0.561987	0.516315	0.490838	0.526601	0.441866	0.479735	0.479735	0.372134	0.396053	0.493878	0.484774	0.353217	0.392205	0.326128	0.440879	0.472702	0.395091	0.40474	0.730715	0.366438
29	donor	14149.5	10875.7	21692	27150.6	16535.9	31957.1	28158.9	9282.46	33711.6	20939.1	16146	16132.6	32373.9	23950.7	15225.1	39109.7	23775.9	15399.8	18982.9	22740.7	59317.2	40145	31674.7	21248.3	17981.2	20582.8	23702	18989.6	10949.6	10761.4	17450.2	19708.9	16253.6	5450.7	9302.63	34007.4	17645.1	40629	20361	39734.9	32320.1	9860.59	30861.3	39587	23197.8	23749	13732.7	18061.9
29	acceptor	33240.8	37387.7	40057.3	37057	37557.9	21647.8	26716.6	29911.7	30287.3	37626.8	43672.6	28253	26615.4	26069.2	28430.2	23198.2	12548	42721.9	27261.9	34608.4	21871.8	30242.9	21900.7	41800.2	32091.8	42019.9	42262	32670.2	37987.2	36680.7	43993.8	40388.6	32620.3	46229.5	43900.8	35314.9	32661	14667.5	30013.8	28824.8	22094	38504	20706.9	13955.5	41366.7	25857.1	21926	29402
29	fret	0.700929	0.774468	0.649235	0.577303	0.694142	0.40383	0.486709	0.76279	0.472842	0.642808	0.729965	0.636425	0.450912	0.520709	0.651818	0.372326	0.345633	0.735595	0.589308	0.603927	0.269023	0.429542	0.408712	0.663532	0.641528	0.671422	0.64025	0.632617	0.775937	0.773001	0.716029	0.671422	0.667469	0.894321	0.825673	0.509594	0.649235	0.26494	0.595371	0.420525	0.405779	0.796739	0.401885	0.26088	0.64025	0.520709	0.615047	0.620033
30	donor	46408.9	49796.8	51677.1	39981.8	27668.3	34594.5	105030	100175	109646	97761	121525	111607	123722	113378	108909	124449	117274	124442	110253	111583	128714	141953	151235	129538	118320	107099	99294.4	96386.2	93368.3	95583.5	98081.1	101044	103229	101093	115009	115498	112792	111980	105017	99848.9	109171	110468	120352	104134	112095	108030	105325	102779
30	acceptor	64248.5	44783.9	66294.7	55320.8	78286.1	78908	6063.82	-3850.57	-816.788	-2531.39	-2507.03	-7044.29	-5810.06	-5117.11	-156.188	-4299.95	147.935	-5109.5	1945.34	-1326.71	-3831.14	7508.82	5425.7	-3457.43	-4612.89	-3976.16	-4467.46	-2813.86	-2810.41	-713.698	-2314.97	-5643.61	248.243	-4856.26	1194.42	-1550.42	-4604.27	-2221.64	-5246.53	-1729.77	3118.38	-875.171	-227.054	-2403.29	-648.465	-2618.43	-3580.2	-1536.57
30	fret	0.580355	0.473289	0.561723	0.580355	0.739317	0.695358
31	donor	98509.5	78752.1	90736.3	80012.4	101094	48346.9	20742.4	50825.8	67546.7	88964.9	67477.9	89498	112879	80012.4	150527	142823	104964	76140.5	80742.1	90077.8	84948.1	75877.6	106005	90257.2	99030.4	75148	90257.2	60218.1	23693	48017.7	87967.5	98204.9	92615.7	37814.6	84690.1	79533.3	81461.9	90249.8	90655.2	86633.4	84405.1	68440.9	96519.5	77437.7	53815.7	79363.8	91664.9	101856
31	acceptor	37149	42349.7	33409.2	31989	24747.6	41802.5	52396.3	46669.3	36323.2	26793.6	37214.6	35113	18451.1	15680.8	5964.97	11507	15163.4	25825.5	24167.8	22940	38358	37284.9	25543.8	16857.4	23771.3	23660.4	21912.4	49358	58604.1	56575.8	24804.4	37806.5	30559.7	57706.9	27403	26738.7	24714.8	20167.2	24060.2	24888	35493.5	27752.3	30360.1	29427.6	28590.9	41009.9	33514.7	29572.6
31	fret	0.274062	0.34953	0.269284	0.285382	0.196988	0.464011	0.716764	0.478697	0.34953	0.231085	0.355073	0.282123	0.140721	0.163833	0.0379744	0.074595	0.126329	0.2529	0.23035	0.203207	0.311341	0.329661	0.19425	0.157472	0.193568	0.23926	0.195617	0.450758	0.711923	0.541097	0.220186	0.278077	0.248312	0.604485	0.244521	0.251366	0.232575	0.182782	0.209506	0.223074	0.296115	0.288662	0.23926	0.275664	0.346779	0.340411	0.267701	0.225251
32	donor	16770.5	18392.4	18798.7	16252.3	18702.8	20070.4	11293.7	18477.2	19476.9	13833.7	55292.4	61756.1	45914.2	56055.3	74530.1	64265.8	77231.7	67220.2	67684	65550.2	75680.2	79549.5	68210.3	78832.9	75589	69886.6	64342.6	59084.9	67357.7	60745.2	60586.9	64822.5	65940.5	66562.8	58219.5	52373.2	62346.4	63957.1	38050.9	55645.9	47894.5	54577.4	59483.2	41581.1	46322.1	54321.4	59967.8	60433.3
32	acceptor	46335.5	45948.2	54993.6	34618.7	40767	34448.1	51402.3	40631.8	37889.9	38960.3	11287.6	761.841	-340.959	-3618.87	641.814	-4096.56	-3949.86	-4885.14	-778.277	768.605	-3461.82	2784.55	-5613.77	325.042	-2808.65	-2543.35	765.673	-2006.48	-3345.62	-1095.1	-151.563	4604.31	4125.77	29.092	1313.8	-2260.49	340.71	-2655.87	-2435.34	545.569	323.596	-765.214	2739.76	-510.554	1028.34	8680.97	590.378	-2997.85
32	fret	0.734031	0.714599	0.744877	0.680338	0.685668	0.631717	0.819597	0.687802	0.660155	0.738365
33	donor	34215.1	30539.8	30258	56447.6	37188.4	34211.1	34120.2	18355.5	54969	61901.5	62698.3	49009.2	63938.6	96980.8	81451.5	76226.9	83380.5	86666	85827.7	97917	101428	93673.1	103959	91741.1	93448.9	99580.5	102839	100666	103123	88548.5	81096	76783.4	85778.2	83194.7	79066.9	77754	85761	100624	85948.9	83875.4	82989.7	92836.9	82962.4	74167.6	86397.3	68488.5	64534.4	79204.3
33	acceptor	51444.5	48285.2	55822.8	31259.5	47125.1	49506.6	49862.3	60547.4	5787.4	3851.29	664.897	-3468.42	-1495.38	-219.122	5951.48	2731.18	-1695.23	-1124.64	2786.45	-643.009	822.065	2385.67	-4225.53	3256.56	-1212.2	-2693.45	-4019.77	995.093	23.357	192.645	3574.3	-3594.49	-292.986	-3312.79	5108.07	2728.55	-350.017	-579.403	-378.698	1010.49	2662.82	265.393	6218.34	-1145.78	-3228.22	2479.54	-2388.31	-3137.2
33	fret	0.600986	0.61246	0.648199	0.356647	0.559083	0.591352	0.593284	0.767116
34	donor	30908.1	33879.3	42499.6	38479.1	51139.9	86501.1	94618.3	83026.3	98259.3	60927.7	41300.5	40441	48444.6	54034.3	79489.4	75672.4	67289.1	57153.8	60528.2	58342.4	55788.6	50914.9	49377.2	44058.8	52039.9	52112.9	45856.1	53681.1	61037.1	63674	61966.5	68070.8	61235.3	63611.4	59685.5	53270.5	46683.6	44337.9	45272.6	52788.4	62536.4	60079.3	56782.7	46166.8	41513.9	63024.2	70172	68630.2
34	acceptor	52288.2	46422.1	29915.2	28502.5	36220.6	4066.64	-4424.77	-1333.67	5938.15	24685.9	21192.7	29796.3	30970.8	34249	33897.5	31648.4	33947.6	23547.2	24926	20025.4	23413.7	33368.5	37966.8	30565.4	22743.6	27332.5	15900.1	29100	25386.4	18274.5	22864	19411.2	22817.9	22004.2	28633.4	24681.7	25769.1	27953.2	24877.2	21755.2	29970.1	37168.4	34757.7	36475.7	38889.4	33343.3	26244	18206.5
34	fret	0.628206	0.577917	0.412687	0.425261	0.414787	0.0443866	-0.0489731	-0.0162206	0.0565795	0.288659	0.339049	0.424216	0.389456	0.388395	0.298602	0.295292	0.335795	0.291978	0.291978	0.255218	0.295292	0.395824	0.434648	0.409532	0.304108	0.344463	0.257462	0.352021	0.294188	0.222446	0.269766	0.222446	0.271996	0.257462	0.323825	0.316177	0.355253	0.386271	0.354177	0.291978	0.323825	0.382017	0.379887	0.440885	0.484082	0.345544	0.271996	0.2099
35	donor	12972.8	6398.75	7102.55	2607.72	7784.45	9455.02	18848.1	17381.2	13409.8	10921.9	10295.5	14979.8	6085.51	8927.81	13318.2	29812.6	24543.1	12355.3	19113.7	8530.79	9221.71	16919.8	15848.6	22577.3	20588.3	18119.9	15710.7	17600.4	17793.7	10327.7	12517.7	24846	17391.6	34539.5	71343.7	72282.1	90171.2	86483.3	80555.1	89778	96733.6	89962.4	103461	80439.1	84249.4	97517.3	88694	92980
35	acceptor	86834.5	73161.4	69558.6	79956.3	88493.6	91474.9	78608.1	79544.2	80695.7	84596.7	83201.2	77330.7	69614.4	76036.1	78047.5	66972.6	68111.3	80135	69615	112794	98056	83294.7	78183.4	70412.4	75569.8	68489.1	78940.1	59994.1	58466.6	58769.4	61721.1	57467.1	73662.5	67426.9	1928.66	3760.25	-465.049	2829.26	241.556	2304.06	-2970.9	-8027.28	-1363.54	-2649.76	-2550.21	-3167.96	128.743	-5276.3
35	fret	0.869766	0.919191	0.907082	0.96867	0.919191	0.906073	0.806297	0.820394	0.85767	0.885899	0.889933	0.837517	0.919191	0.894976	0.854646	0.691671	0.734874	0.866741	0.784154	0.929284	0.914145	0.831473	0.831473	0.756993	0.786167	0.791198	0.834495	0.773087	0.767051	0.850615	0.831473	0.697698	0.809317	0.661555
36	donor	24187.5	35449.1	34742.1	39935.7	36592.4	37508.5	41497	31411.7	28352.2	26939.6	23229.4	20898.6	25563.1	35298.2	32180.3	31797.9	35755.6	30808.5	33125.6	35634.2	38643.2	31125.3	37459.2	34950.1	31933.8	28452.5	39872.2	38960.9	35418.6	36402.9	37947.9	38419.8	34382.9	37980.4	37072.1	35675.8	31695	32056.9	35624.4	32544.3	32507.4	35868.3	34582.2	28544.6	17585.3	17698.9	24785.9	3661.97
36	acceptor	32296.5	23987.6	24719.7	25940.1	23403	24798	28351.6	26443.5	37414.7	29356.6	28029.5	30717.8	33310.9	25639.1	26823.7	24993.5	19989.6	25252.1	22808.5	22404.1	18601.7	32098.2	29921.4	20861	24999.8	25694.9	23649.2	25278.6	22702.9	22862.4	20184.7	23137.4	23561	22726.1	23487.4	23964.9	26046.5	22983.2	26325.2	24218.1	28135.5	23271.8	31114.3	31266.5	41935.8	41521.8	35399.7	56751.6
36	fret	0.571716	0.403127	0.415484	0.394063	0.390647	0.397469	0.405382	0.45726	0.568762	0.521497	0.546871	0.595085	0.565801	0.421061	0.455096	0.439841	0.358318	0.450756	0.407634	0.386079	0.325157	0.508089	0.444238	0.373447	0.438744	0.474438	0.372274	0.394063	0.390647	0.386079	0.347752	0.375756	0.406509	0.374602	0.388365	0.401997	0.450756	0.417718	0.424396	0.426614	0.46373	0.394063	0.473372	0.522523	0.704444	0.700934	0.588317	0.939513
37	donor	45190.2	37182.3	33673.6	36409.1	11087.7	11680.4	7775.92	10804.2	7636.01	11229.4	19911.1	31965.2	30128	10167.2	28613	39669.3	37513.7	36381.5	52119.3	35560.5	36033.6	35218.1	44741	38551.9	37852.4	33272.3	35462.9	37364.6	33158.1	46189.8	36762.6	48818.6	38145.1	40214.2	32688.7	40626.6	37933.4	36355.7	39612.3	33579.7	35157.3	27952.1	40413.1	40127.7	32885.7	34649.2	35126	39879.2
37	acceptor	24763.8	28731.1	32413.6	34317.4	63610.7	66858.4	69468.6	55230.2	69807.9	74451	64118	39097.7	43490.1	50024.1	52624	33776	38189.5	26939.9	29628.9	46557.8	30377.6	28292.2	31123.2	39002.6	41618.3	48040.7	26066.5	15532.4	29298.8	33381.4	24553.2	47699.9	33426.6	35102.1	46093.6	26626.5	31470.5	26045.6	31411.4	32498.5	36374.1	42789.3	31980	29237.6	42486.1	35730.2	30092	34354.1
37	fret	0.353884	0.436026	0.490853	0.484857	0.851471	0.851471	0.899338	0.835913	0.901424	0.869133	0.762611	0.550018	0.590344	0.830733	0.648101	0.459912	0.50486	0.425099	0.362757	0.567137	0.456923	0.445971	0.410218	0.502857	0.523901	0.590344	0.424106	0.293967	0.468884	0.419144	0.400311	0.493853	0.46689	0.465893	0.585294	0.396349	0.453935	0.41716	0.441992	0.491853	0.508865	0.604498	0.441992	0.421129	0.564114	0.507864	0.460908	0.462902
38	donor	126053	129895	126408	123342	103687	89261.6	103748	87403.2	121336	135154	146829	112231	136028	130715	110017	138386	126613	131797	148131	122300	125657	132480	133436	132088	129011	113827	125463	122853	134040	115247	136103	120815	119363	106519	117170	129446	103342	118436	118763	108777	111911	120801	107343	116128	120107	113169	96368.2	128907
38	acceptor	22757	18744.1	21210.4	5828.14	11295.3	12224.5	4380.03	7837.11	7571.91	9654.86	7453.31	8486.06	6107.7	6126.1	12967.2	7169.17	8980.11	12182.7	9717.82	29574.4	27636.7	9154.67	15828.4	4608.87	11521.9	18474	10431.7	10130.6	13471.4	14241.6	19462.7	11858.8	11602.5	7819.95	18486.1	12927.1	13186.2	7787.33	16624.6	17170.6	23409.2	14120	20988.4	12578.6	6053.24	11734.6	9829.49	11321.4
38	fret	0.153225	0.126248	0.143437	0.045079	0.0981666	0.120637	0.0402748	0.0823513	0.05867	0.066443	0.0483076	0.0703743	0.0429381	0.0445405	0.105351	0.0493884	0.066443	0.0846644	0.0614325	0.194885	0.180195	0.0647674	0.105954	0.0339403	0.0817747	0.139571	0.0766134	0.0760431	0.0910786	0.110195	0.124996	0.0893214	0.088737	0.0681242	0.136369	0.0910786	0.113245	0.0614325	0.122501	0.136369	0.17333	0.104749	0.163848	0.0975722	0.0477681	0.0940203	0.0928364	0.0806233
39	donor	24883.4	26262.3	28214	16312.4	27616.4	30981.3	29000	36581.1	16506.9	29778.2	22064.8	31521.3	21671	26413.3	27463.8	33294	19915.4	25759.6	32456.7	18925.6	29678.6	55740.1	49169.1	54446.8	51878.8	54800.1	58434.2	50518.5	58163.4	54625.8	45545.9	41535.1	50057.8	41160	48809.6	63455.1	57414.8	57897.3	66219.2	61175	61523.7	61010	60261.4	57416.4	48499.9	64119.7	55699.7	54144.9
39	acceptor	25622.2	31091.4	33147.7	39136.3	19442.5	25338.6	26091.5	24892.1	30185.3	25688.7	39996.7	32305.7	30139.1	31017.9	23003.5	29168.8	30751.1	33320.7	28120.1	39694.6	35179.1	-4077.11	2191.57	769.952	-3386.55	2741.56	2262.42	939.976	1870.57	-3667.14	2590.7	1161.63	-7408.69	310.231	-205.132	1541.7	-801.357	1510	689.971	3392.74	1082.48	3386.45	-101.48	-1450.41	-449.704	-5905.86	-3676.46	319.007
39	fret	0.507525	0.542442	0.540455	0.70598	0.413277	0.450016	0.473318	0.405068	0.646396	0.463203	0.644459	0.506523	0.581984	0.540455	0.456108	0.467252	0.606503	0.564237	0.464216	0.67726
40	donor	46303.9	41772.5	28850.6	72301.5	100839	99172	99809.1	105338	97852	95954.7	105662	97881.3	102909	104373	103377	106190	107688	105489	109782	109427	102227	104427	103793	103500	105666	111586	101569	102809	109602	98451.6	103259	110395	106935	100336	96214	108183	106157	94896.4	90636	93861.5	105686	101873	98844.6	91741.3	106179	102335	111628	101454
40	acceptor	61589.6	53895.1	69187.5	14739.6	-7985.49	-2254.71	-7181.39	-421.958	3884.04	-2448.97	-5891.66	-1873.88	445.375	-6674.39	-4013.68	3553.34	1760.19	-2388.68	5704.44	-5705.21	-2799.34	2050.24	389.192	627.408	-6138.79	-534.042	3356.11	-2483.88	-7451.76	2197.76	-2286.89	4483.54	-11358.2	-421.275	-1517.26	-3594.04	-8098.39	-4067.08	-7591.79	1702.49	1230.06	3220.89	-2864.66	-4630.86	-5743.94	-4542.57	-5610.74	-5664.13
40	fret	0.571251	0.563383	0.705707
41	donor	48001.6	40756.9	39495	40377	44766.1	55306.7	48680.6	49105.8	53603.2	52626.6	48861.6	41420.7	52671.9	47448.9	54837.6	51625.4	46215.8	61273.2	59222.6	49688.7	44820.9	49126.3	36474.8	60089.5	49735.3	50690	50004.2	46630	43557.7	51757.1	48334.9	46204.9	46484.7	44115.9	56014.5	53413.9	52351	45561.6	49362.3	51866.8	41396.1	54688.1	56295.6	13541.8	11731.3	18262.8	18242.2	11669.6
41	acceptor	29260	36152.4	34178.6	36496.8	32433.5	22774.5	29616	20266.3	35659.7	24219.2	23069.4	36761.8	33132.2	24441.1	14011.7	25317.9	30472.1	14110.3	25694.3	19450.1	28942.4	26886	37953.6	12539.6	25657.2	32779.6	15268.3	25119.5	25409	23994.3	17627.9	31675.7	29072.6	27915.9	13083.1	26092.9	26525.9	30076	29009.6	27612.5	32818.6	23647.1	27675.6	64274.5	68161.8	58337.4	61647.3	54483.4
41	fret	0.379068	0.470288	0.464306	0.474278	0.420581	0.291817	0.378083	0.291817	0.399798	0.31525	0.32112	0.470288	0.385972	0.339735	0.203598	0.328952	0.397821	0.187228	0.302549	0.2811	0.391892	0.353479	0.510278	0.172812	0.340716	0.392879	0.233539	0.350532	0.368232	0.317206	0.267482	0.40672	0.384986	0.387946	0.189152	0.327973	0.335812	0.397821	0.370201	0.347586	0.442414	0.301572	0.32993	0.82614	0.853291	0.76176	0.772109	0.824055
42	donor	36165.9	18024.6	5995.6	18488.1	34317.4	36020.7	31642.4	34945.6	24449.6	40443.6	57713.6	69438.3	63247.9	59190.8	57071.4	65652	75176.4	62703.4	77505.1	72412.1	74394.6	60031.2	71175.1	78945.9	69558.4	60249	68483.4	77186.8	76061.5	59341.5	72953.8	63041.3	57853.3	72521	66470.1	75690.2	67204.5	64764.1	63063.6	62971.5	78624.8	64096.7	70368.1	73327.9	61217.9	70049.8	92502.3	64046.5
42	acceptor	30368.1	65570.4	75433.7	61195.8	30409.2	30741.3	36023.6	43958.7	32420.3	14844.5	-2378.55	1316.97	6160.25	2398.38	-159.842	2022.3	2996.04	-3670.74	-4610.14	1613.3	2160.06	-2946.14	-2481.55	2314.98	783.573	2990.13	-1868.53	-2242.94	2591.89	-965.025	-1518.06	-832.744	1164.88	7835.88	1177.59	930.793	3609.84	-1474.9	-3889.68	6763.6	2967.46	7549.4	7319.44	844.136	10.265	-2034.86	-294.205	-773.669
42	fret	0.456859	0.78439	0.926419	0.767887	0.469841	0.460844	0.532012	0.557057
43	donor	15559.5	18360.2	18950.1	10660.1	23191.7	20623.3	17953	22993.3	15107.9	12826.6	22841.9	12463.7	17676.3	19459.1	14095.1	11406.6	13766.2	17149.1	21844.8	13343.4	15165.3	12941.4	8882.54	11176.9	15637.8	14719	11116.9	17712.9	15995.4	17759.9	11633.7	20858.2	11236.9	22202.4	14173.4	14784.2	14912.1	16298.1	16050.2	15100.1	13228.5	22366.9	8365.72	12322.8	15653.4	18407.2	21184.4	18665.6
43	acceptor	36227.2	25371.6	17876.3	18826.6	8730.83	10708.4	35898.9	18338.7	17938.4	25454.5	22665.1	27851.2	25618.9	11520.2	17250.1	33823.7	21977.6	30880.6	25488.6	23572.6	21830.6	30196.5	19882.6	8513.76	11761	20743.2	34575.5	19578.7	15348.4	2894.76	17009.3	21176.5	15954.4	14055.8	21418.3	26768.4	15936.5	13876.4	26580.9	8649.37	25926.3	25453.2	17009.8	13058.7	22149	15813.5	16536.1	21639.8
43	fret	0.699722	0.580583	0.485305	0.638948	0.273275	0.342038	0.666855	0.44348	0.543136	0.665008	0.49765	0.690661	0.591263	0.372115	0.5501	0.747751	0.615274	0.6427	0.538144	0.638948	0.590295	0.699722	0.69157	0.432859	0.429659	0.584475	0.756504	0.525093	0.48943	0.139844	0.594163	0.503788	0.586417	0.387505	0.601872	0.644573	0.517009	0.460336	0.62383	0.364368	0.662235	0.532133	0.670541	0.514982	0.585446	0.462431	0.438178	0.537144
44	donor	36719.6	24950.1	23782.9	39593.7	30220.4	31121	25154.9	22427.1	28607.7	34086.1	32385.7	16974.8	30711.3	27528.3	18984	34811.1	36589.6	26474.9	40026.1	21828.9	18997.1	26868.3	29505.1	35198	32356.4	33458.6	32798.6	35620.7	32766.1	35464.6	37386.1	21793.1	27297.5	29921.3	32798.6	25769.4	31267.3	31426.6	42753.9	24312.8	29391.3	37035	22618.9	34541.3	37161.8	26409.9	29898.5	27239
44	acceptor	39405.2	32334.7	30789.9	38730.1	31366.4	28960.9	26406.2	33648.6	36508	32712	29406.5	38103.2	31223.5	27699.1	43528.7	30495.6	30104.7	34331.2	33070.6	48978.6	41275.4	35912.9	35594.8	23990.6	29859.2	23702.1	21961.7	30266.7	25077	41789.8	32280.8	27539.7	26105.3	25566.5	37592.6	36886.3	32237.5	39991	24855.2	34502.9	27765.6	24886	31098.2	34977.3	35364.6	34264.1	34867.9	22900.4
44	fret	0.517901	0.564215	0.564215	0.494854	0.508874	0.48186	0.511882	0.599651	0.560176	0.489854	0.47587	0.691564	0.503864	0.501861	0.696704	0.466895	0.450966	0.564215	0.451961	0.691564	0.684374	0.5723	0.547061	0.405365	0.479863	0.414264	0.401413	0.458926	0.433088	0.541022	0.462909	0.558158	0.488854	0.460917	0.533977	0.588496	0.507872	0.560176	0.367909	0.586469	0.485856	0.401413	0.579381	0.502862	0.487854	0.565225	0.538002	0.456935
45	donor	62996	59584.5	61175.2	55489.1	49002.4	58354.2	41686.7	54555	52580.9	52592.4	45643.4	55222.2	42408.5	52885.6	47319.2	44838.6	59771.5	53471.8	60044.7	57962.3	45832.5	49830.3	51035.4	52187.9	39219.8	54460.5	31051	47576.6	60969.2	53807	64031.9	54909.1	66966.4	58237.6	62057.7	59193.7	61219.3	71984.3	66724.7	51642.6	62414.9	57251	45852.5	38907.7	63765	56186.7	59966.9	52835.1
45	acceptor	52429.4	59893.4	68786.5	60547.9	65330.6	71514.2	70832	65953.4	56186.8	76995.4	66443.5	55619.3	75593.5	74854.2	69825.1	68604.4	57567.2	58939.9	64041.2	59398.2	61291.3	51131.3	60803.8	63855.5	72866.3	58061.1	54547.1	66022	54074.7	64212.4	54435	37851.2	39832	53256.9	23082.9	24806.4	23141.6	38065	33343.1	46946.2	46542	50259.1	58608.5	80867.9	52765	59322.6	43366.8	47937.4
45	fret	0.453907	0.501512	0.529544	0.521559	0.571141	0.55041	0.629646	0.547437	0.516559	0.593695	0.592718	0.501512	0.640256	0.585868	0.595649	0.604435	0.490432	0.524556	0.516559	0.506535	0.572125	0.506535	0.543469	0.55041	0.649872	0.515558	0.637366	0.580967	0.470191	0.544462	0.459004	0.407669	0.373343	0.47729	0.27142	0.295054	0.274653	0.346045	0.33337	0.476276	0.427271	0.467144	0.561286	0.674735	0.452886	0.513555	0.420063	0.475263
46	donor	61884.6	66258.1	47384.1	68379.2	51406.7	51150.2	48510.7	43647.9	49408.4	52495.6	67447.7	60244.2	52531	57544.1	44928.7	61822.4	33542.9	68033	43891.7	46819.2	48335.3	51108.6	48486.3	51299.7	51650.6	57151.5	56081.6	53251.6	80111.9	119949	130005	132568	123825	123748	128777	122318	120489	120630	136351	118716	117504	123496	128573	121473	124227	118760	127192	122051
46	acceptor	58239.5	39198.4	60535.7	37623.2	70893.9	58970	62207.8	77851.4	68894.2	80111.6	44216.5	57024.8	57848.4	57126.8	64412.5	58621.6	89702.1	62882.8	77532.4	76017.8	80315.4	77245.7	66128.8	86756.8	66647.2	70369.9	74099.3	65347	33816.1	415.533	-8023.85	-8008.1	-6286.44	-428.497	754.15	2837.34	-2310.42	-5262.22	-2716.9	-3957.26	-8543.51	-79.207	-1150.32	-6303.01	-4326.27	8033.75	-1760.29	-784.321
46	fret	0.48454	0.37154	0.560738	0.355387	0.579378	0.535964	0.561723	0.641006	0.582307	0.603663	0.396087	0.486579	0.523973	0.497763	0.589125	0.486579	0.727491	0.480455	0.638157	0.619076	0.623865	0.60173	0.577424	0.628631	0.563692	0.551852	0.569587	0.550862
47	donor	15520.9	20593.8	20107.2	23307.2	19923.7	23502.9	22753	21061.3	14070.2	17786	15765.8	18703.3	22419.9	19041.8	25646	15474.9	24749.5	18562.8	18133	19867.7	17433.7	19867.7	21186.4	26748.3	23895.2	20014.3	27419.1	15085.7	26594.7	16584	23588.1	22130.5	24745.7	21113.5	25585.4	21753.6	21157.2	21142.7	23664.9	13908.2	21130.4	27703.1	29827.8	26006.8	28481.4	34678.1	35623.7	28849.1
47	acceptor	60164.8	58081.3	59080.9	52407.2	39506.9	7726.96	40028.5	49472.7	58155.9	53742.5	53552	58710	57880	53496.1	62017.8	63230.8	53780.4	65492.5	63113.9	61676.5	60205.8	60114.3	76930	61163	50471.8	62357.6	53615.3	47931.7	58468.8	59341.3	60624.8	66957.9	54606.2	59350.2	60121.1	58271.4	35522.5	62485.1	54264	44946.7	33712.1	51571.5	40373.5	43545.9	46902.3	39330.8	43967	49321.2
47	fret	0.794836	0.738528	0.746194	0.691868	0.665075	0.24783	0.637467	0.701573	0.804883	0.751682	0.772628	0.758281	0.72108	0.737435	0.706979	0.803765	0.684341	0.779273	0.777056	0.756079	0.775948	0.751682	0.783711	0.696177	0.678977	0.75718	0.661876	0.760483	0.687565	0.781491	0.719993	0.751682	0.68864	0.737435	0.701573	0.728701	0.626917	0.747291	0.696177	0.763791	0.614308	0.650165	0.574736	0.625865	0.621657	0.53162	0.552071	0.631133
48	donor	40413.3	44493.9	39370	43377.8	33846.6	35661.9	46607.5	42115.1	37897.6	41355.4	45444.6	61725	70972.6	82428.8	87418.2	97665.9	74788	88282.7	78861.2	83596.6	70496.6	77949.9	83869.1	74136.9	82897.4	79836.6	81265.9	77926.5	82846.8	79921.7	79935.3	77137.2	89771.1	102238	75712.9	76142.1	84408	82061.3	75333.1	76404.7	73254	90496.2	78559.1	78604.7	82876.4	87939.8	3939.68	-3324.95
48	acceptor	37019.6	40193.5	40710	29583.1	48751.3	44186.9	32161.7	34813.6	46912.4	32020.9	48102.6	22074.8	-369.786	-2491.82	-2856.4	-927.306	-2197.39	584.655	3616.73	-2250.7	1444.25	-5382.84	733.109	-1086.38	-2476.44	-276.907	-357.36	-3151.49	-578.28	466.734	-1458.95	-304.256	-4186.8	-957.07	-4383.11	-4225.06	-3204	-4932.05	3327.01	-2853.47	248.825	-2873.56	-1785.97	2330.34	846.915	438.887	-2118.28	3250.04
48	fret	0.478381	0.474355	0.508477	0.405481	0.589922	0.553318	0.408537	0.452165	0.553318	0.435971	0.514476
49	donor	25005.4	8690.28	18541.8	22591.8	12161.4	22205.4	30670	7926.78	245.643	3221.12	16126.7	24943.8	28953.7	21261.8	27951.6	40784.8	27516	20227.4	26630.9	25368.7	30431.4	32166.2	27917.8	18666.5	24066.4	14124	20649.2	37672.3	16722.4	15129.2	34535.2	17321.2	18383.3	22751.8	14468.8	20162.7	22390.1	22096.1	23615.4	25702.7	30057.4	20678.4	19411.5	30357.6	29432.4	33257.6	27325.1	32409.5
49	acceptor	31669.2	46247.8	34635.1	48760.3	13624.9	33965.8	38982.1	54391.5	79219.2	53606	44107	26984.8	34570	46042.7	32867	36603.4	33712.6	39537.5	38684.6	33524.9	29232.3	27317.2	44153.2	43800.8	32603	36902	37459.9	54592.2	43299.9	37090.5	53054.1	24597	27840.7	30288.1	25584.9	30523	41613.1	47151.2	52258.5	47449	34055	51193	52110.9	42974.1	35932	33167.1	29974.5	35546
49	fret	0.559211	0.841962	0.65128	0.683447	0.528448	0.604201	0.559211	0.872645	0.99669	0.943095	0.731884	0.519449	0.544371	0.684387	0.540399	0.472967	0.550317	0.661731	0.592539	0.569058	0.49024	0.459681	0.612924	0.701247	0.574948	0.723555	0.644607	0.591565	0.721704	0.710566	0.606139	0.586689	0.602261	0.571023	0.638873	0.602261	0.650328	0.680625	0.689082	0.648422	0.531441	0.712426	0.728191	0.585712	0.549327	0.499339	0.523452	0.523452
50	donor	38993.4	48419.2	55783.5	52400	53966.3	58822.3	63271.6	59392.9	58758.7	65366.6	63316.8	56262.1	58079.3	55542.5	55355.1	62327.9	69479.6	72714.2	59986.9	71020.8	51580.1	64622	74255.3	68012.1	35713.7	44222.5	16575.9	9857.53	13500.4	13689.4	78.6463	1231.56	-423.35	2183.68	6415.51	12730.6	23972	17665.3	31190.7	16709.8	12317.3	692.755	4051.11	7712.34	10399.7	12931.4	11420.4	7836.16
50	acceptor	34676.8	44604.5	33181.5	18109.6	17950.4	17782.6	24635.7	12593.5	21590.2	29526.1	24836.9	20290	18767.4	33691.6	28485.2	16091.3	16932.3	16211.4	18149.8	18264.1	19040.8	24640.4	10753.1	17813.4	39780.9	23436.8	61239.2	61723.3	67299	68574.2	61474	71643.8	67694.5	68934	58248.2	59820.7	53802.5	49910.2	31695.8	56408	64776	72594.1	80179.9	53369.2	52322.4	67229.8	68131.1	60691.3
50	fret	0.470417	0.47949	0.372536	0.256789	0.249395	0.232454	0.279952	0.174833	0.268384	0.311359	0.282052	0.265225	0.244108	0.37768	0.339451	0.204796	0.196254	0.182341	0.232454	0.204796	0.269437	0.275749	0.126288	0.207995	0.526593	0.346707	0.78737	0.862149	0.833327	0.833327	0.999101	0.982886	1.0063	0.969329	0.900918	0.824913	0.692139	0.73905	0.503602	0.77132	0.839844	0.9901	0.952097	0.874184	0.83426	0.838913	0.856583	0.885266
51	donor	50733.9	65388	53806.2	58064.9	57458.8	62501	44540	38553.8	60684.8	57140	54182.2	55146.4	51019	51637.5	38301.2	45157.4	58540.8	32494.6	49444.2	53270.7	66300.6	70183.3	64726.9	44922.8	62771.5	77884.7	77001.3	77471.6	61853.3	64976.1	75608.3	80875	61928.5	62974.7	57861.7	61378.5	38146.3	60744.3	79603.2	75547.6	60854.3	89170.2	73301.5	49557.6	89417.1	21692.9	71861.4	73253.3
51	acceptor	36819.4	15558.2	34771.3	33743.3	28262.4	35841.1	52286.8	57620.2	28171.9	35665.8	36238.5	40035.3	43919.4	49656.8	69695.2	52464.4	36987.9	48332.7	42373.8	52490	45410.3	29795.4	37815.4	61124.1	33774.4	23359.1	23705.7	29869.2	38983.3	38543.2	20454	18145	29308.3	25846.6	34456.6	37738.3	56015.1	36013.8	14743.8	13402.8	36187.2	25411.5	36856.8	47433.4	12319.4	81755.5	34363.9	24751
51	fret	0.420168	0.192637	0.392698	0.367154	0.330173	0.364081	0.53977	0.59918	0.316764	0.384534	0.40085	0.420168	0.462653	0.489807	0.645308	0.53778	0.387597	0.598195	0.461645	0.495825	0.406957	0.29815	0.369198	0.576476	0.349717	0.230454	0.235688	0.278439	0.386576	0.372269	0.212625	0.183146	0.320893	0.290895	0.373292	0.380449	0.595238	0.372269	0.156706	0.150344	0.373292	0.22207	0.334292	0.488803	0.120565	0.79016	0.323988	0.252407
52	donor	58560.3	83535.3	85025.6	77389.7	78676.9	78968.7	88333.6	74109	70896.4	76448.8	90785.3	71680.5	71647.7	77140.2	117792	121581	123524	126257	129061	125920	118658	115755	125901	135899	134646	144267	127083	112161	117412	114814	125593	126696	132984	130044	125911	139640	135932	127614	135482	160347	138702	129914	137875	128724	123175	127471	130104	128342
52	acceptor	55866.5	42391	42208.5	47070.3	49459.9	39689	34613.8	44266	45824.9	54765.1	43739	59664.7	69154.2	41905.9	73.822	-5425.52	-1630.68	879.195	-9543.62	-4240.21	-224.619	-216.938	-969.525	1348.01	-1464.12	612.651	-3781.69	562.598	1192.36	-2354.2	-8496.12	-3685.67	413.003	-1807.3	-131.98	-37.05	-1879.46	-3272.04	-7081.62	-235.583	3794.3	-6374.93	-4122.16	-7286.35	-2924.12	5800.08	3637.67	3195.53
52	fret	0.488209	0.336793	0.331588	0.378225	0.386465	0.334712	0.281304	0.374103	0.392636	0.417233	0.325333	0.453876	0.491225
53	donor	66709.1	68158.7	62554.5	64409.8	69419.1	74045.9	74194.6	82134.2	74338.3	79123.8	70801.6	63063.4	70747.5	63061.2	72898.8	56578.5	74414.8	61403	68193.3	69497.1	65385.8	66174.9	82083.7	84621.2	74536.1	3758.91	65641.4	68028.7	66292.5	73248.2	70736.6	75211	60844.2	63565.1	71610.1	81341.5	67399.9	62405.7	65660.8	63435.2	76472.2	56268	71115.6	68463.3	62862.7	58593.3	58170.3	69230.7
53	acceptor	24561.9	20823.4	19769.5	25896.6	11454.2	14325.4	13422	10879.2	7753.17	-740.997	10687.4	16172.8	12221.1	20129	19461.7	17893.4	15273.5	26011.4	23091.7	15342	24286.9	21360.1	10793.8	12946.3	12112.6	100560	16067.3	17827.2	21834.6	10763.7	21173.4	5996.63	24468.4	8905.6	9789.24	6735.74	14994.1	11750.5	21845.3	20306.4	10123	23746.2	5591.37	18716.1	17317.2	23359.8	31035.3	11215.2
53	fret	0.268977	0.234545	0.240129	0.286575	0.14128	0.16203	0.152827	0.11687	0.0945948	-0.00976124	0.130845	0.204195	0.14706	0.242359	0.210966	0.240129	0.170057	0.297515	0.253482	0.180342	0.271183	0.243473	0.115702	0.133167	0.140122	0.963589
54	donor	158167	138380	126611	139859	123678	123924	119554	160846	196264	194909	206917	191449	175312	185046	182746	146325	173188	174367	180376	176234	195473	170137	190772	189465	171799	160317	166893	181236	182293	138509	173196	167887	174490	188124	176131	173328	178644	190783	190436	184973	177338	176206	181763	188350	195351	158707	169863	174284
54	acceptor	44963.4	43840.7	39893	41968.7	36549.6	42443.2	60297.6	-1374.14	-3178.85	-3595.33	-608.13	-6034.11	365.456	-870.764	-5624.51	-3768.69	-929.383	-2595.43	-4093.68	3109.28	-3406.4	-5456.27	-2366.65	1884.54	-1815.85	-1129.96	-5375.02	2313.62	-4669.51	-2346.42	-934.369	-106.033	-574.949	-3411.38	1009.55	-2355.23	-3277.6	46.091	1586.08	-2219.18	2038.09	145.81	-875.242	-2547.8	-41.208	1920.18	510.514	2471.53
54	fret	0.221076	0.240935	0.239266	0.230961	0.228481	0.255222	0.334967
55	donor	38583.3	43798.2	50565.4	56394	58850.5	69367.9	57706.7	84005.8	128059	130764	109000	112632	121072	128481	298078	309305	291463	292762	289348	280655	262551	223300	216865	200211	208454	238725	216331	210405	87683.6	212941	226266	223201	241177	239995	234959	213569	212360	206094	207736	209404	203655	196145	231782	229874	228124	241695	213689	182939
55	acceptor	130283	129475	128119	126823	134381	125710	125096	125129	115349	112177	115705	126842	111838	108424	2847.16	2900.11	-4717.24	4042.78	-1964.01	981.879	-1210.8	1964.65	530.914	-6920.91	615.874	-3204.47	-2374.64	-2127.95	-2313.71	-5459.1	-2574.32	-4757.51	1602.3	-5818.16	138.598	-1409.41	293.885	-1986.46	-2755.26	-3533.72	-7198.86	-8588.21	-6703.01	-785.106	2123.48	-643.923	-62.67	-3086.21
55	fret	0.771858	0.747526	0.717169	0.692694	0.695245	0.64408	0.683809	0.598706	0.474265	0.461895	0.514465	0.529683	0.480508	0.457806
56	donor	51375.1	46477.3	56203.5	50916.1	65625.6	54703.1	56434.4	54420.7	54104.3	57928	51286.8	56366.5	58721	55573.5	53713.3	61929.6	53953.6	50773.5	50592.9	63542.7	55148.5	60301.5	57086.1	54400.3	54362.3	43731.8	37921.6	59920	47664.1	49896.4	62444.2	62942.5	59257.3	62535.2	59279.1	58981.7	50265.7	44822.1	64995.6	57099.7	39637.9	37443.6	43566.1	48920.1	47841.9	39909.4	50334.9	40983.5
56	acceptor	69850	63235.5	77247.1	71819.7	58066.8	58595	63455.2	55010.8	58034.3	67279.5	71394.3	66891.2	50755.8	65084.1	53168.8	59390.3	54932	69332.9	54551.1	66961.8	60378.7	56356.8	61165.2	64173.4	60328.3	71088.2	76911.8	70360.6	62866.4	76814.3	65869.5	55984.4	62424.8	60021.1	61411.8	65030.7	67525.5	70388.3	70438.1	72861.3	77958.3	88223.9	74198.1	74439.4	70258.6	84704.8	63893.3	91295.5
56	fret	0.576364	0.576364	0.57838	0.585439	0.469071	0.517067	0.5291	0.503045	0.517067	0.53713	0.582413	0.543156	0.464084	0.539138	0.497042	0.489042	0.504046	0.577372	0.519071	0.513059	0.523082	0.483047	0.517067	0.541147	0.52609	0.618781	0.669502	0.540143	0.568304	0.606645	0.513059	0.471066	0.513059	0.490042	0.509052	0.524084	0.573341	0.610689	0.520074	0.560248	0.663403	0.702092	0.629919	0.603613	0.594522	0.679672	0.559241	0.689859
57	donor	18894.8	26125.1	20369.2	24118.8	14816.7	18138.5	20263	31317.9	23372.8	18100	26911.8	23153.2	25806.1	20274.6	16226.1	23569	21770.4	19899	20073.3	25303.8	18696.5	22394.3	22461.1	27726.7	26308.4	26702.4	29798.5	24446.4	26219.7	21609	26131.5	22573.3	24887.5	28017.9	24842.5	29000.3	23094.1	26310.5	23065.4	26300.3	31006.5	19381.7	21286.1	33531.4	25598.8	25224.5	22955.7	20582.5
57	acceptor	53828.6	41829.9	54814.7	57849.1	54289.2	49587.6	66580.3	40626.4	49970.4	58752.6	52363.4	47849.9	36226.9	46862.2	64796.6	38830.7	51087.3	47901.2	44436.2	46673.7	53640.4	49378.6	42591.3	61909.9	48234	47424.4	35741.4	36544.4	49466.4	49086.4	44804.6	49471.9	56056	29681.7	40465.9	33833.4	38849.9	38686.5	44616.9	46939.1	36828.3	51417.5	70085.7	49263.2	49945.5	46551	38054.8	39317.3
57	fret	0.740383	0.61521	0.728659	0.705629	0.785895	0.732023	0.766643	0.564728	0.681176	0.764212	0.66056	0.674034	0.584443	0.697827	0.800014	0.622757	0.701302	0.706492	0.689083	0.648729	0.741215	0.688204	0.655117	0.690838	0.646897	0.639532	0.545642	0.598982	0.653296	0.694339	0.63118	0.686444	0.69259	0.514772	0.619934	0.53852	0.627445	0.595125	0.659655	0.640455	0.542596	0.726127	0.766643	0.595125	0.661464	0.648729	0.623697	0.656026
58	donor	88314.3	93762.2	101217	89268.6	101423	87676.9	94304.9	63363.4	91218.7	77708.9	56452.6	58115	68572.7	76190.4	74825.9	89642.2	92337.1	96065.8	76230.8	75424.2	62255.1	66337.3	51143.6	128222	110276	139119	130572	130350	127222	128566	131926	122173	129053	129504	125270	127715	130530	130703	128602	127669	127869	123446	131911	117338	125908	136752	133821	126972
58	acceptor	41101.7	43247.1	36050.9	35375.9	40048.2	51280.1	41378.5	58495.8	46901.7	55857.1	62972.5	64256.6	51178.6	47795.9	50357.1	40587.5	33003	35233.4	46899.6	62916.8	53497.2	40613.5	44802	270.287	2278.05	-2974.37	-5137.27	-1801.03	-322.657	-5186.84	-3948.17	-3215.75	-4455.48	-4669.9	-3172.61	-8520.18	-4606.04	-1130.61	-2709.82	-2300.97	-3024.39	-2635.77	-4083.97	-2607.11	235.874	-4902.81	-6755.57	-3411.8
58	fret	0.317252	0.31531	0.262176	0.283371	0.283371	0.368938	0.304644	0.479696	0.339625	0.418124	0.526808	0.524795	0.427021	0.385614	0.402339	0.311429	0.263138	0.267947	0.380704	0.45479	0.461753	0.379723
59	donor	25021	22398	10470.8	10647	8735.82	10992.3	9635.27	62711.1	70303.1	62821.9	23321.6	13838.4	10598.7	9646.64	7307.8	14831.6	6657.01	8863.71	7675.82	6576.02	13160.6	34.0813	767.278	1844.34	680.602	3367.57	-89.5392	1872.76	797.118	-1239.07	-3431.55	-1850.06	647.921	2060.32	301.215	-1403.89	184.7	-71.067	-649.383	653.605	-3477.02	-2870.29	318.267	-3273.83	-1220.6	-471.768	2175.42	-5057.09
59	acceptor	99289.3	101794	108200	119934	114207	107612	118350	60918.1	68377.2	57267.1	101815	91636.2	125729	118064	121609	112043	122668	121875	121372	116375	120900	8820.27	6510.35	8131.65	6474.64	6150.55	4597.42	3544.74	11238.9	4785.55	1007.73	4301.49	10477.4	7246.31	4347.21	3425.97	5713.22	5380.98	3436.78	8474.59	4754.96	2698.17	5141.93	6293.79	6461.61	5421.87	4254.6	1027.01
59	fret	0.798954	0.81949	0.911988	0.918778	0.928473	0.907135	0.924596	0.493161	0.493161	0.477138	0.813624	0.869224	0.922657	0.924596	0.943003	0.882846	0.94881	0.93235	0.940098	0.946875	0.902281
60	donor	35546	60735.5	49664.4	37631	40710.1	51661.9	51032	46211.7	53729.3	50653.3	56950.4	60979.4	52300.9	51835.8	41826.7	50870.5	59215.5	47920	45351.4	49345.3	44736	40870.6	44829.6	44130.8	45534.6	47164.7	43111	56447.2	42589.2	42772.4	52814.5	50028.7	34538.5	43322	53700.5	48359.5	48549.8	50016.3	38434.7	55764.9	33077.2	52904	68719.3	29633.8	54038.1	38555.1	52967.8	57822.1
60	acceptor	29358.6	29707.6	20150.9	41293.7	33911.9	18698.4	36427.6	37174.2	29717.4	24237.4	30632.5	24287.1	35994.6	39192	38610.1	34724.5	31680.9	33846.5	37626.8	48440.7	31115	33730.9	29175.9	49467.2	60125.4	51571.7	36675.5	28308.2	37320.4	46650.2	38569.8	26507.9	39373.6	29354.1	30737.3	38913.6	32662.7	40113.8	43021	36968.4	49665.2	30885.5	13720	48141.1	51133.9	71357.7	40997.5	22539.4
60	fret	0.451856	0.32888	0.288256	0.523215	0.454892	0.266246	0.416299	0.445778	0.355781	0.32369	0.349586	0.285118	0.408136	0.430552	0.48012	0.406093	0.348553	0.414259	0.45388	0.495196	0.410178	0.451856	0.393818	0.528202	0.568904	0.522217	0.459948	0.334064	0.467017	0.521219	0.422412	0.346486	0.533183	0.404049	0.36403	0.445778	0.402004	0.444764	0.528202	0.398936	0.60044	0.368153	0.166542	0.619069	0.486156	0.649313	0.436648	0.28093
61	donor	41366.1	38637.8	36912.5	40878.2	28546.4	24777.8	38063.8	44748.7	31431	43187.6	32940	32188.3	46651.7	32479.3	35609.5	29984.2	40752.5	40040.4	44335.5	28767.2	33874	45004.6	38401.2	40884.9	35052.5	41297	36369.1	50488.4	42346.5	35654.8	42997.4	37399.3	25401.5	39058.9	35028.7	49802.3	40011	43774	40440	31925.7	45518.5	42358.9	42339.7	43896.3	42984.9	25376.6	42148.3	48678.2
61	acceptor	52494.4	46601.3	41847.5	55279	49404.3	64248.8	38138.5	59036.8	60262	50336.5	51786	59584.5	48625.4	58729.1	51686.2	35374.2	51174.1	55780.6	52939	53924.7	54685.8	37072.1	49614.7	44474	43837.1	40571.4	36516.8	36065.4	52487.6	56933.4	60096.2	55156.8	69251.5	46046.1	54495.2	36878.1	33706.4	41641.6	51144.6	68092.3	49283.5	63073.4	47094	51831.8	59821.4	58884.5	44013.2	41798.7
61	fret	0.559438	0.54627	0.531128	0.574667	0.633973	0.72211	0.500966	0.56857	0.657677	0.538191	0.611399	0.64942	0.509997	0.644266	0.591981	0.541216	0.556398	0.58179	0.544248	0.652515	0.617546	0.452074	0.563495	0.521055	0.555384	0.495956	0.500966	0.416446	0.553359	0.614472	0.582808	0.596063	0.731529	0.541216	0.608328	0.42533	0.457042	0.48795	0.558424	0.680451	0.520049	0.598105	0.526089	0.541216	0.58179	0.699157	0.511001	0.462015
62	donor	81839.7	134571	92864.4	96278.9	74948	70028.8	124072	108803	83214.1	61536	75329	86025.8	118487	88543.2	39761.4	45780.2	70048.1	178376	401383	241274	239504	209126	206333	263265	259716	268358	210534	230987	224857	235800	198164	10511.7	977.138	2216.58	-7501.2	12816.9	6904.26	16511.1	-2451.82	10704.6	-3792.53	26619.5	3581.41	11456.9	6002.41	8963.56	3745.38	4647.23
62	acceptor	161587	105565	152850	120959	157837	149247	139751	135769	159146	163483	135115	135083	134431	119410	165278	178265	145475	92241.5	-10862.3	-6047.19	-9447.13	829.442	21.19	1570.13	-879.554	-7337.34	2123.16	3678.24	-2845.38	10199.7	-120.966	2034.65	-1747.3	156.563	-4076.81	7135.99	715.978	-8472.54	-1349.27	-4399.27	12407	-3235.68	565.529	5924.71	1293.05	7987.46	-861.431	-5706.65
62	fret	0.664275	0.439142	0.621724	0.556898	0.678019	0.680794	0.529797	0.5557	0.656133	0.726437	0.641405	0.611413	0.530917	0.573853	0.805955	0.796419	0.675252
63	donor	11242.3	34501.9	13204.1	14428.5	24800.3	16984.6	22391.7	29899.1	33036.1	14611.7	11389.8	24621.6	19625.6	23374.8	14330.2	22186.1	18910.6	31409.5	83787	149959	175002	137407	177160	180463	162226	167124	153244	163647	173340	174242	160090	116851	114290	131544	125073	116207	112744	118066	124300	110939	103646	122061	110809	112494	110380	130530	117316	118947
63	acceptor	164103	109074	155686	123870	159579	151115	143352	138531	160866	165138	137392	137230	137939	121696	166162	179060	147270	97444.3	322.774	-3181.77	-7616.49	3026.44	576.165	4042.85	2172.86	-4164.31	3756.58	5643.19	-1476.59	11926.7	802.446	-2108.22	-6133.48	-4854.2	-9185.83	3100.91	-3397.26	-12447	-6246.87	-8305.93	8262.24	-7001.79	-3592.07	1984.78	-2760.92	3258.49	-5265.46	-10141.5
63	fret	0.935147	0.759859	0.921615	0.895049	0.865931	0.898334	0.864337	0.822181	0.82986	0.918258	0.923297	0.848524	0.875548	0.83915	0.919935	0.89014	0.88688
64	donor	19163.1	13582.1	29637	19530.3	18723.6	22194.2	25203.8	7867.88	21327.7	17042.5	12106.7	29093.6	30885.3	29574.8	9457.43	16266.4	19786.7	22773.8	22433.7	28282.4	54717.3	38261.5	20680.3	24507.9	24367.8	16229.1	21040.7	24071.8	18131.6	15132.1	31213	14845.2	24635.6	26768.5	29215.6	16712.7	12379	4656.01	19250.1	18740.6	14593.3	26056.8	35468.7	38327	33654.3	24135.1	30135.2	28796.4
64	acceptor	50887.6	40952	38086	52949	32828.2	33007.3	38700.4	49116.9	38674.9	30544.7	20107.2	26150.5	16208.7	40819.8	56893.6	48170.5	48803	42156.7	29389.1	39569.1	26372.2	24973.9	35628	35911.7	35117.2	45356.4	52192.7	48130.8	46605.7	61937.8	33043.1	44077.7	46675.2	45111	42911.8	51658.8	46685.5	41783.3	46019.4	36688.6	47792.4	34590	41256.8	20111	14246.9	20273	32736.1	26336.8
64	fret	0.726257	0.751356	0.562812	0.730619	0.636773	0.59789	0.605565	0.862133	0.644232	0.64144	0.624565	0.473155	0.344563	0.579488	0.857385	0.747922	0.711316	0.648895	0.566754	0.583382	0.32491	0.395366	0.633029	0.594036	0.590172	0.736702	0.713083	0.666362	0.720125	0.803426	0.514617	0.747922	0.654443	0.627392	0.595001	0.755634	0.790191	0.89999	0.705114	0.661782	0.76587	0.570684	0.537918	0.344563	0.297906	0.456227	0.520733	0.477356
65	donor	55623.9	54688.3	50790.1	45051.2	46233	56224.5	57600.9	49653.2	57300.6	49176.9	55049.5	51083.7	53937.9	59513.6	47999.3	58528.1	47986.6	42308.6	45538.5	45605.3	43275.5	43196	65660.3	39886.7	45367.6	48069.6	46890.3	53322.9	62524.3	57434.2	59549.1	50497.4	54478.5	61567.6	67464.7	53339	64389.7	60153.1	54928.5	56747.3	59160	56451.2	52957.5	63339	59481.4	54227.2	53009.9	60485.6
65	acceptor	50735	51663.3	61252.7	73878.1	61547.3	60700.5	71766.8	58714.9	59181.6	69410.2	68669.5	49587.2	53782.4	67982	78713.1	81294.2	54989	73611.9	82586.3	58416.4	60671.7	60585.3	40971.7	61194.3	47244.6	45611.8	54002.1	46959	55912.9	57432	59815	61445.2	65183.8	64604.3	68192.6	53587.6	66047.8	59029.8	55494.5	59733.9	62290.3	60430.6	61397.1	56992.2	70208.9	62254.1	61289.5	65998.3
65	fret	0.477392	0.48551	0.546646	0.620977	0.571318	0.518749	0.554565	0.541685	0.507713	0.585039	0.554565	0.492594	0.49966	0.532732	0.620977	0.581126	0.533729	0.635413	0.644994	0.561476	0.584062	0.584062	0.384421	0.605494	0.509723	0.486523	0.53572	0.468231	0.472306	0.49966	0.500668	0.548628	0.544662	0.511731	0.502682	0.500668	0.506708	0.495624	0.502682	0.512735	0.512735	0.516746	0.536715	0.473324	0.541685	0.534724	0.536715	0.521752
66	donor	58999.7	76420.3	87165.5	65766.2	68597.5	67510.3	63140.3	73290.6	71802.4	62042.5	87283.2	76565.5	80348.5	80428.2	81648.1	89140.7	57090	71892.7	82205	51049.4	70792.2	80570.7	78295.4	70836.5	104194	80855.8	86734.3	74167.1	98916.5	89593.1	80537	77094	81407.3	76554	81531.3	76052.9	69984.8	84705.2	79686.2	58725.2	68092.9	65809.6	67343.9	60784.5	67864.5	70142.4	78259.1	71266.8
66	acceptor	6495.22	16615.2	12969.1	15178.8	12138.8	11306.8	13730.5	14032.1	13780	12374.9	7758.84	13315.8	10073.2	12807.8	12954.9	8583.71	4720.57	4212.65	10829.6	21381.3	10573.3	14078.6	10436.8	15830.7	16882.2	15546.1	14825	10475.4	8296.09	18972	7358.33	18430.3	12783.6	20108.3	17283.7	18609.8	33549.5	17534.8	24258.7	26561.1	22726	13659.6	21373.1	14193.7	29721.8	33734.8	21695	23826.5
66	fret	0.09919	0.179005	0.129651	0.187437	0.150074	0.143566	0.179005	0.160319	0.161251	0.165917	0.0817431	0.148213	0.111166	0.137068	0.137068	0.0881631	0.0762475	0.0552422	0.116704	0.295621	0.129651	0.149144	0.117628	0.182751	0.139852	0.161251	0.146354	0.124098	0.0771629	0.174326	0.0835765	0.19307	0.13614	0.20812	0.175262	0.196828	0.324511	0.171521	0.233628	0.311008	0.249762	0.171521	0.241213	0.189315	0.30427	0.324511	0.216607	0.250713
67	donor	88641.5	127898	126905	111244	101733	100449	117262	99339.9	81763.4	104365	106070	113414	118691	129385	99867.1	124280	94920.2	83713.5	76303.4	102451	114452	93737.7	84183.4	82839	93914.5	90232.6	88542.5	81255.8	66432.4	64476.8	60251.2	61612	63481.3	99237.7	101979	78370.6	83585.4	86576.7	87640.5	105481	70264.4	89232.4	85018.6	86876	86071.5	98122.8	86279.7	93245.1
67	acceptor	28068.8	21410.6	22619	41810.3	33857	33407.9	27503.1	28142.8	50810.6	48962.2	36597.9	26357.9	30877.7	18147.8	30886.5	26958.7	30714.9	19147.8	17917.6	38595.3	45882.6	54598.3	58397.2	28366	27423.5	43239.9	35885.2	36968.3	54074.5	56913.2	56787.6	57942.1	47282.7	38396.3	66012.6	30689.7	48762.4	43239.7	44824.8	40276.7	37106.3	56430.7	44712.9	48734.4	48997.1	46334.2	53969.2	60769.2
67	fret	0.240566	0.143727	0.150797	0.272788	0.249632	0.249632	0.190162	0.220413	0.383327	0.319055	0.256681	0.188144	0.206299	0.122508	0.236537	0.178054	0.244596	0.186126	0.190162	0.273794	0.28587	0.368274	0.409405	0.254667	0.22646	0.324081	0.288888	0.313024	0.448485	0.468509	0.485521	0.484521	0.426445	0.278826	0.393359	0.281845	0.368274	0.333125	0.338148	0.276814	0.34518	0.38734	0.344175	0.359239	0.363255	0.321066	0.384331	0.394362
68	donor	39749	43488.2	38797.9	26994	31769.8	31090.1	39236.1	50065.8	39028.5	13437.2	25452.7	19710.9	13045.1	17168.3	14491.4	10350.5	35605.4	25695.6	12218.8	21421.8	24193.6	21603.6	25171.9	37780.3	29970.7	44123.2	30001.9	52343.8	34826.6	43822	45570.8	35807.5	28475.6	28000.7	39656.7	43876.2	45869.3	37552.3	34825.3	24237	35119.7	39290.4	40944.3	24979.2	30475.5	28436.2	27014.3	40359.5
68	acceptor	74563.4	86773	86353.1	87233.1	85263.3	74804.2	89057.5	53540.8	75163.7	93445.2	74518.5	100598	96839.5	91622.1	128572	126055	79388.7	100192	89148.8	68670.1	80258.7	61399.3	85631.1	57791	62071.9	80735.1	66491.9	53501.2	48046.1	50959.1	45405.6	61161.2	53292.6	48222.4	54783.9	66636.3	67958.7	63019.6	60471.9	66998.4	53888.8	58730.8	53351.8	64048.8	66654.9	68502.5	50625.3	34396.1
68	fret	0.651832	0.665739	0.689561	0.76385	0.728221	0.706421	0.694523	0.516302	0.657793	0.87435	0.745052	0.835932	0.881239	0.841846	0.898944	0.924495	0.690554	0.795475	0.879271	0.761872	0.768794	0.740103	0.772749	0.605083	0.674676	0.646863	0.689561	0.505306	0.580178	0.53728	0.499306	0.630956	0.651832	0.632945	0.580178	0.603091	0.597116	0.626977	0.634933	0.734163	0.605083	0.599108	0.56622	0.719305	0.686585	0.706421	0.651832	0.460268
69	donor	100034	92733.3	93087.7	87439.8	68656.9	83807.9	91506.6	94597.5	78397	93410	89725.2	101592	88696.4	77968.9	83644.5	76914.8	75865.3	65717.8	86931.1	76275	76873.4	74914.8	78937.9	85306.2	85651.5	79092.1	87837.9	81644.5	71508.5	74413.1	89950.7	95446.8	86783.8	83982.9	85292.4	84026.6	95304.1	84931.1	71354.3	88560.6	83607.7	79545.5	79883.8	76242.8	80997.8	89748.2	79543.2	92998
69	acceptor	17152.5	22967.7	22148.3	26911.2	22002.1	21830	25828	22518.7	24264.8	21762.9	27091.8	24743	31824.5	18875.6	28733.7	22173.5	29652.5	28920.4	30680.6	27980.4	34212.9	30603.7	33637.8	29843.6	23002.7	29636.8	25988.3	20141.9	30954.5	22300.3	26161.2	22669.4	23610.9	31154.1	24814.5	23117.8	29534.5	15951.6	19386.7	16788.7	21119.9	18431	23618	19079.1	29614.8	25647.3	20336.3	19638.8
69	fret	0.145991	0.198875	0.19225	0.235059	0.242758	0.206367	0.219786	0.19225	0.236766	0.18895	0.231651	0.195558	0.264377	0.19473	0.255688	0.224016	0.281041	0.305975	0.260895	0.268743	0.307773	0.289894	0.298805	0.259157	0.211386	0.272236	0.228252	0.198045	0.302385	0.230801	0.225709	0.19225	0.213902	0.270493	0.225709	0.215583	0.236766	0.158007	0.213902	0.159617	0.201367	0.188126	0.228252	0.200536	0.267868	0.222325	0.203865	0.174202
70	donor	41170.2	44754.8	35095.8	31995.3	22659	22529.9	25022.2	50737.4	20489.4	31220.8	50501.5	61545.7	44283.1	29512.9	37536	10470.4	49173.5	15961.5	9373.21	10629.3	19441.8	53969.4	37590.6	9797.7	19228.3	84525.2	54334.4	17696.7	73555.5	11776.2	9834.94	33867	9437.76	48458.5	33710.6	22599.4	23748.8	29319.3	58509.7	53783.3	32673	21651.1	41907.5	19987.9	13580.9	34676.3	42150.8	16204.8
70	acceptor	54963	59399.9	73615.7	71712.6	72176.1	69585.3	71356.3	55703.9	78298	72951.8	72311.7	49560.5	63399.6	70829	59310.4	79954.4	60728.1	72337.2	90066	82239.9	74308.8	59970.6	69290.3	78339.5	79924.2	48772.3	53177.7	72502.7	46956.3	63090.2	89391.7	68926.2	74149.4	58738.7	71318.4	86774.1	80041.1	81235.3	58543.1	49521.2	76955.4	86949.4	71946.2	91922.3	79848	62954.7	66105.7	75145.3
70	fret	0.571184	0.569924	0.676413	0.691062	0.761761	0.755367	0.741158	0.523553	0.792813	0.699943	0.589044	0.446468	0.589044	0.705919	0.612647	0.883994	0.552513	0.819869	0.906436	0.885843	0.792813	0.525962	0.64808	0.889552	0.806235	0.365855	0.494662	0.804546	0.389669	0.842491	0.900773	0.670713	0.887696	0.547613	0.679309	0.792813	0.771445	0.73492	0.500355	0.478961	0.701433	0.801177	0.631524	0.821588	0.854918	0.645296	0.609988	0.823311
71	donor	29859.4	36942.8	32614	30311.8	31298.2	34625.2	19804.5	38220	37973.8	31763	22888.4	38557	38623.2	36333.4	34665.3	34860.7	23830.2	40602.2	38132.3	33029.5	33460.3	30079.5	37846.1	23739.4	37042.8	28505.2	33578.8	21872.8	34903.8	36542.7	29613.2	30031.8	38332.3	37028.9	42979.7	31401.3	36485.7	41413.1	44253.9	37662.9	49496.7	38327.7	45464.9	40291.3	37609.1	36065.6	42105.6	34152.8
71	acceptor	45383	38054.9	35434	41073.6	37256.8	42329.6	49292.8	44612.2	40519.2	42340.6	51505	33729.8	44243.2	41744	35466.2	26670.6	41385.8	41199.1	37885.6	48162	37818.4	49140.7	30720	53909.4	53293.8	49764.2	40484.6	59594.5	35520.4	40299.8	51178.4	47995.3	24343	36842.1	35977.6	43519.9	38632.8	42017.5	28771.2	37949.1	31862.2	31231.9	30797.8	42278.7	42949.9	34189.9	41256.9	44200.5
71	fret	0.603057	0.507073	0.521087	0.575611	0.542997	0.54994	0.713538	0.539024	0.516088	0.571674	0.69267	0.466728	0.53405	0.535045	0.50607	0.433098	0.634146	0.504063	0.498035	0.593274	0.531063	0.620575	0.448424	0.694572	0.590336	0.636081	0.546966	0.731459	0.504063	0.524083	0.633179	0.614743	0.388801	0.499041	0.455553	0.580526	0.514087	0.504063	0.39398	0.502055	0.391909	0.449443	0.404315	0.512084	0.533055	0.486958	0.495018	0.563786
72	donor	121625	124229	122803	103686	126942	108317	115864	132578	88094.3	205965	189470	233864	214652	167480	221874	184239	175914	184417	173824	205725	177422	188180	182584	161966	221939	192466	194687	177485	185659	172096	182656	206980	173644	168062	170273	187355	190966	177725	180276	150811	187435	181979	173069	190751	174824	64328.2	-3351.76	1589.51
72	acceptor	63698.9	60534.2	64028	66343.8	62382.3	63193.1	69304.5	62737	80105.5	-3147.26	587.553	-3803.26	-5715.33	-1151.41	-1745.23	-3808.54	-1296.88	-4844.95	680.765	-3087.33	-1842.13	6179.9	-2833.31	-722.503	-2847.24	-6400.08	-6034.93	192.728	86.026	-2868.16	-3583.27	-1528.04	-4472.65	-3577.08	-2146.31	-687.146	-1266.49	-5683.54	370.789	-1994.39	-4721.55	-4080.98	2045.76	-1653.08	-7542.98	3163.71	-3614.97	253.462
72	fret	0.344108	0.328018	0.342304	0.390618	0.32979	0.368883	0.374496	0.320973	0.4764
73	donor	44702.5	29870.7	38665.3	46058.8	12773.1	31531.5	38109	41640.6	44193	36556.7	35832.3	41086.3	47882.8	36665.2	31672.8	39401.6	15535.5	35401.4	32340.5	78249.8	71240.4	88633.5	75150.1	58801.8	79716.6	80493.7	81199.2	77082.6	82452.1	77767.2	70979.7	78877.7	83727.8	82314.7	78237.9	64140.5	75462.6	72278.3	75635.7	62627	60562.2	80583.3	77690.6	66994.4	88584.8	85403.5	86862.3	80483.8
73	acceptor	35834.6	53751.1	38593.7	38841.3	71652	39384.9	28430.6	48900.3	38328.7	31350.2	35436	31259.8	34132.1	24886.3	44612.5	36489.5	57721.8	32460	47360.3	-7528.44	-2577.8	434.525	-2460.6	-8879.53	-3520.51	-6936.15	-3501.9	-4140	-7661.23	-256.613	-6704.2	-2635.32	-7841.1	-2734.66	-4541.95	-692.488	-5224.54	-3143.51	971.403	-1289.73	-2828.16	-1276.76	-5649.15	4202.69	-5818.21	-2610.5	-1620.72	-6869.17
73	fret	0.444449	0.642861	0.499577	0.457376	0.848664	0.555462	0.427016	0.540459	0.464859	0.461657	0.497499	0.432488	0.416004	0.403787	0.58495	0.480754	0.787821	0.478645
74	donor	62392.6	53036.7	29363.4	27578.2	16875	22201	45787.2	46731.7	39910.9	47350.6	43966.2	34478.1	41139.5	49877.1	52472.7	52138.5	60621	50320.6	55447.6	57185.9	56347	42441.6	44924.2	53762.5	47332.1	55690.4	21256.5	22283.1	13178	27101.3	36341.1	41026.5	61477.8	57746.2	45853.3	48062.2	56144.4	53410.4	49037	55210.4	21077.3	26324.2	8556.86	11835.7	10054.8	6601.79	7985.48	26832
74	acceptor	49308.4	41797.8	66369.1	62940	82301.6	65312.2	50433.7	36214.5	57186.7	53589.6	57053.7	59358.4	56727.1	45889.5	26157.7	50760.7	35250.2	39285.7	49893.9	41687.7	44011.3	54518.9	44844.1	44467.7	65202.4	58275.5	64829.4	67231.1	59210.2	58644.6	63321.8	47392.4	36887.9	36585.1	51225.4	60912.3	54042	38328.6	30591.9	47835.4	66718.6	81133	109191	100938	95711.7	98879.7	88997.1	67959.8
74	fret	0.441599	0.440571	0.693452	0.695335	0.829526	0.746643	0.52367	0.436457	0.588882	0.530656	0.564352	0.632516	0.580075	0.479372	0.332782	0.49354	0.36774	0.438515	0.473279	0.422012	0.438515	0.562381	0.499591	0.452879	0.579095	0.511655	0.753107	0.751261	0.817836	0.684016	0.635402	0.535636	0.375104	0.387692	0.527664	0.559421	0.49051	0.417873	0.384551	0.464117	0.759555	0.754951	0.927376	0.895146	0.904767	0.937748	0.917834	0.716905
75	donor	5135.97	2121.28	3847.82	3984.66	1235.2	5214.53	4420.52	5266.05	5271.12	4343.65	2386.51	3385.78	6098.91	3495.59	1910.95	5152.86	2395.8	4776.13	-1996.57	2807.17	6532.24	-1423.03	20805.8	43117.3	47191.3	44724.8	42921.4	23282.4	6300.8	4208.5	6174.09	3379.87	42466.9	45952.1	5405.43	2824.91	560.299	-1069.95	3400.14	309.427	3238.8	-453.326	1791.85	-3315.97	-2103.84	4945.92	1249.56	-928.884
75	acceptor	79749.5	81061.8	81851.1	81372.7	84112.9	67912.1	78060.4	72487.8	78430.2	76910.4	68715.9	82420.5	88736.6	77366.3	64832.2	82475.4	81516.8	86559.3	78662.1	86656	75096.9	73953.4	62791.5	42085.9	32270.6	47193.2	39464.8	55989.7	89163.4	88368.7	72843.8	64066.6	31894.2	34811.9	969.185	-5639.39	3529.05	-1195.86	353.415	2727.29	-2113.74	-115.015	-3.51	-5505.42	4455.09	3103.95	2271.75	3642.87
75	fret	0.93923	0.974702	0.954726	0.952906	0.985561	0.92826	0.946529	0.93192	0.937403	0.946529	0.96654	0.960183	0.935576	0.956546	0.971076	0.941056	0.971076	0.94744	1.02605	0.968355	0.920015	1.01978	0.751	0.494019	0.405872	0.513057	0.478936	0.706089	0.933748	0.954726	0.921849	0.950174	0.429332
76	donor	43417.2	54959.6	29272.5	27679.9	45389.5	44129.4	49198.7	51189.4	11969.2	42167.3	36359.2	29165.8	40205.3	37765.1	15601.9	24578.8	43879	48966.7	49502.4	54428	46520.4	41065.2	32482.4	42567.5	38497.8	40266.9	38079.1	38440.3	41083.7	44406.4	29644	51550.6	40069.9	48172.5	36722.5	27287.9	43497.3	42267.9	20552.1	31101.1	20582.9	43634.8	41537.3	34103.7	48482.4	41192.5	39690.2	34867.2
76	acceptor	49749.5	34115	48546.4	23659.8	41645.5	57820.5	40406.7	28810.5	58747.7	31043.3	18765.4	48195	38485.4	36188.8	67237	49461.7	34129.2	33682.9	42346.2	33354.3	38494.9	33669.5	32559.5	39747.9	39970.6	44168.2	42541.8	48080.2	50586.7	29069.3	38806.7	33051.3	39790.5	25235.2	38178.6	22264.3	37894.6	45507.5	50184.2	62659	58649.5	48566.2	38818.7	40189.4	28643.6	46097	39658.7	30534.3
76	fret	0.533498	0.383473	0.62347	0.460497	0.4785	0.567492	0.450496	0.360461	0.830282	0.424489	0.340449	0.62347	0.4895	0.4895	0.811307	0.668444	0.437493	0.407483	0.461497	0.379471	0.452496	0.450496	0.500501	0.4825	0.5095	0.523499	0.527499	0.555494	0.551495	0.395479	0.566492	0.390476	0.4985	0.343451	0.5095	0.449495	0.465498	0.5185	0.709413	0.668444	0.740385	0.526499	0.4835	0.540497	0.371467	0.528499	0.4995	0.466498
77	donor	40277.5	41802.2	38158.6	53678.3	44862.8	41914.3	48708.1	30255	54481.7	52400.2	56260.5	30632.4	50442.1	45860.5	17029.9	45789.5	34474	65061.1	39724.4	34216.2	36122	40509.2	35938.9	47258.2	47108.7	49283.6	54070.6	40449.4	45217.8	24843.8	55053.5	38480	43345.6	38140	37867.2	20845.3	31510.6	29765.4	23405.1	46742.5	38898.6	31712.4	42504.7	67123.9	33547.2	5183.68	33614.5	36768.5
77	acceptor	41510.1	33623.1	28267.3	53731.8	35320.6	36172.8	42521.2	27423.6	36696.7	36056.2	47867.2	66458.1	37688.4	32968.8	75045.5	37289.7	33642.1	30427.5	35451.9	24719.6	46647.5	41534.8	34077.9	32053	46613.2	36280.4	23742.4	29289.1	25516.3	60183	55634.4	40273.5	43601.8	40431	24830.8	52769.5	39728.8	44610.8	51585.7	41559.8	35609.6	57133.2	44765.2	29255.2	45725.4	57772	43030.4	56206.7
77	fret	0.507319	0.446252	0.425584	0.500232	0.440328	0.463115	0.466103	0.47509	0.402182	0.408011	0.46013	0.684962	0.427545	0.417757	0.814644	0.449219	0.494174	0.318309	0.471092	0.419712	0.563734	0.506305	0.487126	0.404123	0.497201	0.423625	0.305239	0.419712	0.360823	0.707952	0.502255	0.511367	0.501243	0.514416	0.396367	0.716766	0.557516	0.600325	0.688234	0.471092	0.478093	0.642805	0.513399	0.303372	0.577261	0.917587	0.56166	0.604542
78	donor	11105.9	16312.1	14367.4	13403.2	1400.14	14187.4	14831.6	16746.6	2791.35	15822.6	12660.8	1690.28	11855.8	22595.6	51702.4	55672.2	40662	14400.1	10378.3	14708.1	14053.5	10744.3	17216.8	15568.2	10394.6	11870.7	8493.08	10640.2	12473.3	9190.91	27066.8	13136.9	8597.23	20735.7	16553.2	16764.5	11893	8765.37	14601	23318.8	18575.3	11333.5	3566.56	5798.44	8103.24	13767.8	15483.3	13129.5
78	acceptor	54640.3	36603	61281.2	61879.7	61197.1	51316.4	49490.2	35944.5	57984.8	37099	55539	53848.5	68548.9	32908.5	10255.2	3874.11	18312.4	42562.3	56379.7	42959.4	38699.4	47547.5	52784.6	45039.7	49070.4	58914.1	61444.9	68254.7	42303	55132.6	42371.1	62076.7	54359.8	38232.3	48022.7	43932.6	62090.1	54589.5	58832	33920.9	44892.4	46923.1	52037.7	49412.4	57401	42406.4	43848.8	38193.8
78	fret	0.83145	0.6921	0.810399	0.821462	0.977897	0.782897	0.769775	0.682516	0.95363	0.700642	0.81482	0.969789	0.852632	0.593338	0.165551	0.0649646	0.310978	0.746934	0.844813	0.744767	0.733951	0.815926	0.754531	0.742601	0.824788	0.832561	0.87845	0.864955	0.771959	0.857108	0.609941	0.824788	0.863833	0.648661	0.743684	0.724247	0.839238	0.86159	0.801574	0.592303	0.707063	0.805984	0.936399	0.895393	0.876197	0.754531	0.739354	0.743684
79	donor	66082.3	54711.7	61696.5	23989.8	13561	9940.35	23261.4	7058.9	5597.7	7384.33	19319.6	21481.2	15035.1	11910.2	18007.1	17483.4	16634.3	18578.2	18507.1	21155.8	12981.3	19069.6	24515.7	33862.6	60347.4	18755	24166.6	24272.2	18457.5	45851.8	28377.8	35300.1	74914.1	35888.5	47884.1	37849.7	45347.5	44455.3	67662	69500.4	48655.7	68547.8	80340.8	78259	71543.5	81896.9	82284.8	88659.8
79	acceptor	14237.7	30517.3	18102.7	57627.2	71532.3	77955.9	63086.3	61363.6	81427.3	74202.9	72552.2	64381.5	69369.2	66279.4	60652.9	62094.4	80435.1	66995.9	73951.4	63992	66187.3	63557.6	62566.6	47382.6	34122.1	67376.9	58347.4	44268.1	54498.7	35293.9	54625.7	55415.7	11574.9	50560.2	33280.6	48703.9	36981	37198.9	14444.8	17725.4	24256.8	15276.1	5602.45	11098.6	10551.8	9393.43	6914.18	1308.16
79	fret	0.177065	0.358152	0.226676	0.706371	0.840825	0.8874	0.730879	0.896739	0.935217	0.909203	0.789309	0.75032	0.822251	0.848057	0.770823	0.780062	0.828439	0.783144	0.799593	0.751345	0.835662	0.768771	0.718618	0.583654	0.361115	0.782116	0.707391	0.646358	0.747248	0.435442	0.658537	0.610916	0.133483	0.584662	0.409616	0.562498	0.449374	0.45535	0.176094	0.203301	0.332514	0.181918	0.0650882	0.123823	0.128652	0.102602	0.0775779	0.0143228
80	donor	18005.9	19099	12972.6	17119.4	15650	15863.4	18939	13061.5	13807.1	20026.6	34333.2	51720.7	47688.9	46900.8	52586.8	57557.2	53374.8	52627.8	54648.5	58820	56843	59107.3	56234.2	53831.8	51350	48831.3	53972.7	53013.6	54021.9	55093.2	54223.1	56365.5	46393.2	55574.8	55858	52039.5	56600.9	61706.7	48764.2	53816.7	61076	50269.2	57870.5	56470.9	56291.7	51224.1	51418.4	53477.4
80	acceptor	29625.9	39375.9	37937.9	31130.1	32804.6	35620.9	39048.2	26517.1	42023	37931.4	24394.2	-4271.39	3851.56	-3083.73	-2835.2	-4645.28	-6986.87	253.402	-4481.59	-5828.5	-4154.04	-6881.1	-4027.32	-124.886	4955.11	-7021.31	307.04	2890.46	1308.15	709.874	-6253.8	4086.74	-935.143	-4841.68	-5275.15	-1349.55	-4113.26	-5532.93	-3995.83	655.127	-7707.59	-1991.31	-2636.39	691.048	-6224.62	-4900.22	-1769.12	-3470.64
80	fret	0.622198	0.673498	0.744843	0.645431	0.677092	0.69206	0.673498	0.669921	0.753086	0.654573
81	donor	77092.5	67139.1	81307.2	64063.6	61629.7	62255.7	55350.5	62796.1	62041.8	74888	56827.9	44740	56967.9	47275	47290.5	49961.6	44261.7	52415	52232.3	54662.3	63523.2	50319.3	65754.9	63935.3	72038.1	68908.2	57835	50715.9	55774.3	56202	56376.9	57154.5	53841.9	77306.4	115934	90350.8	99067.9	120479	92135.5	119033	114049	97835.4	104056	108951	134383	87267.6	92761.4	111821
81	acceptor	28637.2	25566.8	22078.8	22932.8	27492.2	32498.2	39836.5	28624.6	41030.7	40240.2	35288.7	35051.9	56923.9	31351.3	25156.5	32296.2	36287.4	31210	40004.1	38115.6	23250.1	23435.8	21533.2	24351.2	16103.8	11043.2	15524.5	20641.4	29604.6	32783.3	33523.2	22977.8	38476.9	22243.4	7210.92	9120.95	3568.7	3027.19	3557.21	2654.4	331.265	585.991	45.83	-3941.3	-3611.91	-8099.75	-29.985	-5708.92
81	fret	0.270836	0.276099	0.213551	0.263872	0.308064	0.342645	0.418424	0.313466	0.398128	0.349112	0.382861	0.439017	0.499552	0.399088	0.347261	0.392383	0.45092	0.373403	0.434086	0.410658	0.268226	0.317984	0.246598	0.276099	0.182955	0.137991	0.211879	0.289325	0.346337	0.368699	0.372461	0.28667	0.416478
82	donor	50037.6	34816.2	32563.3	32824	35526.3	54477.2	49971.4	58442	36170.3	50267.2	48634.9	45658.3	34534.1	42827.7	39298.6	44220.6	56691.1	38964	38321.9	43714.8	29343.6	29676.3	37934.8	43946.3	29238.5	40749.9	31154.8	29759.9	52068.7	36343.4	51848.8	32226.8	45393.7	27040.1	30493.4	41224.6	39876.4	62480.8	40792.7	43403.5	33479.7	35699.5	43316	29970	36981.5	43072.8	53979.1	49411.2
82	acceptor	12761.7	25884.7	48916.2	31858.9	28383	2496.35	4897.13	7190.42	4894.01	4319.78	2237.42	-5990.51	18797.8	18933.2	5064.25	4389.16	-3200.83	17937.4	41514.2	35978.8	30129.4	40989	25303.9	35863.8	27315.1	28563.3	33727.6	38788.5	24278.3	16447.6	23513.1	26230.2	20418.5	26011.8	18976.7	36241.7	19417.3	8128.38	5587.97	15594.6	34541.7	34717.9	24236.4	32005.5	34537.3	46519.8	-405.546	12178.2
82	fret	0.203055	0.426581	0.600639	0.492469	0.443915	0.0438456	0.0894654	0.109342	0.119246	0.0794936	0.0438456	-0.150586	0.352351	0.306329	0.113748	0.0905721	-0.0603023	0.314734	0.51953	0.451032	0.506523	0.580016	0.399929	0.449	0.483409	0.412251	0.51953	0.566213	0.317882	0.311588	0.311588	0.449	0.310538	0.490457	0.383442	0.468264	0.327311	0.114847	0.120345	0.264047	0.507525	0.493475	0.358588	0.516532	0.483409	0.51953	-0.00791681	0.197662
83	donor	48033.5	34880.6	45418.4	42906.9	45315	47591.4	47358.6	24674.4	16866.9	18752.9	32761.8	47753.7	48851.9	51267	35628.5	59472	32418.4	40440	49766.7	45540.7	44882.3	45096.3	45486.6	42455.3	44633	42391.9	67592.3	99010.6	103340	78863.9	87087.6	107709	83616.6	90784.4	89549.8	84855.9	100172	109104	91360.6	80378.3	83941.1	76161.8	66969.1	71225.6	72467.3	71037.5	92656.4	67079.6
83	acceptor	33071	34935.9	36137.7	36892.1	28946.3	30255.2	35091.9	57210.6	68830.1	64378.4	36239.4	21843.6	42708.6	30926.2	30580.2	30450.2	27190.4	45329.3	24843	29298	27422.1	21049.4	26957.7	30569.6	27203.4	15865.4	2440.24	-9251.72	490.155	-3347.88	-6090.73	-1550.98	2435.22	-1842.83	-906.315	-3760.45	-7190.63	175.31	2727.64	-5697.68	-4775.94	1486.86	770.694	807.731	-3789.27	-1446.59	-932.564	3179.45
83	fret	0.407313	0.500538	0.442706	0.462535	0.389757	0.388785	0.425945	0.698341	0.803355	0.774893	0.524765	0.313799	0.466515	0.376168	0.46154	0.338606	0.456574	0.528812	0.332866	0.391703	0.379075	0.318559	0.37229	0.419068
84	donor	38968.5	52496.7	42445	46907.8	44179.7	41524.5	46915	44102.3	37477.6	30677.7	42932.3	38030.5	38377.7	46544.5	38183.7	42783.5	46420.5	44811.3	44709.2	40624.4	41126.2	31175.2	31229.2	42281.7	38067	41286.7	39038.6	46137.5	39616.3	36843	38361.6	39547.7	48670.1	42131.4	48640.9	42456.7	43222.6	45972.6	50482	47344	48572.3	40751.3	42307.9	50085.2	47822.5	50864.2	33745.8	47821
84	acceptor	49407.8	39950	55243.6	45730.3	40817.5	56538	37538.5	48423.6	51183.3	55669.7	48050.9	50986.4	51771	47738.1	53712.7	37663.8	40089.8	48416.7	40674.6	35383.7	19823.4	11379.7	25129.6	33941.3	38993.1	42248.3	53948.6	46831.8	44975.5	35174.6	49355.9	47640.5	55780.2	39910.7	58676.1	59272.3	44626.8	39159.1	50513.8	40269.6	52270.4	59442	48616.4	49608.3	41662.7	29643.1	27777.2	59443.4
84	fret	0.55902	0.431889	0.565921	0.494133	0.479965	0.576732	0.444239	0.523263	0.577713	0.644586	0.528256	0.572806	0.57477	0.506223	0.58457	0.467765	0.463688	0.519263	0.475904	0.465727	0.324766	0.267543	0.446292	0.445266	0.506223	0.506223	0.580654	0.504211	0.531248	0.48807	0.562966	0.546159	0.534236	0.486046	0.54715	0.582612	0.508233	0.459604	0.500184	0.459604	0.518262	0.593361	0.534236	0.49716	0.465727	0.368293	0.451427	0.55408
85	donor	73998.9	77591.4	84077.9	97652.8	91146.3	77881.5	51285.2	59787.2	93601.9	33050.8	50016.5	53244	61107.5	43871.7	45718.8	79930.3	74594	94253.7	52938.9	78371.6	59302.1	84913.1	106128	82495.9	86113.4	84246.3	103751	89819.3	64800	68437.6	73705.5	81624	86101.8	104578	86766.9	94498.8	71483.3	85855	70178	105951	94245.4	94587.1	100487	89327.5	99688.3	99965.1	95475.7	77309.7
85	acceptor	16180.3	21980.2	10432.9	9914.91	17332.6	20500.9	51344.4	47589.5	21720	60659.3	47880	49015.5	40039.2	50586.2	56584.2	32205.4	48402.8	31033.3	47185.6	27518.9	40877.3	35292.1	6107.64	25163	24162.3	24427.5	10029.6	5466.65	34513.6	34107.6	33865.1	23696.1	23423.6	-1131.02	13968	12419.4	34308.6	20018.3	17797.1	10382.7	11198	13055.8	12825.1	4149.65	11386.8	2685.52	15696.1	16400.2
85	fret	0.179287	0.221156	0.110501	0.0921673	0.159867	0.208481	0.500759	0.442877	0.188037	0.647809	0.488759	0.479767	0.396191	0.535834	0.552908	0.286715	0.393219	0.247529	0.470782	0.260249	0.408093	0.293587	0.0546302	0.233846	0.219205	0.225059	0.0883114	0.0575131	0.347731	0.332938	0.315213	0.225059	0.21433	-0.0105112	0.138545	0.116298	0.324072	0.18901	0.202636	0.0892753	0.106639	0.12113	0.113399	0.0440662	0.102778	0.0258433	0.14145	0.1754
86	donor	34157.2	27898.2	35938.5	90950.2	99377.6	115929	140840	92571.4	88346.2	142408	101426	98601	101404	101892	105712	104392	99831.4	118385	97273.5	99287.8	105430	103460	102517	104723	93682.9	103333	104417	102467	113315	99611.8	109264	98419	86121.9	98112	99688.3	94680.4	95319.8	100773	104327	113752	96942.2	91507.2	93642.9	110623	98732.1	89478.3	95419.4	99841.2
86	acceptor	57372.7	70918.6	63426.4	13806.2	-2796.08	-2150.96	-1380.14	-1178.69	1025.8	-5852.08	-3407.44	-4702.28	-4671.07	2663.64	2700.49	1449.9	-6340.7	-5438.38	1139.39	3422.37	1335.71	-7284.93	205.897	-5546.64	-2620.94	-5346.38	-784.235	-796.707	-3164.69	-6151.4	-5222.67	-9312.8	-4373.45	-3900.34	-1880.02	-5515.39	-265.751	856.719	-4145.14	-2972.27	-425.623	-3832.91	-3565.74	-3360.59	-4552.15	-920.866	-4503.65	1205.16
86	fret	0.627085	0.717752	0.638594
87	donor	23301.6	34566.8	33301.4	46255.4	9834.33	13978.6	19357.8	22391.2	39602.3	36802.6	66392.1	103934	99894	109234	115501	105031	93298.1	102732	107482	104232	100544	81182	72870	92739.4	103674	103834	105239	104772	107484	100693	103913	90597.2	95278.7	103068	100734	110182	105294	98349	98715.3	93972.5	94096.6	100327	102692	102437	107703	103645	112151	105694
87	acceptor	71535.5	59407.6	60004.1	48072.5	91734.6	98404.7	98327.6	78508.9	55895.7	64172.9	40260.9	654.284	1743.83	2537.43	-8755.13	-2056.14	-1719.27	-1478	-1793.91	-6093.01	-4100.74	-2901.62	-225.758	5365.69	-3554.55	1906.26	-2014.56	1356.32	-2432.25	2211.86	238.249	-2214.53	167.714	-1682.12	-1582.06	-2508.92	3336.59	-1097.91	-19.905	3138.92	2346.21	418.609	1202.62	-455.451	-3899.29	-3408.8	215.094	-3042.01
87	fret	0.754284	0.632086	0.64338	0.509616	0.902876	0.875379	0.83573	0.777834	0.585091	0.635865
88	donor	45453	48285.8	32068.4	36778.3	42799.2	46723.5	42223	48139.9	23416.4	31042.9	39905.5	55605.1	37898.9	43521.4	43202.8	39814.1	38854.6	16981.7	33426.4	26486.5	46830.1	41748.3	52378.9	37344.3	35224.8	55973.2	49482.7	54518.7	46231	48010.4	37678.1	40948.8	50062.7	49155.2	46021.6	55725.7	46048.3	39295	42706.6	24958.5	59930.5	38759.4	51689.8	34816.1	42388	42841.1	35450.7	38443.4
88	acceptor	33219.7	34395.2	41110.4	37083.2	31949.6	26779	28482	25994.9	45410	44118.1	31770.5	32606.3	35753.1	29329.9	31461.8	27591.5	45071.2	50247.6	38477.5	48830.2	32231.8	19124.5	23905.6	39855.8	39259.7	17001.3	23213.8	19065.7	33371.4	28152.4	30617.7	37400.1	35085.2	31554.6	30793.7	25613.3	35573.2	35834.7	30005.9	52716.8	33664.9	46182	29474.9	36956.8	37902.3	33783.7	38336.7	38670.3
88	fret	0.422284	0.41612	0.562233	0.502485	0.427413	0.36435	0.40273	0.35077	0.659656	0.586839	0.442761	0.36956	0.485375	0.40273	0.421257	0.408916	0.537458	0.746981	0.535469	0.648105	0.407886	0.313962	0.312905	0.516515	0.5275	0.23275	0.319239	0.258585	0.419203	0.36956	0.447855	0.477295	0.412005	0.391361	0.400665	0.315019	0.435603	0.477295	0.413034	0.678824	0.360177	0.54342	0.363307	0.514514	0.472236	0.440719	0.519514	0.50148
89	donor	198368	201750	204371	193871	196048	232913	196774	206336	209610	202554	196423	214733	224867	197533	199518	199506	200318	192007	207858	183982	222264	214050	199862	212199	197685	207920	189975	210327	212697	210832	208296	200784	185065	207757	201361	194271	221215	197233	219710	191521	189211	199218	203398	226181	217252	227089	209900	193928
89	acceptor	26930	15770.7	30665.1	24173.6	17790	21202.5	26064.7	17164.8	22225.6	24808.9	29594.4	15644.2	19799.6	16257.6	23889.4	17788.2	21672.7	22504.5	17860.3	18924.8	20239.5	22524.4	23433.7	16049.5	15344.9	32193	18620	15267.8	18050.9	18643.3	24098.3	35521.4	17406	33382.5	18784.2	29098.2	22070.1	24172.3	26481.5	32927.4	29393.9	13494.6	13604.5	18470.6	14702	23779.2	25097.6	23276.6
89	fret	0.119734	0.0725029	0.130281	0.110645	0.0829008	0.0835179	0.117124	0.0767633	0.0959897	0.109357	0.130946	0.0676697	0.0810492	0.0761529	0.106789	0.0816644	0.097882	0.10487	0.079211	0.0934754	0.0835179	0.0953601	0.10487	0.0700816	0.0718967	0.134282	0.0890994	0.0676697	0.0779859	0.0810492	0.103593	0.150534	0.0859924	0.138307	0.0853729	0.130281	0.0909711	0.109357	0.10743	0.146433	0.134282	0.0634716	0.0628742	0.0755431	0.0634716	0.0947313	0.106789	0.10743
90	donor	41547.8	41716.2	40003.5	44920	41312.3	36214.5	65366.5	107771	95326.4	92972.6	99168.1	95843.3	99237.9	90089	97238.4	88635.8	111071	100540	104745	92175.3	103240	99972.2	106983	117195	89648.3	100068	99912.6	95700.5	94922.4	92704.5	100602	96988	103900	107554	101379	101319	101656	108772	101186	97822	112148	97147.3	97561.4	105658	110176	93785.8	101623	94699.7
90	acceptor	59181.7	55078.7	46465.2	56079.7	62718.8	54891.4	32256.5	-4502.5	-5335.67	2088.49	-1424.12	-7388.57	2038.11	-5165.45	-5380.84	-6457.33	5831.53	-36.26	-9189.87	-5389.18	-4306.13	-2138.44	-6239.71	-1762.25	-5427.4	-1225.02	-4676.35	-2936.95	-2080.94	-4590.98	-7271.84	-1127.61	-7403.33	-3842.43	-6330.47	-738.204	613.724	118.505	-238.458	-1587.64	2343.68	4085.44	1322.9	2227.99	-3781.71	-3307.6	-3638.51	-1861.62
90	fret	0.587959	0.569422	0.537624	0.555601	0.602418	0.602418
91	donor	55636.6	59418.4	62842	64034.3	63211.4	64736.6	56276.4	69041.9	60548.3	42913.9	42970.2	65670.3	64809	58197.7	46066.4	56641.5	45973	47907.2	53802.1	55839.6	49169.5	42865.6	57957	66816.2	56783.2	44791.2	50026.4	56923.6	64851.1	69478.7	55632.3	55176.9	52094.9	26221.3	57829.5	69479.9	70946.4	53655.4	66645.4	54302	69424.9	65369.6	57054.2	63494.2	64255.2	67532.1	59398	66940
91	acceptor	36010.5	34570.6	21789.8	25968.6	18158.1	22484	20183.4	26468.3	28411.4	51338.9	42669.2	27961.7	25393.8	30040.1	37524.7	24993.2	28360.7	36865.2	35469	26636.8	45584	46406.6	32001.5	27377.5	26955.1	48046.7	41883.4	34111.4	29167.7	17771.8	32462.1	31013	34895.9	69066	23863.6	20179.8	24259.3	34883.1	28969	35353.6	20494.3	28706.1	25431.5	22618.1	17862.4	27085.7	23680.8	15600.7
91	fret	0.393396	0.367333	0.257919	0.288057	0.222735	0.257919	0.263948	0.277008	0.31918	0.544494	0.498513	0.299103	0.281026	0.340252	0.448485	0.306131	0.381368	0.434468	0.397404	0.323194	0.481509	0.519509	0.355299	0.29107	0.322191	0.51751	0.455492	0.374351	0.310146	0.203625	0.368335	0.360313	0.401412	0.725008	0.292074	0.224746	0.254904	0.394398	0.303119	0.394398	0.227763	0.305127	0.308138	0.262943	0.217707	0.286048	0.285044
92	donor	33416.1	33302.7	17661.1	19763.5	22614.7	21379	26367.6	28672.6	30055.8	14739.9	29187	33149.9	36107.2	38538.4	41990	44500.8	41756.7	35277.7	35560.9	37330.2	37799.1	39174.8	38077	30889.5	26811	27625.6	33613.4	25138.2	29193.4	36538.9	37383.3	27918.4	34666.7	70643.5	55184.4	55383.8	64528.4	60652.5	67742.4	60592	59304.3	58890.6	54402.7	68050	65188.2	71112.3	81331.4	52926.1
92	acceptor	22187.6	31641.6	40159.5	42970	30814	43528.2	28685.8	28496.2	35211.8	50655.9	36754.5	43574.4	26581.4	30194.4	41550	30340.9	26934.8	26889.3	27093.2	18535	22238.7	34732.1	30479	35376.5	32362.7	48042.7	42399	43565.3	40545.5	27369	33793.8	32771.7	17943.3	-1785.73	-840.83	-1361.6	-5044.46	-859.292	-306.685	-3763.47	2038.65	105.167	2404.74	2832.74	-5786.92	-4891.72	72.476	-1225.08
92	fret	0.398996	0.486883	0.694034	0.685408	0.576615	0.670374	0.521202	0.498951	0.539558	0.775074	0.556996	0.568338	0.424381	0.439135	0.496936	0.405808	0.392202	0.43224	0.43224	0.331807	0.369997	0.469878	0.445058	0.533429	0.546725	0.635248	0.558025	0.63419	0.581801	0.428308	0.474868
93	donor	91917	102514	79842	105475	130221	134724	127319	116427	93697.3	112166	113742	82759.6	103009	105136	96461.1	93306.7	106403	190206	192617	174475	166671	174396	159031	141121	-1521.9	-1324.85	-3369.62	-1558.2	-4152.62	2375.78	1877.99	-1649.8	-2932.32	3421.5	-187.526	-2531.32	-1373.25	-2173.53	-2529.59	-1765.61	-3074.06	880.664	-3725.69	133.969	794.241	1153.76	2422.45	5035.89
93	acceptor	64296.5	52324.5	88139	44719.6	21759	34669	39331	55003.3	65724.2	52398.5	58397	66356.5	58930.9	57096.6	64881.4	59600	54027	-3804.18	-4282.04	-3909.1	-4203.85	-81.536	-481.078	-3070.49	-1948.01	-554.14	1650.64	829.84	-2291.81	1550.05	-1632.65	-588.571	-2194.79	390.029	-3313.63	-1142.76	-1283.99	1250.9	1859.46	-2470.85	547.598	-688.932	-1010.8	-1385.58	-1168.93	-1545.15	-3650.21	2782.67
93	fret	0.411899	0.337657	0.524523	0.297369	0.143021	0.204479	0.23571	0.320476	0.411899	0.318682	0.33948	0.445317	0.363444	0.352323	0.402242	0.389804
94	donor	21464.1	30272.7	32829.4	31176.4	27157.6	31535.1	25921.9	16716.9	18143.3	19189	36058.9	23728.2	24128.2	27472.2	31656.2	28748	35108.8	27632.6	21543.6	31907.5	31924.4	37894.4	36566.3	32720	30456.4	29719.7	33042.1	39087.2	23660.6	27788.8	37896.7	31504.4	38578.3	25973.4	35941	33875.1	31850.1	27681	33940	26589.7	30590.1	23925.2	36674	41742.5	57487.3	54929.8	57852.6	61510.1
94	acceptor	44875.7	33178.1	30044.4	27061.2	43786.6	23042.3	29712.5	42183.8	48376.9	31666.5	28346.3	31885.7	30389.7	38141.9	39376.9	37473.2	39941.7	40649.7	31367.8	10098.2	7023.23	5422.24	5665.5	11617.1	32266.6	36541.2	32990.8	28560	26545	34388.5	36221.9	41623.5	29768.3	40674.4	27097.1	44520.7	20887.3	48804.5	23039.9	30716.4	40029.3	32110.1	36966.3	23496.7	2397.32	5478.39	2674.45	3085.68
94	fret	0.67672	0.523281	0.477327	0.464486	0.616823	0.421803	0.5345	0.716392	0.727592	0.622486	0.44059	0.573443	0.557622	0.581274	0.554631	0.565559	0.532468	0.594854	0.592923	0.240236	0.179944	0.12528	0.133613	0.261836	0.514023	0.551633	0.499478	0.421803	0.528394	0.552633	0.48898	0.569507	0.435093	0.610181	0.429573	0.567535	0.395926	0.638381	0.403858	0.535515	0.566547	0.573443	0.501566
95	donor	62069.2	45249	47142.1	41910.4	37677.9	34573.4	36729.9	37054.7	38750.3	37073.7	37947.1	33341.6	35422	46518.9	41786	45506.5	40993.1	34545.6	40950.7	43431.9	44520.4	44441.4	30466.8	31066.6	31520.1	28535.6	26286.9	32452.1	27139.9	32054.1	40456.2	34945	33230.4	37584.3	36955.2	35277.1	34349.6	37964.7	33515.7	35663.4	34690.5	24648.4	32721.2	42527.8	31746.9	39418.9	37664.8	37585.8
95	acceptor	-2909.4	2427.86	-2958.65	1912.97	6097.81	3676.47	-1449.85	1777.54	4245.15	-4182.35	2590.74	4962.15	1027.93	-9807.3	-1830.01	-4356.26	2396.8	13823.2	15674.2	7181.97	8482.73	6336.36	11861.3	9450.26	12634.1	14360.3	24133.7	25026.2	15209.1	15068.4	8200.63	9397.16	12202.2	7950.84	7747.92	13077.6	4146.95	5988.2	3597.83	2373.06	6488.82	10483.4	749.636	2255.41	16558.8	12003.2	1383.83	8009.03
95	fret	-0.0495242	0.0508496	-0.0663862	0.0436878	0.139638	0.0959005	-0.0404023	0.0451229	0.0986719	-0.127655	0.0636563	0.13018	0.0278129	-0.266289	-0.0464777	-0.10539	0.0551305	0.2856	0.277054	0.142329	0.159704	0.124748	0.280723	0.233532	0.2856	0.334632	0.478326	0.435396	0.35909	0.319272	0.168975	0.211905	0.268456	0.174246	0.17293	0.270918	0.108332	0.135592	0.0972868	0.0622416	0.157044	0.298925	0.0219991	0.0508496	0.342833	0.233532	0.0350492	0.175561
96	donor	18208.6	13349.2	27765.8	21251.6	19094.5	18700.4	32576.3	10626.2	27450.3	22516.8	21042.7	27194	18980.4	39286.1	33235.6	20088.6	20451.6	20438.2	18795.2	23307.9	21762.7	3649.73	8126.87	27745.1	20321.2	33043	15618.9	27767.3	21518.3	22582	18410.1	14088.5	23211.6	18549.3	25927.3	20919.7	24414.6	22106.4	22398.3	20673.8	16854.5	26463.6	25684.3	19093	31414.8	25626.5	18451.5	21786.4
96	acceptor	27271.1	39372.2	25199.6	33030.6	41242.5	24363.4	19441.8	25021.5	29978	31251.4	35300.2	23084.2	45648.3	23974.3	25279.6	23868.5	35386.3	31005.7	24579.8	38801.9	22740.5	54814.5	48957.5	28180.5	26027	23904.2	39899.7	33722.2	34597.2	38658.8	22761	31758.2	44202.8	37083.1	35670.5	30045.4	30571.4	38252	39112.6	35764.3	24875.5	35953.6	37522.8	24357	27255	39009.2	20609.8	28470.6
96	fret	0.599929	0.747043	0.475608	0.608653	0.68397	0.565718	0.373832	0.701754	0.522055	0.581414	0.626973	0.459258	0.706413	0.37912	0.432469	0.542986	0.633689	0.602841	0.566702	0.625051	0.511023	0.937302	0.857202	0.503979	0.561779	0.420012	0.718487	0.547945	0.616394	0.630813	0.552894	0.69241	0.655632	0.667006	0.579458	0.589227	0.55586	0.633689	0.635605	0.633689	0.596043	0.57554	0.594097	0.560794	0.464378	0.60381	0.528053	0.566702
97	donor	85008.6	74505.2	64426.3	86128.2	85146.8	74821.1	77939.2	59142	74633.5	63685.8	84744	63928.7	68506	79106.2	66401	79266.2	72141.5	60322.9	67982.7	80332.5	75148.9	68229.6	82607.3	56821.8	46523.7	68752.9	60453.2	51691.5	58693.8	48974.3	65002.9	67362.7	61979.7	71193.6	77449.4	89183.1	62530.6	80994	79682.8	67968.9	67739.9	86827.3	86770	71104.7	81025.6	52240.5	72684.5	85867.6
97	acceptor	25579.3	33615.4	22806.4	19047.8	13656.7	17228.3	21927.8	28177.4	39289.9	24958.7	42209.3	39116.5	28698.4	22597.4	33463.5	27614	16478.8	22597.2	27278.1	29971.5	33211.5	24392.6	30328.1	35787.4	39777.3	32127.3	40076.1	37873.8	47603.9	56797.2	30412.1	33360.7	45723.3	26305	21572.3	13796.5	39440.8	24060.7	36217.5	18409.8	21452.9	26091.7	22364.7	44831.6	27644.5	39976.8	52618.4	37103.4
97	fret	0.23087	0.310654	0.261317	0.180862	0.13803	0.186934	0.219351	0.322716	0.345175	0.28127	0.332043	0.379337	0.294983	0.222003	0.33485	0.258611	0.186066	0.272176	0.286747	0.271268	0.306035	0.263122	0.268549	0.386047	0.461335	0.318068	0.398566	0.422859	0.447441	0.537382	0.318997	0.331109	0.424815	0.269455	0.217585	0.133799	0.387007	0.229093	0.312505	0.213177	0.240669	0.23087	0.205267	0.387007	0.25411	0.433639	0.419929	0.301425
98	donor	7600.79	15457.8	11157.2	11705.2	13488.9	13801.5	11965.4	7715.87	8841.85	13991.1	11870.6	11286.7	12773.6	20411.5	12338.1	11660.1	24587.2	9276.68	11316.8	13247	11980.5	17914.4	12931.2	17082.7	9507.5	11791.5	13655	17703.8	13291.5	11842.5	24283.1	33155.6	31701.4	36012.4	33980.1	13702.1	15035.4	13569.4	16232.6	17303.7	14284.7	13605.3	11960.2	21168.7	15344.6	16171.1	9926.63	16001.1
98	acceptor	103057	95204.4	106338	109260	101344	102805	99508.9	118169	94584.8	111717	95085.2	85400.4	101424	92090.3	97321.6	87784.4	69436.2	96600.8	84744	83800.4	89372.5	71766.7	86053.1	70794.7	92721.1	96271.8	95502.7	75440.2	88057.3	82158.5	81475.6	73276.1	75308.7	59730.8	44591.7	78900.8	80539.9	87657.6	99016.6	90395	99829	99656.8	99764.5	90189.4	72359.8	91360.3	90769	97957.8
98	fret	0.931039	0.86037	0.905063	0.903123	0.882744	0.881408	0.89268	0.938455	0.914683	0.888765	0.888765	0.883411	0.888103	0.818514	0.887441	0.882744	0.738335	0.912131	0.882076	0.863807	0.882076	0.800058	0.86927	0.805285	0.906998	0.890704	0.874691	0.809694	0.868589	0.874015	0.770201	0.688776	0.703421	0.623767	0.567372	0.852054	0.842933	0.86586	0.858991	0.839394	0.874691	0.88007	0.89268	0.809694	0.825059	0.84996	0.901177	0.859681
99	donor	53878.7	57098.1	62153.9	52902.8	52187.9	42772.6	44311.6	29207.8	36351.5	30607.4	67631.8	40281.6	51674.8	48789.2	76223.5	28389.9	65391.4	48496.5	30925.1	6315.45	47696.3	31673.8	41608	33939.6	19512.7	3167.3	23680.4	19616.2	19488.3	30506.5	17527.1	7270.03	10873.1	20913.9	21628.8	33810.7	48050.9	34238.5	25299.5	43244.2	56133.6	64808.6	58538.3	46987.6	46464.6	68139.2	72730.2	77006
99	acceptor	43882	35994.2	27218.3	45155	45043.7	46959.8	45966.3	60036.8	45920.3	66423.6	8524.31	56948.6	41615	47762.9	11191.3	66094.2	34053	36936.4	60322.9	79065.6	42990.5	59862.7	46400	57992.9	70173.6	79706.8	62283	72784.7	66108.3	56150	72304.7	88068.1	85039.3	69186.7	82947.4	54042.2	39593.3	67577.3	49546.8	40441.6	32051.5	25821.6	31208.9	48213.8	37113.2	20628.2	6717.61	11106.3
99	fret	0.449123	0.38625	0.30489	0.460926	0.463061	0.523527	0.509184	0.672452	0.557716	0.684174	0.111866	0.586178	0.445885	0.494682	0.128164	0.699335	0.342673	0.432858	0.661556	0.926017	0.473686	0.654221	0.527596	0.630995	0.782378	0.961876	0.72477	0.787329	0.77244	0.647744	0.804495	0.923828	0.886691	0.768263	0.793079	0.614968	0.451277	0.663382	0.661556	0.483175	0.363485	0.284399	0.347325	0.50609	0.443723	0.232479	0.0843073	0.12546
100	donor	72990.3	48725.9	70898.4	72083.9	81479.3	76492.1	80154.2	72706	86054.4	86809.5	89365.7	77365.9	74661	79225.6	72844.3	80686.3	59745	64393.1	63326.3	87234.7	69459.9	62126.5	51146.5	75036.6	69735.1	67022.4	80026.4	78427.5	83232.1	80430.7	87263.3	79890.8	70693.7	87845	64899.2	12901.2	52905.9	75712.2	70649.3	70307.6	59308.1	76973.3	70774.5	65415.6	91693.7	96932.6	105839	82027
100	acceptor	20713.4	50058.9	23609.4	16622.1	15441.9	17685.7	12171.6	21449.6	14894.2	-537.215	6522.6	29382.1	31523.7	30766.4	17900.5	11017.1	44010.4	35075.5	16276.5	18730.9	18829.3	28775.2	38633.2	19063.8	16347.2	21664.7	11117.6	18028.5	3645.72	17327.2	12009.5	9376.06	24975.1	7350	26419	64200.4	29982.5	11530.2	15162.8	16167.9	28388.5	9521.37	20243.2	22907.9	2709.97	10442.6	-1605.4	5296.59
100	fret	0.220883	0.506871	0.249371	0.187694	0.159772	0.187694	0.131607	0.22748	0.14741	-0.00589452	0.0676181	0.275444	0.297008	0.279768	0.19769	0.120272	0.424413	0.352397	0.204331	0.176554	0.213169	0.316297	0.430597	0.202118	0.189917	0.243912	0.122543	0.186581	0.0421331	0.17767	0.121408	0.105478	0.261347	0.0768366	0.289477	0.833025	0.361885	0.131607	0.176554	0.186581	0.323759	0.110037	0.221983	0.259173	0.0281484	0.0974835	-0.0153476	0.0606873
101	donor	36506.6	27328.5	25061.9	32200.9	33229.2	25477.6	27483.9	23898	31461.4	23933	29971.5	28709.1	31579.5	32076.2	27731.1	25998.3	26766.2	28037.4	21863.3	29118.2	26678.7	31697.7	31507.3	32804.7	24486.5	17723.8	20607.4	21259.4	24735.9	27908.3	25552	22108.3	28470.6	36655.4	37653	31183.5	33662.4	18701.8	23957	37237.3	34104.3	36187.2	32148.4	35999	38283.1	29059.1	27472.9	34502.5
101	acceptor	28823	28844.8	22525.5	13491.4	21467.4	28412.4	26201.6	25145.7	22462.8	24713.6	27120.7	26221.5	20428.7	32944.3	27465	29418.1	22632.6	24583.3	25988	26574.9	30539.3	24670.9	28203.6	34422.2	26761.8	45120.4	27531.3	23329.4	26409.3	24907.2	27380.9	18134.8	30137.9	30242.1	32597.3	26175.1	24356.2	22674.4	24358.4	17814.3	29684.1	31925.3	24959.3	36780	25793.4	23834	23062	23962.2
101	fret	0.440871	0.51381	0.473816	0.295654	0.392036	0.526822	0.487806	0.512809	0.416939	0.507807	0.474815	0.477812	0.393031	0.506806	0.497804	0.530828	0.457837	0.466824	0.542847	0.476813	0.533832	0.437878	0.472817	0.511809	0.521817	0.717809	0.57192	0.522818	0.516812	0.471818	0.516812	0.450849	0.51381	0.451848	0.463828	0.456839	0.419929	0.547857	0.503805	0.323436	0.465825	0.468821	0.436881	0.505806	0.402989	0.450849	0.456839	0.409964
102	donor	37889.8	58592.4	62674.5	49804.1	54508.2	50949.2	32645.4	46110.8	42726.6	29253.8	29016.7	42157.9	47950.7	40083.8	48872.9	35539.6	39063.3	35434.6	33761.2	39810	50351.1	62249	57720.5	48856.4	37300.7	53327.9	44587.6	49106.3	76170.6	51834.6	53022.5	43777.9	39996.1	48280.1	82023.5	103120	65241.5	51981.7	44225.1	56449.4	64277.2	56430.6	47769.1	46155.1	39668.1	35329.5	42067.8	42471.5
102	acceptor	46138.6	34652.8	39692.4	48355.8	38317.9	37888.4	52931.9	37473.9	42584	39443.4	46742.4	43734.7	49989.1	59423	47072.3	36376.7	40143.5	41798.4	54876.7	63011.3	43997.7	22693.8	34992.8	57206	61158.5	44084.8	59902.5	48831.4	25963.2	41596.8	60586.1	46633.7	46721.2	41965.3	30102.7	36780.7	41039	41413.1	43326.3	34937	34466.5	32209.1	51739.6	44779.9	47957.1	44878.1	47779.6	48384
102	fret	0.548615	0.371554	0.388209	0.492864	0.412323	0.426414	0.618593	0.447811	0.499046	0.574267	0.616693	0.509295	0.510316	0.59756	0.490814	0.506228	0.507251	0.541633	0.619542	0.612886	0.466831	0.266624	0.377126	0.539632	0.621438	0.452058	0.573289	0.499046	0.254669	0.445683	0.533613	0.515411	0.53863	0.464729	0.269005	0.263056	0.385999	0.443552	0.494927	0.382677	0.349073	0.363722	0.519475	0.492864	0.547619	0.559522	0.531601	0.532607
103	donor	35509.1	27179.7	30273.3	28763.4	31571.6	30672	32365	34225.9	34272.5	35444.3	36456.3	33583.4	36933.9	33685.6	37765.7	35268.2	32240.5	20931	36554.4	41332.8	32548.1	32952.9	49378.8	32473.2	33108.7	32699.9	22102.8	36151.7	31288.3	40656.9	29734.9	25044.5	28568.1	28995.2	11742.5	27236.4	16463.2	30901.7	24217.8	43742.3	72079.9	76142.8	72769	77409.8	83449.1	70443.5	69555	87321.8
103	acceptor	44539.6	49198.3	51288	44608.9	43474.5	41314	47476.8	48110.6	49785.3	37474.1	42752.6	46124.9	51070.9	55025.7	43080.6	39079.5	42301.1	52105.6	46485.2	46876.4	40899.6	42711.4	32023.9	47382.2	41244.8	29923.2	40176.9	32723.1	47410.3	63910.1	48734.2	48455.7	48001.1	46277.1	64927.6	56435	55589.8	49089	41552.2	25910.5	-6115.11	70.585	-3721.7	-1983.69	-1109.66	723.169	-2954.92	-3690.38
103	fret	0.556347	0.644015	0.62892	0.607945	0.578926	0.574042	0.594463	0.584769	0.592528	0.514351	0.539469	0.578926	0.579901	0.62037	0.532472	0.525447	0.567182	0.713042	0.559308	0.53147	0.557334	0.564234	0.392961	0.593496	0.554369	0.47756	0.644954	0.475479	0.60218	0.61082	0.621322	0.658978	0.627023	0.614646	0.847225	0.674734	0.771522	0.61369	0.631777
104	donor	157205	122638	96842.5	89464.6	106750	90612.8	104037	123667	81354.1	84556.1	124383	110314	153448	93083.8	88303.2	90453	137227	207646	215152	304511	204920	243498	231674	229384	202146	146679	205358	173275	173157	237610	200968	339951	53859.6	6228.45	12070.1	19815.8	5064.2	16889.9	10503.2	12625.3	14068.6	10817.2	-1531.78	4593.26	18199.5	3459.54	11478.5	8179.05
104	acceptor	80703.4	84411.5	65456.7	117631	118372	110504	114191	127139	98387.2	73763.3	79920.3	73521.8	110295	98919.7	110613	106426	101297	66476.5	72644.8	54427.4	71619.2	72761.4	75008.1	81414.2	77102.2	1769.99	3114.56	2435.42	-1868.93	-5483.75	4137.19	1247.71	-1438.27	-1337.89	6538.26	-1525.17	1006.62	1498.44	3984.75	-2622.22	-462.84	3378.07	1950.63	-3499.4	-2145.02	-4123.3	4684.1	1343.52
104	fret	0.338988	0.407454	0.403563	0.567906	0.525888	0.548934	0.523615	0.506759	0.547765	0.465552	0.390968	0.399665	0.418357	0.515706	0.556023	0.540783	0.424354	0.242621	0.252084	0.1519	0.259266	0.230203	0.244189	0.261677	0.276319
105	donor	32709.3	29123.7	30973.3	25720.9	43413.4	24608.6	22652.4	22708.8	70293	80239	88520.8	90870.2	78643.2	73539	54528.9	53983.1	61402.1	78945.6	88234.1	85210.7	84605.1	87016	92382.8	87566.1	75768	87115.7	80351.6	84437.9	79180.3	82675.9	78941.2	71419.1	60288.9	53788.2	53156.6	69437.9	78168.5	59767.4	92448.6	90894.5	79752.1	77483.3	81532.3	89195.6	97929.7	91716.6	78316.6	86485.9
105	acceptor	60818.2	66595.6	67769.4	57784.1	68331.5	58504.7	59328.6	52410.9	30644	6270.31	5052.71	-756.794	5300.89	2046.37	1825.81	5834.32	2345.26	6139.33	4563.87	-353.556	4528.62	4620.25	4792.98	4310	8428.22	4600.98	3733.58	2466.51	3840.87	1636.75	6554.25	7104.79	6029.31	6383.61	7851.35	6006.3	9420.9	7172.32	3324.32	6297.67	6218.31	8015.92	1281.49	8671.58	8932.7	5034.4	4857.13	6775.92
105	fret	0.649875	0.695917	0.6859	0.692282	0.611122	0.704067	0.723816	0.697732
106	donor	43767.7	39016.2	45883.8	36361.4	38700.4	37462	49116	35625.5	33723.4	44336.1	31644.6	49398.2	44262.6	44870.9	51247.5	37240.3	31852.1	35371.6	33084.1	39945.4	39991.7	44022.9	36342.1	36937.5	39060	38437.5	38853.8	40741.8	52053	31334.1	47909.7	45923.8	38819	36362.7	35277.6	37693.9	31131.7	40043.3	40329.4	40458.3	41427.4	29889.4	38486.5	37748.1	41629.7	31642.1	36178.4	52266.9
106	acceptor	23535.8	28889	21768.6	32080.8	33814.7	30255.1	14164.5	45234.8	55003.9	51291.8	49174.1	46311.6	41674.4	37798.3	27731	44843.1	42777	43547.5	52718.2	40015.9	48443.6	44299	58638.2	45042.1	42211	45674.7	37446.8	39986	41240.6	41100.1	27708	20964	45543.9	53975.4	48163.2	47276.1	57172.9	41256.9	41624.6	38645.1	28367.3	44559.2	31564.1	40234.3	28263.4	46891.1	43483.1	24266.2
106	fret	0.349621	0.425139	0.322216	0.468781	0.466636	0.447173	0.22346	0.559611	0.619658	0.536529	0.608276	0.483697	0.484756	0.456933	0.350799	0.54662	0.573443	0.551633	0.613981	0.500523	0.547624	0.501566	0.617769	0.54963	0.519175	0.542594	0.491087	0.49529	0.441686	0.567535	0.36602	0.313759	0.539565	0.597743	0.577365	0.556626	0.647628	0.507811	0.507811	0.48898	0.406115	0.598705	0.450421	0.516086	0.403858	0.596781	0.545614	0.317391
107	donor	24071.1	21358.5	6766.13	27784.5	23679	25462.9	24979.3	21660.3	19775.4	20690.2	18986.7	19694	20024.2	24581.5	16687.9	14285.4	18716.1	22668.2	20468.8	22743	22764.8	23014.7	20119.6	24269.2	20853.1	27485.5	22517.1	22344.7	18265.4	21308.9	17307.1	21953.1	15586.3	25350.8	23489.9	23178.6	21151.6	18631.9	23149.1	19919.9	16445.3	23529.5	16914.4	25208.5	21844.9	13429.8	18594	30492.1
107	acceptor	27458.7	32425.3	79035.3	47897	32780	35362	45216.3	50280.7	46572.1	49770.5	63691.1	51545.9	67596.6	54143.4	46742.6	58553.9	42333.7	51343.8	49644.9	44068.4	49941.2	33859.8	44980.3	46065.4	49719	35015.8	46198.1	34888.4	36864.6	42927.3	42276.2	34939.6	46073.5	25014.4	34118.4	34295.9	46781.8	35398.3	29529.2	28287.4	41048.1	21052.9	46188.6	34621.3	54691	23499.2	28631	676.54
107	fret	0.533333	0.603343	0.921264	0.632806	0.58071	0.581708	0.643903	0.698673	0.702066	0.706284	0.770485	0.723727	0.77125	0.687532	0.736728	0.804073	0.693553	0.693553	0.707965	0.659341	0.686668	0.595547	0.690979	0.654834	0.7046	0.560467	0.672694	0.609137	0.66827	0.66827	0.709641	0.613932	0.747112	0.496379	0.592603	0.596526	0.688395	0.654834	0.560467	0.586679	0.713856	0.472674	0.731882	0.578709	0.714688	0.636524
108	donor	33277.6	45701.7	44566.4	50478.8	36207.5	25633.6	38397.5	38513.3	32833.7	15094.9	23264.8	33909	37761.8	37350.1	37253.4	39587.1	39297	35612.7	31146.1	34218.1	33670.2	32656.5	34591.7	37218.3	24351.8	32568.6	32917.2	35350.5	31185.7	33123.8	32511.5	30024	35338.8	30506	30873.7	29316.4	28667.5	37574.3	35964.3	19041.4	22923.5	31676.4	29958.1	27911.6	37455.6	33479.8	28166.5	32887.9
108	acceptor	33607.3	29323.9	18823.6	22426.1	30784.7	36110.3	24287.2	26991.1	23972.2	44397.9	34489.2	23101	16147.2	28935.3	28565.4	20566.3	34267.4	25905.3	34234.9	34769.9	30167.9	37224.2	30665.5	31619.5	42214.9	33220.2	30247	33466.5	30276.4	29746	28388.8	27676.3	25756	34999.1	31939.9	31073.6	27403.4	27894.8	22587.1	37777.4	41981.4	32936.4	22244.2	26343.2	26459.1	28428.8	37095.1	24769.6
108	fret	0.502574	0.390529	0.296661	0.307486	0.459933	0.584935	0.38738	0.412464	0.421816	0.746135	0.597611	0.405169	0.299913	0.4363	0.434236	0.341848	0.466065	0.420778	0.523649	0.503581	0.472184	0.532631	0.470146	0.45891	0.634326	0.504588	0.479305	0.486408	0.492481	0.473202	0.466065	0.479305	0.421816	0.534623	0.508612	0.514636	0.488434	0.425962	0.385272	0.664859	0.646772	0.509617	0.425962	0.485394	0.413505	0.45891	0.568268	0.430102
109	donor	37803.6	37578.3	29230.2	31971.5	24314.7	20724.2	36425.7	19828.1	22941.6	46044.5	38449.2	34814.1	20727.8	34421.4	42884	43930.7	17819	18795.9	18045.5	13693.7	6852.36	3670.15	17151.8	40876.2	21393.9	24750.8	26745.4	30545.4	34211.8	21283.1	33656.6	42576.9	42440.8	48535.4	41236.3	37229	56410.2	5363.63	8065.26	10821.1	12373.6	18483.9	26700.8	32369	35717.4	33737.3	15525.7	31232
109	acceptor	17230.8	8974.66	22154.9	5748.97	22024.2	14597.6	9654.19	45515.1	47678.6	23653.4	31557.6	38737.3	43314.6	45468.8	36620	17716.3	60509.5	51852.1	46930.6	74222.2	64154.6	67853.4	66009.4	38281.1	39974.2	55693.2	50935.1	62417.1	62434.7	50315.9	43836.3	25863.7	30003.2	25139	22106.4	39192.6	33923.4	61144.2	56558.2	59658.7	67734.3	49934.3	34464	43775	33555.2	38816.7	62019.6	26823.1
109	fret	0.312956	0.192816	0.430857	0.152747	0.475504	0.413481	0.21003	0.696671	0.675558	0.339091	0.451209	0.526671	0.67652	0.569332	0.460336	0.287717	0.772545	0.733835	0.722444	0.844264	0.903832	0.949059	0.7941	0.483571	0.651433	0.691882	0.655303	0.671707	0.645622	0.70241	0.565382	0.377481	0.414505	0.341175	0.349501	0.512687	0.375419	0.919266	0.875532	0.84611	0.845187	0.730039	0.563405	0.57525	0.484579	0.53464	0.799705	0.462362
110	donor	15779.1	8559.88	6899.99	10726.7	17722.4	10796.7	8096.52	18386.6	16604.9	14352.7	14955	15980.8	17106.4	33716.2	20071.9	19639.4	9155.87	10812.1	30392.8	33027.6	27734.5	43722.8	32212.6	39898.8	34050.6	14308.2	24521	51150.1	97446.2	84085.3	93538.6	92249.4	115867	130639	126830	128226	121737	120619	124279	128449	127145	127097	126012	128989	127688	124826	88201.9	-364.643
110	acceptor	119227	121748	123779	132156	119864	127544	122221	103775	102761	117199	94843.4	106095	109292	91326.8	110418	96588.8	111333	106591	93531.8	99000.6	83211.7	66527.7	83990.4	84658.9	75193.5	104575	99016.5	52334.4	2405.57	-2076.14	1136.02	-8821.46	1440.92	-531.333	316.031	-994.99	1571.82	-1674.31	2539.36	4728.54	387.355	3207.94	-3628.83	-778.515	1555.03	3323.23	-2973.48	2850
110	fret	0.883131	0.934101	0.946983	0.924953	0.871216	0.921659	0.937989	0.849816	0.860587	0.890684	0.864146	0.869101	0.864855	0.730277	0.846194	0.830801	0.924295	0.907671	0.754928	0.750054	0.750054	0.60327	0.722743	0.679667	0.688485	0.879656	0.801426
111	donor	25937.5	29812.8	24801.5	31105.1	29142.3	33595.6	30607.7	29693.5	32758.7	29394.3	31332	32587.3	30296.8	29970.8	29070	31607.6	27409.6	34360.3	29021.3	27801.2	33649.4	33977.1	31975.6	30199.3	29932.1	65352.4	86844.6	86024.5	86832.9	92341.6	89163.7	91909.7	89667.9	93681	93494.4	82740.8	78494.1	92129.9	78383.2	97605	78442	84582.6	83920.5	85969.1	77270.7	89634.3	87355.5	85196
111	acceptor	65284.7	56005.7	67676.8	53957.1	47977.5	61122.4	58544.8	70174	59397.3	66953.7	64342.2	67035.2	56718.1	62565.6	66368.5	57087.2	52326	66112.8	61285.3	51989.9	58663.1	59596.1	59123	68137.5	61952.2	26140.8	1585.13	13319.8	2454.6	2166.91	8574.44	11527.5	3083.08	8013.68	5267.6	7159.61	3879.83	4713.05	4450.25	1087.16	4592.01	4254.17	-1191	4019.09	8823.93	2788.06	977.243	14151.3
111	fret	0.715769	0.652955	0.731407	0.634227	0.622379	0.645074	0.656893	0.703047	0.644088	0.695204	0.672629	0.672629	0.65197	0.676559	0.695204	0.644088	0.655909	0.657877	0.678523	0.65197	0.635213	0.637186	0.649015	0.693243	0.674594
112	donor	171486	169896	154013	167991	170160	165626	150507	158636	255615	279472	280163	290722	281048	282830	284074	287975	302608	289189	293784	291932	295742	289335	290023	280851	277187	274057	93189	1956.51	1829.79	-1942	-2427.72	1910.04	-1874.42	-4763.44	-3280.92	-892.399	6195.01	-3982.06	-997.991	-1378.13	-4357.97	-3114.08	8009.11	4807.52	5267.91	15884.2	13162.1	5417.85
112	acceptor	99062.2	101378	108100	100383	119855	112394	112325	112440	59062.5	34623.3	28452.4	20897.5	31972.2	21087.1	23150	32897.6	25783.1	22917.6	26734.1	30604.7	21959.9	23240	23228.6	3998.14	-3234.07	-2085.71	-4459.43	-3445.23	3060.98	3103.89	3238.46	502.102	-1790.07	932.357	-6139.42	-1454.57	-530.682	1930.45	-2035.86	548.455	-8622.54	820.308	-537.787	172.874	2881.37	4359.34	5623.01	-2122.39
112	fret	0.366346	0.373815	0.41224	0.373815	0.413224	0.404407	0.427132	0.415172	0.187497	0.11013	0.0921023	0.0671822	0.102338	0.0696314	0.0751765	0.102338	0.0782778	0.0733228	0.083267	0.0946477	0.0690182	0.074558
113	donor	61114.5	60953.1	73073.7	63397.2	73173	87577.4	71217	69113.7	63527.6	59401.1	71406.5	58223.2	59582.6	58344.5	62938.1	61721	73111.8	59042.2	68530.2	63702	72173.4	47349.7	71632.1	68980.4	54046.6	46243.9	72284.7	77618.2	79722.5	71398.5	66516.1	65175.7	62007.7	67973.8	70674.6	68492.1	78857.3	63288	72707.8	70262.6	58053.7	60195.2	123193	125408	138060	125385	120452	125964
113	acceptor	61456.7	61928.6	47968.4	58398.5	48585.6	37531.2	50486.6	60259.1	54487.3	58218.1	50713.3	62148.2	54228.1	59471.9	56321.4	54297.6	48425.2	56783.6	43293.7	56301.2	52068	63142.8	62281.8	60442.2	56530.7	69438.9	51786.5	48763.3	50178.1	57299.8	64757.5	55779.6	61039.4	48443.6	67390.9	48236.1	55432.3	52614.6	53835.2	61072.7	62385.5	58833.5	-725.534	-7813.87	-1342.69	-2208.98	-1334.07	-3439.11
113	fret	0.501353	0.504367	0.39619	0.479165	0.3993	0.300491	0.414806	0.465985	0.461919	0.495316	0.414806	0.516397	0.476128	0.504367	0.472074	0.468016	0.398263	0.490277	0.386844	0.469031	0.418929	0.570985	0.464969	0.467	0.51139	0.600395	0.417898	0.385804	0.385804	0.445613	0.493301	0.460902	0.496323	0.415837	0.48826	0.412742	0.412742	0.453772	0.425104	0.464969	0.518398
114	donor	28295.9	51770.3	51235.3	42964.7	40632.4	34270	41489.7	41455.7	31343.8	47423.9	42124.4	47923.9	41893.9	48920.9	37269.1	21738.9	47324.1	47685.4	42885.9	43530.6	42160.3	52650.5	48463.8	35625.3	48620.5	26963.5	46051.6	46741.2	44561.6	41045.6	34215.1	34126.3	41982.7	35649.3	52407	48687.4	50974.8	41205.2	46857	40779.1	31007.5	47094.5	40439.8	40747.2	35292	32658.2	42315	60290.3
114	acceptor	61960.6	45185.7	48170.2	49121.5	56551	54899.8	55881.1	56809.3	66520.2	64215.2	58418.6	58748.7	50975.5	52879.4	52894.4	73227.4	58027.8	55044.9	56140.6	58167.1	51041.9	47832.8	50248.9	52181.1	55889.7	72341.6	45854.1	44487.7	65500.1	56259.4	68656.3	62658.3	45184.9	57067.6	46295.5	50680.2	52219.8	52201.1	51656.8	51591.3	65789.8	59316.1	60664	56945.2	64944.9	70701	45304.6	44614.7
114	fret	0.686863	0.466258	0.484225	0.533676	0.58229	0.615916	0.573498	0.57839	0.679678	0.575457	0.581316	0.550751	0.548754	0.519445	0.586178	0.770771	0.550751	0.535697	0.566617	0.571536	0.547754	0.4758	0.509184	0.59392	0.534687	0.728237	0.498842	0.487371	0.594884	0.57839	0.667003	0.647744	0.518422	0.615916	0.469446	0.510213	0.50609	0.558708	0.524545	0.558708	0.679678	0.557716	0.599695	0.583263	0.647744	0.684174	0.517399	0.4252
115	donor	36177.6	33240.8	43460	45481.5	50150.2	21028.8	393.734	1133.12	1338.96	2661.35	-1470.26	1923.11	4417.25	101.658	2703.89	2516.46	1291.81	1168.77	3196.05	3976.84	3145.46	3457.08	-320.357	4295.36	1480.39	22486.9	62482.9	43831.4	51290.9	66354.6	55543.2	28287	38927.1	17825.2	32975.2	56635.6	69120.1	54753.2	53845.9	48651.8	49383.2	55676.6	61928.6	54314	52293.6	58735.3	44381.1	27392.4
115	acceptor	34189.8	23806.6	24229.9	22711	17902.6	43973.1	67911.3	71988.1	67159.9	75984.6	78634.9	77564.2	67905	77753.3	68460.4	82466.8	77237.8	81979.3	65405.2	76739.9	76856.3	80525.8	78461.7	73626.3	69893.3	53092.6	18328	27165.4	19694.9	16893.1	26726.1	47825.6	17452.2	60439.1	33742.3	15080.3	20680.7	28341.2	14622.9	11848.7	23088.7	8439.64	8794.73	7280.03	13040.8	8394.42	34078.5	55620.7
115	fret	0.485967	0.417006	0.358437	0.333455	0.263326	0.67659	0.994251	0.984853	0.980492	0.965847	1.01921	0.976116	0.939058	0.998565	0.962159	0.970258	0.983401	0.986303	0.953266	0.951033	0.960681	0.959201	1.00429	0.945059	0.979035	0.702788	0.227091	0.383006	0.277589	0.202477	0.325427	0.62838	0.309251	0.772628	0.505552	0.209897	0.230742	0.341442	0.213594	0.196268	0.318515	0.131591	0.123816	0.118614	0.199996	0.125115	0.434269	0.670194
116	donor	34239.1	20033.8	12839.3	19909.8	11231.1	23299	28516.9	24095.4	19375.7	39432	7874.11	23148.8	27850.6	23462.3	15985.3	18172.9	6763.05	20589.3	20782.4	30319.4	44486.7	15642	24481.6	33109	23914.2	14317.5	22874.6	20164.9	43168.2	9674.22	29076.1	24181.2	12248	38900.4	36129.9	34146.2	32360.4	15247.4	5983.4	12137.2	17132.2	24706.9	27795.7	17165.5	17625.7	21179.4	28885.3	13977.8
116	acceptor	25585.1	22917.9	36535.5	32103.4	27753.8	27825.7	19359.2	22362.7	25802.8	1580.73	50155.7	29472.8	21853.3	11513.9	22027.6	25430	42614.4	32511.5	27734.9	22712.7	13966.3	28302.1	22016.3	22274.3	14921.3	24558.4	25654.3	24659.9	15875.5	32976.8	20399.8	23084.3	48276.6	12701.6	8195.31	14304.4	26956.1	34075.5	33824.3	36524.3	39883.5	26500.1	28589.4	31373	47569.3	41096.5	22297.3	15726.4
116	fret	0.427362	0.533757	0.740134	0.617002	0.711981	0.544712	0.404074	0.481753	0.571532	0.0384066	0.864088	0.559624	0.439483	0.329679	0.579463	0.583424	0.863135	0.612073	0.571532	0.428372	0.239009	0.643561	0.47372	0.402046	0.383765	0.631769	0.528773	0.549686	0.269009	0.773009	0.412182	0.488775	0.798049	0.246261	0.184916	0.294776	0.454607	0.690543	0.849783	0.750786	0.699319	0.517795	0.5068	0.646506	0.729466	0.660235	0.435445	0.52977
117	donor	94800.3	109036	87275.2	86867.7	102131	125156	123278	82805.7	107291	99012	112764	98179.9	112425	116055	93791.5	116085	62044.2	92814.7	87866.7	123347	117385	104323	96430	95465.4	103116	74470.7	94545	63070.1	113338	137612	180100	83367.8	81809.3	68401	89712.4	93602.5	97350.4	32041.9	62105.5	74669.5	80383.3	77874.9	53473.5	85159.5	76171.6	97301.3	89783.5	73697.6
117	acceptor	123173	119512	127220	116733	104241	86904.1	117494	136550	104735	112613	106673	133028	110780	103882	114405	118932	162609	121527	126548	91551.1	97791.1	113925	99184	172386	121571	139558	115358	136887	53051.4	31926.9	48857.4	52876.5	41628.3	64340.6	43071.2	36289.5	50949.1	94245.4	63107.5	84741	47787.3	45260.9	62282	54230.3	66578.5	55269.5	59060.3	49442.8
117	fret	0.565625	0.522598	0.592973	0.573531	0.505432	0.409885	0.487492	0.622197	0.493789	0.532376	0.486446	0.575801	0.495896	0.471912	0.549982	0.506497	0.723713	0.566751	0.590667	0.425537	0.45453	0.521517	0.507563	0.64372	0.541143	0.652203	0.549982	0.684272	0.319006	0.188463	0.213464	0.387799	0.336886	0.484357	0.324335	0.279096	0.343222	0.74592	0.504368	0.531285	0.372717	0.367119	0.537847	0.38875	0.466769	0.362479	0.396384	0.401185
118	donor	24383	26809.1	14801.9	16081.1	9046.6	20415.3	30798	27892	33957.1	42117.1	27419.1	23962.1	27892	28599	36941.1	17984.6	24297.9	25957.8	29239.8	23200.8	21138.9	33775	21692.2	26416.5	31140.9	24494.2	26664.8	23160.6	34588.4	23829.7	23988.2	24889.1	31360.8	21160.2	29625.2	33098.8	25189.3	29374.6	30578.1	20862.2	27300.9	30677.5	26738.1	29741.1	29559	40816.6	24962.4	25430.5
118	acceptor	60543.1	43528.1	62754.7	60105.9	74502.4	54773.3	37500.6	42999.9	42444.7	39039.4	42923.9	54511.8	52944.9	45642.8	39090.2	53910.3	42858	52181.9	43099.3	49979.9	52867.4	41124.3	50310	49591.7	62115.4	49855.5	58654.9	50717	43867.3	48604.1	48248.2	52867.4	45852.1	53144	53147.6	48695.8	47244.8	51795.1	50543	54772.7	33613.8	42831.3	42234	44557.6	36411.5	41553.3	47345.8	44393
118	fret	0.712834	0.618384	0.809542	0.788615	0.891554	0.728258	0.549259	0.606593	0.555216	0.481313	0.610526	0.69445	0.654592	0.614456	0.514385	0.749408	0.637984	0.668233	0.595762	0.682813	0.714765	0.549259	0.698324	0.652641	0.666286	0.670179	0.687665	0.686695	0.559184	0.671152	0.668233	0.6799	0.593796	0.714765	0.641896	0.595762	0.652641	0.637984	0.623291	0.724405	0.552238	0.582937	0.612492	0.599703	0.552238	0.504383	0.654592	0.636027
119	donor	45603.5	39937.6	29302.4	49203.4	37175.2	37095.9	37733.6	37733.6	37113.5	46464.5	26760.4	27365.8	49288.6	46637.9	39664.3	36963.7	43467	30904	49091.8	33560.6	44595.5	50320.1	38068.6	38588.8	48371.8	51489.8	44107.7	44281.1	30695.4	38130.3	23524.9	33810.4	30527.9	51378.1	48027.9	45597.6	38729.8	41445.2	39746.6	33731.1	37768.9	44862.9	38647.5	27104.3	33457.8	35335.6	39399.9	40152.2
119	acceptor	27715.5	57157	34403.9	35806.3	53297.2	45049.8	37063.3	46056.7	41693	33703.3	31574.2	46807.6	38866.2	47124.6	33754.6	34362	23773.6	19367.8	31470.3	34009.2	27745.1	33190.7	40243.1	40644.6	40174.9	36162.5	31156.9	36939.1	60966.9	38195.4	46816.9	41178.9	38799	33326.9	35686.6	30817.9	33309.1	31629.3	40585.3	42710.1	28225.9	35437.5	39977.9	37494.6	36560.6	30513	37972.3	38689.4
119	fret	0.378209	0.588762	0.54008	0.420724	0.588762	0.548046	0.495134	0.550037	0.529114	0.420724	0.541076	0.631263	0.440895	0.50214	0.460017	0.482106	0.353824	0.385309	0.390376	0.503141	0.383281	0.397466	0.514139	0.51314	0.453983	0.41264	0.41365	0.454989	0.664723	0.500139	0.665705	0.549042	0.559983	0.393415	0.426779	0.403539	0.462027	0.432831	0.505141	0.558989	0.427788	0.440895	0.508142	0.580836	0.522129	0.463032	0.491127	0.491127
120	donor	42144.4	13070.6	20147.4	33599.2	29406.4	16827.9	9095.58	9405.26	36383.9	22532.9	25211.1	26544.2	20604.6	22172.4	22549.8	39166.2	34022.6	26016.8	25588.6	20686.9	33004	10370.6	19305.4	33088.7	30415.2	33908.8	23996.6	21753.8	32488.7	18207	22557.1	22399.8	26096.6	30589.4	31496.7	32759.6	27137	26890.2	27654.7	25903.1	20691.7	21262.7	34595.9	30011.2	19184.4	30824.1	38672.6	15398.1
120	acceptor	22506.8	57013.3	48906.9	44891.6	41139.1	65883.2	67151.1	60474.6	30899	43144.5	37181.5	39966.1	56907.6	60728.4	33692.4	14966.2	29133.7	42028.7	16931.1	27167.8	17622.8	58658.7	56010.7	40412.8	26874	40065.4	36690.6	43339	50682.4	52384.1	31434.1	30636.6	31218.2	35015.3	38401	26946.1	42176.7	20101	37260.2	33384.5	30059.5	45494.7	36175.4	37122.8	47653.2	45038.7	38113	57867.4
120	fret	0.348644	0.813159	0.708415	0.572249	0.582994	0.796685	0.880944	0.865072	0.459395	0.656597	0.595618	0.600451	0.733804	0.732903	0.599486	0.27629	0.461467	0.617754	0.398369	0.567346	0.347549	0.849925	0.743703	0.549591	0.468715	0.541648	0.60431	0.665954	0.609122	0.74191	0.58202	0.578118	0.54463	0.533674	0.549591	0.451086	0.60816	0.428058	0.574207	0.563414	0.592712	0.681756	0.511577	0.552561	0.712974	0.593681	0.49637	0.789705
121	donor	40166.3	27966.6	49111.3	44002.4	32073.5	44701.7	49044.4	50223.3	42127.3	38057	38617.8	31479.3	39903.4	39694.7	28571.9	32704.3	45692.6	37083.7	47844.8	47344.6	39503.5	54363.6	58827.4	53987.7	47779.5	50819.1	48851.6	50914.7	44333.7	55996.5	53973.3	37438.9	44477.1	54695	47907	51225.3	45799.3	37113.9	14256.7	14769.6	11597.8	13923.7	9053.7	14269.4	12072.6	23219.2	44693.7	40964.4
121	acceptor	28044.3	44149.2	33074.4	28574.1	38097.1	25532.3	17602.9	30018.7	37757.4	26666.1	27618	24335.5	23392	25314.4	30917.2	37952.2	22814.3	28705.8	36313.5	32303.4	25129.8	33379	19681.5	38396.1	16556.3	21628.1	20766.4	29361.4	27339.5	28619.3	26679.3	22051.6	42503.4	24806.9	34548	22183.5	17997.2	46168.7	61721.5	48785.6	61002.8	58800.8	59789.2	67651.5	59928.2	41353.2	28302.2	26515.6
121	fret	0.411226	0.612002	0.402427	0.39365	0.543051	0.363599	0.263826	0.374231	0.472493	0.412206	0.417106	0.435794	0.369394	0.389757	0.519703	0.536944	0.332866	0.436781	0.431851	0.405357	0.388785	0.380045	0.250752	0.415145	0.257282	0.298635	0.298635	0.36553	0.381015	0.338606	0.330955	0.370361	0.48849	0.311899	0.419068	0.30242	0.281654	0.554275	0.812159	0.76727	0.839817	0.808855	0.868814	0.825408	0.832051	0.64019	0.387812	0.392677
122	donor	17364.3	11351.1	24093.1	29207.1	20825.6	33746.7	14633.2	-1555.54	7013.04	32369.4	16954.5	41757.7	37439.8	50926.4	40954.8	37038.9	32049.1	28119.8	27185.9	33900.1	31837.5	11782.2	25083	31642.7	29441.2	33574.3	25577.9	34835.2	41304.1	39162	27116.5	23114.4	39429.6	34060.3	30534.1	36206.9	33752.3	30137.7	25701.1	33812.8	14753	33494.8	29482.6	19264.6	-3931.71	-1906.03	2718.67	30692
122	acceptor	20545.4	22781.2	25594.9	36201.8	33293.2	36153.9	75650.1	66024.8	49344.8	41765.8	57193	42435.8	30461.8	27127.3	33322.5	41292.9	35433.4	34963.7	39650.1	31689.9	42785.2	55483.1	42397.3	30125.9	32200.6	28632.1	47128.7	24835.9	26358.2	34580.9	39343.7	46539.3	35138.3	34515.3	27930	39034.9	38849.6	33237.7	41916.3	36811.6	42302.9	44701.7	42387.1	71086.4	76966.3	67059.5	67579.5	34434.5
122	fret	0.541793	0.667802	0.515254	0.553097	0.615626	0.517285	0.837498	1.02434	0.875511	0.563417	0.770808	0.504121	0.449109	0.347242	0.449109	0.527475	0.525425	0.554127	0.593573	0.482978	0.573777	0.824942	0.62831	0.487997	0.52237	0.460018	0.648504	0.416655	0.389436	0.468978	0.591482	0.667802	0.470974	0.50311	0.47797	0.518301	0.534624	0.524406	0.619847	0.521352	0.741925	0.571701	0.589393	0.786471	1.05383	1.02924	0.961477	0.528495
123	donor	19846.3	22581	26768.2	31807.9	19929.4	45129.9	17731.3	20298.1	18441.5	28456	25447.3	12499	8439.32	7182.67	64302.3	55109.1	62826.7	46425.3	65964.7	48242.3	50815.7	47037.5	45954.5	61012.1	62689.3	50796.8	49485	56771.4	53116.7	58431.3	63011.9	72161.5	69687.7	45307.7	55366.7	70797.9	59401.6	73849.4	63716.4	71824.9	67922.5	63242.3	61708.3	60234.4	63040.7	65382.8	64945	53039.3
123	acceptor	34448.2	29214	20481.5	30499.4	35737.6	33538.9	41748.9	26441.2	33644.8	44785.4	27572.7	45026.3	40575.8	35325	-5543.91	-2592.62	-3898.71	-3097.34	-7157.07	-8122.81	970.412	-932.859	-205.356	-1377.18	-4470.01	2753.4	-8207.86	-1554.36	-1414.01	-4765.32	-4175.08	-11608.1	-5333.94	-1581.75	-4148.57	-7277.49	-468.759	-7055.18	-2852.15	-3786.25	-5816.19	-2766.21	-8339.29	-8871.94	-6914.09	-5372.81	-2161.78	-1604.42
123	fret	0.634051	0.564454	0.433541	0.48994	0.642363	0.426538	0.701788	0.56546	0.646031	0.611475	0.520071	0.782939	0.827845
124	donor	162318	179772	172757	201390	174663	128347	180149	170006	190521	207864	150576	165638	137960	218656	205477	222713	228780	216231	213538	215140	217678	224288	218746	222438	205234	205736	200465	205299	211197	220087	209657	209701	206611	213672	210449	215940	219441	202246	207575	203246	210366	204439	204372	207286	217195	207508	210865	202267
124	acceptor	33755.6	21214.8	28667.9	20275.6	43628.2	64630.2	37774.8	50148.4	30166.7	25058.8	36942.6	46808.1	59884.1	-2581.5	1661.83	-4595.69	-2817.3	-2082.17	-323.299	1998.33	2191.53	-4919.62	-3062.21	520.463	-7186.1	-5054.79	-3153.35	-3104.96	-4825.67	461.738	-2689.11	-2890.05	1937.35	-4147.45	-2093.49	3222.26	-1291.77	-3118.15	-5669.35	1715.28	-1120	-7033.42	-1553.85	495.626	50.501	-6831.65	-5313.51	-2210.45
124	fret	0.17176	0.105177	0.14201	0.0913506	0.199705	0.335034	0.173387	0.227404	0.136458	0.1075	0.197215	0.220629	0.302385
125	donor	43882.4	41571	35154.5	46702.7	35961.1	33111.9	34367.8	48018.1	38297.8	25529.8	42438.9	42263.9	38386.2	36531.3	37525.5	41690.1	36092.8	27366.7	38817.5	32613.9	30755.4	38462	51439.3	57334.2	62180.9	61596.2	54342.5	59057.4	65560.5	41890.4	28907.7	31709.9	29483.3	31706.3	33720	49732.3	59663.7	66327.4	106248	82525.5	93472.8	97668	104370	91453.7	76473.5	85627.3	109169	83009.1
125	acceptor	62823.8	57458.6	49994.2	51992.6	63553.2	61464	60578.8	51277.5	50665.1	68993.6	54410.2	52757.9	47194.2	45751.5	57472.4	58925.4	73212.5	67823.6	57452.8	49532.1	51525.1	46480.6	45679	33670.8	28983.8	34100	48052.1	34792.2	43370.4	63948.1	65043.8	61629.5	45910.1	56180.4	51216.1	43723.8	35657.7	26011.3	4638.87	3548.59	648.394	1571.73	3620.07	5226.38	3002.25	4205.03	1304.01	1034.95
125	fret	0.588928	0.580422	0.586798	0.527058	0.63855	0.649526	0.63855	0.516766	0.569842	0.730261	0.561419	0.555126	0.550942	0.556174	0.604977	0.585734	0.669406	0.712037	0.596401	0.60283	0.626582	0.546767	0.470123	0.369696	0.318224	0.356456	0.469121	0.370645	0.398391	0.603903	0.692853	0.660546	0.609279	0.639643	0.60283	0.46812	0.374447
126	donor	75497.6	93989.3	84473.2	58972.3	45041.5	50150.7	75560	59567.1	51256.7	85620.4	79474.2	81566.8	77397.6	68047.5	72609.7	57260.8	53074.4	59577.8	83551.8	66296.2	73715.7	72479.6	80333.3	71042.9	81971.7	81825.7	86206	77396.3	86734.4	84576.8	89752.4	88436.6	52443.7	69510.7	64378.9	70900.9	57088.2	61788.5	77456	50020.5	72831.4	60693.1	52792.9	48163	52447.7	68845.5	87050.4	85577.9
126	acceptor	9669.65	5613.99	19695.7	23035.5	13228.9	35045.5	21128.8	24630.9	44973.2	34234.4	29994	7648.75	7067.38	17252.6	9760.88	11281.6	31915	22980.7	17185.4	21214.4	12492.2	15655.7	7683.96	10249.8	10107.4	9145.55	3145.1	17736.4	24823.2	31743	22885.7	14278.5	32453.2	20002.5	25209.5	13799.2	28018.7	34635.1	15538.7	46124.6	27765.2	35122	36325.2	41994.7	43107.9	18064.4	3473.34	10791.6
126	fret	0.113565	0.0559957	0.188649	0.280484	0.226846	0.411683	0.218381	0.293025	0.467476	0.285713	0.274202	0.0854016	0.0832289	0.202473	0.118964	0.164096	0.375859	0.278391	0.170512	0.242679	0.144801	0.177987	0.0875733	0.126513	0.109242	0.100585	0.0352032	0.186519	0.222615	0.273155	0.203535	0.139429	0.382018	0.223673	0.28153	0.163026	0.329429	0.359398	0.167305	0.479568	0.276297	0.36661	0.407602	0.465458	0.451308	0.207781	0.0384916	0.112484
127	donor	166761	71858.8	166963	148828	157294	134740	127595	170126	185833	157475	135283	135464	106265	156740	123793	122952	201593	149755	123900	99865.2	120641	141651	186696	113134	137541	56056	155782	156240	173683	129916	127243	147817	115040	105211	192020	167442	146528	152364	165643	80835.8	113485	115359	90504.9	142588	133782	159073	199921	205704
127	acceptor	125703	182944	147599	138462	172218	140325	118303	176223	110869	159517	121541	112349	134074	103191	143782	72275.5	72847.2	104781	130566	77719.9	139465	74561.1	66226.7	78472.4	115300	148375	67565	77581.3	39467.4	106774	99395.2	71587.5	118410	131452	129518	115029	109394	89469.2	69229.5	186290	114037	115635	95432.5	102609	134534	113744	55394.9	58465
127	fret	0.429419	0.718371	0.469263	0.482242	0.522268	0.510246	0.481243	0.509245	0.373867	0.503239	0.473255	0.453309	0.557402	0.396649	0.537314	0.369909	0.265518	0.411534	0.51325	0.437377	0.53631	0.345203	0.261597	0.409548	0.456299	0.725509	0.302833	0.331391	0.185408	0.451316	0.438372	0.326462	0.507242	0.555392	0.402602	0.407563	0.42743	0.369909	0.294967	0.696984	0.501237	0.500237	0.51325	0.418486	0.501237	0.416499	0.216604	0.221486
128	donor	38922.8	38262.3	34352.7	27041.6	40223.6	48628.8	24111.5	33407.5	46730.1	34730.8	41550.4	35087.6	26587.9	36315.2	42906.8	36112	49797.3	32545.1	32240.2	44667.2	33835.2	35261.3	37326.6	30659.4	33949.9	37531	20515	33002.3	29527.5	38927.5	31350.6	36330.6	37336	30347.5	41357.9	32400.9	33419.4	33022.4	31495.9	41337.8	27574.5	41331.9	43872.1	41888.4	39401.3	21763.9	43677.1	32545.1
128	acceptor	32547.4	25969.6	24324.4	43265.8	25134.2	41953.6	44109	42384.8	39278.8	23714.1	48338.6	43156.7	41449.9	30852.1	23361	30758.7	23214.1	27602.4	32415.5	28860.1	25865.8	31847.1	44760.4	33528.7	24630.3	26321.6	42856.4	40278.9	38657.4	33199.5	28236.4	25967.9	41701.9	34508.8	34032.5	28212.8	37330.8	32621.3	37749.4	28772.2	37558.5	36739.2	34909.1	21329.8	44192	35125.7	25163.3	32532.4
128	fret	0.45557	0.404196	0.415017	0.615195	0.384587	0.463524	0.646119	0.559017	0.456563	0.406162	0.537735	0.551914	0.609034	0.459545	0.35241	0.459545	0.317561	0.458551	0.501489	0.39242	0.432777	0.474482	0.544817	0.522602	0.420929	0.412063	0.676204	0.549887	0.567147	0.460539	0.473485	0.416987	0.527643	0.53168	0.451598	0.465514	0.527643	0.496476	0.544817	0.410095	0.57631	0.470494	0.442673	0.337858	0.528652	0.617251	0.365059	0.499483
129	donor	5872.88	4183.48	10005.4	6056.58	44996.9	25685.6	20742.7	25627.2	62879.8	47301	33957.4	51399.1	31497.2	44560.8	55808	26495.9	-1131.96	-1087.32	2576.48	711.964	409.794	3599.74	778.922	1839.95	-479.544	1487.99	4193.78	2801.39	-110.418	3592.87	1580.7	2930.16	-1636.72	73.288	1572.12	-337.044	-1775.78	2337.84	914.554	847.596	2990.25	294.764	1630.49	-2445.36	260.426	-2577.56	3853.84	-491.562
129	acceptor	82789.7	64388.6	73005.3	71586.3	28939.6	62771.6	60339.5	52720.3	29648	36352.3	42135.6	29634.5	50913.3	31615.7	21718.3	14321.6	-4475.56	-2563.68	1482.49	-1614.46	1574.64	1586.2	-2051.91	-2910.85	-2625.54	1395.63	-4310.37	1624.26	-1171.55	-3863.63	1981.98	5456.56	5453.05	-2834.87	-3724.67	-1529.25	-897.283	3395.44	-2453.93	3505.93	1537.25	-2048.52	4872.57	1230.9	-4391.41	8546.85	-666.673	322.513
129	fret	0.934157	0.938642	0.879913	0.92157	0.391472	0.709541	0.744602	0.6732	0.320718	0.434562	0.554193	0.365603	0.618047	0.415126
130	donor	22282.5	27546.6	26525.9	31232.3	23930.9	27443.7	26667.9	28318.3	20514.8	12550.7	26910.7	27674.2	32318.9	26558.8	19236.8	26707	33996.1	25011.3	26534.1	25577.2	23290.9	22403.9	20743.2	26241.9	24564.7	28478.8	30917.4	30479.1	30256.9	26104	24212.8	7286.64	12810	19498.2	35111.4	29302	20986	22978.1	19090.7	34621.7	26188.4	33734.7	27593.9	37949.3	25614.3	31890.8	22052	30435.9
130	acceptor	37455.9	32615.3	42139.1	27733.7	36297.1	34826.4	33675.3	35064.1	36711.4	57842.6	39000.6	40423.3	19844.4	42631	41566.4	31596.5	32305.7	39818.4	48410.6	40238.4	43805.7	35818.3	59601.5	46158	35582.3	47555.8	39930.5	40840.7	36876	45859.8	43558.8	67810.1	65032.2	38513.3	34361.5	39630.7	39901	56695.8	47952.5	39693.4	31636	25961.8	34564.4	34053.9	33862.8	31316.2	41490.8	36692.4
130	fret	0.626704	0.54176	0.613941	0.470711	0.60312	0.55964	0.557656	0.553686	0.641396	0.821553	0.591298	0.593271	0.380449	0.615906	0.683313	0.54176	0.486796	0.613941	0.646285	0.610992	0.653123	0.614924	0.742271	0.637481	0.591298	0.625723	0.563605	0.572519	0.549713	0.637481	0.642374	0.902582	0.835768	0.663853	0.494822	0.574498	0.655076	0.711421	0.715287	0.533797	0.546732	0.435376	0.555671	0.472724	0.569549	0.495825	0.653123	0.546732
131	donor	79481.8	67388.5	82882.1	78205	88449.3	70370.1	86694.2	75584.9	53235.9	69377	72916.9	74154.8	83410.6	70793.4	85614.2	70937.6	74651.3	75507.1	66841.7	53293.1	89060.3	94620.6	66951.5	65047.7	72429.5	64693	67553.3	68036.1	89595.7	95597.7	66649.5	71836.8	80040.1	83483.9	77147.8	80234.6	92517.8	82930.1	80879.9	72473	96764.7	85216.1	85600.5	77200.4	94249.9	71651.5	80545.8	75349.3
131	acceptor	11952.9	20975.5	32106	26760.6	16621.2	19197	12928.7	25971.4	16598.4	9317.64	21082.5	21245.5	27138.7	27594.5	16359	26951	30185.1	21607.1	25618.1	17135.9	35362.7	8622.85	27512.4	34566	30204.1	18976.8	29126	14294.2	17232.8	13329.6	22416.8	21618.3	14224.8	17353.5	14401.7	10378.1	11327.9	26594.4	24514.7	20368.5	18771.9	24890.9	8717.72	18257.1	14796.2	12627.8	21864.6	24646.5
131	fret	0.130472	0.23712	0.279027	0.254953	0.158403	0.214199	0.129768	0.255772	0.237922	0.118597	0.224402	0.222824	0.245186	0.280712	0.160593	0.275666	0.288336	0.222824	0.277345	0.243569	0.284092	0.0833527	0.290878	0.347271	0.294313	0.226774	0.301193	0.173855	0.161324	0.122071	0.251685	0.231539	0.151148	0.17237	0.157675	0.114448	0.10895	0.242762	0.232335	0.219677	0.162788	0.225983	0.0926854	0.191112	0.135414	0.149705	0.213419	0.246806
132	donor	57168.4	62948	56550	51201.2	45666.3	52004	52420.1	53007.5	54343.9	57721.5	59692.7	58118	63750.8	63690.4	62050.5	43182.8	51607.5	63659.4	62143.5	43907.3	52203	54603.3	63561.5	60474.3	59418.5	68267.4	56647.9	61743.8	49845.2	72849.3	53555.7	58178.4	66002.6	56554.9	47267.1	54409.1	69052.3	63388.5	49068.5	55562.8	48846.6	52442.9	61348.9	48233	55619.9	65284.6	57178.2	68639.4
132	acceptor	26397	9759.64	20025.4	20880.5	24986.9	25997.6	25687.2	13324.8	28951.2	12551.4	6313.95	12729	6639.36	13880.5	7798.99	17756.8	12257.4	8098.72	3070.65	10045.6	13056.9	17424.5	15366.5	8810.33	17206.7	25646.7	25396.4	14867.3	13016.5	14691.8	16723.2	15248.4	18672.4	16173	35978.1	18365	9214.55	4107.73	16540.8	25049.9	26483.8	26997.4	35831.5	32006	15600.7	15266.2	23187.2	13865.2
132	fret	0.315781	0.134059	0.261752	0.289558	0.353704	0.333726	0.328992	0.200709	0.34798	0.178298	0.0957578	0.180083	0.0940306	0.17919	0.111356	0.291423	0.191721	0.113095	0.0469944	0.186343	0.199808	0.241548	0.194414	0.127051	0.224226	0.272839	0.309201	0.194414	0.207019	0.16761	0.237892	0.207922	0.220594	0.222409	0.432201	0.252549	0.117448	0.0605865	0.252549	0.311079	0.351794	0.339419	0.369026	0.398969	0.21878	0.189927	0.288627	0.16761
133	donor	36214.3	46682.9	43439	33896.1	34320.4	40021.4	30690.7	40484.3	42582.6	42220.1	48588.4	49818.9	38397.5	44052.3	52769.7	42424.5	5926.93	35014.7	39234.5	45066.7	38949.1	31072.5	35149.7	46517.1	47446.7	43076.4	43674.3	40395.6	42898.9	39469.8	47874.8	49579.7	45780.3	54636.6	36792.9	52102.4	17059	49849.8	63705.1	51500.7	43006.9	30929.8	53120.7	65869	56596.1	38987.7	51986.7	45734
133	acceptor	34596.5	26646.4	37693.3	46620.5	29986.8	33080.8	34573.1	38003.6	34772.2	23079.6	15330.9	25166.7	26878.4	33767.8	26343.1	32852.9	55661.9	30654.6	23572.4	22653	28022.6	27848.1	16121.4	10379.7	34345.3	11263.9	20283	25149	29907.1	32811.3	35730.8	26255.6	20314.6	31075.5	33397.4	15109	41951.6	27177.5	7595.95	16742	18981	34741.5	34122.7	6068.3	17633	27068.1	20231.9	8056.33
133	fret	0.488514	0.363855	0.464524	0.5793	0.466515	0.452606	0.529975	0.484501	0.449635	0.353317	0.24002	0.335211	0.41129	0.433839	0.333313	0.436794	0.903552	0.466515	0.375396	0.334262	0.418134	0.472498	0.314396	0.182865	0.420092	0.207211	0.317225	0.384084	0.410314	0.453597	0.426957	0.346633	0.3078	0.362895	0.475494	0.224477	0.710794	0.352361	0.106781	0.245528	0.30592	0.528947	0.390861	0.0842055	0.237271	0.409338	0.279742	0.149859
134	donor	64812.8	86136.4	72102.1	68978.9	68774.9	77088.1	64971.5	61374.6	57576	88172.4	58798	80384.2	92245.4	98885.5	93915	82657.7	61933.1	56392.1	49496.7	38609.3	61020.1	104002	108923	110200	99077.7	88346.6	68085.1	83380.9	84209.1	56891	61961.7	80113.3	81531.1	80756.6	82452.4	95116.8	83753.2	74977	70655.7	95445	92885.1	57661.9	65815.2	92656	45490.4	75496.1	56708.4	56973.3
134	acceptor	35339.6	14166.2	2955.22	3443.64	10267.4	6236.03	2062.35	-484.763	16471.7	4007.83	18649.2	38613.2	11113	5828.69	894.146	14007.4	18028.6	10228.5	2107.07	12109.8	44188	-932.586	5190.79	3333.08	8356.44	9503.85	54499.6	12854.2	29502.7	62284.6	58406.5	29746.4	17702.9	29443.7	16018.3	-2137.43	24676.2	26522.1	25024.9	13549.8	-3071.6	59426.8	46889.2	14420.6	78282.1	45512.4	48868.2	39431
134	fret	0.353172	0.141576	0.0387977	0.0472121	0.129959	0.0746788	0.0303573	-0.00856025	0.222641	0.0436091	0.240574	0.324129	0.107747	0.0556008	0.00975077	0.145051	0.226013	0.153143	0.0412044	0.238344	0.419707	-0.00856025	0.0460116	0.0291494	0.0782411	0.0971618	0.444606	0.133449	0.259495	0.522876	0.485569	0.270561	0.178417	0.267246	0.162361	-0.0232968	0.227136	0.261712	0.261712	0.124131	-0.0344009	0.507818	0.415534	0.134611	0.632511	0.376602	0.463121	0.409261
135	donor	21869.8	23950.1	31577.4	28730.3	27173.7	27784.6	26699	22162.9	58380.6	23605.4	25937.3	21688.2	25447.9	26728.5	22896.4	24906.9	29987.6	30109.1	23885.1	28053.2	23446	28904.5	22383.7	26978.7	30632.9	21468.6	33060.4	33920.2	23377.3	28427.4	32872.7	22135.9	27049.8	24596.6	23632.4	26329.8	56559.1	121275	133456	134124	138848	130205	125630	136396	137826	132618	132021	130779
135	acceptor	150656	125554	52984	56134.1	55306.6	56616.2	66081.9	65929.3	62948.7	64627.5	58354.9	62305.2	53013.8	53618.9	60743.8	55879.4	64792.8	57781.1	70003	52444.2	50681	45842.6	49522.7	45281.2	59838.1	47444.9	67066.7	60158.2	53195	52352.8	52137.8	51613.5	55126.4	54296.2	55248.8	52475.4	41179.1	-4197.88	-2588.16	-2507.04	-2442.66	-5669.41	-1258.79	-4535.52	-1713.85	1668.16	-2907.79	-5767.98
135	fret	0.873062	0.839465	0.62648	0.66189	0.670434	0.670434	0.711825	0.747992	0.518451	0.732299	0.692149	0.741536	0.676115	0.667589	0.725805	0.692149	0.683672	0.657131	0.745227	0.65141	0.683672	0.612973	0.688385	0.62648	0.660939	0.688385	0.669486	0.638974	0.694968	0.648545	0.612973	0.699661	0.670434	0.688385	0.700599	0.66569
136	donor	11940.2	15333	15327	12529.8	13754.5	48826	45259.4	23913.7	43086.2	39136.4	48087.7	48587.1	63723.7	85593.3	89181.8	68834	96182.6	93713.3	92769.4	93272	97764.4	93365	104762	99329.9	107948	106387	96306.3	96620.2	94498.1	92399.8	105528	95189	97568.7	97623.1	98873.8	136634	91346.6	93913.2	98102	110003	102651	97153	96168.2	99933	99654	97551.9	103717	105638
136	acceptor	76088.2	81268.5	93464.9	86047.9	59547.4	60400.1	60903.3	74691.3	52578.5	79967.8	61404.2	67973.8	22951.9	1147.47	-4224.52	901.747	-1518.77	-2993.21	-4174.23	-1910.28	-3645.15	-6314.75	-4222.01	-3029.55	624.797	-7236.69	-2548.4	-2709.69	-2700.16	-2463.55	18.92	-4288.2	-3330.24	-4674.1	-1542.56	-728.627	-2766.23	-262.344	1922.23	-441.974	-2459.19	-4348.27	-3410.53	-4073.82	-2443.81	989.126	-1004.46	-4179.05
136	fret	0.864276	0.840926	0.859223	0.872869	0.812348	0.553318	0.573285	0.757134	0.549276	0.671016	0.560352	0.58312
137	donor	104617	101589	97884.2	91396	98732.6	102733	109781	109636	105291	107393	108265	109254	98761.9	103193	117253	89266.9	101990	87153.1	62286.4	112760	95748.1	104731	93673.8	117757	118575	99953.5	105141	104417	94030.1	119297	121093	120637	122593	139193	119010	116915	95401.9	108046	126593	129823	133246	123528	127619	103796	120071	123264	104388	110250
137	acceptor	29598.5	11393.7	14956.2	12489.2	5739.1	11044.7	17689	8483.1	10468.5	8015.13	17407.2	15348.5	22042.3	17265.7	6027.25	9086.55	12418.5	13308.7	15504	10123	15487.4	19323.8	11648.2	14620.2	6716.34	22774.9	12864.5	7456.11	6475.96	-4176.82	6035.26	1866.31	133.809	-1736.54	-4009	-5964.33	1349.36	7507.3	-556.806	-1548.84	4588.97	1626.64	-826.296	243.512	-1537.91	-938.42	3701.37	7137.48
137	fret	0.220695	0.100472	0.132155	0.119894	0.0552771	0.0972573	0.138733	0.0717769	0.0900492	0.0694091	0.138733	0.123155	0.182156	0.143684	0.049037	0.0924483	0.108536	0.132155	0.199172	0.0820787	0.139557	0.156129	0.11096	0.110151	0.0537148	0.185545
138	donor	-581.763	1222.1	3187.81	825.301	966.268	-201.934	-1116.92	-2727.6	-1011.19	-1239.61	-275.028	3074.25	1970.01	1180.33	-316.796	602.102	3003.77	3900.48	12726.6	16887.8	28499.3	23967.5	2484.28	2665.71	-194.103	40434.5	81496.5	83680.2	88988.7	81133.7	76201.1	80629.8	87875.3	87580.3	82001.7	76360.4	87217.5	83290	88658.5	81941.6	82072.2	83834.2	84265	77884.9	72430.2	84302.8	79123.6	79271.1
138	acceptor	79908.5	78993.9	72714.1	97609.5	78572.9	68855.2	81413	75779	69471.9	72680.5	85316.5	75985	89308.2	90633.6	79044.7	82383.9	84946.3	86356.1	62918.1	58108.4	63991.3	52421.3	81024.8	91901.8	81297.4	45756.5	-3047.14	-3666.51	-10027.9	-4286.57	1761.1	-1745.17	-252.064	-4035.31	-8006.87	-4203.4	-2343.32	-2815.22	-7960.41	1660.91	2516.67	1049.34	-1156.19	5114.35	-1818.13	2002.07	-4395.06	-5585.58
138	fret	1.00721	0.984749	0.957791	0.991497	0.987824	1.00305	1.01377	1.03713	1.01495	1.01732	1.00305	0.960974	0.978563	0.98721	1.00426	0.992717	0.96604	0.956515	0.831664	0.774704	0.692228	0.686134	0.970446	0.9717	1.00241
139	donor	20926.2	19376.7	20526.2	15808.5	10841.5	6789.42	10857.6	1535.97	4597.91	12967.6	11421.8	13508.4	240.823	6133.82	11540.4	8745.1	17880.3	9787.15	22804.1	50710.9	51680.1	50315.8	52612.3	51983.8	64325.4	44627.8	46731.6	43185.7	59247.3	50741.8	50387.4	58086.7	50650.4	52576.5	56828.6	54627.2	52653	57601.5	49910.9	62922.9	54360.6	61582	61954.9	59778.2	53066.6	59493	62309.2	68662.8
139	acceptor	32931.2	28731.6	34468.8	37674.8	48587.5	55355.9	53095.4	54192	56586.1	57552	46918.9	54802.4	51161.8	59768.7	44411.3	48422.7	45464.5	41571.5	29045.8	4381.45	7682	4370.8	3050.28	10207.4	9354.13	5464.21	6882.4	8640.03	6976.67	-488.971	5844.21	5130.02	2366.35	6630.02	5045.01	-255.42	6970	2185.43	9312.57	4492.21	-926.619	9233.95	8859.3	6256.7	2340.54	3434.22	9173.87	4557.69
139	fret	0.61121	0.596773	0.626484	0.704617	0.817413	0.890892	0.830164	0.972225	0.924865	0.815706	0.804567	0.801986	0.995404	0.907155	0.793355	0.847018	0.717313	0.809717
140	donor	24020	17476	20507.9	26571.7	26101	20429.8	20961.4	23520.8	18099.1	18958.6	23435	25820.9	17319.7	20496.5	21411.2	22884.3	26053.4	26493.6	29809.5	26102.9	27892.4	29155.8	17028.1	19678.9	32685.1	33361.6	22259.2	31153	25195.8	17744.7	24658.4	12991.9	10167.7	9397.84	20033.4	26160.1	24730.9	29733.2	15953.3	24138.2	21146.3	27764.7	23446.4	31488.4	21115.8	26535.5	28816.6	23234.9
140	acceptor	28553	39935.5	32563.6	38547.6	32058.3	36305.2	40873.5	51078	35219.4	53055.6	27665	42910.1	32133.5	40894.2	40672	40321.1	42454.6	40488.2	42704	41458.9	33114	29779.9	33947.5	36690.2	38799	41753.5	39394.3	31419.5	38569.3	40242.1	45512.9	45799.9	55868.4	57552.7	40294.3	40993.1	43752.6	42366.6	38907.4	36486.8	35933.3	27834.6	29695	27705.3	33869.7	34977.2	49214.4	54459.1
140	fret	0.543374	0.695907	0.613941	0.591586	0.551302	0.639932	0.660939	0.684615	0.660939	0.736915	0.541388	0.624553	0.6495	0.66569	0.655225	0.638015	0.61973	0.604237	0.588658	0.613941	0.542381	0.505403	0.66569	0.650455	0.542381	0.556246	0.638974	0.502384	0.605208	0.694029	0.648545	0.779131	0.845674	0.859845	0.667589	0.610068	0.638974	0.587681	0.709023	0.602295	0.629368	0.500369	0.559208	0.467933	0.615876	0.569059	0.63033	0.700599
141	donor	40439.9	42310.8	50926.8	45903.5	37940.8	42299.3	52708.3	47175.9	56839.8	43505.3	55688.8	48576.8	49833.2	56151.9	43411.3	43892.8	50686.1	55677.4	50991	46433.1	51445	42269.5	45529.8	53327.3	43409	45064.3	48884	41109.4	39995.1	36670.7	47320.4	51754.5	46281.8	55214.2	43771.2	43525.9	49133.9	38669.9	45885.1	54620.4	58084.7	42913.8	41508.3	46226.7	47224.1	47730.8	50287.2	43580.9
141	acceptor	10791	21027.1	4475.9	11255.9	19927.3	14277.3	12707.9	11627.3	6913.13	8599.36	13538.9	22654.3	19805.2	9729.51	14137.3	17828.7	14626.6	8130.05	8627.71	16397.6	4932.8	13158	6889.93	13194.2	9170.7	11167.3	11742	6955.86	8937.85	19200.5	9156.08	17743.2	8876.51	16569.3	14468.6	13686.5	11293.1	19944.9	10221.2	17676.1	10538.9	18484.2	7508.71	15544.5	17643.8	15543.5	2245.85	6794.3
141	fret	0.210837	0.33245	0.0804823	0.196895	0.344423	0.252681	0.193907	0.19789	0.108324	0.165037	0.195899	0.318484	0.284577	0.148118	0.245705	0.288566	0.223786	0.127223	0.145132	0.260653	0.0874418	0.237734	0.131203	0.19789	0.173995	0.198886	0.193907	0.145132	0.182955	0.343425	0.162051	0.25567	0.161055	0.230759	0.248694	0.23873	0.186937	0.340432	0.181959	0.244708	0.153093	0.301529	0.153093	0.251684	0.271618	0.245705	0.0427138	0.135182
142	donor	57279.6	51978.5	51775.1	49003.6	52798.9	72110.6	72504.1	72832.6	41519.8	45611.9	48958.6	46724.1	56105.6	63909.7	68246.9	41688.2	49208.8	51766.7	64029.7	53454.3	53644.4	48199.9	40402.5	36063.6	40939.5	48931.9	43902.7	66517.7	57489.7	46654.1	52070.2	43132.3	65557.2	52136.9	59854.3	68145.2	67251.4	58105	61296.7	49350.5	47102.7	57581.4	50604.5	56144	50721.2	64134.8	50983	59057.2
142	acceptor	10947.6	20017.4	27640.2	26687.1	19168	20678.9	12901.3	26348.2	30163	19393.5	18460.9	24557.4	20283.1	17026.5	12436.3	16298.3	18516.8	14398.4	5307.89	19871.4	16759.9	13254.5	34692.6	39775.8	22095.7	14770.9	23252.2	18162.6	13535.3	33697.1	19679.7	20923.7	19945.7	15328.1	17419.8	12431.4	16117.5	15954	19177.4	25697	14478.1	25013.6	17048.1	14906.3	19449.4	16225.9	11570.2	13017.3
142	fret	0.160308	0.277907	0.347984	0.35299	0.265775	0.222834	0.151298	0.265775	0.420593	0.29785	0.273873	0.344213	0.265775	0.210027	0.154309	0.280588	0.273873	0.217153	0.0765101	0.271174	0.238253	0.215732	0.461734	0.524524	0.35049	0.231265	0.346728	0.214308	0.191281	0.419425	0.273873	0.326429	0.232666	0.227051	0.225642	0.154309	0.192734	0.215732	0.238253	0.342953	0.235463	0.303105	0.252094	0.210027	0.276564	0.201415	0.185448	0.181052
143	donor	27244.3	30176.5	30701.9	28174.2	26810.1	24070.2	32304.7	27993.5	25848.7	32926.2	25805.6	30652.2	27481.4	18930.3	28933.3	32936.2	36085.4	29546.6	30285.8	23163.6	30246.1	36600.9	31550.5	27496.3	24264.1	18161.2	28472.5	22672.9	29972.6	29946.1	36453.4	27038.8	27663.7	30368.7	45544.8	39783.3	34578.8	23074.1	25785.7	41202.1	32284.8	28533.9	27517.8	27204.6	31391.4	32601.4	32183.7	41139.2
143	acceptor	17156.2	19550.3	25720.2	17909.9	3492.76	14672.7	16706	16097.3	6562.82	17481.3	29101.3	18269.7	6167.84	22245.6	8403	33714.4	35219.2	12695.1	7840.71	15242.5	27245.3	21666.9	28353.1	10446	14428.2	13355.6	15669.5	25246.3	22482.1	2678.49	13324.2	16347.5	18503.6	9924.7	21193.3	12739.4	19308	20435.5	7600.16	2006.2	19383.2	22589.4	10417.5	14007.6	8200.42	8257.7	11863	19972.3
143	fret	0.386824	0.392941	0.455794	0.388864	0.114901	0.37866	0.340764	0.365374	0.202639	0.346925	0.529997	0.373552	0.183714	0.539957	0.224648	0.506028	0.494008	0.300574	0.205787	0.397015	0.473925	0.371508	0.472919	0.27571	0.37253	0.423432	0.35513	0.527006	0.428503	0.0818214	0.267401	0.376618	0.401086	0.246582	0.317091	0.24241	0.358204	0.4699	0.227786	0.0464211	0.375596	0.441656	0.274672	0.339736	0.206837	0.201589	0.269479	0.326365
144	donor	43824.8	34035.6	47202.7	61525.4	22315.3	125425	30811	32651.1	40749.4	32716.5	35165.6	42143.1	40129.2	41669	42526.2	20974.8	35903.3	33457.3	26987.7	40490.9	30519.8	38761.1	21242.4	19495.3	26180.5	25212.9	32911.7	31479.2	39686.8	41031.4	35032.8	32144.4	35574.3	27878.6	23215.4	35584.5	19158.1	33070	41491.2	46399.6	45008	46373	44248.8	34034.6	37993.8	42040.9	41491.2	41148.9
144	acceptor	78388.5	111948	117477	99731.6	96194.8	139226	104924	89739.9	86391.2	89109.8	93557.7	72116.9	76295.7	89856.3	84346.3	78412.3	85806.7	103119	120720	100803	98628.5	88719.4	71143.7	81246.3	97823	96178.7	98200.1	101661	94839.9	97145.2	99491.3	90672.1	89757	105183	127062	112937	111839	107116	109613	113897	114115	94992.5	85581.4	87975.1	96357.7	99250.1	83609.8	83224.2
144	fret	0.641246	0.767012	0.713731	0.618149	0.811176	0.526418	0.772499	0.7332	0.679412	0.731031	0.726697	0.630727	0.654964	0.683682	0.664515	0.789004	0.705116	0.754973	0.816739	0.713731	0.763724	0.695453	0.770303	0.806732	0.789004	0.792318	0.749516	0.763724	0.705116	0.702966	0.739716	0.738629	0.715888	0.790108	0.845825	0.760439	0.853701	0.763724	0.725614	0.710498	0.716967	0.671955	0.6592	0.721288	0.716967	0.702966	0.668764	0.668764
145	donor	35087.8	38155.4	39916.6	53890.4	38000.1	37100	45497.2	36979.7	44496.1	46677.6	69028.2	112037	102870	108688	106256	87401.7	111512	103967	136256	95106	104354	102023	99677.4	92440.1	91074.7	98109.4	98385.5	115753	116526	93503.1	99857.2	98857.2	71868.7	-3181.12	-3559.39	-6192.1	-1179.44	-3604.92	-1157.25	-989.134	-4766.58	-1829.73	-3793.47	-2008.95	-2657.49	-3892.12	-1262.91	-6053.75
145	acceptor	41851.3	50638.9	65582.5	54298.3	53605.5	72858	63864.9	55811.4	66745.5	57242.7	45031.3	881.126	-2368.16	-5177.3	-4239.37	3142.42	-4340.17	-214.699	-1572.77	-3474.99	-6075	-3806.51	-690.724	324.814	4010.27	102.414	-1395.78	-4393.68	-1141.61	-1388.61	-338.574	-5816.76	1349.06	-528.718	-939.118	-3863.68	2319.39	-4451.33	2117.1	546.376	-366.143	-3164.37	-3811.57	-1025.94	2090.79	-746.055	2548.77	-1793.42
145	fret	0.543982	0.569811	0.621195	0.502065	0.585664	0.662433	0.583684	0.601474	0.600487	0.550945
146	donor	86715.7	76240.2	87329.4	83050.7	81955.5	86810	89180.4	78826.4	80869.6	73214.7	77117.5	76648.9	87007.2	71803.7	81140.4	85202.6	68851	84381.7	82282	70813.5	80411	66113.4	49208.1	37383.1	49165.3	28193.6	29570.3	42018.3	25658.1	7439.12	36154.3	39203.5	44845.9	34412.6	35049.1	32769.4	40143.6	38864.8	12968	14792.6	53961.2	41280.3	17596	20980.9	19319.9	21002.3	57280.3	61794.7
146	acceptor	3086.35	-301.817	5749.9	4410.62	8262.86	9003.15	5951.29	5232.38	1731.53	5484.5	9895.44	4616.6	3022.21	2948.53	-109.272	3207.1	9288.41	4313.32	7956.59	8137.93	3242.78	13774.6	34628.1	31773.6	28662.1	32877.1	38252.3	37943.4	41967.3	54928.7	40022.6	30476.2	30684.9	32757	29882.4	40847	26863.2	32752.6	56004.4	47113.5	21917.1	27922.4	49895.8	46116.8	38287.2	40061.9	5273.35	-2469.73
146	fret	0.0339834	-0.00387926	0.0621953	0.0505155	0.091432	0.0943586	0.0621953	0.0621953	0.0213526	0.0699866	0.113883	0.0563543	0.0339834	0.0398163	-0.000969903	0.0359275	0.118767	0.0485696	0.088506	0.103142	0.038844	0.172597	0.412582	0.459409	0.367872	0.538422	0.563504	0.474382	0.62084	0.880833	0.525394	0.437473	0.406613	0.48737	0.460407	0.554471	0.400646	0.457414	0.812389	0.7615	0.288691	0.40363	0.739157	0.687476	0.664226
147	donor	90165.4	87264.8	59945.9	44756.8	82615.1	84294.9	79192.5	78953.4	79666.6	86479.3	101596	107108	93968.6	100108	76659.1	89554	98154.3	87731.8	94997.2	89354.6	87501.8	95999.4	83187.9	89884.6	98404.5	111090	92517.7	89108.3	97551.9	57962.9	56.248	1594.59	-832.981	-1333.55	-1333.55	-3212.74	-4930.15	2743.27	-3552.56	-1567.56	831.524	-1611.31	-5703.39	2954.89	1651.57	636.179	-1538.06	1612.91
147	acceptor	3394.1	5965.72	19600.2	50078.5	17139.3	16348.2	16191.7	14960.8	14658.1	17456.2	-2986.98	-2186.69	8139.51	7032.98	4211.42	1763.05	2998.31	2702.8	6042.35	2189.8	1685.9	-691.293	1976.19	928.665	4880.4	-2280.05	-6423.29	1270.86	4916.89	-1600.57	-536.748	4516.35	427.989	-1247.26	-2584.08	-581.882	585.039	-133.558	-1550.77	2756.18	311.101	-67.49	7536.49	-1578.28	1037.19	1849.11	-4725.13	-2377.19
147	fret	0.0361869	0.0636592	0.246705	0.52837	0.171917	0.162776	0.169623
148	donor	37648.8	44549.7	44007.1	41327.3	43517	36265.6	41150.4	42487.6	45418	38801.5	37298.8	35364.9	36002.7	39130.4	37387	41394.9	39085	38750.2	43548.4	41167.7	42017.5	39827.2	42494.1	36234.7	37066.7	45519.1	41669.1	45244.8	40357.9	42040.8	45599.7	38606.8	46335.9	41518.2	43336.9	42401.6	34729.2	39714.7	43734	40780.9	45975.1	40921	36610.7	40739.8	46793.1	35774.4	46746.5	47622.3
148	acceptor	22915	13296.5	20674	23307.1	20669.1	19395.9	16764	18131.1	25167	16715.3	21479.6	20358	15920.9	17813	17135.4	25729.8	17288.9	28611.6	18923.1	19695.6	20335.3	17601.4	23811.9	25755.4	29733.9	21834.3	20727.4	13561.9	17534.5	14093.7	26412.9	15982.1	14917.1	22602.7	21741.7	22645.3	26456.9	23599.4	14963.3	16719.6	20613.8	16572.9	25286.9	27959	22251.5	22125.4	15451.3	11012.1
148	fret	0.378586	0.230214	0.319164	0.360865	0.322583	0.348585	0.289243	0.299659	0.356406	0.300812	0.365313	0.365313	0.306568	0.312305	0.314594	0.382988	0.306568	0.424238	0.303117	0.323721	0.325996	0.306568	0.358637	0.415638	0.445546	0.323721	0.331668	0.230214	0.303117	0.250508	0.366423	0.292722	0.243372	0.353065	0.333932	0.348585	0.432794	0.373068	0.255249	0.290403	0.310012	0.288081	0.408076	0.406993	0.322583	0.381889
149	donor	51837	66165.4	41666	42944.1	22187.7	22866	26481.4	18177.8	19330.2	32396.3	20507.8	18223.8	7496.06	2419.49	-450.599	2200.73	3654.61	3894.31	4528.62	1237.75	1161.34	2292.84	2920.87	676.712	217.205	758.356	-438.038	-945.695	-3717.39	2238.41	-342.787	858.841	-378.376	-1022.11	3500.75	-1388.46	-1504.64	-1094.33	-181.593	-411.87	2329.47	-409.778	1113.19	-2119.06	2728.27	445.389	-979.19	-718.558
149	acceptor	51933.4	42286.2	55817.5	58384.5	77569.2	79483.1	65967.1	77605.2	88484.5	62068	80943.5	89777.1	24963.9	3445.55	2159.55	3535.57	2333.75	2689.5	5871.64	-140.803	3752.33	4574.8	4724.16	4606.47	4928.53	7471.63	1189.53	5145.01	3628.8	7241.54	1675.4	1979.75	4964.15	369.962	5236.85	8837.78	-80.819	7900.15	1489.28	4586.19	1432.9	2011.13	4290.53	3546.97	-226.022	4279.79	1129.65	8050.56
149	fret	0.500057	0.389686	0.572669	0.576603	0.777724	0.7768	0.713303	0.809919	0.820883	0.657191	0.797998	0.830901
150	donor	68197.6	66284.4	50367.6	46377.1	58646.2	61700.2	46152.8	68454.3	69659.4	51573.9	60921.2	58142.8	54820.3	63006.7	52859.2	62648.5	47606.4	56614.9	50527	50508.1	61720.2	61828.2	68485	60332.2	52530.5	52091.4	57995.2	52251.4	64562.9	109035	107227	109139	105305	108657	112451	107263	101723	112323	119945	106575	104411	115744	108025	102439	104339	106663	109330	112301
150	acceptor	51586.9	56950.9	51515.8	58600.7	48185	47526.7	68251	46102.9	40911.2	50306.9	45365.5	49107.7	47796.3	49846.6	44880	37668.8	63179.9	45832.3	62863.9	45044.4	46456.7	48569.1	47114.6	51926.2	52716.4	52859.7	49005.4	48369.9	39203.1	592.98	-1502.63	-2146.68	-6489.66	1382.79	-1072.51	-5158.96	367.912	-5287.83	1967.5	-3716.62	-6305.06	-2044.35	-3676.55	1329.07	2747.72	-2430.96	1335.52	-285.829
150	fret	0.43095	0.462051	0.5061	0.558015	0.451022	0.434966	0.596852	0.402812	0.369592	0.494097	0.426933	0.458041	0.46606	0.441992	0.459044	0.375637	0.569976	0.447009	0.554027	0.47107	0.429946	0.439985	0.40784	0.463053	0.5011	0.5041	0.458041	0.481085
151	donor	32675.2	38978.6	28355.2	23952.5	43888.3	33675.7	30778.5	36243.9	30460.9	33674.7	31695.3	27696.1	31984	29496.5	29128.2	37778.4	35148.1	29073.3	38885.5	32040.9	33304.3	27952.7	33472.9	14218	22866.1	34056.5	34712.5	34412.4	34231.4	26607.6	37941.8	33282.5	28396.6	30443.3	37298.2	41851	34019.2	26836.3	27098.1	30023.2	24935.5	36786.1	39954.3	22389.1	29271	39000.3	32077.1	37004.4
151	acceptor	33901.8	26753.6	31966	41780.4	30664.7	31218.7	44026.6	35961	40612.1	23016.6	34443.5	44381.2	37379.4	37238.4	38746.8	43506.3	38001.2	42340	31933.3	25774.1	30012.5	47801.8	38513.4	44828.2	36629	36013	39283.5	30195	31669.3	33149.1	41621.2	43279.9	35229.3	31584.3	35420.3	27493.7	38953.8	40355.3	36122.6	35779.4	43403.1	29821.7	25662.9	34757.9	30270.3	37795.6	39465.2	38850.9
151	fret	0.50963	0.407016	0.529686	0.635693	0.41098	0.480624	0.588094	0.497617	0.570937	0.406025	0.520656	0.615409	0.538726	0.557835	0.570937	0.535712	0.519653	0.593147	0.450713	0.445737	0.473636	0.630618	0.534707	0.759352	0.615409	0.513638	0.53069	0.467651	0.480624	0.554815	0.522662	0.564889	0.553808	0.50963	0.486618	0.396122	0.533703	0.600224	0.570937	0.543751	0.634678	0.447727	0.391177	0.60832	0.508628	0.492616	0.551795	0.512636
152	donor	3379.6	-1268.08	4618.39	5762.3	4214.25	680.609	6370.28	8470.08	3235.51	476.779	2021.32	1984.42	4946.98	4324.95	9262.55	34994.3	36196.2	10951.2	73295	72277.7	69847.5	72346.2	65793.7	84238.6	72912	66336.7	64695.5	81622.2	96702.1	90690.9	78570	68306.5	65758.6	64653.4	63773	63052.6	64372.2	66036.2	73774.7	66512.4	71262	66110	69682.3	55287.7	68267.8	72597.5	91717.1	68812.5
152	acceptor	71701.8	69011.3	70943.6	67125.1	61417.9	66154.1	71404.1	62141.1	65707.4	63805	71442.5	67411.6	68976.7	58247.4	68921.2	16754.5	8464.25	4775.09	-3906.05	2497.57	-2552.88	202.966	6196.98	-2970.99	-5399.03	-1360.15	120.574	-2544.19	6186.28	2260.84	-493.066	3161.74	339.89	-4185.58	-5095.57	739.682	-1827.27	3774.97	-3621.9	-1993.26	-1177.27	-4642.87	-3347.81	3552.49	2259.78	211.744	3178.43	-5049.78
152	fret	0.95478	1.01925	0.939465	0.920724	0.935942	0.989228	0.91839	0.880135	0.953599	0.992815	0.972549	0.971361	0.933596	0.931251	0.881287
153	donor	64138.5	46936.6	20559.7	33920.4	37195.8	43256	41848.2	21930.7	50326.5	36035.9	47861.4	28234.6	15395.3	10783.9	26307.9	31085.2	35063.2	27205.4	25709.6	42036.3	26139.6	35687.1	20040.9	40968.7	33167.3	33652.8	27237.1	24943.8	33026.3	32638.2	32987	31745.9	30735.6	31324.5	27089.2	14518.3	28850	27628.5	37956.5	26426.7	16560.3	28547.4	34391.3	30268	35825.6	36094.9	36844.5	37012
153	acceptor	14256.7	19179.5	33196.2	19615.6	10891.7	2159.41	17328	12556.1	-530.708	12610.5	12413.8	23239	34571	38164.1	11633	17498.6	16374.8	12911.7	18559.1	13884.3	28917.4	14184.5	26878.6	19958.5	22529.4	29964.8	33346.5	19997.4	21245.6	29155.5	17862.9	10819.9	13427.5	25538.2	27077.3	34074.2	31470.8	17913.9	11591.1	20061.6	23680.3	16080.9	22024.2	27326.9	24651.8	15629.5	19455	11813.6
153	fret	0.182179	0.290108	0.617565	0.366619	0.226684	0.0471472	0.293085	0.363633	-0.0107927	0.259368	0.205905	0.451335	0.692002	0.779785	0.306981	0.360649	0.317905	0.321878	0.41941	0.248469	0.525309	0.284156	0.5724	0.327839	0.404458	0.471308	0.550347	0.445346	0.391507	0.472307	0.351697	0.254413	0.304003	0.449339	0.500295	0.70107	0.521305	0.393499	0.233613	0.431377	0.58845	0.360649	0.390511	0.474305	0.407448	0.302018	0.34573	0.241535
154	donor	36367	28192	31000.7	26768.6	30547.3	11756.9	30563.6	32342.7	35503.7	43492.7	38803.7	22422.8	10532.2	30848.9	33029.1	41388.4	34810.1	22142.8	26389.3	34074.9	33572.8	27881.3	32084.4	33581.8	29830.2	32340.9	45629.5	32937	37945.7	15336.9	31352.9	28679.6	35034	36372.5	35911.9	26564.5	24196.5	26855.3	20614.7	31853.2	32774.4	27334	30077.7	23748.6	22681.1	21783.4	30292.6	37490.5
154	acceptor	33068.3	32908.6	37093	31936.7	36124.2	36405.1	34305.9	32123.7	36397.1	41441.6	23938.4	36011.2	49600.2	36896.2	38280.7	38611.2	32932	28389.6	34754.9	34728.6	28157	47979.2	24636.3	38414.7	36536	28175.6	22875.8	35302.6	29520.3	46461.2	41328.9	43695.3	34563.6	35560.5	32404.6	45036.1	34839.8	34843	37753.9	39104.2	29744.2	31739.3	30161.8	48017.7	50454.8	41699.4	31520.1	34175.4
154	fret	0.476295	0.538553	0.544512	0.544512	0.541534	0.756193	0.528596	0.498531	0.506577	0.487433	0.38155	0.616091	0.824742	0.544512	0.536564	0.482375	0.486422	0.561332	0.568231	0.504567	0.45594	0.63252	0.434424	0.533579	0.550459	0.465116	0.334134	0.517606	0.437507	0.751566	0.568231	0.603476	0.496516	0.4945	0.474265	0.628663	0.589812	0.56429	0.646943	0.551449	0.47528	0.537559	0.500544	0.668925	0.689801	0.65652	0.509589	0.477309
155	donor	61104.1	68038.5	66601.3	38241	62098.2	41109.3	65014.4	46935.9	46061.6	67918.7	60798.7	62846.7	44055.6	50379.1	39043.4	35240.9	38905.7	34366.6	50397.1	44917.9	33815.6	16000.6	40360.8	39546.4	24204.5	30306.5	35234.9	42923.8	23731.4	25018.9	40977.6	43875.9	36157.1	48995.9	49600.7	56726.7	39378.7	34678	23557.8	37199	30953.3	46882	38456.5	44636.4	55187.7	73541.7	58014.2	52517
155	acceptor	9868.29	11109	4299.68	9544.27	9221.78	10751.1	4739.77	9346.05	10617.7	18618.4	14076.1	15852.8	26827	21002.7	20154.9	24156.1	30961	20769.7	20005.2	13107.7	28615	18195.1	19020.6	12849.7	36806.2	22873.3	29726	33617.4	35597.2	30936.9	34842.4	24560.1	25170.9	23098.7	33272.9	40728.3	14674.9	28421.3	21245.1	24743	36424.2	32371	8872.68	3871.54	4768.97	-6068.75	-165.454	5524.28
155	fret	0.13875	0.140336	0.0603613	0.199592	0.12927	0.207086	0.0678355	0.165981	0.187195	0.215462	0.188018	0.201253	0.378675	0.294195	0.340392	0.406396	0.443554	0.376784	0.284431	0.225585	0.45849	0.532386	0.320274	0.245203	0.603507	0.429752	0.457489	0.439597	0.6002	0.552517	0.459491	0.358936	0.410262	0.320274	0.401578	0.418026	0.27122	0.450505	0.474592	0.399655	0.540829
156	donor	53362.5	63713.3	57144.1	75828.5	61490.2	61031.5	64395.5	70288.4	66077.5	51557	61381.4	71041.2	77101.7	37248.2	73267.2	53468.4	58170.3	51795.2	50736.6	64804.3	69318	58243.9	53612.5	74631.7	67086.2	52933.2	73143.7	53883	56403.1	53112.6	58514.4	57035.3	72346.8	59167.2	57929.2	63248.7	61575.5	74199.4	65959.9	52636.2	61163.8	61643.2	69038.7	72817.3	75108	65548.2	39215.4	70494.3
156	acceptor	73404.1	65526.8	46206.2	52880.5	61950.1	51394.8	46702.9	48180.3	49746.6	65802.4	64934.6	55720.8	58807.4	81677.4	54305.5	90253.4	70249	74957.7	87556.6	67087.6	55438.5	63502	56976.1	61263.1	57051.2	78030.3	72518.4	69811.8	69355.1	63065.1	67667.7	56467.8	54013	60576	73474.4	54111.8	62274.4	47571.6	59812	67525.5	52265.8	57245.1	77520.7	55256.7	51657.6	53791.4	78785.8	42615.8
156	fret	0.578875	0.507297	0.44691	0.410351	0.502291	0.457022	0.420531	0.406274	0.429681	0.56107	0.514298	0.439821	0.432722	0.686404	0.425614	0.628022	0.547181	0.591702	0.632912	0.508298	0.443873	0.52129	0.515298	0.450957	0.460052	0.595641	0.498282	0.564042	0.551153	0.543206	0.536242	0.49728	0.427646	0.506296	0.559088	0.461061	0.503292	0.390956	0.475175	0.562061	0.461061	0.481213	0.52927	0.431711	0.407293	0.450957	0.667986	0.37662
157	donor	71708.5	70777.4	91803.3	69592.3	74314.5	47634.7	67252.2	69770.9	75818.7	79764.1	70088	56801.3	67482	67866.1	56331.9	59845.9	72921.2	70302.1	69492.5	63481.4	72724.2	68825.4	60823.6	73076.1	76706.4	71233.8	136311	138766	126749	153393	183206	145939	137929	141802	146815	142636	155362	142004	150603	94314.1	39975	1022.96	2395.22	183.84	-1868.65	-2661.15	422.182	-1428.08
157	acceptor	67196	56858	54151	64121.9	61054.7	79505.1	61993	85706	77857	58007.7	75745.9	81125.8	76277.2	78041.6	77537.5	80624.5	86888	91161.3	76147.1	69965.2	86534.5	63801.1	75467.8	80337	85224	76390.2	-2044.5	-3212.41	3766.66	-5781.79	702.83	-9003.1	-3411.48	1038.91	268.987	1589.4	-5109.82	5733.08	-3852.16	-1034.11	-2016.55	799.715	-2120.03	967.267	581.576	4883.36	-1683.06	3932.48
157	fret	0.4835	0.4459	0.371481	0.479455	0.451	0.62496	0.479455	0.551526	0.506666	0.421271	0.519688	0.587959	0.530667	0.53465	0.579134	0.574221	0.543595	0.564373	0.522686	0.524683	0.543595	0.481478	0.553506	0.523684	0.526679	0.517688
158	donor	26406.9	21506.7	27339.6	185822	116643	126553	112242	198592	175588	215533	180804	182181	179126	202549	186119	207413	189855	174992	162836	152969	172379	175438	160785	183076	181037	150513	162030	146614	179236	183629	184440	174683	165995	176036	181548	209034	167844	174912	167774	157485	172124	223183	177762	162755	154277	217253	173556	168506
158	acceptor	150332	151686	140925	7765.78	-1538.81	1239.57	-3766.66	-745.206	-6436.35	-1885.06	-4780.3	-3699.43	2005.17	309.424	-5103.64	-6110.23	-8031.38	-3740.46	-569.446	-5101.48	-1062.71	-5895.53	-3508.72	-5549.8	-3671.07	-2923.2	-4066.43	-3845.35	-89.87	-4268.85	-2845.14	-4169.99	-7773.05	-2853.29	-2194.41	-2171.64	-2826.03	-4044.64	774.873	-2138.34	-4067.09	-6562.27	-5663.92	703.37	983.533	-1800.25	2695.55	-121.423
158	fret	0.850307	0.87577	0.837089
159	donor	44366.9	51321.6	59476.7	37378.2	23550.9	54590.1	65336.4	55936.9	69600	59319.2	52861.6	63059.7	54322.1	69146	58415.9	71416.3	62858.2	55608.7	80604.6	64339	40954.6	51462.1	49639.4	66987	57411.9	70736.4	54149.9	60560.3	66943.9	63035.3	50657.9	68679.7	44735.7	65563.9	59085.2	63893.9	63184.7	41026.1	54207.6	48465.6	60350.7	62017.5	60666.7	46818.3	53809.5	68687.9	43932.4	55793.9
159	acceptor	63754.6	61524.7	51102.8	66694.2	75001.9	72162.8	46659	65687	54117.8	50065.1	57948.1	57407.7	60917.3	50307.2	46716.5	52703.1	58195.9	62757.8	52496.8	53739.3	68042.4	66477.9	62092.6	56501.8	56277.4	57701.5	61151.7	58286.7	46525.6	50761.6	66843.2	53701.9	73091.5	54757	66505.9	48278.7	60335.3	72730.6	68735.2	60091.8	60331.8	50647	55972.4	63760.1	60805.5	51438.8	66068	55892.7
159	fret	0.589252	0.544964	0.462362	0.641143	0.760834	0.56909	0.417026	0.539759	0.437585	0.45738	0.523199	0.476382	0.528359	0.420924	0.444489	0.424831	0.480407	0.530427	0.394768	0.455391	0.624778	0.563819	0.555416	0.45738	0.494563	0.449437	0.530427	0.490508	0.410223	0.446467	0.56909	0.43857	0.620437	0.455391	0.529392	0.430707	0.488483	0.638935	0.558563	0.553321	0.499632	0.449437	0.4794	0.576493	0.530427	0.427766	0.601021	0.50065
160	donor	37386.4	21449	15015.4	23137.1	19243.1	70080.3	61621.5	65976.2	80171.8	75418.3	79554.8	75760.1	64229.5	62811.5	76421.1	73575.4	78765.3	72124.9	72738.7	62611.3	51267.8	62621.1	59498.7	60721.3	72908	53462.3	50509.2	57582.6	27496.7	68789.3	96394.2	81008.6	59458	53667.4	55197.7	66949.7	70705.4	69966.3	62339.4	66451.6	75610.3	74348.7	66474.4	63716.7	58160.5	64377.6	72079.4	63153.4
160	acceptor	32004.2	38331.7	51906.1	37191.4	33082.7	2484.59	6954.89	38.938	4102.49	-4187.04	1958.15	2509.11	594.413	-6110.48	841.598	-1434.26	-2400.04	2386.8	504.997	-3439.24	-2377.19	-8832.9	-3753.67	-8414.01	-6097.8	-7371.6	-6069.85	-527.567	3290.36	541.621	-6092.98	1796.44	-7663.21	2259.6	-1725.79	-3941.02	-2973.66	-1906.95	-2574.11	-5012.91	-3844.75	-863.743	-5569.06	-2204.95	-5416.64	-2017.25	-3688.92	-328.077
160	fret	0.461289	0.641625	0.775803	0.616366
161	donor	53609.5	53961.9	56649	55810.6	50880.3	51084.9	59165.9	48777	54306.6	53934.8	74951.9	60111.8	55398.3	63273.4	71119.2	72661.4	65520.4	65357.5	69494.9	61344	66958.5	67760.4	73027.7	75329	73169	64755.4	72600.5	65998	61647	55736.8	57687.7	68279.1	60475.3	65686.6	62756.1	64729.6	70917.1	56837.9	84365.6	76995	68890.3	51921.9	1312.69	-1654.07	16.4703	-1009.44	-722.089	-1930.29
161	acceptor	-6245.95	-5569.17	2754.28	8259.11	-4224.33	5249.81	12813.3	14933.1	9858.69	10978.4	6652.07	10425.2	7962.54	8220.67	5525.45	9256.23	5564.44	1543.14	-6753.88	-2905.17	-8749.24	-5179.44	-5054.76	-4293.25	-3476.54	-3649.64	-4890.35	-3706.78	-4383.81	-6785.98	-8387.26	-5944.66	-5035.29	-4903.52	-5000.63	-2491.65	-7816.09	-6968.61	-6156.31	-7946.45	-9039.27	-938.508	1239.6	2287.27	-979.925	1369.55	2778.5	2011.26
161	fret	-0.132675	-0.114425	0.045594	0.129021	-0.0910717	0.0926479	0.178722	0.23461	0.154133	0.168659	0.0818347	0.148272	0.126032
162	donor	118334	128455	116669	123756	124294	126127	117855	128637	119940	-3656.26	-764.601	-1191.96	-3738.13	-3963.8	-2643.78	-1453.57	4755.11	-4986.26	-4175.48	-3035.19	-6006.73	-900.397	-1243.88	-9365.68	-7432.58	3407.13	-6927.34	-4231.39	-9791.04	-6020.71	-2597.85	-4263.35	-2571.89	1002.74	-980.277	-2517.97	-984.271	6989.75	-2981.27	-3131.05	-7620.3	-3792.05	-325.261	-3738.13	-1441.58	3566.89	-1197.95	-6122.55
162	acceptor	9294.77	5681.01	3998.15	6378.72	8299.89	3137.63	8095.57	3239.64	9092.49	-3745.14	1717.5	1084.48	-313.27	-1191.36	-1729.63	-1020.35	1872.02	1143.48	1192.06	-1173.91	5779.25	-1003.74	925.3	407.99	1510.23	-2343.73	676.52	-1746.98	-3129.1	-3966.26	-2970.24	-325.86	2959.85	-1098.45	1615.06	-1538.04	-2862.8	-1207.31	-1759.8	1120.45	205.81	-2337.38	1409.1	-1305.27	-95.77	1861.67	-775.31	1523.31
162	fret	0.073063	0.0422702	0.0331059	0.0488374	0.0627875
163	donor	17353.1	19480.8	18940.9	18180.3	18998.6	16308.2	19334.9	20145	18992	18566.2	18872	23098.4	19715.5	17550.1	21328.5	36187.8	63399.8	52175.1	53902.8	49538	61502.5	53477	46794.9	60470.1	54516.8	58562.5	54638.2	54593	54619.7	52501.7	51921.8	50306.7	49733.5	55926.1	52763.1	50888	58084.1	50599.2	54721.2	58748.3	56467.4	54181.3	51911.5	58246.2	53944.3	57649.3	57408.7	52902.3
163	acceptor	29344.5	28384.9	34457.1	38566.8	39107.2	36104.9	32029.1	30557.9	35418.9	41167.3	30864.3	33859	36672.2	28910.3	27347.2	4494.38	-5754.65	-2298.35	-4955.99	-611.877	-1218.48	1540.4	2627.98	-4958.93	-4926.27	-10358.2	-1721.22	-6500.06	-2314.36	-4360.52	8925.83	360.672	-3931.64	-1971.68	-209.03	325.663	87.461	5278.29	-4681.18	-1026.88	-3711.18	-8715.46	-3916.62	-4646.33	2428.47	-874.006	-2855.83	-5501.51
163	fret	0.628395	0.593142	0.645216	0.680039	0.672784	0.689052	0.623685	0.602761	0.650798	0.689052	0.620851	0.594107	0.650798	0.621796
164	donor	47284.1	18177.3	-3736.51	-4038.15	-2925.86	-1406.06	-810.029	6614.95	7125.42	-6468.67	-865.136	3354.92	3950.95	5543.26	4706.5	-305.362	4053.91	-5598.56	-1491.62	-4014.95	-6866.03	-1288.59	6403.22	14976.7	17723.4	14480.8	6104.48	32938.8	43332.3	52478.7	54321.9	43114.8	58059	45577.2	58479.6	53795.5	75297.4	71635.7	98905.1	87466	127156	137664	93184.1	83959.4	88539.1	98122	115972	108056
164	acceptor	52821.3	72121.5	100054	99582.3	93017.1	123834	112985	89202.8	99874.6	118712	96000.3	85573.1	93646	82103.1	83410	83620.1	112125	119576	119984	103265	121200	119751	114978	101662	96945.8	112916	88777.7	50904.8	57093.6	28840.2	40182.9	36215.7	32510.7	37868.6	46151.6	33744.4	36319.9	-5481.08	4718.37	-867.958	-5603.62	-762.941	2744.85	-7193.79	-2214.59	-4892.21	-3275.84	1300.79
164	fret	0.527435	0.798516	1.03896	1.04258	1.03242	1.01116	1.00743	0.930594	0.933714	1.05769	1.00891	0.962269	0.959208	0.936828	0.946902	1.00375	0.965323	1.04908	1.01264	1.04041	1.05984	1.01116	0.946902	0.871676	0.845472	0.88622	0.93605	0.606972	0.568166	0.354112	0.424883	0.456607	0.35855	0.453461	0.440817	0.384946
165	donor	72265.1	43027.9	57848.2	72822.5	60395.3	56765.2	57219.1	30992.1	39310.2	72123.1	63681.6	105248	80139.8	64018.7	86173.6	88054.3	77734.8	40970.6	35925.6	53892.9	43755.2	72230.6	43755.2	61401.3	52113.1	59131.7	32766.7	55962.2	59147.6	53466.9	45793.9	30040.5	41152.4	71115.7	42132	56483.8	38285.5	57187.2	47017.7	46821.2	62035.8	41343.6	59963.9	68185	32091.1	41567.9	89517	99407.9
165	acceptor	25671.5	30460.4	26708.5	14623.1	33676	36949.5	35239.8	26758.7	34186	24486.4	29145.5	14148.7	17694.7	28264.8	27501.7	14337.1	29488.3	40231.3	39483	32004.4	36423.1	35789.7	36353	38645.9	24815.8	28585.7	33399.5	30210.3	25115.4	34228.6	38447.1	41292.7	22097.5	29380	58687.9	33663.6	30815	19637.2	34301.4	28157.6	30248.1	39638.9	22907	30961.7	38854.7	40133.8	42810.3	32543.1
165	fret	0.262154	0.414218	0.316248	0.167326	0.357716	0.394363	0.381475	0.462996	0.464991	0.253325	0.314277	0.118731	0.180968	0.306395	0.241562	0.140089	0.274917	0.494955	0.523989	0.37256	0.454022	0.331042	0.454022	0.38643	0.322163	0.326109	0.504959	0.350795	0.298518	0.390396	0.456016	0.579239	0.349807	0.292614	0.58226	0.37355	0.446051	0.255286	0.422169	0.375531	0.328082	0.489956	0.276882	0.312306	0.548068	0.490956	0.32315	0.246462
166	donor	57002	61565.9	74381.4	66336.7	56458.4	77740.4	66515.2	45553.6	90065.1	50701.8	39050.6	59529.4	44012.1	25009.9	54701.8	48150	49736.2	67026.4	54531.4	87748.6	33435.9	42766.6	37894.4	37334.5	33164.1	32912.6	50742.3	68949.3	59805.3	63894.5	75963.6	65955.4	55253.5	53691.6	48283.9	34673.3	54097.3	28981.5	63565.9	74162.3	46718	50543.5	36279.8	65217	46770.7	49087.1	50941.1	51180.5
166	acceptor	47356.5	33842.1	37486.5	30124.5	55669.4	38643.1	37753.6	57130.3	9481.23	48089.8	41645.4	29188.1	53891.5	84978	58634.9	50189.1	37005.4	44698.4	61061.1	16324.9	59618.7	53372.5	47605.5	65730.3	56642.9	72847.9	55928.6	38871.5	38046.7	36309.2	41861.9	40848.8	44116.6	55851.6	52931.5	54358.1	48387.1	59409.7	33887.2	32916.5	49075.6	54294.1	49073.4	37837.1	49799.7	40596.6	55528.3	34733.8
166	fret	0.453951	0.354686	0.335536	0.312307	0.496165	0.331928	0.362074	0.556487	0.0950846	0.486764	0.516272	0.329231	0.550969	0.773199	0.517341	0.509884	0.427046	0.399813	0.52808	0.157151	0.640188	0.555381	0.556487	0.637813	0.630718	0.688692	0.523772	0.360222	0.38835	0.362074	0.355607	0.382664	0.443922	0.509884	0.522698	0.610844	0.472298	0.672713	0.347349	0.30702	0.512009	0.51841	0.575448	0.366719	0.515205	0.452942	0.521624	0.404625
167	donor	61208.8	64730.6	61904.4	63977.9	75403.7	62257.3	59982.2	48916	56403.2	72080.1	62492.5	75975	53072.9	58587.6	73024.4	55966.4	55287.5	73985.6	79167.5	91651.9	63900.6	82158.4	74963.5	70930.8	81798.8	76637	75759.9	64488.7	66713.4	57525.6	78105.6	69586.6	57508.8	77850.2	75554.9	63084	63833.4	71488.7	60193.9	81741.7	81614	63880.4	54296.2	53130.1	27032.1	30409.5	32140.2	27257.3
167	acceptor	28248.7	22913.9	11978.9	12303.1	14069.9	20131.7	25679.2	23021.4	12609	21131.7	21725.8	16010	12859.1	14823.6	23406.4	22700.1	9923.16	16764.2	15762.6	12086.2	11576.4	10822.6	20733.8	10345.6	11549.6	9942.26	4062.9	24714.2	7191.02	8540.03	8465.11	21556.5	2812.7	30147.2	14039.1	6652.49	21613.7	20983.9	22302.2	18717.5	14736.7	23256.1	16801	27921.7	39602	37093.4	25557.6	24099.6
167	fret	0.315642	0.261878	0.16174	0.16174	0.157068	0.244727	0.30022	0.320471	0.182352	0.226687	0.258064	0.173909	0.194574	0.20211	0.242825	0.288686	0.1524	0.185169	0.166416	0.11615	0.153333	0.11615	0.216274	0.127275	0.123564	0.115224	0.0508625	0.27718	0.0976677	0.12913	0.0976677	0.236173	0.0462982	0.279096	0.157068	0.0958235	0.253296	0.226687	0.270481	0.186109	0.153333	0.266657	0.236173	0.344691	0.594754	0.549989	0.442794	0.469624
168	donor	13499.4	38169	18874.6	16989.1	25729	26714.5	24143.5	20251.7	23043.5	26685.3	29870.8	21662.2	28512.4	25647.8	21976.8	19739.2	25383.2	36046	28624.9	25195.7	18485	26870.7	29643.7	18178.7	24333.1	25116.5	22478.9	26474.9	24651.9	31789.6	19762.1	33016.8	21026.8	19268.4	27166.6	25010.2	33227.2	28024.9	28922.9	27874.9	24308.1	28172.8	31783.4	20085.1	26374.9	23312.3	25539.4	14564
168	acceptor	34462.9	21530.2	31480	51330.2	22902.7	37832.1	36449.7	30811.9	32168.8	20615.5	28116.2	35289.6	35019.2	33340.7	43007.2	33287.9	28835.9	25064.4	29453.3	31552.2	42418.1	32176.7	42081.9	35342.6	52380.7	30654.7	34512.6	30046.6	30891	29552.7	43114.1	18781.1	38471.3	34051	28396.6	32283.9	21977.9	33057.6	26874.7	32671.1	40490.2	30983.8	25271.2	37519.5	24512.2	22870.7	28481.2	43849.7
168	fret	0.718328	0.360354	0.625568	0.751477	0.470893	0.586136	0.601624	0.603551	0.582244	0.435442	0.485302	0.619849	0.550811	0.565611	0.661376	0.627486	0.531895	0.410033	0.506715	0.555757	0.696494	0.544858	0.587108	0.660442	0.682713	0.54982	0.605476	0.531895	0.555757	0.482224	0.685478	0.36254	0.646384	0.638842	0.510766	0.563644	0.398259	0.540879	0.481196	0.539883	0.624616	0.523874	0.442794	0.651082	0.481196	0.495529	0.526886	0.750608
169	donor	29429.9	16728.6	23112.5	18954.6	27083.2	27658.9	9830.2	3941.54	13363.4	19917	17932.6	23704	13078.1	32352.3	23781	32347.1	6636.5	12266.2	13212.9	16151.1	30763.4	14863.1	14457.1	7546.48	16963.1	12019.4	17934.3	16599.1	18562.6	22290	8605.22	17946.6	20505	13001.1	17873.1	18401.6	12957.4	26194.2	17442.6	20830.5	23306.7	12082.4	24545.7	21056.3	30352.1	17643.8	7259.49	16081.1
169	acceptor	33424.7	41422.3	54585.1	52262.5	51630.4	39288.1	51563.4	74849	64681.4	68391.3	43557.3	46459.2	69026.8	43587	50403.2	46983.6	52179.5	61016	70919.1	46347.3	35703.8	51471.8	65446.7	48950.8	68201	44272.6	47516.7	58682.7	47596.4	53406.6	62465.3	49130.1	62140.3	63889.1	58524.4	69176.8	55493.3	44526.2	52142.7	43361.3	48143.2	59322.5	55995.6	57241.9	41984.2	56648.6	60030	56710.9
169	fret	0.532264	0.712699	0.70273	0.733884	0.655674	0.58735	0.840378	0.950533	0.828699	0.774549	0.708263	0.662184	0.840378	0.573715	0.679631	0.592616	0.887665	0.832197	0.842721	0.741737	0.537404	0.775688	0.819396	0.866273	0.800896	0.785969	0.726057	0.779092	0.719369	0.706048	0.879324	0.732764	0.751872	0.83103	0.766587	0.789405	0.810128	0.629816	0.749616	0.675257	0.674165	0.83103	0.695005	0.730527	0.579998	0.76205	0.892445	0.779092
170	donor	70894.5	50417.5	45403.4	45881.9	29948.9	31904.6	34988	39690.1	16208.8	25995.8	27052.8	32682.8	39036.8	27394	40801.1	36444.4	51986.3	31309.6	18039.7	35782.8	28167.9	21976.2	28338.5	22633.6	35970.1	42740.2	29849	27277.5	30227.7	39540.3	44825	34542.8	55918.6	34409.6	36223.9	35262.7	33752.2	32270.8	35383.3	27568.7	33211.2	36294.6	41129.9	21551.7	23873.6	50879.4	40048	35716.2
170	acceptor	90990.5	94107	97999.6	112440	118812	110046	95755.9	114676	81393.1	81995.4	79257.7	101126	89424.1	90671.2	83110.9	97835.1	81312.4	101471	103673	102525	94401.9	118335	98599.7	130540	122628	111459	110605	99315	105445	111480	109811	111065	100970	112348	100870	115966	116292	105696	114814	107188	118349	101502	126733	103902	105620	103989	102796	96723.1
170	fret	0.561782	0.650818	0.683307	0.710536	0.799088	0.775217	0.732195	0.743142	0.833656	0.759065	0.745586	0.755368	0.696268	0.767755	0.670458	0.728563	0.610051	0.764038	0.851886	0.740703	0.770238	0.842745	0.776464	0.851886	0.772726	0.72253	0.787735	0.783969	0.777712	0.738267	0.710536	0.762801	0.643948	0.765276	0.735835	0.766515	0.775217	0.766515	0.764038	0.795294	0.781463	0.737051	0.755368	0.828486	0.815636	0.671622	0.720124	0.729773
171	donor	30881.5	34806.9	29281.5	35478.6	18278.7	32910.2	25681.5	83897.7	134851	110556	79620.2	82785.7	68018.3	58512.1	76734	89499.6	95664.1	103511	82770.4	93530.2	87132.1	88500.5	88339.8	77086.2	86234.5	80012.5	88804.8	88469.9	85080.4	83114.9	78711.1	90286.2	87572.3	83564.7	81030.7	83828.8	81811.5	69124.5	87955.1	76456.5	91784.7	76278.5	77773.3	92341.7	79469	78202	85382.8	83960.8
171	acceptor	42584.6	34269.5	49037.8	58704.1	72800.6	48619.1	57696	15143.2	-5088.51	-7159.83	-15422.7	1037.74	-5090.16	-265.203	926.25	-3183.64	-2567.99	478.301	-4798.31	2194.89	5660.72	-2340.38	-4994.9	-2029.23	979.774	-1031.24	-14172.2	1583.66	-1243.36	396.015	-7607.5	-1565.26	-2477.61	-405.863	-4393.52	1385.55	-7364.57	-2552.39	-1748.26	-3679.79	-892.968	-1421.78	-411.842	-11845.3	-1108.35	-2579.84	-6118.69	-623.82
171	fret	0.57921	0.495807	0.626178	0.623349	0.798939	0.596653
172	donor	59693.7	56735.3	45384.4	52883	53224.6	58917.7	48777.2	61485.3	49855.9	55122.9	45425.2	55726.3	59522	62494.3	59078.3	62609.4	54224.3	58038.6	57296	57274.6	56263.7	53565.3	56574.7	64314.7	55647.4	51184.2	63061.5	54428.6	45349.1	55494.2	57689.6	54010.8	62830.4	60117.9	48869.1	56097.6	38938.5	25641.9	31416.7	37202.6	51112.8	43896.4	46425.9	52156.1	58130.5	50402.6	47380.2	45183.9
172	acceptor	13828.4	9400.88	18199.3	12147.6	15680.2	14825.1	17110.6	11987.4	18464.2	12122	17109.5	14027.6	16795.7	16537.9	15811	16000.6	19104	15793	21008.6	16266	11153.4	17002.3	14230.4	19045.4	12256.4	20120.6	10560.3	16843.5	17764.2	15208.6	10852.9	13599.6	12438.3	19559.5	26015.5	19523	32105.1	43134.9	36301.8	27846.1	19344.9	25869.6	26429.4	14150.8	19143.9	20878.2	34370.2	22079.4
172	fret	0.188171	0.142536	0.286555	0.187178	0.227894	0.201077	0.2597	0.163363	0.270639	0.180231	0.273623	0.201077	0.219947	0.209021	0.211007	0.203063	0.260694	0.213987	0.26865	0.22094	0.165347	0.240812	0.201077	0.228888	0.180231	0.282575	0.143527	0.235843	0.28158	0.21498	0.158403	0.201077	0.165347	0.245782	0.347291	0.257712	0.452044	0.627215	0.536035	0.428077	0.274617	0.371211	0.363236	0.212994	0.24777	0.292525	0.420091	0.328364
173	donor	322137	236504	209986	137145	212156	220401	255708	213019	267374	241759	205091	252695	277124	252139	299676	285223	271968	248080	242538	219949	249285	227380	257168	211103	192096	193222	235904	324350	338070	335534	333173	304724	309967	335355	262210	322191	282617	347820	314650	330005	399418	407777	423382	401700	395725	404693	403453	354031
173	acceptor	98452.5	73828	96647.9	115672	90784	92179.2	89339.6	69766.9	71014.6	58579.9	66845.5	72213.2	56109	68583.5	71975	66807.7	65488.1	63895.7	72666.1	87565	60752.7	64377.6	85491.4	98704.7	104168	90370.5	57815.1	8624.67	6129.29	11188.2	13697.5	11018.6	23594.9	11926.9	32063.1	72522.7	31191.6	6655.02	26663	23062.3	2278.93	7042.46	5953.99	5144.62	7067.61	-2205.07	-2261.13	7600.65
173	fret	0.234105	0.238081	0.315078	0.457265	0.299456	0.295166	0.259145	0.246934	0.209804	0.195261	0.246127	0.222256	0.168409	0.213675	0.193745	0.18996	0.193745	0.205183	0.230928	0.284958	0.19602	0.220689	0.249362	0.318588	0.351749	0.318588	0.196779	0.0256314	0.0177856	0.0323398	0.0397286	0.0347944	0.0707005	0.03418	0.109108	0.183963	0.0996598
174	donor	63783.6	67986.7	67636.4	71115.5	74527.5	71131.1	86731.2	69427.1	74003.9	82340.2	61797.3	69990.5	60827	71598.2	66074.4	75527	77414	75035.5	78450.4	86517.1	65912.9	84533.8	78755	80245	73987.4	128732	154122	160848	152205	137885	143261	148257	145515	145174	156812	122485	126948	124158	130155	128565	122578	133434	106117	143375	126732	127021	132882	120383
174	acceptor	55175.9	57784.3	58687	55781.1	55466.9	49219.7	53580.5	46357.5	48056.7	52321.3	58575.4	46489.5	43266.3	55947.8	55940.1	51598.2	43888.7	46197.8	40698.7	53521.2	59936.1	53889.4	55652.1	55918.9	53793.4	14334.4	1660.8	-30.342	-4707.33	1342	853.234	-1289.74	-1695.96	2202.32	-11126.5	3539.06	-2447.48	1387.17	-338.404	2852.46	-2626.48	2287.4	-3363.54	-1581.48	-870.129	1231.84	-2517	2647.76
174	fret	0.463782	0.459774	0.464783	0.439724	0.426682	0.408611	0.381475	0.400574	0.393539	0.388513	0.486811	0.399569	0.41564	0.438721	0.458772	0.405597	0.361352	0.381475	0.341211	0.382481	0.4758	0.389519	0.413633	0.410619	0.42066
175	donor	6103.18	3333.04	7579.6	8938.49	16661.3	28232.3	24254.9	23170.6	10924.5	1433.58	-1737.19	-647.504	-4557.54	-1928.41	-3502.04	-3287.31	-1584.42	-4030.86	-4649.41	-4194.31	-2192.29	-3236.03	-4275.5	-2459.37	-3326.84	39879.1	48272.8	53645.4	47535.7	41287.1	48262.1	52535.4	57768	55649.5	54500	55323.7	50293	51780.1	53875.1	57514.8	53884.7	52719.1	50582.5	49941.5	51181.8	52039.7	50916.9	67913.8
175	acceptor	54505.9	72968.6	51839.5	50286.6	42989.6	37014.3	34306.8	46933.3	51384.3	64875	50559.8	57785.1	61954	57919.3	44591	52949.5	65967.1	53918.1	56650	62653.5	55619.3	57361.9	58139.1	56609.1	47764.4	3131.32	-2653.14	-480.308	958.871	1072.19	-298.144	2402.17	-2916.4	-2413.37	1930.11	3100.47	-4329.92	8571.15	-3832.95	1157.68	800.49	-1735.59	1363.33	-3029.38	466.44	-1086.66	1394.32	-1239.83
175	fret	0.899572	0.956537	0.872591	0.848701	0.721103	0.567624	0.586205	0.669293	0.824489	0.978389	1.03549	1.01111	1.07954	1.03471	1.08488	1.06651	1.02452	1.08106	1.08944	1.07188	1.04096	1.05957	1.07954	1.04563
176	donor	34546.8	42840.9	85530	96526.4	100518	114003	82550.5	81633.8	68725.9	77241.4	72653.1	81964.3	82997.3	140152	201980	209892	190575	199985	177261	188058	183122	196013	205755	27910	8687.99	7642.27	2701.96	3431.5	6835.47	6005.59	1418.9	3805.03	1242.89	8629.85	8303.31	3773.97	4760.75	3910.95	-582.552	2022.6	4599.08	-621.577	3247.52	2087.11	6160.1	8433.13	4907.3	6029.48
176	acceptor	103248	98146.3	78972.4	69758.4	45962.5	41805	84427.5	88229.5	98404.2	105873	111089	123943	103137	47367.1	537.798	-1387.73	-499.435	1989.41	2018.11	-3479.52	7.688	-7379.71	1534.67	-1777.42	-912.605	-2117.79	1702.67	-1140.83	-2240.69	-211.786	3407.78	-4453.98	114.591	-3811.27	-3950.59	-3406.77	774.104	-3668.78	-2984.74	2576.95	-5109.4	-2929.18	-3773.4	-2515.87	-5195.1	-4645.39	1402.36	1762.95
176	fret	0.748721	0.696016	0.479936	0.419372	0.313947	0.268254	0.505438	0.519897	0.588767	0.577981	0.605078	0.601803	0.554499
177	donor	45561.1	56899.2	23741.3	61365.2	53871.8	54427.6	56203.7	60665.3	24980	45863.9	51873	45886.7	52519.9	55981.7	57921	55938.3	51220.9	42897.6	53782.9	56569.1	35590.3	42224.3	68681.3	52580.9	58466.5	60660.2	51598.8	47972.3	46922.5	51457.6	49114.7	63272.8	46637.3	46740.2	41444.3	53319	45886	56239	47329.8	27830.9	45774.3	55259.8	56689.6	4864.32	2134	65.3059	-1466	-1035.2
177	acceptor	45912	59937.3	94377.8	54124.5	53694.8	58439	42231.1	51076.4	75251.3	58511.2	54158.3	71064.2	51158.3	49891.7	44992.9	53836.2	50349.5	67990.1	44436.1	55164.5	67192.7	68327.5	52255.1	64270	46506.8	55584.4	52538	56709.4	60181	47444	58192	27514.4	54975.4	59999.7	67898.5	61227.5	59847.4	63722.6	60887.2	83126	58816.7	56711.1	42621.5	3934.72	3540.91	7042.3	3044.46	-3287.79
177	fret	0.502291	0.513299	0.799367	0.469131	0.499285	0.517296	0.428662	0.457022	0.750842	0.56107	0.510299	0.607436	0.493267	0.471146	0.43678	0.490256	0.495274	0.613326	0.451969	0.493267	0.6534	0.618229	0.431711	0.55016	0.44286	0.478195	0.504294	0.542212	0.562061	0.480207	0.542212	0.303332	0.541217	0.562061	0.621169	0.534251	0.566022	0.531263	0.563051	0.74893	0.562061	0.506296	0.429681
178	donor	80108.4	76089.9	81390.1	85496.5	70640.5	80201.6	79386.2	93370.8	78549.5	83657.8	76710.8	92011.8	91031.2	85576.4	74523.1	80835.9	74722.9	70515.3	85821.6	90676.8	94196.9	83076.9	85040.8	93051.1	88590.3	87625.6	81243.6	90439.6	91537.5	77806	86586.4	95412	86852.9	85603.1	75263.9	98958.8	78632.1	95574.6	70659.2	81395.4	71679.8	76058	87380.5	81232.9	83980.3	86351.9	77099.9	97461.2
178	acceptor	13487.5	6584.42	10187.7	6590.61	8787.71	11317.4	3574.34	15525	10114.1	14896.9	21105.2	10519.2	14413.8	9357.18	7306	14419.9	18370.7	11779	15713.2	11408.1	13457.3	8752.76	12208.8	16224.2	17066.1	9323.79	18291	14339.2	12425.2	11106	13523.6	10405.6	18501.6	14358.5	17653.6	13352.4	15876.8	9773.12	10890.6	13100.8	7064.09	13343.4	11953.8	11638.7	13078.2	11153.3	17700.5	10198.3
178	fret	0.144386	0.0793682	0.111412	0.0713157	0.110656	0.12357	0.0432268	0.142831	0.114439	0.151409	0.21577	0.102374	0.136632	0.0986344	0.0889601	0.151409	0.197716	0.142831	0.154544	0.111412	0.125095	0.0956488	0.12586	0.148282	0.161629	0.0963945	0.183952	0.136632	0.119757	0.125095	0.135088	0.0986344	0.175931	0.143608	0.1896	0.118996	0.167964	0.0926711	0.133545	0.138953	0.0897013	0.149058	0.120519	0.125095	0.135088	0.114439	0.186369	0.0949037
179	donor	62887.9	44375	85609.4	57177.3	72597.8	58288.7	49429.9	65106.1	70644.6	59135.1	56763.4	63994.7	62976.2	52038.7	60413.9	83577.2	68849.6	71779.3	56089.1	69277.4	67570.8	67305.7	55903.1	75188	65068.9	68449.7	70258.6	67435.9	58772.3	63018.1	58107.4	67812.6	73244.2	55052.1	70198.2	54698.7	57651.6	63218.1	69063.5	61734.6	73913.8	83447	95309.9	68672.9	52150.3	87195.1	82521.5	72249
179	acceptor	18298.2	17430.8	13294.1	14116.6	7691.95	17150	14164.9	17068.7	12039	12612.8	15732.3	10054.1	25771.8	24430	15068.9	9023.79	23187.8	22296.4	12138	20823	22064.3	12113.8	8882.77	24135.4	10209.9	14139.4	12093.3	16103.4	18007.4	11821.9	20423.1	14588	16307.8	29545.5	22871.6	19785.1	24733	17026	22093.1	18351.3	7796.66	2314.16	3324.37	8448.94	6611.05	-3253.12	3339.45	2173.12
179	fret	0.225053	0.282167	0.134087	0.197896	0.095585	0.227423	0.22269	0.207879	0.145445	0.176058	0.217202	0.135498	0.290648	0.31924	0.199424	0.0975997	0.252312	0.236959	0.177546	0.231388	0.245818	0.152628	0.136911	0.243396	0.135498	0.170874	0.146877	0.192571	0.234573	0.157695	0.259678	0.176802	0.182024	0.348794	0.245818	0.265452	0.300075	0.212527
180	donor	12891	17490.4	8789.74	10987.2	12109	15613	7978.07	18816.8	2847.43	7898.89	9489.22	7737.21	21139.6	8337.71	10337.2	9400.14	15840.7	7027.83	8195.84	1864.19	7021.23	9218.67	5595.87	-1243.89	4830.4	16299.3	7987.97	362.939	7760.31	12445.5	8703.95	7535.95	12627	21875.4	6496.62	-682.986	2735.25	23663.7	12349.8	6334.95	10089.7	4111.12	21601.5	12537.9	5519.98	17886.3	11076.3	3183.97
180	acceptor	68785.9	63663.8	83031.7	84578.4	65239.5	77254.5	84438	67143.2	78364.1	78125.7	62840.5	81555.6	80473.9	66132	78555.7	80615.5	82278.8	82075.1	67809.7	78429	76064.3	88901	81104.4	82295.8	71645.3	73239.6	83235.4	93873.2	89131	88196.8	87258.8	88691.7	83593.3	74987.9	69675.7	83928.7	77965.7	78894	79741.5	84053.5	69067.1	74659.5	62102.1	67081.7	84743.2	63878.7	82224.7	71121.1
180	fret	0.842293	0.784146	0.903982	0.885115	0.843335	0.831881	0.913431	0.781042	0.965057	0.90818	0.868379	0.913431	0.792429	0.888257	0.884068	0.895592	0.838127	0.920787	0.892447	0.976689	0.915532	0.906081	0.935519	1.01487	0.936572	0.818364	0.912381	0.995757	0.919736	0.876743	0.90923	0.921839	0.868379	0.773804	0.914482	1.00849	0.966114	0.769671	0.866289	0.930255	0.87256	0.948166	0.741823	0.842293	0.938679	0.781042	0.880928	0.957663
181	donor	58953.8	55931.1	56224.4	53769.4	62666.2	55898	55299.8	56672.8	45323.5	60428.3	62513.8	62502.3	59770.4	62377.9	49297.5	54391.8	68993.6	61491.4	53985.3	53383.3	50389.8	53422.7	64982.8	66877.7	57779	65132.6	79070.2	54455.3	66205.8	59905.1	57580.9	55130.9	59355.1	54069.2	60494.4	52731.8	63120.9	65779.1	58369.6	51687.8	61303.4	72937.1	71396.6	56276.5	63486.6	51094.7	56559.7	46965.7
181	acceptor	27526.1	43400	33751.3	28868.1	46624.8	35585.7	37259	34735	35183.3	35099.7	36273	25640.7	30019.8	44056.9	41986.2	40032.4	29179.3	33652.2	23863.1	41965.3	32885.1	45414.5	27772.9	41066.1	37760.5	35885.2	39004.4	59395.1	36451.4	32760.1	40370.7	44044.5	36769.3	28845.8	30193.8	39116.7	37754.1	43136.3	29675	29127.7	37955.9	28755	30270	25438.2	48446.2	53236.8	41867.3	48567.3
181	fret	0.318302	0.436653	0.374669	0.349091	0.426838	0.389021	0.402512	0.380397	0.436653	0.367058	0.367058	0.290721	0.334106	0.414151	0.46041	0.423903	0.297127	0.353809	0.306305	0.440592	0.394792	0.459414	0.299875	0.380397	0.394792	0.355697	0.330376	0.5221	0.354753	0.353809	0.412206	0.44454	0.38231	0.348151	0.333173	0.425859	0.374669	0.395755	0.336909	0.360422	0.38231	0.282533	0.298042	0.31091	0.432721	0.5098	0.42488	0.50878
182	donor	63580.4	57335.7	55254.7	41135.2	62244.2	62201.6	56214.1	58112.7	66174	51331.4	51479.2	67873.3	66848.1	85740.2	53638.9	57671.6	56195.6	55992.3	58443.7	59956.7	58257.3	56348.3	59890	68358.6	80213.1	57145.3	58152.1	52640.2	58622.1	69120.3	43533.6	48503.9	82319.8	124134	125005	118059	108387	128766	120134	130960	117555	123653	113246	72464.4	7170.69	409.439	1338.26	8951.2
182	acceptor	52851.2	55347.7	50331.7	76613.3	46791.9	51972.4	58425.6	48416.9	44288.4	62978.2	55869.2	56289.2	49860.1	46795.7	59681.2	51880.9	58445.7	58186.7	58005.9	55720.1	63525.6	79548.6	59574.4	53622	44406	59679.4	55997.9	67135.1	70842.3	53012.9	62036.9	66466.2	35854.8	303.459	759.231	2765.39	1672.71	-3103.94	6375.57	2076.65	1648.04	2983.92	-861.718	3297.49	5590.59	5776.97	-1771.12	2756.83
182	fret	0.454348	0.491258	0.476273	0.650828	0.429506	0.455343	0.509276	0.454348	0.400786	0.550468	0.520308	0.453353	0.427522	0.353479	0.526331	0.47328	0.510278	0.509276	0.49826	0.481265	0.521311	0.585807	0.49826	0.439433	0.356427	0.511281	0.490258	0.560551	0.547446	0.434468	0.587831	0.577717
183	donor	40862.6	46947.3	35132.4	46765.6	41960.4	27524.8	34418.7	31576.9	30921.9	34410.7	36636.9	45560.9	37303.1	37475.9	42789.8	36130.6	35903.1	48490.3	44354.6	42770.6	35650	46022.2	39437.7	32221.5	45633.3	43649	50559.8	46696.5	41156	47583	47388.5	41894.5	43911	41779.6	40386.8	51839.3	35944.9	46409.6	45081.9	44111.9	37925.2	34648.6	22378	39964.9	37047.6	44014.7	39494.8	47767.8
183	acceptor	47712.7	45104	50343.7	50913	54447.6	50736.7	49540.2	58593.8	54821.1	44190	50384.5	47339.4	40675.9	55469.4	45486.6	51567.9	56596.2	47309.9	38451	43675.6	46317.4	50619.9	40508.3	66034.5	58039.1	49179.2	36558.2	43065.3	49576.8	41396.9	43537.9	36637.5	50280.3	53029.1	48879.9	42187.2	54254.1	50548.4	44923.8	37490.5	48639.5	49799.5	54013.2	45327.6	62422.7	47753.9	57841.9	54916.2
183	fret	0.538544	0.490232	0.589457	0.521376	0.564948	0.648219	0.590481	0.650295	0.638889	0.561894	0.579228	0.509294	0.521376	0.596631	0.515331	0.588433	0.612044	0.494238	0.464282	0.505274	0.564948	0.523393	0.506279	0.672145	0.559859	0.52945	0.419733	0.480233	0.546656	0.465277	0.479234	0.466273	0.533492	0.558842	0.54767	0.44839	0.601763	0.521376	0.499251	0.45931	0.561894	0.589457	0.706721	0.531471	0.627511	0.520368	0.59458	0.534497
184	donor	18254.1	17057.9	8157.15	10069.2	14637.9	67741.3	83751.4	103550	104449	98441.4	105930	114508	94154.1	95169	90232.2	95758.7	87668.5	105849	99015.2	97995.5	106633	96976.2	109798	100023	109747	109191	97975.6	107260	112843	102134	113247	95705.2	92381.8	100019	97311.1	73210.7	108462	101423	108157	106381	106975	101879	105223	99795.2	123289	104558	110009	117253
184	acceptor	105690	91613.2	96670.5	88486.1	74911.2	7911.95	-2226.07	-1925.3	-1431.88	1520.69	-4192.01	-2271.43	-3233.97	-3305.73	-2395.03	602.08	-1111.43	-762.219	-2676.25	-446.453	-4691.7	-430.363	-1285.9	320.3	2015.9	-1797.01	-9.464	-805.8	300.262	-5061.1	-2724.55	4683.44	570.376	-1968.9	-7013.64	-36.689	-864.198	-856.629	1532.05	1360.06	1188.63	-2607.61	-2830.26	-4824.74	8253.2	-3634.16	388.385	1686.41
184	fret	0.852421	0.842901	0.922082	0.897707	0.83682
185	donor	26262.7	31281.1	31239.7	28125.2	29417.3	38424.9	33315.8	26543.3	28956.6	30344.6	28686.5	30390.6	41745.1	34142.6	31636.7	30589.1	34513.2	34008.5	29672.3	31643.9	31919.9	31308.1	31261.4	32494.3	31302.1	29168.8	32264.9	29598.7	27736.1	28815.3	28002.3	32314.2	32015.2	31072.1	33812.7	29479.7	29622.3	29385.1	27586.3	27339.2	27452.9	28077.9	27230.8	35893.4	27813	28106.1	33208	35391.9
185	acceptor	61417.5	47713.5	64265.3	43500.4	64423	65862.7	52221	41508.5	42382.4	43991.4	43693.1	53598.1	55780.2	46103.8	49128.9	50136.9	50091.7	42087.9	38505.6	41465.9	45663.6	46066.6	48986.9	47063	46452.2	40773.5	42433.5	34493.8	45146.8	42226	46453.9	40319.1	44667.8	43337.7	52656.3	39146.5	33962.3	47924.4	39724	46478.4	46870	47196.8	37374.3	48781.3	45468.3	60689.8	43023	89122.2
185	fret	0.700446	0.604236	0.672539	0.607116	0.686594	0.631671	0.61094	0.609986	0.594566	0.591644	0.603274	0.638162	0.571904	0.574894	0.608073	0.621369	0.591644	0.552726	0.564887	0.566898	0.588711	0.595538	0.609986	0.591644	0.597479	0.582817	0.567901	0.538322	0.619483	0.594566	0.624192	0.554765	0.582817	0.582817	0.60903	0.570905	0.534163	0.619483	0.58969	0.629808	0.63074	0.627004	0.578864	0.575888	0.620427	0.683103	0.56388	0.715673
186	donor	50626.9	37916.7	49277.3	56103.8	40432.6	56029.5	50377.7	45936.6	57275.7	59212.7	46612.8	49150.3	42345.3	52739.5	48357.4	52456.3	42344.6	49850.8	46734.3	40865.2	36303.3	48478.2	50125.7	44861.2	42854.2	52938.1	48242.9	48820.5	50242.3	46716.3	41658.7	52530.6	43522	43330.4	43483.2	54155.8	44805	47217.5	52701.3	38026.4	46312.2	51500.3	57397.9	41494.1	50046.5	53308.1	44598.1	43227
186	acceptor	73530.1	71045.6	61190.7	55978.4	77115.4	56712.2	69277.1	71647.6	68892.2	61035.3	64908.2	68747.4	75967.3	69179	69222.3	76437	80001.1	60599.5	65296.2	72891.4	70674.8	75595.8	65717.9	65438.3	71985.9	65356.8	57689.5	67054.3	63840.6	65324.1	78565.8	60076.8	71155.5	73117.9	74340.1	75665.5	71237.2	75352.8	70294.1	87870.7	80551.7	56660.8	55011.3	70844.8	67232.5	58086.9	74436.5	71452.3
186	fret	0.592185	0.652054	0.554235	0.49926	0.656043	0.50326	0.579205	0.609155	0.546242	0.50726	0.582201	0.583199	0.64208	0.567221	0.58919	0.593184	0.654048	0.54824	0.583199	0.641083	0.661029	0.609155	0.567221	0.593184	0.627117	0.552237	0.544243	0.578206	0.55923	0.583199	0.653051	0.533251	0.620132	0.628114	0.631107	0.583199	0.614145	0.615143	0.571216	0.69791	0.635098	0.524255	0.489259	0.631107	0.573214	0.521257	0.625121	0.623125
187	donor	57072.9	63669.7	62573.4	62751.7	62517.3	56896.1	41230.6	59598.6	61021.9	25136.4	65136.3	55378.7	31135.4	55148.1	61808.7	50253.7	55589.6	68759.8	60175.2	56885.5	65006.6	65965.6	64397.3	53433.4	32599.7	68885.8	58186.7	37551.7	56572.2	64383.7	59729.8	36354.4	40756.4	61498.4	36677.7	13447.2	15635.2	35125.4	64936.8	60703.2	59776.9	46269.8	59958.2	52556.4	65695.5	69021.6	69902.4	58764
187	acceptor	63322.1	57797.1	50673.3	53461.2	57165.4	62384.9	73587.7	58134.5	58954.6	87719.8	53483.6	55563	73155.7	60661.1	59224.6	64648.3	77354.7	54245.5	54849.5	49914.4	48453.6	49630.2	50898.7	58591.8	73663.6	56661.3	51723.2	75747.8	52320.8	42826.4	53062.4	78331.7	75404.7	60600.9	81291	103022	103640	76114.8	68774.1	60905.9	57583.5	85276.4	60256.3	62462.3	62787.2	58880.3	61725	56455.3
187	fret	0.526173	0.476084	0.447216	0.46014	0.47808	0.523156	0.640862	0.49407	0.491069	0.777512	0.45119	0.501079	0.701579	0.524162	0.489069	0.562485	0.581735	0.441259	0.477082	0.467111	0.427384	0.429364	0.441259	0.523156	0.693312	0.45119	0.470101	0.668576	0.480077	0.399724	0.470101	0.682993	0.649061	0.496072	0.689183	0.884075	0.869198	0.684025	0.514115	0.501079	0.491069	0.648035	0.501079	0.54329	0.489069	0.46014	0.469104	0.490069
188	donor	38130.5	63584.7	64122.8	51143.1	59125.5	57949.5	61269.3	60647.2	52197.4	57534.4	67213.7	61005.1	68102.4	59871.7	56190.4	74161.3	70538.4	59519.9	51711.6	59303.2	67998.9	58141.8	64563.5	67827.3	71658.4	75280.1	59967.9	65147.8	75925.3	63588.4	64293.2	72895.2	78924.9	68020.9	65986.6	65796.7	71078.9	36017.2	51354.9	129266	135271	132530	24555.5	304.11	-495.709	1135.58	-457.97	-971.704
188	acceptor	87020.2	62689	62989.4	60241.3	62639.2	71256.7	79447.5	67578	74678.6	71205.6	62555.8	57100.9	65350.9	63930.3	57968.7	63398	59607.1	72938.3	67371.2	68353.2	74707.9	83901.2	80292.2	75120.9	55391.8	61100.2	62980.1	73747.3	60290.9	56752	55020.9	69278.1	55945.5	70204.7	76244.3	62541.7	69594.9	71720.2	58609.3	-6030.69	-3230.36	665.309	4278.93	-796.589	62.185	-3025.77	1565.01	-478.624
188	fret	0.69549	0.496756	0.495756	0.540745	0.514755	0.551738	0.564728	0.526751	0.588702	0.552737	0.481754	0.483754	0.489755	0.516754	0.507756	0.460745	0.457743	0.550739	0.565727	0.535748	0.523752	0.590699	0.554736	0.525752	0.435726	0.447736	0.511755	0.53075	0.442732	0.47175	0.460745	0.487755	0.414704	0.507756	0.535748	0.487755	0.494756	0.665565	0.532749
189	donor	85145.6	88569.4	103443	105234	90402.9	77066.8	127722	85774.3	120811	118803	121714	109297	138025	106539	123632	116737	112235	124123	96944.1	77838.2	67091.1	61638.3	74646.8	112774	87586.6	88384.5	113540	87951.2	81996.5	96706.3	90064.7	122787	72242.7	104812	104024	114814	86524.6	104125	97974.4	110180	129117	68491.3	85779.6	102835	85673.9	112922	105546	104368
189	acceptor	38717.4	25993.8	15431.8	10458.6	25409	25904.4	14303	16408.1	15809.9	20352.2	23865.8	22235.7	16089.4	28464.1	16584.8	21334.8	26985	8768.92	30024.6	29967.4	42186.5	45546	29877.7	27933.3	28508.2	30812.7	32251.4	36545.3	37850.2	32065	18684.4	17608.1	31478.5	24767.7	31050.7	36564.9	25659.6	32612.7	26606.4	22094	9544.48	35560.5	32505.8	37082.2	23247.4	16088.2	28522.2	25718.8
189	fret	0.312565	0.226709	0.12963	0.0905638	0.219153	0.25149	0.100402	0.160345	0.115473	0.146131	0.163777	0.1693	0.104134	0.210942	0.118022	0.154213	0.194104	0.066088	0.236664	0.27805	0.386186	0.424485	0.285479	0.198454	0.245207	0.25863	0.22141	0.293829	0.316026	0.249126	0.172085	0.125736	0.303133	0.191221	0.229756	0.24131	0.228992	0.238209	0.213903	0.167229	0.0690179	0.341647	0.274774	0.265041	0.213171	0.124443	0.212427	0.197727
190	donor	142173	140246	146909	143776	137069	137411	133357	130864	121490	104511	119236	159650	131742	137915	126735	136381	137626	151110	139555	95435.3	151378	161664	157724	154787	152433	143356	166343	143167	147777	138952	134052	138323	121418	116746	132933	117907	140250	115911	134362	153951	129180	123097	136683	126707	44414.9	134846	150361	126792
190	acceptor	22509.2	21533	23508.9	23908.8	28702.4	33433.1	36699.5	44062.5	24057.9	27212.3	35666.1	23287.2	27286	22328.7	29772.2	34207.1	31228.3	31310.5	22612.5	56196.3	48513.4	28079.2	26056.9	16515.1	16488.4	34735.1	54672.6	24906.3	25526.3	50339.3	23536.8	34113.8	38499.4	32516	32805.2	45134.8	31933.3	42655.5	33164.7	20225	36237.4	29571	32073	45156.5	62727	25492.9	21491.3	30304.8
190	fret	0.136818	0.133052	0.138079	0.142517	0.173324	0.195355	0.216111	0.252241	0.165288	0.206711	0.23014	0.127455	0.171303	0.139343	0.190459	0.200282	0.184917	0.171303	0.139343	0.370385	0.242992	0.14828	0.141881	0.0962575	0.0974225	0.195355	0.247581	0.14828	0.146994	0.2656	0.149569	0.198172	0.240703	0.217572	0.198172	0.276836	0.185607	0.268789	0.198172	0.115833	0.219036	0.193951	0.189763	0.262429	0.58531	0.158672	0.124986	0.193251
191	donor	24432	38054.2	23181.4	80955.8	131760	146715	133139	148078	142793	131049	79826.4	126644	132018	173015	142163	144958	144362	128649	138680	89360.2	161946	128202	148951	138605	142263	139883	132795	178006	154837	119321	129604	120031	126178	176240	138706	149914	149823	126289	138535	156022	183377	156853	136537	126397	149551	136772	158106	98747.2
191	acceptor	123241	111578	106012	63202.8	-6281.8	-3689.16	-2258.3	2258.09	-4087.24	7549.06	-2854.54	-3755.44	-1674.28	-1166.65	-2212.42	-2228.17	-7576.31	-7010.64	-2001.01	-5641.72	1338.95	-3590.3	-2961.04	1268.93	102.393	-1663.63	-3562.98	1816	-2575.3	-1190.44	-3124.98	-3264.09	-5442.61	-1137.62	-774.649	-4677.45	-5096.79	-3043.78	-3629.59	-11.587	-2657.99	-580.079	-2602.62	2047.8	-385.668	-5743.68	-60.03	23.381
191	fret	0.834427	0.745334	0.820284
192	donor	92520.5	66125	50209.6	44784.2	56904.5	56078.9	87407.3	117573	138208	142276	162093	153594	150418	153944	149465	151030	148582	142262	142503	144285	144382	145597	148770	157034	169623	148980	133842	141782	157886	159497	147308	150382	156028	146477	139990	151570	140631	155370	158776	157164	147036	144473	142525	142798	146507	148968	145371	156009
192	acceptor	52050	88037	96388.4	100675	92276.7	101645	57353.6	11369.7	1806.22	4048.25	3816.9	245.695	-1721.97	-1080.81	2735.05	468.522	4466.77	120.776	-186.519	3257.24	-632.122	-1954.13	320.159	235.958	-381.605	2833.62	1221.27	-62.237	2655.52	3192.8	1883.51	-313.269	936.437	-1275.03	-3517.69	138.452	1483.78	-68.345	-1599.38	-3298.49	-667.41	-731.016	-1813.44	-2650.09	-4801.52	-966.501	-2588.08	-5148.99
192	fret	0.359842	0.570806	0.657678	0.691868	0.618647	0.644971	0.396548
193	donor	30320	36963.9	37210.2	38954.6	24008.1	26546.9	27337.6	19941	24695	15614.3	17948.5	25215.9	36048.3	36966.9	32706.7	22380.8	24156.6	18558.7	28386.1	24211.5	36003.6	38391.5	22658.4	17294.2	24929.2	25283.5	31590.6	21458.5	29642.8	18861.7	26593.3	27236.2	27804.2	16956.8	21754.2	24757.8	25404.2	25918.5	28110.8	18952.9	24214.5	26013.9	37916.4	39589.6	28911.2	30372.5	24936.4	35700
193	acceptor	5657.07	4467.22	2996.48	1145.07	13310.3	22788.5	13542.6	13797.4	11388.4	32057.2	22657.1	11591.4	12382.1	9584.69	12743.2	25868.8	14540.7	22948.6	15996.1	17035.6	7455.7	12027.2	21940.4	21654.8	18193.4	20369.7	11992.2	19870.6	17865.2	30115.1	17590.6	15291.9	18469.8	22929.1	22225.1	16815	15379.4	15023	11606.2	23463.7	19409.4	12443.1	10122	7121.72	16205.2	9738.62	13857.7	9934.05
193	fret	0.156663	0.107944	0.0747674	0.0291954	0.356519	0.461884	0.330866	0.408906	0.315072	0.672801	0.558318	0.315072	0.255197	0.205369	0.280762	0.536461	0.375248	0.553375	0.360943	0.413216	0.171406	0.238729	0.491895	0.556342	0.421766	0.446157	0.274981	0.480587	0.376344	0.614628	0.398118	0.359838	0.3992	0.575017	0.505182	0.404599	0.377439	0.366459	0.29227	0.553375	0.445104	0.324114	0.210171	0.152959	0.358732	0.242269	0.357626	0.217359
194	donor	51738.4	44643.7	49098.9	50959.5	54076.7	45583.7	51608.1	52850.8	58785.5	49495.4	50336	63050.2	55330.6	65951.7	66451.9	57873.5	58694.5	44552.6	66917	35265.3	26057.8	14366.3	13623.7	34377	48317.1	53507.9	53000.7	53345.4	47835.2	43001.7	55812.6	46366.9	46156.8	53877.8	58288.2	48757.1	43648.9	44052.4	42070	28096.2	56297.3	53202.5	57097.3	58229.3	50488.7	28157.9	46404.7	50183.3
194	acceptor	27202.1	38681.5	27910.5	24769.8	33378.6	30459.2	24599.4	26302.8	21285	26334.9	31335.5	25065.4	29314	20024	23798.6	29947.7	29786.1	22423.8	24713	35590.5	61192.1	76658.3	66877.3	35192.2	28846.1	32302.9	27061.1	25097.9	21123.6	35545.2	37658.4	26376.8	32687.3	23327.6	31261.7	25823.2	28488.4	34912.1	41041.8	44175.5	26570.8	30672.5	38076.2	23422.6	39614.7	46333.2	30330.2	28481.8
194	fret	0.344663	0.464037	0.361962	0.327332	0.381252	0.400503	0.32325	0.332433	0.265895	0.347718	0.383281	0.284371	0.3467	0.232955	0.26384	0.340588	0.336511	0.334472	0.270004	0.50214	0.700994	0.842647	0.831091	0.506142	0.374149	0.376179	0.337531	0.320186	0.305877	0.452977	0.402527	0.362976	0.414661	0.301785	0.348736	0.3467	0.394428	0.441902	0.494132	0.611521	0.320186	0.366025	0.400503	0.286421	0.439887	0.622384	0.395441	0.361962
195	donor	58901.6	52604.3	41725.2	56010.1	64713.1	50604	55916.2	42315.4	40358.4	46101.3	51136.2	52890.5	47724.4	53197.5	37955.7	47712.5	41172.2	46545.4	40836.8	40528.3	33341.2	45084.8	42217	53455.4	47649.9	48198.4	46280.1	40225.7	51720.4	49760.4	26978.2	13727.8	11325.1	10612.6	38016.8	29470.3	33172.7	40279.4	24739.5	31870	27908.3	39177.9	41468.8	34263.8	44133.8	37209	42695.5	35195.3
195	acceptor	17646.2	25448.6	22649.8	30284.7	22296.4	23525.3	21311.5	28082.3	30578.3	38905.6	24984.3	27289.8	17837.4	29419.2	28224.8	32450.1	26420.9	26998.8	36766.2	38012.9	40937.8	29287.2	27395.1	25586.9	25820.9	26575.4	20123.2	27967.5	33374.7	24958	38767.4	43742	42478.5	49436.7	30319.7	26429.5	28293.6	22958.6	42618.6	28057.7	45543.2	35469.5	29806	26771.5	31026.1	25600.4	28772	27260.2
195	fret	0.230415	0.325697	0.351851	0.350937	0.256381	0.317729	0.276369	0.398734	0.430988	0.457176	0.328369	0.340036	0.272168	0.356436	0.426031	0.404518	0.391075	0.367531	0.473645	0.484079	0.551292	0.39394	0.39394	0.32392	0.351851	0.355517	0.302864	0.410338	0.392029	0.333735	0.590106	0.761127	0.790043	0.822567	0.443972	0.472608	0.460243	0.362892	0.632825	0.468469	0.619589	0.474684	0.418153	0.438949	0.413261	0.407424	0.402586	0.436947
196	donor	23836.2	30398	32598.5	11818.2	25520.7	27662.4	24845.7	34207	23902	28807.7	21765.4	22834.8	30356.5	25179.1	31237.3	23207.7	11516.2	13180.5	24602.4	30226.7	27169.8	33124.5	19622.7	21043.8	24068.3	25560.2	29647	30468	29670.3	29406.7	33480.3	27546.8	29406.7	18640.6	22034	35174	26633.6	32644.1	30844	33786.4	17254	23508.8	16331.7	28368.9	22605.7	27539.7	30763.9	22068.5
196	acceptor	29408.2	26536.6	24708.8	36013.6	37242.2	24341.2	30666.4	25589.4	39921.6	24870.4	23514.3	29531.6	30886.5	22776.4	21843.8	31110.1	34235.9	37367.8	33401.5	24847.9	25773.7	23824.5	37712.9	23499.2	25831.8	27465.7	20182.9	39345.7	27889	22565.3	20730.7	23094	26184.6	42939.1	16401.6	27426.1	23415.5	24147.2	28000.4	20843	27272.4	24080.7	43718.5	21691.8	31186.8	18641.7	21687	25992.6
196	fret	0.55276	0.465783	0.431563	0.752484	0.59346	0.467792	0.55276	0.427529	0.625097	0.463774	0.518869	0.563698	0.503877	0.47482	0.411373	0.572637	0.748591	0.738852	0.575614	0.450702	0.486855	0.418445	0.657606	0.527853	0.517871	0.517871	0.405307	0.563698	0.48485	0.434588	0.382017	0.455732	0.470805	0.696853	0.42652	0.438619	0.467792	0.425511	0.475824	0.382017	0.612258	0.505877	0.728127	0.43358	0.579586	0.403284	0.413394	0.540813
197	donor	29424	32204	32982.9	32578.1	30157.6	26014.1	35578.1	16801	24534.2	35741.5	36671.1	38069.6	11780.2	37073.3	31874.5	33017.2	29536.2	31370.4	37182	28002.4	24903.1	32420.6	33331.3	32282.8	27179.8	39822.5	34985.8	28328.5	34271.1	32558.4	22281.4	39481	38480.5	25902.8	35146.7	27717.3	28177.8	37962.6	35055.9	28407.2	31937.9	28453.4	32609.7	27213.2	36307.3	29156.1	37914.7	37142.7
197	acceptor	42604.3	31635.6	33485.2	46493.7	35167.2	38531.9	41416.6	58133.1	37404.4	37122.2	30481.1	31449.6	59834.5	35868.3	31015.8	34586.4	37250.2	34494	30638.7	34196.2	38932	44962.4	30171.9	31544.2	36007	36727.7	35532.1	48207.2	39727.9	34073.6	37814.9	23017.5	30115.2	43726.3	34728.1	35754.3	45218.5	36532.7	33082.2	34973.3	35387.1	42594.7	36197.7	44574.2	31817.9	44207.4	37718.9	24174.2
197	fret	0.591674	0.49525	0.503387	0.587792	0.538592	0.596514	0.537595	0.776133	0.604234	0.509468	0.454045	0.451962	0.835679	0.492189	0.49321	0.511491	0.557438	0.523583	0.451962	0.549525	0.610004	0.58098	0.474756	0.49423	0.570226	0.4799	0.503387	0.630074	0.536598	0.511491	0.629124	0.367874	0.439416	0.628173	0.497287	0.56335	0.615755	0.490146	0.48503	0.551506	0.525591	0.599413	0.525591	0.620535	0.467532	0.602307	0.498305	0.393797
198	donor	20822.5	39356.4	29873.3	35257.6	40330.7	48315	41322.2	32721.1	47236.9	41639.3	29625.4	14665.7	14855.9	72279.3	54564	26846.8	27198.4	27573.1	35943.7	29688.8	45092.4	36312.6	36721.9	40555.5	45398	25394	38497.5	29879.1	32980.5	24552.4	24633.1	20199.9	32306.1	31026.3	34502.5	35718.8	18758.7	22776.8	44642.8	29412.1	33712.7	25013.6	47853.8	33591.6	32375.2	35961	44533.2	42994
198	acceptor	38789.5	33261.2	34272.8	28378.7	14337.3	11218.4	17410.8	23227.7	16300.6	21354.9	26108.3	30705.8	21838.6	16127.2	22293.2	35965.6	22672.5	20411.4	14115.4	12685.4	27498	12041.4	21931.9	9416.15	21720.8	13287.1	10299.5	27045.9	34897.8	41611.4	23825.2	19844.6	40007.8	18012	28730.1	25830.5	26385.8	36636.9	19444.8	27244.8	27972.4	15671.5	29945.4	24144.9	27891.5	23581.4	21440.8	21371
198	fret	0.650441	0.458139	0.534042	0.446243	0.261926	0.188285	0.296559	0.414846	0.256511	0.339305	0.468104	0.676681	0.594639	0.182198	0.29014	0.572502	0.454166	0.425586	0.281908	0.299326	0.379123	0.249313	0.374342	0.188285	0.323406	0.343064	0.211062	0.475108	0.514543	0.62881	0.491203	0.495246	0.553706	0.367667	0.454166	0.419721	0.58407	0.617004	0.303012	0.481129	0.453174	0.384874	0.384874	0.41777	0.463116	0.396425	0.32527
199	donor	46528.8	51073.7	54303.4	43723.8	55485.5	59353.8	49711.3	48008.8	60265.4	59388	62311.8	81792.1	95059.3	91062.2	96789.2	91643.6	95602.1	93564.4	104472	95967.1	99614.1	100169	105004	93555.7	102317	93555.7	97058.4	100430	92679.6	105113	108569	100541	93139.7	92236.2	105351	87988.6	102578	94701.1	93885.9	100639	94484.1	85016.9	118842	98158.4	99084.9	102042	97833.8	84860.2
199	acceptor	47137.4	37446.3	35016.6	58017.7	38303.6	36483.5	46141.8	34189.3	36104	41312.2	32976.9	8728.07	-4927.06	-2318.45	-2198.92	-768.98	-5220.99	-3249.59	-5128.59	2001.44	-7787.11	-712.867	-2065.81	-2023.02	-1866.35	-6044.38	849.956	-2234.28	-5963.49	-7609.21	-4945.34	-37.771	-2233.81	1357.81	-2292.9	-2330.71	-4196.4	-705.019	-1187.9	-5203.95	849.82	-2078.08	-4566.57	-652.656	-4216.04	-1065.31	1219.99	-1639.23
199	fret	0.503018	0.423314	0.391717	0.5707	0.408048	0.380461	0.480939	0.416195	0.374312	0.410086
200	donor	28605.3	22427.1	31529.4	25174.8	29900.6	25565.9	25450.5	6874	14107.1	11404.3	31176.7	22452.7	29015.7	17601.8	24469.4	21901.3	24312.3	28092.4	24129.5	24450.2	14222.5	11904.5	26934.9	26851.6	31599.9	25447.3	26348.2	15642.8	10487.3	15652.5	11455.6	11199.1	12138.5	19782	10189.2	9865.35	23071.5	37483.2	28294.3	23911.5	15732.6	22504	18675.9	19224.1	31590.3	30259.7	13837.8	21654.4
200	acceptor	28825	22393.7	27870.8	28675.4	30907.7	23430.7	32431.9	43569.8	46664.2	44431.5	29427.9	17167.6	23815.3	30753.8	29441.7	26503.2	26790.4	16128.5	26952.1	36657.6	43997.6	53978.7	33307.6	34299.1	38286.8	25612.5	31472.3	33505.2	30353.7	43036	45077.9	42007.4	30064.3	44904.4	50130.2	45384.9	18182.9	29198.7	26377	25716.7	32112.2	41958.2	47856.1	37727.7	26737.8	31458.6	39430.6	37640.4
200	fret	0.502369	0.499368	0.46939	0.532408	0.508372	0.478378	0.560492	0.86344	0.767598	0.796089	0.485371	0.433488	0.450432	0.635962	0.546445	0.547448	0.524392	0.364896	0.527398	0.599694	0.755403	0.819529	0.552464	0.560492	0.547448	0.501369	0.544439	0.681407	0.743217	0.733069	0.797107	0.78998	0.712791	0.694562	0.830751	0.821568	0.440463	0.437473	0.482374	0.518383	0.671299	0.651097	0.718872	0.662205	0.458411	0.509373	0.740172	0.634953
201	donor	44572.5	51736	38461.3	53381.8	61552.5	56826.4	45926.1	46353.3	49339.1	44491.6	26036.6	37872.2	21018.1	11116.1	29535.1	31450.8	34958.3	32628.9	25528.5	27857.8	19273.4	21189	14268.4	13472.5	54213.7	28806.6	14898	26486.3	17708.5	23842.1	40691.8	51875.4	50058.6	22277.2	22830.4	27983.7	34917.8	31936.4	54510.5	38290.4	32705.4	13004.8	34746.9	24377.3	15833.3	45368.5	28883.1	33690.2
201	acceptor	49103.7	33694.5	30307.6	38580.9	47641.5	47809.7	59943.5	47697	47005.6	53342.5	65235	48285.5	63485.8	75288.5	57968.8	50913.8	62620.3	45721.1	64075	59521.1	64409.4	63100.5	64263.3	63569.1	49499.5	65246.9	67155.8	61460.2	69739.5	56562.9	45424.3	45099.2	31331.2	59310	45341.1	60826.9	49227	65280.7	39093.2	53840.3	70830.7	57263.4	61002.7	49115.6	64817.7	45921.4	62564.1	64841.1
201	fret	0.524272	0.394116	0.440681	0.419518	0.436612	0.45716	0.565797	0.507542	0.487889	0.544788	0.714357	0.55991	0.751152	0.870547	0.66301	0.618096	0.642205	0.583695	0.715746	0.681603	0.770085	0.748271	0.818295	0.824487	0.477165	0.693753	0.818295	0.699204	0.796915	0.703262	0.527658	0.465525	0.384548	0.726935	0.665643	0.68429	0.584902	0.670933	0.417533	0.584902	0.68429	0.815212	0.637077	0.668285	0.802977	0.503135	0.68429	0.657765
202	donor	55801	70598.3	62259	62602.6	60997	65173.6	42288.3	54703.3	59773.2	60047.2	46186.6	64776.1	65724.2	61371.9	57523.1	63327.1	53771	56927.3	44225.3	39662.5	57364.8	49735.2	30095.9	38039.5	58333.8	52110.6	53103	42519.6	62581.7	43980	12927.6	32928.7	42010.8	45550.8	37917.7	53220.4	50127.5	59506.2	43631.2	48722	34594.3	34580.4	25396.5	16113.5	17534.7	25807.9	44441.8	58904.3
202	acceptor	33258.3	40389.5	45011.3	32220.2	43565.9	46685.1	72454.7	49051.9	45426.5	50321.9	68593.4	52102.3	54397	58715.5	63615.6	51286.5	56551.7	49076.6	74078.7	63023	54743.7	57144.5	78490	60749.4	78561.5	47010.6	51894.2	50028.9	53481.7	45729	73678.3	62649.4	48605.6	51734.9	55353.7	46225.5	43058.7	50226.5	49390	48867.4	61785.5	61580	77481.1	83680.2	80584.3	69432.6	43425.9	47675
202	fret	0.373398	0.364051	0.419778	0.340077	0.416703	0.417728	0.631223	0.472709	0.432056	0.455483	0.598084	0.445315	0.452435	0.488854	0.524937	0.44735	0.512946	0.462585	0.626366	0.61371	0.487847	0.534902	0.723308	0.614685	0.573521	0.474731	0.493885	0.540868	0.460557	0.509943	0.850951	0.655415	0.535897	0.531915	0.593177	0.464612	0.461571	0.457514	0.530919	0.500919	0.640918	0.63995	0.753504	0.838103	0.821519	0.728981	0.493885	0.44735
203	donor	125897	180439	198553	227534	233827	233084	216179	208397	219182	205950	182353	228544	222888	221947	214314	210128	190974	247479	234677	230531	218571	184507	201794	187407	205937	221089	201604	210620	190506	206737	173662	229867	232659	222008	202899	220859	199590	214016	220708	182641	202673	208560	190363	198641	132704	210177	174798	122125
203	acceptor	40952.4	48115.7	37676.7	27613.3	29324.7	41475.5	45974.2	31527.3	28914.2	27296.6	31174	24627	27987.8	23783.5	22489.4	22766.3	36103.8	10229.9	24661.1	43397.8	29638.1	30896.8	34804.7	27541.5	41902.2	34217.6	35892	29664	35406.3	47489.4	47854.6	34847.1	32991.7	28624.6	35149.5	33086.2	59728.9	26171.1	30868	57229.5	41674.6	45023.6	33762	39958.7	85961.2	65717	86733.4	125464
203	fret	0.245413	0.210218	0.15921	0.108489	0.111402	0.150827	0.17541	0.13129	0.116519	0.117253	0.146285	0.0969224	0.111402	0.0969224	0.094773	0.097641	0.15921	0.0397488	0.094773	0.158445	0.119451	0.143267	0.14704	0.128318	0.169208	0.134271	0.150827	0.123139	0.156917	0.187143	0.215866	0.13129	0.123877	0.114323	0.147797	0.130546	0.230534	0.109217	0.122401	0.238774	0.170755	0.177746	0.150827	0.167663	0.393391	0.237947	0.331213	0.506715
204	donor	66437.8	41565.2	39337.1	24463.8	28402.5	42667.4	48406.1	64403.6	156628	134055	190133	108198	150414	139242	121320	51412.8	60507	39187.1	41036	41752.3	28252.5	30762	34065.3	40990.5	23306	41796.1	56703.1	192532	175075	166191	133254	116313	115773	90203.1	93739	28480	30241.2	27300.3	26090.2	28490.1	19529.1	28977.2	36615.3	24595.3	33234.4	13340.4	9656.2	45755
204	acceptor	67485.1	70921.8	107077	74824.9	106875	93076.7	105759	61227.4	-8908.5	-1230.5	1385.06	-1109.01	-7820.79	-5893.89	-3111.89	-3220.76	-4730.02	-232.062	-768.727	-7161.88	-284.142	-4830.62	2952.45	-1050.93	-1490.83	-1630.95	5407.47	-2500.08	-4467.36	1451.63	-6267.59	3222.53	-2189.21	-1349.84	4974.73	2629.86	-3525.85	5.561	-1221.72	-1683.89	-1285.03	-2119.97	-2184.55	1162.94	-2519.9	-7413.4	1148.55	3326.47
204	fret	0.5035	0.630467	0.731393	0.753372	0.790332	0.685432	0.686431
205	donor	87548.4	86076.3	83904.4	81838.9	79792.8	79491.2	67707.8	66155	90281.5	92882.3	63623.5	77275.8	83696.4	91371.5	91577.9	160292	134152	145758	149750	140913	135987	152637	160168	54.3222	781.518	-2427.18	2276.22	3142.08	726.696	-2825.44	-864.751	-4231.46	-314.919	178.477	1648.99	-4491.06	-896.999	1468.4	-2259.48	-250.423	-1427.48	1995.66	-2020.85	976.62	-1977.31	-1338.8	894.387	-705.123
205	acceptor	54205.7	62603.4	54724.5	62049.8	71490	67841.6	66613.4	62618.7	67884.5	65372.7	56299.6	76674.4	68759.7	65407.1	54602.3	-2138.53	-4366.14	-3377.02	-2446.92	-1240.85	-1409.79	-946.153	-4037.98	-401.012	-1415.68	-2104.02	2436.7	1691.78	-1782.04	2172.34	-321.092	-281.971	3990.01	3483.24	-3479.25	-2011.35	-2743.75	-2436.18	6164.38	128.782	-115.179	-1767.41	1290.84	-5298.16	2597.88	6158.99	-8298.19	1559.64
205	fret	0.382384	0.421119	0.394291	0.431068	0.472936	0.460961	0.495917	0.485921	0.429078	0.413164	0.469941	0.497917	0.450989	0.417141
206	donor	32679.9	28922.7	34493.6	30639.6	30591.6	38883.9	33920.5	27452.4	16388.2	34882.6	30077.7	43085.3	37287.1	23214.2	31183.9	40237.4	9093.21	100.528	702.441	170.964	-285.273	-131.593	1020.21	-142.799	-2516.03	559.166	-44.3473	1321.96	-763.922	-723.101	156.557	-1349.83	1793.41	1638.13	961.776	-1497.1	180.57	138.948	-1196.95	-176.416	1522.07	-2215.88	-137.196	267.015	1197.9	1427.62	-60.3562	1798.21
206	acceptor	48820.2	52563.2	45758.3	55335	49348.6	30097.1	49716.8	51965.4	59734.2	44375.8	49330.9	39249.4	52736.2	52328.6	48090.4	39970.8	8610.19	-1236.29	-2685.59	-3571.62	-5291.81	1786.28	5331.81	-537.074	-633.231	3004.13	-129.323	925.516	-5098.36	-743.967	1196.95	-1101.9	1720.94	1570.51	-1174.1	1295.67	2892.11	1861.06	-35.114	11.813	-134.033	-370.262	4604.85	4180.61	-427.578	-2604.63	-3496.97	3514.89
206	fret	0.598834	0.645053	0.570653	0.6432	0.61696	0.436141	0.59402	0.654277	0.784777	0.559797	0.621687	0.476901	0.586279	0.692273	0.606498
207	donor	74781.6	70415.8	59964.7	74441.4	70765.8	84716.1	72023.7	66865.8	70551.1	72255.1	61381.3	74487.5	52139	67403	60809.8	84951.4	80858.2	78262.1	73803.2	65134.4	70868.8	68504	62379.4	57560.7	70303.1	94425.1	88494.6	88048.5	86607.3	90069.2	95517.3	77952.3	83050.4	83491.6	86319.1	84905.3	91976	75143.4	83096.5	94045.7	89525	84978.9	89021.1	79139.5	81129.8	93025.1	70388.4	69720.7
207	acceptor	24013.1	23059.7	11661.8	20622.7	17109.1	18084.9	25823.6	25879.8	21615.1	15174.1	13945	21053.2	2750.46	2480.52	17451.9	10133.5	3700.59	13071.4	11782.8	12876.7	16011.3	17226.1	13400.9	9813.5	27398.8	15590.5	19398.5	29854.5	33252.7	26762.2	20894.9	27386.5	20008.3	19865.7	15380.1	21771.3	24857.7	27518.7	17783.4	14316.2	20361.4	18464.7	30315.7	31683.3	30300.5	26308	28980	45619.8
207	fret	0.243247	0.246539	0.163145	0.216777	0.194543	0.175516	0.26404	0.27927	0.234449	0.17327	0.185604	0.220099	0.0506611	0.03543	0.223416	0.106261	0.04364	0.142785	0.137107	0.165399	0.184485	0.20123	0.176639	0.146187	0.280355	0.14165	0.180004	0.253114	0.277099	0.228938	0.180004	0.259674	0.194543	0.192311	0.150718	0.204569	0.212343	0.268399	0.176639	0.132556	0.185604	0.178883	0.254208	0.285774	0.271664	0.220099	0.291183	0.395283
208	donor	52320.1	48722.2	52331.6	49178.1	46462.5	49790.9	45992.9	51549.3	47071.1	41900.1	52095.8	48209.4	44842.1	59469.5	50772.2	32351	20872.9	49502.4	28561.5	25606.9	43017.3	51085	56926.7	52351.6	54186.9	58462.9	40590.3	53878.4	60284.5	54129	55497.8	45307.5	50276.3	46016.1	46428.8	50228.9	34024.1	49147.5	42302.4	46165.6	49746.7	39259.4	49379.2	45239	61399.6	28639.4	48755.8	53023.4
208	acceptor	58657.5	54075	58539.4	57520.2	63160.1	58291.6	58150.7	53977.5	51249	53950	62395.7	46625.2	50481.8	63522.8	46449.1	89586.4	98629.8	61982.6	66425.2	81335.3	64543.8	61086.8	61848.9	61235.4	59494.3	60029.6	47861.8	65460	62052.4	55021.3	57327.3	54100.7	45501	57465.6	48892.6	52865.7	72935.4	58004.6	63879.5	50741.7	48207.5	68372.2	58436	54424.7	55406.4	60735.7	53335.4	60935.7
208	fret	0.528803	0.52581	0.527805	0.538757	0.57632	0.539751	0.558579	0.511812	0.520818	0.56253	0.544716	0.491714	0.529799	0.516818	0.477574	0.734693	0.825273	0.555613	0.698884	0.76083	0.599838	0.544716	0.520818	0.538757	0.523814	0.506799	0.540745	0.548683	0.506799	0.503787	0.507802	0.544716	0.475549	0.555613	0.512814	0.512814	0.681785	0.541738	0.601789	0.523814	0.491714	0.634786	0.541738	0.545708	0.474536	0.67988	0.522816	0.534779
209	donor	62185.3	69036.3	91981.2	75609.4	57501.9	129852	124748	173308	146960	142496	143981	146071	146723	151741	145936	143118	170009	150001	159913	166011	156095	146574	136909	171992	139478	164899	159501	158387	141166	160350	140806	147470	169731	147864	147186	168324	147924	152853	43189.5	-1815.29	2993.78	3739.66	-2696.03	-453.401	-1962.64	-4305.16	842.726	-208.66
209	acceptor	88848.2	80853.4	70199.9	63154.2	88225.3	1801.05	-706.038	-4073.94	-774.098	-367.464	-4669.46	-118.757	-1261.16	-4152.5	-2660.19	-3792.11	-1934.07	-1985.58	-11328	-5332.86	-5837.23	-2911.65	-3518.14	-4260.99	-1995.56	2304.41	358.086	34.589	-5941.39	3769	-2638.53	-2341.04	-4117.77	-5270.34	-5492.45	4.491	-698.471	-8025.64	-1210.13	-47.488	-2666.08	-2430.59	-2056.18	17.068	-3050.41	266.219	-565.31	-2444.57
209	fret	0.588114	0.539037	0.433069	0.45504	0.605153
210	donor	52644.1	26466.6	19221.5	17986.4	19356.1	17653.4	18050.2	41833.1	28417.3	33714.2	6015.86	7343.04	20695.1	23833.5	18761	30790.6	61393.5	42718.6	13346	15214	26691	55782.6	39615.6	35615.2	40477.5	18371.3	22874.8	51881.3	64213.2	70579.9	64106.9	66914.8	69309.4	34441.5	47479.5	80042.5	75836.6	72889.4	77593.6	90974	82404	79386	84309.8	64026.6	68237.2	63171.8	56857.1	65141.3
210	acceptor	11922	37674.7	27006.3	38739.8	34443.4	27506.2	43875.6	28930.4	25379.6	30475.2	56904.3	58965.7	41586.3	25017.9	38023.7	44007.2	14300.5	20457.2	39195.6	43534.2	38724.3	19496.5	23712.3	30368	18957	35978.3	39762.3	-3370.01	730.97	10246.4	3035.17	6529.27	954.794	26378.4	22432.6	-1626.58	-7372.57	1222.83	-1942.36	-10751.2	3038.81	-1794.08	1489.98	-5033.07	-3728.82	-2209.58	3179.08	1317.45
210	fret	0.184342	0.587831	0.583784	0.682509	0.640634	0.609113	0.708158	0.408698	0.471285	0.474278	0.904707	0.888933	0.668189	0.512283	0.669211	0.588843	0.189152	0.324056	0.746261	0.741102	0.59188	0.25874	0.374141	0.460321	0.319163	0.662057	0.634523	-0.0691712	0.0112759	0.126859	0.0452028	0.0887722	0.0131568
211	donor	56377.4	53879	73566.6	31900.8	35202.1	34027.3	20316.6	41102.5	23705.5	30200.9	31647	39334.8	24167.1	35239.3	31666.7	31382.3	34106.1	27345.9	29459.3	25044.4	35525.9	45806.2	47972.1	37142.7	16264.9	32086.8	24444.9	26013.5	28623.5	28017.5	38698.2	28470.4	27208.1	39455.1	45388.3	27260.6	18934	29419.9	44392.9	31408.5	35329	22753.8	39763.6	43342.8	31522.3	20865.7	17002.2	11189.3
211	acceptor	33385.1	45060.1	13378.3	46235.6	52637.6	51504.7	61746.8	45150.2	56610	53662.5	64941.4	33776.6	50078.3	46798.4	40030.9	51975.7	44079.8	61785.2	51836.3	41746.6	47203.1	20261.5	41063.5	44255.8	53771.9	36738.7	58140.9	69472.4	48458.7	58314.1	36859	55269.6	47642	46562.7	26034.4	60771.7	64035.2	46806	29363.4	53620.4	55444.9	58562.9	30950.9	27834.8	41338.4	60377.5	95144.8	122768
211	fret	0.371753	0.455123	0.15381	0.591824	0.599703	0.602657	0.752285	0.523372	0.705097	0.639941	0.672125	0.462186	0.674069	0.570083	0.558192	0.623291	0.564141	0.693481	0.637984	0.625252	0.570083	0.306892	0.461177	0.543295	0.76761	0.533342	0.70413	0.727295	0.628193	0.675042	0.48734	0.660442	0.636027	0.541306	0.364585	0.690574	0.771435	0.614456	0.398316	0.630152	0.610526	0.720548	0.437936	0.391176	0.567112	0.743647	0.848339	0.916766
212	donor	25808.2	33821.3	35876	31102.2	27835	34763.6	26606.5	32698.8	35561.9	27829	27098.7	30103.8	27332.8	33353.1	28681.3	21084.4	18739.5	35305.8	26688.5	34127.4	41318.1	24243.6	39551.5	31288.3	29241.5	37484.7	35615.9	31276.3	29889.7	40393.8	35786	25466	31538.4	26238.3	25354	32758.8	26744.5	23331.2	31636.4	24867.8	32104.6	32276.7	37656.7	22432.9	24211.6	18479.4	24173.5	30732.1
212	acceptor	42174.8	30012.4	34786.6	45165.6	44940.8	36215.9	40593.5	42929.8	37738.7	49077.7	40475.3	40548.5	42764.9	37812.9	38400	38335.8	41214.4	33935.7	33777.5	35591.3	36629.5	43574.2	28567.1	34618.7	38276	28619.3	35382.7	39123.9	38602.9	20749.2	31418	39997.4	47106.9	38545.9	35368	48397.4	36688	43098.4	43307.8	43248.5	40406.3	35355.3	40079.6	40897.6	36500.7	50728.1	43406.2	37571.9
212	fret	0.619948	0.470177	0.492574	0.591879	0.61706	0.509742	0.604496	0.567429	0.514769	0.638141	0.598681	0.574299	0.610297	0.531783	0.572338	0.644814	0.687272	0.490546	0.558566	0.510748	0.470177	0.64291	0.419558	0.524791	0.566445	0.433088	0.498647	0.555604	0.563494	0.338971	0.467108	0.611263	0.598681	0.594796	0.582128	0.596739	0.578217	0.648619	0.578217	0.635276	0.557579	0.52279	0.515773	0.645766	0.60159	0.73267	0.641957	0.549671
213	donor	44119.4	32260.5	29554.7	38241.9	23220.2	43870.2	38839.9	37728.5	20878.3	31047.3	35783.1	31799.1	41840.3	22565.9	38185.6	34416.1	35304.3	30986.7	34520.1	40425.7	43315.6	30939	40300	26261.8	37841.2	40735.5	40193.9	32795.6	37197.7	39931.7	34639.2	38783.5	42316.9	45222	35932.6	41272.7	35211.2	32156.5	34862.4	33122.8	40913.1	43018.8	36420	45915.3	80844	75044.6	68424.1	79942.8
213	acceptor	39938.7	41390.4	52267.7	37034.9	40535.9	43385.8	51029.2	51831.7	64557.2	35054.7	36395	27788.7	43142.1	60131.2	34575.4	45450.1	38621.2	37134.5	43473.6	32288.4	33486.1	41801.1	40966.3	27127.8	45127.1	33502.4	38563.6	44463.1	39623.1	31924.7	38774.2	32417.1	41956	35204.3	42707.2	34976.2	36125.6	53871.8	31406.5	45322.2	39893.5	33716.9	37930.4	35907.4	900.138	-4016.06	6593.98	-339.118
213	fret	0.474799	0.561736	0.638389	0.491814	0.635407	0.496816	0.567719	0.578685	0.755326	0.530799	0.503817	0.466787	0.507817	0.726646	0.474799	0.568717	0.522808	0.544776	0.557747	0.443736	0.435712	0.574698	0.503817	0.507817	0.543778	0.451756	0.489813	0.575695	0.515813	0.444738	0.527803	0.455765	0.497816	0.437718	0.54278	0.458772	0.506817	0.626461	0.473797	0.577688	0.493815	0.439724
214	donor	47576.4	49480.1	42805.8	48563.4	60120.9	54181.4	56027.1	44468.2	51925.7	48441.8	42145.6	35095.6	32697.9	47511.8	53518.8	55184.5	59503	39824.9	79910.2	101605	88944.6	74172.5	83625.4	84312.2	112745	90117.3	102203	87153.5	104870	2288.74	416.396	350.85	-302.237	-1281.16	-73.7752	-809.033	-962.449	-1424.12	-1543.82	-868.879	-3057.55	-2199.75	-547.798	-895.478	419.246	-1511.52	-1298.25	876.645
214	acceptor	35989.9	35673.6	43418.6	34547.2	30252.6	38577.5	30391.5	37796.7	40576.4	30266.1	47332.8	50629.6	45647.5	50422.3	45498	32597	37534.9	55104.7	-2685.46	-2784.41	1616.98	-4603.85	-512.736	-2926.28	-6654.8	410.055	-2853.16	-6978.78	-771.911	2121.43	5129.55	-1081.06	2942.37	-1142.34	-1412.71	-2890.62	-1051.25	-1672.61	-197.503	2322.04	-4715.28	1920.73	-5038.15	270.079	-3450.37	1377.5	3045.91	-3558.54
214	fret	0.430663	0.418572	0.503077	0.415256	0.334304	0.416362	0.35181	0.459885	0.438319	0.385035	0.528696	0.590155	0.58239	0.514401	0.459885	0.3714	0.387297	0.580442
215	donor	30940.5	32648.7	16524.6	24277.8	35031.3	29916.4	25605.3	10866.1	16103.3	27326.3	15921.8	32714.1	17000.3	29687.2	31075.2	50771.6	46066.6	39003.7	53640.4	47070.4	46419	50773.8	39013	53506.2	64272	43060.4	37652.3	35858.5	45528.7	11424.8	31301.8	51585.5	51651.8	15677.6	30035.7	27885	27964.9	30219.4	40552	17362	21461.1	20531.1	61195.7	47348.6	66415.2	46845.2	61654.1	64418.7
215	acceptor	43548.5	34993.3	55191.2	56872.9	35383.7	58723.3	85886.6	57050.7	47039.8	79144.1	94487.1	74927.4	80183	88456.6	66506.6	67414.5	29518.1	38936.4	50730.7	52161.1	45969.3	28666.2	49518.2	43891.1	25191.5	78697.9	61407.4	52506.7	43279.5	97037.6	63208.1	44319.5	47672.8	92465.5	85015.6	76637	74883.6	73599.6	68147.6	98840	77639.1	81251.5	30899.5	42400.1	32672.5	55511.4	35869.1	26320.4
215	fret	0.584322	0.516978	0.770011	0.700806	0.502939	0.662763	0.770011	0.840461	0.744935	0.74307	0.855789	0.696075	0.825033	0.748663	0.681841	0.57057	0.390515	0.499923	0.485812	0.525971	0.497911	0.361283	0.559724	0.450267	0.281712	0.646458	0.61942	0.59411	0.487831	0.894257	0.668499	0.462497	0.479745	0.854889	0.739336	0.73279	0.728118	0.709304	0.627168	0.850384	0.783857	0.798559	0.336023	0.472654	0.329679	0.541898	0.367569	0.290289
216	donor	52840.6	45482.4	50379.9	44330.2	96267.8	88120.8	93759.5	55477.4	101515	98250.7	101501	113498	105481	106158	106261	106956	100950	108673	94264.1	97888.1	109966	111558	99723.5	114700	35502.4	110241	95953.5	119428	118469	109743	103918	107853	109827	108518	114015	117400	119710	101591	109690	90570.4	97954	104942	104291	108671	104492	112996	107213	110417
216	acceptor	65520.7	57240.4	48692.4	66826.4	-2529.41	737.834	-21.955	-3158.71	-131.384	-4764.95	-1628.71	431.62	-3232.45	155.634	-4276.85	4929.82	-3699.93	-1082.86	-3574.95	-1347.01	945.239	3329.39	-519.379	-5853.93	-2736.53	-234.959	-1884.21	-1453.25	-6705.65	935.475	-42.656	-2146.91	-1952.22	444.544	-8666.53	-6284.06	-1141.11	-1597.75	-1241.77	927.825	2506.65	2566.5	-1598.71	-5890.47	1864.61	5789.24	3186.25	-1431.14
216	fret	0.553506	0.557507	0.491501	0.601521
217	donor	58580.6	44705	42692.6	51747.1	32843.6	45814.2	48516	40228.6	37828.4	36841.6	45135.9	46097.7	30277.9	41791.1	64840.9	33294.3	15361.2	49263.3	43704.4	52995.9	53792.2	20753.7	18691.4	25049.1	46700.2	37226	38361.9	39914.1	44741.2	51073.1	37875	46388.2	45072.2	54366.2	42783.1	48276.5	52309	46202.9	7097.1	36686.5	56968.9	83398.8	102456	24917.3	-2768.33	-4084.35	-3039.81	-2379.64
217	acceptor	51259	39525	51593.4	38739.8	58027.3	53240	45398.4	46257.9	48269.6	57570.8	52152.3	36212.3	47577.5	55977.8	39485.8	72869.3	62612.4	39073.7	38655.3	44134	42199.2	68447.6	64106.5	55758.2	35957.3	46176.3	40149.7	39244.2	40503	33497.6	46872.1	56907.1	54059.3	46307.7	45951.7	49159.2	49027.2	50626.6	82831.9	47878.8	31060.6	-1277.3	-344.322	-344.459	153.985	-2622.05	2427.24	-2599.02
217	fret	0.466596	0.469587	0.546749	0.427825	0.638966	0.537693	0.483559	0.534675	0.560867	0.609459	0.535681	0.439733	0.61149	0.572986	0.378407	0.686005	0.802786	0.442713	0.469587	0.454645	0.439733	0.767467	0.774726	0.690109	0.434769	0.553803	0.51158	0.495555	0.475572	0.39616	0.552795	0.550779	0.545746	0.459623	0.517598	0.504565	0.483559	0.522617	0.921364	0.565914
218	donor	39099.1	44835	42429.7	46963	48219.6	45789.8	29772.5	24186.4	51849.6	51314.6	46808.3	49039.4	40974.3	53062.1	47093	43347.7	19640.9	25796.4	34698.4	55928.8	21241.1	43566.1	37101.3	40939.9	46042.6	37314.8	48963.3	39153.1	46825.5	56110.4	49309.3	36647.2	55941.1	64440.6	73227.2	71332.4	57075	73907.1	73610.1	61541.9	65432.1	73450.6	83604.3	73384.3	81473.9	89823.7	68021.5	84591
218	acceptor	32772.7	27611.2	33752.3	32029.1	16709.9	20337	40298.9	35441.2	22888.7	21727.1	32253.3	14358.8	25220.9	32001	37930.4	30883.1	58760.6	46309.6	45814.5	17900.6	41704.7	36534.2	46004.5	28908.5	18817.5	43605.1	20994.1	34815.1	23433.7	13734.4	30968.9	33929.9	10753.6	-1898.06	-1959.61	3370.97	-1749.55	259.653	-5579.68	641.319	2095.43	-656.091	-7623.45	-897.875	436.658	2682.28	335.32	-3075.48
218	fret	0.455752	0.380764	0.442753	0.405759	0.257809	0.307787	0.574756	0.594759	0.305788	0.297791	0.407759	0.226825	0.380764	0.375766	0.445753	0.415757	0.749813	0.64177	0.568755	0.242816	0.662777	0.455752	0.553753	0.413758	0.289794	0.538752	0.29979	0.470751	0.333778	0.196842	0.385763
219	donor	42611	24622.6	14027.8	12760.6	26487.5	23639.8	27760.5	29174.3	30312.2	25286.4	20901.4	35090.9	42332.3	28513.4	29424.3	34823.7	33547.8	38668.5	32194.4	34001.9	29651.3	24024.9	34435.8	29412.8	28217.4	36553.6	27033.5	26685.8	41746.1	35990.4	42639.7	23855.4	26415.7	34812.2	32407	26352.5	35045	27875.5	34852.4	33154.2	33570.8	34829.4	25789.3	30125.4	37961.6	23246.2	27553.6	36145.5
219	acceptor	52130.8	46829.8	54903.7	73205.7	48909.7	46488.3	42751.3	49136.1	55860.1	55975.1	41660.3	46303.3	51609.2	45452.6	54588.2	45218.9	56448.7	38014	41051.3	45512.3	34953.1	55554.8	34495.1	52210.3	46756.9	46754	45142.9	48313.8	32034	50805.8	43622	36066.8	41547	42041.8	49530.2	55328	41823.3	25727.2	54077.5	44209	35624.9	45729.9	54220.9	39218	37133.1	47954.1	43597.3	36200.1
219	fret	0.550428	0.655491	0.796506	0.851158	0.648387	0.6626	0.605862	0.627103	0.648387	0.689045	0.665648	0.568538	0.549423	0.61496	0.649402	0.564511	0.627103	0.49528	0.560483	0.572567	0.541384	0.698214	0.500281	0.63926	0.624066	0.561489	0.625079	0.64433	0.434447	0.585671	0.505285	0.601821	0.610916	0.547412	0.604851	0.677845	0.544398	0.480289	0.607883	0.57156	0.515301	0.567531	0.677845	0.565518	0.49428	0.67378	0.612938
220	donor	100880	123890	107553	100718	21913.4	27271.1	30197.6	17384.6	18810.9	99087.9	85344.1	84482.8	48715.6	63686.5	73063.6	46932.8	78217.5	103260	72109.7	71831.8	70799.2	68451.5	63978.2	82278.6	95841.8	84117	86524.9	104246	81074.6	56184.9	62440.9	55147.6	47011.5	72007.8	56235.8	24261.1	38921.8	83538.1	82232.3	87062	72859.8	85316.3	85635.8	99879.7	84871.7	87770.5	88946.7	87552.9
220	acceptor	4988.06	18396.5	11862.5	24879.7	55802.2	48104.2	52630.5	42902.4	35582.9	11374.5	30143.8	20601.7	49803.6	46857	31236.4	34226.2	20752.2	22376.2	24275.3	23533.3	28199.4	39750.1	33336.8	15769	19124.5	17540	3668.72	22140	32817.8	20353.3	38737	53361.6	48073.1	47146	42941.9	50844.5	22237.9	11552.1	9973.09	2507.84	16339.5	-2535.28	9295.12	9545.25	-1690.02	5321.3	-2050.71	-9674.58
220	fret	0.0468374	0.129401	0.0989867	0.197772	0.717608	0.63765	0.635514	0.712044	0.653868	0.103184	0.261203	0.196013	0.505935	0.424193	0.299641	0.421259	0.209243	0.178503	0.252152	0.24674	0.28492	0.367209	0.342565	0.161141	0.166334	0.17241	0.0403112	0.175019	0.288592	0.265744	0.382515	0.491764	0.505935	0.395997	0.433018	0.676744
221	donor	36760.7	41941.2	39934.7	28919.3	36451.6	32648.4	41429.4	38933.5	27982.4	33326.6	42796.9	52602.8	45492.7	42398.4	37798.2	40508	45657.7	53566.2	40796	29703.7	39179.6	46168.1	42865.4	42527	37830.3	22176.9	50997.6	43743.5	46488.3	52003	49595.2	43690.4	35247.8	37683.5	53341.1	44775.4	29656.2	41942.6	47783.1	38613.3	48087.9	34512.3	36381.7	32873.5	37794	28204.8	26083.6	50028.7
221	acceptor	39156.6	23530.7	29987.5	27670.1	49251.4	45807.6	34050.8	34358.8	47923.2	43045.2	29778.6	19060.3	28758.7	30433	25212.5	33995.8	23279.9	30679.3	42001.9	43477.4	35291	24598.3	35428	27051.2	27718.7	53751.3	24915.4	25967.6	34343.5	23907.5	25309	40008.9	36459.4	33486.7	36130.5	34090.1	52749.5	34912.1	40863.4	38791.6	32184.3	37294.2	29755.5	54708.6	31434.9	33530.3	40354.1	36812.2
221	fret	0.515707	0.359837	0.4292	0.4886	0.575034	0.583828	0.451132	0.468403	0.631509	0.563205	0.410249	0.266572	0.387583	0.418087	0.4001	0.456555	0.337437	0.364503	0.507431	0.594487	0.47375	0.348096	0.452219	0.388726	0.422544	0.708256	0.327888	0.372629	0.424767	0.314643	0.337437	0.478011	0.508468	0.470544	0.403492	0.432515	0.639886	0.454389	0.460877	0.501186	0.401231	0.519823	0.450045	0.624951	0.454389	0.543224	0.60696	0.423656
222	donor	42953.1	47315.2	58564.6	55622.6	36435.2	57827.7	54093.3	62789.4	61217.7	84858.3	85779.3	79049.8	86697.1	68469.4	60699.2	97658.8	99739.1	105126	37647.6	29458.7	-1287.52	2160.48	2233.48	3036.52	-1998.21	1764.89	-1295.01	3554.41	1232.03	-1678.12	704.781	584.981	-1121.55	-546.883	-1282.53	-3.41367	-1625.09	-461.401	1376.79	-1741.14	146.961	-2610.32	-998.006	3078.95	-1095.97	-2107.41	3979.32	852.66
222	acceptor	43248.8	27026.5	9940.35	9863.68	48238.4	20877.9	19110.9	2561.18	-2131.12	-6635.55	-3354.76	863.969	-452.689	-11790.1	3310.95	-3538.37	-5435.5	-3090.16	-617.762	-707.26	-472.209	252.375	5067.82	-1004.89	-400.301	1521.03	-5098.49	4852.1	139.723	-2492.1	4991.66	-125.894	575.3	623.287	-1575.21	-774.666	-2523.64	-6952.91	567.085	2816.72	92.029	-884.723	-3046.45	7016.6	-2273.56	4759.78	-8894.96	-1098.54
222	fret	0.502085	0.363482	0.145418	0.150139	0.570019
223	donor	29251.4	12045.4	44178.8	47729.5	44560.6	47312.6	32606	49360.2	48356.2	45076.2	38514.6	52093.2	47325	36866.9	46953.5	34533.7	51881.2	39219.1	45330.9	50660.6	38054.1	46010.7	28392	31949.9	39892.2	49922.2	51490.6	45430.8	56536.8	50391	45738.5	63836.8	52792.1	56288.2	50862.3	45716.4	54161.9	38903.7	59503.4	53431.2	52957.2	46575.7	53046.8	49321.6	48530.7	46089.5	15929.6	52106.1
223	acceptor	58235.2	41735.1	49134.1	39115	51059.3	49007.6	57049.6	48731.6	52717.8	52512.3	65742.7	43906.3	50488.4	60338.4	50702.3	63453.2	45785.9	34034.4	53966.1	45973.2	60105.5	59286.3	72431.9	63163.4	56094.4	46664.9	46723.9	59540.7	47724.1	49525.2	64815.4	44307.5	56164	52266.9	49220.8	62121.2	47353.7	64992.1	51897.4	42642.8	40198.7	46061.5	52701.6	47626.2	45685.9	53368.1	69873.4	50813.2
223	fret	0.665861	0.775684	0.526429	0.450004	0.5344	0.508444	0.636761	0.496414	0.52144	0.53838	0.630918	0.457097	0.516446	0.621163	0.519443	0.647453	0.46923	0.464179	0.54335	0.475285	0.612366	0.563177	0.718731	0.663926	0.584886	0.483346	0.475285	0.567132	0.458109	0.49541	0.58587	0.409261	0.515446	0.481332	0.491392	0.576018	0.4662	0.625068	0.4662	0.443915	0.431714	0.497418	0.498421	0.491392	0.485359	0.53639	0.814189	0.493402
224	donor	36577.6	32689.5	43279	83154.2	20078.1	-2639.64	-1683.58	-2871.65	-1139.99	-2696.8	-2686.71	-1739.62	-1108.61	-491.037	2995.81	3918.24	-536.991	671.247	-872.114	-1385.45	-2985.97	2579.99	1528.67	-348.694	5305.81	-4024.96	-2731.54	-34.8658	-2180.1	-598.636	-160.398	-3197.8	741.858	-75.2154	-263.512	-2181.23	-726.408	2252.71	-93.1486	1844.74	565.89	-2686.71	267.753	-1355.18	-789.174	782.207	-1916.71	-2112.86
224	acceptor	49321.2	52196	42865	2505.71	-1191.92	1703.01	927.683	-758.639	1778.14	-2108.26	-695.244	-1080.89	2196.86	525.044	-3340.01	-4557.62	2828.19	2062.65	-2778.33	-78.82	980.272	50.862	-818.913	476.546	-1413	8325.33	5030.75	-3294.61	-909.492	-2746.41	-5180.61	-792.595	-435.655	342.428	132.213	-3464.15	219.874	-2071.64	1373.24	-505.488	3926.61	-1263.36	830.581	1586.52	-3844.8	-2105.04	-2555.07	-1432.78
224	fret	0.573888	0.614485	0.497136
225	donor	44997	46104.4	56107.3	58763.9	35732.8	44360.2	52771.3	45156.4	49491.1	27635.2	47032.9	46958.7	46683.7	46888.5	54141	50045.1	54047.8	48899.1	41004.1	44701.9	46967.9	53497.9	45984.8	47808.4	46744.7	42778.8	51485	51226.7	50853.3	59117.7	64198.6	90205.6	95325	56359.9	48860.6	59818.4	59123.5	49127.5	58557.4	58298.5	58348.6	60006.5	65044.8	59341.5	107421	102467	106421	99197.2
225	acceptor	52533.9	39443.1	49846.1	54684.3	58342.4	62692.1	42246.1	49754.9	48800.5	68413.9	52424.3	49567.5	49193.2	54489	50885.8	52096.4	42169	46228	53827.2	64794.6	54515.5	49832.4	64187	59073.6	51225.6	49638	44918.4	55708	45177.6	46863.4	42314.7	23825.1	22667.9	53404.1	69358.4	40122.2	46354.2	57860.5	47152.1	45513.2	44358.9	51457.6	42679	36006.2	2419.87	-2369.76	-5588.48	-2658.99
225	fret	0.538614	0.461548	0.470592	0.481632	0.619922	0.585316	0.44444	0.524654	0.496665	0.712178	0.526649	0.513669	0.51267	0.537617	0.484641	0.509671	0.438393	0.485644	0.567458	0.591256	0.537617	0.482635	0.582343	0.552551	0.522657	0.536621	0.465569	0.520661	0.470592	0.442425	0.396961	0.20852	0.191938	0.486646	0.586307	0.401012	0.439401	0.540606	0.446454	0.438393	0.432343	0.461548	0.395948
226	donor	39983.5	47101.7	28014.9	48935.7	35555.3	35189.7	46747.7	45573.9	49842.5	51548.8	55961	70651.5	-2918.7	2300.26	1817.1	26.667	3716.35	1724.24	-289.633	-1939.33	1323.79	633.151	4395.38	2645.57	-2524.05	-1296.57	-1300.92	2394.56	-584.169	-983.172	-3461.34	575.115	1304.93	2010.07	2561.42	-1991.56	-2232.41	2773.25	2436.64	2532.4	-2094.57	-537.74	1338.3	1651.69	-761.181	-782.944	-945.448	-2603.85
226	acceptor	49179.7	54466.3	61109	48093.7	55554.2	72106	49920	49685.4	45193.9	44585	41336.3	-898.041	3373.08	1906.36	4592.43	7888.68	8477.74	8384.31	8148.94	4031.16	1506.29	2337.97	7278.99	7234.47	6904.28	6511.74	14973.9	-805.918	-1485.85	5494.78	-918.053	4182.37	4499.97	1094.56	11203.2	2338.99	6452.27	5149.02	8110.96	6692.94	8628.4	-1928.45	1487.4	-321.999	771.289	7988.84	2139.72	2567.43
226	fret	0.551456	0.536554	0.685398	0.495578	0.609614	0.671887	0.516611	0.521604	0.47546	0.463347
227	donor	56574.4	49025.7	56854	51439	42810.8	30269	46652.6	51353.9	37687.6	48252.5	54294.8	52976.9	53800	45596.1	49867	54737.4	46895.7	49512	55283.2	48620.9	53350.2	52136.9	53639.5	47470.8	50953.9	44330.5	44322	54762.9	94856.1	113190	118024	114059	108536	111941	101371	115311	119091	114550	108865	111724	109731	118454	115401	108383	108896	108018	114104	122023
227	acceptor	53432.9	51590.8	48383	52546.4	54221.7	66931.9	57689.7	58734.6	62160.2	61392.2	60592.6	45193.2	48570.8	55158.8	42282.7	43938.4	45354.4	42615.5	57705.2	51823	53214.8	51157.9	47154.5	50584.3	45018.7	55232	60145.9	44557.2	9867.64	-2492.91	-2166.2	-505.778	-185.082	-2932.22	199.361	3912.81	1551.31	-3482.43	-1056.94	-31.233	-1360.67	7445.52	-1528.71	-2182.81	4224.98	-2436.53	-2486.01	-260.526
227	fret	0.485379	0.512405	0.459274	0.505406	0.55925	0.688492	0.553284	0.533367	0.622633	0.560244	0.527383	0.46028	0.474344	0.547313	0.459274	0.445185	0.491392	0.46229	0.510406	0.516401	0.499403	0.495398	0.468319	0.515402	0.469324	0.554278	0.576131	0.448206
228	donor	87151.1	65065.2	106089	80193	80703.8	69091.6	81528	56455.4	84752.7	50396.6	63548.2	38967.4	70780.3	75747.7	76725.7	68943.4	72688	68437	69523.9	58975	61321.7	71842.5	58384.4	73846.8	66386.7	45891.8	54291.7	53435	63051.9	67408.5	72830.6	76429.2	68126	79555.2	68476.3	85880	93474.8	69468.9	91901.7	111654	109588	100889	108573	94062.1	92394.7	100464	12786.5	59307.3
228	acceptor	41564.1	52716.1	56774.5	43100.1	43007.7	30233.6	52402.6	68574.6	36688.6	71129.2	63414.2	78515	61606.7	45612.5	39670	34272	43667.6	41579.6	54520.3	72494.9	42527.4	43705.1	52517.7	42109.3	58552.1	84662	73797.9	67728.3	51950.8	45225.8	51896.9	39516.1	50857.9	41395.8	39669.6	35202.3	25649.7	45840.4	25723.1	20845.6	29304.3	19090.2	29824.1	31157.8	34864.2	31980.3	64584.1	51079.2
228	fret	0.323289	0.447268	0.348493	0.349406	0.347582	0.304817	0.391392	0.54901	0.302207	0.585207	0.499018	0.667738	0.465611	0.376255	0.341224	0.332214	0.375316	0.378134	0.439253	0.551239	0.409677	0.378134	0.473861	0.3632	0.468697	0.64805	0.576035	0.559076	0.451333	0.401937	0.4165	0.341224	0.427317	0.34213	0.366912	0.290983	0.215245	0.39713	0.218409	0.157183	0.211305	0.159403	0.215245	0.249041	0.273976	0.241691	0.8345	0.462535
229	donor	17329.8	13684.2	18827.4	20494.3	21618.9	18893.8	19101.7	36547.1	42358.1	27726.8	37973.5	37835.8	41759.4	40998.2	52649.1	51059.2	44448	44373.7	54132.9	50246.3	45402.3	44574.1	58135.1	49575.3	46850.3	47182.6	44986.1	47938	41535.7	42782.7	47303.9	44232.3	42339.6	43734.8	43905.8	29627.4	45329.5	39952.7	44262.3	44613.7	46493.1	38188.2	45394.4	44747.1	45296.8	46010.5	49979.9	48445.9
229	acceptor	36550.5	21352	28319.9	23328.1	24569.6	28870.1	22749.6	290.397	-2188.87	-3638.38	-1012.34	-8757.94	1758.17	-4376.82	-8976.06	-6386.91	-4224.15	-1668.43	-8288.49	-4406.19	224.488	1230.24	-3421.89	1432.18	-4167.3	-3428.22	-1533.65	-3915.92	-213.761	1341.67	1309.2	-3140.29	31.506	-1143.62	-1591.69	-1916.05	-5726.63	-5997.87	-4035.29	265.864	-4528.64	1618.92	1297.03	4427.77	-3340.51	-934.436	-2012.56	-3727.09
229	fret	0.67862	0.609518	0.600914	0.532555	0.531532	0.604747
230	donor	49538.5	53137.6	55372.1	31644.1	35703.8	36258.2	32601.7	32792.8	29738.4	38794.6	31684.2	35524.2	34002.7	43225.2	35172.5	47793.4	44846	51123	57474.6	52568.1	43330.3	36378.6	37905.8	39639.4	53485.5	48915.4	33737	48846.6	47963.5	56280	35464.9	47061.3	54324.6	40887.5	37347.6	39863	35067.4	42504.6	32435.4	22488.5	26647.7	44123.5	57338.9	52497.3	46021.5	50494.2	61744.6	49253.7
230	acceptor	32837	28699.8	37594.1	25132.3	36967.3	42476.8	48915.9	40024.2	59060.2	47521.6	53952.9	39538.5	45170.1	39148.2	50294.8	35597.5	38910.1	31404.5	27671.3	42427.3	37066.4	44358.5	60452.4	35326.1	27325.6	36016.3	42759.1	34281.3	40832.2	43922	49619.1	37344.3	40810.1	39236	56184.9	48399.4	47939.6	45725.8	46867.2	68640.4	55905.2	49712	47847.3	28583.3	47094.4	31362.4	27178.2	49075.9
230	fret	0.399021	0.351038	0.404197	0.442252	0.509095	0.539045	0.600116	0.549961	0.664856	0.550951	0.630223	0.527097	0.570701	0.474826	0.588376	0.426875	0.46468	0.380331	0.324677	0.446341	0.460613	0.54897	0.614714	0.470771	0.33841	0.423792	0.558865	0.412461	0.459596	0.438159	0.583475	0.442252	0.42893	0.489987	0.601092	0.547979	0.577585	0.518108	0.591313	0.753599	0.677273	0.530088	0.454504	0.352089	0.506085	0.383454	0.305573	0.499052
231	donor	59954.4	28181.3	29420.7	40022.7	39808.4	53207.9	43441.3	29907.1	40770.2	40149.1	40866.4	38107.3	41234.6	38951	39594	33529.1	35504.9	44928	34265.5	39322	40377.2	36769	53466.2	42677.3	40319.5	40187.6	48291.6	33661	35705.5	39882.6	50163.1	41470.9	44645	48923.7	51707.5	42364.1	46535.6	43743.6	36719.6	40808.7	45169.8	47077	42336.6	44477.3	34155.6	35219.1	43169.2	49500.8
231	acceptor	8501.18	27253.2	31703.1	31512.4	33301	23308.1	19116.2	42570.6	25951.8	37661.5	23380.8	31177.6	29522.2	12123.2	24706.4	35016.5	25491.6	38924.8	26317.4	22839.5	33983.1	30556.4	30253.6	37564	18783.2	32252.1	22276.3	41918	29541.6	27045.1	25210.9	24674.7	21471.4	32203.8	28686	31169.1	26360.6	23407.4	39950	29858.5	35993.2	32473.7	30126.1	37522.3	24836.4	29547.5	30034	26525.2
231	fret	0.124196	0.491918	0.519023	0.440146	0.455023	0.304461	0.305423	0.586949	0.38893	0.483917	0.363527	0.450059	0.417424	0.237582	0.38403	0.510976	0.41841	0.463971	0.434208	0.367427	0.45701	0.45403	0.361579	0.467954	0.317952	0.4451	0.316022	0.554387	0.453036	0.403647	0.334386	0.373281	0.324708	0.396773	0.356712	0.424328	0.361579	0.348934	0.521037	0.422355	0.443118	0.408563	0.415454	0.458004	0.421368	0.456016	0.410531	0.348934
232	donor	69917.5	62214.5	66306.8	61346.9	63004.1	51930.1	72214.2	53355.3	57276	64142.7	53246.1	39986.6	65665.4	49608.1	64667.1	47266.6	57213.6	67835.3	61175.3	51741	59637.1	51850.2	56065.3	58139.7	64423.4	50042.9	64363	56461.1	52555.9	66800.1	59315.4	52826.9	49508.6	58927.4	57471	58818.2	66139.1	63723.5	66156.7	55804.1	52984.9	60284.3	65897.4	60994	60399.4	54476.3	61479.5	67402.5
232	acceptor	20743.8	16508.4	18954.1	27714.6	21756.3	26724.9	21608.3	26313	15021.2	25523.3	23971.6	31670	24140.5	25209.7	18969.9	29119.2	25783.8	26407.6	16922.6	30915	31865.7	30563.7	20784.7	19607.1	17634.2	32790.2	18680.6	25733.7	28754	22715.4	28545.8	26818.9	26630.4	21959.8	28987.9	23421.4	22757.1	17640.5	26426.2	30439.3	31676.6	26227.1	22031.6	18869.3	22016.3	17184.7	24805.7	24246.2
232	fret	0.229157	0.209838	0.222042	0.311274	0.256573	0.339568	0.230173	0.330479	0.207803	0.284958	0.310262	0.442246	0.268744	0.336539	0.227124	0.380915	0.310262	0.279893	0.216958	0.373863	0.348653	0.37084	0.270771	0.252514	0.214924	0.396017	0.225092	0.313296	0.353699	0.253529	0.324416	0.336539	0.349662	0.271785	0.335529	0.284958	0.255558	0.216958	0.284958	0.35269	0.373863	0.303181	0.250484	0.236269	0.266716	0.239316	0.286984	0.264688
233	donor	43032.3	51066.7	56842.3	45995.5	41953.1	56236.5	28919.3	54629.6	52087.3	54481.8	18714.2	40065.9	35872.6	38546.3	57919.4	21588.2	43050.7	54735.4	49619	56328.9	56227.3	42879.3	46452.4	38000.1	31048.8	17269.6	14771.4	6594.25	15305.4	16870.2	19620.9	16378.3	7563.52	17325	14715	10297.8	25116.2	4212.14	25330.7	37100.6	45735.7	44672	68435.6	60301.5	43583.6	43623.7	48994.7	39576.2
233	acceptor	42191.4	31156.8	39102.7	45804.3	48602	34891	63884.7	31519.1	30200.4	58264.8	111962	50191.5	62936.8	45950.8	36095.2	56834.7	57970.7	50590.8	47360.2	44549.1	40623.6	46644.3	47815.9	41493.1	75071.7	60233.7	66333.7	100207	103139	91990.4	95292.4	82428.5	102146	93532.8	97513.5	79391.7	79147.7	67913.2	63003	56711.1	41270.4	46014.4	42415	32619.5	49668.1	44201.7	47543.6	30646
233	fret	0.495548	0.378929	0.407558	0.498557	0.536515	0.383028	0.688575	0.365588	0.366615	0.516571	0.856955	0.556385	0.637075	0.543478	0.384052	0.725188	0.574204	0.480481	0.488522	0.442118	0.419782	0.520566	0.507572	0.521564	0.707884	0.776778	0.817494	0.93866	0.870974	0.844773	0.828807	0.834443	0.931286	0.843835	0.869107	0.884956	0.758685	0.941423	0.713661	0.604751	0.474442	0.507572	0.383028	0.351176	0.532533	0.503567	0.492538	0.436036
234	donor	47971.5	72273.5	48911.4	9944.76	3045.7	14675.4	86750.5	25261.6	59510	85389.3	59667.6	68559.8	85268.9	52545.5	53520.8	54921.9	91851.1	102259	53575.7	58167.4	15182.6	9132.27	15159.5	38591.6	24047.3	45917.2	36840	68274.8	54736	60365.9	30914.5	40019.2	38987.2	57501.8	39270.4	48575.1	32389.1	58043.5	54282.8	69473.2	82254.4	72250.5	65256.7	68890.8	34711.5	57304.5	57982.4	52634.9
234	acceptor	41803.3	16228.8	36120.7	91772.2	87787.4	78097.6	13280.4	61595.7	39299.4	8849.41	32541.4	26604.9	10642.4	35496.5	26591.6	32844.6	7507.4	11397.1	41306.8	28154	63983.3	77260.8	76223.1	82263.1	71170.9	34651	46321.4	24888.5	39339.3	37861.1	64382.5	50461.5	55495.2	40037.6	55703.1	51006.9	60565.3	32399.5	43091.9	20833.1	18972.8	18045.5	26429.8	27042.5	56332.7	27083.2	54022.3	32399.3
234	fret	0.466065	0.183852	0.424926	0.902329	0.966456	0.841883	0.132649	0.709077	0.397855	0.0933593	0.352501	0.279257	0.110758	0.403081	0.332226	0.374742	0.0758574	0.100331	0.435268	0.325792	0.807954	0.894524	0.833877	0.680938	0.747055	0.430102	0.557428	0.267229	0.417663	0.385272	0.675274	0.557428	0.586889	0.410382	0.586889	0.51263	0.651544	0.357812	0.442485	0.23084	0.187234	0.199604	0.287972	0.281438	0.618928	0.320426	0.482351	0.381065
235	donor	84463.6	112432	94058.2	98124.4	97521	105539	108398	111211	102054	106545	96503.3	99622	89575.9	92501.6	101300	105230	87953.1	94386.1	77132.4	79184.1	83568.6	93886.9	91462	80382	82024.2	80322.2	79403	90658.3	112293	95391.8	94479	96943.5	101927	85033.1	111803	100830	92947.5	71971.6	110244	101269	90059.8	87273.8	90385.3	92174.5	96556.6	111754	86281.9	92957.2
235	acceptor	71262.6	59147.1	61139.2	64159.2	68227	56333.9	53763.1	49330.3	61454.9	68919.7	57130	53290.8	69807.2	56639.3	58019.7	54899.3	59295.1	72064.2	76375.2	72919.7	74176.1	74450.4	62838.6	79070.9	74884.2	87921.4	76984.2	55378.1	62134.9	56677.8	63951.6	71926.1	59386.1	69985.7	47588.6	54854.5	68522.7	72422.2	66178.8	64370.3	61197.1	62670.7	66244.8	57451.2	72993.2	46267.9	79895.6	54795.6
235	fret	0.45749	0.344312	0.39383	0.395815	0.411703	0.348267	0.331468	0.306804	0.375982	0.392838	0.372019	0.348267	0.437563	0.379946	0.364097	0.343324	0.402764	0.432586	0.497436	0.479445	0.470459	0.442542	0.407729	0.495436	0.477448	0.522464	0.492436	0.378955	0.356179	0.37301	0.403757	0.425621	0.368057	0.451509	0.298921	0.352222	0.424627	0.501437	0.374991	0.38887	0.40475	0.417666	0.422638	0.383912	0.430596	0.293012	0.480444	0.371029
236	donor	112785	92489.4	77585.4	76943.1	56582.6	54739.6	59700.4	34054	64513.8	77664.6	202786	209666	215820	210834	208537	204563	213483	199760	158804	146910	162180	193182	174550	152237	141480	162324	150164	166329	150168	136442	144298	147326	159687	141511	133999	138083	132831	144944	138038	146822	146822	-3683.5	-1937.27	838.065	-5073.35	2915.42	-2425.24	-179.702
236	acceptor	109257	98970.4	124204	129776	153162	169252	154279	162368	127677	117874	27536.9	3763.3	-664.045	3383.92	4420.96	4318.51	4994.04	602.03	6079.35	-7205.22	-3518.04	-3824.69	887.336	-4225.12	4983.66	136.044	829.26	-5300.22	-2103.51	2703.55	784.928	-737.716	-5349.61	1829.72	-805.178	-2697.38	-205.551	3374.2	258.241	2783.59	-4213.06	-1529.88	26.319	1167.82	-558.424	-4667.67	3037.43	4030.73
236	fret	0.492005	0.517168	0.615513	0.628002	0.730595	0.755359	0.720951	0.826277	0.66467	0.603068
237	donor	67458.1	58682.4	55813.8	55164.9	65055.8	55141.9	54930.5	59644.1	51544.1	41333.5	63497.3	58813.6	50768.4	58970.3	112970	116081	113975	103818	104948	108936	103989	116895	107058	104673	121082	112053	103108	110755	108085	67777.8	60423	67409.1	57928.3	68196.3	61221	52972	53740.1	61959.2	53479.6	47410.1	57967.2	78375.7	57885	63842.5	54247.7	68564.4	66515.5	62930.4
237	acceptor	46468.6	58354.5	52144.4	66093.3	63923.3	64837.5	70720.4	64353.9	62715.5	65171	52797.4	68634.1	70256.4	60032.3	443.422	325.146	-1838.44	-4141.11	-1189.85	-397.602	2075.39	-5404.75	-538.871	104.821	-3715.02	-1245.92	4409.31	4566.41	-4707.84	43666	59432.3	75074	63971.7	43932.6	65755	59228.5	61012.6	53899.2	60641.5	70592	73107.6	64581	63170.6	69895.9	67192.5	57668.1	62408.3	55494.6
237	fret	0.407563	0.498236	0.483241	0.545346	0.495236	0.540325	0.562431	0.519262	0.549364	0.611824	0.454306	0.538318	0.580552	0.50424	0.00383206	0.00287393	-0.0162719	-0.0411134	-0.0114884	-0.00383077	0.0191732	-0.048746	-0.00478826	0.000957895	-0.0315653	-0.0114884	0.0412623	0.03934	-0.0458842	0.391694	0.496236	0.527281	0.525276	0.391694	0.51826	0.528284	0.531293	0.465273	0.531293	0.5987	0.557402	0.451316	0.522268	0.522268	0.553381	0.457296	0.48424	0.468265
238	donor	77595.1	80143.2	24113.7	58036.8	64979.9	54396.3	86032.9	65244.2	62893.1	47319.7	31578.2	55227.7	59904.8	71596.3	88543.1	30195.9	44063.8	99899	83630.6	61484.1	45088.8	55933.3	59081.8	54128.7	40413.3	49665.2	98533.5	47954	81667.3	79171	136673	169468	162779	164780	162081	166036	158789	3564.28	6326.61	3156.38	2149.73	5447.94	3780.75	1610.51	7938.15	1485.86	2167.53	2113
238	acceptor	99433.7	103980	122229	107332	104497	110137	78950.6	107305	108441	110927	114761	107248	106218	94904.8	91907.5	119461	113966	86150	84788.9	108099	111701	105875	114286	113742	117337	115549	83608.8	115969	102217	104635	49616.6	-1827.49	1599.16	2917.86	-2413.05	-179.712	-2521.38	-728.582	-2216.57	4825	1227.38	2960.01	1770.04	-3077.34	812.619	2348.96	2567.17	8076.4
238	fret	0.561873	0.564851	0.835596	0.648713	0.61627	0.669284	0.479009	0.622179	0.633001	0.700518	0.783795	0.660475	0.639879	0.569811	0.509068	0.798221	0.720942	0.462926	0.503066	0.637915	0.7122	0.654596	0.659496	0.677105	0.744213	0.699544	0.4589	0.707337	0.555914	0.568819
239	donor	7157.01	3434.87	7929.92	6947.09	10726.5	9835.4	55740.1	94062.5	101469	104413	96804.8	87377.9	94260	102363	91497.2	96200	91160.3	88233.8	81293	78456.8	81301.8	93816.6	99072.9	84799.4	70012.1	-5246.21	-1531.41	-514.079	-1791.98	-4405.78	1460.4	-1109.36	1087.52	-2012.92	-230.753	5311.72	-4479.91	-3064.01	2503.42	-1202.58	-3513.96	-2415.89	2017.51	1407.55	1187.35	-4792.6	-3996.2	-3489.74
239	acceptor	77217.2	90376.4	82325.8	67134.1	84355.5	84385.8	30338.6	-6749.62	-4636.62	-776.897	-6405.53	-514.458	-7897	-8130.03	-75.492	190.434	1943.47	-2606.32	-3536.21	-2001.64	-4410.28	-514.486	-1855.19	-4838.25	3645.94	-2319.67	-2825.64	-3185.61	-1359.85	8032.37	-2999.86	-4123.36	393.73	-1939.53	-2387.52	-4101.07	-5525.55	-2733.95	-4073.02	-3152.04	1297.38	-4582.22	-1067.72	-1733.98	-1552.95	-2624.87	-806.024	-3178.72
239	fret	0.914849	0.963584	0.911745	0.906573	0.88694	0.895203
240	donor	-5254.64	-3488.79	-2084.45	1633.07	739.4	-1113.67	5570.53	-1961.84	-605.53	-5671.77	-2184.31	4607.34	-7187.35	-3139.92	-4257.32	6.2613	-2035.15	1525.63	1291.78	-616.907	3486.14	-2812.53	5413.79	205.978	-4261.11	3191.62	2232.22	5226.71	21545.4	5908.03	6968.55	6825.72	5466.88	2758.06	-1482.77	3513.95	7226.41	9390.44	31425	29168.7	26845.5	38829.7	45869.1	23899	32632.2	29810.9	22957.3	26122.4
240	acceptor	73324.2	75265.7	70418.3	60064.9	62224.9	72028.2	76020.2	60241.9	61871.8	48204.1	64341.5	61185.4	64504.8	66210.1	64246.7	77742.3	68051	63536.2	50543.4	63515.1	61114.2	63797	59161	90562.2	64469	53089	55317	77795.6	63913.6	64404.4	82640	73926	61032.4	84190.8	80912.6	71646.7	75337.9	80865.8	49538.9	34026.3	38822.9	28368.3	29854.7	34207	36976.9	35288.2	37985.6	36824
240	fret	1.07694	1.04866	1.03035	0.973201	0.988002	1.01566	0.931376	1.03402	1.01014	1.13311	1.03493	0.92951	1.12498	1.04958	1.07057	1	1.03127	0.976905	0.975053	1.01014	0.946281	1.04592	0.916433	0.998156	1.07057	0.943489	0.961149	0.93697	0.747628	0.916433	0.922041	0.915498	0.917368	0.968569	1.01841	0.95279	0.912692	0.895826	0.611459	0.538236	0.590773	0.421668	0.394218	0.588799	0.531263	0.542216	0.623251	0.584848
241	donor	8729.22	10406.3	2073.4	-2612.6	6370.86	4863.68	13926.7	6177.49	1668.6	3372.76	432.488	1589.08	-2195.14	2400.5	5472.7	20976.4	106291	113862	33910.4	-1192.16	331.286	-716.875	1374.03	56.596	-3915.57	616.82	1679.44	2420.38	461.402	2751.09	1820.4	-2063.22	367.43	-1929.49	165.026	-1790.34	1614.38	-534.35	-3024.64	2413.15	2593.87	-3259.57	1276.44	-3472.82	3139.63	-480.135	2165.57	-2777.05
241	acceptor	97731.2	113225	120907	81508.4	103203	142136	112299	119267	114164	97578.2	89733.9	79296	128354	107688	107394	82695.3	4063.01	-1544.17	1110.87	6343.2	-4166.15	-1520.58	-3949.71	-1704.53	2431.7	-1558.63	1362.43	2326.55	2635.61	-677.592	120.78	-2411.64	2844.36	744.421	-3343.63	1877.75	-480.179	-654.842	-1357.84	-5598.89	-3502.35	4883.23	-238.283	-3959.16	-2051.38	-3362.5	20.176	-118.521
241	fret	0.91781	0.916118	0.982818	1.03316	0.942202	0.967157	0.889727	0.950551	0.985281	0.96633	0.995105	0.980353	1.01707	0.977885	0.951384	0.797988
242	donor	69049.1	56685.5	64326.2	53013.6	58131.5	63704.5	68762.3	62387.3	72542.3	81428.2	75542.6	70380.1	68559.6	64844.9	75783.1	63192.7	62328.9	55818.2	52807.6	58710.3	46497.8	80195.1	66301.2	43990.4	59194.6	71456.9	104498	143997	138072	126100	142673	144929	147990	136871	147164	138278	148510	139815	155723	151090	117794	124487	134539	126120	151303	132487	157212	144112
242	acceptor	64806.8	87543.2	84614.6	84003.4	104465	79900.7	74571.6	86639.3	81024.9	65130.1	74919.8	78097.2	71767	76870.7	62549.5	66672.8	75479.8	84408.5	63746.9	62515.5	60221.7	69686.7	53070.7	69971.9	67731.1	44411.2	15226.4	2198.49	5136.36	-4020.64	7525.79	-1356.17	908.511	4638.55	2762.13	-2248.5	-13293.5	-843.923	-8543.71	-5591.45	1003.35	1745.63	-481.331	-659.309	-9475.87	-2644.76	-2460.1	1976.22
242	fret	0.484122	0.606725	0.567862	0.612892	0.642817	0.556674	0.520252	0.58112	0.527311	0.444317	0.498138	0.526302	0.511192	0.542469	0.45225	0.513204	0.547541	0.601592	0.546527	0.515216	0.56379	0.465171	0.444317	0.613921	0.53337
243	donor	42508.9	52429.5	78928.9	44210	45976.7	47595.7	53702.3	46966.5	68734.2	61529	54341.5	63558.6	42647.6	29432.3	24445.4	29209.2	31142.3	44968	45300.9	31121.2	56911.5	52941.1	47410.4	44124.6	56147	24389.9	46356.2	53294	55862.9	31397.6	39397.3	45791.3	41597.8	29864	28100.7	32209.9	37223.4	43289	51642.7	46531.5	62303.5	40793.3	29535.5	37853.7	38150	41125.1	24131.3	64861.4
243	acceptor	58997.2	40358.6	27791.9	72904.1	67845	49740.8	42500.3	46684.9	36015.2	39612.1	46152.7	40851	52645.2	76112.8	82403.1	68705.6	65164.7	66331.4	60550.8	59692.1	51344.1	45207.8	58363	53170	36311.6	62424.7	58817.2	44470.7	44090.8	68531.5	57045.3	54182	66659.9	57899.5	61611.3	63551.7	58136.7	52320.4	51428.8	51494.2	39437.2	54138.3	56866	56189.2	60003.9	69421.6	64318.1	45950.8
243	fret	0.581679	0.435192	0.260729	0.622034	0.596461	0.511255	0.442087	0.498062	0.343778	0.391395	0.458925	0.391395	0.55241	0.720631	0.77159	0.701673	0.676274	0.596461	0.572228	0.657685	0.473893	0.460915	0.551372	0.546189	0.392358	0.719511	0.559691	0.454951	0.4411	0.686179	0.59117	0.542051	0.615613	0.659864	0.687282	0.663136	0.60921	0.547224	0.499074	0.525578	0.387545	0.570134	0.657685	0.59752	0.611342	0.628473	0.72736	0.41464
244	donor	91721.2	91327.9	89272.5	91908.5	80760.4	89817.1	69446.8	62006.9	94486.8	93728.3	106411	61132.9	97552	93856.2	93545.7	85230.2	107545	101023	98223.1	94461.8	88721.5	87565	91644.7	88041.1	86959.5	99242.2	85643.8	98380.7	86856.5	75979.9	85342.6	100986	88952.5	152962	145475	150477	144938	133055	94794.2	530.668	-4825.68	-1445.19	-326.162	2712.53	-3470.99	-3021.5	-327.722	-3645.78
244	acceptor	50384.5	57156.8	48734.1	39321.5	72340.6	52557.2	57875.6	61653.5	38482.9	42946	22074.3	71251	43847.2	43191.4	48610.4	56174.9	30375.3	35618.9	37760.5	34818.9	38242	38958.1	38148.4	46576.9	44291.3	42094.5	48036.8	35868.6	53664.3	47055.5	68739.9	49089.4	55685	1687.84	-1093.41	-4960.27	-4115.92	1091.52	-4142.59	-3895.11	894.8	-1706.09	-3433.94	-638.004	2206.84	5086.39	-1335.77	-2082.32
244	fret	0.354513	0.385417	0.353552	0.299266	0.472991	0.368961	0.454092	0.499036	0.289839	0.314404	0.171648	0.538504	0.309664	0.315358	0.342045	0.397084	0.220036	0.260795	0.277626	0.269199	0.301155	0.307775	0.293606	0.345876	0.337263	0.297378	0.359322	0.26733	0.381537	0.382507	0.446168	0.326767
245	donor	101231	91602.1	95249.2	91325.3	99657.4	88373.9	91088.5	90611.2	84922.8	87443.8	96911.9	90092.1	84302.7	91544.3	94785.7	93608	95310.9	93503.9	87883.4	100234	99058.1	88695.5	92957.1	94474.1	95100.3	93700.6	89979.5	102628	102794	100866	95142.7	96903.4	96548.6	91023	89796	88873.6	94958.4	97876.7	95930.1	101258	89676.5	89881.6	93484.7	92669.5	94140.2	93810.1	92470.5	100918
245	acceptor	26151.9	31839	20035.9	23193.9	23135.8	25921	22862.1	30266.3	26278.1	23992.2	34618.6	23451.6	25527.8	29041.1	23572.9	23095.2	19506.9	25483.6	26132.9	29030.2	26377.4	22248.1	22616.3	19938.3	19980.5	25993	22964.5	19390.3	23708.1	28795.7	19552.6	30857.5	34801.9	24951.7	23285.4	21704.3	25324.4	25856.5	16042.2	19745.5	27977.3	29820.5	21615.7	25990	26056.5	22072.2	22425.5	18520
245	fret	0.205064	0.257903	0.174227	0.202251	0.188216	0.226687	0.200377	0.250315	0.236123	0.215392	0.2636	0.20694	0.232346	0.240848	0.19944	0.197568	0.169574	0.214452	0.229516	0.224803	0.210694	0.200377	0.195696	0.174227	0.173296	0.217272	0.203188	0.159355	0.187282	0.221977	0.170504	0.241794	0.264553	0.215392	0.206002	0.196632	0.210694	0.208816	0.143611	0.163068	0.238012	0.249367	0.188216	0.219154	0.216332	0.190085	0.19476	0.154718
246	donor	35148.6	35160.3	34372.9	36773.2	31065.3	35438.4	26229.6	35180.8	21701.3	38895.4	31955.1	43956.4	36272.7	28749.9	26750.7	30368.6	37712.8	42053.8	31466.3	30512	36647.3	32107.3	48947.2	47922.7	37891.4	34059.7	37484.5	44477.4	39158.8	20433.9	36568.3	42083	39750.1	16236.4	30983.3	30175.4	39445.7	41067.3	12079.8	27339	34431.5	22986.4	12688.7	-6001.14	-3928.72	-5392.29	2253.4	122.444
246	acceptor	33459.4	34217.3	31551.2	34880.4	26432.2	29358.1	29112.1	31574.1	43682	21160.2	29618	22936.6	26493.2	32484.4	27621.8	20140	25988.7	20777.6	32670.9	30298.4	33948.3	36238.1	19233	29736.2	26978.1	22117.3	30757.5	36727	40209.6	49601.3	28563	19400.4	22640	43550.6	42929.9	30349.9	31882.7	27387.5	52005.1	24336.7	31381.1	35957.6	11291.7	1655.2	12614.7	3079	2044.34	3396.4
246	fret	0.487386	0.493496	0.478278	0.486369	0.460186	0.453205	0.526499	0.473232	0.667746	0.352042	0.481313	0.342741	0.421679	0.53067	0.507861	0.39844	0.408081	0.330734	0.508891	0.498622	0.481313	0.53067	0.281837	0.383137	0.415837	0.393641	0.450223	0.452211	0.506832	0.707892	0.438349	0.315173	0.363277	0.728909	0.580489	0.501696	0.447246	0.400363	0.811912	0.471218	0.477267	0.609803
247	donor	35925.4	32881.7	30738.6	41460.1	23062.9	20533.8	30875.3	44807.4	28418.6	24289.2	39260.7	43528.8	24715.4	18569.6	77464.4	102126	87572.7	84959.1	89858.5	57442.8	64018.8	56288.8	87846.1	92429.8	80389.5	73369.2	75872.1	77249.2	78091.6	92835.9	72142.8	72617.3	72388.1	81593.7	91633.7	90793.3	86921.3	75017.7	74010.5	81491.2	78153.9	81056.9	99454.1	77995.1	93125.4	69529.3	82154.6	79748.2
247	acceptor	47275.9	46520	56951.4	53553.7	57136.4	75872.2	35342.9	46530.8	51049.4	55352.1	41693	43699.7	44799.5	34622.3	5136.4	5797.38	-100.113	-2226.63	5378.77	-3023.3	-6172.03	-3865.3	16546.6	-1521.1	237.102	4873.64	9073.97	6025.47	-7371.89	730.322	-832.669	-3408.9	-10933.7	5061.77	-615.577	2577.07	-9868.25	-8246.11	8971.1	-5888.27	-7590.85	14737.4	-12007	5308.35	-112.271	-2344.45	-3780.2	-823.129
247	fret	0.567756	0.585483	0.649815	0.563806	0.712163	0.786628	0.534055	0.509092	0.642072	0.694996	0.515097	0.501071
248	donor	47881.7	43141.7	45249.7	42485.2	40943.4	67245.2	65185.4	48447.9	61722.2	58277.2	41419.2	44948.6	71834.6	63402.6	25747.7	67727	39160.6	57982	69726.6	42852.6	44502.9	49393.4	49309.1	61565.6	62975	36823.7	76273.5	38630.6	73876.4	54555	67799.3	63161.7	40130.3	48706.8	63258.1	36444.3	66275.5	64625.3	57578.5	57674.9	56813.6	68744.9	53717.9	59891.3	58144.7	53169.8	40503.7	95191.3
248	acceptor	49186.3	49830.4	42201.7	53143.2	68643.1	45021	32798.9	67008.5	55082.5	50086	40468.4	59004.4	46336.5	49791.1	89884.6	46274.2	42412.8	54630	42963.8	54865.8	64548.7	47221.8	71070.2	66756.8	83426.6	107329	45325	75855.2	45506.3	65472.6	36700.5	52358.1	80727.9	75417.4	47214.9	56927	47766.9	39917.7	63650.3	41306.7	50401.8	42911.6	53977.7	33075.3	27855.7	52747.5	68151.9	52447.6
248	fret	0.507008	0.535998	0.483005	0.555984	0.626881	0.400928	0.334786	0.579958	0.472001	0.461996	0.494008	0.567972	0.391913	0.439978	0.777393	0.405936	0.520005	0.485006	0.380892	0.560979	0.591942	0.489007	0.589944	0.520005	0.56997	0.744531	0.372876	0.662798	0.380892	0.544992	0.350827	0.45299	0.667784	0.607916	0.426964	0.609913	0.418954	0.381894	0.525003	0.416951	0.47	0.383898	0.501008	0.355839	0.323756	0.498008	0.626881	0.354837
249	donor	73717.4	60404.1	49552	56858.6	62851.8	43939.8	56150.4	74263.2	60614	72946.7	74380.4	68606.6	89562.3	82578.2	77680.4	63864.9	62637.9	109884	131783	134342	134500	140726	130651	130065	142104	144632	134860	146136	141260	134089	133867	138639	148872	133884	134185	139254	115469	149092	133510	135955	132016	136144	130164	129927	137589	137294	149445	137998
249	acceptor	54726.9	73295.3	70542.8	80410.3	59754.7	99979.8	70058.9	58971.2	58928.9	48250.7	66521.5	72018.6	62412	41084.4	40324.6	62989.7	60825.3	28343.4	-9004.31	-4825.9	-8074.83	-2739.91	-1405.83	-6816.23	-2482.92	-7320.11	-2915.92	-3640.63	2903.39	-2939.27	544.467	-8420.93	-3673.89	-5760.49	-1246.09	563.393	389.677	-10602.6	-5182.63	3938.57	837.979	-1141.29	-1263.88	-6139.62	-2162.81	-6494.09	-466.147	-5001.38
249	fret	0.426012	0.547954	0.587413	0.58545	0.48697	0.694775	0.554889	0.442363	0.493012	0.39826	0.471822	0.512083	0.410619	0.332715	0.342147	0.497035	0.493012
250	donor	72432.6	79142.6	69626.4	68286.3	57569.9	95648.6	98506.1	71400.3	61821.9	68894.2	64735.4	52029	77822.7	75635.2	41915.9	73707.4	67633.3	63364.2	68497.7	72973.6	82807	67027	75248.1	73970.2	78029.5	78573.6	80339.7	70158.1	55387.1	77057.8	69021.6	38814.3	59336	105798	99375.2	75633.7	49978.4	27102.9	11901.2	62725.2	59088.8	-2997.22	-10.6889	-1835.88	-508.185	1121.12	-993.245	1167.76
250	acceptor	67452	53734.5	55526.8	72201.1	76513.9	50638	52385.7	60962.7	68938.9	59200.4	57335.2	84615.5	62457.8	70890.1	79702	72113.8	67527.9	56472.7	62411.5	50876.5	64961.1	68005.5	61982.3	53841.2	79053.7	88826.8	64423.3	50683.6	60908.4	53520.4	80527.1	87951.9	82998.3	72382.1	63812.8	62799.3	110740	117564	110202	64708	63890	-3812.62	-1426.27	3045.58	-2174.16	-2920.01	1913.81	2949.76
250	fret	0.482106	0.40455	0.443917	0.514139	0.57091	0.345681	0.3467	0.461022	0.527119	0.462027	0.470064	0.619423	0.444924	0.484112	0.654895	0.494132	0.499138	0.471068	0.477091	0.410618	0.439887	0.503141	0.45197	0.421734	0.503141	0.531109	0.444924	0.419712	0.524125	0.409607	0.538087	0.694141	0.582819	0.406573	0.391389	0.453983	0.689244	0.812762	0.90211	0.508142
251	donor	54973.8	60376.9	59663.4	56524.1	50338.1	51338	54822.9	30088.3	53404.5	62668.1	48496.2	48904.4	62183.6	54744.8	45504.4	53811.9	48111.2	65253.5	60776.5	69581.3	58559	52243.5	61722.3	54871.7	57635.5	9417.37	63961.2	73396.3	78456.4	58597.6	59353	57604.6	49616.1	46531.7	55659.8	54019.4	63434.7	58414.1	59519.4	63200.6	64346.2	59770.6	71470.4	75528	53350.5	65366.7	67467.5	67405.8
251	acceptor	40600.9	55486.6	67915.2	59763.7	58937.9	57786.5	61186.1	87850.4	68559.3	51304.1	57591.5	54197.1	60490.4	49744.8	67091.7	59163.2	64666	38868.2	48171.1	57815.5	57037	61288.3	49658.4	54036.1	49988.1	113988	66781.1	58286	56531.7	56259.3	49709.6	52556.9	65418.7	64733.5	55792.5	59670.8	48170.3	50660.2	43990	49379.6	47336.6	65434.6	51817	50544.3	60381.3	47837.2	44299.3	50813.5
251	fret	0.424999	0.478862	0.531889	0.513862	0.538905	0.529885	0.527882	0.744602	0.561974	0.449915	0.542915	0.525878	0.492854	0.475865	0.596137	0.523875	0.573021	0.373288	0.441938	0.453905	0.493853	0.539907	0.445926	0.495853	0.464882	0.924017	0.510859	0.442935	0.419025	0.489854	0.4559	0.476864	0.569004	0.582062	0.500854	0.524876	0.431972	0.464882	0.424999	0.438948	0.424004	0.522873	0.420021	0.401113	0.530887	0.423008	0.396142	0.42998
252	donor	18127.9	35086	56499.7	65165.1	55325.4	53661.9	64558.4	57137.2	46417.7	59616.2	41067.3	56737.3	28262.1	41774.7	53002	56156.7	49332	56536	52205.2	53153	60728	52031.9	45539.8	63795.1	60210.8	55025.3	47177.3	33406.6	32235.1	46186.6	59554.7	51813.8	51294.7	42651.6	50085.9	41314.3	50347.8	53929.3	60550.9	46015.1	54417.7	65611.5	51241.6	57305.8	34148.4	49059.8	55786.7	56218.2
252	acceptor	96312.2	75513.8	46174.2	43621.3	47955.4	56464.4	37003	42810.8	53855.8	45093.4	60926.9	50112.7	58603.4	64821.6	41639.6	40264.4	59525.7	46624.8	56253.4	51028.7	43310.9	50245.7	52020.2	50414.1	39351.2	51730.3	49926.6	65168.2	68786.8	53739.8	50218.3	48153.5	56237.6	50256.4	46147.6	42293.1	47159.9	47717.4	47651.3	57169.1	60266.4	44589.2	47682.9	44690.2	73791.9	54660.9	48412.1	50967.8
252	fret	0.841299	0.683078	0.449266	0.400589	0.464398	0.51257	0.364853	0.428021	0.53751	0.431058	0.596948	0.469434	0.674325	0.607782	0.440169	0.417873	0.546463	0.452295	0.518565	0.489536	0.415842	0.491542	0.533526	0.44118	0.395496	0.484516	0.514569	0.660686	0.681134	0.53751	0.457341	0.481503	0.522558	0.540496	0.479493	0.505569	0.483512	0.469434	0.440169	0.55441	0.525552	0.40466	0.482508	0.438145	0.684049	0.526549	0.464398	0.475471
253	donor	92349.5	80831.1	86201	96673.9	69165.1	70220	80616.8	57930.1	50876.6	79611.9	89172.8	81374	83864.9	78285.5	88501.3	75020.7	81333.6	104344	111052	93097.2	93945	112064	89458.6	108352	101337	94859.4	93190.1	72056	70855.8	86508.1	79011.8	74887.4	88891.8	88503.7	62552.2	81057.3	71355.9	60578.1	80023.8	80321.5	67350.5	95152.3	81269.3	79068.9	63573.8	80476.3	62083.1	90808.8
253	acceptor	34196	45616.3	42333.9	53069.7	56914.6	50367	41872.3	43116.7	65073.8	49289	48903.4	37226.9	41252.5	49211.5	41610.9	52833.4	36497.5	48295.4	42179.9	54806	34007.9	11240.1	41959.8	35788	50481.4	39270	37123.2	59178.3	69961.4	50799.9	44440.3	43183.4	37259.3	40398.5	56376	39589.2	48239.9	65272.6	51635.7	57738.6	62824.4	49937.6	44098.3	40586.5	47593.1	42285.5	45205.6	48018.6
253	fret	0.270115	0.36116	0.329816	0.354484	0.451671	0.417231	0.34212	0.427024	0.560944	0.382287	0.354484	0.313818	0.329816	0.386146	0.319453	0.413325	0.310069	0.316634	0.275651	0.370745	0.265511	0.0915448	0.319453	0.248088	0.33265	0.292335	0.284906	0.450681	0.496642	0.369786	0.360211	0.365952	0.295127	0.313818	0.473559	0.327929	0.403584	0.518906	0.391945	0.418209	0.482567	0.344018	0.351626	0.339275	0.428005	0.344018	0.421144	0.345918
254	donor	32194.7	30332.9	44352.2	34052.5	38772.8	26163.1	22842.6	22811.1	24142.1	27781.1	30753.6	34030.9	32493.5	25744.3	24570.7	35916.3	44297.2	41141.8	37656.1	40137.2	46377.2	41057.3	45468.9	43762.4	40084.1	22881.9	38894.7	20269.1	28766	29922	18478.1	17815.6	18780.9	26855.1	35051.2	25266.6	30639.6	28101.5	29835.5	24554.9	28074	42643.8	30305.4	29373.5	26123.8	30502	35979.2	33570.9
254	acceptor	21435.7	15056	2697.66	17944.8	12482.7	7401.84	17413.3	16061.8	23343.3	21671.9	15881.4	15887.7	29467.8	26063.2	25821.3	19813.8	3207.55	5964.16	3916.23	11905.3	-165.192	3899.51	13016.2	6698.15	2382.26	5734.27	3548.54	26830.8	10619	16947	12849	25378.6	15778	29974.4	19078.5	12600.3	15750	18736.9	7150.24	18329.2	5830.6	5365.1	-2950.31	14225.7	9382.61	3476.78	4685.92	4523.46
254	fret	0.39955	0.331165	0.0576222	0.344853	0.244091	0.220965	0.432122	0.412661	0.491162	0.438555	0.340303	0.318515	0.475557	0.503502	0.512704	0.355055	0.0670437	0.126412	0.0936829	0.228303	-0.00418906	0.0870616	0.22219	0.132883	0.0562721	0.199996	0.0830765	0.56971	0.269279	0.361799	0.410483	0.587267	0.456639	0.527917	0.352783	0.33231	0.339164	0.39955	0.193778	0.427833	0.172462	0.112088	-0.107793	0.326576	0.264511	0.10291	0.114701	0.118614
255	donor	52188.6	50262	46215.1	45462.2	51469.1	41444	56144.6	44489.3	40334.9	36909.5	46019.1	18092.7	19058.4	37533.4	23129.1	40067.2	44362.6	41695	21429.6	32102.5	43557.1	47527.4	134359	107186	89487.6	110955	98989.2	99323.9	95724	116104	86619.2	111510	141549	109763	98054.6	89317.9	92231.7	88273.3	94024.5	96634.7	85452.7	91452.5	102859	84585	83564.3	93259.6	99202	94500.2
255	acceptor	35993.4	48582.4	55830	48353.1	38752	50492.1	46965.3	52667	38630.1	49156.8	35722.1	64654.2	79510.1	55302.8	60202.8	41762.9	44619.4	52755.3	70925.6	60422.8	39270.2	33661.8	8468.18	14272.8	14858.8	12229.7	6179.36	6111.07	6777.22	-133.993	476.787	11366.6	11961.5	3648.23	9264.58	5259.63	5385.29	2595.64	-1953.16	-776.705	667.837	-3843.89	-3664.37	-8384.86	-1688.58	1254.07	-1739.45	6113.86
255	fret	0.407744	0.491225	0.547463	0.515271	0.429507	0.54948	0.455319	0.542426	0.489225	0.570704	0.437439	0.781444	0.806544	0.596054	0.722185	0.510254	0.501234	0.558571	0.767883	0.653187	0.474245
256	donor	26896.8	24614.7	27949.9	31135.1	23580	21280.2	27120.6	28231.7	26498.5	19756.5	28222.9	14566.5	1168.11	13117.7	8125.07	11928.7	18777.7	8385.58	14271.8	14871.5	9768.59	3945.16	7628.3	24130	26395.6	18402.5	1641	1397.39	-192.853	54.7954	-1066.24	856.899	1686.19	962.719	329.267	112.482	2566.56	-234.373	478.812	-1742.31	-323.292	1584.41	194.42	1552.08	505.635	11.8063	-157.212	1892.32
256	acceptor	73781.5	83945.4	89453.8	99670.7	86822.9	93249	86430.3	91904.3	80085.7	87575.4	86204.8	103094	98188.8	102255	114921	105328	100371	113546	102769	102095	107788	102636	116857	98162.4	125489	103886	3946.57	-1362.99	-2764.35	1897.4	-3560.42	863.026	-4195.24	1580.99	2332.47	3188.64	-1290.4	1350.37	308.998	234.324	-1090.13	-1775.99	1723.77	-1300.67	-4266	492.697	-2389.27	1366.5
256	fret	0.732909	0.773455	0.762039	0.762039	0.78634	0.813944	0.761219	0.765314	0.751319	0.816274	0.752976	0.876412	0.988512	0.88651	0.934191	0.897955	0.842287	0.931455	0.877832	0.872766	0.91695	0.963092	0.93896	0.802997	0.826304	0.849804
257	donor	1081.48	406.913	1429.45	885.525	-2198.99	-553.692	2101.2	4263.41	6446.45	2328.12	70.1942	870.323	883.273	2587.14	-2190.55	6986.43	5635.62	3824.77	11553.5	40019.7	76963	125672	132023	117850	111102	118377	113911	108546	124061	131815	127960	118047	115888	120377	115669	109809	121582	124711	122297	113462	112505	88883.3	-89.7193	-1393.8	-358.305	141.704	688.449	3189.06
257	acceptor	107956	109757	110101	120440	123235	117458	121667	123371	122362	130602	107081	110584	108559	107334	101456	110685	104597	106688	106954	77522.8	-2442.69	2560.09	-1928.35	-2880.04	2241.19	-4692.81	2823.65	-629.858	2067.34	-3320.58	-1143.15	-154.655	2406.56	-4527.27	91.567	1321.72	-2888.6	-298.943	-1312.79	-3229.33	-2187.98	-749.14	-2536.03	-498.392	-596.445	-5517.19	-2856.14	-683.682
257	fret	0.989838	0.996307	0.987064	0.992611	1.01843	1.00462	0.983363	0.96668	0.94995	0.982437	0.999077	0.992611	0.991687	0.97688	1.02211	0.940635	0.949019	0.965751	0.902295	0.659223
258	donor	19852.9	12766.1	20435.6	16613.6	21874.9	93794	138228	140165	148112	139377	140218	144757	138859	138616	136683	136336	134607	-786.044	-1968.44	-416.782	-398.839	362.35	-1037.25	-667.994	-1713.45	-3778.86	-2899.62	-278.9	-38.0768	-1053.31	-1660.56	-707.658	-1183.64	-726.547	-2437.8	-905.039	964.879	130.971	-231.68	-533.889	-314.787	-2008.1	624.893	-1133.58	-168.404	50.6971	-1332.85	-1057.09
258	acceptor	117707	124894	125246	119372	121603	62441.2	2820.88	4228.94	2829.77	2275.12	9703.63	7868.51	3937.62	2758.51	1803.72	1511.14	3250.07	3327.33	2141.07	1096.23	2557.59	-1716.38	2379.68	-2154.32	3254.83	7771.59	-4664.37	727.587	28.762	3841.63	3724.86	-364.875	1883.05	2942.11	50.617	-1658.91	-2082.7	2516.11	-3897.96	3179.87	3399.06	-2503.73	-1890.1	2275.47	-3941.61	-2395.52	5030.56	1655.27
258	fret	0.855425	0.907117	0.859845	0.877453	0.84745	0.399842
259	donor	75909.8	84618.3	78823.1	98855.7	118570	100734	101873	100334	100923	110690	113129	100383	104199	111038	110288	82616.7	88731.7	91947.8	103531	87960.7	91575.4	86157.6	103469	93393	104077	100521	113365	107317	130195	114641	119099	111213	126409	113389	114405	119806	117365	117888	107545	110670	118966	114146	111683	120056	120518	116689	121487	108062
259	acceptor	28616.7	24806.6	30213.3	16705	-1183.1	-48.209	764.684	-6124.51	-2606.39	5590.91	-2014.23	4084.61	990.141	-406.357	-1007.31	-2032.32	-433.075	2651.97	-799.726	-3447.55	-9865.76	567.517	-1878.82	-2527.12	1994	1845.72	173.374	1677.38	-2649.34	-1161.04	2844.34	-1419.61	1729.72	-5284.49	5861.64	166.576	-3611.61	-1360.37	-5077.13	328.62	-489.028	-2656.66	-450.876	-3363.03	-1479.51	-3126.41	3678.29	-487.626
259	fret	0.2736	0.226807	0.277306
260	donor	16250.7	24184.7	29499.6	30700.2	30655.9	8531.4	28701.9	30759.1	29584.8	4322.03	12866.9	27987.8	15469.5	31311.1	33843.3	41972.1	45717.9	29375.1	22681.1	35294.4	30749.3	28551.3	29660.1	24828.3	23696.6	17598.7	26163.2	23735.9	14213.2	11122.5	28208.9	31268.5	25768.5	29455.4	34365.7	26456.4	32198.8	36113.4	40322.7	41449.6	39227	43580.5	29118	34888.2	21383.9	23234.7	44409.3	30297.2
260	acceptor	44966.4	43300.8	34342.2	35675.4	32097.4	57806.4	36011.7	41745.4	34499.8	64689.2	44536	34159	50763.5	34535.6	35639.5	23946	41368.2	33899.5	36288.9	27383.3	35402.6	35998.8	33844.3	45245.7	46831.3	46032.2	46214.6	44584	54026.9	43262.1	36274.6	35623.9	42002.9	33608.4	32829.9	41494.1	44049.2	32169.5	41281	25545.3	18466	27920.5	29911.7	40702.9	47617.6	59243.4	21664.4	46293.7
260	fret	0.734618	0.641441	0.538007	0.537012	0.511027	0.871571	0.556836	0.575538	0.538007	0.937446	0.775902	0.549914	0.766781	0.52405	0.513034	0.363618	0.47464	0.536017	0.615475	0.436742	0.535022	0.557824	0.53303	0.645268	0.664324	0.723484	0.638567	0.652907	0.791337	0.795859	0.562756	0.53303	0.619328	0.53303	0.488847	0.610637	0.577499	0.471586	0.506001	0.381551	0.319904	0.391006	0.507007	0.538007	0.689838	0.717905	0.32741	0.604809
261	donor	68870.4	43879.7	53636.3	62439.1	60846.5	46921.4	65471.6	60154.2	57593	61827.8	61619.8	48276.5	55586.1	49073.8	56851	54904.9	61848.1	65018.6	59789.6	61883.1	70573.6	62341.5	64996.5	50565.1	71022.8	65300.3	62951	44723	41101.3	63107.5	57307.6	49909.7	58427.1	46960.1	65445.8	55985.7	67141.6	45588.4	52060.2	66618.6	46056	60391.7	47492.2	58436.3	40788.3	68949.6	48707.4	61750.5
261	acceptor	30576.9	27692.5	16114.8	22398.4	26882.2	35740.6	32423.9	41138	28614.7	23365.2	33066.1	32563.3	43772.5	41293.2	37134.2	21535.3	22352.4	28041.2	30093.3	27807	28426.2	26288.8	28999.3	31953.3	22378.7	31766.5	30668.8	38210.5	24593.6	29964.2	28166.2	32840.2	22914.6	25815.5	19373.6	26228	30990.5	31288.6	40742.7	40823	31763.3	37530.9	38142.9	42656.1	45171.7	8544.05	29727.7	25264
261	fret	0.30789	0.387158	0.230604	0.2639	0.306071	0.432685	0.330807	0.406379	0.33173	0.274562	0.349375	0.402517	0.44056	0.457417	0.394819	0.281702	0.265672	0.301532	0.334503	0.309712	0.287091	0.297005	0.308801	0.387158	0.239298	0.327118	0.328039	0.460409	0.374783	0.321601	0.329884	0.39674	0.281702	0.354988	0.227998	0.31885	0.316103	0.407346	0.438587	0.379532	0.408313	0.38334	0.4455	0.421918	0.525536	0.110511	0.378581	0.290689
262	donor	36354.5	51452.7	23816.4	48856.1	36744.8	24259.3	33228	39743.8	36665.9	21124.8	27834.7	47881.3	30370.6	31436.3	27723.5	26902.4	49456.7	36324.1	6526.11	5603.96	7148.97	3862.8	9603.99	3820.33	14101.5	51038.1	55250.5	41302.9	37391.9	50174.6	45992.6	48607.3	41236.2	62000.8	14146	50146.3	75349.7	53529.5	34107.7	14762.8	7763.74	7353.22	25776	13680.9	15998.4	11444.3	31844.8	32214.9
262	acceptor	42154.8	60586.6	74408.9	46650	58584.5	85242.4	44676.4	45628.7	42137.5	66925.6	53951.1	41358.7	69732.8	54683.6	26029.4	17615.3	28472.3	49159.6	87069.1	89587.9	87176.6	81189	92946.2	83097	77072.7	49562.5	41289.8	48575.7	67060.7	64221.4	57708.4	47518.4	44405.5	40969	83045.1	40883.3	22413.8	38869.7	54981.9	78447.7	85914.2	81462.2	69555.5	64292.8	85331	82660.4	55938.3	59162.8
262	fret	0.536965	0.540945	0.757328	0.487974	0.615028	0.778301	0.573667	0.533978	0.534974	0.760193	0.659966	0.463816	0.696806	0.634612	0.483955	0.395804	0.365078	0.574655	0.930221	0.941301	0.923747	0.954198	0.906133	0.956038	0.845424	0.492993	0.427377	0.540945	0.642426	0.561791	0.556835	0.493997	0.518021	0.397847	0.85481	0.448663	0.228849	0.420264	0.61699	0.841665	0.917265	0.917265	0.729554	0.824717	0.841665	0.878201	0.637544	0.647304
263	donor	74683.2	40806.6	33337.9	49755.1	58889.4	59590.4	53250.7	67993	56106.5	53410.7	41397.1	21594.8	49646.9	68393	47706.2	62836.6	72081.5	46438.2	83942.1	45224.4	78710.5	47863.8	42180.4	59477.4	80072.5	82464.9	65332.5	39846.9	48402.5	54179.9	56962.8	42641.5	39750.4	55071.5	50124.4	44739.8	47282.7	49336.4	43878.9	46177.1	32189.9	30510.3	19807	34278.8	52792	18520.2	31465.4	30522.1
263	acceptor	38886.7	54033.8	33585.5	35150.5	40831	22005.9	34328.1	37335.6	45616.1	40304.1	61710.2	44177.4	44645.4	46422.3	40479.9	25914.7	37818.7	48815.7	31295.1	52789.7	47210.6	44936.7	30705.8	42481.1	49861.5	37852.7	38115.8	40407.4	40089.5	44422.6	40991.1	53375.9	37723.2	50722	48240.5	33604	54814.3	30499.8	39508.6	35145.1	49472.3	33400.9	50869.5	45617.2	47761.6	51603.2	40257.4	45491.4
263	fret	0.342749	0.56927	0.501613	0.41414	0.409217	0.269524	0.391534	0.354412	0.448744	0.429929	0.598843	0.67199	0.473611	0.404299	0.458676	0.291567	0.34372	0.512657	0.271437	0.538856	0.374892	0.484593	0.421042	0.417097	0.383691	0.314677	0.368056	0.503619	0.452714	0.450729	0.418083	0.55607	0.486592	0.479598	0.490593	0.42894	0.53684	0.381738	0.473611	0.431906	0.606008	0.522719	0.71997	0.571304	0.474608	0.735713	0.561143	0.598843
[truncated: 462 more columns]

## Sheet: 242-363_intra_avitag
1	donor	47409	45683.3	45474.1	50997.8	54484.2	55426.9	48094	59078.6	27744.8	20007.8	21467.8	22062.2	25791	33553.1	29671.6	38008.3	47188.1	46553.3	27262.6	34065.8	31399.1	33431.9	45527.9	38578.4	38611.7	39729.5	34128.6	45844	34356.7	42490.5	40429.8	29756.9	27240.2	35615.5	54542.5	76783.6	71075	85217.3	84902.2	76860	81440.9	78690.7	80008.8	77145.5	86389.9	77730	75910	78137.6
1	acceptor	22490.5	30468.3	33233.3	21520.3	24619.3	16134.9	20169	12713.4	36450.4	41855.9	41783.5	40089.6	44552.9	37983.9	34646.5	31382.5	46800.8	35171.2	42215.8	45173.6	29885.6	43474.1	27137.3	40356.9	40073.3	33904.2	40232.7	34216.5	34342.3	26936.5	39456.1	44392.4	38122.2	37532.4	19148.5	2050.13	-8677.95	-853.854	-4734.84	840.929	-2745.94	-3273.11	-84.781	-1306.61	3642.59	535.043	-478.32	-5957.91
1	fret	0.321497	0.400521	0.421852	0.296879	0.311423	0.225196	0.295071	0.177456	0.567385	0.676834	0.661104	0.645509	0.633331	0.530619	0.538955	0.452372	0.497654	0.430656	0.607104	0.570573	0.487499	0.565263	0.37376	0.510979	0.508925	0.460338	0.541045	0.427716	0.499695	0.388043	0.493579	0.598441	0.58338	0.513036
2	donor	23282.1	27451.9	29540.6	28106.3	17851.3	22059	35053.8	29416	24199.7	17077.8	24119.6	22059	18524.1	31311.9	28646.9	29806	21219.5	19037.6	25816.1	37829.3	28970.8	40586.4	32419.1	23845.5	20571.6	29368.4	22661.4	19032.2	22282.2	23753.4	32852.4	36656	26561.4	28034.8	25865.9	25816.1	25644.9	31495	30697.6	26169.3	20870.6	34091.7	30300	26677.3	27124.8	27060.8	30223.1	33539.2
2	acceptor	37025.8	39832.8	39315.6	36923.7	50460.3	52074.8	48001.6	54310.3	37333.3	46341.3	42143.5	51009.4	31996.8	41837.6	34554.8	46058.3	47887.8	43267.8	43657.6	39786.9	36777.6	28407.6	30057.6	36541.4	37574	50650.2	35965.2	39651	39860.5	37533.8	33310.9	23332	30106.7	37798	36781.4	29174.6	26404.5	29376.8	34002.2	26498.8	28881.9	38531	36785.8	27831.6	30035	23395.3	28564.9	29225.7
2	fret	0.614339	0.591618	0.571306	0.56812	0.738221	0.702456	0.577696	0.648411	0.606734	0.731245	0.636248	0.697892	0.632926	0.572369	0.547024	0.606734	0.693338	0.694475	0.628531	0.512756	0.559651	0.411878	0.481163	0.60565	0.646194	0.632926	0.613251	0.675235	0.641767	0.612163	0.503525	0.388754	0.531365	0.574498	0.587323	0.530326	0.507621	0.482174	0.52514	0.503525	0.580899	0.530326	0.548073	0.5107	0.52514	0.464079	0.48622	0.46608
3	donor	40203.2	40032.4	52114.4	49411.8	37979.7	36055.1	38141	24806.5	24115.4	44337	40933.8	53485.5	33382.5	48179.9	42197.3	43396.1	69083.1	48325.3	41221.6	56578.8	80564.2	85857.2	87386.4	94137.5	94591.4	92548.2	87663.2	91232.4	88194.5	89037.4	94670.4	95503.8	81509.9	86162.4	92007.3	88392.2	89039	91278.3	80603.7	95323.6	91086.9	93242.4	93957.2	89163.9	88956.8	93895.5	91596.2	96035.2
3	acceptor	52620.7	50347.3	42590.4	38036.8	51595.9	48494.1	54143.6	61916.7	63021.2	46474.5	51971.8	38057.4	53257.6	43912.8	43851.8	51548.9	36295.1	36970.7	41921.1	36689.1	10874.6	-3185.31	-874.245	963.402	-1211.01	2026.79	2468.83	-1781.16	3428.47	-2538.65	-3151.85	1299.75	2844.89	-930.723	-4238.08	182.987	2618.99	2622.01	-180.362	-549.283	-1432.31	-3892.49	791.283	34.856	-529.534	932.666	-1566.14	73.526
3	fret	0.567351	0.557487	0.449828	0.434909	0.576183	0.573969	0.586193	0.713982	0.723866	0.5114	0.559672	0.415301	0.614416	0.477153	0.509297	0.543374	0.34453	0.433921	0.504055	0.393142
4	donor	40208.6	38858.1	42451.8	34472	37769.9	37787.4	42961.3	42085.3	37148.3	44493.8	88783.9	85354	91704.3	98287.5	100541	86361.9	92349.8	88951.6	79454.4	88958.8	89787.9	67954.8	80638	83866	79989.3	83559.2	81973.4	88241	78439.3	75210.5	85059.9	94863.2	84672.8	82454.3	88397.6	83517	80180.1	76999.8	79628.5	81316	79176.2	79180.9	71503.2	2857.09	1750.61	4070.87	1563.81	1411.99
4	acceptor	40717.5	40740	42711.3	48874.3	48308.9	49944.1	38994.6	47265.6	50166.1	40988.2	-4108.52	2169.56	3082.5	-2737.18	-1829.7	814.37	3491	-2646.76	4174.73	2356.53	673.788	-3150.09	-3074.33	8609	879.574	355.384	6110.58	4196.12	207.876	1613.92	16.605	-2538.91	-3529.43	-3349.89	-1911.79	2425.74	-1792.48	-1454.43	1789.86	-2169.02	-12.52	8565.56	454.787	-514.611	-234.085	1174.84	-2586.56	745.952
4	fret	0.503194	0.512292	0.501176	0.586159	0.561321	0.569576	0.476076	0.52853	0.574748
5	donor	96473.8	96635.1	86325.3	82206.2	86211.7	83029.5	93472.5	88210.3	98974.5	95306.9	87826	88750.2	93004	95629.5	87663.3	88884.9	91271.9	79059	86378.6	87963.4	76481.2	78852.8	89948	85908.8	85039.2	97696.8	97162.4	67401.4	77519	92605.7	73390.1	91403.8	81900.4	73569.6	66408.4	79167	97257.8	94956.3	101308	103315	88891.9	73426.5	86594.6	82607.3	85521.7	78879.5	74628.5	64927.4
5	acceptor	6023.37	6843.53	11357.8	16389.8	21477.4	10051.3	6367.62	10442.7	13708.5	8178.61	8586.29	11272.2	8812.96	10116.7	10582.8	14963.7	4645.46	14562.1	23935.5	26703.8	24519.3	22222.5	13973.2	16817.6	16808.6	8588.11	16190.4	28500.7	20332.9	16008.8	16749.8	12517.4	20863.4	26940.5	26136.2	21135.8	21380	17490.4	15556.1	17879	32314.3	29820.2	16629.3	20909.8	17945.9	25024.9	25148.6	32493.2
5	fret	0.0586256	0.0659604	0.11639	0.166568	0.199388	0.107826	0.0635063	0.105865	0.121714	0.0789971	0.0891054	0.112424	0.0865639	0.0955019	0.107826	0.144124	0.0483742	0.155256	0.216759	0.232989	0.242426	0.219823	0.134527	0.163723	0.165144	0.0808807	0.142745	0.297417	0.207644	0.147583	0.186078	0.120379	0.203129	0.268193	0.282248	0.21067	0.180232	0.155256	0.133167	0.147583	0.266556	0.288953	0.160889	0.20163	0.173732	0.240845	0.251985	0.333122
6	donor	21425.5	35233.1	28041.3	26019.5	26547.9	27773.4	25634.2	32492.1	35357.8	26874.4	40927.8	34007.5	27725.7	33248	37375.9	17572.8	27637.6	32734.3	26896.4	48460.9	31541.8	25505.8	18038.8	42751.4	45756.6	29105.4	33908.5	32367.4	22493.3	29942	26474.5	29505.3	24159.1	21609	26015.8	44809.9	25861.7	25421.4	30400.6	28066.9	54111.6	46090.5	26225	42784.5	40674.6	27421.1	32169.2	38109.8
6	acceptor	18262.9	25180.8	21049.3	23202.3	21205	18498.4	19612.8	9184.13	17084.2	24054.6	14828.1	12498.2	20230.2	14250.5	9525.62	22365.4	13505.8	23784.3	25132.3	9859.67	18116.2	10454.1	22378.1	10440.6	17965.7	16501.5	21603.5	16527	17265.7	16552.4	20704.9	37746.3	34681.8	24176.4	24201	22005.2	24704.1	23062.2	18092	14781.5	26744.3	19002.9	30341.4	19179.1	18958.5	16637.2	15974.7	18089.6
6	fret	0.460273	0.416331	0.429118	0.47156	0.444052	0.399852	0.433085	0.220463	0.325791	0.472592	0.266188	0.268702	0.422213	0.300282	0.203108	0.559765	0.328469	0.42123	0.482971	0.169373	0.364902	0.290782	0.554172	0.196095	0.282228	0.362122	0.389332	0.338352	0.434079	0.355665	0.439064	0.560887	0.589325	0.527724	0.481928	0.329363	0.4882	0.475695	0.373291	0.344695	0.331154	0.291642	0.536467	0.309878	0.317801	0.377982	0.332051	0.322232
7	donor	59480.8	64333.6	62812.5	49971.7	50577.3	50931.9	46123.7	53849.9	44811.3	40374.6	35837.8	40403.5	54350.5	64708.8	45381.8	47760.6	59609.9	46614.6	44447	54301	53594.2	55588.1	41246.7	76357.8	67582.1	50046.5	29966.8	51281.7	37217.7	53550.7	47771.5	56726.9	60761.8	52141.8	55619.5	62270.9	42572.4	57128.5	59865.6	52614.7	46451.8	46453	49701.5	48354.1	48064.6	37182.8	71297.5	58514.6
7	acceptor	25837	18221.7	11483.4	13358.1	6246	7826.12	26599.4	9161.4	18689.1	13966.6	34456.4	28263.2	12620.1	14905.1	18653.7	19051.6	11722	8454.15	14441.9	20075.6	16282.3	15269.8	36652	15758.7	5617.74	17837.5	27045.7	13180.8	27477.2	23619.9	16222.5	22690	16828.5	14441.5	14606.2	6938.14	20797.8	17939.7	17844.9	23426.6	19469.3	14584.4	17215.4	18244.6	19977.9	32944.4	13890.2	16353.2
7	fret	0.30295	0.220526	0.154509	0.211049	0.109562	0.133102	0.365943	0.145416	0.293885	0.257233	0.490276	0.411878	0.188021	0.187175	0.291175	0.284862	0.164488	0.15368	0.244905	0.269656	0.232669	0.21535	0.470089	0.171176	0.0768876	0.262546	0.474108	0.204191	0.424535	0.305679	0.253701	0.285761	0.217073	0.217073	0.207616	0.0999292	0.3286	0.238776	0.230053	0.308413	0.295694	0.238776	0.257233	0.274116	0.293885	0.470089	0.162821	0.218799
8	donor	25377.4	26485.3	31091	27383.4	18696.6	24860.5	22857	31886.7	29883.3	19372.1	18576.3	24405.1	30991.2	22816.1	28432.5	15810.3	18553.3	16821	26247.3	21286	17982.7	28813.7	23000.3	24535.5	30581.8	22921	22409.3	27826.1	23908.7	18850.1	27217.1	27322	25669.1	28864.9	16224.8	22347.8	23499.3	18824.5	16900.3	19185.3	22654.9	21506	18473.9	24451.1	24737.7	21787.5	27567.6	23686.1
8	acceptor	27845.4	26173.1	31597.8	37117.2	44903.8	37226.3	34693.3	35310	30891.8	37224.4	32165.3	35174.2	28578.7	44884.8	29422.1	36922.4	37362.6	39318.4	35445.8	32923.5	28833.4	27215.6	30166.7	35953.2	27428.3	22752.4	32472.9	28560.3	34373.4	26151	41316.1	32323.9	20818.8	28616.1	35980.1	25798.6	31148.2	31917.3	42356.3	37985.3	31017.6	28372.7	37596.2	20481.7	26680.5	31943.3	22989.7	37716.9
8	fret	0.523207	0.496964	0.50401	0.575357	0.705823	0.599156	0.603313	0.525236	0.508043	0.657848	0.633618	0.590858	0.479917	0.663142	0.509053	0.700458	0.668456	0.700458	0.574326	0.607476	0.615818	0.485923	0.56712	0.593967	0.472925	0.497969	0.591894	0.506026	0.589822	0.581548	0.603313	0.54152	0.448081	0.497969	0.688687	0.535407	0.570207	0.629421	0.714425	0.664213	0.577419	0.569178	0.670579	0.45601	0.519163	0.595004	0.455018	0.614774
9	donor	21721.4	26879.9	19910.6	22243	26580.4	24244.2	29397.5	22309	19849.7	27113.3	23015.8	22913	17041.4	18667	13259.8	14367.7	22207.4	31000.2	24706.1	22729	22670.6	18394.1	21731.6	13849.9	26989	26915.4	24863.4	11320.8	24680.7	22065.3	18357.3	19936	21012.1	22177	26208.6	22039.9	11705.3	23377.4	16451.3	20575.5	16038.9	21513.3	20172	22298.8	30544.7	18254.6	21026	25638.8
9	acceptor	32522.1	30120.6	36568.3	29891.8	29317.7	22635.9	26963.3	24311.1	42567.3	31801.1	39366.9	26065.7	30999.5	33458.5	27502.4	37434.1	28729.8	34973.7	28402.9	30807.4	28824.2	25995	30933.7	41562.8	28576.2	23991	41274.7	24349.8	26160.1	33124.8	27801.7	34165.8	31857.1	26706.3	27297.6	35137.6	44868.6	36831.4	40536.2	36449.6	29702	31855.1	42175.4	37591	29978.5	39208.9	39388.3	35389.6
9	fret	0.599213	0.528682	0.647885	0.572954	0.524668	0.482622	0.478627	0.521659	0.681489	0.539731	0.630618	0.531694	0.644835	0.641787	0.674354	0.722392	0.563881	0.529686	0.534707	0.574971	0.559849	0.586074	0.587084	0.750099	0.51464	0.471641	0.624531	0.68251	0.51464	0.600224	0.602247	0.631633	0.602247	0.546768	0.510632	0.614396	0.79336	0.611357	0.711127	0.638739	0.648901	0.59719	0.676389	0.627574	0.495616	0.68251	0.651952	0.580016
10	donor	67878.5	58744.6	66137.9	63399.8	90536.8	61148.4	91681.2	76619.4	65009.5	67466.8	62201.9	67966.8	65899.9	53795.3	57153.7	61926.5	52308.7	65258.2	58386.3	65172.6	62084.3	71400	63287.5	70819.8	71354.6	57538.7	60533.5	52573.4	39733.5	48049.2	60846.3	51856.8	72798.4	66600.4	81702.4	45043.8	83416.3	70234.2	67119.2	61565.6	54790	58792.8	51370.1	52207.1	65357.1	51907.6	70774.3	54656.3
10	acceptor	26009.9	13499.2	18150.5	21142.1	18186	25672.5	14501.9	11500.6	19587.7	20194.4	22547.5	20722.5	19076.1	19672.2	17314.1	20448.2	23007.7	12053.6	27559.9	19604.3	10551.7	23134.2	18292.1	20401.1	17885.1	25325.9	29784.2	27467.9	15043.5	23694.4	17765	18915.3	17686.2	17713.2	16312.7	10801.9	15721.5	15650	4451.31	19541.7	27443.5	26621.7	18100.2	18675.9	21825.5	16973.3	11708.3	21390.9
10	fret	0.277326	0.186861	0.215571	0.249771	0.167486	0.295377	0.136372	0.130259	0.231653	0.230171	0.266137	0.233885	0.224282	0.267722	0.232396	0.248237	0.305473	0.155827	0.320961	0.230912	0.145062	0.244423	0.224282	0.223551	0.200666	0.305473	0.329748	0.343184	0.27491	0.330635	0.225748	0.266929	0.195779	0.209842	0.166177	0.193704	0.158394	0.182116	0.061971	0.240635	0.333301	0.311446	0.260627	0.263769	0.250539	0.246708	0.141941	0.281378
11	donor	46666.7	49134.5	54656.8	46222.5	43758.6	52691.1	44565.1	43313.4	46155	51026.9	41582.8	47793.1	39979.4	32521.2	45574.9	46189.7	42085.8	41730.2	47334.5	45043	41954.7	47162.9	49387.9	44155.6	39972.6	48431	43044.6	44203.8	44039.9	45107.6	64641.5	107393	6071.58	-1449.25	-1267.13	1292.17	254.381	2698.05	-1090.79	368.083	-1914.66	-4049.02	-2018.73	3943.01	5054.03	1045.49	981.892	-861.459
11	acceptor	61720.3	59528.7	50762	57079.5	51486.5	54074.5	47948.5	49904.3	45587.5	43443.2	58258	57531.5	55244	56244.5	51594.8	47546.7	50254.4	55056	49762.8	50713.6	51034.5	54025.5	42438	52506.7	50553.9	45465.9	42904.5	44465.3	45453.5	47285.2	21405.8	-1074.16	3188.59	228.545	-2245.13	2759.88	-7502.41	1767.6	-116.123	-1207.2	264.716	1785.48	-645.123	1495.26	-4324.7	3700.23	2082.62	450.549
11	fret	0.569929	0.548117	0.481891	0.552256	0.540892	0.50612	0.51832	0.535745	0.497004	0.459906	0.583535	0.54605	0.580388	0.633405	0.53061	0.507135	0.543986	0.568885	0.512206	0.529584	0.549151	0.53369	0.461895	0.542954	0.558478	0.4839	0.499026	0.501051	0.508139	0.512206
12	donor	14229.8	16639.8	12190.2	13683.7	14056	15662.7	19797.5	12858.5	14138.5	17138.3	12505	19072.6	16437.2	13853.5	15649.8	16124.4	15172.2	11027.5	18318.9	16384.6	16685.5	14171.2	13382.8	15167.2	12394.8	14918	14498.9	11585.5	15039.1	14497.9	13800.9	19540.3	32110.4	33972.3	37933.2	41604.3	41728.4	39992.7	41497.1	35782.5	35962.2	36744.7	46483.8	44867.2	37603.6	40233	39081.1	36482.5
12	acceptor	34658.2	27633.3	24268.7	29662.1	16239.6	25407.3	23358	23978.1	19019.5	32258.5	22039.3	20342.1	20748.7	24744.5	19185.8	15469.8	24954	21566.7	28455.1	23823.4	24091.6	20451.1	21478.8	17880.5	20696.3	22430.9	27069.1	26125.7	23672.9	32503.6	23784.8	11895.1	-1772.12	3241.33	5231.97	-4969.37	-964.938	-189.198	-538.852	210.697	4865.43	-1349.41	-6460.49	973.281	198.233	3298.16	-2375.68	978.482
12	fret	0.709068	0.624109	0.665376	0.683995	0.536523	0.618461	0.541669	0.650922	0.573948	0.652742	0.638078	0.515657	0.557948	0.640846	0.550861	0.490002	0.62223	0.661785	0.608012	0.592597	0.590651	0.590651	0.61657	0.540671	0.625047	0.600337	0.650922	0.692757	0.611825	0.691889	0.632517
13	donor	51764.6	57416.1	49970.5	55731.6	52137.9	66195.2	62445.5	60666.3	56422.5	50460.8	63816.1	51632.7	57379	57748.6	52292	52656.1	58214.7	62627.5	73596.3	55226.5	62751.9	60203.8	55259.9	56049.2	58446.9	59581.6	58513.7	63385.2	60605	56130.9	62425.1	52982.9	66732	64393.7	58029	69120.4	61620.9	55376.9	65638.1	58394.9	54804.9	57263.8	62020.2	75921.5	82522.1	79974	85900.4	75674.5
13	acceptor	19017.8	19611.8	19008.4	14830.9	22615.7	14220.1	6519	14152.9	18085.4	13676.3	19216.4	21732.8	17118.4	14348.9	14506.1	19075.9	23227.3	13659.2	12601.7	13034.2	15966.5	14728.4	19091.9	16484.7	16920.5	7864.66	9694.25	17371.4	12483.3	19727.4	11935.6	14274.6	16192	13166	15503.6	10720.5	9840.01	17984.3	11379.7	11332.6	13597.1	13742	1859.76	-3455.37	1165.91	-1715.68	-5535.33	94.455
13	fret	0.268288	0.254709	0.275566	0.210088	0.302169	0.176819	0.0943212	0.189012	0.243013	0.213622	0.231384	0.29663	0.229601	0.198645	0.217162	0.265565	0.285617	0.179426	0.145801	0.19076	0.203038	0.19689	0.256514	0.226929	0.22426	0.11694	0.142381	0.215391	0.17075	0.26013	0.160389	0.211854	0.195137	0.169885	0.21097	0.133868	0.138122	0.244808	0.147512
14	donor	17426.7	26562.8	28863.5	30760.2	42867.6	42747.3	44723.8	23646.4	6689.25	25545.8	37271.4	38041.4	37987.8	36823.1	34326.3	53751.4	41572.2	25211.1	16702.5	50503	37849.2	38559	23437.2	30843.9	30913.2	40653.2	37921.1	47076.8	37949.9	38076.7	32611.2	32208.6	32684.4	18958.7	12244.9	5606.88	6768.99	8899.74	29890.9	46568.3	37910.7	40127.7	49631.1	38961.7	37502.8	41600.9	34144.6	46493.8
14	acceptor	44923.3	36278.5	31806.4	36646.6	22882.8	29875.1	28083.6	34943.4	52849.8	50971.2	24796.9	17189.5	27110.9	30632.4	14434.8	4204.32	17650.5	35559.7	49427.8	22931.3	22245.6	34195.1	23500.8	31198.3	19058.7	15485.9	20405.8	10719.5	19442.8	18148.6	41008.9	18511.3	19101.2	38168.5	46596.2	51725.7	58280.9	44575.9	25550.1	20146	29975.1	23529.3	17802.7	23047.4	26262.6	25540.6	23325.9	15093.7
14	fret	0.720338	0.577442	0.524574	0.543543	0.347953	0.411364	0.386226	0.596357	0.887654	0.665886	0.399302	0.311623	0.416387	0.454523	0.296465	0.0727576	0.298487	0.585408	0.747011	0.312633	0.37012	0.469556	0.500586	0.502586	0.381194	0.276236	0.34997	0.185955	0.338877	0.322731	0.557508	0.365084	0.369113	0.667869	0.792368	0.902346	0.895491	0.833685	0.460538	0.301519	0.441485	0.37012	0.264088	0.372134	0.411364	0.380188	0.406339	0.244838
15	donor	22768.4	25232.2	24273.4	26636.2	29757.2	22809.1	22483	21494.9	19275.6	28395.6	27143.3	30662.2	26766.7	31185.6	21263.3	29589.3	22266.1	28188.6	24389.2	25827.4	24943.6	29111.5	23061.9	20571.9	22238.4	22722.7	24655	24540.9	24490.3	35969.9	34199	25423	25714.9	23492.4	23089.6	23105.9	25255.1	21555.2	30649.2	40966.1	57159.8	57274	40804.7	59165.5	52391.9	62203.3	54125.2	55203.1
15	acceptor	48991.6	47592.1	44099.5	36101.6	44779.9	37814.6	47722.4	40879.4	40293.2	42045.1	39762.9	41494.1	38904.4	42849	43496.8	44481.1	46629.8	40576.3	43775.7	38399	43627.1	39481	38186.3	47901.7	36320.5	34124.3	31469.6	37284.9	42704.2	35956.6	33927.7	42300.3	40929.4	39051.3	41956.6	34952.1	38271.6	40589.8	37954.5	18999.8	3388.09	-640.078	2721.1	302.457	1800.45	-4314.99	1287.13	3542.47
15	fret	0.682765	0.654006	0.644494	0.575555	0.600443	0.623438	0.679558	0.655066	0.676353	0.597321	0.594202	0.575555	0.592124	0.578654	0.672086	0.600443	0.676353	0.590048	0.642382	0.598361	0.636054	0.575555	0.623438	0.699929	0.620292	0.600443	0.561131	0.603568	0.636054	0.500086	0.498072	0.624487	0.61401	0.624487	0.645551	0.602526	0.602526	0.652946	0.552919
16	donor	32990.7	27249.6	32129	28810.9	32327.1	30506	31532.3	28335.1	31967	32059.6	36676.6	39490.6	33438.3	38623.8	28409.7	38500.3	33271.1	33996.4	37970.4	29454	35568	36594.3	38816.7	34773.2	34323.1	29971	32357.9	34665.2	36105.6	38145.3	36807.8	38618.6	38749.8	39711.8	30295.1	32267.9	33170.8	19978.1	31866.7	35439.4	32635.7	37317.1	35210.5	44007.3	25418.2	42260.8	44092.2	40920.7
16	acceptor	28233.3	35964.2	27593.9	39272.7	38138.7	33321.5	43282.4	35105.8	35068.2	30111.4	18744.2	32018.8	37553.4	39177.5	31833.2	31849.6	28522.3	34587.3	43794.8	37157.9	39088.1	45001.3	32830.6	38249.5	41587.1	40051.4	40645.6	38455.4	33874.2	38153.8	49585.2	36646.2	32862.6	33482.2	37780.8	35753.4	42358.3	39035	31697.2	39489.1	33365	33178.6	37798.8	22024.1	44483.3	46111.5	30277.7	37276.9
16	fret	0.461505	0.569428	0.462507	0.576971	0.541729	0.521796	0.578051	0.553387	0.522839	0.484709	0.338506	0.447544	0.52911	0.503148	0.528063	0.452515	0.461505	0.504178	0.535406	0.557649	0.523882	0.551261	0.458503	0.523882	0.548077	0.571579	0.556582	0.525971	0.483692	0.500062	0.573734	0.486744	0.458503	0.457503	0.554452	0.525971	0.560852	0.66127	0.499035	0.527017	0.505209	0.470549	0.517632	0.333905	0.636404	0.521796	0.407394	0.476608
17	donor	35622.9	38024.4	30631.6	33851.3	36235.1	34976.5	33873.8	37583	34975.5	33299.9	32060.9	35313.9	31182	32371.9	32696.6	31586.1	34921.5	52882.7	83664.5	86368.1	79902.3	89048.2	86518.2	86623.2	88223.2	81246.3	91889.2	85341	52416.7	-1659.97	-1203.8	1755.87	483.517	-1918.95	-179.639	1243.79	-2305.47	-649.538	-274.796	2828.11	-330.713	-287.549	-354.257	-789.821	746.425	2098.24	-2157.33	848.449
17	acceptor	47466.5	45737.7	52755.2	55192.4	50487.8	46343.6	46674.8	57727.7	54571.7	50499.3	46069.7	52002.1	49311.4	43972.5	41548.3	46757.6	48114.1	20410.4	1347.47	3506.55	-269.078	999.812	3441.34	1137.35	-1279.82	2568.52	5222.59	-2694.16	-1470.82	-2875.64	-348.188	1767.62	-4954.59	-342.158	768.732	-320.838	926.422	-836.238	-1533.98	-650.388	408.012	-405.568	45.692	1301.77	-1813.35	1859.19	-375.648	-2315.13
17	fret	0.571704	0.54576	0.63247	0.619532	0.582672	0.56971	0.579681	0.605591	0.609575	0.602603	0.589649	0.595629	0.612562	0.575694	0.559733	0.596625	0.579681
18	donor	20678.9	21606.1	21167	21403.4	19567.3	19767	16493.3	19767	17665.1	22017.7	24729	5427.22	1547.3	2417.43	5471.03	2121.95	414.298	-477.227	-1287.24	3408.81	1503.49	2320.63	2142.33	4897.4	7034	3069.52	2203.46	3504.58	12909.9	55410.7	63504.8	61639.2	66761.1	62901.6	70141.8	63604.6	63973.5	62990.2	64937.3	62383	48714.6	54135.1	54346	53657.2	55100	60693.7	54177.9	58159.7
18	acceptor	47092.4	45652.9	46688.7	39393.6	48278.7	49782.3	40447.4	55556	39012.6	44298.5	44180.2	60194.1	72142.9	61376.4	47083.3	63455.7	64834.6	71096.3	60408.2	62710.3	55946.5	62760.1	58566.8	71574.9	70189.8	73984.1	68781.1	65107.1	47882.7	919.374	2168.67	-2601.53	926.278	1514.4	-408.029	1122.11	-1378.16	-6234.8	560.258	-519.327	-1506.98	-3975.02	1617.73	1203.85	-2446.46	292.508	57.162	-1464.55
18	fret	0.695144	0.678671	0.688367	0.64753	0.711575	0.715432	0.71061	0.737554	0.688367	0.667986	0.640694	0.917015	0.978914	0.962354	0.895602	0.967879	0.993591	1.00641	1.02192	0.948515	0.973399	0.964196	0.965117	0.935567	0.908646	0.960511	0.9688	0.948515	0.787257
19	donor	58720.6	50770.1	43421.2	37337.8	46641.5	46056.3	39332	32369.1	47543.2	52465.9	56381.4	45844.9	46826	37582.9	42240.1	50828.3	38991.8	44207.2	36230.4	36994.4	35757.5	38586.1	42882.7	54977.3	34819.8	38772.2	40695.9	44053.9	35356.7	37250.9	34205.1	38413.2	39191	40922.1	39862.3	28766.8	45764.5	42199.9	43847.4	44895.7	51284.8	37378.8	46146.5	37707.4	44388.4	68368.6	64858.9	82862.4
19	acceptor	20689.7	33162.2	33103.7	34445.2	37307	32623.4	36064.9	44681.9	31482.6	26670.2	21924.5	37234.1	24781.8	37527.7	38731.3	29467.8	25846.1	28969.6	41913.4	35344.6	36935.1	30934.4	30080.2	24373.7	38235.7	29000.1	37031.2	36429.6	33287.5	33048.5	35791.6	37148.3	37789.2	29008.8	37804.2	37895	35544.4	39091.6	30293.6	28780.9	27997.9	37368.3	36664.8	41821.1	36878.6	2549.51	-872.502	740.343
19	fret	0.260244	0.395497	0.432391	0.480208	0.444216	0.414811	0.478188	0.580136	0.398379	0.337036	0.279758	0.448177	0.346331	0.499521	0.478188	0.366949	0.398379	0.395497	0.536736	0.488298	0.50772	0.445205	0.411899	0.306784	0.523202	0.427489	0.47617	0.452147	0.485269	0.470132	0.511835	0.491347	0.491347	0.414811	0.486283	0.568384	0.437308	0.481219	0.408993	0.390704	0.352863	0.499521	0.443228	0.526316	0.454136
20	donor	29965.3	23285.8	19947.1	14912.3	17025.8	19695.1	21860.3	18203.4	25632.8	7906.38	20277.7	26779.5	31413.6	20060.8	17058.9	19186.9	19521.5	23622.6	19366.6	16908	18907.9	33657.3	21858.2	27172	29971.5	32147	27469.5	35303.9	15191.2	25920	17445.2	15077.5	15247	18926.5	27653.4	21808.6	23649.5	15746.9	13904	22484.2	28436.4	22230.1	14009.4	18135.2	20639.3	23044.1	28698.8	25089.5
20	acceptor	31087	30514.2	35391.5	47871.1	40205.3	40042.3	34245.2	30193.7	39631.8	32111.2	26257.2	27887.3	22006.6	31657.9	37614.3	35376.4	33965.5	24077.8	27947.4	37706.4	35998.2	21119.3	34411.9	25263.9	26192.2	36855	31089.7	27556.3	31696.9	35036.2	21060	26521.2	38102.4	31105.3	25158.4	36940.5	25662.6	29511.5	29279.8	24355.5	31156.1	17691.9	26985.5	32200.4	28919.5	30187.6	29504	36067.7
20	fret	0.5095	0.56668	0.639775	0.76284	0.702829	0.670599	0.610317	0.623957	0.607178	0.80278	0.564618	0.510512	0.412102	0.612411	0.687745	0.648246	0.635548	0.50445	0.590495	0.689895	0.655666	0.385846	0.611364	0.481331	0.466354	0.533867	0.53081	0.438605	0.675947	0.574941	0.547152	0.637661	0.714735	0.621854	0.47633	0.62922	0.520634	0.652479	0.678088	0.519619	0.522664	0.443541	0.657793	0.639775	0.583226	0.56668	0.506469	0.589456
21	donor	22344.6	26313.6	30745.3	21397.4	17136.2	22576	29118.7	24869.7	29980.7	22695.3	24567.8	23515.8	20545.2	11063.5	28305.4	20148.3	14367.7	30930.3	25378.6	22149.8	32790.6	30353.2	29067.6	31385.6	28366.3	24784.5	29525.3	23871.4	26807.9	27760	31909.2	25824.2	35573.8	22468.8	24716.3	24945.2	30014.8	29432.8	24726	29632.5	26260.1	24029.6	22500.5	16948.8	31785	27516.5	23718	30608.9
21	acceptor	41331.1	36593.3	40741.6	43833.7	34648.9	39155.7	33742	37680.4	27513.2	39660.1	35098.2	30412.8	33351.8	41134.3	39255.9	44821.8	38686.8	43689.8	36196.2	35637	44590	33813	30932.2	36013.7	41213	34149.7	43202.6	29029	37216	35227.1	37917.5	33524.8	32223.4	40439.5	39133.6	30983	32077.3	38851.6	35598.5	30494.6	41218.9	42059.8	33358.1	45428.6	39697.8	45105.9	41711.8	36628.8
21	fret	0.648636	0.581194	0.569632	0.67159	0.669394	0.63453	0.53635	0.602377	0.478333	0.635611	0.588584	0.564398	0.618401	0.787778	0.581194	0.690351	0.729487	0.585414	0.587527	0.616258	0.575931	0.527083	0.515811	0.534287	0.592819	0.579087	0.593878	0.54877	0.581194	0.559176	0.542551	0.564398	0.475323	0.64319	0.613047	0.553966	0.516833	0.568584	0.589642	0.507638	0.610908	0.636692	0.597061	0.728359	0.555007	0.621621	0.637773	0.544622
22	donor	64356.1	55187.3	49740.7	56487.9	52170.1	48725.2	57591.3	53541	51801	58433	49070.8	67801	72636.3	102605	110774	104304	118676	108374	109148	108312	108652	109190	108587	109632	110614	113897	110186	116645	122001	99010.1	116242	118707	108091	116043	116973	108569	102953	102514	100205	101086	102092	94969.6	106966	101869	107298	99326.5	110352	110558
22	acceptor	45744.8	45403.7	49105.5	50920.9	46015.3	59122.4	58712.5	51926	54820.3	48792.6	54191.3	54566.1	31989.4	1314.57	-961.121	5478.67	262.847	-579.366	-2018.64	-3794.2	-2231.23	2701.96	-4875.77	581.47	-2048.05	1642.84	2998.62	-5106.72	1450.4	-131.69	1902.48	-1116.88	-4991.74	-2430.71	-3874.11	-5327.75	3794.15	1254.85	-5082.55	-2617.4	-3238.35	-3122.27	4169.76	949.32	-2352.38	2267.3	-3932.24	-1059.68
22	fret	0.415411	0.451788	0.496795	0.473685	0.468691	0.547816	0.504886	0.49276	0.51401	0.454762	0.525234	0.445851
23	donor	57507.9	55245.9	48027.7	56769.8	53579.4	48255.1	50630.9	48666.6	59019.4	55049.5	49518.5	50091.2	49177.3	114493	105724	82330.3	-878.789	8345.06	5214.62	3649.4	1029.67	1809.18	3546.01	2851.28	-1277.85	-876.721	-3254.54	2675.53	2621.77	4368.95	-80.671	-2952.66	1279.85	-2384.05	-2034.61	-2102.85	-3357.92	1315	1184.74	-5547.58	-4488.93	-2249.65	-2931.98	446.584	-2069.76	-965.631	4288.31	5746.01
23	acceptor	56087	58822.9	46489.6	58385.6	48599.4	56264.1	50573	48264.2	39272.4	52753	55939.6	49614.7	47660	8067.37	-185.405	1170.16	-103.625	628.574	-3280.65	363.915	731.608	4474.35	-671.12	-2728.54	-1670.3	3097.02	689.557	707.888	1951.4	2279.59	5088.97	3241.7	-625.749	-1566.31	1236.48	-2752.93	-423.662	926.876	345.199	1189.49	3636.24	3462.06	-594.968	108.23	-1089.56	-108.508	1954.5	828.232
23	fret	0.493338	0.516028	0.492271	0.50732	0.475362	0.538152	0.499766	0.497619	0.399984	0.489078	0.530351	0.497619	0.492271
24	donor	17967	16834.5	19189.7	16539.4	13710.6	13045.8	15884.9	16967.1	8962.3	11565.9	14292.6	13409.1	19979.1	17863.3	13856.6	16844.4	17619.6	26477.9	38400	36384.8	32342	31135.2	37638.3	35834.8	32997.7	37309.9	33279.4	35818.9	35737.4	37020.3	35130.4	28984.6	33956	35794.8	39319.2	34484.3	35823.7	31561.3	35737	33746.7	38198.2	32806.2	33975	35682.8	34373.9	34176.8	34826.6	31558.2
24	acceptor	25976.8	25305	26114.2	30862.4	30369.6	28872.6	36619.8	26588.5	35350.2	39762.8	29896.7	38358.3	35237.9	35059	29596.5	24204.1	28533.4	8038.48	-1644.68	-1496.76	-4773.32	1196.25	-4349.34	221.855	2666.28	-1222.7	3324.6	2974.6	-316.899	-1619.5	-4763.46	2549.41	-2611.18	-2127.74	1093.99	1827.17	1567.8	-3526.52	-5246.65	907.962	2837.11	-688.369	287.803	550.893	-6301.1	-2368.15	995.246	3577.4
24	fret	0.591452	0.600133	0.576822	0.650759	0.689362	0.68848	0.697258	0.610648	0.797709	0.774562	0.676984	0.74086	0.63787	0.662585	0.681403	0.589513
25	donor	44379.9	45145.7	46028.7	47158.4	39512.5	107054	100947	100782	89812.9	106001	101677	102678	107002	104006	103888	111709	104899	112390	106589	107581	98207.6	109173	113309	108717	102751	108654	102618	109312	109610	104571	105011	71312.8	-3321.22	983.412	-1874.76	-3382.54	-2367.36	-1923.81	2036.06	945.258	54.0805	-463.729	-1479.59	-1184.57	-2159.55	-4560.55	-2474.33	614.814
25	acceptor	59911.2	53944.5	55911.2	62637.9	43867.9	-2119.37	-749.04	-1789	-363.2	468.323	704.095	1081.53	402.921	-840.283	-2206.33	-736.399	1932.97	-4757.16	1251.26	-277.513	730.528	2064.39	1008.59	4054.78	538.846	-583.923	-5425.43	-1241.66	-795.744	-1856.92	-3179.25	1627.12	54.961	11.554	5219.5	-2814.76	-1635.55	-2228.41	-3342.24	3107.94	452.954	2671.23	-2742.76	651.752	822.607	1247.62	44.14	-2856.13
25	fret	0.574748	0.544882	0.548983	0.57061
26	donor	34661.4	36860.9	30698.8	36436.5	33134.6	39399.2	34603.5	36674.5	31303.2	41934.6	34630.7	31567.8	43571.9	35033.6	43616	32897.2	42772.9	30976.1	31405.7	37686.6	40716.4	35265.2	36003.5	35745.8	34648.6	40739.6	34017.5	30422.6	36462	39746.6	33428.1	35047.5	34381.1	36761.3	31716.6	38307.8	40468	32194.3	30541.3	27638.3	36803	35882.4	68725.4	89860.7	80739.9	74246	76141.6	78099.7
26	acceptor	62339.4	43853.8	47536.5	48054.7	51559.6	40893.1	44924.3	55193.6	47259.9	41087.4	48718.3	47795.8	42530.5	54334.6	42863.6	50009.7	46403.3	52349.8	45256.6	57221.7	40368.7	46654.5	59360.6	49954	44353.6	46680.4	59523.2	43020.1	55059.2	42014.7	50969.8	46343.6	51082.4	51948.5	47590.1	42385.4	38607.2	49446.1	48480.8	52241.1	44364.4	52984.1	18882.6	3733.98	3059.34	11194.8	10693.9	8172.4
26	fret	0.642337	0.543389	0.607844	0.569233	0.608831	0.509467	0.565262	0.600927	0.601915	0.494457	0.584109	0.601915	0.493455	0.607844	0.495458	0.602904	0.520458	0.628557	0.590046	0.602904	0.497461	0.569233	0.622645	0.583118	0.56129	0.534423	0.636434	0.586089	0.601915	0.513466	0.603892	0.569233	0.597961	0.586089	0.599938	0.525448	0.488445	0.605868	0.613767	0.654129	0.546375	0.595983	0.215268	0.0403277	0.0360919	0.130879	0.123545	0.0951978
27	donor	32449.2	33590.6	36570.1	36828.4	31478.5	27877.5	34138.6	23957	21079.3	26601.4	25593.2	25597.8	32064.1	23623.5	28657.2	37125.9	26293	27559.6	29878.4	24793.1	34032.1	30183.7	26213.2	40030.2	32300.5	34223.1	24562.9	28010.6	27807	25984.6	26870.7	28286.1	32878.2	34122.9	20763	30805.3	33770.7	26438.6	32118.9	24896.4	30188.4	30914.9	27941.7	26216.3	28982.8	27680.2	24984.1	22823.5
27	acceptor	33930.8	47519.1	41213.9	41359.1	41714.8	45747.9	42985.3	39155.2	38701.6	39308.2	40866.7	35549.8	43385.9	38917.3	39705.4	43042.7	46692.4	38873.1	42707.8	42547.7	30265.3	42343.6	48402.1	28518.4	44788.3	34514.4	39145.2	38974.6	44695.7	38405.2	44880.5	46237.7	37120.1	29863.6	44340.9	38166.1	43748.2	40791	35802.1	41918.6	43070.6	36126.9	33039.7	40750.6	49592.1	38880.5	45485.4	36462.8
27	fret	0.510762	0.58549	0.530023	0.529006	0.569981	0.620943	0.557632	0.619894	0.64728	0.596914	0.614656	0.581346	0.575142	0.621992	0.580311	0.537163	0.639882	0.58549	0.588601	0.63145	0.470601	0.583417	0.648338	0.416261	0.581346	0.501678	0.614656	0.581346	0.61675	0.596914	0.625141	0.620943	0.530023	0.466615	0.681329	0.553527	0.56483	0.606294	0.526972	0.627243	0.587564	0.539204	0.542267	0.608382	0.63145	0.584454	0.645164	0.614656
28	donor	26399.7	21957.7	24013.2	17100	25693.4	17517	26696.8	18906.5	14911.1	18093.6	19010.2	25249.5	15213.8	17462	26703.9	19240.2	21321.2	19186.6	17883.3	21149.7	20787	21003.6	17601	20741.1	24545.3	18059	23733.1	22555.4	19651.6	20189.3	17146.6	24615.1	17917.8	37026	44327.4	47742.7	47153.5	46947.4	45937.7	48403.9	46976.4	47579	45690	53053.4	50271	48845.6	48563.4	48806.8
28	acceptor	30397.5	23913.1	21577.1	27370.2	23260.5	21067.4	21530.1	31529.9	31615.1	33318.3	20359.5	27098.7	34015.6	28390.2	25322.3	27117.9	33579	29764.1	27020.1	30411.3	27846.6	29278.8	23044.2	30439.5	30349.1	26832.9	25599.8	28370.2	24134.9	33372.6	28186	26551.3	26580.9	2388.46	-4325.28	-1314.23	-4851.66	1551.51	-1540.61	-5124.28	527.937	-2901.21	-4462.44	-8605.78	-3181.89	1696.37	-1957.16	-1136.58
28	fret	0.53539	0.521415	0.473388	0.615957	0.475393	0.54636	0.446297	0.624878	0.679269	0.647651	0.517419	0.517419	0.691106	0.618931	0.486413	0.58518	0.61199	0.608021	0.602067	0.590149	0.572255	0.5822	0.567277	0.595116	0.553336	0.598095	0.519417	0.557321	0.551343	0.622896	0.621905	0.519417
29	donor	27522.3	24858.6	23721	17032	24663.3	27031.3	20208.8	17333.2	18374.9	24388.6	21638.8	20885.2	16292.7	26623	23913	21167.7	23668	17653.2	23832.5	19210.2	20379.8	24675.5	23767.4	22820.6	29660.8	21485.4	21468.9	20506.7	35575.2	22702.5	22742.3	17602.4	18473.1	31741.9	27401	26141.9	14171.9	20231.9	22148.6	27818.1	33368.4	29041.8	18678.3	26147.5	21637.7	17219.6	18379.3	16044.4
29	acceptor	35206.8	21049.6	25743.8	26775.3	20753.7	24553.2	31353.6	29742.4	27258.9	26111.9	28269.5	34900.2	31787.1	22033.1	31303	34195.3	19538.8	28399.6	25590	34243.3	33454.7	24863.9	30841	25704.5	28587.4	23252.7	23954.9	31693.1	26818.1	29170	19709.2	23171.4	31085.6	24939.6	29805.5	25050.4	28599.2	19356.9	27567	25859.2	28390.3	19937.3	25946.2	26564.2	20239.9	32610.4	36984.3	33263.5
29	fret	0.561355	0.458354	0.520552	0.611038	0.457362	0.476282	0.60791	0.631975	0.597504	0.517513	0.566494	0.625679	0.661511	0.452402	0.566494	0.617304	0.452402	0.616259	0.517513	0.640388	0.621489	0.502364	0.564437	0.529677	0.490299	0.519538	0.527645	0.606867	0.429691	0.562382	0.464319	0.568552	0.626727	0.439544	0.520552	0.489296	0.668952	0.489296	0.554176	0.481281	0.459348	0.407148	0.580927	0.50438	0.483282	0.654098	0.66789	0.67427
30	donor	25642.2	31199.8	27006.7	34840.6	27501.6	27996.5	30756.4	35940.5	40950.4	22214.4	24454.2	39702.8	32249.2	35415.8	24942.2	24417.5	34364	35667.8	34104	29552.3	31380.8	28375.7	22485.9	20866	18898.9	26738.6	25708.6	33113	26471.6	19400.7	31604.2	26099.3	22417.2	25284.7	26116.5	30890.4	70785.5	62630.7	55666.3	56562.2	61057.7	56298.7	61323.5	62836.9	66440	60132.1	53754.2	64413.4
30	acceptor	38399	29441.2	30779.2	30830.3	35280.3	36384.1	36212.6	25198	35622.4	28400.9	24827.3	24413.7	29830.9	22450.3	26655.9	34453.8	39409.9	30104.5	35619.9	37393.9	38614.6	31992.6	41770.3	39977.8	34199.9	29008.4	30167.8	27628.5	36728.9	36508.1	24894.9	29502.7	44738	26315	24737.1	27025	-6789.81	3476.95	-2515.06	2638.77	-2739.04	395.598	3454.66	8.026	-548.309	350.123	-1981.2	-1647
30	fret	0.599631	0.485306	0.533037	0.469277	0.561942	0.56506	0.54023	0.412088	0.465287	0.560903	0.503471	0.381135	0.480285	0.38787	0.516668	0.584903	0.534064	0.457328	0.510562	0.558828	0.551578	0.529961	0.649736	0.657305	0.644354	0.520758	0.54023	0.455342	0.580712	0.652985	0.440505	0.530986	0.665968	0.509547	0.486311
31	donor	12676.2	6103.75	3489.61	10516.3	9020.71	4821.4	10961.2	9700.51	8495.41	9376.06	10537.9	9808.66	5714.41	9870.46	14938.1	11984	1289.53	8226.58	6097.57	7129.63	4938.82	13093.3	3925.3	8609.74	6591.97	-1009.43	13893.6	12478.4	10170.2	8263.66	11777	10000.2	3387.64	2476.09	195.675	5729.86	8931.1	13491.9	6310.78	13105.7	5600.08	8495.41	3421.63	6035.77	14051.2	9960.07	7565.32	5939.98
31	acceptor	36943.9	43703.6	54945.4	38012.4	39894.6	40307.5	44296	40248.6	32941.9	44908.3	33567.5	52846.3	44989.4	43852.8	36088.3	50004.3	52952.5	37290.9	36905.2	37365.5	47020.8	52134	44468.2	36922.9	47160.9	41411.4	50666.2	38468.8	48872	45812.5	41541	49959.2	39837.4	43889	42955.7	34861	45677.2	36751.4	32740.6	34182	44218.4	42743.1	35316.7	36193.7	46567.2	45946.4	32654.6	47010.4
31	fret	0.744855	0.876891	0.940128	0.783158	0.815181	0.893445	0.801415	0.805995	0.79456	0.82671	0.760563	0.84294	0.887521	0.816331	0.707113	0.807141	0.976621	0.819786	0.858104	0.839453	0.905335	0.799128	0.918477	0.810584	0.876891	1.02484	0.784294	0.754941	0.827866	0.847596	0.77862	0.833653	0.922073	0.946175	0.995061	0.859274	0.835971	0.731469	0.838292	0.722584	0.887521	0.833653	0.9113	0.856934	0.768454	0.822092	0.811732	0.887521
32	donor	20398.6	28284.3	30785.8	25291.8	32853.1	22989.5	29469.1	27041.5	25093.8	22342.9	31876.5	25383.5	26368	25933.9	34371.2	25947.4	33084.7	29821.4	26833.4	21349.5	24175.3	30303.6	22386.5	21003.8	14522	30672.8	19963.4	27018	23341.9	20113.3	24873.4	25308.6	24854.4	21073.1	25212.4	26220.3	29848.3	23063.3	24180.9	34982.1	26129.7	28223.9	21258.8	21932.3	26601.8	26945.2	22394.3	12158.1
32	acceptor	23560.3	36688.3	26245.1	33060.9	24619.1	36760.6	28847.9	24457.3	30881.5	25098.9	25597	29904.5	24342.3	31606.8	19784.4	22296.4	26535.2	25535.9	34722.1	25592.6	17665.2	29742.2	35386.6	28742.7	25724.4	23784.6	38815.3	21877.9	32390.5	27532.2	23263.2	20784.9	23802.1	30315.5	38618.5	25585.6	28988	30112.4	31444.1	23305.8	31667.2	37941.4	38111.9	23587.1	38689.5	37776.9	35545.4	30455.2
32	fret	0.536101	0.564389	0.459991	0.566414	0.428236	0.615239	0.49492	0.474936	0.551233	0.52905	0.445085	0.541142	0.479926	0.549213	0.365234	0.461982	0.445085	0.460986	0.564389	0.545174	0.422301	0.49492	0.612175	0.577568	0.638775	0.43715	0.660347	0.44707	0.581629	0.577568	0.482921	0.451043	0.488918	0.589759	0.605034	0.49392	0.492919	0.566414	0.565401	0.399604	0.548203	0.57351	0.641852	0.517986	0.592811	0.583661	0.613196	0.715134
33	donor	30108.4	32989.2	27131.3	34691.8	83106	76608.1	84773.8	78215.4	81984	82879.4	79759.6	85134.4	85474.8	81798.8	84223.1	77960	78471.4	74220.8	80675.7	75947.9	76878.2	77949.6	76420.7	77231.2	78698.5	69812.8	79335.8	74593.4	74829.7	75662.5	83888.2	77298.2	76648.9	81472.5	83728.6	86096.8	95448.3	94772.3	87840.8	82732.9	77271.5	81696.4	76985.5	84161	80648.5	74732.8	72727.9	86343
33	acceptor	54734.8	46682	51479.4	43539.9	6894.82	3172.22	2139.11	-887.972	-474.34	-64.483	-4278.16	4057.01	-21.732	-472.215	652.039	-4993.23	2564.09	-161.344	-908.21	5190.32	-4592.27	-3144.86	-5032.48	-1223.22	2520.93	2026.57	2471.77	-109.83	-2211.56	5216.42	-2088.62	-6614.35	1743.29	-1753.96	-6661.56	-1890.58	-1720.48	-823.025	-437.83	3048.55	429.143	-195.317	-2162.94	-2140.67	2018.42	-284.259	-2730.43	-4548.87
33	fret	0.645054	0.586404	0.654977	0.556511
34	donor	25694.5	34222.5	31932.1	38344.3	32853.9	31420.6	37454	28297.4	33044.1	33307.8	29016.7	35098.9	33398.5	54356.5	61072.5	63523.5	58668.6	60903.1	71321.9	66384.9	69665.2	62289.3	71100.2	62840.9	65534.7	61725.4	62350.4	68631.7	56788.4	59010.7	68989.5	66091.6	62345.1	59340.7	69069.8	59946.5	62366.1	63797.6	64223.6	57579.2	59871.4	68238.9	67194.9	56837.2	67311.9	66423.3	72699.3	61385
34	acceptor	28695	26305.9	27456.5	36092.3	28093.4	27705.6	26842.6	36143.1	31178.7	28847.6	33147.4	35406	36795	11985	372.28	-1359.47	-638.057	236.005	-482.912	-30.503	-2708.04	135.862	-454.286	-2958.3	-4518.39	3868.81	-3946.03	760.533	109.146	-1466.77	-960.847	-5878.82	-2287.61	1959.09	1108.94	-270.909	-274.858	1032.31	-2400.49	-2186.78	-3576.74	-3547.33	-2415.05	-314.494	-1801.34	-1025.06	319.71	-1230.34
34	fret	0.528063	0.434152	0.461894	0.485021	0.460895	0.4689	0.417526	0.560523	0.485021	0.463893	0.533258	0.502315	0.523917
35	donor	27032.1	30920.9	26863.2	26510.3	20344.8	35324.6	30817.9	31034.9	31967.3	30800.1	33363.8	28502.8	26521.3	11239.3	31941.2	37733.2	29222.3	26708	27221.6	22147.8	24933.9	19501.7	14453.9	31624	25444.7	18028.3	28942.2	28881.8	30146.4	15688.4	31651.4	21366.4	24144.3	17194.8	23419.3	26779.4	34060	22870	29100.1	24365.4	25752.3	31755.8	23843.6	28462.9	18346.8	23464.6	21355.4	27398.7
35	acceptor	11260.8	11965.8	12765.6	10522.5	23988.1	4061.33	17010.7	12253.7	20225.8	12268.3	11691	16151	12282	19829.4	13724.8	15063.8	8479.91	10031.5	17867.5	5461.25	10275.8	21018.4	23302.5	13169.8	13711.4	16742.2	25795.4	14077.9	10122.6	19866.8	8062.63	21749.5	10269.3	28162.4	19241.6	13247.7	18516.7	21584	18567.3	10491.2	17071.9	10924.8	4956.39	21308.6	28361.3	22123	26176.5	16548.5
35	fret	0.293684	0.278853	0.321736	0.284404	0.54077	0.103335	0.355826	0.283478	0.387492	0.284404	0.259522	0.361546	0.3161	0.637976	0.300201	0.28533	0.22493	0.273314	0.396198	0.197965	0.291825	0.51829	0.616763	0.293684	0.350112	0.48195	0.470946	0.327385	0.251285	0.558269	0.203334	0.504103	0.298337	0.620992	0.45106	0.331158	0.352015	0.485964	0.389424	0.301127	0.399107	0.255858	0.172184	0.428382	0.607273	0.48496	0.551049	0.376892
36	donor	27868.7	29980.5	26503.6	28830.5	31928.9	25080.6	23608	27562.6	29906	26154.1	32785.1	27765.3	27783.9	30286.6	21163.2	26327.8	32433.5	27899.7	30563.8	27564.7	31372.5	23477.7	29178	24145.7	24431.2	33169.9	39145.3	25990.7	19769.1	19183.8	22069.1	28985.6	25217.1	23376.3	21471.4	25570.8	23963.7	25177.8	27026.9	24629.7	20646.1	34228.8	28361	26224.4	19440.3	29047.7	22731	23239.8
36	acceptor	30046.3	25560.2	28609.2	30440	27996.1	29148.8	27659.1	24420.9	20837.1	28994.2	26724.9	20652.9	29715.5	26197.1	32608.5	27932	25473.3	35178.3	23027.7	28640.6	20907.7	25935.3	31066.7	38295.1	28046.6	26706.9	20232.3	38311.2	33035.7	25471.3	27694.2	23242.9	21070.8	24237.1	32685.1	28589.5	43451.1	26418.8	23969.7	30092.8	23099.8	22177.7	29443.4	25834.4	29705.8	17847.1	24363.3	23951.2
36	fret	0.518395	0.460388	0.519401	0.513371	0.467357	0.537531	0.539549	0.469349	0.410869	0.525438	0.449455	0.426666	0.516385	0.463373	0.606564	0.514375	0.439535	0.557746	0.429633	0.509354	0.400034	0.524431	0.51538	0.613719	0.534505	0.446477	0.34034	0.595339	0.626007	0.56991	0.556733	0.445485	0.455416	0.509354	0.6035	0.527451	0.644489	0.512366	0.470346	0.549646	0.528459	0.393151	0.509354	0.496321	0.604521	0.38039	0.51739	0.507347
37	donor	23854.3	14574.7	22378.7	21785	17402.7	26233.9	29522.6	20560.7	19738	15220.1	17326.3	21445.1	17272.1	19733	17454.4	14195.3	12397	26524.6	15685.7	13985.9	19691.2	18585.1	22674.3	20058.2	25992.5	20028.6	16589.7	17375.6	18437.3	20903.1	15072.3	19373.4	18274.7	16001	17099.7	24058.8	18447.1	11029.9	22901	22630	16597.1	20112.4	23755.8	24529.3	18705.8	20666.7	26064	17621.9
37	acceptor	25415.3	30408.7	17406.7	18808.9	15168	20092.5	14341.9	18630.4	28658.1	19281.8	23573.8	19974.8	17108.7	24859.9	22376.7	27836.6	22056	21309.2	21674.8	18752.7	27939.6	23795.7	23345.3	19817.1	16555.9	26186.9	15981.4	21939.4	11577.8	17654.3	20554.8	26306.2	22477	11275.3	25273.3	17469.9	24678.4	23537.5	24405.2	16141	15444.4	25586.9	15756.1	22436.7	30095.1	27107.9	16214.2	21032.5
37	fret	0.51608	0.675826	0.437156	0.463098	0.466094	0.434165	0.326761	0.475082	0.592286	0.559161	0.576219	0.482076	0.498071	0.557155	0.56217	0.662719	0.640558	0.445135	0.580235	0.573208	0.586259	0.561167	0.507073	0.497071	0.389347	0.566183	0.491072	0.558158	0.385367	0.458107	0.577223	0.576219	0.55114	0.413238	0.596304	0.420211	0.572205	0.680869	0.51608	0.416226	0.482076	0.560164	0.398303	0.478079	0.616408	0.567186	0.383378	0.544123
38	donor	33773.1	23467.9	20896.5	21464.9	21296.3	26309.7	14934.5	24142.1	14272	19438.3	18760.2	13213.7	25200.4	22535	17466.7	16220.2	14773.8	22974	20547.6	16565.1	14487.6	20551.6	23859.9	21167	20700.5	19383.4	13562.5	22499.7	15534.2	27364.2	17023.7	27179.9	23342.5	12120	28156	17560.7	25274.9	24941.7	23091.6	21096.4	24494.9	17670.5	19062	22738.8	16988.4	14268.1	21829.4	17227.6
38	acceptor	31148.8	19726.2	32897.7	33354.9	26728.2	11511.5	39150	30504.8	20452.7	18045.7	31891.3	34644.1	26065.5	26253.8	36073	25046.7	13378.3	27186	33686.4	26174.1	30940.9	22544.6	23619.9	36536.9	23533	15678.7	28919	27933	34041.2	26060.1	40639.8	31877	15764.7	15782.4	29910.8	19937.1	33508.4	25724.2	30121.5	42543.4	20637.3	29336.2	24387.1	29020.7	29588.6	22640.1	27779.2	24749.2
38	fret	0.47966	0.456736	0.61187	0.608724	0.55679	0.304273	0.724265	0.55782	0.588875	0.481663	0.629768	0.724265	0.508839	0.538328	0.673406	0.606628	0.47566	0.54242	0.621332	0.61292	0.680923	0.523026	0.497735	0.632939	0.532201	0.446829	0.680923	0.553705	0.686305	0.487679	0.70468	0.53935	0.402686	0.566068	0.514914	0.531181	0.570201	0.507827	0.566068	0.668048	0.457729	0.624492	0.56091	0.56091	0.635054	0.61292	0.559879	0.589917
39	donor	79947.8	69453.6	73203.2	68060.2	58990	73894.7	78966.4	70490.6	89267	147846	142067	144958	145145	143179	147239	143762	157636	140407	131071	136331	133991	137260	145960	145146	142082	144697	137623	11993.7	-397.441	857.975	-5147.91	-2052.37	676.945	-2046.82	-2350.62	-251.785	-3554.01	1190.9	3087.9	-1939.31	1029.29	-5349.75	671.397	558.34	-2315.24	595.794	1457.94	1648.68
39	acceptor	72045.7	77744.7	80465.6	80935.4	70293	65113.6	72461.1	65916.9	43716.6	1505.62	1099.46	947.729	580.019	737.768	-4109.37	-2680.82	-612.605	3837.32	-542.904	2896.26	6659.03	400.816	339.571	-2788.33	2455.19	2126.54	-2361.5	-1841.93	438.647	-2763.42	-3311.88	-428.908	2482.94	81.907	2198.22	-1106.48	-1295.03	-2560.32	-3717.14	1415.36	-2158.95	-8	-280.946	1278.19	3573.19	602.844	-2684.39	-685.903
39	fret	0.473512	0.528082	0.523998	0.543454	0.543454	0.46852	0.478515	0.483527	0.328947
40	donor	26252.3	26153.3	29126.8	33346.3	35443.3	29739.8	28669.6	33838	27786.4	30082.4	32245	27067.7	24734.9	34254.1	30979	28485	32123.7	44774.4	62511.1	69550.6	79881.8	57498.4	65541.4	68108.9	65624.8	71943.4	70704.2	68928.7	64322.1	73705.5	71022.3	63590.2	62079.5	65100.8	75048.3	64673.7	79239.9	73230.5	83836.5	65317.8	62681.3	70172.4	68519.4	66985.3	59179.3	63171.9	64964	69894.3
40	acceptor	33180.9	33821.8	37982.2	37394.5	33955.2	39838.4	33528.2	31576.5	30837.7	36082.3	31286.7	38689.4	33731.9	45457.9	29085.4	26689.2	26492.4	3856.3	5062.7	-2167.31	-568.851	-351.727	1584.6	4802.73	2321.51	1657.23	3518.72	6079.65	1892.77	1599.16	5727.64	1570.88	2140.69	4612.5	-1813.45	-1575.33	2368.74	3079.66	3171	-884.063	1135.14	5390.94	4310.4	2748.95	364.05	2600.7	373.612	-201.922
40	fret	0.558008	0.564429	0.565502	0.528395	0.489086	0.573032	0.538906	0.482975	0.526301	0.545247	0.492168	0.588202	0.577351	0.5698	0.483992	0.483992
41	donor	44174.7	35823	42670.4	18965.5	34360.2	30862.4	30832.8	36992.4	33912.6	35920.8	30404.4	34472.8	26561.3	31993.3	26189.3	29386.2	33672.5	31184	28617	29578.9	32640.9	34969.3	38433	23033.9	31886.6	34047.5	29378.8	34037.1	32171.1	27819.7	27689.2	23807.6	25651.3	24963.6	27852.3	45152.9	31141.1	25685.4	28019.7	25971.5	31401.9	30548.2	28834.9	23561.6	30777.9	35508.8	34818.2	30025
41	acceptor	24800.1	30222.9	28080.2	39882.1	27908.6	28079.8	28875.1	30766.3	28383.9	30503	28081.9	32430.9	30224.8	30132.2	37171.4	33900.4	29318.9	23642.3	31976	27429.5	28856.4	30890	29685.4	29480	30411.8	21783.2	31534.7	24930.5	31696.6	35900.3	33698.7	33200.7	25806.9	29210.6	35902.1	24679.4	37158.6	33233.5	28869.7	33927.9	31914.5	24856.5	37038.1	34738	32671.1	24814.7	26188.8	30895.8
41	fret	0.359274	0.457252	0.397174	0.678187	0.448326	0.476168	0.483162	0.454275	0.455267	0.459239	0.480163	0.485162	0.532483	0.485162	0.586594	0.535525	0.465205	0.431524	0.527427	0.481162	0.469188	0.469188	0.435471	0.560975	0.488165	0.390342	0.51732	0.422661	0.496185	0.563018	0.548741	0.582483	0.501206	0.539584	0.563018	0.353479	0.543655	0.56404	0.507241	0.566085	0.504222	0.448326	0.561997	0.595859	0.515302	0.410875	0.429553	0.507241
42	donor	31556.9	43169.8	29878.7	29544.9	24542.8	32401.6	37094.5	27791.6	28759.5	29203.2	33983.5	26796.8	30094.9	25698.9	29917.9	29200.9	34631	30459	33409.9	24570.8	36405.5	19876.8	26554.8	26255.7	34065.2	29581.8	36483.9	33170.1	35568.7	19835.3	22517.3	24552.9	59968.6	70752.5	69753.2	63201.7	76834.5	85112.3	76013.4	72809.3	69995.2	60384.2	76768.4	73419.9	78354.8	76153.4	64701.8	75332.2
42	acceptor	30077.8	32233.1	35976.1	35193.1	33934.1	30713.1	26032	31428.4	37548	38921.2	30801.1	28216.1	38579.3	32242.2	38804	31799.9	34053.5	21969.5	29190.1	28391.1	28613.9	42216.5	38927	32250.9	31616.5	41025.2	39834.7	31901	35430.7	-2146.78	-11.603	1688.51	2920.82	493.795	1518.8	-1566.57	1857.4	-4297.76	4139.42	3623.36	-2593.17	-838.852	-1373.54	-7825.32	2281.11	-619.086	2176.23	-363.067
42	fret	0.488335	0.427195	0.54589	0.543755	0.580496	0.486287	0.412573	0.531013	0.566335	0.571765	0.475056	0.513158	0.562006	0.556614	0.564169	0.521532	0.495529	0.419377	0.465967	0.536308	0.439996	0.680207	0.5948	0.551242	0.481161	0.580496	0.521532	0.490387
43	donor	23847.6	28979.8	32496.5	29298.6	18082.8	31584.7	22628.6	38794.9	28089.5	24524.9	28079.6	37207.5	26075.9	29234.2	30995.1	31642.6	26303.9	33011.9	26925	28913.8	30484.6	23897.2	24044.2	28033.3	28775	31267.6	29039.3	27666.6	32633.7	26617.7	27546.1	31835.8	23484.2	19612.4	20028.6	31479	22463.4	23390.1	20177.3	21201.4	26556.6	23480.9	14739.5	18434.6	18271.1	22873.1	28451.3	21186.6
43	acceptor	36755.1	32620.7	32917.9	30451.6	33894.6	21098	37592.6	23666.6	27673.8	27031.5	29579.6	18719.7	30065.9	37760.9	37785.8	30163.6	37178.1	34540.7	39135.5	32303.7	34376	43478.3	32087.4	28005.7	25844	33857.6	29430.7	32683.5	32845.1	26508.2	26047.2	35580	32692.8	32469.6	29663.6	25534.5	33890.3	30501.7	33002.5	32078.4	28945.5	40380.4	34657.4	26905.8	35619.5	32184.3	26530.6	24284.9
43	fret	0.606986	0.529803	0.502786	0.509788	0.652186	0.400944	0.624053	0.379024	0.495786	0.524798	0.512789	0.334238	0.53581	0.563858	0.549831	0.487787	0.585916	0.511789	0.591935	0.527801	0.529803	0.64515	0.571878	0.499786	0.472796	0.519794	0.503786	0.541818	0.501786	0.498786	0.485788	0.527801	0.581905	0.623049	0.596951	0.447828	0.600965	0.565863	0.621041	0.601968	0.521795	0.632089	0.701482	0.592938	0.661234	0.584913	0.48279	0.533807
44	donor	35222.2	32406.7	26261	30394.5	23929.3	34029.2	34514.7	34315	32973	39060.1	35070.4	35380.2	33149.6	36106.2	43690.7	36975.2	46237.2	43292.2	26402.1	41921.7	39277.6	48011.5	36931.7	37597.4	42542.2	46955.3	36866.9	30327.1	36060.9	33836.6	40436.8	47649.4	36920.1	43316.2	41552.5	39273.2	38842.7	45611.5	49698.9	34655.9	34572.4	44025.3	43586	42080.6	36711.5	36384.9	40548.6	39187.9
44	acceptor	33715.7	39561.1	37916.4	30863	41356.4	31452.6	32151.2	37990.6	28817.8	21314.1	35726.2	24165.9	28279.3	26066.7	28830.7	34892.4	24556.3	23108.3	36514.6	22864	24553.8	22672.5	33219.7	23996	28874.5	28501.8	19717.1	29337.4	31936.3	33669.3	13921.9	16493.3	27268.8	17214	24027.9	26518.1	24989.7	17782.8	27658	35604.2	38690	27102.6	17047	27048.2	30313.7	24272.7	28630.3	23703.8
44	fret	0.489378	0.549669	0.591221	0.503393	0.633054	0.480385	0.482382	0.525483	0.466422	0.352938	0.504395	0.40596	0.460448	0.418795	0.397091	0.485379	0.347076	0.348053	0.580046	0.352938	0.384302	0.320766	0.4734	0.389214	0.403988	0.377427	0.348053	0.491378	0.469412	0.498384	0.255974	0.256936	0.424728	0.283932	0.36664	0.403002	0.391185	0.280068	0.357828	0.506401	0.528502	0.381355	0.281033	0.391185	0.452492	0.400046	0.413855	0.376446
45	donor	18366	12968.4	14255.9	15490.2	12841.9	19541.6	13608.5	11422.3	14611.7	13199.5	13718.5	9461.74	17746.1	16917.1	12847.4	16077.1	17918.5	13579.2	15365.5	5287.47	11741.4	8174.24	13074.8	13293	11178.4	12805.2	10655.7	13973.5	9834.05	13907.4	11198.6	13903.8	12102.8	13313.2	17584.7	15398.5	10635.5	10056	14835.5	18134.9	13813.9	17338.9	13933.1	8574.07	11165.6	16522.8	12282.5	11688.3
45	acceptor	37124.5	37670.5	32617.6	22577.6	24920.2	26959	22451.5	20234	31134.1	35619.3	32732.9	25418.7	20378.9	19753.9	22935.4	22843.4	28559.2	22721.4	29190.9	17785.6	20274.6	29064.2	36465.6	20037.2	25146.6	24095.3	21081.2	23890.1	36774.1	23611.4	34310.6	26859.6	28503.6	30512.2	29735.7	31340	33510.4	31990.4	28900.3	34946.9	30670.6	26194.1	29919.4	22556.3	25600.1	34591.4	29690.6	28673.3
45	fret	0.669016	0.743679	0.696217	0.593555	0.65965	0.58025	0.62235	0.638889	0.680508	0.729916	0.704618	0.728859	0.534497	0.538544	0.64096	0.587409	0.614103	0.625446	0.65549	0.771333	0.633714	0.780945	0.736263	0.600736	0.692023	0.653411	0.663806	0.630611	0.789507	0.629578	0.754295	0.658609	0.701466	0.696217	0.628545	0.670059	0.759612	0.760676	0.66069	0.658609	0.689927	0.601763	0.6826	0.724633	0.696217	0.676329	0.707772	0.710929
46	donor	36820.3	13891.6	29334.8	25999.7	26985.1	35674.2	31828.4	26647.1	34576.1	31567	24738.5	13009.3	14874.6	21525.7	23055.4	26141.2	37184.7	30377.8	38328.4	27483.8	31569.4	29876.7	27752.4	28107.2	25688	33072.7	35571.1	29589	32188	29368.4	34252.4	43046.9	44574.2	35796.5	59137.5	45892.9	42473.9	40198.5	39896.4	42011.1	33840	41303.8	31586.2	41392.6	34470.6	42795.2	33887.9	28713.8
46	acceptor	21817.1	33016.9	40155.5	25220.2	19884	31788.5	37523.3	28294	27087.2	26170.4	40821.4	38364.3	38727.7	46111.1	34464.3	43246.4	37362.3	18456.6	27003.7	27683.1	21101.5	25698.6	30935.8	28448.5	35494.1	25579.4	18315.2	26635.9	28967.1	31378.9	23784.1	19206.5	24128.4	30172.6	17444.3	22765.2	25554.6	18503.5	19279.5	28801.5	23955	27585.3	28144.5	22652.7	21903.9	21749.1	29140.9	32326.9
46	fret	0.372321	0.7034	0.578134	0.492529	0.424079	0.470965	0.541049	0.515503	0.438855	0.452809	0.623162	0.746594	0.722992	0.68169	0.599304	0.623162	0.500835	0.377964	0.413355	0.501877	0.400802	0.462855	0.527148	0.50292	0.580349	0.435886	0.33993	0.474039	0.474039	0.516557	0.409478	0.308404	0.350936	0.457831	0.227758	0.331742	0.37608	0.315523	0.325413	0.406579	0.414326	0.400802	0.470965	0.353704	0.388377	0.337194	0.461863	0.529277
47	donor	14861.5	26777.8	26910.6	36900.4	27392.3	21919.9	25831.1	26481.6	32264	29360.3	23223.6	38724.5	25180.6	30038.5	26157.7	23757.9	25216.6	33266	19448.1	25778.5	24699	27215.1	29642.7	27669.1	19716.6	20486.1	28186.7	27934.8	12063	19783	27945.9	22719.9	24245	16093.2	28374.9	24267.2	24555.1	30816.3	30509.1	13435.9	19135.3	5765.77	20331.1	15545.2	23027.1	18208	22354.5	27245.6
47	acceptor	29194.3	37885	32077.7	18306.5	36392.9	29859	20472.9	35581.2	23767.1	24799.6	27741.2	26396.1	30500.5	26017.8	28862	28006.9	32178.6	25323.7	23450	27592.1	29313.4	25288.7	24900.5	38691.8	34619.8	27155.7	25883.2	24297.5	38948	37028.3	27701.5	22208.6	32592.4	28773.5	28972.9	31014.6	32403.9	32325.3	30173.9	47396.7	38880.2	59552.9	20112.9	39442.4	25640.8	35256.6	35862.2	22221.3
47	fret	0.662223	0.585911	0.543853	0.331919	0.570675	0.577185	0.442278	0.572842	0.424566	0.458212	0.543853	0.405146	0.548112	0.464234	0.524843	0.540668	0.560962	0.432411	0.547046	0.516473	0.542791	0.481418	0.456211	0.582633	0.637106	0.569592	0.478368	0.46524	0.763339	0.651897	0.497817	0.494731	0.573926	0.641642	0.505044	0.560962	0.568511	0.512306	0.496788	0.779401	0.670303	0.911385	0.497817	0.717313	0.526943	0.659922	0.615724	0.449227
48	donor	24821.5	29856.2	32099.6	23583.1	14447.4	21270.5	14481	11727.2	21385.2	21650.3	29515.9	15927.1	19349.6	29832.5	21226.9	20344.6	27717.7	25966.9	27854.2	23393.2	22688.9	21177.5	28805.7	25084.6	22568.2	27009.5	28154.9	16312.9	23209.2	27844.3	17699.7	27539.6	27929.4	16611.6	26534.7	28570.3	19784.8	28336.9	25223.1	22534.6	20441.6	33183.7	15151.6	20912.4	27769.1	22514.8	22566.2	20328.8
48	acceptor	24772.7	19082.1	22829.3	26550.9	27374	21789.3	29168.4	25466	23389.8	30482.1	19470.3	28692.3	22822.2	19606.4	23224.3	20820	20802.4	24815.7	25065.4	25092.7	20937.1	24003.5	24528.3	23066.8	19453	25813.9	27621.6	27840.1	27166	22986.1	27243.9	22877	24032.1	22035.1	21218.7	21862.7	25028.1	26064.9	22896.4	22839.8	19506.2	22998.4	33478.7	27477.5	19830.6	21181	15650.8	26480.5
48	fret	0.499855	0.390195	0.415455	0.529306	0.654872	0.505921	0.667783	0.685079	0.522156	0.585064	0.39794	0.643118	0.541592	0.396971	0.522156	0.505921	0.429163	0.488773	0.473738	0.517068	0.479741	0.53135	0.459785	0.47874	0.462769	0.488773	0.494812	0.63034	0.539541	0.451847	0.606025	0.453829	0.462769	0.570492	0.443934	0.433093	0.558067	0.47874	0.475737	0.502886	0.488773	0.409603	0.688335	0.56738	0.416432	0.484755	0.409603	0.565307
49	donor	23379.8	29598.9	20571.8	26634.7	28796.1	23025.9	23682.4	24208.4	25003.3	16921.5	24781.8	24807.5	26555.6	30075.5	23806.9	25638.1	25171.4	26334.1	22735.2	29561.3	19974.6	26571.4	25998	21459.7	26348	29814.5	63713.9	58036.7	54508.9	57864.6	58902.8	64002.6	58748.5	63286.8	62428.6	60941.5	63102.9	54050.1	54293.3	63174.1	66043.4	63116.7	53502.4	62149.8	62369.3	49250.8	67384.1	56300.5
49	acceptor	32143.4	40138	31961.2	26900.3	35104.4	32827.5	38780.3	32951.2	30322.4	29047.5	35369.2	34213	31140.4	31056	34071	25465.4	30835.7	22701.1	24170.8	33766.7	39943.4	30114.7	28017.4	33320.6	32730.3	22144.3	5298.2	9012.5	970.983	-486.511	-3127.53	2691.72	-341.033	2615.28	1414.67	3312.96	-1682.01	2940.8	2630.29	6161.21	-4758.19	-532.892	3720.86	-5294.13	2943.22	3601.38	2008.99	-3937.24
49	fret	0.578954	0.575822	0.608379	0.502861	0.548847	0.587325	0.621099	0.576865	0.547816	0.63175	0.588373	0.579998	0.53958	0.507927	0.588373	0.498815	0.550912	0.462711	0.515027	0.533421	0.666144	0.531371	0.5191	0.608379	0.554012
50	donor	29833.2	33015.2	24605.3	25125	30577.1	24572.6	26715.4	26615.1	34445.6	33564.1	20931.9	28357.7	22082.7	33223.7	22951.8	19861	21736.7	32053.7	29165.9	28043.2	30046.2	29101.6	28258.5	31778.7	26922.8	23324.9	35748.6	27647.6	28445.6	18084.6	25823.8	34913.3	30856.6	23756.6	26833.7	16389.4	32374.9	28774.7	25787.7	25897.1	28805.2	26595.9	20947.6	30338.1	43642.2	27113.3	29385.7	26221.7
50	acceptor	29183.2	31279.9	38146.7	34384.3	38716	39568.6	40257.8	30156	33597.3	38819	35367.7	37640.4	37168	27479.9	40436.8	39551.6	48320.1	31588.3	32586.4	35483.5	42107.6	33960.3	42157.5	34689	35461.9	30526.8	39816.2	40734.7	32555.7	31362.4	41360.4	33652.7	39501	46240.9	33812.3	34293.3	35796.7	47340.6	42702.1	39640.5	42798.8	33985.8	40354.1	38414.6	39099.1	44084	50623.4	41637.8
50	fret	0.494402	0.486353	0.607739	0.577367	0.558695	0.617238	0.601426	0.530941	0.493394	0.536058	0.627834	0.57009	0.626772	0.452432	0.637407	0.665263	0.690157	0.496418	0.527876	0.558695	0.583622	0.538108	0.598275	0.521746	0.568014	0.566977	0.526855	0.596176	0.53401	0.634212	0.615124	0.490374	0.561798	0.660958	0.557662	0.677139	0.524814	0.621471	0.62359	0.60458	0.597225	0.560763	0.658809	0.558695	0.47233	0.619354	0.633148	0.614068
51	donor	46709.5	34533.8	40697	35311	37254	36211	40083.6	39543.6	34520.9	42768.2	45884.9	35071.9	42782.2	39726.5	36102	41363.3	51385.7	42767.8	44702.6	42855.1	44805.4	48626.2	40174.8	37062.5	42804.7	37978.8	44855.3	30803.8	41693	46169.5	45115.4	31395.6	39235.9	37382.2	49666.8	42811.4	41964.2	35502	40122	38960.9	48408.7	44470.8	40807.4	43482.5	44234.2	41490	37699.9	34753.7
51	acceptor	28014.8	36191.6	36892.2	39863.9	35646.2	36179.3	30357.9	40483.3	31457.5	23637.1	26888.9	35703.3	35902.1	36018.9	28720.2	32230.6	34364.8	32807.2	27795.1	27380.8	33019.6	27220	29063.3	35644.2	20536.5	31943.4	27755	35145.6	20732.5	27777.1	36282	43263.4	29881.7	27562.9	26880.1	23766	29031.8	27592	25544.1	22861.8	22966.9	33533	27394.1	26037.1	24815.3	20505.4	28881.7	34989.5
51	fret	0.374513	0.512203	0.475169	0.530179	0.489195	0.500204	0.430982	0.506205	0.477173	0.356308	0.369458	0.504205	0.456107	0.475169	0.443048	0.438022	0.400763	0.433999	0.383605	0.389664	0.423937	0.359343	0.41991	0.490196	0.323874	0.457111	0.382595	0.533173	0.33199	0.375523	0.446063	0.579978	0.431988	0.423937	0.351245	0.35732	0.408828	0.437016	0.388654	0.369458	0.321844	0.429975	0.401771	0.374513	0.359343	0.330976	0.433999	0.501205
52	donor	17616.7	13251	15032.3	17169.3	10048	14208.6	11458.8	15641.2	16459.7	16079	13611.2	14540	17545.6	14566.3	46325.7	47232.1	52970.2	47492.3	47233.4	43130.4	46908.4	53838.7	43002.9	45682.8	44502.8	46382.8	46302.7	50027.4	52174.7	48480.1	43089.4	49062.1	46778.3	47446.8	48408.3	45160.4	54898.2	45903.3	51733.1	41034.4	49640.9	49473.6	42843.9	50278.7	46032.8	50613.9	41237.6	44622
52	acceptor	27413.1	30769.7	25075.7	28212.8	36848.5	40290	29132.2	27770.3	34976.9	38113.3	31153.4	28404.5	25168.8	36120.8	5835.44	2465.42	-4846.42	1461.85	-3985.62	876.146	225.004	1847.78	-4432.22	-2649.78	2363.04	73.397	276.666	-1889.28	-3.604	2509.11	-1198.36	-544.315	-1830.18	2207.32	3815.35	1989.03	2805.97	3605.33	-2510.25	-1147.2	-2355.24	2027.32	1007.33	-3669.71	343.879	-2915.59	-622.007	371.1
52	fret	0.609025	0.698834	0.624742	0.621798	0.785388	0.739385	0.718179	0.639439	0.680398	0.703676	0.695927	0.661904	0.589325
53	donor	26806.1	23588	31444.1	27517.6	30042.7	22800	20244	26754.4	29292.9	22028.6	27493.9	22840.3	30261.6	24194.2	34378.2	33049	29741.1	26421.9	29088.4	27727.3	32396.3	32934.4	29379.7	27825.4	29997.3	31225.2	34059.1	35029.8	40395	33407.4	26593.3	23117.1	30784.2	29967.3	29250.6	22487.1	30969.1	34585.8	25984	15312.6	25021.5	28740.4	29146.3	28153.8	26478.7	32973.6	28665	25809.5
53	acceptor	29254	39819.9	35022.3	24654.3	25534.7	27287	31823	28416.9	25366.4	30770.3	28221.6	40954.4	26159.6	42851.1	38582.1	37694.4	26226.7	38325.7	29247.9	40136.6	37163.9	37220.9	31996.5	32724.3	29981.3	38381.8	41602.7	38936.5	35858.5	35484.4	41906.3	38292.2	36444.5	34895.7	37054.1	35210.5	46848.9	29914.4	39207.6	34228.1	38384.6	31395.9	31625	37979.5	26391.8	37720.8	24996.3	46731.5
53	fret	0.522029	0.627663	0.527178	0.472276	0.459288	0.544787	0.611454	0.514842	0.464273	0.582607	0.506649	0.641817	0.463275	0.639615	0.529241	0.532341	0.46827	0.592176	0.501554	0.591111	0.53441	0.530274	0.521	0.54063	0.499519	0.55104	0.549997	0.526147	0.470272	0.514842	0.611454	0.623327	0.541668	0.537517	0.558361	0.610378	0.601792	0.464273	0.601792	0.690474	0.605007	0.522029	0.519973	0.57414	0.499519	0.533375	0.46627	0.644003
54	donor	37490.2	37124.6	54359	44827.2	46266.1	49378	42186.8	46823.4	42781.6	45670.1	44820.1	46056.9	55384.2	38423.6	52615.6	54081.6	49146.4	43819.7	49296.9	47765	53436.2	47792.1	45860.6	50865.1	46862.2	46570.6	43129.6	45927.6	49174.6	46545.9	48481	49981.1	43628.1	51039.1	44161.8	43810.3	43985.5	45791.2	52538	47279.5	48667.9	43076.7	48644.4	52595.6	43824.4	63176.1	38610.6	54509.5
54	acceptor	19457.9	22234.6	20672.3	20011.2	20548.7	10687.7	20575.7	13116.3	22190.6	23320	19633.2	18734	14357.5	18882.1	18412.2	18150.9	17775.3	22928.7	17480.2	20111.7	24145.8	21339.9	19560.9	16164.6	17035.4	17447.4	20690	18380.3	18370.9	28241.2	14628.6	14260.8	25872.6	16819.8	15157.8	16352.4	28406.3	14837.5	26895.1	17165	26757	21659.9	18705.8	19407.3	22612.1	21003.6	15918.3	25216.1
54	fret	0.34166	0.374359	0.27541	0.308357	0.307411	0.177745	0.328296	0.218824	0.34166	0.337836	0.304574	0.289487	0.205984	0.329249	0.259534	0.251159	0.266061	0.343574	0.261398	0.296078	0.311193	0.308357	0.298908	0.240962	0.266995	0.272603	0.324488	0.285727	0.271667	0.377261	0.231718	0.221582	0.372426	0.247449	0.255811	0.271667	0.392783	0.244667	0.338792	0.266061	0.355083	0.334971	0.277283	0.269798	0.340704	0.249306	0.29231	0.315938
55	donor	23648.9	18234.2	22877.2	24179.5	15245.2	28030.5	24191.9	23463.7	12134.9	18618.5	36541.5	43451.5	43311.5	42488.4	44151.7	50954.3	55858.7	42391.9	53484.3	42130.5	44305.7	39256.7	42959.8	36734.5	39264.4	53565.2	36116.7	46831	59591.4	47243.3	55685.9	50587.1	50994.7	48119.4	51810.1	48621.9	50686.7	50261.9	49485.5	33446.7	35058.7	24671.2	27366.1	26387.4	23563.3	20085.8	24182.6	20194.7
55	acceptor	31664.5	29136.6	23462.4	19393	21751.1	30424.3	30127.2	20724.7	29626.7	23001.6	9632.89	10482.7	4502.91	3700.71	1402.51	2709.06	-911.306	2331.31	667.008	-130.95	2845.71	5112.67	5946.95	14233.4	899.137	8385.11	7438.43	8496.77	-2001.18	4264.96	5700.38	5692.92	8673.56	5924.25	11985.5	2064.71	231.319	1281.91	7608.31	18448.7	14011.6	23461.6	17211.6	13366.3	24129.4	27295.9	24499.6	30542.2
55	fret	0.572801	0.615227	0.506523	0.444906	0.58791	0.519975	0.554643	0.468858	0.709428	0.55252	0.208952	0.194666	0.0938703	0.0799434	0.0308125	0.0502502	-0.016574	0.0517572	0.0123856	-0.00289747	0.0600756	0.11503	0.121363	0.279037	0.0226732	0.135719	0.170625	0.153468	-0.0350608	0.083026	0.0930928	0.100887	0.145372	0.109513	0.187993	0.0404961	0.00435817	0.0248881	0.133316	0.355476	0.285265	0.487053	0.385656	0.335995	0.505493	0.576027	0.503436	0.602068
56	donor	26394.8	23750.8	18461	19418.1	19484.5	24711.7	22681.8	21969.2	27414.4	25407.3	26749.2	18193.8	52502.6	15144.2	24886.1	17826.1	21044.3	7337.43	16717.3	19992.4	46123	60470.5	66406.6	58006.6	57176.5	56964.2	60624	57278.8	66888	58315.5	52550	56469.5	58863.3	54193.3	60161.6	69585.1	65783.1	67568.4	65326.3	60980.4	71978.8	71800.7	67052.9	65066.6	65868.4	56198.5	61230.5	59371.2
56	acceptor	34085.6	46689	36582.6	36036.3	40258.9	46870.2	36135.8	39348.1	33968.6	37366.9	46541.8	45960.1	22206.2	33878.6	34770	47999.5	38150.7	41921.6	37288	26009.3	10991.4	4759.82	1500.35	1002.16	-4068.25	-45.78	5072.6	-3265.68	2033.59	-3589.86	1881.09	-4340.28	4962.33	361.561	-1532.93	-5002.71	3026.1	-2208.48	9408.07	11245.4	2706.87	2108.88	-2765.7	2771.76	2394.11	5656.31	-1578.03	7325.01
56	fret	0.563802	0.662511	0.66474	0.650297	0.673683	0.654729	0.614127	0.641464	0.55327	0.595765	0.634848	0.716752	0.297421	0.690568	0.582913	0.729404	0.644771	0.850846	0.690568
57	donor	39869.9	40872.2	40984.7	53323.3	40401.8	45474.6	54524	46982.2	45562.6	47307.4	51690.9	51306.4	52893.7	47917	49833.6	43805.5	54988.3	49046.1	43103.9	46558.8	53742.6	43926.2	36824.2	49236.3	52934.6	55624.5	52861	55203.1	48669.7	55595.8	48735.2	42660	56583.8	52337.3	46634.4	63329.9	72788.4	82079.1	78503.5	92523.5	85611.7	82343	75930.3	68764.8	73060.4	68010.1	74981.2	77337.6
57	acceptor	30987.4	27614.1	35337.4	23013	32670.2	18487.2	23551.8	22860	29373.6	24690.3	27385	26822.8	24836.2	25740.8	27508.4	31489.6	16144.5	21721.9	30362.1	32225.3	29962.3	33466	38920.3	21285.7	15039.5	23845.9	20001	19485.2	28522.7	28821.8	29567.2	28611.8	18572.4	24357.9	18659.9	15762.1	-5175.03	-2429.22	-3830.54	-243.691	-3567.61	-1737.32	-3700.89	1971.43	-1395.95	-2738.72	1758.15	4334.84
57	fret	0.437703	0.403539	0.46269	0.301102	0.446641	0.288783	0.301987	0.327036	0.392039	0.342504	0.346173	0.343421	0.319825	0.349853	0.355394	0.418066	0.226568	0.307311	0.413204	0.409329	0.358174	0.432764	0.51419	0.301987	0.2216	0.300218	0.27486	0.26109	0.369358	0.341589	0.377814	0.401615	0.247501	0.318018
58	donor	19318.9	23015.1	33907.2	30694.7	33459.3	20770.1	30237.6	51103	46770.8	48835.1	41734.6	51564.7	50080.6	48841.5	52754.3	54804.7	47930.1	50615.7	45765.8	49021.4	47048.9	46963.6	42226.6	42624.9	24631.4	36930.6	34058.6	23754	30242.2	35507.9	26356.1	22171.6	20452.5	28974.7	21899	25740.2	24658.1	35183.9	34713.1	34833.3	31116	25173	25560.3	31022.4	35272	28141.3	35616.2	39533.6
58	acceptor	48657.2	53741.9	34475	51970.9	37655	56394.2	41367.6	18009.5	10049.5	7667.4	18515.3	19457.2	21816.1	19556.8	15118.5	23012.5	22290.7	20449.8	22122.6	25468.1	16454.3	11225.7	22563.4	29022.6	60002.2	36199.7	41297.4	43125.3	44593.2	40260.1	47993	50682.1	53561.7	33613.4	40608.7	36162.4	47281.4	37389.6	40100.8	36970.8	36501.9	48043.9	42867.4	40940.7	35900.5	35047.8	36797.4	34603.2
58	fret	0.716224	0.699966	0.504621	0.628438	0.529975	0.730388	0.577227	0.26027	0.176587	0.135717	0.30686	0.274165	0.303108	0.286265	0.222654	0.295609	0.317225	0.288131	0.32573	0.341868	0.259346	0.192757	0.348541	0.405438	0.708625	0.494543	0.548372	0.644298	0.595933	0.530994	0.645359	0.695646	0.723842	0.537115	0.649593	0.584487	0.657038	0.514735	0.536094	0.514735	0.540181	0.655973	0.626329	0.568953	0.504621	0.55453	0.507652	0.466515
59	donor	22654.7	24274.1	24673.1	24282.4	21150.6	26510.3	23992.8	22195.7	18664.9	32170.1	41744.4	37815.8	45325.7	43168.4	42397.6	40653.4	41407.8	42713	45004.4	39428.2	47260.6	37998.2	45062.1	42754.2	42198.7	39357.6	42282.2	38253.6	40463.9	39075.1	39617.7	40282.6	43071.9	46936.9	50101.7	47029.9	35658.5	57.7467	3809.78	5822.32	-88.191	1953.77	73.0467	356.685	1543.02	2832.93	1453.58	-1020.31
59	acceptor	15601.9	20561.5	18109.3	18307.1	18324.4	23522.2	16319	17366.3	18947.3	1343.52	-1133.84	1933.57	2867.03	2146.9	589.244	-550.75	-1033.12	-1543.94	-4461.78	1775.46	-2461.26	607.107	-396.076	-1207.8	-1836.75	-39.351	-1133.82	1286.86	267.565	3296.96	3747.11	-1395.45	-2923.36	-605.973	6247.34	-360.82	-1885.14	6809.61	32.939	-123.592	-582.54	-63.32	3481.65	318.513	5687.82	-446.199	3106.2	63.382
59	fret	0.408185	0.459027	0.423494	0.429604	0.464081	0.47014	0.405117	0.438755
60	donor	27181.9	27887.3	36397.6	48082	46575.5	50564.4	45934.6	41619.4	48251	44455.5	50942.5	48221.7	46935	41784.5	53171	50160	46479.8	49679.3	46544.3	55688.6	51157.5	47188.1	48269.6	48948.6	45841.8	46567.7	45667.9	52153	51040.2	53918.3	51711.4	39036.3	47025.9	41766.9	45444.2	55245.1	45217.5	47863.2	36693.6	46468.1	44205.4	43359.4	47427.4	46383.1	46995.6	47043.5	50399.3	47720.5
60	acceptor	-1723.04	1375.51	989.943	-3519.01	-1227.31	-8829.24	-4487.15	2721.22	173.529	-2637.2	2458.09	-2511.2	3326.34	3111.17	-3454.55	1875.87	2234.57	1707.31	5095.1	1521.69	3546.8	-907.248	2660.73	1731.97	-267.751	790.41	-111.453	6564.3	-4855.69	861.323	-416.007	3097.29	3144.02	-2626.12	-3333.85	-5551.08	2177.27	1917.75	-783.045	4453.1	2220.73	-3019.26	2527.01	-1124.34	2553.76	-1429.14	3126.39	-3571.06
60	fret	-0.0680412	0.0469944	0.0267446	-0.0793332	-0.0272795	-0.211615	-0.10813	0.0614385	0.00332727	-0.0631857	0.0461473	-0.0550715	0.0665564	0.0691193	-0.0696576	0.0360046	0.0461473	0.0334762	0.0983508	0.0267446	0.0648493	-0.0198697	0.0520827	0.0343189	-0.00581192	0.0166814	-0.0024925	0.112225	-0.104947	0.0158446	-0.00829855	0.0733955	0.0622907	-0.0672326	-0.0793332	-0.111309	0.0461473	0.0385369	-0.0215182	0.0871337	0.0478417	-0.0745002	0.0503854	-0.024812	0.0512339	-0.0313864	0.0580323	-0.0809421
61	donor	18962.6	22003.5	26201.3	22030	25965.6	17444.3	28969	31452.5	26342.4	21908.8	28440.2	29504.5	20987.7	20846.6	20981.1	22598.5	18731.2	28858.9	24568.5	24445.1	23050.2	29394.3	28032.5	30745.1	26560.5	38169	26227.8	25018	36520.7	15882	20908.3	23997.8	20890.7	25011.4	33955.8	32210.5	23947.1	30267	24678.7	33411.5	30958.9	36560.4	20694.6	35573.2	22499.3	24059.5	22032.2	17349.5
61	acceptor	34700.9	34392.8	33098	31230.5	26092.7	37414.9	24802.6	32008.6	26556.3	32392.1	30640.1	17632.2	26906.1	27958.9	32137.9	29934.5	36951.6	22632.7	33462.7	27263.2	31133.6	26168.2	25867.1	25300.7	19639.3	30955.9	25955.9	31334	28441.8	25195.9	30454.4	29302.7	36382.9	27623.2	24484.4	16987.5	29344.6	26126.2	35493.9	20563.7	35389.6	22939.6	25333.2	19486.5	31633.1	28218.6	27330.8	36825.5
61	fret	0.646129	0.60951	0.557665	0.586624	0.501262	0.682427	0.461736	0.504344	0.502288	0.596393	0.518805	0.374173	0.561922	0.572616	0.605126	0.569401	0.663046	0.43987	0.576914	0.527127	0.574763	0.470769	0.479856	0.451759	0.425136	0.447786	0.497162	0.55554	0.437897	0.613905	0.59313	0.55024	0.634946	0.525043	0.419281	0.345134	0.55024	0.463739	0.589874	0.380807	0.533398	0.385564	0.55024	0.353507	0.584461	0.539693	0.553418	0.680135
62	donor	11336.1	20033.4	12851.8	30123.5	17289.2	19757.8	14520.2	20129.7	13472.6	21306.7	10922.7	18798.3	13575.6	12715.6	14483.7	18868	16321.4	17513.3	16258.3	19223.2	20216	15227.4	19153.5	4684.07	9412.04	8606.89	10557.5	17501.7	9337.34	19671.5	16296.5	21701.8	18589.1	14075.3	8797.8	12569.6	14482	22540.1	15169.3	24666.7	22614.8	17657.8	8170.28	18615.6	21620.4	19520.4	13987.3	17573.1
62	acceptor	29944	31876.9	23603.9	15493.7	26599.5	24611.4	18165	21900.6	30584	16475.1	37520.2	23626.9	39949	36578.9	32407.8	25529.9	21141.8	6748.6	17989.3	22917.5	11902.4	21747.4	19657.9	36406.6	36888.2	31691	36003	28096.6	39679.6	25375.7	25489	25260.2	19482.4	28113	35875	31078.5	40500.2	34286.9	30284.7	23723.2	20591.3	21772.6	23894.2	23898.7	22959	26604.5	29163.8	22876.9
62	fret	0.725833	0.614463	0.647101	0.339789	0.606537	0.55488	0.555876	0.520977	0.694406	0.435775	0.774762	0.556871	0.746409	0.742493	0.691455	0.574778	0.564832	0.27773	0.524971	0.543923	0.370188	0.587689	0.506987	0.885531	0.797199	0.786474	0.772809	0.616444	0.80986	0.562843	0.60951	0.537941	0.511986	0.666835	0.803044	0.712094	0.736615	0.603563	0.665849	0.489977	0.476952	0.551893	0.74543	0.561848	0.514984	0.576766	0.675704	0.565827
63	donor	26835.7	28066.4	29340.8	31065	24122.5	30071.1	27793.9	33761.3	27611.6	27131	31510.9	32043.1	34573.9	32216.5	29654.9	25012.4	30106.8	31950.9	26553.3	31588.2	26415.5	30180.1	22015.8	26624.6	31716	29760.9	27565	25473.1	18448.4	28765	23374.3	27184.5	28525.2	28937.5	28055.5	23325.8	26745.5	17321.7	21822.5	23601.3	25802.1	25642.6	26058.8	30586.4	20320.3	21941.4	31344.4	27310.3
63	acceptor	20796.4	19460.5	17589.2	17859.4	11494.2	20537.1	19036	16779	10353.7	14011.8	19093.6	21724.6	15555.2	20983.8	16484.7	14992.1	19207.2	19730.1	21793.8	12919.8	17154.8	10033.6	22752.4	15899.7	19995	10916.4	21231.8	16148.5	22797.4	13371.1	20322.5	19378.3	16362.6	12611.6	18403.7	23258.2	20288.6	19731.4	20162.7	17894.3	19869.2	14279.1	9187.2	18560.5	22244.1	27128	17606.5	18968.7
63	fret	0.436321	0.409531	0.374921	0.365057	0.322766	0.405569	0.406559	0.331599	0.272862	0.340445	0.376895	0.403588	0.310019	0.39468	0.357174	0.374921	0.389738	0.381833	0.451239	0.290444	0.393691	0.249477	0.508155	0.373934	0.386772	0.267987	0.435328	0.387761	0.552333	0.31688	0.465185	0.416469	0.364071	0.303163	0.395669	0.499144	0.431354	0.532227	0.480151	0.431354	0.435328	0.358159	0.260188	0.377883	0.522189	0.55334	0.360129	0.409531
64	donor	6920.29	5999.23	2169.22	2748.15	4427.84	6822.71	4067.27	6371.7	2846.33	5053.78	6545.44	3500.23	7401.05	3976.23	4747.95	4950.84	4706.89	5385.19	1627.77	4320.74	7258.25	4944.3	8088.28	6300.3	4508.16	5813	4401.66	4494.48	4581.35	6383.01	1229.12	6286.62	3962.55	3500.23	3823.91	4407.01	5797.53	4074.41	5790.98	3250.33	5198.36	7079.75	4563.5	4438.55	6655.52	2120.43	5993.28	5326.88
64	acceptor	9114.07	11755.2	21687.1	19472.4	10267.6	18303.8	14878.7	17935.2	21054.6	14329.6	13232.1	21691	10743.4	8326.51	17965.1	22556.4	16245.3	12040.4	15624.2	26402.2	16180.8	10341.4	22784.8	15584.3	16389.4	8897.28	16857.5	23611.6	16216.4	7621.07	21996.8	15270.3	13741.9	5057.46	18214	15366.9	18543.4	14989.2	14102.5	19379.3	11856.6	14179.9	8295.39	17437.1	20407.8	20193.6	9770.02	12935
64	fret	0.568873	0.662349	0.908977	0.876399	0.69895	0.728845	0.785645	0.737722	0.88089	0.739323	0.66947	0.860741	0.591905	0.67652	0.790841	0.819745	0.775126	0.691267	0.905921	0.859417	0.690408	0.67652	0.737722	0.712399	0.784153	0.604615	0.793055	0.8399	0.779655	0.544063	0.94729	0.708224	0.775883	0.590919	0.826769	0.777395	0.762121	0.78639	0.709061	0.856096	0.695546	0.666808	0.645144	0.79746	0.754348	0.904695	0.619961	0.708224
65	donor	-1871.08	-599.623	1554	36219.1	48346.6	46971.5	27146.3	55410.2	16984.1	27767.9	41097.7	43019	28223.1	22628.7	31591.6	29670.3	38178.1	41072.6	30401.8	49448.5	11242.1	14802.2	52088.7	63654.2	68667.8	52591	56025.5	47024.9	40614.2	35267.9	62649.6	48682.5	39741.5	46186.7	48839.4	42890.3	47944.7	33296.3	50136	40532.6	31701.5	-1927.58	30163.2	56389.7	53200	48761	58119.5	45561.9
65	acceptor	58167.2	54081.5	57777.8	33736.9	22250.1	37644.3	31620.7	33111.7	44008.9	43168.2	49300.9	51375	55700.1	46903.2	47583.2	59524.5	44582.4	34507.4	39930.8	27631.4	41733.2	45032.8	20741.9	34946.4	21786.8	31586.2	18108.3	27407.8	30555.5	31844.2	16918.2	30383.7	31647.5	20174.4	20700.9	26557.9	32284	23634.8	24509.3	20875.9	30640.2	49443.7	32558.2	13614.2	13580.8	25906.2	21532.3	28639.8
65	fret	1.03288	1.01175	0.974058	0.482614	0.314961	0.444678	0.537872	0.373908	0.721806	0.608731	0.545154	0.544112	0.66335	0.674458	0.601205	0.667786	0.53891	0.456575	0.568223	0.358755	0.787907	0.752847	0.284836	0.354045	0.241026	0.37486	0.244562	0.368211	0.428934	0.474563	0.212993	0.3844	0.44369	0.303948	0.297554	0.382488	0.402664	0.415266	0.327895	0.339989	0.491712	1.04084	0.519273	0.194837	0.203459	0.346526	0.270412	0.386314
66	donor	26871.3	25304	25790.7	24190.9	22709.6	23523.6	28047.9	24948.5	25313.8	22632	22472.6	27317.1	22732.2	22402	20877	27669.8	25529.7	22633.4	19659.5	21559.8	19888.1	26019.2	19122	25919	25151.6	25541	25751.2	22189	20912.3	24563.3	24865.2	17381.2	11698.6	18497.1	18497.1	24530.9	24680.4	26345.1	17516.6	25782.2	18330.6	22760.4	23509.5	20133.5	24000.4	19456.4	26143.4	19615.8
66	acceptor	31127.5	33697.3	30902.1	34391.2	32494.3	27935.7	28642	29271.7	34311.9	30681.5	32847.9	29114.8	38650.7	30468.5	38100.5	26441.9	25851.5	25578.6	34030.4	20214	34665.4	31605	35117.7	26341.7	40425.6	32255.8	32181.6	34166.1	23607.2	34100.4	39665.5	32506	43852.5	47564.1	27022.8	27521.1	31838.8	33205.3	35274.8	28934.4	33712	32326.4	34146.8	39114.8	26284.3	33731.5	32479.8	33506.9
66	fret	0.536568	0.57118	0.545529	0.586792	0.588735	0.542547	0.505375	0.53956	0.575095	0.575095	0.593582	0.515493	0.630032	0.576073	0.646086	0.489074	0.503345	0.530571	0.633826	0.483952	0.63572	0.548506	0.647027	0.504361	0.616676	0.558398	0.555436	0.606127	0.530571	0.580953	0.614763	0.651725	0.789024	0.719874	0.593582	0.528567	0.563324	0.557411	0.668537	0.528567	0.647968	0.586792	0.592614	0.66015	0.522544	0.633826	0.554448	0.630981
67	donor	42987.5	26494.5	27956	32190	35222.8	50294.9	50280.7	112271	182001	187955	195376	194026	202133	185158	131465	2185.9	-4962.97	159.34	1580.17	3873.01	-3798.25	-3300.25	4519.4	-3.27303	-1113.11	-1739.17	-2771.76	-3235.2	3303.87	-1981.05	5358.89	112.588	824.021	-2035.93	-1405.81	-1501.34	5125.13	4415.73	-907.808	606.526	-64.2529	-4265.76	-92.7097	1242.75	-2515.64	3807.97	-1350.93	1035.42
67	acceptor	147560	155165	172195	113826	121410	125247	135918	65506.2	-6599.84	-5808.3	-2976.82	-3038.32	-10208.9	-4636.36	-3757.53	-1.193	-2177.52	-3684.4	3827.22	-10090.4	-2407.04	-4153.79	-2012.5	-343.536	3367.21	-7113.36	-353.92	4301.13	-2419.11	1537.98	4398.44	1554.31	2920.11	-2250.53	4409.37	-2786.05	1942.09	1437.46	1997.6	1018.61	2764.34	1356.69	3641.22	2063.53	-853.499	-1172.29	-3522.03	1163.04
67	fret	0.774599	0.853646	0.86011	0.779901	0.774599	0.713503	0.730282
68	donor	36618.5	35159.7	31423.3	29188.2	33167.4	35771.4	41672.1	40432.5	31674.9	35896.7	35904.5	52995.5	90039.4	89756.3	88253.2	86298.5	89401.9	88188.6	84825.1	98684.6	95272.8	90648.3	99059.9	92921.5	88143.1	94107.3	96173.8	91137	86932.6	85544.7	76829.3	75304.8	93604	97544.4	85587.9	96262	87060.7	83806.8	77490.9	93201.8	79345.7	86622.6	85070	88767.7	93389.4	83620.8	78388	91606
68	acceptor	51504.1	48861.1	56291.2	56352.6	54910.8	57419.4	50148.1	53863	53715.7	47817.7	53301.4	35632.4	-2362.81	-644.037	-700.842	5735.03	2249.2	-251.919	-4642.64	-5873.68	-2923.45	4509.34	804.052	-460.983	-2672.85	844.705	-1109.24	-3879.16	-5754.68	-1099.48	5710.39	792.518	-1029.18	1193.52	-1946.38	542.395	1457.03	-1045.08	4842.88	-987.981	1240.48	1744.11	-1230.41	-4289.71	-4708.03	-1661.33	-6976.3	-5647.98
68	fret	0.583974	0.581988	0.641414	0.65918	0.623619	0.615701	0.546175	0.571056	0.628565	0.571056	0.597864
69	donor	33815.9	19412.5	19296.2	21979.8	28769.1	22149.2	19478.5	15601.6	25653.7	30690.1	29785.2	23516.9	24667.4	24835.4	24781.1	31816.1	22986.9	26266.5	19038.9	28484.8	17826.4	14806.6	27928.9	22905.4	25938.1	20573.4	24335.2	20385.9	21845.4	31394.6	24653.2	18166.4	19457.8	30020.5	31688.1	26890.8	24752.7	23956.4	22453	30027	29985.6	19888.2	24384.3	24893.6	17335.1	28354.2	26126.9	22945.5
69	acceptor	22549.4	17314.7	18196.2	18713.6	11661	13032.5	18983.5	18517.7	15148.1	26994.6	14751.1	11042.8	22321.6	16955.8	26250.8	20316.8	14653	14800.7	17169.9	11825.5	19713.1	15858.9	12782.8	18578.8	24453.1	15781.4	13015.9	14808.6	21866.2	13615.7	27917	21088.3	13884.6	18145.3	22494	24180.3	14257	15648.2	15662.2	11991.9	15632.3	11869.8	12658.8	20946.1	19821.3	28636.1	17695.2	22433.6
69	fret	0.399614	0.471078	0.485637	0.459558	0.288039	0.369914	0.493874	0.542512	0.371023	0.467944	0.331745	0.319209	0.475247	0.406142	0.514321	0.389773	0.389773	0.359895	0.474205	0.293854	0.525456	0.517365	0.31348	0.447955	0.485637	0.434136	0.348691	0.421289	0.500036	0.301963	0.531497	0.537515	0.415886	0.37656	0.414807	0.473164	0.365468	0.395247	0.41048	0.285707	0.343062	0.37324	0.341933	0.457454	0.533505	0.502084	0.403969	0.493874
70	donor	122078	111308	128512	133855	130510	131679	134067	109899	102173	102989	123578	112373	127073	189033	170759	160277	104002	161935	169358	163668	48157.1	4089.44	2032.13	1565.72	2675.83	-1763.04	1931.5	-298.322	-1172.04	35.5122	-315.892	616.926	2088.03	2321.24	2420.27	1551.34	257.535	3196.55	3829.08	4979.13	6157.93	1746.21	-1902	783.045	3266.83	4693.21	-2039.37	5174
70	acceptor	40671.5	26413.9	28212.5	33123.5	27067.9	30281.1	32885.2	25916	28399.4	25192.1	29973.6	26392.4	32853.4	2054.6	-1944.68	1139.33	231.768	-3672.21	-2113.63	-5880.97	154.842	-4700.51	-1571.26	-1917.82	2591.72	-495.395	-566.123	1021.98	794.479	2583.7	-2858.18	2279.15	3.66	3668.43	1045.43	-3362.67	-3385.45	3486.8	-140.131	406.584	226.36	462.283	2336.27	-116.532	-1497.61	-1437.41	3553.45	799.072
70	fret	0.250157	0.191758	0.180008	0.198514	0.171671	0.186711	0.196822	0.190916	0.217248	0.196822	0.195132	0.190074
71	donor	16608.4	7516.25	12280.3	11124.6	15090.1	22555.4	12713.5	11767	10294.8	15390.3	12675.5	19863.7	12702.7	13343.7	11240	17939.3	13336.9	15460.9	13126.4	14977.4	10710.4	13588.1	34078.5	17567.2	13543.3	14344.6	15803.1	6471.91	23419.1	24160.6	19312.3	19110	18862.8	3981.23	3971.73	9823.59	6489.56	14326.9	11058.1	58045.5	78693.4	74983.2	64443.3	68741.5	69197.8	80748.1	74604.3	65415.7
71	acceptor	60360.3	53576.8	66146.1	53206	49219.4	51076.8	57900.3	50594.6	55721.4	50010.7	48701.3	58097	65570.8	57989.2	60976.3	66085.3	62370.7	63033	63005	58622.8	60172.4	63485.4	54762	62334.9	54920.8	56120.3	49968.7	56749.5	42555.4	55339.4	62055.2	43065.6	53064.1	67363.9	69302.6	58704.6	61822.7	66930.7	63199	18110	9532.83	5885.23	2542.93	1197.19	1885.66	1611.21	4686.77	3602.83
71	fret	0.784158	0.876811	0.843522	0.827301	0.764899	0.694152	0.819646	0.81103	0.844475	0.764899	0.793767	0.745588	0.837799	0.812945	0.844475	0.78608	0.823477	0.803363	0.827301	0.796647	0.84924	0.823477	0.616776	0.78031	0.802404	0.796647	0.760076	0.897653	0.645279	0.6961	0.76297	0.692204	0.737848	0.943851	0.94573	0.856856	0.905217	0.823477	0.851145
72	donor	24782.2	26771	26433.2	25185.3	24076.9	26804	30136.3	32262	38178.8	39291.7	39234.1	40713.3	21747.1	28247.7	25601.7	33167.6	29409.4	35659	30255.5	25829.2	34295.7	34461.2	30347.4	28279.4	29908.2	25937.6	23468.4	30690.9	23228.2	39675.8	27996.7	26287.4	60462.8	58624.2	58208.5	70926.9	63725.4	58036.1	65476.5	61253.7	54272.8	55019.3	65994.3	69996.5	61517.4	67313.8	62157.5	61364
72	acceptor	31636.7	29532.9	39122.3	35970.2	35262	38263.4	33409.1	33195.9	38189.2	40409.6	33514.9	37462.8	39728.5	34515.3	35611.3	38453.8	35170.6	28330.8	31941.2	37309.8	27143.9	33577.2	37465.9	34541.1	37605.5	36394.3	41607.9	35335.1	32943.2	27499.5	39601.4	35641.3	731.398	941.661	-5508.02	186.09	-4016.8	-2511.44	-2531.22	-1663.96	1262.97	445.444	-691.601	2604.09	-2076.39	-2289.85	-4691.51	-3735.17
72	fret	0.560367	0.524308	0.596478	0.58845	0.594471	0.58845	0.525309	0.507296	0.500295	0.507296	0.460321	0.479301	0.646712	0.550347	0.581426	0.537324	0.544336	0.442352	0.513299	0.590456	0.441354	0.493295	0.552351	0.549345	0.557362	0.583433	0.639673	0.535321	0.586443	0.409441	0.585439	0.575408
73	donor	26818.4	23177.3	22830.2	31968.8	11193.9	16770.6	25696.6	30455.6	33069.1	36363.2	30381.6	44760.6	40038	44919.3	26930.1	23821.6	18777.5	26054.4	40952.7	25485.4	20676.7	20970	15000.5	23879.4	18036.3	21280.7	20320.3	18925.4	14323.9	34184.2	35895.1	27617.4	38694.3	30396.4	28478.3	39346.6	39057.4	28042.5	38731.9	38666	32665.5	32605	32592.9	34190.9	33406.7	40469.8	36698.1	47098.4
73	acceptor	16381.8	14326.8	15413.6	19939.8	11673.8	17939.1	14310	20031.1	14814.9	18474.8	13915	11889.5	14636.9	23236.1	12585	16590.1	20303.3	20212	20080.3	9595.21	13752.8	13472.9	17714.9	14903.2	11082.3	13737.2	17663.6	15764.2	12470.2	21398.2	12134.7	14376.8	16863.8	10847.8	20241.3	12264.5	10633.7	14057.7	10858.6	12846.2	15038.6	16046	17640.5	14581	14406.7	13541.8	15607.4	15798.8
73	fret	0.379454	0.382317	0.402696	0.384232	0.510992	0.516737	0.3579	0.396784	0.309018	0.337017	0.314177	0.210131	0.267569	0.340602	0.318508	0.41062	0.519048	0.43701	0.32902	0.273211	0.399719	0.39095	0.541355	0.384232	0.380407	0.391918	0.465492	0.454811	0.465492	0.385192	0.252506	0.342402	0.3039	0.262772	0.415619	0.2378	0.213808	0.33434	0.218976	0.24938	0.315041	0.329904	0.351475	0.298822	0.301356	0.250941	0.29798	0.250941
74	donor	27512.6	27988.4	29938.1	31720.5	19994.6	23131.6	35736.3	30803.8	23809.6	22247	25330.1	22213.5	25439.2	19687.6	17646.2	31074.4	26824.4	20809.4	32126.4	24935.8	20483.5	33390.8	30990	19383.5	36295	25750.6	31452.7	26064.9	19435.9	27081.9	29583.1	26047.4	21337.6	22994.8	30697.6	31454.2	30521.5	29993.4	30966.8	27166.3	26724	23406.6	22759.1	34514.1	31953.3	28829.4	22228	28922.5
74	acceptor	28696.1	28440	25092.8	28948.1	28898.3	24434.6	29726.6	20228.2	32841.3	29462.8	34604.9	31912.3	35960.8	34299.2	36454.5	38191.9	34907.5	32729.3	36491.2	28558.6	29558.9	22102.6	27967	27545	33515.5	24019.6	17859.2	22875.7	31916.9	30057	27879.1	35811.8	35780	34092.8	30539.6	26596.6	29860.2	32534.5	31395.9	33577	28923.6	30870.6	36369.5	38057.6	20956.6	31897	37398.9	33878.9
74	fret	0.510181	0.504134	0.456147	0.477055	0.590856	0.513209	0.454163	0.396162	0.579505	0.570246	0.577445	0.589823	0.585692	0.635601	0.673525	0.551806	0.565114	0.611594	0.531428	0.533459	0.590856	0.398111	0.47406	0.586724	0.480053	0.483053	0.362237	0.467082	0.622011	0.526355	0.485055	0.578475	0.626187	0.597064	0.499102	0.458133	0.494078	0.520286	0.503127	0.552828	0.519274	0.569219	0.614715	0.524336	0.396162	0.525341	0.627231	0.539569
75	donor	4864.55	13736.2	8247.05	3320.62	11827	11732.7	10533.5	8488.66	6340.71	4911.7	7433.84	4944.11	2395.45	8105.62	11947.8	7805.09	3960	7386.7	10253.6	13739.2	12304.3	3282.32	9293.04	10931.2	13736.2	6985.98	14307.9	167.947	5945.89	4885.18	6320.09	5875.18	-1187.41	5583.48	7041.96	11815.2	5636.52	9885.27	10244.7	6605.89	6549.91	9735	11747.4	8029.02	11167	12516.4	6343.66	12413.3
75	acceptor	27917.7	33664.2	40923	31475.2	33084.3	36394.4	31635.1	35009.2	33408.6	32055.3	35362.9	25567.2	33064.1	39858.7	31837.4	31788	33495.5	36464.6	33844.7	35725.5	41948.6	27238.6	40892.2	32487	31922.1	38995.4	32903.3	37292.8	32745.1	34060.2	31327.8	29651.2	38644.3	42120.3	31035	39519.9	38018.4	33614.9	34458	29486.5	40585.1	32365.8	30684	36441.6	41879	30001	26865.2	26931.2
75	fret	0.852207	0.710026	0.832061	0.904907	0.737062	0.756126	0.750146	0.804734	0.840847	0.86747	0.825813	0.838332	0.932515	0.83081	0.727609	0.802271	0.8945	0.832061	0.766917	0.721728	0.772983	0.891908	0.814621	0.747759	0.699564	0.848412	0.697248	0.99588	0.845887	0.875151	0.832061	0.834567	1.0319	0.882865	0.814621	0.769357	0.871306	0.772983	0.770565	0.817102	0.861094	0.769357	0.722903	0.819586	0.790007	0.705368	0.808435	0.684565
76	donor	38673.4	41902.3	32397.9	31252.1	46572	42662	39221.3	49188.6	34276.8	43170.5	34801.1	35071.1	31956.8	34683.4	31889.3	33076	29553.7	29847.2	30641.5	34975.3	29307.2	33537.5	33853	32864.1	29280.6	29015.3	32277.1	41593	36653.3	41724.9	26240.1	44311.7	38325	31030.7	35659.7	47429	44437.3	24496.2	31106.1	37425.6	37510.3	28141	28228.9	36901.3	34079	30417	35771.1	28996.5
76	acceptor	36020.9	37117.4	41140.5	56532.8	45891.9	29311.8	55210.5	29437.8	44926.2	32421.8	43836.2	35999.2	34606.4	46084.8	43637.7	32399.4	30287.2	45772.7	48575.7	37994.2	31915	33891.7	26318.1	38467.6	44122.7	39336.9	46857.3	51269.6	31445.2	41701.6	30394.6	38481	35895.6	41099.4	37271	23281.6	38725.3	37831.8	34818.8	40910.7	42645.1	43497.7	45364.9	45987.2	41159	39327.7	46602.6	36830.6
76	fret	0.482369	0.469399	0.559905	0.643845	0.496375	0.407031	0.584325	0.37468	0.567015	0.428719	0.557876	0.506404	0.519473	0.571083	0.578209	0.494372	0.506404	0.605793	0.612969	0.52048	0.521487	0.50239	0.43762	0.539642	0.600673	0.575153	0.592492	0.551792	0.461435	0.499382	0.536616	0.46442	0.483368	0.570065	0.511427	0.328977	0.465415	0.606817	0.528541	0.522494	0.531568	0.606817	0.616048	0.554833	0.546722	0.563967	0.565999	0.559905
77	donor	18565.8	28495.1	46624.1	36754.3	35199.2	41369	33036	37720	42939.3	42777.8	22456.4	62043.7	69374.1	49214.2	53175.3	28573.1	60511.2	24851.5	27670.4	36307.8	45516.5	44434.9	46319.5	26829.4	38895.8	49307.4	29549.6	50163.6	57868	73387.3	70708.2	113772	141078	132964	126242	143236	165666	141520	136278	117636	117369	137529	127594	124434	123566	131072	98782.8	119880
77	acceptor	101704	88124.1	66736.4	80063.1	79705.8	69953.7	76282.9	84804	74172.1	90981.4	122117	73888.2	78322.1	77559.9	86224.7	96888.1	71538.7	88334	85588.1	74416.8	81447.2	74345.2	74871.2	79386.8	78693.2	71955.1	89441.1	68430.3	59165.1	57786	61489.4	36524.7	-1903.88	1768.7	867.138	-2447.64	1706.76	-4066.49	-6000.95	-39.906	2209.89	1114.88	6377.66	-5138.01	2601.42	-2927.62	2328.52	1835.15
77	fret	0.84515	0.755579	0.588234	0.685074	0.693969	0.628342	0.697802	0.692694	0.63316	0.680024	0.84515	0.544017	0.530778	0.611646	0.61877	0.771858	0.541798	0.780084	0.755579	0.67249	0.641644	0.625941	0.617579	0.747526	0.668743	0.592876	0.751545	0.576687	0.505869	0.440587	0.464973
78	donor	89776.9	71383.2	75289	101400	53427.4	58719.8	33931.3	60898.3	65329.2	37283.2	58444.3	51866.8	48475.8	47575.1	82948.5	132994	-1427.6	1901.03	-1257.91	-3720.66	1114.92	-2222.41	-1500.12	5.37619	-1668.37	-3742.42	-4461.81	5344.24	292.553	-3220.28	-499.357	-587.831	-5366.85	-1898.98	-1958.44	164.918	-2933.1	-3028.83	-300.654	830.646	4511.72	659.5	249.041	476.751	-1020.05	-3523.41	-351.418	3960.58
78	acceptor	23947.4	41836.4	39293.9	13049.4	61312.8	53812.3	82847	58009.9	53748.9	68255.7	56871.5	62572	63049.3	63548.3	39724.6	-7721.94	386.834	-2574.68	-154.54	-510.085	-1808.6	-365.058	-4195.67	505.495	895.242	-2348.11	748.496	-2636.05	772.195	-1051.41	778.218	2626.99	-2430.72	-87.686	1316.4	-1468.39	-1102.02	-2605.92	-4268.23	966.077	-945.455	-793.24	3328.08	-4867.68	29.522	51.238	-318.096	157.161
78	fret	0.210483	0.369328	0.342789	0.113815	0.534787	0.47789	0.709165	0.487942	0.450977	0.64663	0.492986	0.547173	0.564838	0.572153
79	donor	47584.2	49783.5	41562.1	46879.2	50584.5	48782.7	31983.6	34437.4	50173.2	42018.4	43072	48226.5	48524.2	56831.7	37394.6	41333	45972.4	38977	65842.3	75652	61960.8	62928.2	62620.8	67134.9	74110.7	63239.6	78622.9	69508.5	62389.7	67512.9	61016.9	69005.2	75669.6	51250.3	54385.7	50302.4	45557.2	46277.9	44409.6	50292.7	62810.7	57861.9	46857.6	47163.1	44805.2	76425.5	44117.8	54797
79	acceptor	50764.2	62016.6	57015.2	43778.6	46476.6	64192.8	62469.9	60241.8	40857.8	64451.4	53432	55013.6	53048.8	49794.1	51358.2	55535.6	57061.9	61603	32443.7	22368.9	29248.6	25225.5	35938.6	25554.2	28003.6	31425.8	32426.8	34112.4	24342.7	23284.7	29978.3	38170.9	23330.5	48500.7	57158.3	42581.4	65397	56749.9	58926.1	60695.3	37903.5	47850.3	57396.1	48844.6	58589.3	22605.3	63466	45785.9
79	fret	0.5162	0.555103	0.57799	0.483186	0.479178	0.568043	0.661204	0.636497	0.449077	0.60579	0.554107	0.533173	0.522193	0.467146	0.578984	0.573019	0.554107	0.61273	0.329962	0.228108	0.320829	0.286267	0.364402	0.276084	0.274046	0.33199	0.292375	0.328947	0.280158	0.256712	0.328947	0.356308	0.235265	0.486191	0.512203	0.458115	0.588917	0.551119	0.570033	0.547133	0.376534	0.453095	0.550122	0.509204	0.567048	0.228108	0.58991	0.455103
80	donor	59799.2	58248.9	62201.1	59635.2	117250	133698	154412	145113	142425	119303	114656	139820	128460	128675	148373	111469	125940	104014	133344	61478.5	960.447	1409.5	644.76	-438.727	-4239.81	-433.221	-1533.23	-673.657	357.828	2058.62	-1847.08	-2457.65	829.523	-3240.75	1495.77	1108.5	-2011.65	-649.796	-1444.52	-2817.38	-2458.87	2483.2	3263.24	1166.62	1463.34	1715.4	4369.36	1660.34
80	acceptor	64665.5	60383.6	64189	58798.8	7192.07	-2527.68	-2739.53	835.611	-2581.44	-4444.83	-306.369	557.768	1378.2	-5039.28	-6640.12	45.609	1047.29	807.02	-853.461	-2024.29	1155.15	1808.39	-893.012	-1617.93	-1474.54	83.463	-109.915	1097.04	-3177.3	-3942.61	1147.56	-2860.54	1199.87	2469.58	-2063.84	304.326	-1733.1	204.166	-1027.17	-1075.97	-501.715	2530.8	-1873.73	7490.26	1793.92	3133.26	-114.727	4398.14
80	fret	0.519829	0.508699	0.507689	0.496597
81	donor	13333.8	14577.5	17622.3	13159.8	23365.4	21490.6	15170.3	17654.9	30585.5	58613	55565.3	72296.4	87780.9	51207.5	49487	62393.6	50913.2	78927.9	51518.8	39728.5	37676.9	61154.1	74367.7	48619.7	59466.2	78192.2	60685.8	37246.8	66034.1	50560.9	40220.9	59174.7	27414.8	77165	68163.5	44957.9	39864.3	64029.2	47142.5	46310.6	21944.8	34479.3	59405.3	68926.1	52521.9	61237.6	70700.4	71068.2
81	acceptor	96633.2	64336.3	80159.2	79223.4	77015.2	81969.9	89436.6	47927	24820.1	13180.9	9119.57	17924	5307.2	27228.4	34979.8	7145.4	18625.5	18721.6	20720.2	22298.7	28342.2	16458.5	14140.5	41645.4	34148.9	23097.3	25349.5	23027	17168.2	41431.1	36610.2	23497.8	54281.8	30104.4	27807.7	31095.2	52754.1	22688.1	36304.3	49280.4	68301.9	45457.4	29597.6	27073.7	41865.3	35958.5	26703.2	27501.4
81	fret	0.879161	0.81547	0.819398	0.857631	0.767296	0.791892	0.854693	0.730828	0.448267	0.183366	0.140517	0.198643	0.0565497	0.347644	0.414123	0.10268	0.26773	0.191515	0.286984	0.35975	0.429194	0.211872	0.159914	0.461304	0.364792	0.228141	0.295084	0.381922	0.206785	0.450273	0.476335	0.283945	0.664591	0.280906	0.290023	0.409095	0.56923	0.261645	0.435219	0.515353	0.756462	0.568234	0.332499	0.281919	0.44325	0.369832	0.273812	0.27888
82	donor	41384.6	39051.3	33205.5	44609	46128.3	44224.3	35326.3	44453	41253.9	49531	44567.4	47329.9	52486.6	33091.1	33117.8	35878.8	32584.6	43337.6	34280.8	42921.8	39318.6	37136.8	48317.6	52846	35277.3	38991.9	37779.9	38299.8	41178.1	47059.6	50475.6	79917.1	89459.6	80539.4	73462.3	75884.7	78007.1	76021.4	74681.7	86891.7	81712.7	70356.7	84751.5	77870.5	70579.5	75354.5	75999.1	83319.7
82	acceptor	42561.2	31062.6	34339.7	28093.5	21542.3	36354.4	36211.2	31732.9	33103.4	19952.8	33188.4	22247.4	38042.5	36074.8	37104.4	33834.6	41307.7	30770.9	30555.5	37208.8	32118.5	38511.4	31702.3	26331.8	31211.7	32895.2	30234.7	36749.6	33152.7	26983.3	26086.4	-5594.05	-5415.23	-5774.82	-2224.04	-4246.84	-408.814	1103.88	-790.406	-3582.31	-5654.54	702.078	-1705.42	-1609.88	-3339.36	721.296	-3559.45	-1900.74
82	fret	0.50685	0.44292	0.508872	0.386217	0.31835	0.450832	0.50584	0.41638	0.444896	0.287369	0.427162	0.319294	0.420296	0.522036	0.528137	0.485713	0.55885	0.415402	0.471708	0.464732	0.449842	0.508872	0.395911	0.332549	0.469714	0.457774	0.444896	0.489727	0.445884	0.364049
83	donor	37219.2	30578.2	26806.2	30925.5	31948.6	37138	36877.8	30373.4	42217.9	34320.8	35469.8	36638.8	34253.7	37942.1	35303.8	35624	31689.6	39890.5	34530.3	36817.8	42864.3	32737.3	31122.1	33970	36036.1	38440.1	35675.8	30432.2	37302.8	33468.4	32399.5	36912	36787.2	37215.7	34711.6	33967.6	35491	36914.3	39988.2	31206.9	33149.4	33326	37175.7	40884.1	43907.3	29530.4	32928.1	29174.9
83	acceptor	54316.3	50830.9	53037	49171.6	51885.3	46298.1	48583.9	37569.6	43527.4	53695.4	52866.5	56332.7	53518.2	47236.7	47099.1	55159	53025	36184.9	49350.5	45912.6	46867.7	48983.5	54424	46300.9	45571.3	51734.9	63073	51715.3	47836	47546.6	44999	42902.1	40273.3	47158.3	44289	50749.1	46598.8	51205.4	33574.1	40428	59189.6	44289.6	44357	43322.5	44137.5	45781.7	49390.6	51056.8
83	fret	0.592956	0.624654	0.664236	0.614147	0.61893	0.554794	0.568582	0.552817	0.507767	0.610312	0.598759	0.605507	0.609352	0.554794	0.571523	0.60743	0.625622	0.476109	0.588106	0.554794	0.521896	0.599724	0.636049	0.576416	0.558744	0.573482	0.638887	0.629426	0.561701	0.587134	0.581295	0.537917	0.522901	0.558744	0.560716	0.598759	0.5676	0.581295	0.456448	0.564653	0.640777	0.570543	0.543891	0.514845	0.50168	0.60743	0.599724	0.636049
84	donor	23283.4	9832.51	23487.6	15225.8	15488.9	33138.7	19574.9	39693.9	30643.1	23608.3	35951.4	36667.7	36738.9	21699.1	30434.3	26085.2	24556.7	14822	50879.8	32572.4	29653	27632.4	38621.7	35252.1	40838.8	37218.5	34811.1	25139.9	36576.4	24171.4	22488.1	33915.3	30887.6	42223.5	35997.8	32854	43923.8	36151	37234	28118.2	29140.8	40854.3	39308.7	36593.4	53802.3	37475.3	23625.3	31139.8
84	acceptor	39928.1	38356.9	48824.9	44154.4	48278.4	32617.8	44164.3	21491.5	30569.1	34480.2	23229.7	23149.9	23930.8	24179.9	25206	25966.5	37233.8	38972.2	31080.6	25002.8	26604.6	19177.9	14061.6	16142.9	18231.3	36698.2	20245.3	31585.9	25530.8	23079.6	25987.7	24898	31085.5	11297.4	22321	20994.8	11541.8	19161.4	9521.78	29605.1	20003.7	18039.9	22330.8	27124.3	6397.89	16975.8	25486.8	16909
84	fret	0.631277	0.795656	0.675068	0.743305	0.75681	0.49604	0.692721	0.351458	0.499137	0.593192	0.392827	0.387109	0.394739	0.527327	0.453403	0.499137	0.602063	0.725041	0.379522	0.434547	0.472509	0.410133	0.267263	0.314056	0.308673	0.49604	0.367287	0.557178	0.411101	0.488841	0.535791	0.42375	0.501206	0.211344	0.382362	0.389965	0.208034	0.346838	0.203909	0.512638	0.407233	0.30599	0.362611	0.425706	0.10662	0.311362	0.518914	0.351458
85	donor	38972.4	50641.2	59753.6	51726.9	64887.8	39066.4	48976.7	43745.2	49968.4	41385.8	50423.7	40968	48132.2	37047.9	40502	46954.9	48788.7	46250.2	49906.2	36132.2	70204.3	47965.4	41917.2	44399.3	48072.5	47232.9	41454.5	46013.9	44398.4	49685.5	39834.1	48979.1	46388.3	37862.2	39609.3	35175.7	24088.2	45231.5	38553.8	31944.8	42643.2	51197.1	49471.3	42628.5	57085.9	52816.7	49553.1	54437.1
85	acceptor	15476.5	8214.35	7157.87	11741.1	5812.08	21159.1	9910.89	27452.5	21675	20108.5	8347.74	4020.95	2512.27	23301.8	16478.8	13162.6	21332.7	14138.1	10788.3	16934	8586.01	21917.2	13304.3	19001.2	12829	10810.6	14576.7	19727.4	12475.6	15875	18807.9	10472.5	13986.7	19136.2	23704.1	14142.9	27529.9	16617.9	18385	21680.5	8307.71	9333.57	11533.3	13558.6	5436.55	5444.69	8222.21	15623.3
85	fret	0.284388	0.13911	0.106514	0.185336	0.0826242	0.35105	0.167972	0.38556	0.302963	0.327465	0.141992	0.0893071	0.0492898	0.386548	0.289272	0.219198	0.303942	0.233751	0.177614	0.318636	0.109385	0.313735	0.24055	0.300028	0.210478	0.186302	0.260006	0.300028	0.219198	0.242494	0.320597	0.175685	0.231809	0.335318	0.3747	0.286341	0.532996	0.268776	0.322559	0.404351	0.163155	0.154491	0.189199	0.241522	0.0873973	0.0931279	0.141992	0.223076
86	donor	34076.9	34993.4	29155.6	30429.6	30801	39012.1	32159.5	40356.7	40191.4	31672	37659.3	38101.2	35809.6	75418.5	82257.2	77251.5	88016.1	90356.9	82451.3	78350.9	74083.3	74424	71267	80503.2	74517.8	76855.9	79380.6	73653.3	77596.9	72611.5	80729.8	82508.9	85993.7	81120.7	72471.3	80284.1	73317.2	80752.1	83906.3	85414.3	80132.7	79094.6	81063.1	72722	76633	71996.8	78326.7	74562.4
86	acceptor	43840.5	43015.1	45938	45398.9	43318.1	50472	53031.3	42233.1	42617.2	35412.3	43688.7	41308.9	43709.6	-2571.26	1792.19	-244.179	-2232.01	754.323	-1940.41	-1578.23	2400.33	-2019.87	-1701.39	-2908.92	-732.037	-2591.02	-1202.86	-1401.63	-2991.66	-2826.15	-4131.28	-1358.69	-3272.49	-3840.74	500.765	-804.878	1385.98	-1941.38	-3429.19	-1942.96	-2106.87	-3908.27	-5572.12	1350.33	-4462.85	-929.419	-2537.63	-6450.02
86	fret	0.56253	0.551655	0.611522	0.598861	0.584174	0.564503	0.622205	0.511812	0.514817	0.527805	0.536769	0.519818	0.549674
87	donor	21080.9	28489.5	32477.1	28325.8	26892.8	33153.6	31258.7	35204.4	25580	35540.8	34593.1	32135.3	17766.8	11867.6	19185.4	21016.9	22836.5	23502.2	23201.7	35619.7	27400.8	34879.9	29938	25522.6	28891.1	33300	29527.5	23294.9	33798.3	29567	33208.5	29564.6	30654.5	28916.2	29348.8	28946.1	28804.5	28927	22184	34386.3	43253.7	44816.9	43229.2	27911.1	22988.3	23103.7	24600	24022.1
87	acceptor	58560.7	53648.6	55469.2	52628	50142.3	50766.3	49174.6	50833.3	49609.8	58738.8	54732.3	45459.8	55495.3	51794.3	61797.3	64222.2	62042.7	59765.9	59630.9	58939.6	55522.9	46061.2	51683	55496.3	52525.6	51911.5	52016.6	54851.1	54010.1	57714.4	44389.5	49386.5	45881.1	61475.1	48867.5	43702.5	52216	49892.7	49912.3	51155.5	32049.6	33749.7	36776.1	40333.8	46658.8	47738	52530.2	49269.7
87	fret	0.735093	0.652852	0.630736	0.649977	0.650935	0.60458	0.611385	0.590915	0.659552	0.623007	0.612346	0.586024	0.757395	0.813347	0.762945	0.753689	0.731361	0.717321	0.720134	0.623007	0.669097	0.569335	0.63363	0.685256	0.645178	0.609442	0.637484	0.702274	0.615257	0.661463	0.572287	0.625907	0.5997	0.680513	0.624941	0.601659	0.644217	0.632666	0.691886	0.59775	0.425327	0.429445	0.460166	0.590915	0.67005	0.673859	0.681462	0.671955
88	donor	22564.5	19690.5	19138.5	17766.1	20163.4	16279.9	11788.4	20294.6	17843.3	22413.9	19895.1	24961.7	21454.6	22800	24154.9	19607.5	14129.7	21089.8	22510.4	25172.1	15505.9	24481.1	28078.9	35187.7	26471.1	29009.3	22682.2	13558.4	18659.8	31041.7	18877.9	19016.9	24506.2	21080.2	21653.4	24786.1	21817.5	20659.4	18551.7	26604.3	22888.7	18347.1	23548.9	19115.3	26399.7	22938.9	24228.3	13178.1
88	acceptor	28818.7	30933.7	31818.4	28897.2	29548.5	23522.4	26321.3	29445	21324.1	30437.9	19720.7	28255.8	20508.1	32832.9	21108.5	25500.2	28838.1	21259.9	28959.8	27036.5	28134.1	27391.6	27222	23113	24084.2	32714.8	26030.8	29351.5	21415.1	18845.4	27617.6	28572.8	25589.2	22021.6	25080.1	24965.1	19177.9	24191.6	26999.4	28295.9	23793.7	22651.5	26251.6	22259.5	23432.1	28794	27015.4	29757.1
88	fret	0.560976	0.610841	0.624789	0.618812	0.594893	0.590905	0.690458	0.591902	0.544004	0.575945	0.498032	0.531019	0.48903	0.589908	0.466011	0.564968	0.671567	0.502032	0.562972	0.518028	0.644703	0.528021	0.492031	0.396854	0.476021	0.53002	0.534016	0.684494	0.534016	0.377784	0.593896	0.600874	0.511031	0.511031	0.537013	0.502032	0.468014	0.53901	0.592899	0.51503	0.510031	0.55299	0.527022	0.538011	0.470016	0.556984	0.527022	0.693441
89	donor	41678.3	32606.1	40259.5	43407.5	43113.5	37644.1	35711.7	43508.8	39987.7	40222.3	39458.3	39622.3	43910.8	37561.1	41516.9	37480.8	34991.5	38219.9	39959.6	34176.6	41507.1	36622	36946.2	38855.1	39396.9	37091.3	38037.6	38091.1	39183.2	39692.3	42466.5	37866.3	38421.2	34142.6	39826.9	60295.8	104265	100613	99686.8	100786	92952.9	86956.9	90673.4	103740	92968	92571.9	97867.4	102354
89	acceptor	62641.7	61221	64202.4	57538.2	62875.5	63215.9	61419.5	61520.2	58391.5	65409.3	60038.2	63075.7	59221.8	57302.1	56011.2	57227.7	62695.3	64284.1	57256.1	56092.8	64728.7	64243.5	58538.2	66177.3	55596.7	56377.1	60814	65436.2	60232.7	58580.9	62805.6	72950	68526	66235.2	61724.7	39997.3	-5311.02	-155.457	-4432.25	-2703.15	-2374.04	-4907.85	-1889.3	-893.054	-1193.57	41.654	-2292.87	-4127.68
89	fret	0.600104	0.652826	0.615037	0.57021	0.593132	0.626977	0.63195	0.586158	0.593132	0.619018	0.603091	0.614042	0.574198	0.604087	0.574198	0.604087	0.641893	0.626977	0.589147	0.621008	0.609065	0.636922	0.613047	0.629961	0.585161	0.603091	0.615037	0.63195	0.606078	0.59612	0.59612	0.658787	0.640899	0.65978	0.608069
90	donor	27901.5	35299.4	30326.1	29061.8	16331.8	18974.4	11636.8	19983.8	22321.2	15936.1	16315	22965.1	24259.6	27126.8	52519.9	51158.4	57654.2	50977.3	66095	46175	57201.4	51923	52412.6	49723	58599.9	35054.6	47083.8	41235.2	47181	39719.4	35641.5	41641	36308.8	32905	49857.2	44947.6	53009.5	46268.9	45849.7	50880	42395.5	52734.5	51091.3	55403.9	55414	51678.2	51077.9	46178.3
90	acceptor	27024.8	23889.4	22877.7	33142.6	28092.2	20401.7	22614.1	20566.1	16895.9	20265.1	23429.1	20724	24583	25842.2	7187.03	4058.6	7509.73	5454.52	510.006	-4602.45	-2175.97	711.1	-3411.06	942.142	3059.86	8674.22	8138.75	2204.3	-1028	-2406.04	6302.86	4613.55	-1779.84	-325.297	-2774.04	-1287.09	2738.71	-946.34	6719.23	-1980.42	-4530.13	709.796	-4576.12	-493.212	-4594.59	4422.27	8515.7	2387.61
90	fret	0.492241	0.404042	0.429609	0.532509	0.631857	0.518374	0.65994	0.507297	0.430596	0.559926	0.589574	0.474247	0.503277
91	donor	6217.72	2716.97	1060.6	5689.48	7683.08	6814.61	5898.39	4119.66	8381.44	4376.32	3854.04	5429.83	8987.29	1433.66	4689.69	4979.18	6089.39	9375.26	-885.256	7414.48	8939.53	7775.6	5680.52	362.241	5635.75	4552.4	10745.1	7647.27	6169.97	3418.31	2137.99	7712.93	8981.32	11509.1	6017.76	1409.78	4570.31	1403.81	6164	-503.248	7656.22	3146.73	6357.99	7259.29	6507.21	11703.1	6232.64	4940.38
91	acceptor	41810.7	39053.2	47782.6	37177.8	48959	32712.5	31533.5	52042.8	33298.9	40438.7	34971.1	34193.7	30247.7	23712.6	45326.7	45572.9	39931.3	49312.5	30853.9	41498.8	43681.2	32685.6	45540	38625.8	40717.2	45563.5	38236.9	36441.4	36298.6	29327.2	45486.7	36386.2	39321.1	23009.6	40226.2	38551.6	29320.8	45742.4	42711.9	44003.8	37083	47987.4	33750.5	41557.5	30449.7	39948	37424.2	38460.9
91	fret	0.870154	0.935307	0.97817	0.867269	0.864383	0.827748	0.842226	0.926711	0.798722	0.902788	0.900872	0.86342	0.770577	0.942942	0.90662	0.90183	0.867269	0.840297	1.02934	0.848011	0.82968	0.807439	0.889365	0.990515	0.878804	0.909493	0.780292	0.826786	0.854756	0.896079	0.955335	0.824854	0.814214	0.666965	0.870154	0.964856	0.865345	0.970565	0.873999	1.01137	0.828714	0.938171	0.841262	0.850903	0.823887	0.773492	0.857645	0.886486
92	donor	20878.2	18863.1	30397.5	26255.4	20660.8	38542.5	25868.7	33622.2	35199.5	36987.6	32510	30111.4	35442.3	30240.9	31007.9	34312.6	37590.1	35324.1	32222.4	25133.7	19718	31038.3	20785.5	17220.4	29159	32442.9	31453.7	39268	27928.6	34291.8	35322.5	26766.8	29379.5	33603.1	29494.6	26250.7	28131.5	27239.8	27949.3	25630.6	31046.3	21798.6	21942.4	31966.7	17850	20601.7	20437.1	20363.6
92	acceptor	46164.2	39510.9	34736.8	33324.9	33503.5	31126.4	41180.5	32349.6	33180.7	32331.9	37632.7	49432.5	36253.3	39787.3	40556.4	30011.7	40426.6	37222.6	30243.8	39130.6	33306.8	40509.9	35219.7	41834.7	34567.3	27522.7	36994	34474.1	38424.4	28411.8	31221.7	31309.7	42743.1	27441.4	35178.1	34720.9	37258.4	42152.8	37197.2	34428.8	40925.8	26083.3	43409.2	34735.6	34489.7	29281.7	34179.8	30135.8
92	fret	0.688424	0.676683	0.533427	0.559303	0.6187	0.447242	0.613767	0.490449	0.485437	0.466362	0.536417	0.621659	0.505467	0.56824	0.566255	0.466362	0.51846	0.513466	0.484434	0.608831	0.628557	0.566255	0.628557	0.70796	0.542393	0.459323	0.540401	0.467367	0.579154	0.453285	0.469377	0.539405	0.593015	0.449257	0.544384	0.569233	0.570225	0.607844	0.571217	0.573201	0.56824	0.544384	0.663943	0.520458	0.659037	0.58708	0.625602	0.596972
93	donor	37630.2	45969	42051.2	31356.9	40478.2	36318.1	50449.5	38259.1	50444.2	39698.3	51655.7	45777	32413.5	26816.8	51944.4	32781.6	37374.7	58767.1	81657.1	79377.1	75401	98385	86329.7	99747.5	76631.1	90562.6	74623.8	92820.1	87995.3	92554	84106.6	91256.4	85340.6	96906.1	87741.1	93127.3	77075.9	85801.4	84613.7	83055.3	72788.7	93509.9	80400.6	86781.2	82096.7	89553.7	90459.3	85086.4
93	acceptor	38797.3	55108.9	46477.1	43963.1	60138.1	39627.7	41963.1	45683.2	37390.6	41360.4	44015.6	41255.7	40959.7	49455.4	37094.7	44241	47150.4	14580.3	-5969.47	720.038	-6689.42	-1490.27	-5914.34	-5224.59	2776.2	2015.44	184.661	5309.17	8802.03	420.119	4552.34	-1807.94	-2395.47	-1845.57	-199.666	-1066.13	3252.46	-2464.57	-529.033	-4736.06	2390.19	2194.65	-4362.93	-2302.5	7193.39	1546.31	4599.1	11388.6
93	fret	0.507785	0.544987	0.524853	0.583424	0.59764	0.521838	0.453865	0.543978	0.426082	0.509791	0.459834	0.473783	0.558113	0.648668	0.416188	0.574301
94	donor	37183.8	29187.8	33692.8	31509.8	40428.4	42112.8	42896.4	32403.7	53278.9	44824.1	36924.5	38237.5	38816.5	38005.1	38998.3	42600.4	43937.2	42767.3	41596.4	42576.6	43028.5	51631.2	45729.9	44280.9	51039.3	48554.4	52230.1	48459.1	41439.4	29655.6	47689.4	51883.5	47853.3	37680.3	36985.1	45237.3	39828.5	41829.7	40185.1	49863.4	44157.7	38074.6	46492.6	51366.1	41394.7	41752.3	42685.9	38890
94	acceptor	46244.5	66005.4	48878.5	56454.5	37368	41356.6	48254.8	43121.8	44886.3	33679.6	30080.3	44445.8	49693.7	31002.8	51119.9	35333.5	37275.9	32252.5	34097.4	37949.1	41831.3	34979.5	41530	34565.7	31439.4	32541.2	30430.6	27936.3	42303.3	45561.9	34625.9	28392.2	28080.3	38461.5	42004.6	33012.9	36727.4	31013.4	34672.8	28996.6	22428.3	40404.4	35269.4	32622.6	43387.2	33273.1	32636.9	35955.9
94	fret	0.554499	0.693798	0.591981	0.641744	0.480548	0.495643	0.529661	0.571306	0.457296	0.428816	0.449179	0.537625	0.561428	0.449179	0.567357	0.453239	0.459323	0.429837	0.450194	0.471465	0.492629	0.404252	0.475504	0.437997	0.38161	0.401172	0.368174	0.366103	0.504675	0.605695	0.420644	0.353657	0.370244	0.504675	0.531654	0.421667	0.47954	0.425754	0.463374	0.368174	0.337006	0.514687	0.430857	0.388828	0.511686	0.44308	0.432897	0.480548
95	donor	50399.6	60375	72903.9	63220	62610.4	58725.4	64369	74877.1	53764.9	72869.2	60893.3	49719.1	61706.6	52786.8	55979.2	61979	57592	83454.2	79792.6	79639.4	78259.4	87104.9	87734.3	41270	72098.9	57099.6	61882.3	74203.5	56337.4	68437.2	57294.4	71783.5	49036	23371.3	55427.5	66972.2	45428.2	36858.5	48589.2	53497.2	73159.3	59868.3	32304	61517.9	69148.3	64781.8	60689.7	62590.6
95	acceptor	43316	37946.5	25425.2	25939.8	29745.8	39486.2	36578.5	26450.9	41717.6	32759.3	39880.4	44953	36816.8	38269.9	35415.7	33701	36128.4	20486.8	15974.2	20705.4	13436.1	25435.4	25012.3	50081.4	22761.9	37064.9	32224	20728.9	30558.1	31354.8	32026.1	23619.3	40320.7	59378.1	43945.9	29110.4	58551.4	57874	48520.9	35198.3	29042.6	44181.9	72371.5	35917.3	28307.5	34340.7	42254.3	28647.5
95	fret	0.46251	0.38613	0.258688	0.290814	0.322463	0.401596	0.362169	0.261424	0.436773	0.31031	0.395785	0.474483	0.373639	0.420096	0.387094	0.352653	0.385167	0.196658	0.166713	0.206433	0.146683	0.226111	0.221624	0.548647	0.239628	0.393851	0.34223	0.21804	0.351703	0.314042	0.35835	0.247776	0.451587	0.717376	0.442688	0.302857	0.563135	0.61136	0.499623	0.396752	0.284353	0.424989	0.69099	0.368853	0.290814	0.346015	0.410341	0.314042
96	donor	68436.3	52548.5	67446.4	65155.2	62225.5	53382.2	62816.4	68713.4	63147.4	65823.3	66195.6	55692.4	59540.6	59554.4	64722	55850	68264.4	70659.9	56492.8	65574.2	61288.5	66727	72048.3	70928	66645.1	62599.3	67527.4	71856.9	74102.9	65699.5	72066.4	70080	71439.8	91324	105160	99392.6	96246.8	94809.8	95566.4	103407	111365	92079.1	100757	95374.5	100349	98671.3	98551.3	98521.3
96	acceptor	30643.8	43866.1	32680.3	32618.3	31873.8	32862.7	29553.5	30564.5	36977.3	34240.8	32822.6	43511.5	31615.5	35136.3	33506.5	46031.8	35110.1	35493	42999.6	44456	38084.2	37062.8	35359.1	38531.7	37888.2	35544.9	35720.8	27492.3	27728.1	28451	30910.6	36861.3	30093.2	5139.08	-2490.85	-2263.97	-1093.46	-621.416	427.03	2439.12	-2662.95	-2537.91	1098.32	-702.9	772.947	-2127.98	-3022.26	525.74
96	fret	0.309034	0.454979	0.326741	0.334014	0.339201	0.381533	0.319458	0.307994	0.369185	0.342311	0.331937	0.438755	0.346455	0.371246	0.341275	0.451941	0.339201	0.334014	0.432661	0.404094	0.383588	0.356798	0.32882	0.35163	0.361962	0.361962	0.346455	0.276577	0.272374	0.301724	0.300679	0.344384
[truncated: 723 more rows]
[truncated: 562 more columns]

## Sheet: 242-378_intra_avitag
1	donor	14149.6	32846.7	113864	61615.7	18906.2	37274	6377.96	30208.5	32712.4	24841.1	45253.6	20821	22181.2	4116.63	-2481.05	8275.39	14236.3	42407.5	20621.7	39886.2	24277.9	65432.3	4021.33	35874.8	20218.8	3991.01	21687.4	14136.6	25833.1	19330.7	34142	42333.8	98455.4	80048.5	28324	23017.3	4125.3	25083.7	9631.32	15904.1	53852.7	74234.9	33357.9	11060.9	9518.68	12954	-886.865	23021.6
[truncated: 926 more rows]
[truncated: 562 more columns]

[truncated: 25 more sheets: 242-389_intra_avitag, 242-400_inter_liposome, 242-400_R304W_inter_liposome, 242-400_intra_liposome, 242-417_inter_liposome, 242-417_R304W_inter_liposome, 242-417_intra_liposome, 242-431_intra_avitag, 242-431_inter_liposome, 242-431_R304W_inter_liposome, 242-431_intra_liposome, 266-389_intra_avitag, 274-400_intra_avitag, 274-400_inter_liposome, 274-417_inter_liposome, 274-431_intra_avitag, 274-431_inter_liposome, 298-363_intra_avitag, 298-378_intra_avitag, 298-389_intra_avitag …]
