# Supplementary material for: Conformational dynamics of auto-inhibition in the ER calcium sensor STIM1
Source: eLife. 2021 Nov 3;10:e66194. doi: 10.7554/eLife.66194 (PMC8651296; doi:10.7554/eLife.66194)
Supplement: Figure 3—figure supplement 1—source data 1. [file elife-66194-fig3-figsupp1-data1.xlsx]

## Sheet: 242-400_inter_liposome
1	fret	0.492411	0.440628	0.448535	0.418994	0.334043	0.404336	0.323599	0.343571	0.348347	0.379102	0.305649	0.385874	0.338803	0.399466	0.441616	0.331191	0.357923	0.380069	0.460436	0.4141	0.222136	0.377171	0.245087	0.282202	0.370419	0.42586	0.329291	0.38297	0.286876	0.422916	0.325495	0.253395	0.486389	0.353131	0.334043	0.354089	0.390721	0.418994
1	states	0.373795	0.373795	0.373795	0.373795	0.373795	0.373795	0.373795	0.373795	0.373795	0.373795	0.373795	0.373795	0.373795	0.373795	0.373795	0.373795	0.373795	0.373795	0.373795	0.373795	0.373795	0.373795	0.373795	0.373795	0.373795	0.373795	0.373795	0.373795	0.373795	0.373795	0.373795	0.373795	0.373795	0.373795	0.373795	0.373795	0.373795	0.373795
1	clusters	0.530403	0.530403	0.530403	0.530403	0.530403	0.530403	0.530403	0.530403	0.530403	0.530403	0.530403	0.530403	0.530403	0.530403	0.530403	0.530403	0.530403	0.530403	0.530403	0.530403	0.530403	0.530403	0.530403	0.530403	0.530403	0.530403	0.530403	0.530403	0.530403	0.530403	0.530403	0.530403	0.530403	0.530403	0.530403	0.530403	0.530403	0.530403
2	fret	0.963178	0.950238	0.949242	0.916385	0.91041	0.973131	0.915389	0.959197	0.924351	0.658129
2	states	0.936797	0.936797	0.936797	0.936797	0.936797	0.936797	0.936797	0.936797	0.936797	0.936797
2	clusters	0.904234	0.904234	0.904234	0.904234	0.904234	0.904234	0.904234	0.904234	0.904234	0.904234
3	fret	0.948234	0.882222	0.919751	0.860177
3	states	0.900986	0.900986	0.900986	0.900986
3	clusters	0.904234	0.904234	0.904234	0.904234
4	fret	0.988903	0.983766	0.935383	1.00851	0.948422	0.966579	0.924909	0.99659	1.02882	0.976045	0.963129	0.865732	0.99403	0.952755	0.974326	1.00851	0.803519	0.957082	1.00597	0.953621	0.982909	0.824402	0.637755	0.944951	0.934511	0.926657	0.967441	0.957082	0.974326	0.490885	0.616504	0.452293	0.510005	0.92141	0.910886	0.631974	0.470633	0.760385	0.778816	0.934511	0.912642	0.960539	0.945819	0.971746	0.93364	0.954487	0.934511	0.934511
4	states	0.957082	0.957082	0.957082	0.957082	0.957082	0.957082	0.957082	0.957082	0.957082	0.957082	0.957082	0.957082	0.957082	0.957082	0.957082	0.957082	0.624239	0.957082	0.957082	0.957082	0.957082	0.624239	0.624239	0.957082	0.957082	0.957082	0.957082	0.957082	0.957082	0.624239	0.624239	0.624239	0.624239	0.957082	0.957082	0.624239	0.624239	0.624239	0.624239	0.957082	0.957082	0.957082	0.957082	0.957082	0.957082	0.957082	0.957082	0.957082
4	clusters	0.904234	0.904234	0.904234	0.904234	0.904234	0.904234	0.904234	0.904234	0.904234	0.904234	0.904234	0.904234	0.904234	0.904234	0.904234	0.904234	0.530403	0.904234	0.904234	0.904234	0.904234	0.530403	0.530403	0.904234	0.904234	0.904234	0.904234	0.904234	0.904234	0.530403	0.530403	0.530403	0.530403	0.904234	0.904234	0.530403	0.530403	0.530403	0.530403	0.904234	0.904234	0.904234	0.904234	0.904234	0.904234	0.904234	0.904234	0.904234
5	fret	0.722389	0.705039	0.718538	0.774111	0.721427	0.703108	0.747354	0.795992	0.707941	0.698277	0.739684	0.706976	0.694409	0.737765	0.798839	0.626275	0.773157	0.72816	0.758837	0.718538	0.784587	0.723351	0.788391	0.738725	0.763615	0.70021	0.74352	0.74352	0.736806	0.869544	0.880771	0.838548	0.760749	0.713727	0.756925	0.746395	0.778875	0.751184	0.770296	0.830071	0.816839	0.779827	0.712763	0.829127	0.703108	0.74352	0.680849	0.72816
5	states	0.739684	0.739684	0.739684	0.739684	0.739684	0.739684	0.739684	0.739684	0.739684	0.739684	0.739684	0.739684	0.739684	0.739684	0.739684	0.739684	0.739684	0.739684	0.739684	0.739684	0.739684	0.739684	0.739684	0.739684	0.739684	0.739684	0.739684	0.739684	0.739684	0.869544	0.739684	0.739684	0.739684	0.739684	0.739684	0.739684	0.739684	0.739684	0.739684	0.739684	0.739684	0.739684	0.739684	0.739684	0.739684	0.739684	0.739684	0.739684
5	clusters	0.904234	0.904234	0.904234	0.904234	0.904234	0.904234	0.904234	0.904234	0.904234	0.904234	0.904234	0.904234	0.904234	0.904234	0.904234	0.904234	0.904234	0.904234	0.904234	0.904234	0.904234	0.904234	0.904234	0.904234	0.904234	0.904234	0.904234	0.904234	0.904234	0.904234	0.904234	0.904234	0.904234	0.904234	0.904234	0.904234	0.904234	0.904234	0.904234	0.904234	0.904234	0.904234	0.904234	0.904234	0.904234	0.904234	0.904234	0.904234
6	fret	0.962138	0.908437	0.836126	0.703262	0.733354	0.860492	0.998915	0.903091	0.890281	0.792925	0.780336	0.918069	0.817123	0.838241	0.864739	0.715696	0.773005	0.961059	0.913786	0.922355	0.819232	0.787676	0.848827	0.910576	0.733354	0.739598
6	states	0.843534	0.843534	0.843534	0.843534	0.843534	0.843534	0.843534	0.843534	0.843534	0.843534	0.843534	0.843534	0.843534	0.843534	0.843534	0.843534	0.843534	0.843534	0.843534	0.843534	0.843534	0.843534	0.843534	0.843534	0.843534	0.843534
6	clusters	0.904234	0.904234	0.904234	0.904234	0.904234	0.904234	0.904234	0.904234	0.904234	0.904234	0.904234	0.904234	0.904234	0.904234	0.904234	0.904234	0.904234	0.904234	0.904234	0.904234	0.904234	0.904234	0.904234	0.904234	0.904234	0.904234
7	fret	0.959039	0.977022	0.946051	0.926069	0.964035	0.925069	0.950048	0.928067	0.957041	0.94705	0.95804	0.91208	0.956042	0.953045	0.967032	0.67222	0.616237	0.670221	0.597241	0.637231	0.60224	0.586243	0.559247	0.649228	0.623235	0.609238	0.559247	0.48425	0.855124	0.921073	0.966033	0.619236	0.646229	0.929066	0.975024	0.81615	0.597241	0.607239	0.597241	0.50325	0.554247	0.563246	0.926069	0.942055	0.950048	0.959039	0.96903	0.962037
7	states	0.950048	0.950048	0.950048	0.950048	0.950048	0.950048	0.950048	0.950048	0.950048	0.950048	0.950048	0.950048	0.950048	0.950048	0.950048	0.950048	0.950048	0.950048	0.950048	0.950048	0.950048	0.586243	0.950048	0.950048	0.950048	0.950048	0.950048	0.950048	0.950048	0.950048	0.950048	0.950048	0.950048	0.950048	0.950048	0.950048	0.950048	0.950048	0.950048	0.950048	0.950048	0.950048	0.950048	0.950048	0.950048	0.950048	0.950048	0.950048
7	clusters	0.904234	0.904234	0.904234	0.904234	0.904234	0.904234	0.904234	0.904234	0.904234	0.904234	0.904234	0.904234	0.904234	0.904234	0.904234	0.904234	0.904234	0.904234	0.904234	0.904234	0.904234	0.530403	0.904234	0.904234	0.904234	0.904234	0.904234	0.904234	0.904234	0.904234	0.904234	0.904234	0.904234	0.904234	0.904234	0.904234	0.904234	0.904234	0.904234	0.904234	0.904234	0.904234	0.904234	0.904234	0.904234	0.904234	0.904234	0.904234
8	fret	0.91021	1.01139	0.930506	1.00569	1.0592	1.00569	0.88221	0.921004	0.985869	0.599605	0.973252	0.728509	0.922358	1.17929	0.952432	0.902162	0.80603	0.779764	1.0504	0.984463	0.884857	1.00138	0.921004	0.841736	0.934595	0.962116	0.895484	0.966283	0.978848	0.888834	0.907523	1.00284	0.85989	0.915598	0.908866	0.584238	0.896818	1.02286	0.919651	0.894152	0.974649	0.953812	0.591902	0.564712	0.624077	0.575528	0.785979	0.911556
8	states	0.919651	0.919651	0.919651	0.919651	0.919651	0.919651	0.919651	0.919651	0.919651	0.530625	0.919651	0.732115	0.919651	0.919651	0.919651	0.919651	0.919651	0.919651	0.919651	0.919651	0.919651	0.919651	0.919651	0.919651	0.919651	0.919651	0.919651	0.919651	0.919651	0.919651	0.919651	0.919651	0.919651	0.919651	0.919651	0.530625	0.919651	0.919651	0.919651	0.919651	0.919651	0.919651	0.530625	0.530625	0.530625	0.530625	0.732115	0.919651
8	clusters	0.904234	0.904234	0.904234	0.904234	0.904234	0.904234	0.904234	0.904234	0.904234	0.530403	0.904234	0.904234	0.904234	0.904234	0.904234	0.904234	0.904234	0.904234	0.904234	0.904234	0.904234	0.904234	0.904234	0.904234	0.904234	0.904234	0.904234	0.904234	0.904234	0.904234	0.904234	0.904234	0.904234	0.904234	0.904234	0.530403	0.904234	0.904234	0.904234	0.904234	0.904234	0.904234	0.530403	0.530403	0.530403	0.530403	0.904234	0.904234
9	fret	0.890227	0.884789	0.733769	0.916035	0.995928	0.946424	0.870442	0.952232	0.906736	0.838963	0.903042	0.777537	0.893871	0.881181	0.940652	0.709733	0.884789	0.856317	0.86512	0.712701	0.847598	0.874008	0.795357	0.832114	0.897528	0.897528	0.793722	0.868665	0.837246	0.842407	0.827011	0.854566	0.877588	0.888411	0.874008	0.9012	0.752254	0.764803	0.723169	0.806888	0.882984	0.893871	0.892047	0.942572	0.741422	0.793722	0.912304	0.86689
9	states	0.86512	0.86512	0.86512	0.86512	0.86512	0.86512	0.86512	0.86512	0.86512	0.86512	0.86512	0.86512	0.86512	0.86512	0.86512	0.86512	0.86512	0.86512	0.86512	0.86512	0.86512	0.86512	0.86512	0.86512	0.86512	0.86512	0.86512	0.86512	0.86512	0.86512	0.86512	0.86512	0.86512	0.86512	0.86512	0.86512	0.86512	0.86512	0.86512	0.86512	0.86512	0.86512	0.86512	0.86512	0.86512	0.86512	0.86512	0.86512
9	clusters	0.904234	0.904234	0.904234	0.904234	0.904234	0.904234	0.904234	0.904234	0.904234	0.904234	0.904234	0.904234	0.904234	0.904234	0.904234	0.904234	0.904234	0.904234	0.904234	0.904234	0.904234	0.904234	0.904234	0.904234	0.904234	0.904234	0.904234	0.904234	0.904234	0.904234	0.904234	0.904234	0.904234	0.904234	0.904234	0.904234	0.904234	0.904234	0.904234	0.904234	0.904234	0.904234	0.904234	0.904234	0.904234	0.904234	0.904234	0.904234
10	fret	1.03821	1.08268	1.03821	0.910072	0.950786	0.857576	1.06976	1.08151	1.27827	0.901084	0.943969	0.913448	0.850927	0.840976	1.05804	0.438908	0.547231	0.779654	0.928112	0.865348	1.21685	0.867571	1.12768	1.02194	0.901084	0.890999	0.919081	1.0874	0.981613	0.980466	0.702285	0.534008	0.503704	0.57689	1.03937	0.951923	0.948512	1.09684	1.01037	0.888761	0.875364	0.939432	0.916827	0.907823	0.945105	0.912322	0.636954	0.672635
10	states	0.9157	0.9157	0.9157	0.9157	0.9157	0.9157	0.9157	0.9157	0.9157	0.9157	0.9157	0.9157	0.9157	0.9157	0.9157	0.572271	0.572271	0.9157	0.9157	0.9157	0.9157	0.9157	0.9157	0.9157	0.9157	0.9157	0.9157	0.9157	0.9157	0.9157	0.572271	0.572271	0.572271	0.572271	0.9157	0.9157	0.9157	0.9157	0.9157	0.9157	0.9157	0.9157	0.9157	0.9157	0.9157	0.9157	0.572271	0.572271
10	clusters	0.904234	0.904234	0.904234	0.904234	0.904234	0.904234	0.904234	0.904234	0.904234	0.904234	0.904234	0.904234	0.904234	0.904234	0.904234	0.530403	0.530403	0.904234	0.904234	0.904234	0.904234	0.904234	0.904234	0.904234	0.904234	0.904234	0.904234	0.904234	0.904234	0.904234	0.530403	0.530403	0.530403	0.530403	0.904234	0.904234	0.904234	0.904234	0.904234	0.904234	0.904234	0.904234	0.904234	0.904234	0.904234	0.904234	0.530403	0.530403
11	fret	1.03383	1.13229	1.10806	0.811607	1.07378	0.984389	1.04202	1.10985	0.927079	1.02562	1.07288	0.961351	0.850363	1.06201	1.22811	1.01648	1.03656	1.06019	1.0174	0.900068	1.11255	0.977027	0.604885	0.949334	1.03018	1.04566	0.960428	0.987147	0.946557	0.990822	0.85413	0.938217	0.947483	0.957656	1.00459	1.03018	1.05929	1.07469	0.70339	0.900068	0.931723	0.988066	0.884173	0.912193	1.04111	1.13138	0.967811	0.996331
11	states	0.95858	0.95858	0.95858	0.95858	0.95858	0.95858	0.95858	0.95858	0.95858	0.95858	0.95858	0.95858	0.95858	0.95858	0.95858	0.95858	0.95858	0.95858	0.95858	0.95858	0.95858	0.95858	0.638236	0.95858	0.95858	0.95858	0.95858	0.95858	0.95858	0.95858	0.95858	0.95858	0.95858	0.95858	0.95858	0.95858	0.95858	0.95858	0.638236	0.95858	0.95858	0.95858	0.95858	0.95858	0.95858	0.95858	0.95858	0.95858
11	clusters	0.904234	0.904234	0.904234	0.904234	0.904234	0.904234	0.904234	0.904234	0.904234	0.904234	0.904234	0.904234	0.904234	0.904234	0.904234	0.904234	0.904234	0.904234	0.904234	0.904234	0.904234	0.904234	0.530403	0.904234	0.904234	0.904234	0.904234	0.904234	0.904234	0.904234	0.904234	0.904234	0.904234	0.904234	0.904234	0.904234	0.904234	0.904234	0.530403	0.904234	0.904234	0.904234	0.904234	0.904234	0.904234	0.904234	0.904234	0.904234
12	fret	0.627596	0.539042	0.923741	0.832517	0.967181	0.936931	1	0.920467	0.994756	0.996501	0.88666	0.464366	0.883493	0.980886	0.970592	0.998249	0.927024	0.692766	0.530067	0.496088	0.535666	0.88666	0.93859	0.975728	0.991273	0.915574	0.946925	0.883493	0.905853	0.870916	0.957008	0.958697	0.894617	0.498242	0.584066	0.955322	0.979164	0.982611	0.861576	0.960389	0.953637	0.795435	0.509093	0.468532	0.512373	0.486454	0.466447	0.594766
12	states	0.537354	0.537354	0.941917	0.941917	0.941917	0.941917	0.941917	0.941917	0.941917	0.941917	0.941917	0.537354	0.941917	0.941917	0.941917	0.941917	0.941917	0.537354	0.537354	0.537354	0.537354	0.941917	0.941917	0.941917	0.941917	0.941917	0.941917	0.941917	0.941917	0.941917	0.941917	0.941917	0.941917	0.537354	0.537354	0.941917	0.941917	0.941917	0.941917	0.941917	0.941917	0.941917	0.537354	0.537354	0.537354	0.537354	0.537354	0.537354
12	clusters	0.530403	0.530403	0.904234	0.904234	0.904234	0.904234	0.904234	0.904234	0.904234	0.904234	0.904234	0.530403	0.904234	0.904234	0.904234	0.904234	0.904234	0.530403	0.530403	0.530403	0.530403	0.904234	0.904234	0.904234	0.904234	0.904234	0.904234	0.904234	0.904234	0.904234	0.904234	0.904234	0.904234	0.530403	0.530403	0.904234	0.904234	0.904234	0.904234	0.904234	0.904234	0.904234	0.530403	0.530403	0.530403	0.530403	0.530403	0.530403
13	fret	0.952381	0.924652	0.942828	0.967645	0.961924	0.965738	0.930396	0.964785	1.00665	0.679276	0.571604	0.850635	0.990495	0.951426	0.95429	0.97622	0.967645	0.934223	0.992397	0.951426	0.84098	0.951426	0.965738	0.967645	0.936136	0.953336	0.893961	0.991446	0.812926	0.966692	0.913155	0.934223	0.968598	0.937092	0.870878	0.926567	0.961924	0.95429	0.658625	0.645818	0.810988	0.92561	0.964785	0.96097	0.977173	0.971457	0.959062	0.901643
13	states	0.958585	0.958585	0.958585	0.958585	0.958585	0.958585	0.958585	0.958585	0.958585	0.658625	0.658625	0.658625	0.958585	0.958585	0.958585	0.958585	0.958585	0.958585	0.958585	0.958585	0.658625	0.958585	0.958585	0.958585	0.958585	0.958585	0.958585	0.958585	0.658625	0.958585	0.958585	0.958585	0.958585	0.958585	0.958585	0.958585	0.958585	0.958585	0.658625	0.658625	0.658625	0.958585	0.958585	0.958585	0.958585	0.958585	0.958585	0.958585
13	clusters	0.904234	0.904234	0.904234	0.904234	0.904234	0.904234	0.904234	0.904234	0.904234	0.530403	0.530403	0.530403	0.904234	0.904234	0.904234	0.904234	0.904234	0.904234	0.904234	0.904234	0.530403	0.904234	0.904234	0.904234	0.904234	0.904234	0.904234	0.904234	0.530403	0.904234	0.904234	0.904234	0.904234	0.904234	0.904234	0.904234	0.904234	0.904234	0.530403	0.530403	0.530403	0.904234	0.904234	0.904234	0.904234	0.904234	0.904234	0.904234
14	fret	0.987692	0.934445	0.978466	0.976416	0.972317	0.994871	0.882362	0.957979	0.93649	0.974367	0.979491	1.02978	0.596839	0.908897	0.990768	0.915025	0.630037	0.951837	0.938536	0.899708	0.954908	0.699634
14	states	0.953372	0.953372	0.953372	0.953372	0.953372	0.953372	0.953372	0.953372	0.953372	0.953372	0.953372	0.953372	0.953372	0.953372	0.953372	0.953372	0.953372	0.953372	0.953372	0.953372	0.953372	0.953372
14	clusters	0.904234	0.904234	0.904234	0.904234	0.904234	0.904234	0.904234	0.904234	0.904234	0.904234	0.904234	0.904234	0.904234	0.904234	0.904234	0.904234	0.904234	0.904234	0.904234	0.904234	0.904234	0.904234
15	fret	0.835577	0.876832	0.954752	0.507554	0.883202	0.993517	0.9698	0.948313	0.574074
15	states	0.883202	0.883202	0.883202	0.883202	0.883202	0.883202	0.883202	0.883202	0.883202
15	clusters	0.904234	0.904234	0.904234	0.904234	0.904234	0.904234	0.904234	0.904234	0.904234
16	fret	0.545362	0.548379	0.548379	0.520243	0.508213	0.540333	0.540333	0.530282	0.548379	0.549385	0.524257	0.572575	0.891399	0.943948	0.933413	0.973515	0.957663	0.940786	0.921839	0.867334	0.606968	0.934466	0.907131	0.957663	0.847504	0.9714	0.906081	0.90818	0.967171	0.799683	0.898737	0.645571	0.611023	0.767605	0.775872	0.784146	0.749034	0.855848	0.841251	0.818364	0.788287	0.8298	0.642517	0.853761	0.901884	0.852718	0.935519	0.895592
16	states	0.545362	0.545362	0.545362	0.545362	0.545362	0.545362	0.545362	0.545362	0.545362	0.545362	0.545362	0.545362	0.939206	0.939206	0.939206	0.939206	0.939206	0.939206	0.939206	0.835526	0.545362	0.939206	0.939206	0.939206	0.939206	0.939206	0.939206	0.939206	0.939206	0.835526	0.835526	0.545362	0.545362	0.835526	0.835526	0.835526	0.835526	0.835526	0.835526	0.835526	0.835526	0.835526	0.545362	0.835526	0.835526	0.835526	0.939206	0.939206
16	clusters	0.530403	0.530403	0.530403	0.530403	0.530403	0.530403	0.530403	0.530403	0.530403	0.530403	0.530403	0.530403	0.904234	0.904234	0.904234	0.904234	0.904234	0.904234	0.904234	0.904234	0.530403	0.904234	0.904234	0.904234	0.904234	0.904234	0.904234	0.904234	0.904234	0.904234	0.904234	0.530403	0.530403	0.904234	0.904234	0.904234	0.904234	0.904234	0.904234	0.904234	0.904234	0.904234	0.530403	0.904234	0.904234	0.904234	0.904234	0.904234
17	fret	0.921028	0.892061	0.874131	0.889662	0.938086	0.93198	0.863437	0.910124	0.874131	0.655857
17	states	0.890861	0.890861	0.890861	0.890861	0.890861	0.890861	0.890861	0.890861	0.890861	0.890861
17	clusters	0.904234	0.904234	0.904234	0.904234	0.904234	0.904234	0.904234	0.904234	0.904234	0.904234
18	fret	0.510794	0.63645	0.549753	0.80404	0.668266	0.781296	0.841574	0.846509	0.871168	0.871168	0.823802	0.471778	0.75655	0.757541	0.581675	0.574696	0.42468	0.743674	0.857362	0.767441	0.831702	0.643413	0.882011	0.71195
18	states	0.574696	0.574696	0.574696	0.823802	0.574696	0.823802	0.823802	0.823802	0.823802	0.823802	0.823802	0.574696	0.823802	0.823802	0.574696	0.574696	0.574696	0.823802	0.823802	0.823802	0.823802	0.574696	0.823802	0.823802
18	clusters	0.530403	0.530403	0.530403	0.904234	0.530403	0.904234	0.904234	0.904234	0.904234	0.904234	0.904234	0.530403	0.904234	0.904234	0.530403	0.530403	0.530403	0.904234	0.904234	0.904234	0.904234	0.530403	0.904234	0.904234
19	fret	0.53193	0.483857	0.520892	0.634898	0.649117	0.574194	0.571169	0.528919	0.633883	0.604498	0.530926	0.587314	0.560083	0.563107	0.568145	0.540971	0.602475	0.502857	0.502857	0.513875	0.498854	0.522898	0.565122	0.535948	0.604498	0.521895	0.576212	0.600452	0.851471	0.993678	0.88162	0.897252	0.853547	0.896209	0.900381	0.68782	0.510869	0.600452	0.548009	0.540971	0.613608	0.524905	0.701097	0.896209	0.755414	0.575203	0.496853	0.60551
19	states	0.587314	0.587314	0.587314	0.587314	0.587314	0.587314	0.587314	0.587314	0.587314	0.587314	0.587314	0.587314	0.587314	0.587314	0.587314	0.587314	0.587314	0.587314	0.587314	0.587314	0.587314	0.587314	0.587314	0.587314	0.587314	0.587314	0.587314	0.587314	0.911864	0.911864	0.911864	0.911864	0.911864	0.911864	0.911864	0.587314	0.587314	0.587314	0.587314	0.587314	0.587314	0.587314	0.587314	0.911864	0.587314	0.587314	0.587314	0.587314
19	clusters	0.530403	0.530403	0.530403	0.530403	0.530403	0.530403	0.530403	0.530403	0.530403	0.530403	0.530403	0.530403	0.530403	0.530403	0.530403	0.530403	0.530403	0.530403	0.530403	0.530403	0.530403	0.530403	0.530403	0.530403	0.530403	0.530403	0.530403	0.530403	0.904234	0.904234	0.904234	0.904234	0.904234	0.904234	0.904234	0.530403	0.530403	0.530403	0.530403	0.530403	0.530403	0.530403	0.530403	0.904234	0.530403	0.530403	0.530403	0.530403
20	fret	0.830124	0.753102	1.02766	0.711536	0.889528	0.855111	0.904566	0.813207	0.902247	0.924346	0.800864	0.974967	0.906886	0.915021	0.817709	1.03128	0.857393	1.01799	0.79527	0.997607	0.783001	0.833519	0.418706	0.874565	0.912695	0.892991	0.793035	0.894147	0.915021	0.455166	0.899931	0.823346	0.519379	0.466099	0.786327	0.738815	0.86883	0.915021	0.883764	0.959573	0.812083	0.794152	0.716972	0.592403	0.889528	0.929019	0.889528	0.91968
20	states	0.869976	0.869976	0.869976	0.663608	0.869976	0.869976	0.869976	0.869976	0.869976	0.869976	0.869976	0.869976	0.869976	0.869976	0.869976	0.869976	0.869976	0.869976	0.869976	0.869976	0.869976	0.869976	0.503699	0.869976	0.869976	0.869976	0.869976	0.869976	0.869976	0.503699	0.869976	0.869976	0.503699	0.503699	0.869976	0.869976	0.869976	0.869976	0.869976	0.869976	0.869976	0.869976	0.663608	0.663608	0.869976	0.869976	0.869976	0.869976
20	clusters	0.904234	0.904234	0.904234	0.530403	0.904234	0.904234	0.904234	0.904234	0.904234	0.904234	0.904234	0.904234	0.904234	0.904234	0.904234	0.904234	0.904234	0.904234	0.904234	0.904234	0.904234	0.904234	0.530403	0.904234	0.904234	0.904234	0.904234	0.904234	0.904234	0.530403	0.904234	0.904234	0.530403	0.530403	0.904234	0.904234	0.904234	0.904234	0.904234	0.904234	0.904234	0.904234	0.530403	0.530403	0.904234	0.904234	0.904234	0.904234
21	fret	0.427915	0.48849	0.409373	0.462848	0.516799	0.92248	0.935597	0.912363	0.929752	0.86842	0.975695	0.912363	0.871213	0.960711	0.96519	0.957734	0.957734	0.81775	0.86842	0.879627	0.656006	0.902318
21	states	0.462848	0.462848	0.462848	0.462848	0.462848	0.912363	0.912363	0.912363	0.912363	0.912363	0.912363	0.912363	0.912363	0.912363	0.912363	0.912363	0.912363	0.912363	0.912363	0.912363	0.912363	0.912363
21	clusters	0.530403	0.530403	0.530403	0.530403	0.530403	0.904234	0.904234	0.904234	0.904234	0.904234	0.904234	0.904234	0.904234	0.904234	0.904234	0.904234	0.904234	0.904234	0.904234	0.904234	0.904234	0.904234
22	fret	0.893341	0.922509	0.929307	0.936101	0.964213	0.937071	0.95937	0.939011	0.961307	0.97099	0.823096	0.856309	0.961307	0.951618	0.964213	0.933189	0.951618	0.983569	0.919595	0.917652	0.945801
22	states	0.932698	0.951618	0.951618	0.951618	0.951618	0.951618	0.951618	0.951618	0.951618	0.951618	0.839703	0.839703	0.932698	0.951618	0.932698	0.951618	0.951618	0.951618	0.932698	0.932698	0.932698
22	clusters	0.904234	0.904234	0.904234	0.904234	0.904234	0.904234	0.904234	0.904234	0.904234	0.904234	0.904234	0.904234	0.904234	0.904234	0.904234	0.904234	0.904234	0.904234	0.904234	0.904234	0.904234
23	fret	0.971366	0.935991	0.801431	0.987875	0.887334	0.351462	0.940365	1.0153	0.968385	0.983354	0.885929	0.97585	0.912885	0.993925	0.789587	0.828126	0.935991	0.852604	0.989385	0.471618	0.917189	0.966896	0.950625	1.00305	1.05111	0.792211	0.632827	0.949154	0.734396	0.840311	1.01223	0.776548	0.748264	0.723128	0.966896	0.687463	0.989385	0.917189	1.01679	0.653931	1.10404	0.910023	0.943289	0.884524	1.00147	0.768785	0.883121	0.786969
23	states	0.934536	0.934536	0.934536	0.934536	0.934536	0.230387	0.934536	0.934536	0.934536	0.934536	0.934536	0.934536	0.934536	0.934536	0.723128	0.934536	0.934536	0.934536	0.934536	0.723128	0.934536	0.934536	0.934536	0.934536	0.934536	0.723128	0.723128	0.934536	0.723128	0.934536	0.934536	0.723128	0.723128	0.723128	0.934536	0.723128	0.934536	0.934536	0.934536	0.723128	0.934536	0.934536	0.934536	0.934536	0.934536	0.723128	0.934536	0.934536
23	clusters	0.904234	0.904234	0.904234	0.904234	0.904234	0.530403	0.904234	0.904234	0.904234	0.904234	0.904234	0.904234	0.904234	0.904234	0.904234	0.904234	0.904234	0.904234	0.904234	0.904234	0.904234	0.904234	0.904234	0.904234	0.904234	0.904234	0.904234	0.904234	0.904234	0.904234	0.904234	0.904234	0.904234	0.904234	0.904234	0.904234	0.904234	0.904234	0.904234	0.904234	0.904234	0.904234	0.904234	0.904234	0.904234	0.904234	0.904234	0.904234
24	fret	0.634771	0.607033	0.479598	0.596798	0.53583	0.593732	0.59271	0.517686	0.55607	0.623452	0.930726	0.9614	0.959203	0.894809	0.952617	0.924177	0.988942	0.904579	0.89264	0.878565	0.976805	0.90784	0.88181	0.918726	0.903493	0.797043	0.862373	0.494597	0.62448	0.571304	0.874242	0.953714	0.963598	0.911103	0.89264	0.900234	0.940565	0.833357	1.00331	0.843011	0.964697	0.89264	0.950424	0.97901	0.902406	0.797043	0.948231	0.935097
24	states	0.590667	0.590667	0.590667	0.590667	0.590667	0.590667	0.590667	0.590667	0.590667	0.590667	0.916002	0.916002	0.916002	0.916002	0.916002	0.916002	0.916002	0.916002	0.916002	0.916002	0.916002	0.916002	0.916002	0.916002	0.916002	0.753615	0.916002	0.590667	0.590667	0.590667	0.916002	0.916002	0.916002	0.916002	0.916002	0.916002	0.916002	0.916002	0.916002	0.916002	0.916002	0.916002	0.916002	0.916002	0.916002	0.916002	0.916002	0.916002
24	clusters	0.530403	0.530403	0.530403	0.530403	0.530403	0.530403	0.530403	0.530403	0.530403	0.530403	0.904234	0.904234	0.904234	0.904234	0.904234	0.904234	0.904234	0.904234	0.904234	0.904234	0.904234	0.904234	0.904234	0.904234	0.904234	0.904234	0.904234	0.530403	0.530403	0.530403	0.904234	0.904234	0.904234	0.904234	0.904234	0.904234	0.904234	0.904234	0.904234	0.904234	0.904234	0.904234	0.904234	0.904234	0.904234	0.904234	0.904234	0.904234
25	fret	0.94801	1.00555	0.890032	0.973384	1.05029	0.952413	0.990002	0.986674	1.01893	0.830581	0.922766	0.971172	0.920576	0.970067	1.05704	1.04917	1.07733	0.932628	0.97449	0.941412	0.910738	0.946909	0.942511	0.919482	0.965647	1.01113	0.966752	0.972278	0.976703	0.984456	0.892207	0.912922	1.01001	0.963439	0.997776	0.97781	0.928242	0.963439	1.00222	0.90419	0.861838	0.932628	1.07958	0.983348	0.895472	0.940313	1.00445	0.962335
25	states	0.961232	0.961232	0.961232	0.961232	0.961232	0.961232	0.961232	0.961232	0.961232	0.961232	0.961232	0.961232	0.961232	0.961232	0.961232	0.961232	0.961232	0.961232	0.961232	0.961232	0.961232	0.961232	0.961232	0.961232	0.961232	0.961232	0.961232	0.961232	0.961232	0.961232	0.961232	0.961232	0.961232	0.961232	0.961232	0.961232	0.961232	0.961232	0.961232	0.961232	0.961232	0.961232	0.961232	0.961232	0.961232	0.961232	0.961232	0.961232
25	clusters	0.904234	0.904234	0.904234	0.904234	0.904234	0.904234	0.904234	0.904234	0.904234	0.904234	0.904234	0.904234	0.904234	0.904234	0.904234	0.904234	0.904234	0.904234	0.904234	0.904234	0.904234	0.904234	0.904234	0.904234	0.904234	0.904234	0.904234	0.904234	0.904234	0.904234	0.904234	0.904234	0.904234	0.904234	0.904234	0.904234	0.904234	0.904234	0.904234	0.904234	0.904234	0.904234	0.904234	0.904234	0.904234	0.904234	0.904234	0.904234
26	fret	0.556064	0.911324	0.9781	0.903476	0.933751	0.773939	0.864747	0.7451	0.969955	0.956461	0.848225	0.514115	0.881426	0.916576	0.911324	0.566725	0.813162	0.900868	0.869862	0.910014	0.803272	0.891768	0.855831	0.691161	0.903476	0.951092	0.696941	0.47224	0.417777	0.557127	0.752264	0.868582	0.67737	0.490471	0.496617	0.763041	0.777579	0.891768	0.953775	0.872425	0.811922	0.459194	0.656896	0.853292	0.863471	0.846961	0.932424	0.913948
26	states	0.566725	0.879494	0.879494	0.879494	0.879494	0.879494	0.879494	0.879494	0.879494	0.879494	0.879494	0.566725	0.879494	0.879494	0.879494	0.566725	0.879494	0.879494	0.879494	0.879494	0.879494	0.879494	0.879494	0.566725	0.879494	0.879494	0.566725	0.566725	0.566725	0.566725	0.566725	0.879494	0.566725	0.566725	0.566725	0.879494	0.879494	0.879494	0.879494	0.879494	0.879494	0.566725	0.566725	0.879494	0.879494	0.879494	0.879494	0.879494
26	clusters	0.530403	0.904234	0.904234	0.904234	0.904234	0.904234	0.904234	0.904234	0.904234	0.904234	0.904234	0.530403	0.904234	0.904234	0.904234	0.530403	0.904234	0.904234	0.904234	0.904234	0.904234	0.904234	0.904234	0.530403	0.904234	0.904234	0.530403	0.530403	0.530403	0.530403	0.530403	0.904234	0.530403	0.530403	0.530403	0.904234	0.904234	0.904234	0.904234	0.904234	0.904234	0.530403	0.530403	0.904234	0.904234	0.904234	0.904234	0.904234
27	fret	0.380801	0.48357	0.394504	0.474584	0.456666	0.496581	0.853827	0.871176	0.858159	0.840857	0.847338	0.894044	0.862494	0.848419	0.835463	0.899505	0.945625	0.962205	0.95225	1.00557	0.985514	0.933503	0.983289	0.997769	0.96442	0.982177	0.972181	1.00557	0.997769	0.97551	1	0.985514	1.0011	0.971071	0.958884	0.951145	0.988853	0.995538	0.643228	0.78506	0.958884	0.976621	0.972181	0.953355	0.981065	0.984401	0.958884	0.589731
27	states	0.510641	0.510641	0.510641	0.510641	0.510641	0.510641	0.96442	0.96442	0.96442	0.96442	0.96442	0.96442	0.96442	0.96442	0.96442	0.96442	0.96442	0.96442	0.96442	0.96442	0.96442	0.96442	0.96442	0.96442	0.96442	0.96442	0.96442	0.96442	0.96442	0.96442	0.96442	0.96442	0.96442	0.96442	0.96442	0.96442	0.96442	0.96442	0.510641	0.96442	0.96442	0.96442	0.96442	0.96442	0.96442	0.96442	0.96442	0.510641
27	clusters	0.530403	0.530403	0.530403	0.530403	0.530403	0.530403	0.904234	0.904234	0.904234	0.904234	0.904234	0.904234	0.904234	0.904234	0.904234	0.904234	0.904234	0.904234	0.904234	0.904234	0.904234	0.904234	0.904234	0.904234	0.904234	0.904234	0.904234	0.904234	0.904234	0.904234	0.904234	0.904234	0.904234	0.904234	0.904234	0.904234	0.904234	0.904234	0.530403	0.904234	0.904234	0.904234	0.904234	0.904234	0.904234	0.904234	0.904234	0.530403
28	fret	0.978725	1.03344	0.934917	0.896966	1.02643	0.932218	1.02467	0.980502	1.03782	1.01236	1.01588	1.0518	0.979614	0.979614	0.977836	1.00972	0.717648	0.516815	0.728084	0.996462	0.932218	1.03432	0.960011	0.933118	0.982279	1.03957	1.02379	0.965367	0.983167	0.900596	0.653424	0.519812	0.497777	0.470568	0.577338	0.587174	0.503798	0.652458	0.951963	1.00707	0.898781	0.518813	0.524804	0.922308	0.979614	1.04132	0.637934	0.814366
28	states	0.979614	0.979614	0.979614	0.979614	0.979614	0.979614	0.979614	0.979614	0.979614	0.979614	0.979614	0.979614	0.979614	0.979614	0.979614	0.979614	0.551071	0.551071	0.551071	0.979614	0.979614	0.979614	0.979614	0.979614	0.979614	0.979614	0.979614	0.979614	0.979614	0.979614	0.551071	0.551071	0.551071	0.551071	0.551071	0.551071	0.551071	0.551071	0.979614	0.979614	0.979614	0.551071	0.551071	0.979614	0.979614	0.979614	0.551071	0.979614
28	clusters	0.904234	0.904234	0.904234	0.904234	0.904234	0.904234	0.904234	0.904234	0.904234	0.904234	0.904234	0.904234	0.904234	0.904234	0.904234	0.904234	0.530403	0.530403	0.530403	0.904234	0.904234	0.904234	0.904234	0.904234	0.904234	0.904234	0.904234	0.904234	0.904234	0.904234	0.530403	0.530403	0.530403	0.530403	0.530403	0.530403	0.530403	0.530403	0.904234	0.904234	0.904234	0.530403	0.530403	0.904234	0.904234	0.904234	0.530403	0.904234
29	fret	0.927733	1	0.926729	0.930743	0.967876	0.923719	0.890612	1.01305	0.959846	0.963861	0.928736	0.981929	0.962857	0.952821	0.840465	0.93576	0.980925	0.90265	0.944792	0.940778	0.975906	0.951817	0.862527	0.96085	0.971891	0.982933	0.933753	0.941782	0.94981	0.934757	0.945796	0.944792	0.971891	0.958843
29	states	0.955832	0.955832	0.955832	0.955832	0.955832	0.955832	0.896631	0.955832	0.955832	0.955832	0.896631	0.955832	0.955832	0.955832	0.896631	0.896631	0.955832	0.896631	0.955832	0.955832	0.955832	0.955832	0.896631	0.955832	0.955832	0.955832	0.955832	0.955832	0.955832	0.955832	0.955832	0.955832	0.955832	0.955832
29	clusters	0.904234	0.904234	0.904234	0.904234	0.904234	0.904234	0.904234	0.904234	0.904234	0.904234	0.904234	0.904234	0.904234	0.904234	0.904234	0.904234	0.904234	0.904234	0.904234	0.904234	0.904234	0.904234	0.904234	0.904234	0.904234	0.904234	0.904234	0.904234	0.904234	0.904234	0.904234	0.904234	0.904234	0.904234
30	fret	0.906967	0.948506	0.953394	0.976472	0.866852	0.940403	0.981475	0.971489	0.96323	0.974808	1.02565	0.921181	0.903832	0.96323	0.935568	0.93879	0.922771	0.981475	0.880581	0.918007	0.958302	1.03609	0.959942	1.0034	0.956663	0.996611	0.930753	0.996611	0.968178	0.927554	0.986499	0.974808	0.955027	0.925957	0.953394	0.552594	0.557127	0.601242	0.943638	0.948506	0.942019	0.627688	0.571969	0.940403	0.964877	0.851786	0.780728	0.981475
30	states	0.949319	0.949319	0.949319	0.949319	0.949319	0.949319	0.949319	0.949319	0.949319	0.949319	0.949319	0.949319	0.949319	0.949319	0.949319	0.949319	0.949319	0.949319	0.949319	0.949319	0.949319	0.949319	0.949319	0.949319	0.949319	0.949319	0.949319	0.949319	0.949319	0.949319	0.949319	0.949319	0.949319	0.949319	0.949319	0.558833	0.558833	0.558833	0.949319	0.949319	0.949319	0.558833	0.558833	0.949319	0.949319	0.949319	0.558833	0.949319
30	clusters	0.904234	0.904234	0.904234	0.904234	0.904234	0.904234	0.904234	0.904234	0.904234	0.904234	0.904234	0.904234	0.904234	0.904234	0.904234	0.904234	0.904234	0.904234	0.904234	0.904234	0.904234	0.904234	0.904234	0.904234	0.904234	0.904234	0.904234	0.904234	0.904234	0.904234	0.904234	0.904234	0.904234	0.904234	0.904234	0.530403	0.530403	0.530403	0.904234	0.904234	0.904234	0.530403	0.530403	0.904234	0.904234	0.904234	0.530403	0.904234
31	fret	0.93983	0.773065	0.719034	0.760274	0.748923	0.691617	0.72744	0.741547	0.736594	0.757854	0.795032	0.667745	0.69939	0.739899	0.793485	0.980678	0.98677	0.972683	1.02288	1.00947	1.01182	1.04282	0.986163	1.00947	0.991609	1.01475	0.957697	0.970826	1.00947	0.995217	0.965227	0.948816	0.978227	0.947538	0.928776	0.923518	0.714801	0.786448	0.691617	0.719034	0.704557
31	states	0.983421	0.736594	0.736594	0.736594	0.736594	0.736594	0.736594	0.736594	0.736594	0.736594	0.736594	0.736594	0.736594	0.736594	0.736594	0.983421	0.983421	0.983421	0.983421	0.983421	0.983421	0.983421	0.983421	0.983421	0.983421	0.983421	0.983421	0.983421	0.983421	0.983421	0.983421	0.983421	0.983421	0.983421	0.983421	0.983421	0.736594	0.736594	0.736594	0.736594	0.736594
31	clusters	0.904234	0.904234	0.904234	0.904234	0.904234	0.904234	0.904234	0.904234	0.904234	0.904234	0.904234	0.904234	0.904234	0.904234	0.904234	0.904234	0.904234	0.904234	0.904234	0.904234	0.904234	0.904234	0.904234	0.904234	0.904234	0.904234	0.904234	0.904234	0.904234	0.904234	0.904234	0.904234	0.904234	0.904234	0.904234	0.904234	0.904234	0.904234	0.904234	0.904234	0.904234
32	fret	0.555217	0.554201	0.551156	0.5766	0.525856	0.839296	0.783387	0.91895	0.815558	0.882771	0.966521	0.666286	0.562333	0.877314	1.01121	0.768451	0.838214	1.03824	1.04615	1.09047	0.944334	0.895894	0.937699	1.0802	0.938804	0.909055	1.01571	0.843625	0.494684	0.612468	0.526865	0.533936	0.532925	0.929969	0.935489	0.967633	0.967633	0.980999	0.988813	0.901373	0.927763	1.05067	0.869685	0.948763	0.726044	0.585796	0.599112	0.563351
32	states	0.555217	0.555217	0.555217	0.555217	0.555217	0.948763	0.948763	0.948763	0.948763	0.948763	0.948763	0.555217	0.555217	0.948763	0.948763	0.948763	0.948763	0.948763	0.948763	0.948763	0.948763	0.948763	0.948763	0.948763	0.948763	0.948763	0.948763	0.948763	0.555217	0.555217	0.555217	0.555217	0.555217	0.948763	0.948763	0.948763	0.948763	0.948763	0.948763	0.948763	0.948763	0.948763	0.948763	0.948763	0.555217	0.555217	0.555217	0.555217
32	clusters	0.530403	0.530403	0.530403	0.530403	0.530403	0.904234	0.904234	0.904234	0.904234	0.904234	0.904234	0.530403	0.530403	0.904234	0.904234	0.904234	0.904234	0.904234	0.904234	0.904234	0.904234	0.904234	0.904234	0.904234	0.904234	0.904234	0.904234	0.904234	0.530403	0.530403	0.530403	0.530403	0.530403	0.904234	0.904234	0.904234	0.904234	0.904234	0.904234	0.904234	0.904234	0.904234	0.904234	0.904234	0.530403	0.530403	0.530403	0.530403
[truncated: 594 more columns]

## Sheet: 242-400_intra_liposome
1	fret	0.560492	0.60372	0.846066	0.586617	0.628903	0.554471	0.695574	0.564508	0.719885	0.643023	0.642014	0.889024	0.604726	0.716844	0.615803	0.641005	0.64605	0.710764	0.715831	0.623864	0.652107	0.883904	0.61681	0.663215	0.591645	0.529402	0.564508	0.525394	0.615803	0.559488	0.63092	0.659175	0.611774	0.57958	0.631928	0.619833	0.617818	0.653116	0.571541	0.698611	0.485371	0.617818	0.525394	0.553468	0.653116	0.786926	0.536417	0.605733
1	states	0.601204	0.601204	0.773699	0.601204	0.601204	0.601204	0.601204	0.601204	0.601204	0.601204	0.601204	0.773699	0.601204	0.601204	0.601204	0.601204	0.601204	0.601204	0.773699	0.601204	0.601204	0.773699	0.601204	0.601204	0.601204	0.601204	0.601204	0.601204	0.601204	0.601204	0.601204	0.601204	0.601204	0.601204	0.601204	0.601204	0.601204	0.601204	0.601204	0.601204	0.601204	0.601204	0.601204	0.601204	0.601204	0.773699	0.601204	0.601204
1	clusters	0.601292	0.601292	0.869597	0.601292	0.601292	0.601292	0.601292	0.601292	0.601292	0.601292	0.601292	0.869597	0.601292	0.601292	0.601292	0.601292	0.601292	0.601292	0.869597	0.601292	0.601292	0.869597	0.601292	0.601292	0.601292	0.601292	0.601292	0.601292	0.601292	0.601292	0.601292	0.601292	0.601292	0.601292	0.601292	0.601292	0.601292	0.601292	0.601292	0.601292	0.601292	0.601292	0.601292	0.601292	0.601292	0.869597	0.601292	0.601292
2	fret	0.560953	0.596222	0.546881	0.544872	0.505763	0.542863	0.484761	0.613391	0.552908	0.568	0.510769	0.574042	0.463799	0.473776	0.41107	0.478768	0.464797	0.540854	0.513774	0.503761	0.582102	0.52881	0.493757	0.547886	0.558942	0.519786	0.491757	0.537842	0.467789	0.534831	0.589159	0.575049	0.562968	0.538846	0.543867	0.510769	0.526804	0.515778	0.529814	0.489758	0.580086	0.568	0.589159	0.53985	0.509768	0.517782	0.504762	0.488759
2	states	0.53734	0.53734	0.53734	0.53734	0.53734	0.53734	0.53734	0.53734	0.53734	0.53734	0.53734	0.53734	0.53734	0.53734	0.53734	0.53734	0.53734	0.53734	0.53734	0.53734	0.53734	0.53734	0.53734	0.53734	0.53734	0.53734	0.53734	0.53734	0.53734	0.53734	0.53734	0.53734	0.53734	0.53734	0.53734	0.53734	0.53734	0.53734	0.53734	0.53734	0.53734	0.53734	0.53734	0.53734	0.53734	0.53734	0.53734	0.53734
2	clusters	0.601292	0.601292	0.601292	0.601292	0.601292	0.601292	0.601292	0.601292	0.601292	0.601292	0.601292	0.601292	0.601292	0.601292	0.601292	0.601292	0.601292	0.601292	0.601292	0.601292	0.601292	0.601292	0.601292	0.601292	0.601292	0.601292	0.601292	0.601292	0.601292	0.601292	0.601292	0.601292	0.601292	0.601292	0.601292	0.601292	0.601292	0.601292	0.601292	0.601292	0.601292	0.601292	0.601292	0.601292	0.601292	0.601292	0.601292	0.601292
3	fret	0.695717	0.575705	0.688881	0.698645	0.799459	0.637911	0.647739	0.706451	0.821576	0.674212	0.712293	0.615258	0.669317	0.642826	0.701576	0.694741	0.646756	0.6261	0.664418	0.677148	0.749217	0.636927	0.647739	0.690835	0.808121	0.962387	0.950122	0.583636	0.525979	0.657554	0.642826	0.67617	0.67617	0.632992	0.67617	0.683017	0.665398	0.656573	0.690835	0.651666	0.722027	0.694741
3	states	0.669317	0.669317	0.669317	0.669317	0.821576	0.669317	0.669317	0.669317	0.821576	0.669317	0.669317	0.669317	0.669317	0.669317	0.669317	0.669317	0.669317	0.669317	0.669317	0.669317	0.669317	0.669317	0.669317	0.669317	0.821576	0.821576	0.821576	0.669317	0.669317	0.669317	0.669317	0.669317	0.669317	0.669317	0.669317	0.669317	0.669317	0.669317	0.669317	0.669317	0.669317	0.669317
3	clusters	0.601292	0.601292	0.601292	0.601292	0.869597	0.601292	0.601292	0.601292	0.869597	0.601292	0.601292	0.601292	0.601292	0.601292	0.601292	0.601292	0.601292	0.601292	0.601292	0.601292	0.601292	0.601292	0.601292	0.601292	0.869597	0.869597	0.869597	0.601292	0.601292	0.601292	0.601292	0.601292	0.601292	0.601292	0.601292	0.601292	0.601292	0.601292	0.601292	0.601292	0.601292	0.601292
4	fret	0.63318	0.711472	0.767745	0.653461	0.660568	0.760567	0.72679	0.6921	0.747248	0.728834	0.634193	0.658537	0.663616	0.687005	0.698214	0.688023	0.725768	0.691082	0.646358	0.659553	0.654476	0.700252	0.72066	0.706371	0.729856	0.701272	0.67378	0.665648	0.708411	0.634193	0.761592	0.698214	0.653461	0.672763	0.701272	0.694138	0.638247	0.691082	0.738037	0.642302	0.648387	0.693119	0.704331	0.656506	0.647373	0.848057	0.976968	0.937301
4	states	0.655491	0.655491	0.655491	0.655491	0.655491	0.655491	0.655491	0.655491	0.655491	0.655491	0.655491	0.655491	0.655491	0.655491	0.655491	0.655491	0.655491	0.655491	0.655491	0.655491	0.655491	0.655491	0.655491	0.655491	0.655491	0.655491	0.655491	0.655491	0.655491	0.655491	0.655491	0.655491	0.655491	0.655491	0.655491	0.655491	0.655491	0.655491	0.655491	0.655491	0.655491	0.655491	0.655491	0.655491	0.655491	0.938343	0.938343	0.938343
4	clusters	0.601292	0.601292	0.601292	0.601292	0.601292	0.601292	0.601292	0.601292	0.601292	0.601292	0.601292	0.601292	0.601292	0.601292	0.601292	0.601292	0.601292	0.601292	0.601292	0.601292	0.601292	0.601292	0.601292	0.601292	0.601292	0.601292	0.601292	0.601292	0.601292	0.601292	0.601292	0.601292	0.601292	0.601292	0.601292	0.601292	0.601292	0.601292	0.601292	0.601292	0.601292	0.601292	0.601292	0.601292	0.601292	0.869597	0.869597	0.869597
5	fret	0.757009	0.570806	0.429791	0.54308	0.455472	0.437669	0.506511	0.534914	0.619695	0.486389	0.489399	0.526762	0.582177	0.465409	0.490403	0.507521	0.502475	0.683287	0.448535	0.530831	0.541036	0.544102	0.718841	0.929625	0.876715	0.556397	0.562564	0.852854	0.57287	0.501468	0.575969	0.534914	0.513586	0.535934	0.594631	0.554344	0.536953	0.48038	0.541036	0.514598	0.771307	0.955248	0.913428	0.485387	0.487392	0.530831	0.468397	0.565652
5	states	0.864784	0.534914	0.534914	0.534914	0.534914	0.534914	0.534914	0.534914	0.534914	0.534914	0.534914	0.534914	0.534914	0.534914	0.534914	0.534914	0.534914	0.864784	0.534914	0.534914	0.534914	0.534914	0.864784	0.864784	0.864784	0.534914	0.534914	0.864784	0.534914	0.534914	0.534914	0.534914	0.534914	0.534914	0.534914	0.534914	0.534914	0.534914	0.534914	0.534914	0.864784	0.864784	0.864784	0.534914	0.534914	0.534914	0.534914	0.534914
5	clusters	0.869597	0.601292	0.601292	0.601292	0.601292	0.601292	0.601292	0.601292	0.601292	0.601292	0.601292	0.601292	0.601292	0.601292	0.601292	0.601292	0.601292	0.869597	0.601292	0.601292	0.601292	0.601292	0.869597	0.869597	0.869597	0.601292	0.601292	0.869597	0.601292	0.601292	0.601292	0.601292	0.601292	0.601292	0.601292	0.601292	0.601292	0.601292	0.601292	0.601292	0.869597	0.869597	0.869597	0.601292	0.601292	0.601292	0.601292	0.601292
6	fret	0.603535	0.591701	0.493197	0.455998	0.407421	0.625182	0.596632	0.538155	0.544126	0.538155	0.619285	0.594658	0.39929	0.609445	0.47211	0.465066	0.782374	0.523204	0.42973	0.573898	0.444897	0.529188	0.543131	0.580826	0.367686	0.431755	0.478142	0.623217	0.655561	0.549098	0.488183	0.567955	0.545121	0.737165	0.567955	0.401324	0.554065	0.686771	0.498208	0.320507	0.464059	0.648714	0.467079	0.603535	0.562998
6	states	0.544126	0.544126	0.544126	0.544126	0.544126	0.544126	0.544126	0.544126	0.544126	0.544126	0.544126	0.544126	0.544126	0.544126	0.544126	0.544126	0.544126	0.544126	0.544126	0.544126	0.544126	0.544126	0.544126	0.544126	0.544126	0.544126	0.544126	0.544126	0.544126	0.544126	0.544126	0.544126	0.544126	0.544126	0.544126	0.544126	0.544126	0.544126	0.544126	0.544126	0.544126	0.544126	0.544126	0.544126	0.544126
6	clusters	0.601292	0.601292	0.601292	0.601292	0.601292	0.601292	0.601292	0.601292	0.601292	0.601292	0.601292	0.601292	0.601292	0.601292	0.601292	0.601292	0.601292	0.601292	0.601292	0.601292	0.601292	0.601292	0.601292	0.601292	0.601292	0.601292	0.601292	0.601292	0.601292	0.601292	0.601292	0.601292	0.601292	0.601292	0.601292	0.601292	0.601292	0.601292	0.601292	0.601292	0.601292	0.601292	0.601292	0.601292	0.601292
7	fret	0.631013	0.725926	0.720688	0.76624	0.962715	0.81824	0.749229	0.732875	0.689696	0.680701	0.661604	0.638495	0.667089	0.716307	0.647788	0.712791	0.656119	0.718061	0.683406	0.720688	0.691487	0.654277	0.732009	0.691487	0.715428	0.659794	0.602568	0.586173	0.629136	0.652433	0.661604	0.671642	0.861908	0.688799	0.67799	0.633824	0.683406	0.672551	0.654277	0.655198	0.695955	0.664349	0.699518	0.722436	0.605441	0.688799	0.692382	0.891172
7	states	0.673459	0.673459	0.673459	0.809307	0.809307	0.809307	0.809307	0.673459	0.673459	0.673459	0.673459	0.673459	0.673459	0.673459	0.673459	0.673459	0.673459	0.673459	0.673459	0.673459	0.673459	0.673459	0.673459	0.673459	0.673459	0.673459	0.673459	0.673459	0.673459	0.673459	0.673459	0.673459	0.809307	0.673459	0.673459	0.673459	0.673459	0.673459	0.673459	0.673459	0.673459	0.673459	0.673459	0.673459	0.673459	0.673459	0.673459	0.809307
7	clusters	0.601292	0.601292	0.601292	0.869597	0.869597	0.869597	0.869597	0.601292	0.601292	0.601292	0.601292	0.601292	0.601292	0.601292	0.601292	0.601292	0.601292	0.601292	0.601292	0.601292	0.601292	0.601292	0.601292	0.601292	0.601292	0.601292	0.601292	0.601292	0.601292	0.601292	0.601292	0.601292	0.869597	0.601292	0.601292	0.601292	0.601292	0.601292	0.601292	0.601292	0.601292	0.601292	0.601292	0.601292	0.601292	0.601292	0.601292	0.869597
8	fret	0.715465	0.729766	0.734561	0.530106	0.646991	0.641324	0.635678	0.660676	0.601132	0.540653	0.676796	0.554477	0.533262	0.680272	0.659531	0.628931	0.563048	0.659531	0.589059	0.637934	0.630053	0.574914	0.628931	0.581426	0.466342	0.566275	0.632301	0.92416	0.764866	0.561974	0.616614	0.626688	0.658387	0.684919	0.654959	0.55021	0.626688	0.602234	0.554477	0.60003	0.677954	0.714279	0.628931	0.664116	0.71191	0.573832	0.68958	0.590152
8	states	0.623331	0.623331	0.623331	0.623331	0.623331	0.623331	0.623331	0.623331	0.623331	0.623331	0.623331	0.623331	0.623331	0.623331	0.623331	0.623331	0.623331	0.623331	0.623331	0.623331	0.623331	0.623331	0.623331	0.623331	0.623331	0.623331	0.623331	0.985958	0.623331	0.623331	0.623331	0.623331	0.623331	0.623331	0.623331	0.623331	0.623331	0.623331	0.623331	0.623331	0.623331	0.623331	0.623331	0.623331	0.623331	0.623331	0.623331	0.623331
8	clusters	0.601292	0.601292	0.601292	0.601292	0.601292	0.601292	0.601292	0.601292	0.601292	0.601292	0.601292	0.601292	0.601292	0.601292	0.601292	0.601292	0.601292	0.601292	0.601292	0.601292	0.601292	0.601292	0.601292	0.601292	0.601292	0.601292	0.601292	0.869597	0.601292	0.601292	0.601292	0.601292	0.601292	0.601292	0.601292	0.601292	0.601292	0.601292	0.601292	0.601292	0.601292	0.601292	0.601292	0.601292	0.601292	0.601292	0.601292	0.601292
9	fret	0.446482	0.714992	0.559892	0.525416	0.583247	0.389048	0.49768	0.435629	0.457403	0.446482	0.469394	0.489562	0.530598	0.433663	0.443516	0.391922	0.446482	0.442528	0.451438	0.532675	0.420938	0.423866	0.433663	0.35398	0.381404	0.483487	0.877733	0.971015	0.914268	0.963181	0.923189	0.521282	0.430718	0.505863	0.484498	0.50484	0.444504	0.582179	0.429738	0.373795	0.454418	0.460393	0.469394	0.480458	0.435629	0.680888	0.474414	0.524382
9	states	0.476931	0.862811	0.476931	0.476931	0.476931	0.476931	0.476931	0.476931	0.476931	0.476931	0.476931	0.476931	0.476931	0.476931	0.476931	0.476931	0.476931	0.476931	0.476931	0.476931	0.476931	0.476931	0.476931	0.476931	0.476931	0.476931	0.862811	0.862811	0.862811	0.862811	0.862811	0.476931	0.476931	0.476931	0.476931	0.476931	0.476931	0.476931	0.476931	0.476931	0.476931	0.476931	0.476931	0.476931	0.476931	0.862811	0.476931	0.476931
9	clusters	0.601292	0.869597	0.601292	0.601292	0.601292	0.601292	0.601292	0.601292	0.601292	0.601292	0.601292	0.601292	0.601292	0.601292	0.601292	0.601292	0.601292	0.601292	0.601292	0.601292	0.601292	0.601292	0.601292	0.601292	0.601292	0.601292	0.869597	0.869597	0.869597	0.869597	0.869597	0.601292	0.601292	0.601292	0.601292	0.601292	0.601292	0.601292	0.601292	0.601292	0.601292	0.601292	0.601292	0.601292	0.601292	0.869597	0.601292	0.601292
10	fret	0.692083	0.648915	0.649846	0.70021	0.563668	0.649846	0.68209	0.704706	0.65635	0.691177	0.624496	0.608316	0.680266	0.602565	0.685732	0.648002	0.692988	0.619755	0.67844	0.630166	0.654495	0.645203	0.679353	0.627333	0.622601	0.653566	0.684822	0.706501	0.889971	0.777411	0.661903	0.698408	0.748061	0.651707	0.652637	0.796936	0.710978	0.692083	0.677526	0.591965	0.710978	0.710978	0.67203	0.673864	0.614046	0.672948	0.689364	0.621653
10	states	0.66421	0.66421	0.66421	0.66421	0.66421	0.66421	0.66421	0.66421	0.66421	0.66421	0.66421	0.66421	0.66421	0.66421	0.66421	0.66421	0.66421	0.66421	0.66421	0.66421	0.66421	0.66421	0.66421	0.66421	0.66421	0.66421	0.66421	0.66421	0.830276	0.830276	0.66421	0.66421	0.66421	0.66421	0.66421	0.830276	0.66421	0.66421	0.66421	0.66421	0.66421	0.66421	0.66421	0.66421	0.66421	0.66421	0.66421	0.66421
10	clusters	0.601292	0.601292	0.601292	0.601292	0.601292	0.601292	0.601292	0.601292	0.601292	0.601292	0.601292	0.601292	0.601292	0.601292	0.601292	0.601292	0.601292	0.601292	0.601292	0.601292	0.601292	0.601292	0.601292	0.601292	0.601292	0.601292	0.601292	0.601292	0.869597	0.869597	0.601292	0.601292	0.601292	0.601292	0.601292	0.869597	0.601292	0.601292	0.601292	0.601292	0.601292	0.601292	0.601292	0.601292	0.601292	0.601292	0.601292	0.601292
11	fret	0.534936	0.632792	0.635677	0.720878	0.668167	0.668167	0.628942	0.632792	0.686162	0.614465	0.879454	0.639519	0.595024	0.615423	0.619292	0.603784	0.60865	0.657696	0.685217	0.650056	0.84134	0.581344	0.685217	0.6491	0.624121	0.605738	0.612528	0.602812	0.651013	0.636638	0.6491	0.615423	0.603784	0.641438	0.643355	0.675757	0.641438	0.564644	0.692762	0.734831	0.638559	0.695587	0.62605	0.638559	0.641438	0.588192	0.6491	0.598921
11	states	0.6491	0.6491	0.6491	0.6491	0.6491	0.6491	0.6491	0.6491	0.6491	0.6491	0.815647	0.6491	0.6491	0.6491	0.6491	0.6491	0.6491	0.6491	0.6491	0.6491	0.815647	0.6491	0.6491	0.6491	0.6491	0.6491	0.6491	0.6491	0.6491	0.6491	0.6491	0.6491	0.6491	0.6491	0.6491	0.6491	0.6491	0.6491	0.6491	0.6491	0.6491	0.6491	0.6491	0.6491	0.6491	0.6491	0.6491	0.6491
11	clusters	0.601292	0.601292	0.601292	0.601292	0.601292	0.601292	0.601292	0.601292	0.601292	0.601292	0.869597	0.601292	0.601292	0.601292	0.601292	0.601292	0.601292	0.601292	0.601292	0.601292	0.869597	0.601292	0.601292	0.601292	0.601292	0.601292	0.601292	0.601292	0.601292	0.601292	0.601292	0.601292	0.601292	0.601292	0.601292	0.601292	0.601292	0.601292	0.601292	0.601292	0.601292	0.601292	0.601292	0.601292	0.601292	0.601292	0.601292	0.601292
12	fret	0.710982	0.537109	0.545174	0.588743	0.509953	0.496923	0.591794	0.572496	0.499927	0.85272	0.568441	0.542146	0.567427	0.536101	0.523013	0.454024	0.557304	0.568441	0.679924	0.52603	0.596883	0.544165	0.517986	0.498925	0.539125	0.607073	0.567427	0.71202	0.571482	0.521002	0.609114	0.538117	0.500929	0.550223	0.666524	0.568441	0.490918	0.486918	0.507947	0.580613	0.608093	0.424278	0.563376	0.57351	0.488918	0.555281	0.525024	0.885738
12	states	0.721375	0.534085	0.534085	0.534085	0.534085	0.534085	0.534085	0.534085	0.534085	0.721375	0.534085	0.534085	0.534085	0.534085	0.534085	0.534085	0.534085	0.534085	0.721375	0.534085	0.534085	0.534085	0.534085	0.534085	0.534085	0.534085	0.534085	0.721375	0.534085	0.534085	0.534085	0.534085	0.534085	0.534085	0.721375	0.534085	0.534085	0.534085	0.534085	0.534085	0.534085	0.534085	0.534085	0.534085	0.534085	0.534085	0.534085	0.943683
12	clusters	0.601292	0.601292	0.601292	0.601292	0.601292	0.601292	0.601292	0.601292	0.601292	0.601292	0.601292	0.601292	0.601292	0.601292	0.601292	0.601292	0.601292	0.601292	0.601292	0.601292	0.601292	0.601292	0.601292	0.601292	0.601292	0.601292	0.601292	0.601292	0.601292	0.601292	0.601292	0.601292	0.601292	0.601292	0.601292	0.601292	0.601292	0.601292	0.601292	0.601292	0.601292	0.601292	0.601292	0.601292	0.601292	0.601292	0.601292	0.869597
13	fret	0.637656	0.578145	0.960446	0.983354	0.914173	0.952481	0.935606	0.93026	0.674244	0.624083	0.607533	0.586005	0.563362	0.565337	0.655996	0.641525	0.648285	0.64925	0.64732	0.587967	0.66369	0.641525	0.661768	0.625054	0.64925	0.691447	0.631845	0.660807	0.629906	0.687631	0.569283	0.70097	0.511652	0.642491	0.691447	0.74727	0.630876	0.56731	0.617277	0.56435	0.60266	0.695259	0.820681	0.589929	0.634752	0.639591	0.607533	0.606558
13	states	0.633299	0.633299	0.93783	0.93783	0.93783	0.93783	0.93783	0.93783	0.633299	0.633299	0.633299	0.633299	0.633299	0.633299	0.633299	0.633299	0.633299	0.633299	0.633299	0.633299	0.633299	0.633299	0.633299	0.633299	0.633299	0.633299	0.633299	0.633299	0.633299	0.633299	0.633299	0.633299	0.633299	0.633299	0.633299	0.754772	0.633299	0.633299	0.633299	0.633299	0.633299	0.633299	0.754772	0.633299	0.633299	0.633299	0.633299	0.633299
13	clusters	0.601292	0.601292	0.869597	0.869597	0.869597	0.869597	0.869597	0.869597	0.601292	0.601292	0.601292	0.601292	0.601292	0.601292	0.601292	0.601292	0.601292	0.601292	0.601292	0.601292	0.601292	0.601292	0.601292	0.601292	0.601292	0.601292	0.601292	0.601292	0.601292	0.601292	0.601292	0.601292	0.601292	0.601292	0.601292	0.869597	0.601292	0.601292	0.601292	0.601292	0.601292	0.601292	0.869597	0.601292	0.601292	0.601292	0.601292	0.601292
14	fret	0.726942	0.621887	0.559462	0.569399	0.590232	0.680946	0.6209	0.563438	0.654417	0.511612	0.664251	0.617937	0.56145	0.504613	0.574364	0.65048	0.583296	0.698589	0.866429	0.796955	0.581313	0.617937	0.608052	0.704466	0.609041	0.594195	0.58528	0.778532	0.938232	0.666217	0.605084	0.586271	0.58825	0.670147	0.618924	0.647526	0.631757	0.639645	0.61003	0.605084	0.571385	0.586271	0.678983	0.635702	0.608052	0.659336	0.692712	0.619912
14	states	0.88851	0.612007	0.612007	0.612007	0.612007	0.612007	0.612007	0.612007	0.612007	0.612007	0.612007	0.612007	0.612007	0.612007	0.612007	0.612007	0.644572	0.644572	0.88851	0.88851	0.644572	0.644572	0.644572	0.644572	0.644572	0.644572	0.644572	0.88851	0.88851	0.612007	0.612007	0.612007	0.612007	0.612007	0.612007	0.612007	0.612007	0.612007	0.612007	0.612007	0.612007	0.612007	0.612007	0.612007	0.612007	0.612007	0.612007	0.612007
14	clusters	0.869597	0.601292	0.601292	0.601292	0.601292	0.601292	0.601292	0.601292	0.601292	0.601292	0.601292	0.601292	0.601292	0.601292	0.601292	0.601292	0.601292	0.601292	0.869597	0.869597	0.601292	0.601292	0.601292	0.601292	0.601292	0.601292	0.601292	0.869597	0.869597	0.601292	0.601292	0.601292	0.601292	0.601292	0.601292	0.601292	0.601292	0.601292	0.601292	0.601292	0.601292	0.601292	0.601292	0.601292	0.601292	0.601292	0.601292	0.601292
15	fret	0.660596	0.579428	0.653256	0.616924	0.558736	0.554754	0.635698	0.6036	0.605513	0.643123	0.578451	0.613133	0.545745	0.656004	0.591092	0.665144	0.521389	0.661507	0.621646	0.599766	0.640344	0.549757	0.606468	0.621646	0.645896	0.631033	0.686698	0.599766	0.619759	0.55575	0.642198	0.663327	0.609329	0.55575	0.634766	0.648661	0.621646	0.625409	0.596882	0.684916	0.599766	0.652339	0.645896	0.605513	0.579428	0.666052	0.613133	0.639416
15	states	0.622117	0.622117	0.622117	0.622117	0.622117	0.622117	0.622117	0.622117	0.622117	0.622117	0.622117	0.622117	0.622117	0.622117	0.622117	0.622117	0.622117	0.622117	0.622117	0.622117	0.622117	0.622117	0.622117	0.622117	0.622117	0.622117	0.622117	0.622117	0.622117	0.622117	0.622117	0.622117	0.622117	0.622117	0.622117	0.622117	0.622117	0.622117	0.622117	0.622117	0.622117	0.622117	0.622117	0.622117	0.622117	0.622117	0.622117	0.622117
15	clusters	0.601292	0.601292	0.601292	0.601292	0.601292	0.601292	0.601292	0.601292	0.601292	0.601292	0.601292	0.601292	0.601292	0.601292	0.601292	0.601292	0.601292	0.601292	0.601292	0.601292	0.601292	0.601292	0.601292	0.601292	0.601292	0.601292	0.601292	0.601292	0.601292	0.601292	0.601292	0.601292	0.601292	0.601292	0.601292	0.601292	0.601292	0.601292	0.601292	0.601292	0.601292	0.601292	0.601292	0.601292	0.601292	0.601292	0.601292	0.601292
16	fret	0.551819	0.608993	0.619278	0.589514	0.56096	0.621338	0.664802	0.788111	0.664802	0.66273	0.539654	0.590537	0.576234	0.600781	0.483346	0.61002	0.533593	0.593608	0.594632	0.528543	0.543704	0.597706	0.595656	0.582359	0.61619	0.893959	1.03363	0.600781	0.639918	0.541678	0.467385	0.570118	0.554864	0.576234	0.622368	0.636816	0.552834	0.556895	0.613104	0.533593	0.675221	0.871076	0.938958	0.840737	0.614133	0.56096	0.629587	0.586446
16	states	0.571137	0.571137	0.571137	0.571137	0.571137	0.571137	0.571137	0.860772	0.571137	0.571137	0.571137	0.571137	0.571137	0.571137	0.571137	0.571137	0.571137	0.571137	0.571137	0.571137	0.571137	0.571137	0.571137	0.571137	0.571137	0.860772	0.860772	0.571137	0.571137	0.571137	0.571137	0.571137	0.571137	0.571137	0.571137	0.571137	0.571137	0.571137	0.571137	0.571137	0.571137	0.860772	0.860772	0.860772	0.571137	0.571137	0.571137	0.571137
16	clusters	0.601292	0.601292	0.601292	0.601292	0.601292	0.601292	0.601292	0.869597	0.601292	0.601292	0.601292	0.601292	0.601292	0.601292	0.601292	0.601292	0.601292	0.601292	0.601292	0.601292	0.601292	0.601292	0.601292	0.601292	0.601292	0.869597	0.869597	0.601292	0.601292	0.601292	0.601292	0.601292	0.601292	0.601292	0.601292	0.601292	0.601292	0.601292	0.601292	0.601292	0.601292	0.869597	0.869597	0.869597	0.601292	0.601292	0.601292	0.601292
17	fret	0.597884	0.581929	0.564968	0.56397	0.565966	0.610841	0.594893	0.531019	0.566965	0.572952	0.635743	0.869837	0.910325	0.568961	0.589908	0.577939	0.520027	0.599878	0.596887	0.556984	0.575945	0.580932	0.755988	0.606855	0.592899	0.565966	0.580932	0.55898	0.572952	0.608848	0.554987	0.565966	0.542007	0.598881	0.570957	0.575945	0.550994	0.582927	0.56397	0.59589	0.567963	0.623793	0.83721	0.667589	0.542007	0.616819	0.576943	0.609844
17	states	0.57395	0.57395	0.57395	0.57395	0.57395	0.57395	0.57395	0.57395	0.57395	0.57395	0.57395	0.68847	0.68847	0.57395	0.57395	0.57395	0.57395	0.57395	0.57395	0.57395	0.57395	0.57395	0.68847	0.57395	0.57395	0.57395	0.57395	0.57395	0.57395	0.57395	0.57395	0.57395	0.57395	0.57395	0.57395	0.57395	0.57395	0.57395	0.57395	0.57395	0.57395	0.57395	0.68847	0.68847	0.57395	0.57395	0.57395	0.57395
17	clusters	0.601292	0.601292	0.601292	0.601292	0.601292	0.601292	0.601292	0.601292	0.601292	0.601292	0.601292	0.601292	0.601292	0.601292	0.601292	0.601292	0.601292	0.601292	0.601292	0.601292	0.601292	0.601292	0.601292	0.601292	0.601292	0.601292	0.601292	0.601292	0.601292	0.601292	0.601292	0.601292	0.601292	0.601292	0.601292	0.601292	0.601292	0.601292	0.601292	0.601292	0.601292	0.601292	0.601292	0.601292	0.601292	0.601292	0.601292	0.601292
18	fret	0.565225	0.643491	0.596721	0.568188	0.638643	0.581	0.609436	0.627958	0.602597	0.564237	0.698341	0.625039	0.545421	0.565225	0.562261	0.641552	0.652201	0.63379	0.628931	0.634761	0.63379	0.600639	0.674376	0.642522	0.614318	0.593779	0.628931	0.578047	0.589846	0.565225	0.617245	0.588864	0.614318	0.581	0.582967	0.62017	0.581	0.603569	0.584934	0.628931	0.642522	0.581	0.611389	0.565225	0.640583	0.562261	0.637673	0.697386
18	states	0.565225	0.613342	0.613342	0.613342	0.613342	0.613342	0.613342	0.613342	0.613342	0.613342	0.613342	0.613342	0.613342	0.613342	0.613342	0.613342	0.613342	0.613342	0.613342	0.613342	0.613342	0.613342	0.613342	0.613342	0.613342	0.613342	0.613342	0.613342	0.613342	0.613342	0.613342	0.613342	0.613342	0.613342	0.613342	0.613342	0.613342	0.613342	0.613342	0.613342	0.613342	0.613342	0.613342	0.613342	0.613342	0.613342	0.613342	0.613342
18	clusters	0.601292	0.601292	0.601292	0.601292	0.601292	0.601292	0.601292	0.601292	0.601292	0.601292	0.601292	0.601292	0.601292	0.601292	0.601292	0.601292	0.601292	0.601292	0.601292	0.601292	0.601292	0.601292	0.601292	0.601292	0.601292	0.601292	0.601292	0.601292	0.601292	0.601292	0.601292	0.601292	0.601292	0.601292	0.601292	0.601292	0.601292	0.601292	0.601292	0.601292	0.601292	0.601292	0.601292	0.601292	0.601292	0.601292	0.601292	0.601292
19	fret	0.621518	0.688088	0.703355	0.727261	0.74297	0.697985	0.622464	0.626243	0.688991	0.654271	0.609157	0.709592	0.725504	0.66441	0.729891	0.598614	0.683566	0.679937	0.645942	0.65612	0.759382	0.735138	0.587994	0.67721	0.571425	0.571425	0.697089	0.709592	0.671739	0.737754	0.768756	0.505252	0.465764	0.622464	0.488753	0.625299	0.754204	0.731642	0.737754	0.662572	0.807363	1.0344	0.953576	0.989992	0.691695	0.617726	0.758524	0.672652
19	states	0.672652	0.672652	0.672652	0.672652	0.672652	0.672652	0.672652	0.672652	0.672652	0.672652	0.672652	0.672652	0.672652	0.672652	0.672652	0.672652	0.672652	0.672652	0.672652	0.672652	0.672652	0.672652	0.672652	0.672652	0.672652	0.672652	0.672652	0.672652	0.672652	0.672652	0.672652	0.672652	0.672652	0.672652	0.672652	0.672652	0.672652	0.672652	0.672652	0.672652	0.672652	0.948009	0.948009	0.948009	0.672652	0.672652	0.672652	0.672652
19	clusters	0.601292	0.601292	0.601292	0.601292	0.601292	0.601292	0.601292	0.601292	0.601292	0.601292	0.601292	0.601292	0.601292	0.601292	0.601292	0.601292	0.601292	0.601292	0.601292	0.601292	0.601292	0.601292	0.601292	0.601292	0.601292	0.601292	0.601292	0.601292	0.601292	0.601292	0.601292	0.601292	0.601292	0.601292	0.601292	0.601292	0.601292	0.601292	0.601292	0.601292	0.601292	0.869597	0.869597	0.869597	0.601292	0.601292	0.601292	0.601292
20	fret	0.610389	0.633319	0.63237	0.637097	0.606543	0.8211	0.955141	0.909929	0.769718	0.674618	0.730451	0.720504	0.62188	0.685733	0.559791	0.715965	0.701367	0.694026	0.606543	0.699535	0.701367	0.652194	0.740363	0.696782	0.72684	0.657825	0.670899	0.763526	0.916459	0.98439	0.935905	0.963094	0.900912	1.00545	0.680184	0.63142	0.680184	0.638044	0.802108	0.620925	0.73855	0.610389	0.612309	0.653133	0.744843	0.667173	0.61997	0.498726
20	states	0.647489	0.647489	0.647489	0.647489	0.647489	0.796023	0.951151	0.951151	0.796023	0.647489	0.647489	0.647489	0.647489	0.647489	0.647489	0.647489	0.647489	0.647489	0.647489	0.647489	0.647489	0.647489	0.647489	0.647489	0.647489	0.647489	0.647489	0.796023	0.951151	0.951151	0.951151	0.951151	0.951151	0.951151	0.647489	0.647489	0.647489	0.647489	0.796023	0.647489	0.647489	0.647489	0.647489	0.647489	0.647489	0.647489	0.647489	0.647489
20	clusters	0.601292	0.601292	0.601292	0.601292	0.601292	0.869597	0.869597	0.869597	0.869597	0.601292	0.601292	0.601292	0.601292	0.601292	0.601292	0.601292	0.601292	0.601292	0.601292	0.601292	0.601292	0.601292	0.601292	0.601292	0.601292	0.601292	0.601292	0.869597	0.869597	0.869597	0.869597	0.869597	0.869597	0.869597	0.601292	0.601292	0.601292	0.601292	0.869597	0.601292	0.601292	0.601292	0.601292	0.601292	0.601292	0.601292	0.601292	0.601292
[truncated: 1,050 more columns]

## Sheet: 242-417_inter_liposome
1	fret	0.407551	0.391204	0.420169	0.462642	0.445713	0.412392	0.373135	0.379767	0.426027	0.521791	0.424072	0.385475	0.406585	0.375027	0.680928	0.496027	0.564952	0.422119	0.448687	0.328411	0.406585	0.412392	0.38357	0.431907	0.389292	0.408518	0.426027	0.411423	0.426027	0.393118	0.405619	0.441756	0.554319	0.601628	0.420169	0.437809	0.391204	0.377869	0.344101	0.415304	0.395035	0.444723	0.408518	0.463643	0.395994	0.402725	0.382618	0.735545
1	states	0.402725	0.402725	0.402725	0.402725	0.402725	0.402725	0.402725	0.402725	0.402725	0.402725	0.402725	0.402725	0.402725	0.402725	0.644722	0.644722	0.644722	0.402725	0.402725	0.402725	0.402725	0.402725	0.402725	0.402725	0.402725	0.402725	0.402725	0.402725	0.402725	0.402725	0.402725	0.402725	0.644722	0.644722	0.402725	0.402725	0.402725	0.402725	0.402725	0.402725	0.402725	0.402725	0.402725	0.402725	0.402725	0.402725	0.402725	0.644722
1	clusters	0.399993	0.399993	0.399993	0.399993	0.399993	0.399993	0.399993	0.399993	0.399993	0.399993	0.399993	0.399993	0.399993	0.399993	0.818179	0.818179	0.818179	0.399993	0.399993	0.399993	0.399993	0.399993	0.399993	0.399993	0.399993	0.399993	0.399993	0.399993	0.399993	0.399993	0.399993	0.399993	0.818179	0.818179	0.399993	0.399993	0.399993	0.399993	0.399993	0.399993	0.399993	0.399993	0.399993	0.399993	0.399993	0.399993	0.399993	0.818179
2	fret	0.403241	0.409997	0.439367	0.439367	0.50959	0.420687	0.385084	0.460337	0.44931	0.349547	0.404204	0.406132	0.387934	0.35047	0.417763	0.388885	0.358801	0.422641	0.427537	0.474492	0.735655	0.447315	0.319486	0.646017	0.749262	0.512731
2	states	0.422641	0.50959	0.422641	0.422641	0.50959	0.422641	0.422641	0.422641	0.422641	0.350009	0.350009	0.50959	0.422641	0.350009	0.50959	0.422641	0.422641	0.422641	0.50959	0.422641	0.50959	0.422641	0.350009	0.50959	0.50959	0.50959
2	clusters	0.399993	0.399993	0.399993	0.399993	0.399993	0.399993	0.399993	0.399993	0.399993	0.399993	0.399993	0.399993	0.399993	0.399993	0.399993	0.399993	0.399993	0.399993	0.399993	0.399993	0.399993	0.399993	0.399993	0.399993	0.399993	0.399993
3	fret	0.185664	0.193093	0.498257	0.431583	0.901606	0.843421	0.856526	0.928218	0.99209	0.889465	0.896083	0.958355	0.741089	0.897187	0.626677	0.983068	0.976314	0.93824	0.847785	0.909351	0.611177	0.428623	0.854339	0.892772	0.89167	0.697683	0.959475	0.754946	0.144139	0.213595	0.121259	0.210793	0.157932	0.165308	0.165308	0.318692	0.0713954	0.218269	0.127651	0.209859	0.193093	0.200536	0.185664	0.186592	0.168077	0.178249	0.174547	0.236083
3	states	0.20706	0.20706	0.20706	0.20706	0.894428	0.894428	0.894428	0.894428	0.894428	0.894428	0.894428	0.894428	0.894428	0.894428	0.894428	0.894428	0.894428	0.894428	0.894428	0.894428	0.894428	0.20706	0.894428	0.894428	0.894428	0.894428	0.894428	0.894428	0.20706	0.20706	0.20706	0.20706	0.20706	0.20706	0.20706	0.20706	0.20706	0.20706	0.20706	0.20706	0.20706	0.20706	0.20706	0.20706	0.20706	0.20706	0.20706	0.20706
3	clusters	0.399993	0.399993	0.399993	0.399993	0.818179	0.818179	0.818179	0.818179	0.818179	0.818179	0.818179	0.818179	0.818179	0.818179	0.818179	0.818179	0.818179	0.818179	0.818179	0.818179	0.818179	0.399993	0.818179	0.818179	0.818179	0.818179	0.818179	0.818179	0.399993	0.399993	0.399993	0.399993	0.399993	0.399993	0.399993	0.399993	0.399993	0.399993	0.399993	0.399993	0.399993	0.399993	0.399993	0.399993	0.399993	0.399993	0.399993	0.399993
4	fret	0.201239	0.249306	0.137786	0.19007	0.137786	0.235185	0.208148	0.222922	0.196934	0.188358	0.0559548	0.224669	0.209013	0.223795	0.193499	0.239585	0.157837	0.297826	0.227292	0.261757	0.232544	0.270705	0.266225	0.138616	0.242231	0.213348	0.230789	0.231666	0.196075	0.228167	0.198655	0.141114	0.199516	0.171334	0.183233	0.227292	0.190927	0.146113	0.258191	0.223795	0.202101	0.226417	0.143612	0.125379	0.251967	0.261757	0.131159	0.146948
4	states	0.20858	0.20858	0.20858	0.20858	0.20858	0.20858	0.20858	0.20858	0.20858	0.20858	0.20858	0.20858	0.20858	0.20858	0.20858	0.20858	0.20858	0.20858	0.20858	0.20858	0.20858	0.20858	0.20858	0.20858	0.20858	0.20858	0.20858	0.20858	0.20858	0.20858	0.20858	0.20858	0.20858	0.20858	0.20858	0.20858	0.20858	0.20858	0.20858	0.20858	0.20858	0.20858	0.20858	0.20858	0.20858	0.20858	0.20858	0.20858
4	clusters	0.399993	0.399993	0.399993	0.399993	0.399993	0.399993	0.399993	0.399993	0.399993	0.399993	0.399993	0.399993	0.399993	0.399993	0.399993	0.399993	0.399993	0.399993	0.399993	0.399993	0.399993	0.399993	0.399993	0.399993	0.399993	0.399993	0.399993	0.399993	0.399993	0.399993	0.399993	0.399993	0.399993	0.399993	0.399993	0.399993	0.399993	0.399993	0.399993	0.399993	0.399993	0.399993	0.399993	0.399993	0.399993	0.399993	0.399993	0.399993
5	fret	0.731532	0.664023	0.783934	0.846158	0.852895	0.909584	1.01293	0.67358	0.922187	0.828258	0.938297	0.739121	0.85852	0.922187	0.846158	0.796063	0.789428	0.947538	0.812676	0.740207	0.898168	0.789428	0.925633	0.816009	0.785035	0.927932	0.704572	0.85852	0.882252	0.883386	0.937144	0.957965	0.961448	0.911872	0.87093	0.931383	0.98593	0.714252	0.779535	0.879984	0.717484	0.616661	0.592725	0.742379	0.923335	0.893613	0.900448	0.741293
5	states	0.697064	0.697064	0.866412	0.866412	0.866412	0.866412	0.866412	0.697064	0.866412	0.866412	0.866412	0.697064	0.866412	0.866412	0.866412	0.866412	0.866412	0.866412	0.866412	0.697064	0.866412	0.866412	0.866412	0.866412	0.866412	0.866412	0.697064	0.866412	0.866412	0.866412	0.866412	0.866412	0.866412	0.866412	0.866412	0.866412	0.866412	0.697064	0.866412	0.866412	0.697064	0.697064	0.697064	0.697064	0.866412	0.866412	0.866412	0.697064
5	clusters	0.818179	0.818179	0.818179	0.818179	0.818179	0.818179	0.818179	0.818179	0.818179	0.818179	0.818179	0.818179	0.818179	0.818179	0.818179	0.818179	0.818179	0.818179	0.818179	0.818179	0.818179	0.818179	0.818179	0.818179	0.818179	0.818179	0.818179	0.818179	0.818179	0.818179	0.818179	0.818179	0.818179	0.818179	0.818179	0.818179	0.818179	0.818179	0.818179	0.818179	0.818179	0.818179	0.818179	0.818179	0.818179	0.818179	0.818179	0.818179
6	fret	0.941784	0.932202	0.916705	0.985328	0.971948	1.01969	0.957427	0.550257	0.377083	0.325765	0.386709	0.35509	0.300509	0.667409	0.895395	0.903662	1.00611	0.947789	0.887153	0.96105	0.849801	0.959842	1.00366	0.64481	0.405103	0.378044	0.304233	0.581385	0.979238	1.01103	0.964678	1.04325	0.936989	0.952604	0.391536	0.329529	0.32013	0.337074	0.976806	0.96831	0.931007	0.874254	0.973161	1.00491	0.959842	0.66417	0.274612	0.269098
6	states	0.935791	0.935791	0.935791	0.935791	0.935791	0.935791	0.935791	0.378044	0.378044	0.378044	0.378044	0.378044	0.378044	0.378044	0.935791	0.935791	0.935791	0.935791	0.935791	0.935791	0.935791	0.935791	0.935791	0.378044	0.378044	0.378044	0.378044	0.378044	0.935791	0.935791	0.935791	0.935791	0.935791	0.935791	0.378044	0.378044	0.378044	0.378044	0.935791	0.935791	0.935791	0.935791	0.935791	0.935791	0.935791	0.378044	0.378044	0.378044
6	clusters	0.818179	0.818179	0.818179	0.818179	0.818179	0.818179	0.818179	0.399993	0.399993	0.399993	0.399993	0.399993	0.399993	0.399993	0.818179	0.818179	0.818179	0.818179	0.818179	0.818179	0.818179	0.818179	0.818179	0.399993	0.399993	0.399993	0.399993	0.399993	0.818179	0.818179	0.818179	0.818179	0.818179	0.818179	0.399993	0.399993	0.399993	0.399993	0.818179	0.818179	0.818179	0.818179	0.818179	0.818179	0.818179	0.399993	0.399993	0.399993
7	fret	0.637976	0.818643	0.869251	0.913724	0.958925	0.83579	0.933854	0.815226	0.931479	0.900776	0.856511	0.924363	0.84153	0.750008	0.753343	0.883217	0.86577	0.840381	0.901951	0.850739	0.918447	0.856511	0.800471	0.898428	0.856511	0.916085	0.876225	0.879719	0.891398	0.889058	0.878554	0.831207	0.873899	0.529511	0.328328	0.178381	0.382668	0.306735	0.42642	0.515241	0.925548	0.877389	0.872736	0.741136	0.827774	0.883217	0.906654	0.948153
7	states	0.382186	0.900776	0.900776	0.900776	0.900776	0.900776	0.900776	0.900776	0.900776	0.900776	0.900776	0.900776	0.900776	0.900776	0.900776	0.900776	0.900776	0.900776	0.900776	0.900776	0.900776	0.900776	0.900776	0.900776	0.900776	0.900776	0.900776	0.900776	0.900776	0.900776	0.900776	0.900776	0.900776	0.382186	0.382186	0.382186	0.382186	0.382186	0.382186	0.382186	0.900776	0.900776	0.900776	0.900776	0.900776	0.900776	0.900776	0.900776
7	clusters	0.399993	0.818179	0.818179	0.818179	0.818179	0.818179	0.818179	0.818179	0.818179	0.818179	0.818179	0.818179	0.818179	0.818179	0.818179	0.818179	0.818179	0.818179	0.818179	0.818179	0.818179	0.818179	0.818179	0.818179	0.818179	0.818179	0.818179	0.818179	0.818179	0.818179	0.818179	0.818179	0.818179	0.399993	0.399993	0.399993	0.399993	0.399993	0.399993	0.399993	0.818179	0.818179	0.818179	0.818179	0.818179	0.818179	0.818179	0.818179
8	fret	0.96759	0.689249	0.641508	0.630364	0.949857	0.897864	0.88335	0.896827	0.879207	0.902015	0.722894	0.959242	0.556694	0.88335	0.770992	1.00523	0.862648	0.581869	0.664845	0.59801	0.318942	0.650633	0.896827	0.872994	0.736177	0.899939	0.922791	0.82239	0.76484	0.522555	0.891642	0.909282	0.897864	0.904091	0.845082	0.597001	0.888532	0.532586	0.934234	0.878171	0.781252	0.748452	0.759716	0.907205	0.805913	0.885422	0.849213	0.856445
8	states	0.867303	0.678054	0.678054	0.678054	0.867303	0.867303	0.867303	0.867303	0.867303	0.867303	0.678054	0.867303	0.678054	0.867303	0.867303	0.867303	0.867303	0.678054	0.678054	0.678054	0.423747	0.678054	0.867303	0.867303	0.867303	0.867303	0.867303	0.867303	0.867303	0.678054	0.867303	0.867303	0.867303	0.867303	0.867303	0.678054	0.867303	0.678054	0.867303	0.867303	0.867303	0.678054	0.867303	0.867303	0.867303	0.867303	0.867303	0.867303
8	clusters	0.818179	0.818179	0.818179	0.818179	0.818179	0.818179	0.818179	0.818179	0.818179	0.818179	0.818179	0.818179	0.818179	0.818179	0.818179	0.818179	0.818179	0.818179	0.818179	0.818179	0.399993	0.818179	0.818179	0.818179	0.818179	0.818179	0.818179	0.818179	0.818179	0.818179	0.818179	0.818179	0.818179	0.818179	0.818179	0.818179	0.818179	0.818179	0.818179	0.818179	0.818179	0.818179	0.818179	0.818179	0.818179	0.818179	0.818179	0.818179
9	fret	0.879136	1.02543	0.891673	0.614736	0.349083	0.849951	0.963045	0.845789	0.663531	0.452996	0.469936	0.44603	0.938842	0.652325	1.02861	0.845789	0.890628	1.09572	0.967261	0.974643	1.08717	0.892719	0.901087	0.918896	0.990483	0.898994	0.965153	0.38556	0.478917	0.379635	0.372726	0.362867	0.561167	0.507918	0.76811	0.978865	0.888537	0.948305	0.889582	0.841629	0.88018	0.896902	1.02543	0.927289	0.782559	0.247355	0.427151	0.396434
9	states	0.919945	0.919945	0.919945	0.467941	0.467941	0.919945	0.919945	0.919945	0.467941	0.467941	0.467941	0.467941	0.919945	0.467941	0.919945	0.919945	0.919945	0.919945	0.919945	0.919945	0.919945	0.919945	0.919945	0.919945	0.919945	0.919945	0.919945	0.467941	0.467941	0.467941	0.467941	0.467941	0.467941	0.467941	0.919945	0.919945	0.919945	0.919945	0.919945	0.919945	0.919945	0.919945	0.919945	0.919945	0.919945	0.467941	0.467941	0.467941
9	clusters	0.818179	0.818179	0.818179	0.399993	0.399993	0.818179	0.818179	0.818179	0.399993	0.399993	0.399993	0.399993	0.818179	0.399993	0.818179	0.818179	0.818179	0.818179	0.818179	0.818179	0.818179	0.818179	0.818179	0.818179	0.818179	0.818179	0.818179	0.399993	0.399993	0.399993	0.399993	0.399993	0.399993	0.399993	0.818179	0.818179	0.818179	0.818179	0.818179	0.818179	0.818179	0.818179	0.818179	0.818179	0.818179	0.399993	0.399993	0.399993
10	fret	0.705076	0.630252	0.652515	0.667627	0.712992	0.619299	0.698523	0.590657	0.656272	0.701139	0.667627	0.705076	0.712992	0.724933	0.712992	0.663828	0.67144	0.603684	0.749359	0.712992	0.638853	0.698523	0.663828	0.707708	0.697218	0.589481
10	states	0.684329	0.684329	0.684329	0.684329	0.684329	0.684329	0.684329	0.684329	0.684329	0.684329	0.684329	0.684329	0.684329	0.684329	0.684329	0.684329	0.684329	0.684329	0.684329	0.684329	0.684329	0.684329	0.684329	0.684329	0.684329	0.684329
10	clusters	0.818179	0.818179	0.818179	0.818179	0.818179	0.818179	0.818179	0.818179	0.818179	0.818179	0.818179	0.818179	0.818179	0.818179	0.818179	0.818179	0.818179	0.818179	0.818179	0.818179	0.818179	0.818179	0.818179	0.818179	0.818179	0.818179
11	fret	0.790618	0.600202	0.907346	0.964821	0.557739	0.685423	0.826032	0.663375	0.878023	0.864868	0.866178	0.846628	0.924923	0.845333	0.687763	0.804437	0.810758	0.263325	0.342932	0.359621	0.379353	0.801916	0.601307	0.881991	0.864868	0.914084	0.795629	0.783132	0.91814	0.895286	0.868803	0.680755	0.864868	0.780644	0.850519	0.893952	0.779401	0.866178	0.623581	0.799398	0.427503	0.864868	0.881991	0.521699	0.368043	0.559887	0.796885	0.866178
11	states	0.862249	0.663375	0.862249	0.862249	0.663375	0.663375	0.862249	0.663375	0.862249	0.862249	0.862249	0.862249	0.862249	0.862249	0.663375	0.862249	0.862249	0.368513	0.368513	0.368513	0.368513	0.862249	0.663375	0.862249	0.862249	0.862249	0.862249	0.862249	0.862249	0.862249	0.862249	0.663375	0.862249	0.862249	0.862249	0.862249	0.862249	0.862249	0.663375	0.862249	0.368513	0.862249	0.862249	0.663375	0.368513	0.663375	0.862249	0.862249
11	clusters	0.818179	0.818179	0.818179	0.818179	0.818179	0.818179	0.818179	0.818179	0.818179	0.818179	0.818179	0.818179	0.818179	0.818179	0.818179	0.818179	0.818179	0.399993	0.399993	0.399993	0.399993	0.818179	0.818179	0.818179	0.818179	0.818179	0.818179	0.818179	0.818179	0.818179	0.818179	0.818179	0.818179	0.818179	0.818179	0.818179	0.818179	0.818179	0.818179	0.818179	0.399993	0.818179	0.818179	0.818179	0.399993	0.818179	0.818179	0.818179
12	fret	0.787558	0.852646	0.835566	0.789931	0.84653	0.835566	0.861242	0.784004	0.64471	0.707405	0.803034	0.649121	0.69719	0.648017	0.736067	0.678041	0.593641	0.641409	0.663526	0.643609	0.649121	0.710822	0.724551	0.703994	0.631521	0.746489	0.708543	0.674682	0.54184	0.525235	0.60116	0.63371	0.851422	0.758136	0.852646	0.829501	0.878543	0.861242	0.837997	0.739535	0.917388	0.873584	0.840431	0.860011	0.778095	0.815021	0.884758	0.930079
12	states	0.845309	0.845309	0.845309	0.845309	0.845309	0.845309	0.845309	0.845309	0.594713	0.594713	0.845309	0.594713	0.594713	0.594713	0.594713	0.594713	0.594713	0.594713	0.594713	0.594713	0.594713	0.594713	0.594713	0.594713	0.594713	0.594713	0.594713	0.594713	0.594713	0.594713	0.594713	0.594713	0.845309	0.845309	0.845309	0.845309	0.845309	0.845309	0.845309	0.845309	0.845309	0.845309	0.845309	0.845309	0.845309	0.845309	0.845309	0.845309
12	clusters	0.818179	0.818179	0.818179	0.818179	0.818179	0.818179	0.818179	0.818179	0.399993	0.399993	0.818179	0.399993	0.399993	0.399993	0.399993	0.399993	0.399993	0.399993	0.399993	0.399993	0.399993	0.399993	0.399993	0.399993	0.399993	0.399993	0.399993	0.399993	0.399993	0.399993	0.399993	0.399993	0.818179	0.818179	0.818179	0.818179	0.818179	0.818179	0.818179	0.818179	0.818179	0.818179	0.818179	0.818179	0.818179	0.818179	0.818179	0.818179
13	fret	0.899529	0.813127	0.888865	0.893599	0.916207	0.911431	0.867666	0.846641	0.948676	0.875889	0.853631	0.992606	0.865322	0.80053	0.922189	0.846641	0.900717	0.890047	0.903094	0.871187	0.8806	0.859469	0.838511	0.368853	0.859469	0.70195
13	states	0.873538	0.873538	0.873538	0.873538	0.873538	0.873538	0.873538	0.873538	0.873538	0.873538	0.873538	0.873538	0.873538	0.873538	0.873538	0.873538	0.873538	0.873538	0.873538	0.873538	0.873538	0.873538	0.873538	0.873538	0.873538	0.873538
13	clusters	0.818179	0.818179	0.818179	0.818179	0.818179	0.818179	0.818179	0.818179	0.818179	0.818179	0.818179	0.818179	0.818179	0.818179	0.818179	0.818179	0.818179	0.818179	0.818179	0.818179	0.818179	0.818179	0.818179	0.818179	0.818179	0.818179
14	fret	0.126651	0.0706417	0.0399035	0.091972	0.399066	0.579571	0.743521	0.739273	0.926443	0.976703	0.812537	0.509592	0.159662	0.460294	0.278139	0.473941	0.835589	0.834036	0.889815	0.800451	0.867146	0.907973	0.952151	0.926443	0.893093	0.91969	0.883288	0.904648	0.818634	0.962606	0.776703	0.931536	0.500813	0.563018	0.234641	0.422594	0.854408	0.701852	0.619823	0.125309	0.0743558	0.348445	0.482449	0.824767	0.807988	0.778171	0.527419	0.364039
14	states	0.234641	0.234641	0.234641	0.234641	0.542175	0.542175	0.88818	0.88818	0.88818	0.88818	0.88818	0.542175	0.234641	0.542175	0.234641	0.542175	0.88818	0.88818	0.88818	0.88818	0.88818	0.88818	0.88818	0.88818	0.88818	0.88818	0.88818	0.88818	0.88818	0.88818	0.88818	0.88818	0.542175	0.542175	0.234641	0.542175	0.88818	0.542175	0.542175	0.234641	0.234641	0.234641	0.542175	0.88818	0.88818	0.88818	0.542175	0.234641
14	clusters	0.399993	0.399993	0.399993	0.399993	0.399993	0.399993	0.818179	0.818179	0.818179	0.818179	0.818179	0.399993	0.399993	0.399993	0.399993	0.399993	0.818179	0.818179	0.818179	0.818179	0.818179	0.818179	0.818179	0.818179	0.818179	0.818179	0.818179	0.818179	0.818179	0.818179	0.818179	0.818179	0.399993	0.399993	0.399993	0.399993	0.818179	0.399993	0.399993	0.399993	0.399993	0.399993	0.399993	0.818179	0.818179	0.818179	0.399993	0.399993
15	fret	0.380328	0.400464	0.302015	0.292015	0.297462	0.338869	0.337008	0.422783	0.373667	0.355712	0.440446	0.661303	0.932627	0.994739	0.828291	0.990801	1.02248	0.985563	0.810217	0.890992	0.916123	0.75114	0.986872	0.789931	0.87111	0.923724	0.912334	0.833138	0.956989	1.03587	1.11365	0.955699	0.897246	0.996053	0.833138	0.862472	0.924993	0.888496	0.876062	0.908551	0.930079	0.864936	0.864936	1.03855	0.852646	0.917388	0.793496	0.893491
15	states	0.354772	0.354772	0.354772	0.354772	0.354772	0.354772	0.354772	0.354772	0.354772	0.354772	0.354772	0.888496	0.888496	0.888496	0.888496	0.888496	0.888496	0.888496	0.888496	0.888496	0.888496	0.888496	0.888496	0.888496	0.888496	0.888496	0.888496	0.888496	0.888496	0.888496	0.888496	0.888496	0.888496	0.888496	0.888496	0.888496	0.888496	0.888496	0.888496	0.888496	0.888496	0.888496	0.888496	0.888496	0.888496	0.888496	0.888496	0.888496
15	clusters	0.399993	0.399993	0.399993	0.399993	0.399993	0.399993	0.399993	0.399993	0.399993	0.399993	0.399993	0.818179	0.818179	0.818179	0.818179	0.818179	0.818179	0.818179	0.818179	0.818179	0.818179	0.818179	0.818179	0.818179	0.818179	0.818179	0.818179	0.818179	0.818179	0.818179	0.818179	0.818179	0.818179	0.818179	0.818179	0.818179	0.818179	0.818179	0.818179	0.818179	0.818179	0.818179	0.818179	0.818179	0.818179	0.818179	0.818179	0.818179
16	fret	0.377642	0.429046	0.711884	0.420124	0.447914	0.346179	0.432022	0.886644	0.541951	0.426071	0.4788	0.345198	0.404289	0.580293	0.907709	0.51382	0.374687	0.370748	0.711884	0.379612	0.878233	0.55908	0.361894	0.320711	0.393419	0.375671	0.355997	0.409234	0.44692	0.331473	0.62391	0.35305	0.498792	0.362877	0.494789	0.394409	0.349123	0.456868	0.384541	0.450898	0.335394	0.328538	0.44692	0.902437	0.43103	0.327559	0.608666	0.790461
16	states	0.380598	0.380598	0.640202	0.380598	0.380598	0.380598	0.380598	0.640202	0.640202	0.380598	0.380598	0.380598	0.380598	0.640202	0.640202	0.640202	0.380598	0.380598	0.640202	0.380598	0.640202	0.640202	0.380598	0.380598	0.380598	0.380598	0.380598	0.380598	0.380598	0.380598	0.640202	0.380598	0.380598	0.380598	0.380598	0.380598	0.380598	0.380598	0.380598	0.380598	0.380598	0.380598	0.380598	0.640202	0.380598	0.380598	0.640202	0.640202
16	clusters	0.399993	0.399993	0.818179	0.399993	0.399993	0.399993	0.399993	0.818179	0.818179	0.399993	0.399993	0.399993	0.399993	0.818179	0.818179	0.818179	0.399993	0.399993	0.818179	0.399993	0.818179	0.818179	0.399993	0.399993	0.399993	0.399993	0.399993	0.399993	0.399993	0.399993	0.818179	0.399993	0.399993	0.399993	0.399993	0.399993	0.399993	0.399993	0.399993	0.399993	0.399993	0.399993	0.399993	0.818179	0.399993	0.399993	0.818179	0.818179
17	fret	0.852697	0.746485	0.653595	0.61558	0.632059	0.774199	0.60164	0.619091	0.641581	0.684176	0.695381	0.594732	0.799822	0.738641	0.854119	0.881436	0.915299	0.799822	0.739938	0.634432	0.69413	0.704169	0.700395	0.640387	0.620264	0.736051	0.673075	0.656012	0.690388	0.719386	0.83156	0.728352	0.742576	0.706692	0.710486	0.657223	0.606268	0.739938	0.591265	0.643974	0.627327	0.583283	0.764892	0.60164	0.628508	0.598181	0.609751	0.691634
17	states	0.799822	0.799822	0.799822	0.671848	0.671848	0.671848	0.671848	0.671848	0.671848	0.671848	0.671848	0.671848	0.799822	0.799822	0.799822	0.799822	0.799822	0.799822	0.799822	0.671848	0.671848	0.671848	0.671848	0.671848	0.671848	0.671848	0.671848	0.671848	0.671848	0.671848	0.671848	0.671848	0.671848	0.671848	0.671848	0.671848	0.671848	0.671848	0.671848	0.671848	0.671848	0.671848	0.671848	0.671848	0.671848	0.671848	0.671848	0.671848
17	clusters	0.818179	0.818179	0.818179	0.818179	0.818179	0.818179	0.818179	0.818179	0.818179	0.818179	0.818179	0.818179	0.818179	0.818179	0.818179	0.818179	0.818179	0.818179	0.818179	0.818179	0.818179	0.818179	0.818179	0.818179	0.818179	0.818179	0.818179	0.818179	0.818179	0.818179	0.818179	0.818179	0.818179	0.818179	0.818179	0.818179	0.818179	0.818179	0.818179	0.818179	0.818179	0.818179	0.818179	0.818179	0.818179	0.818179	0.818179	0.818179
18	fret	0.804583	0.770245	0.39706	0.421261	0.396103	0.47229	0.883117	1.02177	0.898812	0.820738	0.839837	0.977042	1.02957	0.857818	0.978561	0.818032	0.866199	0.838463	0.584948	0.52889	0.457024	0.331972	0.286885	0.873222	0.866199	0.650824	0.775469	0.738021	0.738021	0.735516	0.911789	0.567077	0.700464	0.856426	0.622655	0.352017	0.238656	0.78203	0.862002	0.921967	0.990772	0.936639	0.935165	0.834352	0.832984	0.951467	0.76764	0.460057
18	states	0.856426	0.856426	0.33107	0.33107	0.33107	0.580455	0.856426	0.856426	0.856426	0.856426	0.856426	0.856426	0.856426	0.856426	0.856426	0.856426	0.856426	0.856426	0.580455	0.580455	0.33107	0.33107	0.33107	0.856426	0.856426	0.580455	0.856426	0.856426	0.856426	0.856426	0.856426	0.580455	0.580455	0.856426	0.580455	0.33107	0.33107	0.856426	0.856426	0.856426	0.856426	0.856426	0.856426	0.856426	0.856426	0.856426	0.856426	0.580455
18	clusters	0.818179	0.818179	0.399993	0.399993	0.399993	0.399993	0.818179	0.818179	0.818179	0.818179	0.818179	0.818179	0.818179	0.818179	0.818179	0.818179	0.818179	0.818179	0.399993	0.399993	0.399993	0.399993	0.399993	0.818179	0.818179	0.399993	0.818179	0.818179	0.818179	0.818179	0.818179	0.399993	0.399993	0.818179	0.399993	0.399993	0.399993	0.818179	0.818179	0.818179	0.818179	0.818179	0.818179	0.818179	0.818179	0.818179	0.818179	0.399993
19	fret	0.970317	1.01378	0.916102	1.00572	0.972592	0.929585	0.923962	0.961228	0.870386	0.881487	0.381371	0.265586	0.334992	0.358107	0.416551	0.39306	0.790308	0.89039	0.955559	0.956692	0.859317	0.828493	0.922838	0.91386	0.528221	0.468971	0.347494	0.326362	0.847178	0.884823	0.931837	0.923962	0.910498	0.966906	0.843874	0.878153	0.917224	0.852691	0.875933	0.946505	0.89485	0.960094	0.898198	0.927335	0.983989	0.964634	0.982848	0.919469
19	states	0.9234	0.9234	0.9234	0.9234	0.9234	0.9234	0.9234	0.9234	0.9234	0.9234	0.395989	0.395989	0.395989	0.395989	0.395989	0.395989	0.9234	0.9234	0.9234	0.9234	0.9234	0.9234	0.9234	0.9234	0.395989	0.395989	0.395989	0.395989	0.733202	0.9234	0.9234	0.9234	0.9234	0.9234	0.9234	0.9234	0.9234	0.9234	0.9234	0.9234	0.9234	0.9234	0.9234	0.9234	0.9234	0.9234	0.9234	0.9234
19	clusters	0.818179	0.818179	0.818179	0.818179	0.818179	0.818179	0.818179	0.818179	0.818179	0.818179	0.399993	0.399993	0.399993	0.399993	0.399993	0.399993	0.818179	0.818179	0.818179	0.818179	0.818179	0.818179	0.818179	0.818179	0.399993	0.399993	0.399993	0.399993	0.818179	0.818179	0.818179	0.818179	0.818179	0.818179	0.818179	0.818179	0.818179	0.818179	0.818179	0.818179	0.818179	0.818179	0.818179	0.818179	0.818179	0.818179	0.818179	0.818179
20	fret	0.907199	0.983178	0.974174	0.967766	0.957552	0.949923	0.914676	0.929711	0.975458	0.958826	0.944852	0.892322	0.90347	0.917175	0.952463	0.943586	0.962653	0.946119	0.889852	0.956278	0.941057	0.965208	0.736438	0.974174	0.423211
20	states	0.946119	0.946119	0.946119	0.946119	0.946119	0.946119	0.946119	0.946119	0.946119	0.946119	0.946119	0.946119	0.946119	0.946119	0.946119	0.946119	0.946119	0.946119	0.946119	0.946119	0.946119	0.946119	0.946119	0.946119	0.946119
20	clusters	0.818179	0.818179	0.818179	0.818179	0.818179	0.818179	0.818179	0.818179	0.818179	0.818179	0.818179	0.818179	0.818179	0.818179	0.818179	0.818179	0.818179	0.818179	0.818179	0.818179	0.818179	0.818179	0.818179	0.818179	0.818179
21	fret	0.907937	0.906601	0.909275	0.949911	0.844966	0.940341	0.746346	0.881407	0.906601	0.885359	0.926763	0.86569	0.889322	0.884041	0.917324	0.910614	0.854	0.902597	0.87484	0.903931	0.94307	0.891968	0.886679	0.889322	0.8131	0.897274	0.710435	0.8245	0.877464	0.894619	0.850122	0.901265	0.827044	0.898603	0.938978	0.885359	0.860484	0.889322	0.906601	0.894619	0.970602
21	states	0.895947	0.827044	0.895947	0.895947	0.827044	0.895947	0.827044	0.895947	0.895947	0.895947	0.895947	0.895947	0.895947	0.895947	0.895947	0.895947	0.827044	0.895947	0.895947	0.895947	0.895947	0.895947	0.895947	0.895947	0.827044	0.895947	0.827044	0.895947	0.895947	0.895947	0.895947	0.895947	0.827044	0.895947	0.895947	0.895947	0.895947	0.895947	0.895947	0.895947	0.895947
21	clusters	0.818179	0.818179	0.818179	0.818179	0.818179	0.818179	0.818179	0.818179	0.818179	0.818179	0.818179	0.818179	0.818179	0.818179	0.818179	0.818179	0.818179	0.818179	0.818179	0.818179	0.818179	0.818179	0.818179	0.818179	0.818179	0.818179	0.818179	0.818179	0.818179	0.818179	0.818179	0.818179	0.818179	0.818179	0.818179	0.818179	0.818179	0.818179	0.818179	0.818179	0.818179
22	fret	0.890108	0.807613	1.01066	0.990718	0.964433	0.957915	0.939777	0.82578	0.961823	0.903991	0.961823	0.887594	0.963128	0.878822	0.572226	0.811233	0.965739	0.961823	0.812441	0.876322	0.998671	0.82578	0.561632	0.986754	0.896407	0.990718	0.862633	0.885084	0.910334	1.00532	0.873826	0.817281	0.868843	0.445121	0.406006	0.425453	0.354574	0.444132	0.921804	0.906526	0.841663	0.933339	0.919249	0.973594	0.895145	0.74944	0.910334	0.892625
22	states	0.895145	0.895145	0.895145	0.895145	0.895145	0.895145	0.895145	0.895145	0.895145	0.895145	0.895145	0.895145	0.895145	0.895145	0.406974	0.895145	0.895145	0.895145	0.895145	0.895145	0.895145	0.895145	0.406974	0.895145	0.895145	0.895145	0.895145	0.895145	0.895145	0.895145	0.895145	0.895145	0.895145	0.406974	0.406974	0.406974	0.406974	0.406974	0.895145	0.895145	0.895145	0.895145	0.895145	0.895145	0.895145	0.895145	0.895145	0.895145
22	clusters	0.818179	0.818179	0.818179	0.818179	0.818179	0.818179	0.818179	0.818179	0.818179	0.818179	0.818179	0.818179	0.818179	0.818179	0.399993	0.818179	0.818179	0.818179	0.818179	0.818179	0.818179	0.818179	0.399993	0.818179	0.818179	0.818179	0.818179	0.818179	0.818179	0.818179	0.818179	0.818179	0.818179	0.399993	0.399993	0.399993	0.399993	0.399993	0.818179	0.818179	0.818179	0.818179	0.818179	0.818179	0.818179	0.818179	0.818179	0.818179
23	fret	0.995399	1.00461	0.951963	1.02077	1.01036	1.00461	1.02888	1.01498	1.01153	0.487861	0.321582	0.353249	0.487861	0.527136	0.549484	0.491869	0.467887	0.420403	0.392022	0.844404	0.966767	0.995399	0.94515	0.948555	0.927041	0.933822	0.965626	0.89332	0.966767	0.990803	0.916893	0.948555	0.9293	0.927041	0.934953	0.934953	0.855466	0.918019	0.975905	0.956512	0.951963	0.891083	0.942881	0.989655	0.954236	0.925912	0.94969	0.901161
23	states	0.934953	0.934953	0.934953	0.934953	0.934953	0.934953	0.934953	0.934953	0.934953	0.455956	0.455956	0.455956	0.455956	0.455956	0.455956	0.455956	0.455956	0.455956	0.455956	0.934953	0.934953	0.934953	0.934953	0.934953	0.934953	0.934953	0.934953	0.934953	0.934953	0.934953	0.934953	0.934953	0.934953	0.934953	0.934953	0.934953	0.934953	0.934953	0.934953	0.934953	0.934953	0.934953	0.934953	0.934953	0.934953	0.934953	0.934953	0.934953
23	clusters	0.818179	0.818179	0.818179	0.818179	0.818179	0.818179	0.818179	0.818179	0.818179	0.399993	0.399993	0.399993	0.399993	0.399993	0.399993	0.399993	0.399993	0.399993	0.399993	0.818179	0.818179	0.818179	0.818179	0.818179	0.818179	0.818179	0.818179	0.818179	0.818179	0.818179	0.818179	0.818179	0.818179	0.818179	0.818179	0.818179	0.818179	0.818179	0.818179	0.818179	0.818179	0.818179	0.818179	0.818179	0.818179	0.818179	0.818179	0.818179
24	fret	0.499907	0.761334	0.939098	0.952905	0.398256	0.773321	0.613222	1.09601	0.883832	0.929974	0.911916	0.786778	0.426456	0.575289	0.846375	0.785426	0.971542	0.793563	0.905953	0.962191	0.876542	0.984115	1.02738	0.799018	0.883832	0.987277	1.00154	0.844956	0.55846	0.329618	0.594672	0.977814	0.883832	0.763988	0.844956	0.980961	0.710723	0.826656	0.875089	0.816913	0.664615	0.636841	0.839297	0.750778	0.82526	0.842123	0.800385	0.954448
24	states	0.425963	0.902981	0.902981	0.902981	0.425963	0.654273	0.654273	0.902981	0.902981	0.902981	0.902981	0.902981	0.425963	0.654273	0.902981	0.902981	0.902981	0.902981	0.902981	0.902981	0.902981	0.902981	0.902981	0.902981	0.902981	0.902981	0.902981	0.902981	0.654273	0.425963	0.654273	0.902981	0.902981	0.902981	0.902981	0.902981	0.654273	0.902981	0.902981	0.902981	0.654273	0.654273	0.902981	0.902981	0.902981	0.902981	0.902981	0.902981
24	clusters	0.399993	0.818179	0.818179	0.818179	0.399993	0.818179	0.818179	0.818179	0.818179	0.818179	0.818179	0.818179	0.399993	0.818179	0.818179	0.818179	0.818179	0.818179	0.818179	0.818179	0.818179	0.818179	0.818179	0.818179	0.818179	0.818179	0.818179	0.818179	0.818179	0.399993	0.818179	0.818179	0.818179	0.818179	0.818179	0.818179	0.818179	0.818179	0.818179	0.818179	0.818179	0.818179	0.818179	0.818179	0.818179	0.818179	0.818179	0.818179
[truncated: 1,125 more columns]

## Sheet: 242-417_intra_liposome
1	fret	0.39699	0.425488	0.380998	0.354087	0.405472	0.341054	0.411813	0.460857	0.431771	0.419187	0.350836	0.409701	0.391672	0.335609	0.405472	0.376714	0.468068	0.444284	0.579322	0.693384	0.938769
1	states	0.405472	0.405472	0.405472	0.405472	0.405472	0.405472	0.405472	0.405472	0.405472	0.405472	0.405472	0.405472	0.405472	0.405472	0.405472	0.405472	0.405472	0.405472	0.693384	0.693384	0.693384
1	clusters	0.365735	0.365735	0.365735	0.365735	0.365735	0.365735	0.365735	0.365735	0.365735	0.365735	0.365735	0.365735	0.365735	0.365735	0.365735	0.365735	0.365735	0.365735	0.822287	0.822287	0.822287
2	fret	0.371951	0.330264	0.360277	0.316779	0.392457	0.284203	0.311012	0.202899	0.326407	0.289934	0.22261	0.299502	0.334125	0.357364	0.257561	0.285158	0.263253	0.304294	0.281341	0.232971	0.315817	0.305253	0.292802	0.462514	0.875036	0.904587	0.840258	0.832685	0.905685	0.879402	0.89362	1.04506	0.731148	0.29089	0.250927	0.378776	0.241467	0.249033	0.36903	0.238633	0.295672	0.337023	0.318699	0.268008	0.297587	0.313894	0.311973	0.413061
2	states	0.317741	0.317741	0.317741	0.317741	0.317741	0.317741	0.317741	0.317741	0.317741	0.317741	0.317741	0.317741	0.317741	0.317741	0.317741	0.317741	0.317741	0.317741	0.317741	0.317741	0.317741	0.317741	0.317741	0.317741	0.896907	0.896907	0.896907	0.896907	0.896907	0.896907	0.896907	0.896907	0.896907	0.317741	0.317741	0.317741	0.317741	0.317741	0.317741	0.317741	0.317741	0.317741	0.317741	0.317741	0.317741	0.317741	0.317741	0.317741
2	clusters	0.365735	0.365735	0.365735	0.365735	0.365735	0.365735	0.365735	0.365735	0.365735	0.365735	0.365735	0.365735	0.365735	0.365735	0.365735	0.365735	0.365735	0.365735	0.365735	0.365735	0.365735	0.365735	0.365735	0.365735	0.822287	0.822287	0.822287	0.822287	0.822287	0.822287	0.822287	0.822287	0.822287	0.365735	0.365735	0.365735	0.365735	0.365735	0.365735	0.365735	0.365735	0.365735	0.365735	0.365735	0.365735	0.365735	0.365735	0.365735
3	fret	0.45152	0.459742	0.399529	0.456671	0.474066	0.472024	0.427735	0.484248	0.467937	0.440172	0.427735	0.485264	0.45152	0.476106	0.407919	0.507513	0.456671	0.453578	0.484248	0.4474	0.516559	0.433961	0.416281	0.474066	0.479162	0.475086	0.450491	0.493377	0.700232	0.90627	0.943549	0.660793	0.472024	0.424616	0.418368	0.504491	0.442239	0.789832	0.491351	0.478144	0.454607	0.423576	0.467937	0.467937	0.493377	0.398479
3	states	0.459742	0.459742	0.459742	0.459742	0.459742	0.459742	0.459742	0.459742	0.459742	0.459742	0.459742	0.459742	0.459742	0.459742	0.459742	0.459742	0.459742	0.459742	0.459742	0.459742	0.459742	0.459742	0.459742	0.459742	0.459742	0.459742	0.459742	0.459742	0.789832	0.789832	0.789832	0.789832	0.459742	0.459742	0.459742	0.459742	0.459742	0.789832	0.459742	0.459742	0.459742	0.459742	0.459742	0.459742	0.459742	0.459742
3	clusters	0.365735	0.365735	0.365735	0.365735	0.365735	0.365735	0.365735	0.365735	0.365735	0.365735	0.365735	0.365735	0.365735	0.365735	0.365735	0.365735	0.365735	0.365735	0.365735	0.365735	0.365735	0.365735	0.365735	0.365735	0.365735	0.365735	0.365735	0.365735	0.822287	0.822287	0.822287	0.822287	0.365735	0.365735	0.365735	0.365735	0.365735	0.822287	0.365735	0.365735	0.365735	0.365735	0.365735	0.365735	0.365735	0.365735
4	fret	0.846135	0.918427	0.913356	0.873249	0.851038	0.79777	0.920967	0.831501
4	states	0.851038	0.851038	0.913356	0.851038	0.851038	0.851038	0.851038	0.851038
4	clusters	0.822287	0.822287	0.822287	0.822287	0.822287	0.822287	0.822287	0.822287
5	fret	0.195264	0.227691	0.116556	0.238687	0.0675143	0.225167	0.519775	0.262699	0.968771	0.681417	0.269633	0.483571	0.699076	0.32748	0.447321	0.272247	0.30941	0.156475	0.0899002	0.183012	0.318414	0.412953	0.451305	0.826208	0.817229	0.841722	0.691988	0.195264	0.394653	0.15409
5	states	0.262699	0.262699	0.262699	0.262699	0.262699	0.262699	0.262699	0.262699	0.817229	0.817229	0.262699	0.262699	0.817229	0.262699	0.262699	0.262699	0.262699	0.262699	0.262699	0.262699	0.262699	0.262699	0.262699	0.817229	0.817229	0.817229	0.817229	0.262699	0.262699	0.262699
5	clusters	0.365735	0.365735	0.365735	0.365735	0.365735	0.365735	0.365735	0.365735	0.822287	0.822287	0.365735	0.365735	0.822287	0.365735	0.365735	0.365735	0.365735	0.365735	0.365735	0.365735	0.365735	0.365735	0.365735	0.822287	0.822287	0.822287	0.822287	0.365735	0.365735	0.365735
6	fret	0.418585	0.332537	0.293592	0.352891	0.67662	0.322482	0.272301	0.32157	0.245264	0.290022	0.292699	0.348242	0.300761	0.300761	0.359424	0.310676	0.447085	0.549672	0.318839	0.35662	0.339912	0.275819	0.704427	0.384897	0.5391	0.754253	0.673177	0.691623	0.33899	0.290914	0.319749	0.27847	0.312486	0.264398	0.28735	0.362232	0.449071	0.274937	0.75905	0.530695	0.445102	0.805619	0.493425	0.303458	0.245264	0.32522	0.327964	0.307062
6	states	0.307062	0.307062	0.307062	0.307062	0.67662	0.307062	0.307062	0.307062	0.307062	0.307062	0.307062	0.307062	0.307062	0.307062	0.307062	0.307062	0.67662	0.67662	0.307062	0.307062	0.307062	0.307062	0.67662	0.307062	0.67662	0.67662	0.67662	0.67662	0.307062	0.307062	0.307062	0.307062	0.307062	0.307062	0.307062	0.307062	0.67662	0.307062	0.67662	0.67662	0.67662	0.67662	0.67662	0.307062	0.307062	0.307062	0.307062	0.307062
6	clusters	0.365735	0.365735	0.365735	0.365735	0.822287	0.365735	0.365735	0.365735	0.365735	0.365735	0.365735	0.365735	0.365735	0.365735	0.365735	0.365735	0.822287	0.822287	0.365735	0.365735	0.365735	0.365735	0.822287	0.365735	0.822287	0.822287	0.822287	0.822287	0.365735	0.365735	0.365735	0.365735	0.365735	0.365735	0.365735	0.365735	0.822287	0.365735	0.822287	0.822287	0.822287	0.822287	0.822287	0.365735	0.365735	0.365735	0.365735	0.365735
7	fret	0.361997	0.383767	0.456299	0.42246	0.429419	0.448328	0.392685	0.523271	0.443349	0.314641	0.324491	0.348165	0.402602	0.313657	0.336321	0.395659	0.340268	0.377826	0.416499	0.308735	0.33928	0.396649	0.376836	0.252781	0.283178	0.356067	0.362986	0.437377	0.408556	0.364964	0.416499	0.319565	0.373867	0.357055	0.608794	0.905375	0.953113	0.966639	0.904339	0.865052	0.928182	0.944797	0.96768	0.928182	0.899162	1.01149	0.681728	0.415506
7	states	0.386739	0.386739	0.386739	0.386739	0.386739	0.386739	0.386739	0.386739	0.386739	0.386739	0.386739	0.386739	0.386739	0.386739	0.386739	0.386739	0.386739	0.386739	0.386739	0.386739	0.386739	0.386739	0.386739	0.386739	0.386739	0.386739	0.386739	0.386739	0.386739	0.386739	0.386739	0.386739	0.386739	0.386739	0.63002	0.928182	0.928182	0.928182	0.928182	0.928182	0.928182	0.928182	0.928182	0.928182	0.928182	0.928182	0.63002	0.386739
7	clusters	0.365735	0.365735	0.365735	0.365735	0.365735	0.365735	0.365735	0.365735	0.365735	0.365735	0.365735	0.365735	0.365735	0.365735	0.365735	0.365735	0.365735	0.365735	0.365735	0.365735	0.365735	0.365735	0.365735	0.365735	0.365735	0.365735	0.365735	0.365735	0.365735	0.365735	0.365735	0.365735	0.365735	0.365735	0.822287	0.822287	0.822287	0.822287	0.822287	0.822287	0.822287	0.822287	0.822287	0.822287	0.822287	0.822287	0.822287	0.365735
8	fret	0.38992	0.334245	0.417196	0.357149	0.328548	0.3938	0.427001	0.32097	0.470549	0.374451	0.462582	0.439799	0.391859	0.811857	0.859246	0.867216	0.534076	0.417196	0.425037	0.448692	0.474541	0.358108	0.3938	0.360025	0.381208	0.401577	0.39283	0.414261	0.440785	0.469552	0.403525	0.380242	0.387013	0.365781	0.375415	0.396714	0.326652	0.759688	0.807382	0.892401	0.882073	0.862659	0.834331	0.849029	0.812977	0.879783	0.4329	0.486551
8	states	0.389435	0.389435	0.389435	0.389435	0.389435	0.389435	0.389435	0.389435	0.389435	0.389435	0.389435	0.389435	0.389435	0.854137	0.854137	0.854137	0.389435	0.389435	0.389435	0.389435	0.389435	0.389435	0.389435	0.389435	0.389435	0.389435	0.389435	0.389435	0.389435	0.389435	0.389435	0.389435	0.389435	0.389435	0.389435	0.389435	0.389435	0.854137	0.854137	0.854137	0.854137	0.854137	0.854137	0.854137	0.854137	0.854137	0.389435	0.389435
8	clusters	0.365735	0.365735	0.365735	0.365735	0.365735	0.365735	0.365735	0.365735	0.365735	0.365735	0.365735	0.365735	0.365735	0.822287	0.822287	0.822287	0.365735	0.365735	0.365735	0.365735	0.365735	0.365735	0.365735	0.365735	0.365735	0.365735	0.365735	0.365735	0.365735	0.365735	0.365735	0.365735	0.365735	0.365735	0.365735	0.365735	0.365735	0.822287	0.822287	0.822287	0.822287	0.822287	0.822287	0.822287	0.822287	0.822287	0.365735	0.365735
9	fret	0.514375	0.493292	0.399427	0.420044
9	states	0.456668	0.456668	0.456668	0.456668
9	clusters	0.365735	0.365735	0.365735	0.365735
10	fret	0.335611	0.292507	0.394807	0.411464	0.325031	0.403617	0.34043	0.299181	0.349119	0.335611	0.351052	0.325031	0.39383	0.419326	0.44004	0.385042	0.345255	0.330798	0.418343	0.351052	0.39383	0.337538	0.319268	0.380168	0.32215	0.389921	0.29346	0.494806	0.32311	0.304911	0.262141	0.314479	0.347186	0.32215	0.406557	0.370439	0.285844	0.650156	0.456888	0.42819	0.334648	0.383092	0.332723	0.448951	0.395785	0.314479	0.32407	0.313521
10	states	0.351052	0.351052	0.351052	0.351052	0.351052	0.351052	0.351052	0.351052	0.351052	0.351052	0.351052	0.351052	0.351052	0.351052	0.351052	0.351052	0.351052	0.351052	0.351052	0.351052	0.351052	0.351052	0.351052	0.351052	0.351052	0.351052	0.351052	0.351052	0.351052	0.351052	0.351052	0.351052	0.351052	0.351052	0.351052	0.351052	0.351052	0.351052	0.351052	0.351052	0.351052	0.351052	0.351052	0.351052	0.351052	0.351052	0.351052	0.351052
10	clusters	0.365735	0.365735	0.365735	0.365735	0.365735	0.365735	0.365735	0.365735	0.365735	0.365735	0.365735	0.365735	0.365735	0.365735	0.365735	0.365735	0.365735	0.365735	0.365735	0.365735	0.365735	0.365735	0.365735	0.365735	0.365735	0.365735	0.365735	0.365735	0.365735	0.365735	0.365735	0.365735	0.365735	0.365735	0.365735	0.365735	0.365735	0.365735	0.365735	0.365735	0.365735	0.365735	0.365735	0.365735	0.365735	0.365735	0.365735	0.365735
11	fret	0.704954	0.471827	0.319303	0.637806	0.455874	0.368574	0.42007	0.452885	0.352782	0.375491	0.455874	0.390329	0.499805	0.473823	0.439945	0.419077	0.445916	0.483808	0.455874	0.633751	0.653029	0.429009	0.374503	0.418085	0.341938	0.391319	0.364624	0.37648	0.450894	0.378457	0.357714	0.347851	0.616532	0.858164	0.366599	0.393299	0.393299	0.417092	0.44094	0.604396	0.385381	0.414115	0.350809	0.430003	0.468834	0.450894	0.354754	0.467836
11	states	0.636793	0.419077	0.419077	0.636793	0.419077	0.419077	0.419077	0.419077	0.419077	0.419077	0.419077	0.419077	0.419077	0.419077	0.419077	0.419077	0.419077	0.419077	0.419077	0.636793	0.636793	0.419077	0.419077	0.419077	0.419077	0.419077	0.419077	0.419077	0.419077	0.419077	0.419077	0.419077	0.636793	0.636793	0.419077	0.419077	0.419077	0.419077	0.419077	0.636793	0.419077	0.419077	0.419077	0.419077	0.419077	0.419077	0.419077	0.419077
11	clusters	0.822287	0.365735	0.365735	0.822287	0.365735	0.365735	0.365735	0.365735	0.365735	0.365735	0.365735	0.365735	0.365735	0.365735	0.365735	0.365735	0.365735	0.365735	0.365735	0.822287	0.822287	0.365735	0.365735	0.365735	0.365735	0.365735	0.365735	0.365735	0.365735	0.365735	0.365735	0.365735	0.822287	0.822287	0.365735	0.365735	0.365735	0.365735	0.365735	0.822287	0.365735	0.365735	0.365735	0.365735	0.365735	0.365735	0.365735	0.365735
12	fret	0.358099	0.480396	0.313532	0.417587	0.322893	0.322893	0.333274	0.343633	0.365317	0.371499	0.621287	1.01173	0.932695	1.09563	0.918014	0.990056	0.878331	0.88759	0.986435	0.923525	0.835507	0.88759	0.87555	1.02881	1.00452	0.932695	0.819582	1.00361	0.903288	0.919852	0.918933	1.00722	0.851379	0.910657	0.930862	0.911577	0.870911	0.99729	0.978277
12	states	0.350866	0.350866	0.350866	0.350866	0.350866	0.350866	0.350866	0.350866	0.350866	0.350866	0.621287	0.921688	0.921688	0.921688	0.921688	0.921688	0.921688	0.921688	0.921688	0.921688	0.921688	0.921688	0.921688	0.921688	0.921688	0.921688	0.921688	0.921688	0.921688	0.921688	0.921688	0.921688	0.921688	0.921688	0.921688	0.921688	0.921688	0.921688	0.921688
12	clusters	0.365735	0.365735	0.365735	0.365735	0.365735	0.365735	0.365735	0.365735	0.365735	0.365735	0.822287	0.822287	0.822287	0.822287	0.822287	0.822287	0.822287	0.822287	0.822287	0.822287	0.822287	0.822287	0.822287	0.822287	0.822287	0.822287	0.822287	0.822287	0.822287	0.822287	0.822287	0.822287	0.822287	0.822287	0.822287	0.822287	0.822287	0.822287	0.822287
13	fret	0.458256	0.433264	0.450258	0.447259	0.461256	0.443261	0.462255	0.494251	0.471254	0.42027	0.470254	0.415272	0.44526	0.429266	0.486252	0.407277
13	states	0.448759	0.448759	0.448759	0.448759	0.448759	0.448759	0.448759	0.448759	0.448759	0.448759	0.448759	0.448759	0.448759	0.448759	0.448759	0.448759
13	clusters	0.365735	0.365735	0.365735	0.365735	0.365735	0.365735	0.365735	0.365735	0.365735	0.365735	0.365735	0.365735	0.365735	0.365735	0.365735	0.365735
14	fret	0.300489	0.268267	0.316985	0.339887	0.245787	0.322459	0.219671	0.216244	0.281653	0.312598	0.22765	0.343141	0.239001	0.344224	0.208232	0.273854	0.282765	0.272737	0.294965	0.252553	0.262667	0.348554	0.342057	0.403055	0.2593	0.323552	0.377566	0.385029	0.310401	0.294965	0.262667	0.316985	0.349635	0.297176	0.358265	0.286099	0.336629	0.235602	0.363642	0.288318	0.345307	0.421989	0.370079	0.336629	0.342057	0.251427	0.313695	0.267148
14	states	0.318081	0.318081	0.318081	0.318081	0.318081	0.318081	0.318081	0.318081	0.318081	0.318081	0.318081	0.318081	0.318081	0.318081	0.318081	0.318081	0.318081	0.318081	0.318081	0.318081	0.318081	0.318081	0.318081	0.318081	0.318081	0.318081	0.318081	0.318081	0.318081	0.318081	0.318081	0.318081	0.318081	0.318081	0.318081	0.318081	0.318081	0.318081	0.318081	0.318081	0.318081	0.318081	0.318081	0.318081	0.318081	0.318081	0.318081	0.318081
14	clusters	0.365735	0.365735	0.365735	0.365735	0.365735	0.365735	0.365735	0.365735	0.365735	0.365735	0.365735	0.365735	0.365735	0.365735	0.365735	0.365735	0.365735	0.365735	0.365735	0.365735	0.365735	0.365735	0.365735	0.365735	0.365735	0.365735	0.365735	0.365735	0.365735	0.365735	0.365735	0.365735	0.365735	0.365735	0.365735	0.365735	0.365735	0.365735	0.365735	0.365735	0.365735	0.365735	0.365735	0.365735	0.365735	0.365735	0.365735	0.365735
15	fret	0.380811	0.371327	0.339494	0.496072	0.44484	0.324731	0.37986	0.382715	0.269683	0.321062	0.432028	0.44583	0.430065	0.475801	0.29381	0.501197	0.370382	0.402839	0.369437	0.471773	0.223385	0.453769	0.456756	0.275012	0.565892	0.338557	0.322895	0.176776	0.230285	0.406701	0.214804	0.397064	0.397064	0.392266	0.683637	0.951937	0.882056	1	0.817155	0.949302	0.8631	0.962513	0.951937	1.00132	0.933569	0.914086	0.934875	0.836883
15	states	0.358611	0.358611	0.358611	0.358611	0.358611	0.358611	0.358611	0.358611	0.358611	0.358611	0.358611	0.358611	0.358611	0.358611	0.358611	0.358611	0.358611	0.358611	0.358611	0.358611	0.358611	0.358611	0.358611	0.358611	0.358611	0.358611	0.358611	0.358611	0.358611	0.358611	0.358611	0.358611	0.358611	0.358611	0.894802	0.894802	0.894802	0.894802	0.894802	0.894802	0.894802	0.894802	0.894802	0.894802	0.894802	0.894802	0.894802	0.894802
15	clusters	0.365735	0.365735	0.365735	0.365735	0.365735	0.365735	0.365735	0.365735	0.365735	0.365735	0.365735	0.365735	0.365735	0.365735	0.365735	0.365735	0.365735	0.365735	0.365735	0.365735	0.365735	0.365735	0.365735	0.365735	0.365735	0.365735	0.365735	0.365735	0.365735	0.365735	0.365735	0.365735	0.365735	0.365735	0.822287	0.822287	0.822287	0.822287	0.822287	0.822287	0.822287	0.822287	0.822287	0.822287	0.822287	0.822287	0.822287	0.822287
16	fret	0.909327	0.867102	0.881568	0.715902	0.572867	0.259349	0.264894	0.240719	0.235394	0.207308	0.259349	0.72651	0.936011	0.828482	0.233127	0.197297	0.250721	0.276952	0.246092	0.234637	0.213108	0.188855	0.270491	0.246092	0.22787	0.273713	0.264099	0.230868	0.262511	0.252294	0.246092	0.250721	0.235394	0.260138	0.193764	0.213108	0.277765	0.253074	0.253855	0.257774	0.258561	0.180537	0.271295	0.202268	0.216764	0.266488	0.253855	0.2037
16	states	0.799793	0.799793	0.799793	0.799793	0.799793	0.246092	0.246092	0.246092	0.246092	0.246092	0.246092	0.799793	0.799793	0.799793	0.246092	0.246092	0.246092	0.246092	0.246092	0.246092	0.246092	0.246092	0.246092	0.246092	0.246092	0.246092	0.246092	0.246092	0.246092	0.246092	0.246092	0.246092	0.246092	0.246092	0.246092	0.246092	0.246092	0.246092	0.246092	0.246092	0.246092	0.246092	0.246092	0.246092	0.246092	0.246092	0.246092	0.246092
16	clusters	0.822287	0.822287	0.822287	0.822287	0.822287	0.365735	0.365735	0.365735	0.365735	0.365735	0.365735	0.822287	0.822287	0.822287	0.365735	0.365735	0.365735	0.365735	0.365735	0.365735	0.365735	0.365735	0.365735	0.365735	0.365735	0.365735	0.365735	0.365735	0.365735	0.365735	0.365735	0.365735	0.365735	0.365735	0.365735	0.365735	0.365735	0.365735	0.365735	0.365735	0.365735	0.365735	0.365735	0.365735	0.365735	0.365735	0.365735	0.365735
17	fret	0.887224	0.88389	0.434699	0.371097	0.513503	0.576539	0.817804	0.488384	0.375946	0.406187	0.548957	0.655277	0.36141	0.33346	0.379838	0.435686	0.372068	0.346926	0.356576	0.42189	0.367219	0.609492	0.785178	0.346926	0.405207	0.38373
17	states	0.632384	0.632384	0.374007	0.374007	0.632384	0.632384	0.632384	0.632384	0.374007	0.374007	0.632384	0.632384	0.374007	0.374007	0.374007	0.374007	0.374007	0.374007	0.374007	0.374007	0.374007	0.632384	0.632384	0.374007	0.374007	0.374007
17	clusters	0.822287	0.822287	0.365735	0.365735	0.822287	0.822287	0.822287	0.822287	0.365735	0.365735	0.822287	0.822287	0.365735	0.365735	0.365735	0.365735	0.365735	0.365735	0.365735	0.365735	0.365735	0.822287	0.822287	0.365735	0.365735	0.365735
18	fret	0.980586	1.01015	0.980586	0.921028	0.983363	0.981512	0.933174	0.977807	1.02579	0.990763	1.01659	0.957391	1.00922	0.980586	0.956461	0.954602	0.978733	0.96668	0.97688	1.01475	0.881621	0.94995	0.89948	0.962966	0.917286	0.930373	0.981512	0.983363	0.954602	0.930373	0.93504	0.944363	0.9741	0.927571	0.960179	1.01199	1.04322	1.01659	0.970391	0.957391	1.01107	0.990763	0.938771	0.97966	0.93504	0.901357	0.987989	0.956461
18	states	0.93224	0.93224	0.93224	0.93224	0.93224	0.93224	0.93224	0.93224	0.93224	0.93224	0.93224	0.93224	0.93224	0.93224	0.93224	0.93224	0.93224	0.93224	0.93224	0.93224	0.93224	0.93224	0.93224	0.93224	0.93224	0.93224	0.93224	0.93224	0.93224	0.93224	0.93224	0.93224	0.93224	0.93224	0.93224	0.93224	0.93224	0.93224	0.93224	0.93224	0.93224	0.93224	0.93224	0.93224	0.93224	0.93224	0.93224	0.93224
18	clusters	0.822287	0.822287	0.822287	0.822287	0.822287	0.822287	0.822287	0.822287	0.822287	0.822287	0.822287	0.822287	0.822287	0.822287	0.822287	0.822287	0.822287	0.822287	0.822287	0.822287	0.822287	0.822287	0.822287	0.822287	0.822287	0.822287	0.822287	0.822287	0.822287	0.822287	0.822287	0.822287	0.822287	0.822287	0.822287	0.822287	0.822287	0.822287	0.822287	0.822287	0.822287	0.822287	0.822287	0.822287	0.822287	0.822287	0.822287	0.822287
19	fret	0.422904	0.361929	0.49439	0.405978	0.47598	0.542682	0.526712	0.435516	0.374914	0.43761	0.440748	0.48725	0.546654	0.381377	0.345583	0.346677	0.374914	0.414453	0.302484	0.511625	0.395311	0.459476	0.43761	0.473924	0.366266	0.391034	0.400646	0.552599	0.553588	0.384601	0.389963	0.542682	0.282294	0.499474	0.984311	0.925043	0.942867	0.811708	0.384601	0.229818	0.233279	0.408092	0.354317	0.380301	0.375993	0.419739	0.510615	0.455329
19	states	0.423958	0.423958	0.423958	0.423958	0.423958	0.423958	0.423958	0.423958	0.423958	0.423958	0.423958	0.423958	0.423958	0.423958	0.423958	0.423958	0.423958	0.423958	0.423958	0.423958	0.423958	0.423958	0.423958	0.423958	0.423958	0.423958	0.423958	0.423958	0.423958	0.423958	0.423958	0.423958	0.423958	0.423958	0.992564	0.992564	0.992564	0.785558	0.423958	0.423958	0.423958	0.423958	0.423958	0.423958	0.423958	0.423958	0.423958	0.423958
19	clusters	0.365735	0.365735	0.365735	0.365735	0.365735	0.365735	0.365735	0.365735	0.365735	0.365735	0.365735	0.365735	0.365735	0.365735	0.365735	0.365735	0.365735	0.365735	0.365735	0.365735	0.365735	0.365735	0.365735	0.365735	0.365735	0.365735	0.365735	0.365735	0.365735	0.365735	0.365735	0.365735	0.365735	0.365735	0.822287	0.822287	0.822287	0.822287	0.365735	0.365735	0.365735	0.365735	0.365735	0.365735	0.365735	0.365735	0.365735	0.365735
20	fret	0.420654	0.409483	0.43889	0.391161	0.365626	0.400329	0.47017	0.417609	0.726432	0.957435	0.897702	0.957435	0.891132	0.922041	0.903328	0.915498	0.880794	0.846833	0.459089	0.380958	0.411516	0.414563	0.412532	0.451017	0.460097	0.442935	0.448997	0.364602	0.802203	0.889254	0.93697	0.63208	0.387082	0.433829	0.427755	0.420654	0.423697	0.56208	0.916433	0.884555	0.911756	0.89301	0.900516	0.916433	0.895826	0.922041	0.486253	0.431804
20	states	0.420654	0.420654	0.420654	0.420654	0.420654	0.420654	0.420654	0.420654	0.696437	0.904265	0.904265	0.904265	0.904265	0.904265	0.904265	0.904265	0.904265	0.904265	0.420654	0.420654	0.420654	0.420654	0.420654	0.420654	0.420654	0.420654	0.420654	0.420654	0.696437	0.904265	0.904265	0.696437	0.420654	0.420654	0.420654	0.420654	0.420654	0.696437	0.904265	0.904265	0.904265	0.904265	0.904265	0.904265	0.904265	0.904265	0.420654	0.420654
20	clusters	0.365735	0.365735	0.365735	0.365735	0.365735	0.365735	0.365735	0.365735	0.822287	0.822287	0.822287	0.822287	0.822287	0.822287	0.822287	0.822287	0.822287	0.822287	0.365735	0.365735	0.365735	0.365735	0.365735	0.365735	0.365735	0.365735	0.365735	0.365735	0.822287	0.822287	0.822287	0.822287	0.365735	0.365735	0.365735	0.365735	0.365735	0.822287	0.822287	0.822287	0.822287	0.822287	0.822287	0.822287	0.822287	0.822287	0.365735	0.365735
21	fret	0.253887	0.383999	0.401775	0.44639	0.362328	0.417609	0.400786	0.423555	0.384986	0.402763	0.450368	0.439433	0.692761	0.918403	0.899446	0.924732	0.884732	0.717409	0.40573	0.408698	0.422564	0.44142	0.395845	0.439433	0.436454	0.653889	0.897342	0.887882	0.895239	0.924732	0.754524	0.433475	0.395845	0.369217	0.409688	0.419591	0.390907	0.646749	0.917349	0.584795	0.394857	0.414638	0.409688	0.409688	0.715353	0.400786	0.410678	0.394857
21	states	0.874238	0.40573	0.40573	0.40573	0.40573	0.40573	0.40573	0.40573	0.40573	0.40573	0.40573	0.40573	0.874238	0.874238	0.874238	0.874238	0.874238	0.874238	0.40573	0.40573	0.40573	0.40573	0.40573	0.40573	0.40573	0.874238	0.874238	0.874238	0.874238	0.874238	0.874238	0.40573	0.40573	0.40573	0.40573	0.40573	0.40573	0.874238	0.874238	0.874238	0.40573	0.40573	0.40573	0.40573	0.874238	0.40573	0.40573	0.40573
21	clusters	0.822287	0.365735	0.365735	0.365735	0.365735	0.365735	0.365735	0.365735	0.365735	0.365735	0.365735	0.365735	0.822287	0.822287	0.822287	0.822287	0.822287	0.822287	0.365735	0.365735	0.365735	0.365735	0.365735	0.365735	0.365735	0.822287	0.822287	0.822287	0.822287	0.822287	0.822287	0.365735	0.365735	0.365735	0.365735	0.365735	0.365735	0.822287	0.822287	0.822287	0.365735	0.365735	0.365735	0.365735	0.822287	0.365735	0.365735	0.365735
22	fret	0.358487	0.656351	0.273569	0.321367	0.415605	0.39029	0.367118	0.367118	0.345104	0.28008	0.365197	0.314757	0.407792	0.610965	0.653161	0.360404	0.358487	0.401946	0.557	0.365197	0.341293	0.300646	0.406816	0.359446	0.362323	0.3537	0.371935	0.405842	0.283808	0.374825	0.439178	0.358487	0.80699	0.785777	0.313814	0.349877	0.335585	0.314757	0.815961	0.930405	0.873787	0.915281	0.921089	0.923416	0.781348	0.902542	0.915281	0.713308
22	states	0.3537	0.853251	0.3537	0.3537	0.3537	0.3537	0.3537	0.3537	0.3537	0.3537	0.3537	0.3537	0.3537	0.853251	0.853251	0.3537	0.3537	0.3537	0.853251	0.3537	0.3537	0.3537	0.3537	0.3537	0.3537	0.3537	0.3537	0.3537	0.3537	0.3537	0.3537	0.3537	0.853251	0.853251	0.3537	0.3537	0.3537	0.3537	0.853251	0.853251	0.853251	0.853251	0.853251	0.853251	0.853251	0.853251	0.853251	0.853251
22	clusters	0.365735	0.822287	0.365735	0.365735	0.365735	0.365735	0.365735	0.365735	0.365735	0.365735	0.365735	0.365735	0.365735	0.822287	0.822287	0.365735	0.365735	0.365735	0.822287	0.365735	0.365735	0.365735	0.365735	0.365735	0.365735	0.365735	0.365735	0.365735	0.365735	0.365735	0.365735	0.365735	0.822287	0.822287	0.365735	0.365735	0.365735	0.365735	0.822287	0.822287	0.822287	0.822287	0.822287	0.822287	0.822287	0.822287	0.822287	0.822287
23	fret	0.396869	0.367381	0.403606	0.396869	0.325545	0.277684	0.445627	0.389206	0.423012	0.330138	0.360798	0.385388	0.423988	0.390162	0.321881	0.347717	0.366439	0.371154	0.369266	0.369266	0.443647	0.334735	0.389206
23	states	0.371154	0.371154	0.371154	0.371154	0.371154	0.371154	0.371154	0.371154	0.371154	0.371154	0.371154	0.371154	0.371154	0.371154	0.371154	0.371154	0.371154	0.371154	0.371154	0.371154	0.371154	0.371154	0.371154
23	clusters	0.365735	0.365735	0.365735	0.365735	0.365735	0.365735	0.365735	0.365735	0.365735	0.365735	0.365735	0.365735	0.365735	0.365735	0.365735	0.365735	0.365735	0.365735	0.365735	0.365735	0.365735	0.365735	0.365735
24	fret	0.366061	0.387699	0.342533	0.19538	0.343511	0.2734	0.298635	0.299608	0.384744	0.327867	0.40743	0.321036	0.328843	0.350366	0.333731	0.361152	0.357228	0.22802	0.847906	0.929399	0.97746	0.99785	0.913451	1.03664	0.942184	1.04421	1.02369	1.01614	0.85633	0.929399	1.00645	0.986039	0.958197	0.979604	1.00215	1.02369	0.974246	1.01398	1.04746	0.993553	0.984966	0.965682	0.994627	0.957129	0.947518	0.969963	0.951788	0.984966
24	states	0.32494	0.32494	0.32494	0.32494	0.32494	0.32494	0.32494	0.32494	0.32494	0.32494	0.32494	0.32494	0.32494	0.32494	0.32494	0.32494	0.32494	0.32494	0.979604	0.979604	0.979604	0.979604	0.979604	0.979604	0.979604	0.979604	0.979604	0.979604	0.979604	0.979604	0.979604	0.979604	0.979604	0.979604	0.979604	0.979604	0.979604	0.979604	0.979604	0.979604	0.979604	0.979604	0.979604	0.979604	0.979604	0.979604	0.979604	0.979604
24	clusters	0.365735	0.365735	0.365735	0.365735	0.365735	0.365735	0.365735	0.365735	0.365735	0.365735	0.365735	0.365735	0.365735	0.365735	0.365735	0.365735	0.365735	0.365735	0.822287	0.822287	0.822287	0.822287	0.822287	0.822287	0.822287	0.822287	0.822287	0.822287	0.822287	0.822287	0.822287	0.822287	0.822287	0.822287	0.822287	0.822287	0.822287	0.822287	0.822287	0.822287	0.822287	0.822287	0.822287	0.822287	0.822287	0.822287	0.822287	0.822287
25	fret	0.733711	0.725103	0.791273	0.901441	0.825408	0.790178	0.837596
25	states	0.791273	0.791273	0.791273	0.791273	0.791273	0.791273	0.791273
25	clusters	0.822287	0.822287	0.822287	0.822287	0.822287	0.822287	0.822287
26	fret	0.313296	0.500357	0.406078	0.470324	0.587152	0.380915	0.383937	0.466316	0.401048	0.400042	0.349662	0.396017	0.416133	0.496355	0.384944	0.355717	0.445257	0.431203	0.441243	0.424171	0.567238	0.432207	0.528339	0.447264	0.535328	0.395011	0.467318	0.273812	0.409095	0.319363	0.448267	0.151749	0.477337	0.407083	0.309251	0.325427	0.40306	0.334519	0.419147	0.534329	0.388971	0.418142	0.444253	0.515353	0.379908	0.40306	0.345625	0.4101
26	states	0.418142	0.418142	0.418142	0.418142	0.418142	0.418142	0.418142	0.418142	0.418142	0.418142	0.418142	0.418142	0.418142	0.418142	0.418142	0.418142	0.418142	0.418142	0.418142	0.418142	0.418142	0.418142	0.418142	0.418142	0.418142	0.418142	0.418142	0.418142	0.418142	0.418142	0.418142	0.418142	0.418142	0.418142	0.418142	0.418142	0.418142	0.418142	0.418142	0.418142	0.418142	0.418142	0.418142	0.418142	0.418142	0.418142	0.418142	0.418142
26	clusters	0.365735	0.365735	0.365735	0.365735	0.365735	0.365735	0.365735	0.365735	0.365735	0.365735	0.365735	0.365735	0.365735	0.365735	0.365735	0.365735	0.365735	0.365735	0.365735	0.365735	0.365735	0.365735	0.365735	0.365735	0.365735	0.365735	0.365735	0.365735	0.365735	0.365735	0.365735	0.365735	0.365735	0.365735	0.365735	0.365735	0.365735	0.365735	0.365735	0.365735	0.365735	0.365735	0.365735	0.365735	0.365735	0.365735	0.365735	0.365735
27	fret	0.874896	0.849598	0.873741	0.865671	0.896925	0.903917	0.379026	0.351227	0.33412	0.27327	0.285325	0.3771	0.27142	0.317125	0.296504	0.318066	0.376137	0.308669	0.318066	0.347415	0.306788	0.403231	0.29184	0.364603	0.520557	0.91678	0.815458	0.845022	0.79517	0.329388	0.456285	0.327497	0.323721	0.313363	0.387714	0.221979	0.363645	0.380954	0.33128	0.344561	0.381919	0.303978	0.371328	0.316184	0.323721	0.292772	0.318066	0.354089
27	states	0.869706	0.869706	0.869706	0.869706	0.869706	0.869706	0.323721	0.323721	0.323721	0.323721	0.323721	0.323721	0.323721	0.323721	0.323721	0.323721	0.323721	0.323721	0.323721	0.323721	0.323721	0.323721	0.323721	0.323721	0.323721	0.869706	0.869706	0.869706	0.869706	0.323721	0.323721	0.323721	0.323721	0.323721	0.323721	0.323721	0.323721	0.323721	0.323721	0.323721	0.323721	0.323721	0.323721	0.323721	0.323721	0.323721	0.323721	0.323721
27	clusters	0.822287	0.822287	0.822287	0.822287	0.822287	0.822287	0.365735	0.365735	0.365735	0.365735	0.365735	0.365735	0.365735	0.365735	0.365735	0.365735	0.365735	0.365735	0.365735	0.365735	0.365735	0.365735	0.365735	0.365735	0.365735	0.822287	0.822287	0.822287	0.822287	0.365735	0.365735	0.365735	0.365735	0.365735	0.365735	0.365735	0.365735	0.365735	0.365735	0.365735	0.365735	0.365735	0.365735	0.365735	0.365735	0.365735	0.365735	0.365735
[truncated: 594 more columns]

## Sheet: 242-431_inter_liposome
1	fret	0.171454	0.215264	0.411251	0.494297	0.59954	0.395902	0.517332	0.561091	0.420436	0.583804	0.571967	0.59954	0.523323	0.62988	0.55812	0.638652	0.521327	0.552173	0.534287	0.55911	0.521327	0.586759	0.464081	0.553165	0.590701	0.638652	0.573942	0.62988	0.595618	0.512334	0.586759	0.636704	0.542245	0.518331	0.4953	0.657116	0.546218	0.622069	0.616203	0.541251	0.540256	0.616203	0.504326	0.594635	0.717829	0.59954	0.584789	0.614245
1	states	0.223767	0.223767	0.581833	0.581833	0.581833	0.581833	0.581833	0.581833	0.581833	0.581833	0.581833	0.581833	0.581833	0.581833	0.581833	0.581833	0.581833	0.581833	0.581833	0.581833	0.581833	0.581833	0.581833	0.581833	0.581833	0.581833	0.581833	0.581833	0.581833	0.581833	0.581833	0.581833	0.581833	0.581833	0.581833	0.581833	0.581833	0.581833	0.581833	0.581833	0.581833	0.581833	0.581833	0.581833	0.581833	0.581833	0.581833	0.581833
1	clusters	0.382257	0.382257	0.691259	0.691259	0.691259	0.691259	0.691259	0.691259	0.691259	0.691259	0.691259	0.691259	0.691259	0.691259	0.691259	0.691259	0.691259	0.691259	0.691259	0.691259	0.691259	0.691259	0.691259	0.691259	0.691259	0.691259	0.691259	0.691259	0.691259	0.691259	0.691259	0.691259	0.691259	0.691259	0.691259	0.691259	0.691259	0.691259	0.691259	0.691259	0.691259	0.691259	0.691259	0.691259	0.691259	0.691259	0.691259	0.691259
2	fret	0.226888	0.321733	0.305692	0.324572	0.335959	0.266474	0.316063	0.361751	0.447495	0.293497	0.360791	0.309457	0.297245	0.257217	0.337861	0.374254	0.427778	0.282283	0.324572	0.325519	0.268329	0.287884	0.240632	0.30006	0.307574	0.316063	0.311346	0.307574	0.358873	0.555358	0.589456	0.478329	0.251673	0.296308	0.308515	0.292561	0.312289	0.337861	0.449474	0.313232	0.298183	0.335008	0.453437	0.324572	0.288819	0.357915	0.306633	0.358873
2	states	0.299122	0.299122	0.299122	0.299122	0.299122	0.299122	0.299122	0.299122	0.463369	0.299122	0.299122	0.299122	0.299122	0.299122	0.299122	0.299122	0.463369	0.299122	0.299122	0.299122	0.299122	0.299122	0.299122	0.299122	0.299122	0.299122	0.299122	0.299122	0.299122	0.463369	0.463369	0.463369	0.299122	0.299122	0.299122	0.299122	0.299122	0.299122	0.463369	0.299122	0.299122	0.299122	0.463369	0.299122	0.299122	0.299122	0.299122	0.299122
2	clusters	0.382257	0.382257	0.382257	0.382257	0.382257	0.382257	0.382257	0.382257	0.382257	0.382257	0.382257	0.382257	0.382257	0.382257	0.382257	0.382257	0.382257	0.382257	0.382257	0.382257	0.382257	0.382257	0.382257	0.382257	0.382257	0.382257	0.382257	0.382257	0.382257	0.382257	0.382257	0.382257	0.382257	0.382257	0.382257	0.382257	0.382257	0.382257	0.382257	0.382257	0.382257	0.382257	0.382257	0.382257	0.382257	0.382257	0.382257	0.382257
3	fret	0.827355	0.847075	0.843644	0.887524	0.852181	0.856406	0.893353	0.796981	0.831655	0.865711	1.01096	0.717526	0.876649	0.830796	0.804837	0.788214	0.860641	0.903305	1.00314	0.851331	0.720257	0.722985	0.74379	0.816129	0.664894	0.889191	0.865711	0.758997	0.626172	0.880839	0.894185	0.695535	0.838515	0.770559	0.882512	0.751848	0.635675	0.825632	0.887524	0.855558	0.784696	0.858949	0.787335	0.606024	0.691846	0.839371	0.834231	0.775873
3	states	0.835946	0.835946	0.835946	0.835946	0.835946	0.835946	0.835946	0.835946	0.835946	0.835946	0.835946	0.716614	0.835946	0.835946	0.835946	0.835946	0.835946	0.835946	0.835946	0.835946	0.716614	0.716614	0.716614	0.835946	0.716614	0.835946	0.835946	0.716614	0.716614	0.835946	0.835946	0.716614	0.835946	0.835946	0.835946	0.716614	0.716614	0.835946	0.835946	0.835946	0.835946	0.835946	0.835946	0.716614	0.716614	0.835946	0.835946	0.835946
3	clusters	0.691259	0.691259	0.691259	0.691259	0.691259	0.691259	0.691259	0.691259	0.691259	0.691259	0.691259	0.691259	0.691259	0.691259	0.691259	0.691259	0.691259	0.691259	0.691259	0.691259	0.691259	0.691259	0.691259	0.691259	0.691259	0.691259	0.691259	0.691259	0.691259	0.691259	0.691259	0.691259	0.691259	0.691259	0.691259	0.691259	0.691259	0.691259	0.691259	0.691259	0.691259	0.691259	0.691259	0.691259	0.691259	0.691259	0.691259	0.691259
4	fret	0.649517	0.745494	0.701669	0.76118	0.730662	0.743642	0.662882	0.63705	0.732522	0.704487	0.706364	0.424824	0.54825	0.627424	0.678081	0.711987	0.718533	0.723211	0.714794	0.700729	0.623564	0.684705	0.669541	0.666689	0.669541	0.660976	0.698849	0.679028	0.625495	0.721334	0.655252	0.733439	0.68565	0.735297	0.719467	0.760259	0.722267	0.730662	0.708239	0.696026	0.689428	0.706364	0.692257	0.622598	0.472984	0.318646	0.322917	0.229621
4	states	0.704487	0.704487	0.704487	0.704487	0.704487	0.704487	0.704487	0.704487	0.704487	0.704487	0.704487	0.340496	0.340496	0.704487	0.704487	0.704487	0.704487	0.704487	0.704487	0.704487	0.704487	0.704487	0.704487	0.704487	0.704487	0.704487	0.704487	0.704487	0.704487	0.704487	0.704487	0.704487	0.704487	0.704487	0.704487	0.704487	0.704487	0.704487	0.704487	0.704487	0.704487	0.704487	0.704487	0.704487	0.340496	0.340496	0.340496	0.340496
4	clusters	0.691259	0.691259	0.691259	0.691259	0.691259	0.691259	0.691259	0.691259	0.691259	0.691259	0.691259	0.382257	0.382257	0.691259	0.691259	0.691259	0.691259	0.691259	0.691259	0.691259	0.691259	0.691259	0.691259	0.691259	0.691259	0.691259	0.691259	0.691259	0.691259	0.691259	0.691259	0.691259	0.691259	0.691259	0.691259	0.691259	0.691259	0.691259	0.691259	0.691259	0.691259	0.691259	0.691259	0.691259	0.382257	0.382257	0.382257	0.382257
5	fret	0.427514	0.456125	0.685548	0.627906	0.429565	0.648191	0.571253	0.61237	0.643372	0.591873	0.505643	0.327633	0.491566	0.516664	0.262693	0.312837	0.349722	0.534624	0.69696	0.682688	0.425461	0.646264	0.699808	0.630811	0.640477	0.592851	0.477432	0.304347	0.502631	0.655887	0.628874	0.624998	0.72815	0.595786	0.613343	0.604584	0.676963	0.583051	0.495594	0.695061
5	states	0.442845	0.442845	0.635644	0.635644	0.442845	0.635644	0.635644	0.635644	0.635644	0.635644	0.442845	0.442845	0.442845	0.442845	0.442845	0.442845	0.442845	0.442845	0.635644	0.635644	0.442845	0.635644	0.635644	0.635644	0.635644	0.635644	0.442845	0.442845	0.442845	0.635644	0.635644	0.635644	0.635644	0.635644	0.635644	0.635644	0.635644	0.635644	0.442845	0.635644
5	clusters	0.382257	0.382257	0.691259	0.691259	0.382257	0.691259	0.691259	0.691259	0.691259	0.691259	0.382257	0.382257	0.382257	0.382257	0.382257	0.382257	0.382257	0.382257	0.691259	0.691259	0.382257	0.691259	0.691259	0.691259	0.691259	0.691259	0.382257	0.382257	0.382257	0.691259	0.691259	0.691259	0.691259	0.691259	0.691259	0.691259	0.691259	0.691259	0.382257	0.691259
6	fret	0.72562	0.78277	0.796686	0.724676	0.639591	0.786486	0.656959	0.735986	0.72562	0.768798	0.648285	0.783699	0.740692	0.751961	0.727499	0.664651	0.609484	0.756646	0.458196	0.335322	0.724676	0.734102	0.770664	0.636688	0.727499	0.702871	0.623111	0.444967	0.377077	0.675202	0.56435	0.719949	0.733159	0.785557	0.442927	0.42862	0.787415	0.710467
6	states	0.724676	0.724676	0.724676	0.724676	0.724676	0.724676	0.724676	0.724676	0.724676	0.724676	0.724676	0.724676	0.724676	0.724676	0.724676	0.724676	0.724676	0.724676	0.458196	0.724676	0.724676	0.724676	0.724676	0.724676	0.724676	0.724676	0.724676	0.724676	0.724676	0.724676	0.724676	0.724676	0.724676	0.724676	0.724676	0.724676	0.724676	0.724676
6	clusters	0.691259	0.691259	0.691259	0.691259	0.691259	0.691259	0.691259	0.691259	0.691259	0.691259	0.691259	0.691259	0.691259	0.691259	0.691259	0.691259	0.691259	0.691259	0.382257	0.691259	0.691259	0.691259	0.691259	0.691259	0.691259	0.691259	0.691259	0.691259	0.691259	0.691259	0.691259	0.691259	0.691259	0.691259	0.691259	0.691259	0.691259	0.691259
7	fret	0.763952	0.74889	0.745115	0.801358	0.793905	0.736609	0.757369	0.760192	0.626277	0.762073	0.708121	0.749833	0.7724	0.757369	0.731875	0.757369	0.572411	0.675586	0.624331	0.275943	0.511813	0.774274	0.753603	0.712883	0.821779	0.682306	0.714795	0.695713	0.745115	0.780829	0.70049	0.696668	0.606773	0.31078	0.384742	0.309728	0.314978	0.290756	0.631138	0.746059	0.685183	0.731875	0.710027	0.711931	0.82733	0.737555	0.763012	0.791107
7	states	0.725713	0.725713	0.725713	0.725713	0.725713	0.725713	0.725713	0.725713	0.725713	0.725713	0.725713	0.725713	0.725713	0.725713	0.725713	0.725713	0.725713	0.725713	0.725713	0.370779	0.370779	0.725713	0.725713	0.725713	0.725713	0.725713	0.725713	0.725713	0.725713	0.725713	0.725713	0.725713	0.370779	0.370779	0.370779	0.370779	0.370779	0.370779	0.725713	0.725713	0.725713	0.725713	0.725713	0.725713	0.725713	0.725713	0.725713	0.725713
7	clusters	0.691259	0.691259	0.691259	0.691259	0.691259	0.691259	0.691259	0.691259	0.691259	0.691259	0.691259	0.691259	0.691259	0.691259	0.691259	0.691259	0.691259	0.691259	0.691259	0.382257	0.382257	0.691259	0.691259	0.691259	0.691259	0.691259	0.691259	0.691259	0.691259	0.691259	0.691259	0.691259	0.382257	0.382257	0.382257	0.382257	0.382257	0.382257	0.691259	0.691259	0.691259	0.691259	0.691259	0.691259	0.691259	0.691259	0.691259	0.691259
8	fret	0.736758	0.708601	0.714253	0.673526	0.66111	0.76374	0.74236	0.757248	0.69916	0.810634	0.719905	0.73956	0.72366	0.709544	0.779449	0.745156	0.73956	0.614844	0.434177	0.62357	0.72366	0.758176	0.681143	0.484082	0.361552	0.317211	0.500214	0.781292	0.731147	0.77299	0.696322	0.758176	0.760959	0.684944	0.72366	0.733954	0.693481	0.760032	0.749813	0.720844	0.686844	0.688741	0.747951	0.656322	0.762813	0.695375	0.784975	0.674479
8	states	0.733954	0.733954	0.733954	0.733954	0.733954	0.733954	0.733954	0.733954	0.733954	0.733954	0.733954	0.733954	0.733954	0.733954	0.733954	0.733954	0.733954	0.434177	0.434177	0.434177	0.733954	0.733954	0.733954	0.434177	0.434177	0.434177	0.434177	0.733954	0.733954	0.733954	0.733954	0.733954	0.733954	0.733954	0.733954	0.733954	0.733954	0.733954	0.733954	0.733954	0.733954	0.733954	0.733954	0.733954	0.733954	0.733954	0.733954	0.733954
8	clusters	0.691259	0.691259	0.691259	0.691259	0.691259	0.691259	0.691259	0.691259	0.691259	0.691259	0.691259	0.691259	0.691259	0.691259	0.691259	0.691259	0.691259	0.382257	0.382257	0.382257	0.691259	0.691259	0.691259	0.382257	0.382257	0.382257	0.382257	0.691259	0.691259	0.691259	0.691259	0.691259	0.691259	0.691259	0.691259	0.691259	0.691259	0.691259	0.691259	0.691259	0.691259	0.691259	0.691259	0.691259	0.691259	0.691259	0.691259	0.691259
9	fret	0.350302	0.325861	0.617485	0.606831	0.456382	0.677822	0.658804	0.774742	0.726704	0.74712	0.645416	0.707056	0.710807	0.667378	0.738781	0.52108	0.755435	0.774742	0.708932	0.719228	0.305523	0.654985	0.643498	0.767402	0.736924	0.727636	0.755435	0.691062	0.714553	0.692005	0.74249	0.692005	0.722029	0.584396	0.511063	0.67213	0.767402	0.708932	0.685395	0.514072	0.707056	0.604888	0.588308	0.605859	0.755435	0.807537	0.651161	0.718293
9	states	0.299072	0.299072	0.553897	0.692948	0.553897	0.692948	0.692948	0.692948	0.692948	0.692948	0.692948	0.692948	0.692948	0.692948	0.692948	0.553897	0.692948	0.692948	0.692948	0.692948	0.299072	0.553897	0.692948	0.692948	0.692948	0.692948	0.692948	0.692948	0.692948	0.692948	0.692948	0.692948	0.692948	0.553897	0.553897	0.692948	0.692948	0.692948	0.692948	0.553897	0.692948	0.553897	0.553897	0.553897	0.692948	0.692948	0.692948	0.692948
9	clusters	0.382257	0.382257	0.691259	0.691259	0.691259	0.691259	0.691259	0.691259	0.691259	0.691259	0.691259	0.691259	0.691259	0.691259	0.691259	0.691259	0.691259	0.691259	0.691259	0.691259	0.382257	0.691259	0.691259	0.691259	0.691259	0.691259	0.691259	0.691259	0.691259	0.691259	0.691259	0.691259	0.691259	0.691259	0.691259	0.691259	0.691259	0.691259	0.691259	0.691259	0.691259	0.691259	0.691259	0.691259	0.691259	0.691259	0.691259	0.691259
10	fret	0.742948	0.777193	0.804281	0.647294	0.401189	0.392304	0.807414	0.475637	0.827291	0.792812	0.517668
10	states	0.798547	0.798547	0.798547	0.475637	0.475637	0.475637	0.798547	0.475637	0.798547	0.798547	0.475637
10	clusters	0.691259	0.691259	0.691259	0.382257	0.382257	0.382257	0.691259	0.382257	0.691259	0.691259	0.382257
11	fret	0.62113	0.69791	0.709866	0.702891	0.685951	0.721819	0.727795	0.724807	0.693924	0.703888	0.704884	0.721819	0.715843
11	states	0.704884	0.704884	0.704884	0.704884	0.704884	0.704884	0.704884	0.704884	0.704884	0.704884	0.704884	0.704884	0.704884
11	clusters	0.691259	0.691259	0.691259	0.691259	0.691259	0.691259	0.691259	0.691259	0.691259	0.691259	0.691259	0.691259	0.691259
12	fret	0.75793	0.760842	0.732651	0.719008	0.718033	0.686761	0.764723	0.715106	0.734599	0.721934	0.541602	0.319626	0.306327	0.305303	0.524654	0.722908	0.777324	0.737519	0.721934	0.722908	0.726807	0.735572	0.758901	0.66225	0.308374	0.302231	0.318603	0.310421	0.715106	0.698502	0.74141	0.737519	0.693612	0.7073	0.734599	0.737519	0.754046	0.732651	0.719008	0.74141	0.732651	0.7073	0.712178	0.702416	0.722908	0.743355	0.708277	0.661268
12	states	0.721934	0.721934	0.721934	0.721934	0.721934	0.721934	0.721934	0.721934	0.721934	0.721934	0.379722	0.379722	0.379722	0.379722	0.379722	0.721934	0.721934	0.721934	0.721934	0.721934	0.721934	0.721934	0.721934	0.721934	0.379722	0.379722	0.379722	0.379722	0.721934	0.721934	0.721934	0.721934	0.721934	0.721934	0.721934	0.721934	0.721934	0.721934	0.721934	0.721934	0.721934	0.721934	0.721934	0.721934	0.721934	0.721934	0.721934	0.721934
12	clusters	0.691259	0.691259	0.691259	0.691259	0.691259	0.691259	0.691259	0.691259	0.691259	0.691259	0.382257	0.382257	0.382257	0.382257	0.382257	0.691259	0.691259	0.691259	0.691259	0.691259	0.691259	0.691259	0.691259	0.691259	0.382257	0.382257	0.382257	0.382257	0.691259	0.691259	0.691259	0.691259	0.691259	0.691259	0.691259	0.691259	0.691259	0.691259	0.691259	0.691259	0.691259	0.691259	0.691259	0.691259	0.691259	0.691259	0.691259	0.691259
13	fret	0.314401	0.694797	0.698532	0.676034	0.642856	0.72637	0.679798	0.602452	0.57221	0.705986	0.718977	0.659974	0.663762	0.690119	0.664708	0.681678	0.630419	0.696665	0.710634	0.760276	0.673208	0.632336	0.299188	0.294825	0.259666	0.240799	0.260771	0.170857	0.239685	0.689183	0.706917	0.660922	0.679798	0.720828	0.689183	0.725447	0.612143	0.764822	0.677917	0.667545	0.703194	0.705986	0.660922	0.730993	0.673208	0.698532	0.675092	0.668489
13	states	0.270702	0.72637	0.72637	0.72637	0.72637	0.72637	0.72637	0.72637	0.72637	0.72637	0.72637	0.72637	0.72637	0.72637	0.72637	0.72637	0.72637	0.72637	0.72637	0.72637	0.72637	0.72637	0.270702	0.270702	0.270702	0.270702	0.270702	0.270702	0.270702	0.72637	0.72637	0.72637	0.72637	0.72637	0.72637	0.72637	0.72637	0.72637	0.72637	0.72637	0.72637	0.72637	0.72637	0.72637	0.72637	0.72637	0.72637	0.72637
13	clusters	0.382257	0.691259	0.691259	0.691259	0.691259	0.691259	0.691259	0.691259	0.691259	0.691259	0.691259	0.691259	0.691259	0.691259	0.691259	0.691259	0.691259	0.691259	0.691259	0.691259	0.691259	0.691259	0.382257	0.382257	0.382257	0.382257	0.382257	0.382257	0.382257	0.691259	0.691259	0.691259	0.691259	0.691259	0.691259	0.691259	0.691259	0.691259	0.691259	0.691259	0.691259	0.691259	0.691259	0.691259	0.691259	0.691259	0.691259	0.691259
14	fret	0.737316	0.746377	0.723226	0.712158	0.651852	0.690033	0.581621	0.492525	0.436577	0.601673	0.722219	0.741343	0.604682	0.713164	0.705117	0.769544	0.686012	0.743357	0.704112	0.732283	0.747384	0.661896	0.718195	0.689028	0.696067	0.755441	0.724232	0.746377	0.64181	0.486526	0.468537	0.316982	0.259321	0.359791	0.245416	0.498524	0.727251	0.716183	0.701095	0.632775	0.508526	0.621736	0.738323	0.687017	0.675962	0.747384	0.732283	0.69506
14	states	0.716183	0.716183	0.716183	0.716183	0.716183	0.716183	0.51853	0.51853	0.51853	0.51853	0.716183	0.716183	0.716183	0.716183	0.716183	0.716183	0.716183	0.716183	0.716183	0.716183	0.716183	0.716183	0.716183	0.716183	0.716183	0.716183	0.716183	0.716183	0.716183	0.51853	0.51853	0.316485	0.316485	0.316485	0.316485	0.51853	0.716183	0.716183	0.716183	0.716183	0.51853	0.716183	0.716183	0.716183	0.716183	0.716183	0.716183	0.716183
14	clusters	0.691259	0.691259	0.691259	0.691259	0.691259	0.691259	0.382257	0.382257	0.382257	0.382257	0.691259	0.691259	0.691259	0.691259	0.691259	0.691259	0.691259	0.691259	0.691259	0.691259	0.691259	0.691259	0.691259	0.691259	0.691259	0.691259	0.691259	0.691259	0.691259	0.382257	0.382257	0.382257	0.382257	0.382257	0.382257	0.382257	0.691259	0.691259	0.691259	0.691259	0.382257	0.691259	0.691259	0.691259	0.691259	0.691259	0.691259	0.691259
15	fret	0.279002	0.271504	0.220754	0.233779	0.220754	0.295017	0.18469	0.293951	0.29182	0.313085	0.284348	0.282211	0.257538	0.313085	0.251074	0.673394	0.720857	0.321549	0.251074	0.21749	0.235946	0.300339	0.657108	0.244598	0.28862	0.31096	0.28328	0.255385	0.268286	0.279002	0.258615	0.249996	0.492862	0.659028	0.193468	0.244598	0.240274	0.243518	0.272577	0.201127	0.235946	0.35313	0.57252	0.479743	0.731198	0.338427	0.242437	0.398946
15	states	0.264528	0.264528	0.264528	0.264528	0.264528	0.264528	0.264528	0.264528	0.264528	0.264528	0.264528	0.264528	0.264528	0.264528	0.264528	0.562663	0.562663	0.264528	0.264528	0.264528	0.264528	0.264528	0.562663	0.264528	0.264528	0.264528	0.264528	0.264528	0.264528	0.264528	0.264528	0.264528	0.562663	0.562663	0.264528	0.264528	0.264528	0.264528	0.264528	0.264528	0.264528	0.264528	0.562663	0.562663	0.562663	0.264528	0.264528	0.264528
15	clusters	0.382257	0.382257	0.382257	0.382257	0.382257	0.382257	0.382257	0.382257	0.382257	0.382257	0.382257	0.382257	0.382257	0.382257	0.382257	0.691259	0.691259	0.382257	0.382257	0.382257	0.382257	0.382257	0.691259	0.382257	0.382257	0.382257	0.382257	0.382257	0.382257	0.382257	0.382257	0.382257	0.691259	0.691259	0.382257	0.382257	0.382257	0.382257	0.382257	0.382257	0.382257	0.382257	0.691259	0.691259	0.691259	0.382257	0.382257	0.382257
16	fret	0.554657	0.47769	0.738873	0.680594	0.709356	0.724616	0.534797	0.743614	0.714139	0.731275	0.727471	0.600978	0.725568	0.779476	0.742666	0.664208	0.700748	0.80944	0.610761	0.72652	0.648729	0.665174	0.60489	0.685401	0.751189	0.695958	0.591165	0.432069	0.761583	0.769126	0.64388	0.710311	0.656476	0.648729
16	states	0.534797	0.534797	0.710311	0.710311	0.710311	0.710311	0.534797	0.710311	0.710311	0.710311	0.710311	0.710311	0.710311	0.710311	0.710311	0.710311	0.710311	0.710311	0.710311	0.710311	0.710311	0.710311	0.710311	0.710311	0.710311	0.710311	0.534797	0.534797	0.710311	0.710311	0.710311	0.710311	0.710311	0.710311
16	clusters	0.382257	0.382257	0.691259	0.691259	0.691259	0.691259	0.382257	0.691259	0.691259	0.691259	0.691259	0.691259	0.691259	0.691259	0.691259	0.691259	0.691259	0.691259	0.691259	0.691259	0.691259	0.691259	0.691259	0.691259	0.691259	0.691259	0.382257	0.382257	0.691259	0.691259	0.691259	0.691259	0.691259	0.691259
17	fret	0.63057	0.693119	0.791596	0.757971	0.728044	0.692146	0.729979	0.671685	0.766634	0.71352	0.716423	0.734814	0.723205	0.402838	0.661919	0.741576	0.71255	0.741576	0.71158	0.60499	0.563459	0.724173	0.721268	0.799257	0.689227	0.703816	0.726109	0.442345	0.673636	0.695064	0.348775	0.639402	0.482625	0.602032	0.395722	0.416033	0.6902	0.728044	0.739645	0.678512	0.19339	0.607947	0.736747	0.678512	0.724173	0.586239	0.592163	0.703816
17	states	0.520669	0.723205	0.723205	0.723205	0.723205	0.723205	0.723205	0.723205	0.723205	0.723205	0.723205	0.723205	0.723205	0.520669	0.723205	0.723205	0.723205	0.723205	0.723205	0.520669	0.520669	0.723205	0.723205	0.723205	0.723205	0.723205	0.723205	0.520669	0.723205	0.723205	0.520669	0.520669	0.520669	0.520669	0.520669	0.520669	0.723205	0.723205	0.723205	0.723205	0.520669	0.520669	0.723205	0.723205	0.723205	0.520669	0.520669	0.723205
17	clusters	0.382257	0.691259	0.691259	0.691259	0.691259	0.691259	0.691259	0.691259	0.691259	0.691259	0.691259	0.691259	0.691259	0.382257	0.691259	0.691259	0.691259	0.691259	0.691259	0.382257	0.382257	0.691259	0.691259	0.691259	0.691259	0.691259	0.691259	0.382257	0.691259	0.691259	0.382257	0.382257	0.382257	0.382257	0.382257	0.382257	0.691259	0.691259	0.691259	0.691259	0.382257	0.382257	0.691259	0.691259	0.691259	0.382257	0.382257	0.691259
18	fret	0.762575	0.694533	0.710711	0.762575	0.745681	0.74474	0.760701	0.685939
18	states	0.745211	0.745211	0.745211	0.745211	0.745211	0.745211	0.745211	0.745211
18	clusters	0.691259	0.691259	0.691259	0.691259	0.691259	0.691259	0.691259	0.691259
19	fret	0.456152	0.446243	0.40707	0.299326	0.274619	0.498283	0.59358	0.559953	0.564128	0.615933	0.698787	0.679983	0.59782	0.60526	0.448221	0.586179	0.668995	0.449211	0.394495	0.435397	0.630964	0.531982	0.586179	0.303935
19	states	0.586179	0.394495	0.394495	0.394495	0.394495	0.586179	0.586179	0.586179	0.586179	0.586179	0.586179	0.674489	0.586179	0.586179	0.586179	0.586179	0.674489	0.586179	0.394495	0.394495	0.586179	0.586179	0.586179	0.394495
19	clusters	0.691259	0.382257	0.382257	0.382257	0.382257	0.691259	0.691259	0.691259	0.691259	0.691259	0.691259	0.691259	0.691259	0.691259	0.691259	0.691259	0.691259	0.691259	0.382257	0.382257	0.691259	0.691259	0.691259	0.382257
20	fret	0.357381	0.309284	0.431476	0.667337	0.759102	0.584462	0.587459	0.670331	0.696275	0.697272	0.64438	0.72919	0.669333	0.691286	0.796975	0.687295	0.647375	0.677317	0.684302	0.741156	0.735173	0.663345	0.646377	0.660351	0.757108	0.744147	0.713232	0.65037	0.700265	0.608435	0.696275	0.732182	0.695277	0.740159	0.741156	0.740159	0.735173	0.806939	0.775051	0.701262	0.69827	0.715227	0.721212	0.641385	0.684302	0.71024	0.744147	0.71423
20	states	0.301265	0.301265	0.432476	0.71024	0.71024	0.592454	0.592454	0.71024	0.71024	0.71024	0.71024	0.71024	0.71024	0.71024	0.71024	0.71024	0.71024	0.71024	0.71024	0.71024	0.71024	0.71024	0.71024	0.71024	0.71024	0.71024	0.71024	0.71024	0.71024	0.592454	0.71024	0.71024	0.71024	0.71024	0.71024	0.71024	0.71024	0.71024	0.71024	0.71024	0.71024	0.71024	0.71024	0.71024	0.71024	0.71024	0.71024	0.71024
20	clusters	0.382257	0.382257	0.382257	0.691259	0.691259	0.691259	0.691259	0.691259	0.691259	0.691259	0.691259	0.691259	0.691259	0.691259	0.691259	0.691259	0.691259	0.691259	0.691259	0.691259	0.691259	0.691259	0.691259	0.691259	0.691259	0.691259	0.691259	0.691259	0.691259	0.691259	0.691259	0.691259	0.691259	0.691259	0.691259	0.691259	0.691259	0.691259	0.691259	0.691259	0.691259	0.691259	0.691259	0.691259	0.691259	0.691259	0.691259	0.691259
21	fret	0.758283	0.797295	0.743938	0.777349	0.79445	0.711285	0.697772	0.793502	0.736271	0.745853	0.620911	0.779252	0.795399	0.750637	0.781154	0.552867	0.668714	0.787807	0.823773	0.755417	0.675508	0.744895	0.752549	0.5608	0.676478	0.745853	0.732434	0.652178	0.437524	0.694873	0.435496
21	states	0.745853	0.745853	0.745853	0.745853	0.745853	0.745853	0.745853	0.745853	0.745853	0.745853	0.556833	0.745853	0.556833	0.745853	0.745853	0.556833	0.745853	0.745853	0.745853	0.745853	0.745853	0.745853	0.745853	0.556833	0.745853	0.745853	0.745853	0.745853	0.556833	0.745853	0.556833
21	clusters	0.691259	0.691259	0.691259	0.691259	0.691259	0.691259	0.691259	0.691259	0.691259	0.691259	0.691259	0.691259	0.691259	0.691259	0.691259	0.691259	0.691259	0.691259	0.691259	0.691259	0.691259	0.691259	0.691259	0.691259	0.691259	0.691259	0.691259	0.691259	0.691259	0.691259	0.691259
22	fret	0.671445	0.754057	0.546742	0.321408	0.257107	0.356534	0.442727	0.653509	0.695349	0.787855	0.745106	0.765989	0.726205	0.770959	0.842473	0.728195	0.80673	0.733169	0.722224	0.775929	0.826591	0.726205	0.759029	0.764994	0.802757	0.69734	0.747096	0.286255	0.300319	0.182645	0.498765	0.540748	0.305341	0.686386	0.651516	0.576702	0.396644	0.668456	0.528757	0.746101	0.640551	0.760023	0.68041	0.773941	0.752068	0.755051	0.621605	0.633572
22	states	0.742122	0.742122	0.396644	0.396644	0.396644	0.396644	0.396644	0.742122	0.742122	0.742122	0.742122	0.742122	0.742122	0.742122	0.742122	0.742122	0.742122	0.742122	0.742122	0.742122	0.742122	0.742122	0.742122	0.742122	0.742122	0.742122	0.742122	0.396644	0.396644	0.396644	0.396644	0.396644	0.396644	0.742122	0.742122	0.396644	0.396644	0.742122	0.396644	0.742122	0.742122	0.742122	0.742122	0.742122	0.742122	0.742122	0.742122	0.742122
22	clusters	0.691259	0.691259	0.382257	0.382257	0.382257	0.382257	0.382257	0.691259	0.691259	0.691259	0.691259	0.691259	0.691259	0.691259	0.691259	0.691259	0.691259	0.691259	0.691259	0.691259	0.691259	0.691259	0.691259	0.691259	0.691259	0.691259	0.691259	0.382257	0.382257	0.382257	0.382257	0.382257	0.382257	0.691259	0.691259	0.382257	0.382257	0.691259	0.382257	0.691259	0.691259	0.691259	0.691259	0.691259	0.691259	0.691259	0.691259	0.691259
23	fret	0.450704	0.349762	0.646571	0.639309	0.65905	0.604207	0.71038	0.785845	0.609351	0.594962	0.627921	0.61038	0.625854	0.747418	0.685163	0.293975	0.591885	0.717762	0.666338	0.618626	0.706167	0.78263	0.655927	0.698804	0.632059	0.316969	0.209806	0.763389	0.669468	0.257828	0.285386	0.728331	0.817046	0.319848	0.726215	0.764455	0.844122	0.412198	0.469592	0.748481	0.751671	0.759124	0.693552	0.758059	0.694602	0.71038	0.672601	0.793356
23	states	0.276814	0.276814	0.71829	0.71829	0.71829	0.71829	0.71829	0.71829	0.71829	0.71829	0.71829	0.71829	0.71829	0.71829	0.71829	0.276814	0.71829	0.71829	0.71829	0.71829	0.71829	0.71829	0.71829	0.71829	0.71829	0.276814	0.276814	0.71829	0.71829	0.276814	0.276814	0.71829	0.71829	0.276814	0.71829	0.71829	0.71829	0.276814	0.276814	0.71829	0.71829	0.71829	0.71829	0.71829	0.71829	0.71829	0.71829	0.71829
23	clusters	0.382257	0.382257	0.691259	0.691259	0.691259	0.691259	0.691259	0.691259	0.691259	0.691259	0.691259	0.691259	0.691259	0.691259	0.691259	0.382257	0.691259	0.691259	0.691259	0.691259	0.691259	0.691259	0.691259	0.691259	0.691259	0.382257	0.382257	0.691259	0.691259	0.382257	0.382257	0.691259	0.691259	0.382257	0.691259	0.691259	0.691259	0.382257	0.382257	0.691259	0.691259	0.691259	0.691259	0.691259	0.691259	0.691259	0.691259	0.691259
24	fret	0.732175	0.782886	0.779905	0.72919	0.786861	0.683398	0.718244	0.775929	0.764	0.787855	0.620608	0.749085	0.896035	0.779905	0.740133	0.785867	0.741128	0.691366	0.52276	0.461748	0.474757	0.592673	0.75704	0.79779	0.754057	0.752068	0.813683	0.79481	0.916847	0.72521	0.669452	0.802757	0.878188	0.843466	0.741128	0.859342	0.79481	0.840489	0.74809	0.763006	0.624597	0.698336	0.734164	0.772947	0.655502	0.695349	0.816663	0.452739
24	states	0.740133	0.740133	0.740133	0.740133	0.740133	0.740133	0.740133	0.740133	0.740133	0.740133	0.740133	0.740133	0.740133	0.740133	0.740133	0.740133	0.740133	0.740133	0.455742	0.455742	0.455742	0.455742	0.740133	0.740133	0.740133	0.740133	0.740133	0.740133	0.740133	0.740133	0.740133	0.740133	0.740133	0.740133	0.740133	0.740133	0.740133	0.740133	0.740133	0.740133	0.740133	0.740133	0.740133	0.740133	0.740133	0.740133	0.740133	0.455742
24	clusters	0.691259	0.691259	0.691259	0.691259	0.691259	0.691259	0.691259	0.691259	0.691259	0.691259	0.691259	0.691259	0.691259	0.691259	0.691259	0.691259	0.691259	0.691259	0.382257	0.382257	0.382257	0.382257	0.691259	0.691259	0.691259	0.691259	0.691259	0.691259	0.691259	0.691259	0.691259	0.691259	0.691259	0.691259	0.691259	0.691259	0.691259	0.691259	0.691259	0.691259	0.691259	0.691259	0.691259	0.691259	0.691259	0.691259	0.691259	0.382257
25	fret	0.753546	0.677842	0.741145	0.570457	0.667676	0.641526	0.689778	0.632107	0.440372	0.519751	0.504558	0.715206	0.755287	0.7509	0.684279	0.667676	0.70798	0.686114	0.7125	0.728673	0.768437	0.717908	0.692521	0.500485	0.701631	0.754407	0.727778	0.726883	0.732246	0.732246	0.697993	0.635888	0.674152	0.737591	0.73848	0.598654	0.77975	0.719707	0.76669	0.713402
25	states	0.723295	0.723295	0.723295	0.584555	0.584555	0.584555	0.723295	0.584555	0.584555	0.584555	0.584555	0.723295	0.723295	0.723295	0.723295	0.723295	0.723295	0.723295	0.723295	0.723295	0.723295	0.723295	0.723295	0.584555	0.723295	0.723295	0.723295	0.723295	0.723295	0.723295	0.723295	0.584555	0.723295	0.723295	0.723295	0.584555	0.723295	0.723295	0.723295	0.723295
25	clusters	0.691259	0.691259	0.691259	0.691259	0.691259	0.691259	0.691259	0.691259	0.691259	0.691259	0.691259	0.691259	0.691259	0.691259	0.691259	0.691259	0.691259	0.691259	0.691259	0.691259	0.691259	0.691259	0.691259	0.691259	0.691259	0.691259	0.691259	0.691259	0.691259	0.691259	0.691259	0.691259	0.691259	0.691259	0.691259	0.691259	0.691259	0.691259	0.691259	0.691259
26	fret	0.721819	0.698907	0.693924	0.709866	0.698907	0.727795	0.730782	0.696914	0.709866	0.722815	0.720823	0.717835	0.689938	0.727795	0.698907	0.728791	0.731778	0.69791	0.693924	0.686947	0.707873	0.728791	0.699903	0.687944	0.696914	0.432217	0.698907	0.701895	0.49826	0.573214	0.665017	0.726799	0.429213	0.378124	0.400168	0.691931	0.704884	0.696914	0.71385	0.67698	0.669005	0.708869	0.715843	0.466249	0.587193	0.605162	0.314947	0.340026
26	states	0.706877	0.706877	0.706877	0.706877	0.706877	0.706877	0.706877	0.706877	0.706877	0.706877	0.706877	0.706877	0.706877	0.706877	0.706877	0.706877	0.706877	0.706877	0.706877	0.706877	0.706877	0.706877	0.706877	0.706877	0.706877	0.449233	0.706877	0.706877	0.449233	0.449233	0.449233	0.706877	0.449233	0.449233	0.449233	0.706877	0.706877	0.706877	0.706877	0.706877	0.706877	0.706877	0.706877	0.449233	0.449233	0.449233	0.449233	0.449233
26	clusters	0.691259	0.691259	0.691259	0.691259	0.691259	0.691259	0.691259	0.691259	0.691259	0.691259	0.691259	0.691259	0.691259	0.691259	0.691259	0.691259	0.691259	0.691259	0.691259	0.691259	0.691259	0.691259	0.691259	0.691259	0.691259	0.382257	0.691259	0.691259	0.382257	0.382257	0.382257	0.691259	0.382257	0.382257	0.382257	0.691259	0.691259	0.691259	0.691259	0.691259	0.691259	0.691259	0.691259	0.382257	0.382257	0.382257	0.382257	0.382257
27	fret	0.741207	0.704149	0.73634	0.678694	0.6571	0.730495	0.728546	0.728546	0.749961	0.681635	0.685554	0.681635	0.693387	0.737313	0.703172	0.752878	0.71977	0.71489	0.696322	0.709035	0.693387	0.231081	0.259932	0.291764	0.534364	0.717818	0.722696	0.710012	0.728546	0.768414	0.696322	0.763562	0.716842	0.678694	0.710012	0.729521	0.71977	0.69045	0.720745	0.636436	0.665941
27	states	0.712451	0.712451	0.712451	0.712451	0.712451	0.712451	0.712451	0.712451	0.712451	0.712451	0.712451	0.712451	0.712451	0.712451	0.712451	0.712451	0.712451	0.712451	0.712451	0.712451	0.712451	0.259932	0.259932	0.259932	0.712451	0.712451	0.712451	0.712451	0.712451	0.712451	0.712451	0.712451	0.712451	0.712451	0.712451	0.712451	0.712451	0.712451	0.712451	0.712451	0.712451
27	clusters	0.691259	0.691259	0.691259	0.691259	0.691259	0.691259	0.691259	0.691259	0.691259	0.691259	0.691259	0.691259	0.691259	0.691259	0.691259	0.691259	0.691259	0.691259	0.691259	0.691259	0.691259	0.382257	0.382257	0.382257	0.691259	0.691259	0.691259	0.691259	0.691259	0.691259	0.691259	0.691259	0.691259	0.691259	0.691259	0.691259	0.691259	0.691259	0.691259	0.691259	0.691259
28	fret	0.580485	0.69072	0.319294	0.334854	0.331746	0.556753	0.684928	0.442464	0.70132	0.712865	0.727243	0.703245	0.705169	0.732028	0.605085	0.77394	0.59821	0.299515	0.366867	0.348302	0.402761	0.652951	0.676228	0.670419	0.710944	0.665573	0.5864	0.729158	0.753029	0.715746	0.666542	0.68203	0.734897	0.723411	0.504944	0.735853	0.706131	0.753029	0.70132	0.709022	0.697468	0.7282	0.68203	0.564676	0.54981	0.722453	0.752076	0.697468
28	states	0.421633	0.723411	0.421633	0.421633	0.421633	0.421633	0.723411	0.421633	0.723411	0.723411	0.723411	0.723411	0.723411	0.723411	0.723411	0.723411	0.421633	0.421633	0.421633	0.421633	0.421633	0.723411	0.723411	0.723411	0.723411	0.723411	0.421633	0.723411	0.723411	0.723411	0.723411	0.723411	0.723411	0.723411	0.421633	0.723411	0.723411	0.723411	0.723411	0.723411	0.723411	0.723411	0.723411	0.421633	0.421633	0.723411	0.723411	0.723411
28	clusters	0.382257	0.691259	0.382257	0.382257	0.382257	0.382257	0.691259	0.382257	0.691259	0.691259	0.691259	0.691259	0.691259	0.691259	0.691259	0.691259	0.382257	0.382257	0.382257	0.382257	0.382257	0.691259	0.691259	0.691259	0.691259	0.691259	0.382257	0.691259	0.691259	0.691259	0.691259	0.691259	0.691259	0.691259	0.382257	0.691259	0.691259	0.691259	0.691259	0.691259	0.691259	0.691259	0.691259	0.382257	0.382257	0.691259	0.691259	0.691259
29	fret	0.561531	0.688806	0.68307	0.723991	0.682113	0.664848	0.676367	0.546679	0.365882	0.342936	0.679241	0.598904	0.661001	0.664848	0.75226	0.706911	0.747562	0.760701	0.711661	0.708812	0.723045	0.738148	0.727765	0.702155	0.353383	0.667731	0.763511	0.689761	0.72871	0.740033	0.737205	0.66581	0.75226	0.645571	0.724937	0.705009	0.71261	0.741917	0.692625	0.543702	0.723991	0.709762	0.704058	0.562519	0.503779	0.711661	0.707861	0.710711
29	states	0.429827	0.704058	0.704058	0.704058	0.704058	0.704058	0.704058	0.429827	0.429827	0.429827	0.704058	0.704058	0.704058	0.704058	0.704058	0.704058	0.704058	0.704058	0.704058	0.704058	0.704058	0.704058	0.704058	0.704058	0.429827	0.704058	0.704058	0.704058	0.704058	0.704058	0.704058	0.704058	0.704058	0.704058	0.704058	0.704058	0.704058	0.704058	0.704058	0.429827	0.704058	0.704058	0.704058	0.429827	0.429827	0.704058	0.704058	0.704058
29	clusters	0.382257	0.691259	0.691259	0.691259	0.691259	0.691259	0.691259	0.382257	0.382257	0.382257	0.691259	0.691259	0.691259	0.691259	0.691259	0.691259	0.691259	0.691259	0.691259	0.691259	0.691259	0.691259	0.691259	0.691259	0.382257	0.691259	0.691259	0.691259	0.691259	0.691259	0.691259	0.691259	0.691259	0.691259	0.691259	0.691259	0.691259	0.691259	0.691259	0.382257	0.691259	0.691259	0.691259	0.382257	0.382257	0.691259	0.691259	0.691259
30	fret	0.670465	0.726533	0.786329	0.657992	0.426668	0.272733	0.24267	0.279144	0.322655	0.572377	0.699081	0.738755	0.773334	0.766819	0.693377	0.794657	0.799275	0.658953	0.287674	0.262024	0.489695	0.770544	0.741572	0.294059	0.558564	0.679074	0.747198	0.77891	0.815848	0.829599	0.739694	0.713302	0.700981	0.776123	0.790033	0.719929	0.747198	0.715194	0.736876	0.692425	0.759357	0.772404	0.819521	0.777981	0.705725	0.699081	0.764955	0.732174
30	states	0.741572	0.741572	0.741572	0.741572	0.407621	0.407621	0.407621	0.407621	0.407621	0.407621	0.741572	0.741572	0.741572	0.741572	0.741572	0.741572	0.741572	0.741572	0.407621	0.407621	0.407621	0.741572	0.741572	0.407621	0.407621	0.741572	0.741572	0.741572	0.741572	0.741572	0.741572	0.741572	0.741572	0.741572	0.741572	0.741572	0.741572	0.741572	0.741572	0.741572	0.741572	0.741572	0.741572	0.741572	0.741572	0.741572	0.741572	0.741572
30	clusters	0.691259	0.691259	0.691259	0.691259	0.382257	0.382257	0.382257	0.382257	0.382257	0.382257	0.691259	0.691259	0.691259	0.691259	0.691259	0.691259	0.691259	0.691259	0.382257	0.382257	0.382257	0.691259	0.691259	0.382257	0.382257	0.691259	0.691259	0.691259	0.691259	0.691259	0.691259	0.691259	0.691259	0.691259	0.691259	0.691259	0.691259	0.691259	0.691259	0.691259	0.691259	0.691259	0.691259	0.691259	0.691259	0.691259	0.691259	0.691259
31	fret	0.607389	0.740741	0.748355	0.471149
31	states	0.674065	0.674065	0.674065	0.674065
31	clusters	0.691259	0.691259	0.691259	0.691259
32	fret	0.76273	0.757069	0.706721	0.705765	0.708632	0.730545	0.722936	0.723888	0.699069	0.737192	0.745722	0.740985	0.712459	0.752345	0.727694	0.706721	0.738141	0.732446	0.619817	0.758013	0.730545	0.757069	0.774971	0.704809	0.640256	0.687564	0.295678	0.25447	0.47797	0.726743	0.741933	0.741933	0.758957	0.596345	0.605158	0.340669	0.317708	0.428266	0.756124	0.744775	0.604179	0.316662	0.318754	0.310381	0.576672	0.743828
32	states	0.732446	0.732446	0.732446	0.732446	0.732446	0.732446	0.732446	0.732446	0.732446	0.732446	0.732446	0.732446	0.732446	0.732446	0.732446	0.732446	0.732446	0.732446	0.732446	0.732446	0.732446	0.732446	0.732446	0.732446	0.732446	0.732446	0.340669	0.340669	0.340669	0.732446	0.732446	0.732446	0.732446	0.340669	0.340669	0.340669	0.340669	0.340669	0.732446	0.732446	0.340669	0.340669	0.340669	0.340669	0.340669	0.732446
32	clusters	0.691259	0.691259	0.691259	0.691259	0.691259	0.691259	0.691259	0.691259	0.691259	0.691259	0.691259	0.691259	0.691259	0.691259	0.691259	0.691259	0.691259	0.691259	0.691259	0.691259	0.691259	0.691259	0.691259	0.691259	0.691259	0.691259	0.382257	0.382257	0.382257	0.691259	0.691259	0.691259	0.691259	0.382257	0.382257	0.382257	0.382257	0.382257	0.691259	0.691259	0.382257	0.382257	0.382257	0.382257	0.382257	0.691259
33	fret	0.681032	0.705735	0.719915	0.656147	0.793564	0.699102	0.745262	0.479743	0.764852	0.715188	0.75647	0.726507	0.744326	0.497894	0.703841	0.746197	0.749937	0.771357	0.569566	0.744326	0.614589	0.67435	0.586274	0.75647	0.750871	0.735893
33	states	0.723211	0.723211	0.723211	0.723211	0.723211	0.723211	0.723211	0.723211	0.723211	0.723211	0.723211	0.723211	0.723211	0.723211	0.723211	0.723211	0.723211	0.723211	0.723211	0.723211	0.723211	0.723211	0.723211	0.723211	0.723211	0.723211
33	clusters	0.691259	0.691259	0.691259	0.691259	0.691259	0.691259	0.691259	0.691259	0.691259	0.691259	0.691259	0.691259	0.691259	0.691259	0.691259	0.691259	0.691259	0.691259	0.691259	0.691259	0.691259	0.691259	0.691259	0.691259	0.691259	0.691259
34	fret	0.284864	0.374296	0.709912	0.826035	0.749655	0.753627	0.733763	0.76157	0.700965	0.790346	0.703947	0.790346	0.768518	0.807204	0.73277	0.767525	0.728796	0.800263	0.73277	0.750648	0.76157	0.79828	0.75462	0.78241	0.752634	0.635273	0.823063	0.797288	0.757599	0.734757	0.73575	0.785386	0.68505	0.511523	0.607367	0.762562	0.708918	0.629295	0.818109	0.624313	0.784394
34	states	0.44291	0.44291	0.75462	0.75462	0.75462	0.75462	0.75462	0.75462	0.75462	0.75462	0.75462	0.75462	0.75462	0.75462	0.75462	0.75462	0.75462	0.75462	0.75462	0.75462	0.75462	0.75462	0.75462	0.75462	0.75462	0.75462	0.75462	0.75462	0.75462	0.75462	0.75462	0.75462	0.75462	0.44291	0.44291	0.75462	0.75462	0.75462	0.75462	0.75462	0.75462
34	clusters	0.382257	0.382257	0.691259	0.691259	0.691259	0.691259	0.691259	0.691259	0.691259	0.691259	0.691259	0.691259	0.691259	0.691259	0.691259	0.691259	0.691259	0.691259	0.691259	0.691259	0.691259	0.691259	0.691259	0.691259	0.691259	0.691259	0.691259	0.691259	0.691259	0.691259	0.691259	0.691259	0.691259	0.382257	0.382257	0.691259	0.691259	0.691259	0.691259	0.691259	0.691259
35	fret	0.617975	0.629258	0.657054	0.564957	0.603649	0.647773	0.641594	0.59446	0.598542	0.607739	0.58325	0.623101	0.667379	0.607739	0.640565	0.596501	0.59242	0.607739	0.582232	0.647773	0.634395	0.629258	0.393263	0.616951	0.674623	0.648804	0.576128	0.616951	0.549755	0.538643	0.530573	0.678773	0.584268	0.626179	0.617975	0.727701	0.598542	0.614902	0.616951	0.59446	0.571047	0.615926	0.624127	0.627205	0.656022	0.619	0.628232	0.482407
35	states	0.625666	0.625666	0.625666	0.625666	0.625666	0.625666	0.625666	0.625666	0.625666	0.625666	0.625666	0.625666	0.625666	0.625666	0.625666	0.625666	0.625666	0.625666	0.625666	0.625666	0.625666	0.625666	0.320128	0.625666	0.625666	0.625666	0.625666	0.625666	0.625666	0.625666	0.625666	0.625666	0.625666	0.625666	0.625666	0.625666	0.625666	0.625666	0.625666	0.625666	0.625666	0.625666	0.625666	0.625666	0.625666	0.625666	0.625666	0.320128
35	clusters	0.691259	0.691259	0.691259	0.691259	0.691259	0.691259	0.691259	0.691259	0.691259	0.691259	0.691259	0.691259	0.691259	0.691259	0.691259	0.691259	0.691259	0.691259	0.691259	0.691259	0.691259	0.691259	0.382257	0.691259	0.691259	0.691259	0.691259	0.691259	0.691259	0.691259	0.691259	0.691259	0.691259	0.691259	0.691259	0.691259	0.691259	0.691259	0.691259	0.691259	0.691259	0.691259	0.691259	0.691259	0.691259	0.691259	0.691259	0.382257
36	fret	0.476991	0.742515	0.764072	0.775663	0.830919	0.747011	0.726168	0.478015	0.706032	0.762283	0.753313	0.729808	0.789839	0.764072	0.845591	0.817028	0.788073	0.766752	0.597496	0.313385	0.317789	0.328762	0.374274	0.28008	0.272239	0.319988	0.483127	0.756906	0.76943	0.69589	0.757803	0.737085	0.7587	0.78542	0.789839	0.685699	0.751515	0.69219	0.760492	0.760492	0.778329	0.747011	0.697738	0.738897	0.748814	0.800407	0.744321	0.747913
36	states	0.349464	0.74611	0.74611	0.74611	0.74611	0.74611	0.74611	0.349464	0.74611	0.74611	0.74611	0.74611	0.74611	0.74611	0.74611	0.74611	0.74611	0.74611	0.349464	0.349464	0.349464	0.349464	0.349464	0.349464	0.349464	0.349464	0.349464	0.74611	0.74611	0.74611	0.74611	0.74611	0.74611	0.74611	0.74611	0.74611	0.74611	0.74611	0.74611	0.74611	0.74611	0.74611	0.74611	0.74611	0.74611	0.74611	0.74611	0.74611
36	clusters	0.382257	0.691259	0.691259	0.691259	0.691259	0.691259	0.691259	0.382257	0.691259	0.691259	0.691259	0.691259	0.691259	0.691259	0.691259	0.691259	0.691259	0.691259	0.382257	0.382257	0.382257	0.382257	0.382257	0.382257	0.382257	0.382257	0.382257	0.691259	0.691259	0.691259	0.691259	0.691259	0.691259	0.691259	0.691259	0.691259	0.691259	0.691259	0.691259	0.691259	0.691259	0.691259	0.691259	0.691259	0.691259	0.691259	0.691259	0.691259
37	fret	0.738873	0.776562	0.754776	0.76264	0.755634	0.506217	0.412245	0.784341	0.799787	0.749499	0.566196	0.350062	0.50825	0.749499	0.579898
37	states	0.755634	0.755634	0.755634	0.755634	0.755634	0.537223	0.381154	0.755634	0.755634	0.755634	0.537223	0.381154	0.537223	0.755634	0.537223
37	clusters	0.691259	0.691259	0.691259	0.691259	0.691259	0.691259	0.382257	0.691259	0.691259	0.691259	0.691259	0.382257	0.691259	0.691259	0.691259
38	fret	0.729735	0.76408	0.732524	0.4828	0.73439	0.739979	0.748344	0.692136	0.765926	0.739048	0.772378	0.702519	0.740909	0.767771	0.727867	0.766849	0.679818	0.740909	0.743699	0.774219	0.728801	0.751127	0.724126	0.778816	0.784323	0.732524	0.714745	0.769615	0.776059	0.731591	0.74277	0.685509	0.291977	0.271498	0.290903	0.285524	0.758536	0.697804	0.74277	0.716621	0.781571	0.739048	0.715683	0.743699	0.776978	0.763157	0.748344	0.694026
38	states	0.739979	0.739979	0.739979	0.50041	0.739979	0.739979	0.739979	0.739979	0.739979	0.739979	0.739979	0.739979	0.739979	0.739979	0.739979	0.739979	0.739979	0.739979	0.739979	0.739979	0.739979	0.739979	0.739979	0.739979	0.739979	0.739979	0.739979	0.739979	0.739979	0.739979	0.739979	0.739979	0.285524	0.285524	0.285524	0.285524	0.739979	0.739979	0.739979	0.739979	0.739979	0.739979	0.739979	0.739979	0.739979	0.739979	0.739979	0.739979
38	clusters	0.691259	0.691259	0.691259	0.382257	0.691259	0.691259	0.691259	0.691259	0.691259	0.691259	0.691259	0.691259	0.691259	0.691259	0.691259	0.691259	0.691259	0.691259	0.691259	0.691259	0.691259	0.691259	0.691259	0.691259	0.691259	0.691259	0.691259	0.691259	0.691259	0.691259	0.691259	0.691259	0.382257	0.382257	0.382257	0.382257	0.691259	0.691259	0.691259	0.691259	0.691259	0.691259	0.691259	0.691259	0.691259	0.691259	0.691259	0.691259
39	fret	0.300491	0.375386	0.266195	0.324932	0.290879	0.197668	0.227202	0.318573	0.252164	0.339725	0.236991	0.265118	0.266195	0.278022	0.267272	0.272651	0.221751	0.208635	0.281241	0.236991	0.255407	0.20754	0.301557	0.22066	0.316455	0.205349	0.266195	0.192171	0.291949	0.344992	0.174523	0.28981	0.265118	0.300491	0.256488	0.282313	0.282313	0.20973	0.241333	0.275875	0.238077	0.234818	0.225023	0.24567	0.311139	0.211919	0.205349	0.22066
39	states	0.282313	0.282313	0.282313	0.282313	0.282313	0.282313	0.282313	0.282313	0.282313	0.282313	0.282313	0.282313	0.282313	0.282313	0.282313	0.282313	0.282313	0.282313	0.282313	0.282313	0.282313	0.282313	0.282313	0.282313	0.282313	0.282313	0.282313	0.282313	0.282313	0.282313	0.282313	0.282313	0.282313	0.282313	0.282313	0.282313	0.282313	0.282313	0.282313	0.282313	0.282313	0.282313	0.282313	0.282313	0.282313	0.282313	0.282313	0.282313
39	clusters	0.382257	0.382257	0.382257	0.382257	0.382257	0.382257	0.382257	0.382257	0.382257	0.382257	0.382257	0.382257	0.382257	0.382257	0.382257	0.382257	0.382257	0.382257	0.382257	0.382257	0.382257	0.382257	0.382257	0.382257	0.382257	0.382257	0.382257	0.382257	0.382257	0.382257	0.382257	0.382257	0.382257	0.382257	0.382257	0.382257	0.382257	0.382257	0.382257	0.382257	0.382257	0.382257	0.382257	0.382257	0.382257	0.382257	0.382257	0.382257
40	fret	0.673504	0.792153	0.64785	0.504726	0.53469	0.759915	0.403281	0.506726	0.670547	0.752086	0.782394	0.53469	0.67449	0.791178	0.810673	0.705004	0.683357	0.733472	0.39016	0.360836	0.361848	0.323315	0.471678	0.483706	0.658711	0.692216	0.756002	0.768716	0.74817	0.636979	0.756002	0.627087	0.697138	0.605296	0.752086	0.720718	0.427467	0.35172	0.333468	0.837912	0.792153	0.656737	0.71188	0.336512	0.550638	0.741313	0.758937	0.569549
40	states	0.689264	0.689264	0.689264	0.689264	0.689264	0.689264	0.401263	0.401263	0.689264	0.689264	0.689264	0.689264	0.689264	0.689264	0.689264	0.689264	0.689264	0.689264	0.401263	0.401263	0.401263	0.401263	0.401263	0.401263	0.689264	0.689264	0.689264	0.689264	0.689264	0.689264	0.689264	0.689264	0.689264	0.689264	0.689264	0.689264	0.401263	0.401263	0.401263	0.689264	0.689264	0.689264	0.689264	0.401263	0.401263	0.689264	0.689264	0.689264
40	clusters	0.691259	0.691259	0.691259	0.691259	0.691259	0.691259	0.382257	0.382257	0.691259	0.691259	0.691259	0.691259	0.691259	0.691259	0.691259	0.691259	0.691259	0.691259	0.382257	0.382257	0.382257	0.382257	0.382257	0.382257	0.691259	0.691259	0.691259	0.691259	0.691259	0.691259	0.691259	0.691259	0.691259	0.691259	0.691259	0.691259	0.382257	0.382257	0.382257	0.691259	0.691259	0.691259	0.691259	0.382257	0.382257	0.691259	0.691259	0.691259
41	fret	0.773035	0.680073	0.774048	0.416464	0.67604	0.634744	0.730547	0.685114	0.825752	0.812559	0.774048	0.680073	0.813574	0.792283	0.88979	0.840983	0.722464	0.694194	0.697221	0.76696	0.712363	0.742678	0.746724	0.731558	0.714383	0.739645	0.67604	0.742678	0.716403	0.659915	0.763924	0.835905	0.761899	0.817634	0.785189	0.710344	0.75684	0.63072	0.617644	0.342858	0.772023	0.476325	0.732569	0.588505	0.65085	0.745712	0.716403	0.769998
41	states	0.732569	0.732569	0.732569	0.323504	0.732569	0.732569	0.732569	0.732569	0.732569	0.732569	0.732569	0.732569	0.732569	0.732569	0.732569	0.732569	0.732569	0.732569	0.732569	0.732569	0.732569	0.732569	0.732569	0.732569	0.732569	0.732569	0.732569	0.732569	0.732569	0.732569	0.732569	0.732569	0.732569	0.732569	0.732569	0.732569	0.732569	0.732569	0.559403	0.323504	0.732569	0.559403	0.732569	0.559403	0.732569	0.732569	0.732569	0.732569
41	clusters	0.691259	0.691259	0.691259	0.382257	0.691259	0.691259	0.691259	0.691259	0.691259	0.691259	0.691259	0.691259	0.691259	0.691259	0.691259	0.691259	0.691259	0.691259	0.691259	0.691259	0.691259	0.691259	0.691259	0.691259	0.691259	0.691259	0.691259	0.691259	0.691259	0.691259	0.691259	0.691259	0.691259	0.691259	0.691259	0.691259	0.691259	0.691259	0.691259	0.382257	0.691259	0.691259	0.691259	0.691259	0.691259	0.691259	0.691259	0.691259
42	fret	0.694252	0.788488	0.683971	0.706609	0.730351	0.739663	0.768711	0.663453	0.63993	0.638909	0.519443	0.561736	0.720019	0.703517	0.737593	0.739663	0.683971	0.615466	0.661405	0.679858	0.635847	0.70867	0.751061	0.720019	0.71589	0.747951	0.729317	0.669602	0.763515	0.628707	0.745878	0.741734	0.722084	0.729317	0.687054	0.726216	0.688082	0.688082	0.644016	0.498391	0.565777	0.720019	0.559717	0.633806	0.704548	0.687054	0.839744	0.694252
42	states	0.705578	0.705578	0.705578	0.705578	0.705578	0.705578	0.705578	0.705578	0.705578	0.705578	0.56881	0.56881	0.705578	0.705578	0.705578	0.705578	0.705578	0.705578	0.705578	0.705578	0.705578	0.705578	0.705578	0.705578	0.705578	0.705578	0.705578	0.705578	0.705578	0.705578	0.705578	0.705578	0.705578	0.705578	0.705578	0.705578	0.705578	0.705578	0.705578	0.56881	0.56881	0.705578	0.56881	0.705578	0.705578	0.705578	0.705578	0.705578
42	clusters	0.691259	0.691259	0.691259	0.691259	0.691259	0.691259	0.691259	0.691259	0.691259	0.691259	0.691259	0.691259	0.691259	0.691259	0.691259	0.691259	0.691259	0.691259	0.691259	0.691259	0.691259	0.691259	0.691259	0.691259	0.691259	0.691259	0.691259	0.691259	0.691259	0.691259	0.691259	0.691259	0.691259	0.691259	0.691259	0.691259	0.691259	0.691259	0.691259	0.691259	0.691259	0.691259	0.691259	0.691259	0.691259	0.691259	0.691259	0.691259
43	fret	0.614234	0.670381	0.67627	0.659573	0.808734	0.720319	0.808734	0.680195	0.653672	0.736903	0.601379	0.703708	0.765123	0.673326	0.726176	0.722272	0.59346	0.794221	0.612258	0.671362	0.367811	0.528851	0.648752	0.887656	0.687058	0.720319	0.723248	0.423492	0.65859	0.692937	0.716412	0.734954	0.668417	0.656623	0.242038	0.395188	0.757347	0.602369	0.7252	0.292351	0.648752	0.341369	0.292351	0.436604	0.290303	0.244097	0.739827	0.713481
43	states	0.694895	0.694895	0.694895	0.694895	0.694895	0.694895	0.694895	0.694895	0.694895	0.694895	0.694895	0.694895	0.694895	0.694895	0.694895	0.694895	0.694895	0.694895	0.694895	0.694895	0.314337	0.694895	0.694895	0.694895	0.694895	0.694895	0.694895	0.314337	0.694895	0.694895	0.694895	0.694895	0.694895	0.694895	0.314337	0.314337	0.694895	0.694895	0.694895	0.314337	0.694895	0.314337	0.314337	0.314337	0.314337	0.314337	0.694895	0.694895
43	clusters	0.691259	0.691259	0.691259	0.691259	0.691259	0.691259	0.691259	0.691259	0.691259	0.691259	0.691259	0.691259	0.691259	0.691259	0.691259	0.691259	0.691259	0.691259	0.691259	0.691259	0.382257	0.691259	0.691259	0.691259	0.691259	0.691259	0.691259	0.382257	0.691259	0.691259	0.691259	0.691259	0.691259	0.691259	0.382257	0.382257	0.691259	0.691259	0.691259	0.382257	0.691259	0.382257	0.382257	0.382257	0.382257	0.382257	0.691259	0.691259
44	fret	0.744292	0.841816	0.702727	0.76864	0.727812	0.837259	0.786463	0.833845	0.7476	0.648947	0.795441	0.743191	0.64364	0.66177	0.763088	0.782008	0.650013	0.581624	0.820232	0.688648	0.912229	0.897079	0.656412	0.736589	0.784227	0.341132	0.797685	0.687568	0.528106	0.713606	0.799932	0.80218	0.673564	0.688648	0.584744	0.49468	0.432981	0.702727	0.673564	0.713606	0.757547	0.771976	0.707074	0.737689	0.692972	0.717969	0.758654	0.712516
44	states	0.720154	0.720154	0.720154	0.720154	0.720154	0.720154	0.720154	0.720154	0.720154	0.720154	0.720154	0.720154	0.720154	0.720154	0.720154	0.720154	0.720154	0.720154	0.720154	0.720154	0.720154	0.720154	0.720154	0.720154	0.720154	0.390044	0.720154	0.720154	0.720154	0.720154	0.720154	0.720154	0.720154	0.720154	0.720154	0.390044	0.390044	0.720154	0.720154	0.720154	0.720154	0.720154	0.720154	0.720154	0.720154	0.720154	0.720154	0.720154
44	clusters	0.691259	0.691259	0.691259	0.691259	0.691259	0.691259	0.691259	0.691259	0.691259	0.691259	0.691259	0.691259	0.691259	0.691259	0.691259	0.691259	0.691259	0.691259	0.691259	0.691259	0.691259	0.691259	0.691259	0.691259	0.691259	0.382257	0.691259	0.691259	0.691259	0.691259	0.691259	0.691259	0.691259	0.691259	0.691259	0.382257	0.382257	0.691259	0.691259	0.691259	0.691259	0.691259	0.691259	0.691259	0.691259	0.691259	0.691259	0.691259
45	fret	0.746262	0.748925	0.724789	0.776192	0.45767	0.389823	0.583514	0.715771	0.707616	0.668125	0.688439	0.797887	0.620126	0.65414	0.634393	0.601912	0.72928	0.738228	0.726587	0.721187	0.730177	0.551112	0.739121	0.592252	0.727485	0.725688	0.65788	0.718481	0.727485	0.703069	0.681079	0.738228	0.609603	0.376829	0.606723	0.722088	0.748038	0.598054	0.55902	0.755989	0.734654	0.725688	0.769191	0.661612	0.635339	0.705799	0.675539	0.704889
45	states	0.727036	0.727036	0.727036	0.620126	0.461308	0.461308	0.620126	0.727036	0.727036	0.727036	0.727036	0.727036	0.620126	0.620126	0.620126	0.620126	0.727036	0.727036	0.727036	0.727036	0.727036	0.620126	0.727036	0.620126	0.727036	0.727036	0.620126	0.727036	0.727036	0.727036	0.727036	0.727036	0.620126	0.461308	0.620126	0.727036	0.727036	0.620126	0.620126	0.727036	0.727036	0.727036	0.727036	0.620126	0.620126	0.727036	0.620126	0.727036
45	clusters	0.691259	0.691259	0.691259	0.691259	0.382257	0.382257	0.691259	0.691259	0.691259	0.691259	0.691259	0.691259	0.691259	0.691259	0.691259	0.691259	0.691259	0.691259	0.691259	0.691259	0.691259	0.691259	0.691259	0.691259	0.691259	0.691259	0.691259	0.691259	0.691259	0.691259	0.691259	0.691259	0.691259	0.382257	0.691259	0.691259	0.691259	0.691259	0.691259	0.691259	0.691259	0.691259	0.691259	0.691259	0.691259	0.691259	0.691259	0.691259
46	fret	0.323694	0.578916	0.676229	0.570077	0.591726	0.428068	0.258934	0.436344	0.69082	0.731403	0.725263	0.636961	0.602132	0.710109	0.69082	0.634225	0.704125	0.61935	0.638332	0.561341	0.657787	0.666273	0.607389	0.664852	0.481507	0.653577	0.417864	0.699666	0.627428	0.662019	0.656381	0.67767	0.671982	0.654978	0.560101	0.699666	0.707112	0.660605	0.645225	0.172125	0.594314	0.482618	0.63014	0.465037	0.682009	0.642461	0.664852	0.618012
46	states	0.432206	0.646611	0.646611	0.646611	0.646611	0.432206	0.432206	0.432206	0.646611	0.646611	0.646611	0.646611	0.646611	0.646611	0.646611	0.646611	0.646611	0.646611	0.646611	0.646611	0.646611	0.646611	0.646611	0.646611	0.432206	0.646611	0.432206	0.646611	0.646611	0.646611	0.646611	0.646611	0.646611	0.646611	0.646611	0.646611	0.646611	0.646611	0.646611	0.432206	0.646611	0.432206	0.646611	0.432206	0.646611	0.646611	0.646611	0.646611
46	clusters	0.382257	0.691259	0.691259	0.691259	0.691259	0.382257	0.382257	0.382257	0.691259	0.691259	0.691259	0.691259	0.691259	0.691259	0.691259	0.691259	0.691259	0.691259	0.691259	0.691259	0.691259	0.691259	0.691259	0.691259	0.382257	0.691259	0.382257	0.691259	0.691259	0.691259	0.691259	0.691259	0.691259	0.691259	0.691259	0.691259	0.691259	0.691259	0.691259	0.382257	0.691259	0.382257	0.691259	0.382257	0.691259	0.691259	0.691259	0.691259
47	fret	0.21207	0.559056	0.328486	0.422833	0.807043	0.684302	0.671705	0.642465	0.811379	0.729765	0.758573	0.849518	0.742543	0.708556	0.765002	0.582564	0.350651	0.544815	0.704327	0.692722	0.813549	0.728701	0.640384	0.718086	0.671705	0.65184	0.736149	0.72339	0.721268	0.584615	0.719146	0.753223	0.661229	0.769294	0.26369	0.338107	0.437629	0.76393	0.537706	0.747879	0.677999	0.713848	0.72339	0.562115	0.255195	0.322724	0.330408	0.663321
47	states	0.341964	0.341964	0.341964	0.341964	0.708556	0.708556	0.708556	0.708556	0.708556	0.708556	0.708556	0.708556	0.708556	0.708556	0.708556	0.708556	0.341964	0.341964	0.708556	0.708556	0.708556	0.708556	0.708556	0.708556	0.708556	0.708556	0.708556	0.708556	0.708556	0.708556	0.708556	0.708556	0.708556	0.708556	0.341964	0.341964	0.341964	0.708556	0.708556	0.708556	0.708556	0.708556	0.708556	0.341964	0.341964	0.341964	0.341964	0.708556
47	clusters	0.382257	0.382257	0.382257	0.382257	0.691259	0.691259	0.691259	0.691259	0.691259	0.691259	0.691259	0.691259	0.691259	0.691259	0.691259	0.691259	0.382257	0.382257	0.691259	0.691259	0.691259	0.691259	0.691259	0.691259	0.691259	0.691259	0.691259	0.691259	0.691259	0.691259	0.691259	0.691259	0.691259	0.691259	0.382257	0.382257	0.382257	0.691259	0.691259	0.691259	0.691259	0.691259	0.691259	0.382257	0.382257	0.382257	0.382257	0.691259
48	fret	0.757172	0.788425	0.792325	0.658945	0.642162	0.681613	0.658945	0.797199	0.675704	0.708166	0.776715	0.372211	0.730735	0.776715	0.762061	0.688503	0.653025	0.761083	0.690471	0.685551	0.656972	0.700308	0.516982	0.763039	0.80986	0.735636	0.551893	0.764993	0.75815	0.714058	0.723871	0.773786	0.741513	0.737595	0.708166	0.723871	0.664863	0.338775	0.355	0.364114	0.641173	0.734656	0.389398	0.698342	0.673734	0.729755	0.712094	0.718965
48	states	0.705222	0.705222	0.705222	0.705222	0.705222	0.705222	0.705222	0.705222	0.705222	0.705222	0.705222	0.389398	0.705222	0.705222	0.705222	0.705222	0.705222	0.705222	0.705222	0.705222	0.705222	0.705222	0.389398	0.705222	0.705222	0.705222	0.705222	0.705222	0.705222	0.705222	0.705222	0.705222	0.705222	0.705222	0.705222	0.705222	0.705222	0.389398	0.389398	0.389398	0.705222	0.705222	0.389398	0.705222	0.705222	0.705222	0.705222	0.705222
48	clusters	0.691259	0.691259	0.691259	0.691259	0.691259	0.691259	0.691259	0.691259	0.691259	0.691259	0.691259	0.382257	0.691259	0.691259	0.691259	0.691259	0.691259	0.691259	0.691259	0.691259	0.691259	0.691259	0.382257	0.691259	0.691259	0.691259	0.691259	0.691259	0.691259	0.691259	0.691259	0.691259	0.691259	0.691259	0.691259	0.691259	0.691259	0.382257	0.382257	0.382257	0.691259	0.691259	0.382257	0.691259	0.691259	0.691259	0.691259	0.691259
49	fret	0.697906	0.705939	0.661776	0.737076	0.690878	0.747125	0.689874	0.651745	0.67482	0.705939	0.74612	0.74813	0.687867	0.69891	0.768233	0.712968	0.730043	0.679838	0.775271	0.697906	0.669803	0.761196	0.658767	0.690878	0.678835	0.777282	0.609635	0.730043	0.699914	0.729039	0.711964	0.739086	0.794379	0.724016	0.719998	0.69389	0.701922	0.718994	0.724016	0.734062	0.747125	0.747125	0.676827	0.75617	0.780299	0.724016	0.763206	0.75215
49	states	0.712968	0.712968	0.712968	0.712968	0.712968	0.712968	0.712968	0.712968	0.712968	0.712968	0.712968	0.712968	0.712968	0.712968	0.712968	0.712968	0.712968	0.712968	0.712968	0.712968	0.712968	0.712968	0.712968	0.712968	0.712968	0.712968	0.712968	0.712968	0.712968	0.712968	0.712968	0.712968	0.712968	0.712968	0.712968	0.712968	0.712968	0.712968	0.712968	0.712968	0.712968	0.712968	0.712968	0.712968	0.712968	0.712968	0.712968	0.712968
49	clusters	0.691259	0.691259	0.691259	0.691259	0.691259	0.691259	0.691259	0.691259	0.691259	0.691259	0.691259	0.691259	0.691259	0.691259	0.691259	0.691259	0.691259	0.691259	0.691259	0.691259	0.691259	0.691259	0.691259	0.691259	0.691259	0.691259	0.691259	0.691259	0.691259	0.691259	0.691259	0.691259	0.691259	0.691259	0.691259	0.691259	0.691259	0.691259	0.691259	0.691259	0.691259	0.691259	0.691259	0.691259	0.691259	0.691259	0.691259	0.691259
50	fret	0.678874	0.786673	0.726797	0.652909	0.352915	0.436986	0.544994	0.781685	0.76073	0.771707	0.854499	0.797648	0.789666	0.807623	0.778691	0.805628	0.723802	0.775698	0.489001	0.695849	0.821588	0.78368	0.541995	0.378943	0.694851	0.780687	0.789666	0.825578	0.459995	0.755741	0.759732	0.809619	0.832559	0.715816	0.781685	0.829567	0.799643	0.736778	0.516001	0.680872	0.738774	0.755741	0.751749	0.849513	0.794655	0.752747	0.527999	0.684866
50	states	0.671884	0.771707	0.771707	0.671884	0.465497	0.465497	0.465497	0.771707	0.771707	0.771707	0.771707	0.771707	0.771707	0.771707	0.771707	0.771707	0.771707	0.771707	0.465497	0.671884	0.771707	0.771707	0.465497	0.465497	0.671884	0.771707	0.771707	0.771707	0.465497	0.771707	0.771707	0.771707	0.771707	0.771707	0.771707	0.771707	0.771707	0.771707	0.465497	0.671884	0.771707	0.771707	0.771707	0.771707	0.771707	0.771707	0.465497	0.671884
50	clusters	0.691259	0.691259	0.691259	0.691259	0.382257	0.382257	0.382257	0.691259	0.691259	0.691259	0.691259	0.691259	0.691259	0.691259	0.691259	0.691259	0.691259	0.691259	0.382257	0.691259	0.691259	0.691259	0.382257	0.382257	0.691259	0.691259	0.691259	0.691259	0.382257	0.691259	0.691259	0.691259	0.691259	0.691259	0.691259	0.691259	0.691259	0.691259	0.382257	0.691259	0.691259	0.691259	0.691259	0.691259	0.691259	0.691259	0.382257	0.691259
51	fret	0.315107	0.363552	0.600315	0.716681	0.711601	0.675082	0.699418	0.685214	0.64169	0.665967	0.745162	0.675082	0.736001	0.677108	0.683187	0.702463	0.675082	0.701448	0.677108	0.645733	0.708555	0.691301	0.730915	0.737019	0.722779	0.678122	0.710586	0.722779	0.628558	0.664955	0.282577	0.323992	0.682173	0.704493	0.673056	0.716681	0.717697	0.502919	0.165911	0.319055	0.579171	0.685214	0.715665	0.72583	0.756367	0.708555	0.706524	0.659894
51	states	0.364543	0.364543	0.706524	0.706524	0.706524	0.706524	0.706524	0.706524	0.706524	0.706524	0.706524	0.706524	0.706524	0.706524	0.706524	0.706524	0.706524	0.706524	0.706524	0.706524	0.706524	0.706524	0.706524	0.706524	0.706524	0.706524	0.706524	0.706524	0.706524	0.706524	0.364543	0.364543	0.706524	0.706524	0.706524	0.706524	0.706524	0.364543	0.364543	0.364543	0.364543	0.706524	0.706524	0.706524	0.706524	0.706524	0.706524	0.706524
51	clusters	0.382257	0.382257	0.691259	0.691259	0.691259	0.691259	0.691259	0.691259	0.691259	0.691259	0.691259	0.691259	0.691259	0.691259	0.691259	0.691259	0.691259	0.691259	0.691259	0.691259	0.691259	0.691259	0.691259	0.691259	0.691259	0.691259	0.691259	0.691259	0.691259	0.691259	0.382257	0.382257	0.691259	0.691259	0.691259	0.691259	0.691259	0.382257	0.382257	0.382257	0.382257	0.691259	0.691259	0.691259	0.691259	0.691259	0.691259	0.691259
52	fret	0.75548	0.743227	0.673011	0.775928	0.738126	0.703491	0.634513	0.772859	0.764677	0.736086	0.763655	0.741186	0.724871	0.740166	0.589079	0.736086	0.503718	0.283568	0.321954	0.401078	0.768767	0.658814	0.509724	0.742207	0.808713	0.789238	0.533777	0.306191	0.319982	0.537791	0.366397	0.509724	0.798461	0.7657	0.714685	0.789238	0.715704	0.600169	0.742207	0.487717	0.656787	0.809739	0.7657	0.705525	0.640583	0.685191	0.805639	0.597144
52	states	0.740166	0.740166	0.740166	0.740166	0.740166	0.740166	0.740166	0.740166	0.740166	0.740166	0.740166	0.740166	0.740166	0.740166	0.526757	0.740166	0.526757	0.526757	0.526757	0.526757	0.740166	0.740166	0.526757	0.740166	0.740166	0.740166	0.526757	0.526757	0.526757	0.526757	0.526757	0.526757	0.740166	0.740166	0.740166	0.740166	0.740166	0.526757	0.740166	0.526757	0.740166	0.740166	0.740166	0.740166	0.740166	0.740166	0.740166	0.526757
52	clusters	0.691259	0.691259	0.691259	0.691259	0.691259	0.691259	0.691259	0.691259	0.691259	0.691259	0.691259	0.691259	0.691259	0.691259	0.382257	0.691259	0.382257	0.382257	0.382257	0.382257	0.691259	0.691259	0.382257	0.691259	0.691259	0.691259	0.382257	0.382257	0.382257	0.382257	0.382257	0.382257	0.691259	0.691259	0.691259	0.691259	0.691259	0.382257	0.691259	0.382257	0.691259	0.691259	0.691259	0.691259	0.691259	0.691259	0.691259	0.382257
53	fret	0.261812	0.472161	0.693741	0.338074	0.601822	0.773238	0.466143	0.308642	0.385625	0.199438	0.323874	0.278121	0.261812	0.246504	0.846383	0.665152	0.698666	0.709485	0.719315	0.667126	0.667126	0.347194	0.282195	0.200463	0.242418	0.118189	0.608765	0.779105	0.809378	0.749737	0.722263	0.70457	0.739932	0.755617	0.679948	0.61273	0.73797	0.836656	0.731101	0.665152	0.823028	0.586931	0.769324	0.730119	0.763451	0.448073	0.406812	0.685861
53	states	0.254671	0.484187	0.70457	0.484187	0.70457	0.70457	0.484187	0.254671	0.484187	0.254671	0.254671	0.254671	0.254671	0.254671	0.70457	0.70457	0.70457	0.70457	0.70457	0.70457	0.70457	0.254671	0.254671	0.254671	0.254671	0.254671	0.70457	0.70457	0.70457	0.70457	0.70457	0.70457	0.70457	0.70457	0.70457	0.70457	0.70457	0.70457	0.70457	0.70457	0.70457	0.70457	0.70457	0.70457	0.70457	0.484187	0.484187	0.70457
53	clusters	0.382257	0.382257	0.691259	0.382257	0.691259	0.691259	0.382257	0.382257	0.382257	0.382257	0.382257	0.382257	0.382257	0.382257	0.691259	0.691259	0.691259	0.691259	0.691259	0.691259	0.691259	0.382257	0.382257	0.382257	0.382257	0.382257	0.691259	0.691259	0.691259	0.691259	0.691259	0.691259	0.691259	0.691259	0.691259	0.691259	0.691259	0.691259	0.691259	0.691259	0.691259	0.691259	0.691259	0.691259	0.691259	0.382257	0.382257	0.691259
54	fret	0.739675	0.524934	0.348302	0.554771	0.782469	0.691684	0.77868	0.686859	0.725327	0.792872	0.785308	0.753029	0.774888	0.635422	0.772991	0.805139	0.757789	0.704207	0.292209	0.300558	0.353464	0.573575	0.768246	0.725327	0.616851	0.795706	0.746357	0.719576	0.829588	0.783415	0.732028	0.751124	0.698431	0.696505	0.547825	0.845494	0.735853	0.743494	0.744449	0.835203	0.861356	0.749217	0.721494	0.789092	0.745403	0.758741	0.753981	0.79665
54	states	0.749694	0.749694	0.278613	0.749694	0.749694	0.749694	0.749694	0.749694	0.749694	0.749694	0.749694	0.749694	0.749694	0.749694	0.749694	0.749694	0.749694	0.749694	0.278613	0.278613	0.278613	0.749694	0.749694	0.749694	0.749694	0.749694	0.749694	0.749694	0.749694	0.749694	0.749694	0.749694	0.749694	0.749694	0.547825	0.749694	0.749694	0.749694	0.749694	0.749694	0.749694	0.749694	0.749694	0.749694	0.749694	0.749694	0.749694	0.749694
54	clusters	0.691259	0.691259	0.382257	0.691259	0.691259	0.691259	0.691259	0.691259	0.691259	0.691259	0.691259	0.691259	0.691259	0.691259	0.691259	0.691259	0.691259	0.691259	0.382257	0.382257	0.382257	0.691259	0.691259	0.691259	0.691259	0.691259	0.691259	0.691259	0.691259	0.691259	0.691259	0.691259	0.691259	0.691259	0.691259	0.691259	0.691259	0.691259	0.691259	0.691259	0.691259	0.691259	0.691259	0.691259	0.691259	0.691259	0.691259	0.691259
55	fret	0.811688	0.398772	0.339551	0.302531	0.689227	0.62271	0.744473	0.686307	0.503676	0.676562	0.730946	0.617792	0.756044	0.71061	0.832672	0.746403	0.771442	0.691173	0.757971	0.380449	0.384525	0.681436	0.780087	0.629588	0.407916	0.253893	0.704787	0.645283	0.748332	0.787762	0.802128	0.66485	0.686307	0.780087	0.766634	0.802128	0.697009	0.727077	0.609917	0.623693	0.70867	0.757008	0.782006	0.618776	0.315922	0.237256	0.691173	0.396739
55	states	0.722236	0.332368	0.332368	0.332368	0.722236	0.722236	0.722236	0.722236	0.332368	0.722236	0.722236	0.722236	0.722236	0.722236	0.722236	0.722236	0.722236	0.722236	0.722236	0.332368	0.332368	0.722236	0.722236	0.722236	0.332368	0.332368	0.722236	0.722236	0.722236	0.722236	0.722236	0.722236	0.722236	0.722236	0.722236	0.722236	0.722236	0.722236	0.722236	0.722236	0.722236	0.722236	0.722236	0.722236	0.332368	0.332368	0.722236	0.332368
55	clusters	0.691259	0.382257	0.382257	0.382257	0.691259	0.691259	0.691259	0.691259	0.382257	0.691259	0.691259	0.691259	0.691259	0.691259	0.691259	0.691259	0.691259	0.691259	0.691259	0.382257	0.382257	0.691259	0.691259	0.691259	0.382257	0.382257	0.691259	0.691259	0.691259	0.691259	0.691259	0.691259	0.691259	0.691259	0.691259	0.691259	0.691259	0.691259	0.691259	0.691259	0.691259	0.691259	0.691259	0.691259	0.382257	0.382257	0.691259	0.382257
56	fret	0.732518	0.643109	0.613874	0.72871	0.715363	0.730614	0.686599	0.693326	0.725851	0.519002	0.701001	0.64408	0.222801	0.424108	0.667324	0.332381	0.439386	0.592318	0.423088	0.722991	0.303135	0.266313	0.355228	0.295795	0.325087	0.281078	0.217464	0.301039	0.288442	0.513005	0.746768	0.778898	0.623641	0.550852	0.617783	0.722991	0.669255	0.712496	0.731566	0.722991	0.708662	0.718228	0.723945	0.661524	0.699083	0.3573	0.742023	0.709619
56	states	0.710097	0.710097	0.710097	0.710097	0.710097	0.710097	0.710097	0.710097	0.710097	0.3573	0.710097	0.710097	0.3573	0.3573	0.710097	0.3573	0.3573	0.3573	0.3573	0.710097	0.3573	0.3573	0.3573	0.3573	0.3573	0.3573	0.3573	0.3573	0.3573	0.3573	0.710097	0.710097	0.3573	0.3573	0.3573	0.710097	0.710097	0.710097	0.710097	0.710097	0.710097	0.710097	0.710097	0.710097	0.710097	0.3573	0.710097	0.710097
56	clusters	0.691259	0.691259	0.691259	0.691259	0.691259	0.691259	0.691259	0.691259	0.691259	0.382257	0.691259	0.691259	0.382257	0.382257	0.691259	0.382257	0.382257	0.382257	0.382257	0.691259	0.382257	0.382257	0.382257	0.382257	0.382257	0.382257	0.382257	0.382257	0.382257	0.382257	0.691259	0.691259	0.382257	0.382257	0.382257	0.691259	0.691259	0.691259	0.691259	0.691259	0.691259	0.691259	0.691259	0.691259	0.691259	0.382257	0.691259	0.691259
57	fret	0.71541	0.811978	0.750674	0.777184	0.780959	0.708698	0.73736	0.704863	0.698143	0.723052	0.706781	0.651798	0.762054	0.703904	0.708698	0.704863	0.717323	0.577446	0.461602	0.756367	0.735455	0.700064	0.78944	0.741168	0.779072	0.679855	0.686601	0.674064	0.710622	0.774351	0.628448	0.771516	0.70774	0.743071	0.769625	0.76868	0.730688	0.714453	0.684675	0.663429	0.650828	0.724007	0.723052	0.76868	0.741168	0.742119	0.697183	0.709656
57	states	0.730688	0.730688	0.730688	0.730688	0.730688	0.730688	0.730688	0.730688	0.730688	0.730688	0.730688	0.730688	0.730688	0.730688	0.730688	0.730688	0.730688	0.606939	0.606939	0.730688	0.730688	0.730688	0.730688	0.730688	0.730688	0.730688	0.730688	0.730688	0.730688	0.730688	0.730688	0.730688	0.730688	0.730688	0.730688	0.730688	0.730688	0.730688	0.730688	0.730688	0.730688	0.730688	0.730688	0.730688	0.730688	0.730688	0.730688	0.730688
57	clusters	0.691259	0.691259	0.691259	0.691259	0.691259	0.691259	0.691259	0.691259	0.691259	0.691259	0.691259	0.691259	0.691259	0.691259	0.691259	0.691259	0.691259	0.691259	0.691259	0.691259	0.691259	0.691259	0.691259	0.691259	0.691259	0.691259	0.691259	0.691259	0.691259	0.691259	0.691259	0.691259	0.691259	0.691259	0.691259	0.691259	0.691259	0.691259	0.691259	0.691259	0.691259	0.691259	0.691259	0.691259	0.691259	0.691259	0.691259	0.691259
58	fret	0.261247	0.269943	0.262213	0.299023	0.571717	0.609274	0.677817	0.710809	0.736692	0.729435	0.725291	0.702547	0.709775	0.783532	0.688113	0.689143	0.735655	0.664467	0.6696	0.760592	0.735655	0.706676	0.761633	0.765799	0.66652	0.792939	0.736692	0.736692	0.715977	0.399848	0.362471	0.309718	0.720115	0.739805	0.733581	0.681931	0.511257	0.715977	0.670627	0.713909	0.690173	0.713909	0.722185	0.714943	0.737729	0.75123	0.700483	0.657287
58	states	0.386559	0.386559	0.386559	0.386559	0.386559	0.708742	0.708742	0.708742	0.708742	0.708742	0.708742	0.708742	0.708742	0.708742	0.708742	0.708742	0.708742	0.708742	0.708742	0.708742	0.708742	0.708742	0.708742	0.708742	0.708742	0.708742	0.708742	0.708742	0.708742	0.386559	0.386559	0.386559	0.708742	0.708742	0.708742	0.708742	0.386559	0.708742	0.708742	0.708742	0.708742	0.708742	0.708742	0.708742	0.708742	0.708742	0.708742	0.708742
58	clusters	0.382257	0.382257	0.382257	0.382257	0.382257	0.691259	0.691259	0.691259	0.691259	0.691259	0.691259	0.691259	0.691259	0.691259	0.691259	0.691259	0.691259	0.691259	0.691259	0.691259	0.691259	0.691259	0.691259	0.691259	0.691259	0.691259	0.691259	0.691259	0.691259	0.382257	0.382257	0.382257	0.691259	0.691259	0.691259	0.691259	0.382257	0.691259	0.691259	0.691259	0.691259	0.691259	0.691259	0.691259	0.691259	0.691259	0.691259	0.691259
59	fret	0.667414	0.697155	0.412877	0.343457	0.755515	0.790058	0.495072	0.334385	0.689227	0.636638	0.462032	0.756503	0.663446	0.713986	0.706067	0.736739	0.733772	0.791044	0.723882	0.571959	0.801888	0.728828	0.67039	0.74267	0.741681	0.750576	0.805829	0.409863	0.345472	0.353533	0.183614	0.278859	0.38574	0.322283	0.303107	0.343457	0.294017	0.434961	0.373668	0.31522	0.305126	0.770326	0.699136	0.794002	0.759466	0.739705	0.677332	0.72685
59	states	0.721408	0.721408	0.334385	0.334385	0.721408	0.721408	0.495072	0.334385	0.721408	0.721408	0.495072	0.721408	0.721408	0.721408	0.721408	0.721408	0.721408	0.721408	0.721408	0.495072	0.721408	0.721408	0.721408	0.721408	0.721408	0.721408	0.721408	0.334385	0.334385	0.334385	0.334385	0.334385	0.334385	0.334385	0.334385	0.334385	0.334385	0.334385	0.334385	0.334385	0.334385	0.721408	0.721408	0.721408	0.721408	0.721408	0.721408	0.721408
59	clusters	0.691259	0.691259	0.382257	0.382257	0.691259	0.691259	0.382257	0.382257	0.691259	0.691259	0.382257	0.691259	0.691259	0.691259	0.691259	0.691259	0.691259	0.691259	0.691259	0.382257	0.691259	0.691259	0.691259	0.691259	0.691259	0.691259	0.691259	0.382257	0.382257	0.382257	0.382257	0.382257	0.382257	0.382257	0.382257	0.382257	0.382257	0.382257	0.382257	0.382257	0.382257	0.691259	0.691259	0.691259	0.691259	0.691259	0.691259	0.691259
60	fret	0.476413	0.367964	0.362018	0.448477	0.46144	0.867085	0.708953	0.672468	0.777098	0.806692	0.689683	0.723166	0.752651	0.700837	0.477411	0.333312	0.392766	0.4196	0.61892	0.274102	0.362018	0.620937	0.772002	0.700837	0.338256	0.692726	0.576625	0.769963	0.681579	0.353103	0.38284	0.72215	0.789337	0.766907	0.720119	0.837369	0.739426	0.769963	0.731294	0.669432	0.619929	0.777098	0.716058	0.696781	0.645164	0.309599	0.414627	0.421589
60	states	0.38284	0.38284	0.38284	0.38284	0.38284	0.728246	0.728246	0.728246	0.728246	0.728246	0.728246	0.728246	0.728246	0.728246	0.38284	0.38284	0.38284	0.38284	0.595743	0.38284	0.38284	0.595743	0.728246	0.728246	0.38284	0.728246	0.595743	0.728246	0.728246	0.38284	0.38284	0.728246	0.728246	0.728246	0.728246	0.728246	0.728246	0.728246	0.728246	0.728246	0.595743	0.728246	0.728246	0.728246	0.595743	0.38284	0.38284	0.38284
60	clusters	0.382257	0.382257	0.382257	0.382257	0.382257	0.691259	0.691259	0.691259	0.691259	0.691259	0.691259	0.691259	0.691259	0.691259	0.382257	0.382257	0.382257	0.382257	0.691259	0.382257	0.382257	0.691259	0.691259	0.691259	0.382257	0.691259	0.691259	0.691259	0.691259	0.382257	0.382257	0.691259	0.691259	0.691259	0.691259	0.691259	0.691259	0.691259	0.691259	0.691259	0.691259	0.691259	0.691259	0.691259	0.691259	0.382257	0.382257	0.382257
61	fret	0.708738	0.703455	0.708738	0.656213	0.647872	0.463626	0.667702	0.698179	0.705567	0.672948	0.622951	0.709795	0.661427	0.677142	0.60436	0.6719	0.677142	0.720384	0.673996	0.653083	0.627093	0.690803	0.746978	0.737385	0.630203	0.672948	0.6719	0.670843	0.332527	0.400466	0.704511	0.708738	0.660382	0.664563	0.729938	0.638508	0.647872	0.701343	0.485573	0.409287	0.554182	0.432907	0.68029	0.657257	0.636431	0.645789	0.327719	0.313331
61	states	0.681341	0.681341	0.681341	0.681341	0.681341	0.400466	0.681341	0.681341	0.681341	0.681341	0.681341	0.681341	0.681341	0.681341	0.681341	0.681341	0.681341	0.681341	0.681341	0.681341	0.681341	0.681341	0.681341	0.681341	0.681341	0.681341	0.681341	0.681341	0.400466	0.400466	0.681341	0.681341	0.681341	0.681341	0.681341	0.681341	0.681341	0.681341	0.400466	0.400466	0.400466	0.400466	0.681341	0.681341	0.681341	0.681341	0.400466	0.400466
61	clusters	0.691259	0.691259	0.691259	0.691259	0.691259	0.382257	0.691259	0.691259	0.691259	0.691259	0.691259	0.691259	0.691259	0.691259	0.691259	0.691259	0.691259	0.691259	0.691259	0.691259	0.691259	0.691259	0.691259	0.691259	0.691259	0.691259	0.691259	0.691259	0.382257	0.382257	0.691259	0.691259	0.691259	0.691259	0.691259	0.691259	0.691259	0.691259	0.382257	0.382257	0.382257	0.382257	0.691259	0.691259	0.691259	0.691259	0.382257	0.382257
62	fret	0.72533	0.760423	0.752149	0.776895
62	states	0.756286	0.756286	0.756286	0.756286
62	clusters	0.691259	0.691259	0.691259	0.691259
63	fret	0.332372	0.358208	0.462829	0.277811	0.289705	0.301604	0.264933	0.325421	0.337339	0.334359	0.265923	0.283757	0.287722	0.377106	0.289705	0.279792	0.433888	0.267904	0.272857	0.287722	0.319465	0.338332	0.537838	0.677476	0.569914	0.337339	0.382081	0.731942	0.417936	0.297637	0.377106	0.399006	0.51381	0.956137	0.334359	0.337339	0.275829	0.291688	0.382081	0.343299	0.334359	0.290696	0.338332	0.431894	0.525821	0.718819	0.789568	0.712764
63	states	0.316487	0.316487	0.482309	0.316487	0.316487	0.316487	0.316487	0.316487	0.316487	0.316487	0.316487	0.316487	0.316487	0.316487	0.316487	0.316487	0.482309	0.316487	0.316487	0.316487	0.316487	0.316487	0.482309	0.681506	0.482309	0.316487	0.482309	0.681506	0.482309	0.316487	0.316487	0.316487	0.482309	0.681506	0.316487	0.316487	0.316487	0.316487	0.316487	0.316487	0.316487	0.316487	0.316487	0.482309	0.482309	0.681506	0.681506	0.681506
63	clusters	0.382257	0.382257	0.382257	0.382257	0.382257	0.382257	0.382257	0.382257	0.382257	0.382257	0.382257	0.382257	0.382257	0.382257	0.382257	0.382257	0.382257	0.382257	0.382257	0.382257	0.382257	0.382257	0.382257	0.691259	0.382257	0.382257	0.382257	0.691259	0.382257	0.382257	0.382257	0.382257	0.382257	0.691259	0.382257	0.382257	0.382257	0.382257	0.382257	0.382257	0.382257	0.382257	0.382257	0.382257	0.382257	0.691259	0.691259	0.691259
64	fret	0.512645	0.606174	0.600633	0.644409	0.680144	0.54422	0.305074	0.220975	0.600633	0.483774	0.382481	0.248124	0.406398	0.655844	0.619557	0.618414	0.596216	0.591812	0.586325	0.379638	0.261914	0.304179	0.31496	0.483774	0.619557	0.606174	0.633061	0.680144	0.57107	0.58195	0.474623	0.515772	0.589614	0.518905	0.363643	0.270599	0.299712	0.324011	0.280238	0.237876	0.260182	0.238727	0.409297	0.352465	0.355251	0.33587	0.30866	0.318573
64	states	0.594014	0.594014	0.594014	0.594014	0.594014	0.594014	0.318573	0.318573	0.594014	0.594014	0.318573	0.318573	0.318573	0.594014	0.594014	0.594014	0.594014	0.594014	0.594014	0.318573	0.318573	0.318573	0.318573	0.318573	0.594014	0.594014	0.594014	0.594014	0.594014	0.594014	0.594014	0.594014	0.594014	0.594014	0.318573	0.318573	0.318573	0.318573	0.318573	0.318573	0.318573	0.318573	0.318573	0.318573	0.318573	0.318573	0.318573	0.318573
64	clusters	0.691259	0.691259	0.691259	0.691259	0.691259	0.691259	0.382257	0.382257	0.691259	0.691259	0.382257	0.382257	0.382257	0.691259	0.691259	0.691259	0.691259	0.691259	0.691259	0.382257	0.382257	0.382257	0.382257	0.382257	0.691259	0.691259	0.691259	0.691259	0.691259	0.691259	0.691259	0.691259	0.691259	0.691259	0.382257	0.382257	0.382257	0.382257	0.382257	0.382257	0.382257	0.382257	0.382257	0.382257	0.382257	0.382257	0.382257	0.382257
65	fret	0.669937	0.727433	0.534539	0.589394	0.696723	0.700688	0.743268	0.596366	0.662988	0.675892	0.731393	0.681845	0.733372	0.242058	0.351052	0.625227	0.725453	0.7403	0.626221	0.677877	0.428439	0.747225	0.734362	0.614284	0.77688	0.649084	0.763046	0.685813	0.564477	0.704651	0.811427	0.730403	0.766999	0.791692	0.442481	0.570461	0.150827	0.242058	0.374195	0.759092	0.745246	0.759092	0.682837	0.520554	0.642128	0.624232	0.506561	0.663981
65	states	0.720502	0.720502	0.59288	0.59288	0.720502	0.720502	0.720502	0.59288	0.720502	0.720502	0.720502	0.720502	0.720502	0.31377	0.31377	0.59288	0.720502	0.720502	0.59288	0.720502	0.31377	0.720502	0.720502	0.59288	0.720502	0.720502	0.720502	0.720502	0.59288	0.720502	0.720502	0.720502	0.720502	0.720502	0.31377	0.59288	0.31377	0.31377	0.31377	0.720502	0.720502	0.720502	0.720502	0.59288	0.59288	0.59288	0.59288	0.720502
65	clusters	0.691259	0.691259	0.691259	0.691259	0.691259	0.691259	0.691259	0.691259	0.691259	0.691259	0.691259	0.691259	0.691259	0.382257	0.382257	0.691259	0.691259	0.691259	0.691259	0.691259	0.382257	0.691259	0.691259	0.691259	0.691259	0.691259	0.691259	0.691259	0.691259	0.691259	0.691259	0.691259	0.691259	0.691259	0.382257	0.691259	0.382257	0.382257	0.382257	0.691259	0.691259	0.691259	0.691259	0.691259	0.691259	0.691259	0.691259	0.691259
66	fret	0.676757	0.800577	0.824718	0.851942	0.672114	0.767297	0.828996	0.819572	0.742403	0.737003	0.290367	0.703467	0.828996	0.721669	0.781383	0.799709	0.787512	0.722575	0.763758	0.824718	0.784012	0.846006	0.320562	0.784012	0.76818	0.766413	0.804911	0.739714	0.783136	0.765528	0.796232	0.809236	0.734306	0.614532	0.407528	0.818713	0.760213	0.738799	0.830704	0.811825	0.872893	0.807507	0.772592	0.79884	0.801445	0.797971	0.792749	0.765528
66	states	0.7611	0.7611	0.7611	0.7611	0.7611	0.7611	0.7611	0.7611	0.7611	0.7611	0.447555	0.7611	0.7611	0.7611	0.7611	0.7611	0.7611	0.7611	0.7611	0.7611	0.7611	0.7611	0.447555	0.7611	0.7611	0.7611	0.7611	0.7611	0.7611	0.7611	0.7611	0.7611	0.7611	0.447555	0.447555	0.7611	0.7611	0.7611	0.7611	0.7611	0.7611	0.7611	0.7611	0.7611	0.7611	0.7611	0.7611	0.7611
66	clusters	0.691259	0.691259	0.691259	0.691259	0.691259	0.691259	0.691259	0.691259	0.691259	0.691259	0.382257	0.691259	0.691259	0.691259	0.691259	0.691259	0.691259	0.691259	0.691259	0.691259	0.691259	0.691259	0.382257	0.691259	0.691259	0.691259	0.691259	0.691259	0.691259	0.691259	0.691259	0.691259	0.691259	0.382257	0.382257	0.691259	0.691259	0.691259	0.691259	0.691259	0.691259	0.691259	0.691259	0.691259	0.691259	0.691259	0.691259	0.691259
67	fret	0.723757	0.734865	0.674176	0.764207	0.699553	0.677952	0.766031	0.758729	0.737619	0.729324	0.701423	0.765119	0.752322	0.740382	0.784195	0.75507	0.737619	0.614964	0.679837	0.297415	0.746818	0.760556	0.670396	0.774221	0.733943	0.685486	0.337312	0.365009	0.365009	0.467984	0.749572	0.43822	0.743142	0.739461	0.72283	0.710752	0.7459	0.753238	0.709821	0.754154	0.717263	0.758729	0.682663	0.699553	0.659971	0.640909	0.674176	0.442345
67	states	0.737619	0.737619	0.737619	0.737619	0.737619	0.737619	0.737619	0.737619	0.737619	0.737619	0.737619	0.737619	0.737619	0.737619	0.737619	0.737619	0.737619	0.737619	0.737619	0.463895	0.737619	0.737619	0.737619	0.737619	0.737619	0.737619	0.463895	0.463895	0.463895	0.463895	0.737619	0.463895	0.737619	0.737619	0.737619	0.737619	0.737619	0.737619	0.737619	0.737619	0.737619	0.737619	0.737619	0.737619	0.737619	0.737619	0.737619	0.463895
67	clusters	0.691259	0.691259	0.691259	0.691259	0.691259	0.691259	0.691259	0.691259	0.691259	0.691259	0.691259	0.691259	0.691259	0.691259	0.691259	0.691259	0.691259	0.691259	0.691259	0.382257	0.691259	0.691259	0.691259	0.691259	0.691259	0.691259	0.382257	0.382257	0.382257	0.382257	0.691259	0.382257	0.691259	0.691259	0.691259	0.691259	0.691259	0.691259	0.691259	0.691259	0.691259	0.691259	0.691259	0.691259	0.691259	0.691259	0.691259	0.382257
68	fret	0.334226	0.342877	0.345765	0.353479	0.304586	0.353479	0.354444	0.375741	0.574275	0.682404	0.714179	0.619643	0.694024	0.641491	0.582483	0.350584	0.321767	0.302682	0.337107	0.296976	0.344802	0.38547	0.331347	0.324638	0.279913	0.316982	0.297927	0.347692
68	states	0.337107	0.337107	0.337107	0.337107	0.337107	0.337107	0.337107	0.337107	0.641491	0.641491	0.641491	0.641491	0.641491	0.641491	0.641491	0.337107	0.337107	0.337107	0.337107	0.337107	0.337107	0.337107	0.337107	0.337107	0.337107	0.337107	0.337107	0.337107
68	clusters	0.382257	0.382257	0.382257	0.382257	0.382257	0.382257	0.382257	0.382257	0.691259	0.691259	0.691259	0.691259	0.691259	0.691259	0.691259	0.382257	0.382257	0.382257	0.382257	0.382257	0.382257	0.382257	0.382257	0.382257	0.382257	0.382257	0.382257	0.382257
69	fret	0.293775	0.482926	0.662012	0.654842	0.696946	0.631333	0.651771	0.596725	0.68048	0.667139	0.654842	0.748637	0.70416	0.742414	0.677398	0.719643	0.694886	0.693857	0.682535	0.67329	0.548153	0.322988	0.277277	0.302526	0.246329	0.38376	0.391638	0.650748	0.593679	0.626233	0.686653	0.678425	0.67329	0.713446	0.706222	0.493922	0.66919	0.690769	0.643588	0.681508	0.716544	0.60282	0.54211	0.357228	0.68974	0.663037	0.692827	0.739304
69	states	0.334708	0.334708	0.683568	0.683568	0.683568	0.683568	0.683568	0.683568	0.683568	0.683568	0.683568	0.683568	0.683568	0.683568	0.683568	0.683568	0.683568	0.683568	0.683568	0.683568	0.683568	0.334708	0.334708	0.334708	0.334708	0.334708	0.334708	0.683568	0.683568	0.683568	0.683568	0.683568	0.683568	0.683568	0.683568	0.334708	0.683568	0.683568	0.683568	0.683568	0.683568	0.683568	0.334708	0.334708	0.683568	0.683568	0.683568	0.683568
69	clusters	0.382257	0.382257	0.691259	0.691259	0.691259	0.691259	0.691259	0.691259	0.691259	0.691259	0.691259	0.691259	0.691259	0.691259	0.691259	0.691259	0.691259	0.691259	0.691259	0.691259	0.691259	0.382257	0.382257	0.382257	0.382257	0.382257	0.382257	0.691259	0.691259	0.691259	0.691259	0.691259	0.691259	0.691259	0.691259	0.382257	0.691259	0.691259	0.691259	0.691259	0.691259	0.691259	0.382257	0.382257	0.691259	0.691259	0.691259	0.691259
70	fret	0.732159	0.739788	0.697674	0.70344	0.746453	0.752158	0.72643	0.752158	0.72834	0.712082	0.619137	0.731205	0.72643	0.747404	0.72834	0.738835	0.729295	0.693827	0.695751	0.678405	0.702479	0.70632	0.693827	0.695751	0.770177	0.714956	0.754058	0.588734	0.580848	0.331937	0.330898	0.643518	0.682265	0.732159	0.713998	0.724518	0.71304	0.394877	0.707279	0.737882	0.727385	0.731205	0.698636	0.699597	0.702479	0.740741	0.71304	0.718786
70	states	0.722131	0.722131	0.722131	0.722131	0.722131	0.722131	0.722131	0.722131	0.722131	0.722131	0.572955	0.722131	0.722131	0.722131	0.722131	0.722131	0.722131	0.722131	0.722131	0.722131	0.722131	0.722131	0.722131	0.722131	0.722131	0.722131	0.722131	0.572955	0.572955	0.572955	0.572955	0.572955	0.722131	0.722131	0.722131	0.722131	0.722131	0.572955	0.722131	0.722131	0.722131	0.722131	0.722131	0.722131	0.722131	0.722131	0.722131	0.722131
70	clusters	0.691259	0.691259	0.691259	0.691259	0.691259	0.691259	0.691259	0.691259	0.691259	0.691259	0.691259	0.691259	0.691259	0.691259	0.691259	0.691259	0.691259	0.691259	0.691259	0.691259	0.691259	0.691259	0.691259	0.691259	0.691259	0.691259	0.691259	0.691259	0.691259	0.691259	0.691259	0.691259	0.691259	0.691259	0.691259	0.691259	0.691259	0.691259	0.691259	0.691259	0.691259	0.691259	0.691259	0.691259	0.691259	0.691259	0.691259	0.691259
71	fret	0.719568	0.39864	0.658977	0.772435	0.725881	0.778818	0.69231	0.732202	0.752275	0.757572	0.777754	0.738532	0.709065	0.731148	0.734311	0.642399	0.699633	0.336288	0.718516	0.724828	0.736421	0.809796	0.762875	0.782014	0.712213	0.726933	0.822674	0.746985	0.759692	0.732202	0.650681	0.717465	0.736421	0.815157	0.782014	0.751217	0.750158	0.525963	0.484793	0.780948	0.732202	0.748042	0.766059	0.735366	0.74487	0.80337	0.718516	0.708016
71	states	0.735366	0.340646	0.550235	0.735366	0.735366	0.735366	0.735366	0.735366	0.735366	0.735366	0.735366	0.735366	0.735366	0.735366	0.735366	0.735366	0.735366	0.340646	0.735366	0.735366	0.735366	0.735366	0.735366	0.735366	0.735366	0.735366	0.735366	0.735366	0.735366	0.735366	0.735366	0.735366	0.735366	0.735366	0.735366	0.735366	0.735366	0.550235	0.550235	0.735366	0.735366	0.735366	0.735366	0.735366	0.735366	0.735366	0.735366	0.735366
71	clusters	0.691259	0.382257	0.691259	0.691259	0.691259	0.691259	0.691259	0.691259	0.691259	0.691259	0.691259	0.691259	0.691259	0.691259	0.691259	0.691259	0.691259	0.382257	0.691259	0.691259	0.691259	0.691259	0.691259	0.691259	0.691259	0.691259	0.691259	0.691259	0.691259	0.691259	0.691259	0.691259	0.691259	0.691259	0.691259	0.691259	0.691259	0.691259	0.691259	0.691259	0.691259	0.691259	0.691259	0.691259	0.691259	0.691259	0.691259	0.691259
72	fret	0.781332	0.594367	0.779442	0.771875	0.64229	0.717604	0.755752	0.600256	0.517055	0.426279	0.534011	0.773768	0.683954	0.771875	0.729076	0.689739	0.700325	0.54495	0.516056	0.751951	0.772821	0.670429	0.790771	0.535006	0.738621	0.769034	0.748146	0.722383	0.730031	0.708009	0.715688	0.734805	0.81991	0.603201	0.730987	0.721426	0.580577	0.634498	0.626693	0.777552	0.746243	0.705129	0.729076	0.715688	0.77566	0.750049	0.648126	0.582549
72	states	0.727643	0.616918	0.727643	0.727643	0.616918	0.727643	0.727643	0.616918	0.397685	0.397685	0.616918	0.727643	0.727643	0.727643	0.727643	0.727643	0.727643	0.616918	0.616918	0.727643	0.727643	0.727643	0.727643	0.616918	0.727643	0.727643	0.727643	0.727643	0.727643	0.727643	0.727643	0.727643	0.727643	0.616918	0.727643	0.727643	0.616918	0.616918	0.616918	0.727643	0.727643	0.727643	0.727643	0.727643	0.727643	0.727643	0.616918	0.616918
72	clusters	0.691259	0.691259	0.691259	0.691259	0.691259	0.691259	0.691259	0.691259	0.382257	0.382257	0.691259	0.691259	0.691259	0.691259	0.691259	0.691259	0.691259	0.691259	0.691259	0.691259	0.691259	0.691259	0.691259	0.691259	0.691259	0.691259	0.691259	0.691259	0.691259	0.691259	0.691259	0.691259	0.691259	0.691259	0.691259	0.691259	0.691259	0.691259	0.691259	0.691259	0.691259	0.691259	0.691259	0.691259	0.691259	0.691259	0.691259	0.691259
73	fret	0.719337	0.733804	0.814022	0.70476	0.235123	0.31556	0.280816	0.296578	0.29882	0.679904	0.7311	0.730197	0.730197	0.742807	0.732001	0.759744	0.755297	0.779185	0.722058	0.733804	0.711151	0.737403	0.722058	0.701098	0.714794	0.679904	0.71024	0.692833	0.752623	0.733804	0.738302	0.697429	0.743703	0.755297	0.717521	0.658472	0.70476	0.732903	0.755297	0.72568	0.72568	0.697429	0.726584	0.787081	0.749053	0.702014	0.713884	0.741013
73	states	0.722058	0.722058	0.722058	0.722058	0.342068	0.342068	0.342068	0.342068	0.342068	0.722058	0.722058	0.722058	0.722058	0.722058	0.722058	0.722058	0.722058	0.722058	0.722058	0.722058	0.722058	0.722058	0.722058	0.722058	0.722058	0.722058	0.722058	0.722058	0.722058	0.722058	0.722058	0.722058	0.722058	0.722058	0.722058	0.722058	0.722058	0.722058	0.722058	0.722058	0.722058	0.722058	0.722058	0.722058	0.722058	0.722058	0.722058	0.722058
73	clusters	0.691259	0.691259	0.691259	0.691259	0.382257	0.382257	0.382257	0.382257	0.382257	0.691259	0.691259	0.691259	0.691259	0.691259	0.691259	0.691259	0.691259	0.691259	0.691259	0.691259	0.691259	0.691259	0.691259	0.691259	0.691259	0.691259	0.691259	0.691259	0.691259	0.691259	0.691259	0.691259	0.691259	0.691259	0.691259	0.691259	0.691259	0.691259	0.691259	0.691259	0.691259	0.691259	0.691259	0.691259	0.691259	0.691259	0.691259	0.691259
74	fret	0.728136	0.739375	0.771042	0.73563	0.751519	0.75897	0.742182	0.755247	0.280772	0.48162	0.730003	0.73188	0.711178	0.7074	0.343416	0.294672	0.321248	0.301069	0.465407	0.730003	0.73563	0.689395	0.701725	0.711178	0.599838	0.225707	0.313832	0.455235	0.740311	0.643469	0.755247	0.710234	0.725317	0.726257	0.657889	0.304263	0.675112	0.650206	0.723437	0.664597	0.67988	0.67988	0.43275
74	states	0.725317	0.725317	0.725317	0.725317	0.725317	0.725317	0.725317	0.725317	0.31754	0.31754	0.725317	0.725317	0.725317	0.725317	0.31754	0.31754	0.31754	0.31754	0.31754	0.725317	0.725317	0.725317	0.725317	0.725317	0.725317	0.31754	0.31754	0.31754	0.725317	0.725317	0.725317	0.725317	0.725317	0.725317	0.725317	0.31754	0.725317	0.725317	0.725317	0.725317	0.725317	0.725317	0.31754
74	clusters	0.691259	0.691259	0.691259	0.691259	0.691259	0.691259	0.691259	0.691259	0.382257	0.382257	0.691259	0.691259	0.691259	0.691259	0.382257	0.382257	0.382257	0.382257	0.382257	0.691259	0.691259	0.691259	0.691259	0.691259	0.691259	0.382257	0.382257	0.382257	0.691259	0.691259	0.691259	0.691259	0.691259	0.691259	0.691259	0.382257	0.691259	0.691259	0.691259	0.691259	0.691259	0.691259	0.382257
75	fret	0.381846	0.739333	0.735356	0.694568	0.725411	0.738339	0.64477	0.690586	0.658719	0.653738	0.651745	0.725411	0.709495	0.275403	0.67366	0.718448	0.724417	0.685608	0.698549	0.729389	0.765176	0.731378	0.741322	0.698549	0.691582	0.70054	0.75822	0.753251	0.737345	0.729389	0.753251	0.745299	0.707505	0.749275	0.792989	0.772131	0.699544	0.774118	0.754245	0.714469	0.731378	0.746293	0.80391	0.707505	0.523013	0.544995	0.774118	0.782065
75	states	0.340706	0.737345	0.737345	0.737345	0.737345	0.737345	0.737345	0.737345	0.737345	0.737345	0.737345	0.737345	0.737345	0.340706	0.737345	0.737345	0.737345	0.737345	0.737345	0.737345	0.737345	0.737345	0.737345	0.737345	0.737345	0.737345	0.737345	0.737345	0.737345	0.737345	0.737345	0.737345	0.737345	0.737345	0.737345	0.737345	0.737345	0.737345	0.737345	0.737345	0.737345	0.737345	0.737345	0.737345	0.340706	0.340706	0.737345	0.737345
75	clusters	0.382257	0.691259	0.691259	0.691259	0.691259	0.691259	0.691259	0.691259	0.691259	0.691259	0.691259	0.691259	0.691259	0.382257	0.691259	0.691259	0.691259	0.691259	0.691259	0.691259	0.691259	0.691259	0.691259	0.691259	0.691259	0.691259	0.691259	0.691259	0.691259	0.691259	0.691259	0.691259	0.691259	0.691259	0.691259	0.691259	0.691259	0.691259	0.691259	0.691259	0.691259	0.691259	0.691259	0.691259	0.382257	0.382257	0.691259	0.691259
76	fret	0.346103	0.461599	0.766455	0.755803	0.722786	0.745136	0.753864	0.82142	0.738341	0.700372	0.714023	0.758709	0.78868	0.756772	0.779025	0.722786	0.712074	0.759678	0.751926	0.816614	0.754834	0.774193	0.737369	0.735427	0.776126	0.743195	0.781923	0.726678	0.730567	0.76839	0.726678	0.792539	0.749016	0.699396	0.751926	0.776126	0.849237	0.799288	0.728623	0.795432	0.753864	0.751926	0.743195	0.71013	0.783854	0.721813	0.747076	0.699396
76	states	0.346103	0.346103	0.732511	0.732511	0.732511	0.732511	0.732511	0.732511	0.732511	0.732511	0.732511	0.732511	0.732511	0.732511	0.732511	0.732511	0.732511	0.732511	0.732511	0.732511	0.732511	0.732511	0.732511	0.732511	0.732511	0.732511	0.732511	0.732511	0.732511	0.732511	0.732511	0.732511	0.732511	0.732511	0.732511	0.732511	0.732511	0.732511	0.732511	0.732511	0.732511	0.732511	0.732511	0.732511	0.732511	0.732511	0.732511	0.732511
76	clusters	0.382257	0.382257	0.691259	0.691259	0.691259	0.691259	0.691259	0.691259	0.691259	0.691259	0.691259	0.691259	0.691259	0.691259	0.691259	0.691259	0.691259	0.691259	0.691259	0.691259	0.691259	0.691259	0.691259	0.691259	0.691259	0.691259	0.691259	0.691259	0.691259	0.691259	0.691259	0.691259	0.691259	0.691259	0.691259	0.691259	0.691259	0.691259	0.691259	0.691259	0.691259	0.691259	0.691259	0.691259	0.691259	0.691259	0.691259	0.691259
77	fret	0.812294	0.724453	0.793088	0.698255	0.710343	0.763797	0.776923	0.704298	0.490541	0.389749	0.711351	0.741596	0.715382	0.754712	0.794098	0.713366	0.826456	0.8548	0.718405	0.68919	0.715382	0.66705	0.428625	0.751685	0.717397	0.749667	0.767835	0.707321	0.720421	0.730502	0.431618	0.349931	0.717397	0.75875	0.725461	0.775913	0.664032	0.821398	0.707321	0.714374	0.687177	0.710343	0.684157	0.778943	0.730502	0.737561	0.527556	0.750676
77	states	0.737057	0.737057	0.737057	0.737057	0.737057	0.737057	0.737057	0.737057	0.405692	0.405692	0.737057	0.737057	0.737057	0.737057	0.737057	0.737057	0.737057	0.737057	0.737057	0.737057	0.737057	0.737057	0.405692	0.737057	0.737057	0.737057	0.737057	0.737057	0.737057	0.737057	0.405692	0.405692	0.737057	0.737057	0.737057	0.737057	0.737057	0.737057	0.737057	0.737057	0.737057	0.737057	0.737057	0.737057	0.737057	0.737057	0.405692	0.737057
77	clusters	0.691259	0.691259	0.691259	0.691259	0.691259	0.691259	0.691259	0.691259	0.382257	0.382257	0.691259	0.691259	0.691259	0.691259	0.691259	0.691259	0.691259	0.691259	0.691259	0.691259	0.691259	0.691259	0.382257	0.691259	0.691259	0.691259	0.691259	0.691259	0.691259	0.691259	0.382257	0.382257	0.691259	0.691259	0.691259	0.691259	0.691259	0.691259	0.691259	0.691259	0.691259	0.691259	0.691259	0.691259	0.691259	0.691259	0.382257	0.691259
78	fret	0.72438	0.774468	0.736182	0.659283	0.767604	0.390692	0.729299	0.746992	0.735199	0.703704	0.721428	0.557065	0.436999	0.702718	0.452065	0.677068	0.721428	0.322964	0.267116	0.464106	0.693843	0.705675	0.674105	0.723396	0.748956	0.7627	0.747974	0.772508	0.691871	0.662249	0.642465	0.725364	0.757793	0.254901	0.682004	0.612735	0.756811	0.747974	0.800911	0.731266	0.760737	0.781329	0.796018	0.669167	0.652361	0.496163	0.690884	0.668179
78	states	0.719951	0.719951	0.719951	0.719951	0.719951	0.344732	0.719951	0.719951	0.719951	0.719951	0.719951	0.344732	0.344732	0.719951	0.344732	0.719951	0.719951	0.344732	0.344732	0.344732	0.719951	0.719951	0.719951	0.719951	0.719951	0.719951	0.719951	0.719951	0.719951	0.719951	0.719951	0.719951	0.719951	0.344732	0.719951	0.719951	0.719951	0.719951	0.719951	0.719951	0.719951	0.719951	0.719951	0.719951	0.719951	0.344732	0.719951	0.719951
78	clusters	0.691259	0.691259	0.691259	0.691259	0.691259	0.382257	0.691259	0.691259	0.691259	0.691259	0.691259	0.382257	0.382257	0.691259	0.382257	0.691259	0.691259	0.382257	0.382257	0.382257	0.691259	0.691259	0.691259	0.691259	0.691259	0.691259	0.691259	0.691259	0.691259	0.691259	0.691259	0.691259	0.691259	0.382257	0.691259	0.691259	0.691259	0.691259	0.691259	0.691259	0.691259	0.691259	0.691259	0.691259	0.691259	0.382257	0.691259	0.691259
79	fret	0.618941	0.601375	0.669633	0.611881	0.669633	0.670868	0.693325	0.680795	0.64642	0.667167	0.592118	0.640389	0.656137	0.628423	0.648842	0.667167	0.716226	0.64642	0.702177	0.648842	0.730404	0.644004	0.582908	0.664707	0.629614	0.630806	0.630806	0.599054	0.658579	0.665936	0.627234	0.299089	0.255003	0.500433	0.618941	0.628423	0.662252	0.589816	0.288743	0.593271	0.635588	0.622487	0.636786	0.699641	0.632	0.622487	0.635588	0.669633
79	states	0.640389	0.640389	0.640389	0.640389	0.640389	0.640389	0.640389	0.640389	0.640389	0.640389	0.640389	0.640389	0.640389	0.640389	0.640389	0.640389	0.640389	0.640389	0.640389	0.640389	0.640389	0.640389	0.640389	0.640389	0.640389	0.640389	0.640389	0.640389	0.640389	0.640389	0.640389	0.299089	0.299089	0.299089	0.640389	0.640389	0.640389	0.640389	0.299089	0.640389	0.640389	0.640389	0.640389	0.640389	0.640389	0.640389	0.640389	0.640389
79	clusters	0.691259	0.691259	0.691259	0.691259	0.691259	0.691259	0.691259	0.691259	0.691259	0.691259	0.691259	0.691259	0.691259	0.691259	0.691259	0.691259	0.691259	0.691259	0.691259	0.691259	0.691259	0.691259	0.691259	0.691259	0.691259	0.691259	0.691259	0.691259	0.691259	0.691259	0.691259	0.382257	0.382257	0.382257	0.691259	0.691259	0.691259	0.691259	0.382257	0.691259	0.691259	0.691259	0.691259	0.691259	0.691259	0.691259	0.691259	0.691259
80	fret	0.762898	0.758135	0.73042	0.740951	0.759088	0.73521	0.634655	0.0296546	0.316499	0.512123	0.748595	0.74573	0.760993	0.741907	0.766705	0.77431	0.744774	0.726586	0.77241	0.740951	0.723708	0.759088	0.740951	0.76004	0.74764	0.729462	0.720829	0.42947	0.675503	0.755275	0.750504	0.753367	0.591515
80	states	0.74764	0.74764	0.74764	0.74764	0.74764	0.74764	0.551819	0.551819	0.551819	0.551819	0.74764	0.74764	0.74764	0.74764	0.74764	0.74764	0.74764	0.74764	0.74764	0.74764	0.74764	0.74764	0.74764	0.551819	0.74764	0.74764	0.74764	0.551819	0.551819	0.74764	0.74764	0.74764	0.551819
80	clusters	0.691259	0.691259	0.691259	0.691259	0.691259	0.691259	0.691259	0.691259	0.691259	0.691259	0.691259	0.691259	0.691259	0.691259	0.691259	0.691259	0.691259	0.691259	0.691259	0.691259	0.691259	0.691259	0.691259	0.691259	0.691259	0.691259	0.691259	0.691259	0.691259	0.691259	0.691259	0.691259	0.691259
81	fret	0.684784	0.773128	0.722862	0.613843	0.24529	0.287795	0.300164	0.485694	0.710129	0.729244	0.750591	0.764527	0.705893	0.790385	0.739903	0.774205	0.709069	0.738836	0.763454	0.693214	0.774205	0.764527	0.758089	0.788224	0.743106	0.755945	0.76238	0.538064	0.365532	0.722862	0.694269	0.681627	0.76238	0.513809	0.331746	0.348119	0.485694	0.742038	0.723925	0.733504	0.743106	0.750591	0.665872	0.826213	0.743106	0.744175	0.732438	0.760234
81	states	0.738302	0.738302	0.738302	0.47671	0.47671	0.47671	0.47671	0.47671	0.738302	0.738302	0.738302	0.738302	0.738302	0.738302	0.738302	0.738302	0.738302	0.738302	0.738302	0.738302	0.738302	0.738302	0.738302	0.738302	0.738302	0.738302	0.738302	0.47671	0.47671	0.738302	0.738302	0.738302	0.738302	0.47671	0.47671	0.47671	0.47671	0.738302	0.738302	0.738302	0.738302	0.738302	0.738302	0.738302	0.738302	0.738302	0.738302	0.738302
81	clusters	0.691259	0.691259	0.691259	0.382257	0.382257	0.382257	0.382257	0.382257	0.691259	0.691259	0.691259	0.691259	0.691259	0.691259	0.691259	0.691259	0.691259	0.691259	0.691259	0.691259	0.691259	0.691259	0.691259	0.691259	0.691259	0.691259	0.691259	0.382257	0.382257	0.691259	0.691259	0.691259	0.691259	0.382257	0.382257	0.382257	0.382257	0.691259	0.691259	0.691259	0.691259	0.691259	0.691259	0.691259	0.691259	0.691259	0.691259	0.691259
82	fret	0.722271	0.733636	0.705772	0.710924	0.715048	0.648316	0.684173	0.688282	0.732602	0.664686	0.74709	0.742948	0.717111	0.809509	0.706802	0.686227	0.716079	0.739843	0.741913	0.550862	0.706802	0.732602	0.653428	0.712986	0.670834	0.6852	0.663661	0.706802	0.712986	0.315789	0.667759	0.720207	0.671859	0.749162	0.736739	0.742948	0.719175	0.668784	0.695478	0.707832	0.723304	0.714017	0.422947	0.484623	0.763683	0.697536	0.678008	0.728468
82	states	0.707832	0.707832	0.707832	0.707832	0.707832	0.707832	0.707832	0.707832	0.707832	0.707832	0.707832	0.707832	0.707832	0.707832	0.707832	0.707832	0.707832	0.707832	0.707832	0.707832	0.707832	0.707832	0.707832	0.707832	0.707832	0.707832	0.707832	0.707832	0.707832	0.325553	0.707832	0.707832	0.707832	0.707832	0.707832	0.707832	0.707832	0.707832	0.707832	0.707832	0.707832	0.707832	0.325553	0.325553	0.707832	0.707832	0.707832	0.707832
82	clusters	0.691259	0.691259	0.691259	0.691259	0.691259	0.691259	0.691259	0.691259	0.691259	0.691259	0.691259	0.691259	0.691259	0.691259	0.691259	0.691259	0.691259	0.691259	0.691259	0.691259	0.691259	0.691259	0.691259	0.691259	0.691259	0.691259	0.691259	0.691259	0.691259	0.382257	0.691259	0.691259	0.691259	0.691259	0.691259	0.691259	0.691259	0.691259	0.691259	0.691259	0.691259	0.691259	0.382257	0.382257	0.691259	0.691259	0.691259	0.691259
[truncated: 1,107 more columns]

## Sheet: 242-431_intra_liposome
1	fret	0.261088	0.339834	0.320117	0.236651	0.273866	0.382677	0.60347	0.668868	0.272951	0.315449	0.290406	0.330423	0.340777	0.315449	0.322923	0.304283	0.283959	0.273866	0.275698	0.317315	0.327608	0.32386	0.285799	0.336065	0.413646	0.347391	0.345499	0.262909	0.311721	0.273866	0.406835	0.401013	0.293174	0.321052	0.354973	0.261998	0.312652	0.307999	0.346445	0.366395	0.363534	0.22767	0.272951	0.348337	0.290406	0.259268	0.296865	0.303356
1	states	0.309859	0.309859	0.309859	0.309859	0.309859	0.421454	0.661272	0.661272	0.309859	0.309859	0.309859	0.309859	0.309859	0.309859	0.309859	0.309859	0.309859	0.309859	0.309859	0.309859	0.309859	0.309859	0.309859	0.309859	0.421454	0.309859	0.309859	0.309859	0.309859	0.309859	0.421454	0.421454	0.309859	0.309859	0.309859	0.309859	0.309859	0.309859	0.309859	0.309859	0.309859	0.309859	0.309859	0.309859	0.309859	0.309859	0.309859	0.309859
1	clusters	0.325562	0.325562	0.325562	0.325562	0.325562	0.325562	0.664181	0.664181	0.325562	0.325562	0.325562	0.325562	0.325562	0.325562	0.325562	0.325562	0.325562	0.325562	0.325562	0.325562	0.325562	0.325562	0.325562	0.325562	0.325562	0.325562	0.325562	0.325562	0.325562	0.325562	0.325562	0.325562	0.325562	0.325562	0.325562	0.325562	0.325562	0.325562	0.325562	0.325562	0.325562	0.325562	0.325562	0.325562	0.325562	0.325562	0.325562	0.325562
2	fret	0.300824	0.260736	0.0944067	0.237349	0.202378	0.264639	0.185909	0.373613	0.479862	0.229566	0.559076	0.693945	0.644036	0.729754	0.511871	0.351914	0.495853	0.524905	0.528919	0.293967	0.491853	0.430065	0.522898	0.727704	0.675581	0.652167	0.489853	0.371638	0.344036	0.667431	0.462902	0.346005	0.427085	0.350929	0.433045	0.478864	0.462902	0.407245	0.404273	0.445971	0.619686	0.358813	0.475869	0.459912	0.382504	0.462902	0.311608	0.55203
2	states	0.249042	0.249042	0.249042	0.249042	0.249042	0.249042	0.249042	0.249042	0.249042	0.249042	0.671506	0.671506	0.671506	0.671506	0.433045	0.433045	0.433045	0.433045	0.433045	0.433045	0.433045	0.433045	0.433045	0.671506	0.671506	0.671506	0.433045	0.433045	0.433045	0.671506	0.433045	0.433045	0.433045	0.433045	0.433045	0.433045	0.433045	0.433045	0.433045	0.433045	0.671506	0.433045	0.433045	0.433045	0.433045	0.433045	0.433045	0.433045
2	clusters	0.325562	0.325562	0.325562	0.325562	0.325562	0.325562	0.325562	0.325562	0.325562	0.325562	0.664181	0.664181	0.664181	0.664181	0.325562	0.325562	0.325562	0.325562	0.325562	0.325562	0.325562	0.325562	0.325562	0.664181	0.664181	0.664181	0.325562	0.325562	0.325562	0.664181	0.325562	0.325562	0.325562	0.325562	0.325562	0.325562	0.325562	0.325562	0.325562	0.325562	0.664181	0.325562	0.325562	0.325562	0.325562	0.325562	0.325562	0.325562
3	fret	0.661404	0.771161	0.717562	0.509543	0.391415	0.326097	0.268322	0.285586	0.655202	0.759554	0.747972	0.363041	0.380634	0.288469	0.63561	0.532694	0.280784	0.393378	0.254936	0.26928	0.250164	0.373785	0.309662	0.279825	0.715471	0.266405	0.353293	0.393378	0.296165	0.338707	0.290392	0.363041	0.329976	0.455598	0.34065	0.298091	0.804003	0.385528	0.317391	0.306767	0.649007	0.365969	0.351346	0.358165	0.374762	0.338707	0.308697	0.509543
3	states	0.66709	0.66709	0.66709	0.66709	0.333855	0.333855	0.333855	0.333855	0.66709	0.66709	0.66709	0.333855	0.333855	0.333855	0.66709	0.66709	0.333855	0.333855	0.333855	0.333855	0.333855	0.333855	0.333855	0.333855	0.66709	0.333855	0.333855	0.333855	0.333855	0.333855	0.333855	0.333855	0.333855	0.333855	0.333855	0.333855	0.66709	0.333855	0.333855	0.333855	0.66709	0.333855	0.333855	0.333855	0.333855	0.333855	0.333855	0.66709
3	clusters	0.664181	0.664181	0.664181	0.664181	0.325562	0.325562	0.325562	0.325562	0.664181	0.664181	0.664181	0.325562	0.325562	0.325562	0.664181	0.664181	0.325562	0.325562	0.325562	0.325562	0.325562	0.325562	0.325562	0.325562	0.664181	0.325562	0.325562	0.325562	0.325562	0.325562	0.325562	0.325562	0.325562	0.325562	0.325562	0.325562	0.664181	0.325562	0.325562	0.325562	0.664181	0.325562	0.325562	0.325562	0.325562	0.325562	0.325562	0.664181
4	fret	0.298753	0.341295	0.291251	0.331771	0.327529	0.205391	0.305169	0.301963	0.549007	0.552968	0.36446	0.378072	0.299823	0.343408	0.294468	0.407197	0.313705	0.334949	0.581535	0.747681	0.774526	0.482934	0.590349	0.757891	0.52414	0.36446	0.277274	0.199882	0.292324	0.329651	0.36446	0.25457	0.395786	0.263238	0.277274	0.441192	0.741166	0.554946	0.30944	0.283732	0.290178	0.289105	0.36026	0.267563	0.340238	0.342352	0.268643	0.33389
4	states	0.320093	0.320093	0.320093	0.320093	0.320093	0.320093	0.320093	0.320093	0.590349	0.590349	0.320093	0.320093	0.320093	0.320093	0.320093	0.320093	0.320093	0.320093	0.590349	0.590349	0.590349	0.590349	0.590349	0.590349	0.590349	0.320093	0.320093	0.320093	0.320093	0.320093	0.320093	0.320093	0.320093	0.320093	0.320093	0.320093	0.590349	0.590349	0.320093	0.320093	0.320093	0.320093	0.320093	0.320093	0.320093	0.320093	0.320093	0.320093
4	clusters	0.325562	0.325562	0.325562	0.325562	0.325562	0.325562	0.325562	0.325562	0.664181	0.664181	0.325562	0.325562	0.325562	0.325562	0.325562	0.325562	0.325562	0.325562	0.664181	0.664181	0.664181	0.664181	0.664181	0.664181	0.664181	0.325562	0.325562	0.325562	0.325562	0.325562	0.325562	0.325562	0.325562	0.325562	0.325562	0.325562	0.664181	0.664181	0.325562	0.325562	0.325562	0.325562	0.325562	0.325562	0.325562	0.325562	0.325562	0.325562
5	fret	0.262455	0.358788	0.207461	0.28049	0.368516	0.726766	0.738553	0.715839	0.259057	0.253383	0.215565	0.57891	0.271491	0.3392	0.484	0.221336	0.271491	0.271491	0.178277	0.313914
5	states	0.271491	0.271491	0.271491	0.271491	0.271491	0.726766	0.726766	0.726766	0.271491	0.271491	0.271491	0.271491	0.271491	0.271491	0.271491	0.271491	0.271491	0.271491	0.271491	0.271491
5	clusters	0.325562	0.325562	0.325562	0.325562	0.325562	0.664181	0.664181	0.664181	0.325562	0.325562	0.325562	0.325562	0.325562	0.325562	0.325562	0.325562	0.325562	0.325562	0.325562	0.325562
6	fret	0.296879	0.315994	0.253135	0.267289	0.320578	0.344624	0.295975	0.377557	0.339963	0.368081	0.335334	0.270847	0.375657	0.305954	0.330709	0.284252	0.239978	0.338116	0.351159	0.320578	0.295071	0.31966	0.338116	0.31691	0.289656	0.31691	0.329785	0.6712	0.768198	0.271738	0.305954	0.355842	0.308686	0.737642	0.555747	0.327018
6	states	0.318285	0.318285	0.318285	0.318285	0.318285	0.318285	0.318285	0.318285	0.318285	0.318285	0.318285	0.318285	0.318285	0.318285	0.318285	0.318285	0.318285	0.318285	0.318285	0.318285	0.318285	0.318285	0.318285	0.318285	0.318285	0.318285	0.318285	0.704421	0.704421	0.318285	0.318285	0.318285	0.318285	0.704421	0.704421	0.318285
6	clusters	0.325562	0.325562	0.325562	0.325562	0.325562	0.325562	0.325562	0.325562	0.325562	0.325562	0.325562	0.325562	0.325562	0.325562	0.325562	0.325562	0.325562	0.325562	0.325562	0.325562	0.325562	0.325562	0.325562	0.325562	0.325562	0.325562	0.325562	0.664181	0.664181	0.325562	0.325562	0.325562	0.325562	0.664181	0.664181	0.325562
7	fret	0.345259	0.27709	0.276121	0.295525	0.238445	0.288727	0.318884	0.461752	0.264506	0.25098	0.283876	0.307194	0.312062	0.326688	0.350155	0.325712	0.27709	0.518746	0.326688	0.349175	0.337433	0.248085	0.333524	0.275153	0.264506	0.316934	0.69057	0.637243	0.330591	0.232667	0.353094	0.294554	0.340367	0.326688	0.300385	0.288727	0.27709	0.547923	0.279028	0.253876	0.276121	0.59041	0.54994	0.281937	0.285816	0.415112	0.285816	0.312062
7	states	0.311575	0.311575	0.311575	0.311575	0.311575	0.311575	0.311575	0.466732	0.311575	0.311575	0.311575	0.311575	0.311575	0.311575	0.311575	0.311575	0.311575	0.466732	0.311575	0.311575	0.311575	0.311575	0.311575	0.311575	0.311575	0.311575	0.66283	0.66283	0.311575	0.311575	0.311575	0.311575	0.311575	0.311575	0.311575	0.311575	0.311575	0.466732	0.311575	0.311575	0.311575	0.66283	0.466732	0.311575	0.311575	0.311575	0.311575	0.311575
7	clusters	0.325562	0.325562	0.325562	0.325562	0.325562	0.325562	0.325562	0.325562	0.325562	0.325562	0.325562	0.325562	0.325562	0.325562	0.325562	0.325562	0.325562	0.325562	0.325562	0.325562	0.325562	0.325562	0.325562	0.325562	0.325562	0.325562	0.664181	0.664181	0.325562	0.325562	0.325562	0.325562	0.325562	0.325562	0.325562	0.325562	0.325562	0.325562	0.325562	0.325562	0.325562	0.664181	0.325562	0.325562	0.325562	0.325562	0.325562	0.325562
8	fret	0.225998	0.358752	0.386594	0.826767	0.722464	0.773035	0.762912	0.320032	0.234889	0.353784	0.300201	0.241807	0.350804	0.388584	0.375652	0.231925	0.28534	0.387589	0.280388	0.287321	0.196386	0.274449	0.335909	0.356765	0.368692	0.250704	0.374657	0.226985	0.313089	0.247738	0.330946	0.37068	0.755828	0.357758	0.692175	0.343851	0.41746	0.328961	0.415467	0.274449	0.349811	0.321023	0.247738	0.30714	0.175683	0.350804	0.323008	0.342858
8	states	0.321023	0.321023	0.321023	0.753804	0.753804	0.753804	0.753804	0.321023	0.321023	0.321023	0.321023	0.321023	0.321023	0.321023	0.321023	0.321023	0.321023	0.321023	0.321023	0.321023	0.321023	0.321023	0.321023	0.321023	0.321023	0.321023	0.321023	0.321023	0.321023	0.321023	0.321023	0.321023	0.753804	0.321023	0.753804	0.321023	0.321023	0.321023	0.321023	0.321023	0.321023	0.321023	0.321023	0.321023	0.321023	0.321023	0.321023	0.321023
8	clusters	0.325562	0.325562	0.325562	0.664181	0.664181	0.664181	0.664181	0.325562	0.325562	0.325562	0.325562	0.325562	0.325562	0.325562	0.325562	0.325562	0.325562	0.325562	0.325562	0.325562	0.325562	0.325562	0.325562	0.325562	0.325562	0.325562	0.325562	0.325562	0.325562	0.325562	0.325562	0.325562	0.664181	0.325562	0.664181	0.325562	0.325562	0.325562	0.325562	0.325562	0.325562	0.325562	0.325562	0.325562	0.325562	0.325562	0.325562	0.325562
9	fret	0.272675	0.297093	0.345148	0.319617	0.338267	0.242494	0.282435	0.268776	0.312756	0.2717	0.610682	0.565199	0.32354	0.288295	0.246382	0.267801	0.263903	0.558141	0.344165	0.554113	0.67271	0.640117	0.407321	0.473926	0.382597	0.324521	0.289272	0.291227	0.275603	0.515936	0.548077	0.292204	0.383585	0.303942	0.432115	0.222106	0.24541	0.300028	0.287318	0.642151	0.722848	0.557134	0.217259	0.296115	0.682915	0.697232	0.23278	0.413266
9	states	0.297093	0.297093	0.297093	0.297093	0.297093	0.297093	0.297093	0.297093	0.297093	0.297093	0.6254	0.6254	0.297093	0.297093	0.297093	0.297093	0.297093	0.6254	0.297093	0.6254	0.6254	0.6254	0.297093	0.6254	0.297093	0.297093	0.297093	0.297093	0.297093	0.6254	0.6254	0.297093	0.297093	0.297093	0.297093	0.297093	0.297093	0.297093	0.297093	0.6254	0.6254	0.6254	0.297093	0.297093	0.6254	0.6254	0.297093	0.297093
9	clusters	0.325562	0.325562	0.325562	0.325562	0.325562	0.325562	0.325562	0.325562	0.325562	0.325562	0.664181	0.664181	0.325562	0.325562	0.325562	0.325562	0.325562	0.664181	0.325562	0.664181	0.664181	0.664181	0.325562	0.664181	0.325562	0.325562	0.325562	0.325562	0.325562	0.664181	0.664181	0.325562	0.325562	0.325562	0.325562	0.325562	0.325562	0.325562	0.325562	0.664181	0.664181	0.664181	0.325562	0.325562	0.664181	0.664181	0.325562	0.325562
10	fret	0.271805	0.247878	0.264051	0.243656	0.252115	0.232752	0.212059	0.174165	0.191749	0.278732	0.163902	0.21288	0.299759	0.346631	0.330199	0.229417	0.177342	0.237772	0.206341	0.175752	0.221123	0.253814	0.325674	0.224433	0.588184	0.583746	0.3393	0.241131	0.270079	0.188531	0.242814	0.223605	0.224433	0.163902	0.21453	0.242814	0.262337	0.251266	0.2445	0.238611	0.170997	0.178137	0.220296	0.229417	0.225262	0.203896	0.286573	0.197402
10	states	0.229417	0.229417	0.229417	0.229417	0.229417	0.229417	0.229417	0.229417	0.229417	0.229417	0.229417	0.229417	0.229417	0.357295	0.357295	0.229417	0.229417	0.229417	0.229417	0.229417	0.229417	0.229417	0.357295	0.229417	0.599319	0.599319	0.357295	0.229417	0.229417	0.229417	0.229417	0.229417	0.229417	0.229417	0.229417	0.229417	0.229417	0.229417	0.229417	0.229417	0.229417	0.229417	0.229417	0.229417	0.229417	0.229417	0.229417	0.229417
10	clusters	0.325562	0.325562	0.325562	0.325562	0.325562	0.325562	0.325562	0.325562	0.325562	0.325562	0.325562	0.325562	0.325562	0.325562	0.325562	0.325562	0.325562	0.325562	0.325562	0.325562	0.325562	0.325562	0.325562	0.325562	0.664181	0.664181	0.325562	0.325562	0.325562	0.325562	0.325562	0.325562	0.325562	0.325562	0.325562	0.325562	0.325562	0.325562	0.325562	0.325562	0.325562	0.325562	0.325562	0.325562	0.325562	0.325562	0.325562	0.325562
11	fret	0.266638	0.283386	0.279656	0.303995	0.308694	0.300236	0.297421	0.265711	0.316244	0.259227	0.285254	0.295546	0.297421	0.296483	0.27314	0.286188	0.27314	0.287122	0.293671	0.270351	0.277793	0.280588	0.294608	0.296483	0.283386	0.289927
11	states	0.286655	0.286655	0.286655	0.286655	0.286655	0.286655	0.286655	0.286655	0.286655	0.286655	0.286655	0.286655	0.286655	0.286655	0.286655	0.286655	0.286655	0.286655	0.286655	0.286655	0.286655	0.286655	0.286655	0.286655	0.286655	0.286655
11	clusters	0.325562	0.325562	0.325562	0.325562	0.325562	0.325562	0.325562	0.325562	0.325562	0.325562	0.325562	0.325562	0.325562	0.325562	0.325562	0.325562	0.325562	0.325562	0.325562	0.325562	0.325562	0.325562	0.325562	0.325562	0.325562	0.325562
12	fret	0.333882	0.386818	0.148146	0.295916	0.294946	0.632511	0.776064	0.773976	0.60193	0.718893	0.336811	0.224486	0.244677	0.172857	0.275565	0.227367	0.348543	0.616184	0.624342	0.141509	0.72407	0.85376	0.798022	0.569465	0.296887	0.242751	0.230249	0.328999	0.172857	0.370106	0.283311	0.142457	0.271696	0.467036	0.312438	0.229288	0.212977	0.267827	0.274598	0.133931	0.203402	0.367161	0.195752	0.336811	0.286217	0.240826	0.328024	0.337788
12	states	0.282342	0.282342	0.282342	0.282342	0.282342	0.674529	0.674529	0.674529	0.674529	0.674529	0.282342	0.282342	0.282342	0.282342	0.282342	0.282342	0.282342	0.674529	0.674529	0.282342	0.674529	0.674529	0.674529	0.674529	0.282342	0.282342	0.282342	0.282342	0.282342	0.282342	0.282342	0.282342	0.282342	0.282342	0.282342	0.282342	0.282342	0.282342	0.282342	0.282342	0.282342	0.282342	0.282342	0.282342	0.282342	0.282342	0.282342	0.282342
12	clusters	0.325562	0.325562	0.325562	0.325562	0.325562	0.664181	0.664181	0.664181	0.664181	0.664181	0.325562	0.325562	0.325562	0.325562	0.325562	0.325562	0.325562	0.664181	0.664181	0.325562	0.664181	0.664181	0.664181	0.664181	0.325562	0.325562	0.325562	0.325562	0.325562	0.325562	0.325562	0.325562	0.325562	0.325562	0.325562	0.325562	0.325562	0.325562	0.325562	0.325562	0.325562	0.325562	0.325562	0.325562	0.325562	0.325562	0.325562	0.325562
13	fret	0.268857	0.277492	0.301555	0.271734	0.477188	0.648596	0.57184	0.396975	0.270775	0.262151	0.348071	0.57184	0.262151	0.335432	0.310245	0.339318	0.625966	0.616736	0.785371	0.755842	0.597303	0.350019	0.292879	0.293842	0.264064	0.281335	0.215453	0.30445	0.365624	0.257367	0.441386	0.719158	0.708723	0.706638	0.546495	0.262151	0.243039	0.204082	0.309278	0.32282	0.450314	0.677532	0.326696	0.307346	0.244947	0.33349	0.281335	0.289991
13	states	0.292879	0.292879	0.292879	0.292879	0.616736	0.616736	0.616736	0.292879	0.292879	0.292879	0.292879	0.616736	0.292879	0.292879	0.292879	0.292879	0.616736	0.616736	0.616736	0.616736	0.616736	0.292879	0.292879	0.292879	0.292879	0.292879	0.292879	0.292879	0.292879	0.292879	0.616736	0.616736	0.616736	0.616736	0.616736	0.292879	0.292879	0.292879	0.292879	0.292879	0.616736	0.616736	0.292879	0.292879	0.292879	0.292879	0.292879	0.292879
13	clusters	0.325562	0.325562	0.325562	0.325562	0.664181	0.664181	0.664181	0.325562	0.325562	0.325562	0.325562	0.664181	0.325562	0.325562	0.325562	0.325562	0.664181	0.664181	0.664181	0.664181	0.664181	0.325562	0.325562	0.325562	0.325562	0.325562	0.325562	0.325562	0.325562	0.325562	0.664181	0.664181	0.664181	0.664181	0.664181	0.325562	0.325562	0.325562	0.325562	0.325562	0.664181	0.664181	0.325562	0.325562	0.325562	0.325562	0.325562	0.325562
14	fret	0.24959	0.312797	0.261244	0.456916	0.328461	0.279196	0.316979	0.220858	0.313843	0.225126	0.379255	0.244283	0.416211	0.289723	0.251712	0.24959	0.332629	0.319069	0.34511	0.401875	0.309661	0.427442	0.28762	0.276034	0.141172	0.254891	0.321158	0.313843	0.380286	0.321158	0.296028	0.334712	0.181188	0.22406	0.237907	0.348225	0.294978	0.341993	0.213379	0.251712	0.452862	0.359628	0.179034	0.403926	0.39058	0.361698	0.2091	0.279196
14	states	0.297602	0.297602	0.297602	0.297602	0.297602	0.297602	0.297602	0.297602	0.297602	0.297602	0.297602	0.297602	0.297602	0.297602	0.297602	0.297602	0.297602	0.297602	0.297602	0.297602	0.297602	0.297602	0.297602	0.297602	0.297602	0.297602	0.297602	0.297602	0.297602	0.297602	0.297602	0.297602	0.297602	0.297602	0.297602	0.297602	0.297602	0.297602	0.297602	0.297602	0.297602	0.297602	0.297602	0.297602	0.297602	0.297602	0.297602	0.297602
14	clusters	0.325562	0.325562	0.325562	0.325562	0.325562	0.325562	0.325562	0.325562	0.325562	0.325562	0.325562	0.325562	0.325562	0.325562	0.325562	0.325562	0.325562	0.325562	0.325562	0.325562	0.325562	0.325562	0.325562	0.325562	0.325562	0.325562	0.325562	0.325562	0.325562	0.325562	0.325562	0.325562	0.325562	0.325562	0.325562	0.325562	0.325562	0.325562	0.325562	0.325562	0.325562	0.325562	0.325562	0.325562	0.325562	0.325562	0.325562	0.325562
15	fret	0.364281	0.685923	0.616957	0.37384	0.32082	0.386327	0.360469	0.866119	0.673929	0.480688	0.367145	0.358557	0.3681	0.360469	0.39985	0.401788	0.351914	0.357606	0.390182	0.340558	0.468681	0.381516	0.381516	0.301247	0.491749	0.402758	0.40567	0.333018	0.370012	0.329258	0.456736
15	states	0.370012	0.679926	0.679926	0.370012	0.370012	0.370012	0.370012	0.679926	0.679926	0.370012	0.370012	0.370012	0.370012	0.370012	0.370012	0.370012	0.370012	0.370012	0.370012	0.370012	0.370012	0.370012	0.370012	0.370012	0.370012	0.370012	0.370012	0.370012	0.370012	0.370012	0.370012
15	clusters	0.325562	0.664181	0.664181	0.325562	0.325562	0.325562	0.325562	0.664181	0.664181	0.325562	0.325562	0.325562	0.325562	0.325562	0.325562	0.325562	0.325562	0.325562	0.325562	0.325562	0.325562	0.325562	0.325562	0.325562	0.325562	0.325562	0.325562	0.325562	0.325562	0.325562	0.325562
16	fret	0.253839	0.364833	0.356837	0.400758	0.387385	0.336108	0.270902	0.540057	0.635961	0.361417	0.58353	0.754666	0.709553	0.427133	0.36936	0.426044	0.406293	0.324465	0.420585	0.409604	0.320953	0.343051	0.220376	0.397426	0.391856	0.299709	0.379527	0.381777	0.463679	0.397426	0.263613	0.354548	0.28177	0.361417	0.375017	0.305641	0.319781	0.377274	0.310369	0.3829	0.352256	0.334948	0.302085	0.346509	0.309189	0.305641	0.495152	0.323295
16	states	0.350533	0.350533	0.350533	0.350533	0.350533	0.350533	0.350533	0.556027	0.556027	0.350533	0.556027	0.556027	0.556027	0.350533	0.350533	0.350533	0.350533	0.350533	0.350533	0.350533	0.350533	0.350533	0.350533	0.350533	0.350533	0.350533	0.350533	0.350533	0.350533	0.350533	0.350533	0.350533	0.350533	0.350533	0.350533	0.350533	0.350533	0.350533	0.350533	0.350533	0.350533	0.350533	0.350533	0.350533	0.350533	0.350533	0.350533	0.350533
16	clusters	0.325562	0.325562	0.325562	0.325562	0.325562	0.325562	0.325562	0.664181	0.664181	0.325562	0.664181	0.664181	0.664181	0.325562	0.325562	0.325562	0.325562	0.325562	0.325562	0.325562	0.325562	0.325562	0.325562	0.325562	0.325562	0.325562	0.325562	0.325562	0.325562	0.325562	0.325562	0.325562	0.325562	0.325562	0.325562	0.325562	0.325562	0.325562	0.325562	0.325562	0.325562	0.325562	0.325562	0.325562	0.325562	0.325562	0.325562	0.325562
17	fret	0.318045	0.30763	0.304796	0.297251	0.338983	0.293486	0.389056	0.45977	0.397806	0.454806	0.265396	0.361029	0.229269	0.343762	0.252373	0.334212	0.25888	0.247741	0.298193	0.237568	0.328496	0.328496	0.265396	0.328496	0.58858	0.323741	0.530101	0.345676	0.357183	0.323741	0.358144	0.381298	0.327544	0.272861	0.265396	0.545391	0.802698	0.670391	0.65554	0.667205	0.776239	0.701352	0.779535	0.740207	0.766372	0.728285	0.698135	0.729367
17	states	0.317571	0.317571	0.317571	0.317571	0.317571	0.317571	0.317571	0.498762	0.317571	0.498762	0.317571	0.317571	0.317571	0.317571	0.317571	0.317571	0.317571	0.317571	0.317571	0.317571	0.317571	0.317571	0.317571	0.317571	0.498762	0.317571	0.498762	0.317571	0.317571	0.317571	0.317571	0.317571	0.317571	0.317571	0.317571	0.498762	0.690642	0.690642	0.690642	0.690642	0.690642	0.690642	0.690642	0.690642	0.690642	0.690642	0.690642	0.690642
17	clusters	0.325562	0.325562	0.325562	0.325562	0.325562	0.325562	0.325562	0.664181	0.325562	0.664181	0.325562	0.325562	0.325562	0.325562	0.325562	0.325562	0.325562	0.325562	0.325562	0.325562	0.325562	0.325562	0.325562	0.325562	0.664181	0.325562	0.664181	0.325562	0.325562	0.325562	0.325562	0.325562	0.325562	0.325562	0.325562	0.664181	0.664181	0.664181	0.664181	0.664181	0.664181	0.664181	0.664181	0.664181	0.664181	0.664181	0.664181	0.664181
18	fret	0.433038	0.660738	0.277153	0.291907	0.45774	0.26158	0.740851	0.718646	0.836304	0.557115	0.353788	0.458733	0.24702	0.239775	0.263407	0.167701	0.306756	0.284518	0.388251	0.332034	0.29561	0.227152	0.308619	0.346198	0.63175	0.425187	0.278072	0.269811	0.232553	0.292832	0.188816	0.287286	0.267979	0.26432	0.76213	0.662899	0.252469	0.218178	0.25702	0.24158	0.401791	0.280832	0.623225	0.41346	0.290057	0.234357	0.281753	0.512994
18	states	0.582612	0.582612	0.281293	0.281293	0.582612	0.281293	0.582612	0.582612	0.582612	0.582612	0.281293	0.582612	0.281293	0.281293	0.281293	0.281293	0.281293	0.281293	0.281293	0.281293	0.281293	0.281293	0.281293	0.281293	0.582612	0.582612	0.281293	0.281293	0.281293	0.281293	0.281293	0.281293	0.281293	0.281293	0.582612	0.582612	0.281293	0.281293	0.281293	0.281293	0.281293	0.281293	0.582612	0.582612	0.281293	0.281293	0.281293	0.582612
18	clusters	0.664181	0.664181	0.325562	0.325562	0.664181	0.325562	0.664181	0.664181	0.664181	0.664181	0.325562	0.664181	0.325562	0.325562	0.325562	0.325562	0.325562	0.325562	0.325562	0.325562	0.325562	0.325562	0.325562	0.325562	0.664181	0.664181	0.325562	0.325562	0.325562	0.325562	0.325562	0.325562	0.325562	0.325562	0.664181	0.664181	0.325562	0.325562	0.325562	0.325562	0.325562	0.325562	0.664181	0.664181	0.325562	0.325562	0.325562	0.664181
19	fret	0.233775	0.175091	0.276117	0.186722	0.212858	0.271481	0.252101	0.205622	0.211953	0.33523	0.251182	0.265929	0.443658	0.674295	0.346641	0.314438	0.711022	0.667863	0.677517	0.713197	0.714286	0.574136	0.678592	0.372493	0.234689	0.258545	0.279831	0.218299	0.207429	0.235602	0.210142	0.387931	0.45653	0.404432	0.317263	0.455537	0.719733	0.222841	0.232862	0.537099	0.396654	0.233775	0.256702	0.19121	0.428882	0.377308	0.152868	0.183138
19	states	0.245672	0.245672	0.245672	0.245672	0.245672	0.245672	0.245672	0.245672	0.245672	0.245672	0.245672	0.245672	0.538632	0.538632	0.245672	0.245672	0.538632	0.538632	0.538632	0.538632	0.538632	0.538632	0.538632	0.245672	0.245672	0.245672	0.245672	0.245672	0.245672	0.245672	0.245672	0.538632	0.538632	0.538632	0.538632	0.538632	0.538632	0.245672	0.245672	0.538632	0.538632	0.245672	0.245672	0.245672	0.538632	0.245672	0.245672	0.245672
19	clusters	0.325562	0.325562	0.325562	0.325562	0.325562	0.325562	0.325562	0.325562	0.325562	0.325562	0.325562	0.325562	0.664181	0.664181	0.325562	0.325562	0.664181	0.664181	0.664181	0.664181	0.664181	0.664181	0.664181	0.325562	0.325562	0.325562	0.325562	0.325562	0.325562	0.325562	0.325562	0.664181	0.664181	0.664181	0.664181	0.664181	0.664181	0.325562	0.325562	0.664181	0.664181	0.325562	0.325562	0.325562	0.664181	0.325562	0.325562	0.325562
20	fret	0.895833	0.767926	0.850683	0.745529	0.66842	0.889668	0.851707	0.759777	0.922578	0.866059	0.893778	0.822023	0.756723	0.828159	0.734343	0.812819	0.697795	0.733327	0.850683	0.780157	0.685631	0.728246	0.80567	0.94834	0.825091	0.873241	0.883506	0.794439	0.9092	0.750616	0.908171	0.821	0.837369	0.747563	0.613878	0.781176	0.714028	0.711998	0.770982	0.694754	0.647185	0.300717	0.404686	0.19847	0.358055	0.384824	0.373912	0.832252
20	states	0.806691	0.806691	0.806691	0.806691	0.806691	0.806691	0.806691	0.806691	0.806691	0.806691	0.806691	0.806691	0.806691	0.806691	0.806691	0.806691	0.806691	0.806691	0.806691	0.806691	0.806691	0.806691	0.806691	0.806691	0.806691	0.806691	0.806691	0.806691	0.806691	0.806691	0.806691	0.806691	0.806691	0.806691	0.806691	0.806691	0.806691	0.806691	0.806691	0.806691	0.806691	0.365984	0.365984	0.365984	0.365984	0.365984	0.365984	0.806691
20	clusters	0.664181	0.664181	0.664181	0.664181	0.664181	0.664181	0.664181	0.664181	0.664181	0.664181	0.664181	0.664181	0.664181	0.664181	0.664181	0.664181	0.664181	0.664181	0.664181	0.664181	0.664181	0.664181	0.664181	0.664181	0.664181	0.664181	0.664181	0.664181	0.664181	0.664181	0.664181	0.664181	0.664181	0.664181	0.664181	0.664181	0.664181	0.664181	0.664181	0.664181	0.664181	0.325562	0.325562	0.325562	0.325562	0.325562	0.325562	0.664181
21	fret	0.289899	0.308843	0.250467	0.230927	0.334589	0.28141	0.275762	0.239287	0.417945	0.346096	0.319308	0.229999	0.244872	0.261685	0.283294	0.311689	0.274822	0.293679	0.349941	0.330762	0.318355	0.3022	0.347057	0.371165	0.300305	0.347057	0.335547	0.396423	0.398374	0.359572	0.288011	0.319308	0.288011	0.32694	0.277644	0.300305	0.372128	0.308843	0.36923
21	states	0.308843	0.308843	0.308843	0.308843	0.308843	0.308843	0.308843	0.308843	0.308843	0.308843	0.308843	0.308843	0.308843	0.308843	0.308843	0.308843	0.308843	0.308843	0.308843	0.308843	0.308843	0.308843	0.308843	0.308843	0.308843	0.308843	0.308843	0.308843	0.308843	0.308843	0.308843	0.308843	0.308843	0.308843	0.308843	0.308843	0.308843	0.308843	0.308843
21	clusters	0.325562	0.325562	0.325562	0.325562	0.325562	0.325562	0.325562	0.325562	0.325562	0.325562	0.325562	0.325562	0.325562	0.325562	0.325562	0.325562	0.325562	0.325562	0.325562	0.325562	0.325562	0.325562	0.325562	0.325562	0.325562	0.325562	0.325562	0.325562	0.325562	0.325562	0.325562	0.325562	0.325562	0.325562	0.325562	0.325562	0.325562	0.325562	0.325562
22	fret	0.720796	0.719777	0.29635	0.29635	0.350577	0.26393	0.303238	0.281603	0.278655	0.258045	0.325898	0.667939	0.377286	0.258045	0.142887	0.258045	0.248243	0.267855	0.165246	0.246283	0.239428	0.320968	0.670982	0.749352	0.772859	0.248243	0.336749	0.145801	0.1974	0.1974	0.240407	0.558881	0.23747	0.282585	0.315055	0.28062	0.467745	0.438844	0.687223	0.727929	0.315055	0.240407	0.28062	0.230619	0.251183	0.192523	0.334775	0.233555
22	states	0.589583	0.589583	0.289465	0.289465	0.289465	0.289465	0.289465	0.289465	0.289465	0.289465	0.289465	0.589583	0.589583	0.289465	0.289465	0.289465	0.289465	0.289465	0.289465	0.289465	0.289465	0.289465	0.589583	0.589583	0.589583	0.289465	0.289465	0.289465	0.289465	0.289465	0.289465	0.589583	0.289465	0.289465	0.289465	0.289465	0.589583	0.589583	0.589583	0.589583	0.289465	0.289465	0.289465	0.289465	0.289465	0.289465	0.289465	0.289465
22	clusters	0.664181	0.664181	0.325562	0.325562	0.325562	0.325562	0.325562	0.325562	0.325562	0.325562	0.325562	0.664181	0.664181	0.325562	0.325562	0.325562	0.325562	0.325562	0.325562	0.325562	0.325562	0.325562	0.664181	0.664181	0.664181	0.325562	0.325562	0.325562	0.325562	0.325562	0.325562	0.664181	0.325562	0.325562	0.325562	0.325562	0.664181	0.664181	0.664181	0.664181	0.325562	0.325562	0.325562	0.325562	0.325562	0.325562	0.325562	0.325562
23	fret	0.235781	0.599669	0.605839	0.310828	0.353231	0.523293	0.608928	0.285023	0.231078	0.24049	0.24049	0.259378	0.258431	0.273607	0.262219	0.592482	0.657609	0.557746	0.669075	0.579167	0.275507	0.309869	0.348391	0.294562	0.248036	0.270758	0.313705	0.232959	0.272657	0.369732	0.28979	0.324272	0.36876	0.43344	0.366816	0.244261	0.284071	0.554694	0.371678	0.23484	0.285976	0.307953	0.318501	0.268859	0.264117	0.273607	0.246148	0.260325
23	states	0.285023	0.648244	0.648244	0.285023	0.285023	0.458206	0.648244	0.285023	0.285023	0.285023	0.285023	0.285023	0.285023	0.285023	0.285023	0.648244	0.648244	0.648244	0.648244	0.648244	0.285023	0.285023	0.285023	0.285023	0.285023	0.285023	0.285023	0.285023	0.285023	0.285023	0.285023	0.285023	0.285023	0.458206	0.285023	0.285023	0.285023	0.458206	0.285023	0.285023	0.285023	0.285023	0.285023	0.285023	0.285023	0.285023	0.285023	0.285023
23	clusters	0.325562	0.664181	0.664181	0.325562	0.325562	0.325562	0.664181	0.325562	0.325562	0.325562	0.325562	0.325562	0.325562	0.325562	0.325562	0.664181	0.664181	0.664181	0.664181	0.664181	0.325562	0.325562	0.325562	0.325562	0.325562	0.325562	0.325562	0.325562	0.325562	0.325562	0.325562	0.325562	0.325562	0.325562	0.325562	0.325562	0.325562	0.325562	0.325562	0.325562	0.325562	0.325562	0.325562	0.325562	0.325562	0.325562	0.325562	0.325562
24	fret	0.325854	0.44124	0.27974	0.204854	0.299858	0.608607	0.305622	0.280696	0.268285	0.259712	0.669559	0.67268	0.715546	0.656067	0.70925	0.679977	0.644674	0.591188	0.686235	0.708202	0.648814	0.705057	0.597328	0.283565	0.270192	0.274009	0.286436	0.317172	0.308507	0.2322	0.258761	0.3191	0.298898	0.296019	0.286436	0.301778	0.274964	0.348117	0.265426	0.485018	0.728164	0.221808	0.299858	0.313319	0.18422	0.344238	0.306583	0.267332
24	states	0.30418	0.30418	0.30418	0.30418	0.30418	0.676852	0.30418	0.30418	0.30418	0.30418	0.676852	0.676852	0.676852	0.676852	0.676852	0.676852	0.676852	0.676852	0.676852	0.676852	0.676852	0.676852	0.676852	0.30418	0.30418	0.30418	0.30418	0.30418	0.30418	0.30418	0.30418	0.30418	0.30418	0.30418	0.30418	0.30418	0.30418	0.30418	0.30418	0.30418	0.676852	0.30418	0.30418	0.30418	0.30418	0.30418	0.30418	0.30418
24	clusters	0.325562	0.325562	0.325562	0.325562	0.325562	0.664181	0.325562	0.325562	0.325562	0.325562	0.664181	0.664181	0.664181	0.664181	0.664181	0.664181	0.664181	0.664181	0.664181	0.664181	0.664181	0.664181	0.664181	0.325562	0.325562	0.325562	0.325562	0.325562	0.325562	0.325562	0.325562	0.325562	0.325562	0.325562	0.325562	0.325562	0.325562	0.325562	0.325562	0.325562	0.664181	0.325562	0.325562	0.325562	0.325562	0.325562	0.325562	0.325562
25	fret	0.314197	0.391901	0.348042	0.218982	0.350088	0.354178	0.330627	0.315225	0.282256	0.185563	0.657282	0.30185	0.528844	0.690484	0.741924	0.66413	0.701192	0.713825	0.777609	0.711888	0.601259	0.424367	0.281223	0.107679	0.145674	0.266749	0.322417	0.320363	0.178232	0.268819	0.237712	0.265714	0.211685	0.318308	0.332678	0.358266	0.18661	0.310084	0.358266	0.311113	0.292576	0.310084	0.194978	0.523856	0.743858	0.647486	0.226272	0.303909
25	states	0.295668	0.295668	0.295668	0.295668	0.295668	0.295668	0.295668	0.295668	0.295668	0.295668	0.657282	0.295668	0.657282	0.657282	0.657282	0.657282	0.657282	0.657282	0.657282	0.657282	0.657282	0.295668	0.295668	0.295668	0.295668	0.295668	0.295668	0.295668	0.295668	0.295668	0.295668	0.295668	0.295668	0.295668	0.295668	0.295668	0.295668	0.295668	0.295668	0.295668	0.295668	0.295668	0.295668	0.657282	0.657282	0.657282	0.295668	0.295668
25	clusters	0.325562	0.325562	0.325562	0.325562	0.325562	0.325562	0.325562	0.325562	0.325562	0.325562	0.664181	0.325562	0.664181	0.664181	0.664181	0.664181	0.664181	0.664181	0.664181	0.664181	0.664181	0.325562	0.325562	0.325562	0.325562	0.325562	0.325562	0.325562	0.325562	0.325562	0.325562	0.325562	0.325562	0.325562	0.325562	0.325562	0.325562	0.325562	0.325562	0.325562	0.325562	0.325562	0.325562	0.664181	0.664181	0.664181	0.325562	0.325562
26	fret	0.761096	0.297256	0.30728	0.33534	0.320309	0.388429	0.298258	0.334338	0.323315	0.269182	0.477501	0.295251	0.30728	0.246115	0.317302	0.327324	0.333336	0.291241	0.315298	0.555486	0.579467	0.363391	0.390431	0.311289	0.28322	0.297256	0.522502	0.35137	0.333336	0.29926	0.332334	0.419465	0.5275	0.342354	0.352372	0.315298	0.317302	0.342354	0.354376	0.593453	0.308282	0.313293	0.3163	0.348365	0.320309	0.322313	0.355377	0.322313
26	states	0.747637	0.321311	0.321311	0.321311	0.321311	0.321311	0.321311	0.321311	0.321311	0.321311	0.536997	0.321311	0.321311	0.321311	0.321311	0.321311	0.321311	0.321311	0.321311	0.536997	0.536997	0.321311	0.321311	0.321311	0.321311	0.321311	0.536997	0.321311	0.321311	0.321311	0.321311	0.321311	0.536997	0.321311	0.321311	0.321311	0.321311	0.321311	0.321311	0.536997	0.321311	0.321311	0.321311	0.321311	0.321311	0.321311	0.321311	0.321311
26	clusters	0.664181	0.325562	0.325562	0.325562	0.325562	0.325562	0.325562	0.325562	0.325562	0.325562	0.664181	0.325562	0.325562	0.325562	0.325562	0.325562	0.325562	0.325562	0.325562	0.664181	0.664181	0.325562	0.325562	0.325562	0.325562	0.325562	0.664181	0.325562	0.325562	0.325562	0.325562	0.325562	0.664181	0.325562	0.325562	0.325562	0.325562	0.325562	0.325562	0.664181	0.325562	0.325562	0.325562	0.325562	0.325562	0.325562	0.325562	0.325562
27	fret	0.186907	0.207965	0.231129	0.299001	0.21748	0.235995	0.222275	0.235182	0.231129	0.203243	0.359923
27	states	0.231129	0.231129	0.231129	0.231129	0.231129	0.231129	0.231129	0.231129	0.231129	0.231129	0.231129
27	clusters	0.325562	0.325562	0.325562	0.325562	0.325562	0.325562	0.325562	0.325562	0.325562	0.325562	0.325562
28	fret	0.403723	0.513751	0.462747	0.393717	0.432737	0.365697
28	states	0.41823	0.41823	0.41823	0.41823	0.41823	0.41823
28	clusters	0.325562	0.325562	0.325562	0.325562	0.325562	0.325562
29	fret	0.300783	0.276456	0.233835	0.351641	0.344775	0.407793	0.299809	0.304683	0.201068	0.203953	0.28326	0.317372	0.319326	0.266748	0.282288	0.264808	0.606189	0.546517	0.299809	0.313465	0.360479	0.255115	0.274514	0.474341	0.724895	0.381142	0.28326	0.372279	0.225147	0.221289	0.316395	0.294938	0.338894	0.276456	0.286178	0.318349	0.301758	0.42264	0.326169	0.312489	0.288123	0.276456	0.379171	0.299809	0.275485	0.362445	0.323235	0.342814
29	states	0.299809	0.299809	0.299809	0.299809	0.299809	0.299809	0.299809	0.299809	0.299809	0.299809	0.299809	0.299809	0.299809	0.299809	0.299809	0.299809	0.671452	0.671452	0.299809	0.299809	0.299809	0.299809	0.299809	0.671452	0.671452	0.299809	0.299809	0.299809	0.299809	0.299809	0.299809	0.299809	0.299809	0.299809	0.299809	0.299809	0.299809	0.299809	0.299809	0.299809	0.299809	0.299809	0.299809	0.299809	0.299809	0.299809	0.299809	0.299809
29	clusters	0.325562	0.325562	0.325562	0.325562	0.325562	0.325562	0.325562	0.325562	0.325562	0.325562	0.325562	0.325562	0.325562	0.325562	0.325562	0.325562	0.664181	0.664181	0.325562	0.325562	0.325562	0.325562	0.325562	0.664181	0.664181	0.325562	0.325562	0.325562	0.325562	0.325562	0.325562	0.325562	0.325562	0.325562	0.325562	0.325562	0.325562	0.325562	0.325562	0.325562	0.325562	0.325562	0.325562	0.325562	0.325562	0.325562	0.325562	0.325562
30	fret	0.473051	0.672374	0.256607	0.330352	0.221156	0.31522	0.307145	0.184629	0.368636	0.458024	0.239395	0.330352	0.455017	0.242434	0.265713	0.286945	0.278859	0.373668	0.390768	0.293007	0.300077	0.359575	0.274815	0.298057	0.337409	0.239395	0.271781	0.310174	0.740693	0.754527	0.738716	0.513071	0.257619	0.254582	0.245472	0.255595	0.365616	0.3243	0.356554	0.297047	0.284923	0.255595	0.201886	0.647564	0.3968	0.322283	0.337409	0.376686
30	states	0.712007	0.712007	0.293007	0.293007	0.293007	0.293007	0.293007	0.293007	0.293007	0.293007	0.293007	0.293007	0.293007	0.293007	0.293007	0.293007	0.293007	0.293007	0.293007	0.293007	0.293007	0.293007	0.293007	0.293007	0.293007	0.293007	0.293007	0.293007	0.712007	0.712007	0.712007	0.712007	0.293007	0.293007	0.293007	0.293007	0.293007	0.293007	0.293007	0.293007	0.293007	0.293007	0.293007	0.712007	0.293007	0.293007	0.293007	0.293007
30	clusters	0.664181	0.664181	0.325562	0.325562	0.325562	0.325562	0.325562	0.325562	0.325562	0.325562	0.325562	0.325562	0.325562	0.325562	0.325562	0.325562	0.325562	0.325562	0.325562	0.325562	0.325562	0.325562	0.325562	0.325562	0.325562	0.325562	0.325562	0.325562	0.664181	0.664181	0.664181	0.664181	0.325562	0.325562	0.325562	0.325562	0.325562	0.325562	0.325562	0.325562	0.325562	0.325562	0.325562	0.664181	0.325562	0.325562	0.325562	0.325562
31	fret	0.483754	0.681668	0.788562	0.728111	0.810866	0.793021	0.819828	0.82095	0.814224	0.875299	0.877584	0.837831	0.807512	0.828816	0.818707
31	states	0.814224	0.814224	0.814224	0.814224	0.814224	0.814224	0.814224	0.814224	0.814224	0.814224	0.814224	0.814224	0.814224	0.814224	0.814224
31	clusters	0.664181	0.664181	0.664181	0.664181	0.664181	0.664181	0.664181	0.664181	0.664181	0.664181	0.664181	0.664181	0.664181	0.664181	0.664181
32	fret	0.269529	0.281382	0.2419	0.266566	0.291267	0.299178	0.286324	0.273479	0.331849	0.266566	0.253735	0.292255	0.312041	0.263605	0.293244	0.627569	0.75087	0.450156	0.34176	0.33284	0.316991	0.312041	0.232043	0.284347	0.2419	0.278418	0.267554	0.306103	0.235985	0.243872	0.254722	0.268541	0.308082	0.268541	0.228101	0.268541	0.300167
32	states	0.275948	0.275948	0.275948	0.275948	0.275948	0.275948	0.275948	0.275948	0.275948	0.275948	0.275948	0.275948	0.275948	0.275948	0.275948	0.627569	0.627569	0.627569	0.275948	0.275948	0.275948	0.275948	0.275948	0.275948	0.275948	0.275948	0.275948	0.275948	0.275948	0.275948	0.275948	0.275948	0.275948	0.275948	0.275948	0.275948	0.275948
32	clusters	0.325562	0.325562	0.325562	0.325562	0.325562	0.325562	0.325562	0.325562	0.325562	0.325562	0.325562	0.325562	0.325562	0.325562	0.325562	0.664181	0.664181	0.664181	0.325562	0.325562	0.325562	0.325562	0.325562	0.325562	0.325562	0.325562	0.325562	0.325562	0.325562	0.325562	0.325562	0.325562	0.325562	0.325562	0.325562	0.325562	0.325562
33	fret	0.276107	0.270465	0.297825	0.203493	0.300668	0.274226	0.329232	0.324455	0.230306	0.598722	0.597688	0.293092	0.317777	0.495802	0.647668	0.354185	0.226594	0.283645	0.360935	0.466807	0.28931	0.273285	0.270465	0.22845	0.603897	0.639289	0.636152	0.599756	0.705821	0.297825	0.241464	0.271405	0.263895	0.27799	0.54841	0.641382	0.615308	0.465812	0.283645	0.33689	0.27799	0.357076	0.333059	0.335932	0.27799	0.657109	0.717567
33	states	0.283645	0.283645	0.283645	0.283645	0.283645	0.283645	0.283645	0.283645	0.283645	0.609602	0.609602	0.283645	0.283645	0.609602	0.609602	0.283645	0.283645	0.283645	0.283645	0.609602	0.283645	0.283645	0.283645	0.283645	0.609602	0.609602	0.609602	0.609602	0.609602	0.283645	0.283645	0.283645	0.283645	0.283645	0.609602	0.609602	0.609602	0.609602	0.283645	0.283645	0.283645	0.283645	0.283645	0.283645	0.283645	0.609602	0.609602
33	clusters	0.325562	0.325562	0.325562	0.325562	0.325562	0.325562	0.325562	0.325562	0.325562	0.664181	0.664181	0.325562	0.325562	0.664181	0.664181	0.325562	0.325562	0.325562	0.325562	0.664181	0.325562	0.325562	0.325562	0.325562	0.664181	0.664181	0.664181	0.664181	0.664181	0.325562	0.325562	0.325562	0.325562	0.325562	0.664181	0.664181	0.664181	0.664181	0.325562	0.325562	0.325562	0.325562	0.325562	0.325562	0.325562	0.664181	0.664181
34	fret	0.682784	0.706925	0.69284	0.34662	0.366536	0.276015	0.228366	0.304836	0.260124	0.190692	0.300859	0.372513	0.35359	0.423361	0.300859	0.518284	0.339653	0.261117	0.238287	0.284957	0.208532	0.271048	0.250197	0.323732	0.270055	0.244241	0.283963	0.239279	0.248211	0.315774	0.398426	0.723028	0.658661	0.658661	0.654642	0.341643	0.268069	0.184747	0.277008	0.319753	0.348611	0.383474	0.280982	0.232334	0.34662	0.247219	0.292907	0.296883
34	states	0.682784	0.682784	0.682784	0.281975	0.281975	0.281975	0.281975	0.281975	0.281975	0.281975	0.281975	0.281975	0.281975	0.281975	0.281975	0.281975	0.281975	0.281975	0.281975	0.281975	0.281975	0.281975	0.281975	0.281975	0.281975	0.281975	0.281975	0.281975	0.281975	0.281975	0.281975	0.682784	0.682784	0.682784	0.682784	0.281975	0.281975	0.281975	0.281975	0.281975	0.281975	0.281975	0.281975	0.281975	0.281975	0.281975	0.281975	0.281975
34	clusters	0.664181	0.664181	0.664181	0.325562	0.325562	0.325562	0.325562	0.325562	0.325562	0.325562	0.325562	0.325562	0.325562	0.325562	0.325562	0.325562	0.325562	0.325562	0.325562	0.325562	0.325562	0.325562	0.325562	0.325562	0.325562	0.325562	0.325562	0.325562	0.325562	0.325562	0.325562	0.664181	0.664181	0.664181	0.664181	0.325562	0.325562	0.325562	0.325562	0.325562	0.325562	0.325562	0.325562	0.325562	0.325562	0.325562	0.325562	0.325562
35	fret	0.269495	0.65189	0.32882	0.355411	0.336099	0.248931	0.419087	0.793187	0.6577	0.75277	0.330636	0.369391	0.310808	0.31977	0.431819	0.316184	0.253186	0.377854	0.325197	0.237096	0.27036	0.384476	0.309022	0.462697	0.532028	0.360054	0.315287	0.378798	0.393041	0.359124	0.334275	0.301013	0.286904	0.178832	0.325197	0.191712	0.368454	0.317981	0.279039	0.337012	0.277298	0.254893	0.347098	0.337925	0.389227	0.355411	0.300127	0.337012
35	states	0.334275	0.68375	0.334275	0.334275	0.334275	0.334275	0.334275	0.68375	0.68375	0.68375	0.334275	0.334275	0.334275	0.334275	0.334275	0.334275	0.334275	0.334275	0.334275	0.334275	0.334275	0.334275	0.334275	0.334275	0.334275	0.334275	0.334275	0.334275	0.334275	0.334275	0.334275	0.334275	0.334275	0.334275	0.334275	0.334275	0.334275	0.334275	0.334275	0.334275	0.334275	0.334275	0.334275	0.334275	0.334275	0.334275	0.334275	0.334275
35	clusters	0.325562	0.664181	0.325562	0.325562	0.325562	0.325562	0.325562	0.664181	0.664181	0.664181	0.325562	0.325562	0.325562	0.325562	0.325562	0.325562	0.325562	0.325562	0.325562	0.325562	0.325562	0.325562	0.325562	0.325562	0.325562	0.325562	0.325562	0.325562	0.325562	0.325562	0.325562	0.325562	0.325562	0.325562	0.325562	0.325562	0.325562	0.325562	0.325562	0.325562	0.325562	0.325562	0.325562	0.325562	0.325562	0.325562	0.325562	0.325562
36	fret	0.395221	0.790488	0.772872	0.766995	0.968214	0.674562	0.699213	0.581459	0.700198	0.365941	0.316318	0.352796	0.382104	0.340647	0.320376	0.337608	0.423429	0.340647	0.339634	0.403287	0.408325	0.329502	0.413362	0.38816	0.383114	0.284825	0.358864	0.271596	0.299057	0.291944	0.305152	0.667651	0.669626	0.691328	0.467631	0.375035	0.27465	0.255295	0.296009	0.365941	0.243056	0.265486	0.331529	0.272614	0.425441	0.597352	0.738549	0.667651
36	states	0.347734	0.691328	0.691328	0.691328	0.691328	0.691328	0.691328	0.691328	0.691328	0.347734	0.347734	0.347734	0.347734	0.347734	0.347734	0.347734	0.347734	0.347734	0.347734	0.347734	0.347734	0.347734	0.347734	0.347734	0.347734	0.347734	0.347734	0.347734	0.347734	0.347734	0.347734	0.691328	0.691328	0.691328	0.347734	0.347734	0.347734	0.347734	0.347734	0.347734	0.347734	0.347734	0.347734	0.347734	0.347734	0.691328	0.691328	0.691328
36	clusters	0.325562	0.664181	0.664181	0.664181	0.664181	0.664181	0.664181	0.664181	0.664181	0.325562	0.325562	0.325562	0.325562	0.325562	0.325562	0.325562	0.325562	0.325562	0.325562	0.325562	0.325562	0.325562	0.325562	0.325562	0.325562	0.325562	0.325562	0.325562	0.325562	0.325562	0.325562	0.664181	0.664181	0.664181	0.325562	0.325562	0.325562	0.325562	0.325562	0.325562	0.325562	0.325562	0.325562	0.325562	0.325562	0.664181	0.664181	0.664181
37	fret	0.365532	0.305887	0.229357	0.329824	0.346189	0.336554	0.352948	0.324065	0.250929	0.418254	0.300164	0.312574	0.348119	0.290646	0.385949	0.362624	0.428098	0.375241	0.694269	0.799031	0.839321	0.60558	0.335592	0.367472	0.329824	0.378153	0.351016	0.35005	0.342332	0.413342	0.283048	0.27736	0.345224	0.292547	0.386924	0.280203	0.39571	0.736702	0.776358	0.770976	0.539078	0.351982	0.317354	0.390826	0.33463	0.376208	0.333669	0.356816
37	states	0.343296	0.343296	0.343296	0.343296	0.343296	0.343296	0.343296	0.343296	0.343296	0.343296	0.343296	0.343296	0.343296	0.343296	0.343296	0.343296	0.343296	0.343296	0.743106	0.743106	0.743106	0.55433	0.343296	0.343296	0.343296	0.343296	0.343296	0.343296	0.343296	0.343296	0.343296	0.343296	0.343296	0.343296	0.343296	0.343296	0.343296	0.743106	0.743106	0.743106	0.55433	0.343296	0.343296	0.343296	0.343296	0.343296	0.343296	0.343296
37	clusters	0.325562	0.325562	0.325562	0.325562	0.325562	0.325562	0.325562	0.325562	0.325562	0.325562	0.325562	0.325562	0.325562	0.325562	0.325562	0.325562	0.325562	0.325562	0.664181	0.664181	0.664181	0.664181	0.325562	0.325562	0.325562	0.325562	0.325562	0.325562	0.325562	0.325562	0.325562	0.325562	0.325562	0.325562	0.325562	0.325562	0.325562	0.664181	0.664181	0.664181	0.664181	0.325562	0.325562	0.325562	0.325562	0.325562	0.325562	0.325562
38	fret	0.309981	0.361833	0.348719	0.441922	0.835323	0.786197	0.272777	0.411332	0.254495	0.26594	0.356379	0.180918	0.197492	0.361833	0.303267	0.407086	0.374863	0.314446	0.290899	0.457563	0.906166	0.728509	0.394252	0.419817	0.728509	0.767757	0.523942	0.20338	0.167804	0.237209	0.293153	0.360744	0.408151	0.267081	0.800122	0.711299	0.424047	0.157014	0.241833	0.285253	0.264798	0.305507	0.298778	0.301023	0.281858	0.222112	0.332207	0.242987
38	states	0.303267	0.303267	0.303267	0.303267	0.710389	0.710389	0.303267	0.303267	0.303267	0.303267	0.303267	0.303267	0.303267	0.303267	0.303267	0.303267	0.303267	0.303267	0.303267	0.303267	0.710389	0.710389	0.303267	0.303267	0.710389	0.710389	0.710389	0.303267	0.303267	0.303267	0.303267	0.303267	0.303267	0.303267	0.710389	0.710389	0.303267	0.303267	0.303267	0.303267	0.303267	0.303267	0.303267	0.303267	0.303267	0.303267	0.303267	0.303267
38	clusters	0.325562	0.325562	0.325562	0.325562	0.664181	0.664181	0.325562	0.325562	0.325562	0.325562	0.325562	0.325562	0.325562	0.325562	0.325562	0.325562	0.325562	0.325562	0.325562	0.325562	0.664181	0.664181	0.325562	0.325562	0.664181	0.664181	0.664181	0.325562	0.325562	0.325562	0.325562	0.325562	0.325562	0.325562	0.664181	0.664181	0.325562	0.325562	0.325562	0.325562	0.325562	0.325562	0.325562	0.325562	0.325562	0.325562	0.325562	0.325562
39	fret	0.336082	0.372033	0.445841	0.755468	0.773743	0.802594	0.496851	0.371079	0.282389	0.358715	0.260576	0.330462	0.396027	0.291547	0.335145	0.311839	0.30721	0.350199	0.329527	0.386396	0.339837	0.297975	0.412501	0.336082	0.314622	0.33327	0.378724	0.385436	0.334207	0.326724	0.300746	0.289712	0.305361	0.382556	0.853077	0.414448	0.325791	0.335145	0.354926	0.332334	0.258769	0.737338	0.752057	0.737338	0.750922	0.776018	0.294295	0.33327
39	states	0.33796	0.33796	0.33796	0.33796	0.33796	0.33796	0.33796	0.33796	0.33796	0.33796	0.33796	0.33796	0.33796	0.33796	0.33796	0.33796	0.33796	0.33796	0.33796	0.33796	0.33796	0.33796	0.33796	0.33796	0.33796	0.33796	0.33796	0.33796	0.33796	0.33796	0.33796	0.33796	0.33796	0.33796	0.33796	0.33796	0.33796	0.33796	0.33796	0.33796	0.33796	0.737338	0.33796	0.33796	0.33796	0.33796	0.33796	0.33796
39	clusters	0.325562	0.325562	0.325562	0.325562	0.325562	0.325562	0.325562	0.325562	0.325562	0.325562	0.325562	0.325562	0.325562	0.325562	0.325562	0.325562	0.325562	0.325562	0.325562	0.325562	0.325562	0.325562	0.325562	0.325562	0.325562	0.325562	0.325562	0.325562	0.325562	0.325562	0.325562	0.325562	0.325562	0.325562	0.325562	0.325562	0.325562	0.325562	0.325562	0.325562	0.325562	0.664181	0.325562	0.325562	0.325562	0.325562	0.325562	0.325562
40	fret	0.419921	0.270793	0.253419	0.287121	0.263642	0.257509	0.331901	0.312586	0.218589	0.25035	0.256487	0.25035	0.200105	0.238066	0.194966	0.234993	0.213457	0.308516	0.270793	0.205243	0.299352	0.218589	0.210378	0.246256	0.255464	0.224743	0.246256	0.246256	0.305462	0.228844	0.260576	0.205243	0.325805	0.24728	0.263642	0.270793	0.254441	0.238066	0.303426	0.249327	0.297314	0.222692	0.29018	0.263642	0.225768	0.227819	0.310551	0.234993
40	states	0.400756	0.25035	0.25035	0.25035	0.25035	0.25035	0.25035	0.25035	0.25035	0.25035	0.25035	0.25035	0.25035	0.25035	0.25035	0.25035	0.25035	0.25035	0.25035	0.25035	0.25035	0.25035	0.25035	0.25035	0.25035	0.25035	0.25035	0.25035	0.25035	0.25035	0.25035	0.25035	0.25035	0.25035	0.25035	0.25035	0.25035	0.25035	0.25035	0.25035	0.25035	0.25035	0.25035	0.25035	0.25035	0.25035	0.25035	0.25035
40	clusters	0.325562	0.325562	0.325562	0.325562	0.325562	0.325562	0.325562	0.325562	0.325562	0.325562	0.325562	0.325562	0.325562	0.325562	0.325562	0.325562	0.325562	0.325562	0.325562	0.325562	0.325562	0.325562	0.325562	0.325562	0.325562	0.325562	0.325562	0.325562	0.325562	0.325562	0.325562	0.325562	0.325562	0.325562	0.325562	0.325562	0.325562	0.325562	0.325562	0.325562	0.325562	0.325562	0.325562	0.325562	0.325562	0.325562	0.325562	0.325562
41	fret	0.263563	0.361734	0.343851	0.314081	0.349811	0.404511	0.372669	0.264552	0.281379	0.255649	0.321023	0.373663	0.314081	0.28534	0.327969	0.263563	0.352791	0.290293	0.21711	0.275439	0.295247	0.324992	0.411482	0.36074	0.274449	0.298219	0.267521	0.317056	0.310114	0.318048	0.352791	0.338886	0.315072	0.328961	0.287321	0.358752	0.343851	0.303175	0.314081	0.330946	0.316064	0.28336	0.375652	0.267521	0.30714	0.349811	0.322016	0.317056
41	states	0.320032	0.320032	0.320032	0.320032	0.320032	0.320032	0.320032	0.320032	0.320032	0.320032	0.320032	0.320032	0.320032	0.320032	0.320032	0.320032	0.320032	0.320032	0.320032	0.320032	0.320032	0.320032	0.320032	0.320032	0.320032	0.320032	0.320032	0.320032	0.320032	0.320032	0.320032	0.320032	0.320032	0.320032	0.320032	0.320032	0.320032	0.320032	0.320032	0.320032	0.320032	0.320032	0.320032	0.320032	0.320032	0.320032	0.320032	0.320032
41	clusters	0.325562	0.325562	0.325562	0.325562	0.325562	0.325562	0.325562	0.325562	0.325562	0.325562	0.325562	0.325562	0.325562	0.325562	0.325562	0.325562	0.325562	0.325562	0.325562	0.325562	0.325562	0.325562	0.325562	0.325562	0.325562	0.325562	0.325562	0.325562	0.325562	0.325562	0.325562	0.325562	0.325562	0.325562	0.325562	0.325562	0.325562	0.325562	0.325562	0.325562	0.325562	0.325562	0.325562	0.325562	0.325562	0.325562	0.325562	0.325562
42	fret	0.299123	0.35541	0.291242	0.347496	0.292227	0.28435	0.308981	0.321807	0.351453	0.50568	0.614201	0.439792	0.302079	0.304051	0.308981	0.386123	0.347496	0.338597	0.312926	0.299123	0.295182	0.318846	0.346507	0.298138	0.2578	0.461719	0.403989	0.632373
42	states	0.310953	0.310953	0.310953	0.310953	0.310953	0.310953	0.310953	0.310953	0.310953	0.50568	0.50568	0.50568	0.310953	0.310953	0.310953	0.310953	0.310953	0.310953	0.310953	0.310953	0.310953	0.310953	0.310953	0.310953	0.310953	0.310953	0.310953	0.632373
42	clusters	0.325562	0.325562	0.325562	0.325562	0.325562	0.325562	0.325562	0.325562	0.325562	0.664181	0.664181	0.664181	0.325562	0.325562	0.325562	0.325562	0.325562	0.325562	0.325562	0.325562	0.325562	0.325562	0.325562	0.325562	0.325562	0.325562	0.325562	0.664181
43	fret	0.367893	0.34354	0.359421	0.358483	0.35006	0.421625	0.434356	0.384971	0.338889	0.349127	0.405125	0.385925	0.403195	0.392619	0.560946	0.295921	0.325056	0.286925	0.337962	0.268201	0.279758	0.317722	0.373566	0.35006	0.325975	0.296823	0.366949	0.34354	0.308601	0.330579	0.257601	0.333347	0.301343	0.270862	0.262892	0.705708	0.721908	0.708014	0.730063	0.416755	0.305876	0.331501	0.336121	0.716105	0.369782	0.375461	0.334271	0.247947
43	states	0.366949	0.366949	0.366949	0.366949	0.366949	0.366949	0.366949	0.366949	0.366949	0.366949	0.366949	0.366949	0.366949	0.366949	0.645132	0.292316	0.292316	0.292316	0.292316	0.292316	0.292316	0.292316	0.366949	0.366949	0.366949	0.292316	0.366949	0.366949	0.292316	0.292316	0.292316	0.292316	0.292316	0.292316	0.292316	0.645132	0.645132	0.645132	0.645132	0.366949	0.366949	0.366949	0.366949	0.645132	0.366949	0.366949	0.366949	0.292316
43	clusters	0.325562	0.325562	0.325562	0.325562	0.325562	0.325562	0.325562	0.325562	0.325562	0.325562	0.325562	0.325562	0.325562	0.325562	0.664181	0.325562	0.325562	0.325562	0.325562	0.325562	0.325562	0.325562	0.325562	0.325562	0.325562	0.325562	0.325562	0.325562	0.325562	0.325562	0.325562	0.325562	0.325562	0.325562	0.325562	0.664181	0.664181	0.664181	0.664181	0.325562	0.325562	0.325562	0.325562	0.664181	0.325562	0.325562	0.325562	0.325562
44	fret	0.257207	0.414436	0.647855	0.359316	0.324126	0.286217	0.34463	0.336811	0.346586	0.379931	0.266861	0.386818	0.293005	0.320227	0.358335	0.219688	0.293975	0.213936	0.397654	0.384849	0.311465	0.336811	0.384849	0.781285	0.803254	0.292035	0.409496	0.268794	0.387802	0.37207	0.238902	0.337788	0.228327	0.409496	0.288156	0.199576	0.255278	0.581621	0.758341	0.777108	0.763549
44	states	0.330468	0.330468	0.763549	0.330468	0.330468	0.330468	0.330468	0.330468	0.330468	0.330468	0.330468	0.330468	0.330468	0.330468	0.330468	0.330468	0.330468	0.330468	0.330468	0.330468	0.330468	0.330468	0.330468	0.763549	0.763549	0.330468	0.330468	0.330468	0.330468	0.330468	0.330468	0.330468	0.330468	0.330468	0.330468	0.330468	0.330468	0.763549	0.763549	0.763549	0.763549
44	clusters	0.325562	0.325562	0.664181	0.325562	0.325562	0.325562	0.325562	0.325562	0.325562	0.325562	0.325562	0.325562	0.325562	0.325562	0.325562	0.325562	0.325562	0.325562	0.325562	0.325562	0.325562	0.325562	0.325562	0.664181	0.664181	0.325562	0.325562	0.325562	0.325562	0.325562	0.325562	0.325562	0.325562	0.325562	0.325562	0.325562	0.325562	0.664181	0.664181	0.664181	0.664181
45	fret	0.258277	0.590743	0.436978	0.56137	0.804301	0.796312	0.311295	0.351403	0.783828	0.654089	0.587822	0.353552	0.599484	0.604325	0.417173	0.297047	0.291545	0.252688	0.281611	0.371747	0.242598	0.545553	0.583922	0.310202	0.212083	0.314571	0.3557	0.451467	0.325461	0.279398	0.641748	0.782038	0.808727	0.711128	0.480187	0.212083	0.380263	0.342786	0.204115	0.548527	0.44837	0.461764	0.343865	0.25716	0.38451	0.289341	0.310202	0.31348
45	states	0.465866	0.465866	0.465866	0.465866	0.72907	0.72907	0.307467	0.307467	0.72907	0.72907	0.465866	0.465866	0.465866	0.465866	0.465866	0.307467	0.307467	0.307467	0.307467	0.307467	0.307467	0.465866	0.465866	0.307467	0.307467	0.307467	0.307467	0.307467	0.307467	0.307467	0.72907	0.72907	0.72907	0.72907	0.465866	0.307467	0.307467	0.307467	0.307467	0.465866	0.465866	0.465866	0.307467	0.307467	0.307467	0.307467	0.307467	0.307467
45	clusters	0.325562	0.325562	0.325562	0.325562	0.664181	0.664181	0.325562	0.325562	0.664181	0.664181	0.325562	0.325562	0.325562	0.325562	0.325562	0.325562	0.325562	0.325562	0.325562	0.325562	0.325562	0.325562	0.325562	0.325562	0.325562	0.325562	0.325562	0.325562	0.325562	0.325562	0.664181	0.664181	0.664181	0.664181	0.325562	0.325562	0.325562	0.325562	0.325562	0.325562	0.325562	0.325562	0.325562	0.325562	0.325562	0.325562	0.325562	0.325562
46	fret	0.331327	0.467965	0.346722	0.475436	0.500714	0.214372	0.417728	0.511117	0.373538	0.333708	0.429925	0.471172	0.411026	0.424395	0.563695	0.458293	0.467965	0.302425	0.493395	0.467965	0.477562	0.385003	0.422177	0.246481	0.489192	0.318159	0.428821	0.436528	0.308498	0.328943	0.379275	0.363101	0.316955	0.378126	0.551758	0.478624	0.227306	0.493395	0.423287	0.440911	0.366583	0.55575	0.677756	0.697337	0.643123	0.759134	0.643123	0.711368
46	states	0.405414	0.405414	0.405414	0.405414	0.405414	0.405414	0.405414	0.405414	0.405414	0.405414	0.405414	0.405414	0.405414	0.405414	0.405414	0.405414	0.405414	0.405414	0.405414	0.405414	0.405414	0.405414	0.405414	0.405414	0.405414	0.405414	0.405414	0.405414	0.405414	0.405414	0.405414	0.405414	0.405414	0.405414	0.405414	0.405414	0.405414	0.405414	0.405414	0.405414	0.405414	0.660596	0.660596	0.660596	0.660596	0.660596	0.660596	0.660596
46	clusters	0.325562	0.325562	0.325562	0.325562	0.325562	0.325562	0.325562	0.325562	0.325562	0.325562	0.325562	0.325562	0.325562	0.325562	0.325562	0.325562	0.325562	0.325562	0.325562	0.325562	0.325562	0.325562	0.325562	0.325562	0.325562	0.325562	0.325562	0.325562	0.325562	0.325562	0.325562	0.325562	0.325562	0.325562	0.325562	0.325562	0.325562	0.325562	0.325562	0.325562	0.325562	0.664181	0.664181	0.664181	0.664181	0.664181	0.664181	0.664181
47	fret	0.356988	0.686185	0.656406	0.615415	0.308389	0.219013	0.356028	0.493523	0.532939	0.397602	0.277366	0.303672	0.257787	0.326406	0.211685	0.241107	0.307449	0.271759	0.306504	0.193444	0.224521	0.374327	0.190718	0.261506	0.263368	0.337838	0.322605	0.286734	0.260576	0.238337	0.252213	0.282046	0.296132	0.222684	0.317861	0.213515	0.278301	0.544159	0.319757	0.257787	0.242032	0.25314	0.275495	0.430883	0.279237	0.208028	0.240183	0.254068
47	states	0.272692	0.495533	0.495533	0.495533	0.272692	0.272692	0.272692	0.495533	0.495533	0.495533	0.272692	0.272692	0.272692	0.272692	0.272692	0.272692	0.272692	0.272692	0.272692	0.272692	0.272692	0.272692	0.272692	0.272692	0.272692	0.272692	0.272692	0.272692	0.272692	0.272692	0.272692	0.272692	0.272692	0.272692	0.272692	0.272692	0.272692	0.495533	0.272692	0.272692	0.272692	0.272692	0.272692	0.495533	0.272692	0.272692	0.272692	0.272692
47	clusters	0.325562	0.664181	0.664181	0.664181	0.325562	0.325562	0.325562	0.664181	0.664181	0.664181	0.325562	0.325562	0.325562	0.325562	0.325562	0.325562	0.325562	0.325562	0.325562	0.325562	0.325562	0.325562	0.325562	0.325562	0.325562	0.325562	0.325562	0.325562	0.325562	0.325562	0.325562	0.325562	0.325562	0.325562	0.325562	0.325562	0.325562	0.664181	0.325562	0.325562	0.325562	0.325562	0.325562	0.664181	0.325562	0.325562	0.325562	0.325562
48	fret	0.274235	0.288966	0.241431	0.240532	0.356454	0.315911	0.327154	0.28989	0.467491	0.490542	0.34034	0.265991	0.372681	0.292664	0.318716	0.402566	0.275153	0.330914	0.265077	0.34034	0.236918	0.34223	0.317781	0.297295	0.417166	0.295441	0.335622	0.341285	0.353602	0.309378	0.34034	0.265077	0.242336	0.327154	0.234211	0.247776	0.279748	0.308446	0.395785	0.256865	0.291739	0.478488	0.683346	0.646539	0.375557	0.355503	0.301928	0.432839
48	states	0.315911	0.315911	0.315911	0.315911	0.315911	0.315911	0.315911	0.315911	0.683346	0.683346	0.315911	0.315911	0.315911	0.315911	0.315911	0.315911	0.315911	0.315911	0.315911	0.315911	0.315911	0.315911	0.315911	0.315911	0.315911	0.315911	0.315911	0.315911	0.315911	0.315911	0.315911	0.315911	0.315911	0.315911	0.315911	0.315911	0.315911	0.315911	0.315911	0.315911	0.315911	0.683346	0.683346	0.683346	0.315911	0.315911	0.315911	0.315911
48	clusters	0.325562	0.325562	0.325562	0.325562	0.325562	0.325562	0.325562	0.325562	0.664181	0.664181	0.325562	0.325562	0.325562	0.325562	0.325562	0.325562	0.325562	0.325562	0.325562	0.325562	0.325562	0.325562	0.325562	0.325562	0.325562	0.325562	0.325562	0.325562	0.325562	0.325562	0.325562	0.325562	0.325562	0.325562	0.325562	0.325562	0.325562	0.325562	0.325562	0.325562	0.325562	0.664181	0.664181	0.664181	0.325562	0.325562	0.325562	0.325562
49	fret	0.301402	0.375071	0.28862	0.284348	0.333161	0.355225	0.337374	0.313085	0.297147	0.331053	0.355225	0.342634	0.352082	0.28862	0.38651	0.289686	0.299275	0.331053	0.372987	0.399981	0.317317	0.28328	0.348935	0.301402	0.301402	0.287552	0.301402	0.36255	0.268286	0.343685	0.299275	0.302466	0.296082	0.338427	0.277932	0.31096	0.302466	0.28328	0.304591	0.299275	0.302466	0.284348	0.309899	0.343685	0.245678	0.287552	0.332107	0.320492
49	states	0.313085	0.313085	0.313085	0.313085	0.313085	0.313085	0.313085	0.313085	0.313085	0.313085	0.313085	0.313085	0.313085	0.313085	0.313085	0.313085	0.313085	0.313085	0.313085	0.313085	0.313085	0.313085	0.313085	0.313085	0.313085	0.313085	0.313085	0.313085	0.313085	0.313085	0.313085	0.313085	0.313085	0.313085	0.313085	0.313085	0.313085	0.313085	0.313085	0.313085	0.313085	0.313085	0.313085	0.313085	0.313085	0.313085	0.313085	0.313085
49	clusters	0.325562	0.325562	0.325562	0.325562	0.325562	0.325562	0.325562	0.325562	0.325562	0.325562	0.325562	0.325562	0.325562	0.325562	0.325562	0.325562	0.325562	0.325562	0.325562	0.325562	0.325562	0.325562	0.325562	0.325562	0.325562	0.325562	0.325562	0.325562	0.325562	0.325562	0.325562	0.325562	0.325562	0.325562	0.325562	0.325562	0.325562	0.325562	0.325562	0.325562	0.325562	0.325562	0.325562	0.325562	0.325562	0.325562	0.325562	0.325562
50	fret	0.24905	0.251361	0.269752	0.259427	0.278885	0.287976	0.311648	0.304913	0.193984	0.209364	0.320593	0.259427	0.226968	0.228136	0.239782	0.224629	0.195171	0.222288	0.177296	0.315007	0.275465	0.203462	0.232802	0.344986	0.244421	0.344986	0.244421	0.272039	0.382103	0.808253	0.770899	0.796178	0.236295	0.339478	0.217598	0.278885	0.297027	0.330608	0.341687	0.165284	0.283436	0.203462	0.240943	0.26517	0.168894	0.317244	0.283436	0.341687
50	states	0.261725	0.261725	0.261725	0.261725	0.261725	0.261725	0.261725	0.261725	0.261725	0.261725	0.261725	0.261725	0.261725	0.261725	0.261725	0.261725	0.261725	0.261725	0.261725	0.261725	0.261725	0.261725	0.261725	0.261725	0.261725	0.261725	0.261725	0.261725	0.261725	0.762097	0.762097	0.762097	0.261725	0.261725	0.261725	0.261725	0.261725	0.261725	0.261725	0.261725	0.261725	0.261725	0.261725	0.261725	0.261725	0.261725	0.261725	0.261725
50	clusters	0.325562	0.325562	0.325562	0.325562	0.325562	0.325562	0.325562	0.325562	0.325562	0.325562	0.325562	0.325562	0.325562	0.325562	0.325562	0.325562	0.325562	0.325562	0.325562	0.325562	0.325562	0.325562	0.325562	0.325562	0.325562	0.325562	0.325562	0.325562	0.325562	0.664181	0.664181	0.664181	0.325562	0.325562	0.325562	0.325562	0.325562	0.325562	0.325562	0.325562	0.325562	0.325562	0.325562	0.325562	0.325562	0.325562	0.325562	0.325562
51	fret	0.193131	0.172789	0.155159	0.369554	0.575816	0.203839	0.198886	0.25533	0.566053	0.50054	0.169565	0.223011	0.474938	0.639214	0.664431	0.45682	0.167153	0.210475	0.228903	0.180886	0.149601	0.205495	0.165547	0.152774	0.239068	0.326111	0.227217	0.346277	0.230592	0.207153	0.193951	0.211307	0.198886	0.204667	0.133077	0.317965	0.163142	0.180886	0.210475	0.556355	0.429071	0.670222	0.683042	0.598855	0.611047	0.673707	0.630149	0.314356
51	states	0.198062	0.198062	0.198062	0.369554	0.559045	0.198062	0.198062	0.198062	0.559045	0.559045	0.198062	0.198062	0.559045	0.559045	0.559045	0.559045	0.198062	0.198062	0.198062	0.198062	0.198062	0.198062	0.198062	0.198062	0.198062	0.559045	0.198062	0.559045	0.198062	0.198062	0.198062	0.198062	0.198062	0.198062	0.198062	0.559045	0.198062	0.198062	0.198062	0.559045	0.559045	0.559045	0.559045	0.559045	0.559045	0.559045	0.559045	0.559045
51	clusters	0.325562	0.325562	0.325562	0.325562	0.664181	0.325562	0.325562	0.325562	0.664181	0.664181	0.325562	0.325562	0.664181	0.664181	0.664181	0.664181	0.325562	0.325562	0.325562	0.325562	0.325562	0.325562	0.325562	0.325562	0.325562	0.664181	0.325562	0.664181	0.325562	0.325562	0.325562	0.325562	0.325562	0.325562	0.325562	0.664181	0.325562	0.325562	0.325562	0.664181	0.664181	0.664181	0.664181	0.664181	0.664181	0.664181	0.664181	0.664181
52	fret	0.304207	0.33035	0.350841	0.29763	0.31404	0.345463	0.707846	0.750033	0.816302	0.754572	0.766331	0.772638	0.702286	0.703214	0.748215	0.798582	0.805686	0.765429	0.776234	0.517	0.33035	0.311858	0.304207	0.308582	0.32492	0.345463	0.357279	0.323834	0.359421	0.293236	0.327098	0.638322	0.765429	0.421799	0.340073	0.310766	0.355135	0.291036	0.304207	0.291036	0.336834	0.323834	0.294335
52	states	0.323834	0.323834	0.323834	0.323834	0.323834	0.323834	0.765429	0.765429	0.765429	0.765429	0.765429	0.765429	0.765429	0.765429	0.765429	0.765429	0.765429	0.765429	0.765429	0.4694	0.323834	0.323834	0.323834	0.323834	0.323834	0.323834	0.323834	0.323834	0.323834	0.323834	0.323834	0.765429	0.765429	0.4694	0.323834	0.323834	0.323834	0.323834	0.323834	0.323834	0.323834	0.323834	0.323834
52	clusters	0.325562	0.325562	0.325562	0.325562	0.325562	0.325562	0.664181	0.664181	0.664181	0.664181	0.664181	0.664181	0.664181	0.664181	0.664181	0.664181	0.664181	0.664181	0.664181	0.325562	0.325562	0.325562	0.325562	0.325562	0.325562	0.325562	0.325562	0.325562	0.325562	0.325562	0.325562	0.664181	0.664181	0.325562	0.325562	0.325562	0.325562	0.325562	0.325562	0.325562	0.325562	0.325562	0.325562
53	fret	0.285837	0.241337	0.359596	0.716494	0.674556	0.729897	0.725421	0.687718	0.280338	0.24314	0.257578	0.255768	0.203059	0.751275	0.688818	0.529414	0.17241	0.297794	0.24584	0.261203	0.297794	0.221668	0.262111	0.288592	0.278508	0.269383	0.348227	0.237751	0.329412	0.242236	0.250347	0.236855	0.235062	0.24584	0.249445	0.286755	0.286755	0.29135	0.228801	0.217222	0.345394	0.242236	0.252152	0.255768	0.25396	0.253056	0.281254	0.228801
53	states	0.273028	0.273028	0.273028	0.273028	0.674556	0.273028	0.273028	0.273028	0.273028	0.273028	0.273028	0.273028	0.273028	0.273028	0.273028	0.273028	0.273028	0.273028	0.273028	0.273028	0.273028	0.273028	0.273028	0.273028	0.273028	0.273028	0.273028	0.273028	0.273028	0.273028	0.273028	0.273028	0.273028	0.273028	0.273028	0.273028	0.273028	0.273028	0.273028	0.273028	0.273028	0.273028	0.273028	0.273028	0.273028	0.273028	0.273028	0.273028
53	clusters	0.325562	0.325562	0.325562	0.325562	0.664181	0.325562	0.325562	0.325562	0.325562	0.325562	0.325562	0.325562	0.325562	0.325562	0.325562	0.325562	0.325562	0.325562	0.325562	0.325562	0.325562	0.325562	0.325562	0.325562	0.325562	0.325562	0.325562	0.325562	0.325562	0.325562	0.325562	0.325562	0.325562	0.325562	0.325562	0.325562	0.325562	0.325562	0.325562	0.325562	0.325562	0.325562	0.325562	0.325562	0.325562	0.325562	0.325562	0.325562
54	fret	0.384685	0.361377	0.395212	0.341081	0.366692	0.711313	0.38574	0.452372	0.394169	0.594389	0.729833	0.620524	0.366692	0.40988	0.450316	0.341081	0.445166	0.443104	0.331413	0.293481	0.315222	0.326034	0.332489	0.376233	0.391014	0.314139	0.375175	0.386794	0.362441	0.322797	0.332489	0.284735	0.396263	0.343225	0.472853	0.401509	0.371997	0.470812	0.40988	0.432766	0.375175	0.167261	0.286925	0.690796	0.754584	0.438974	0.310888	0.379406
54	states	0.375175	0.375175	0.375175	0.375175	0.375175	0.690796	0.375175	0.375175	0.375175	0.690796	0.690796	0.690796	0.375175	0.375175	0.375175	0.375175	0.375175	0.375175	0.375175	0.375175	0.375175	0.375175	0.375175	0.375175	0.375175	0.375175	0.375175	0.375175	0.375175	0.375175	0.375175	0.375175	0.375175	0.375175	0.375175	0.375175	0.375175	0.375175	0.375175	0.375175	0.375175	0.375175	0.375175	0.690796	0.690796	0.375175	0.375175	0.375175
54	clusters	0.325562	0.325562	0.325562	0.325562	0.325562	0.664181	0.325562	0.325562	0.325562	0.664181	0.664181	0.664181	0.325562	0.325562	0.325562	0.325562	0.325562	0.325562	0.325562	0.325562	0.325562	0.325562	0.325562	0.325562	0.325562	0.325562	0.325562	0.325562	0.325562	0.325562	0.325562	0.325562	0.325562	0.325562	0.325562	0.325562	0.325562	0.325562	0.325562	0.325562	0.325562	0.325562	0.325562	0.664181	0.664181	0.325562	0.325562	0.325562
55	fret	0.260157	0.376412	0.30327	0.412458	0.263165	0.110591	0.306277	0.176874	0.139722	0.27921	0.28322	0.334338	0.336342	0.42447	0.255142	0.813914	0.687295	0.293246	0.225048	0.760099	0.683304	0.697272	0.598447	0.60444	0.443485	0.298258	0.623414	0.741156	0.71822	0.780034	0.671329	0.581465	0.818895	0.407452	0.487503	0.542494	0.223041	0.301265	0.54949	0.579467	0.462496	0.422468	0.459494	0.761096	0.390431	0.222038	0.547491	0.691286
55	states	0.374409	0.374409	0.374409	0.374409	0.374409	0.374409	0.374409	0.374409	0.374409	0.374409	0.374409	0.374409	0.374409	0.374409	0.374409	0.681807	0.681807	0.374409	0.374409	0.681807	0.681807	0.681807	0.681807	0.681807	0.374409	0.374409	0.681807	0.681807	0.681807	0.681807	0.681807	0.681807	0.681807	0.374409	0.374409	0.374409	0.374409	0.374409	0.374409	0.681807	0.374409	0.374409	0.374409	0.681807	0.374409	0.374409	0.681807	0.681807
55	clusters	0.325562	0.325562	0.325562	0.325562	0.325562	0.325562	0.325562	0.325562	0.325562	0.325562	0.325562	0.325562	0.325562	0.325562	0.325562	0.664181	0.664181	0.325562	0.325562	0.664181	0.664181	0.664181	0.664181	0.664181	0.325562	0.325562	0.664181	0.664181	0.664181	0.664181	0.664181	0.664181	0.664181	0.325562	0.325562	0.325562	0.325562	0.325562	0.325562	0.664181	0.325562	0.325562	0.325562	0.664181	0.325562	0.325562	0.664181	0.664181
56	fret	0.263795	0.288079	0.351849	0.108686	0.395226	0.398308	0.360144	0.157736	0.308044	0.187987	0.325825	0.389056	0.317465	0.280703	0.303846	0.302796	0.350811	0.36118	0.352887	0.317465	0.339377	0.149054	0.362216	0.407542	0.301747	0.206255	0.272257	0.373595	0.279648	0.201963	0.0988119	0.346656	0.327912	0.389056	0.349773	0.268028	0.65841	0.753081	0.284919	0.401388	0.375661	0.279648	0.350811	0.450374	0.399335	0.216967	0.324781	0.349773
56	states	0.313279	0.313279	0.313279	0.313279	0.313279	0.313279	0.313279	0.313279	0.313279	0.313279	0.313279	0.313279	0.313279	0.313279	0.313279	0.313279	0.313279	0.313279	0.313279	0.313279	0.313279	0.313279	0.313279	0.313279	0.313279	0.313279	0.313279	0.313279	0.313279	0.313279	0.313279	0.313279	0.313279	0.313279	0.313279	0.313279	0.74077	0.74077	0.313279	0.313279	0.313279	0.313279	0.313279	0.313279	0.313279	0.313279	0.313279	0.313279
56	clusters	0.325562	0.325562	0.325562	0.325562	0.325562	0.325562	0.325562	0.325562	0.325562	0.325562	0.325562	0.325562	0.325562	0.325562	0.325562	0.325562	0.325562	0.325562	0.325562	0.325562	0.325562	0.325562	0.325562	0.325562	0.325562	0.325562	0.325562	0.325562	0.325562	0.325562	0.325562	0.325562	0.325562	0.325562	0.325562	0.325562	0.664181	0.664181	0.325562	0.325562	0.325562	0.325562	0.325562	0.325562	0.325562	0.325562	0.325562	0.325562
57	fret	0.696997	0.730332	0.604303	0.189516	0.299425	0.20847	0.24371	0.325557	0.215119	0.244666	0.32168	0.283034	0.394898	0.256148	0.217971	0.297494	0.319741	0.347924	0.28785	0.393916	0.352798	0.297494	0.369403	0.39195	0.252318	0.415579	0.708433	0.369403	0.182901	0.379195	0.380175	0.344028	0.291705	0.260939	0.339162	0.253275	0.252318	0.42941	0.778602	0.534278	0.341108	0.343054	0.329443	0.207521	0.245622	0.326528	0.591042	0.731377
57	states	0.696997	0.696997	0.696997	0.319741	0.319741	0.319741	0.319741	0.319741	0.319741	0.319741	0.319741	0.319741	0.319741	0.319741	0.319741	0.319741	0.319741	0.319741	0.319741	0.319741	0.319741	0.319741	0.319741	0.319741	0.319741	0.319741	0.696997	0.319741	0.319741	0.319741	0.319741	0.319741	0.319741	0.319741	0.319741	0.319741	0.319741	0.319741	0.696997	0.696997	0.319741	0.319741	0.319741	0.319741	0.319741	0.319741	0.696997	0.696997
57	clusters	0.664181	0.664181	0.664181	0.325562	0.325562	0.325562	0.325562	0.325562	0.325562	0.325562	0.325562	0.325562	0.325562	0.325562	0.325562	0.325562	0.325562	0.325562	0.325562	0.325562	0.325562	0.325562	0.325562	0.325562	0.325562	0.325562	0.664181	0.325562	0.325562	0.325562	0.325562	0.325562	0.325562	0.325562	0.325562	0.325562	0.325562	0.325562	0.664181	0.664181	0.325562	0.325562	0.325562	0.325562	0.325562	0.325562	0.664181	0.664181
[truncated: 1,106 more columns]
