# Supplementary material for: Conformational dynamics of auto-inhibition in the ER calcium sensor STIM1
Source: eLife. 2021 Nov 3;10:e66194. doi: 10.7554/eLife.66194 (PMC8651296; doi:10.7554/eLife.66194)
Supplement: Figure 4—figure supplement 1—source data 1. [file elife-66194-fig4-figsupp1-data1.xlsx]

## Sheet: 307-307_inter_liposome
1	fret	0.842297	0.696195	0.835306	0.751794	0.728287	0.928961	0.879919	0.768724	0.77892	0.732747	0.81445	0.703903	0.820226	0.73498	0.729402	0.809839	0.761938	0.772124	0.791481	0.831818	1.0325	0.910908	1.1312	0.746176	0.885849	0.985139	0.806386	0.844632	0.881104	0.815604	0.65478	0.858687	0.723835	0.813296	0.971592	0.817914	0.944712	0.774393	0.921724	0.749545	0.75517	0.72606	0.878735	0.780058	0.906115	0.890603	0.839965	0.891793
1	states	0.824277	0.824277	0.824277	0.824277	0.824277	0.824277	0.824277	0.824277	0.824277	0.824277	0.824277	0.824277	0.824277	0.824277	0.824277	0.824277	0.824277	0.824277	0.824277	0.824277	0.824277	0.824277	0.824277	0.824277	0.824277	0.824277	0.824277	0.824277	0.824277	0.824277	0.824277	0.824277	0.824277	0.824277	0.824277	0.824277	0.824277	0.824277	0.824277	0.824277	0.824277	0.824277	0.824277	0.824277	0.824277	0.824277	0.824277	0.824277
1	clusters	0.808561	0.808561	0.808561	0.808561	0.808561	0.808561	0.808561	0.808561	0.808561	0.808561	0.808561	0.808561	0.808561	0.808561	0.808561	0.808561	0.808561	0.808561	0.808561	0.808561	0.808561	0.808561	0.808561	0.808561	0.808561	0.808561	0.808561	0.808561	0.808561	0.808561	0.808561	0.808561	0.808561	0.808561	0.808561	0.808561	0.808561	0.808561	0.808561	0.808561	0.808561	0.808561	0.808561	0.808561	0.808561	0.808561	0.808561	0.808561
2	fret	0.904361	0.815113	0.965227	0.726884	0.845615	0.87147	0.691506	0.988796	0.836661	0.948782	0.855909	0.887178	0.738854	0.648936	0.933846	0.813854	0.742462	0.731661	0.723311	0.846899	0.808829	0.987401	0.874078	0.742462	0.42555	0.169622	0.152661	0.0861805	0.150256	0.187628	0.151859	0.122518	0.0642636	0.190928	0.138296	0.140679	0.139884	0.0397765	0.171249	0.184336	0.125658	0.163135	0.118603	0.10848	0.189277	0.104604	0.364269	0.0501069
2	states	0.846257	0.846257	0.846257	0.846257	0.846257	0.846257	0.846257	0.846257	0.846257	0.846257	0.846257	0.846257	0.846257	0.846257	0.846257	0.846257	0.846257	0.846257	0.846257	0.846257	0.846257	0.846257	0.846257	0.846257	0.588826	0.138296	0.138296	0.138296	0.138296	0.138296	0.138296	0.138296	0.138296	0.138296	0.138296	0.138296	0.138296	0.138296	0.138296	0.138296	0.138296	0.138296	0.138296	0.138296	0.138296	0.138296	0.138296	0.138296
2	clusters	0.808561	0.808561	0.808561	0.808561	0.808561	0.808561	0.808561	0.808561	0.808561	0.808561	0.808561	0.808561	0.808561	0.808561	0.808561	0.808561	0.808561	0.808561	0.808561	0.808561	0.808561	0.808561	0.808561	0.808561	0.588853	0.0953053	0.0953053	0.0953053	0.0953053	0.0953053	0.0953053	0.0953053	0.0953053	0.0953053	0.0953053	0.0953053	0.0953053	0.0953053	0.0953053	0.0953053	0.0953053	0.0953053	0.0953053	0.0953053	0.0953053	0.0953053	0.0953053	0.0953053
3	fret	0.489069	0.349658	0.3097	0.448209	0.416503	0.294177	0.405641	0.417491	0.482074	0.301934	0.409588	0.45119	0.406627	0.368263	0.464123	0.414526	0.386924	0.388888	0.305816	0.355528	0.382008	0.375132	0.347703	0.345749	0.405641	0.28643	0.477082	0.449202	0.495071	0.325263	0.415514	0.393813	0.352592	0.481075	0.350636	0.560462	0.452184	0.453178	0.549344	0.435309	0.188499	0.459145	0.421446	0.365322	0.359443	0.459145	0.334034	0.329157
3	states	0.380534	0.380534	0.380534	0.380534	0.380534	0.380534	0.380534	0.380534	0.380534	0.380534	0.380534	0.380534	0.380534	0.380534	0.380534	0.380534	0.380534	0.380534	0.380534	0.380534	0.380534	0.380534	0.380534	0.380534	0.380534	0.380534	0.380534	0.380534	0.380534	0.380534	0.380534	0.380534	0.380534	0.380534	0.380534	0.380534	0.380534	0.380534	0.380534	0.380534	0.380534	0.380534	0.380534	0.380534	0.380534	0.380534	0.380534	0.380534
3	clusters	0.353203	0.353203	0.353203	0.353203	0.353203	0.353203	0.353203	0.353203	0.353203	0.353203	0.353203	0.353203	0.353203	0.353203	0.353203	0.353203	0.353203	0.353203	0.353203	0.353203	0.353203	0.353203	0.353203	0.353203	0.353203	0.353203	0.353203	0.353203	0.353203	0.353203	0.353203	0.353203	0.353203	0.353203	0.353203	0.353203	0.353203	0.353203	0.353203	0.353203	0.353203	0.353203	0.353203	0.353203	0.353203	0.353203	0.353203	0.353203
4	fret	0.438359	0.51461	0.428279	0.376698	0.458486	0.594195	0.462507	0.426261	0.623862	0.65048	0.62781	0.587259	0.402019	0.467529	0.668182	0.572378	0.436344	0.62781	0.5226	0.49961	0.581313	0.62781	0.489597	0.468534	0.457481	0.757153	0.703487	0.399995	0.568406	0.605084	0.473553	0.518606	0.459492	0.539555	0.533574	0.463511	0.549514	0.54354	0.565425	0.608052	0.68585	0.373655	0.391899	0.470542	0.437351	0.657368	0.546527	0.509613
4	states	0.521102	0.521102	0.521102	0.521102	0.521102	0.521102	0.521102	0.521102	0.521102	0.521102	0.521102	0.521102	0.521102	0.521102	0.521102	0.521102	0.521102	0.521102	0.521102	0.521102	0.521102	0.521102	0.521102	0.521102	0.521102	0.521102	0.521102	0.521102	0.521102	0.521102	0.521102	0.521102	0.521102	0.521102	0.521102	0.521102	0.521102	0.521102	0.521102	0.521102	0.521102	0.521102	0.521102	0.521102	0.521102	0.521102	0.521102	0.521102
4	clusters	0.588853	0.588853	0.588853	0.588853	0.588853	0.588853	0.588853	0.588853	0.588853	0.588853	0.588853	0.588853	0.588853	0.588853	0.588853	0.588853	0.588853	0.588853	0.588853	0.588853	0.588853	0.588853	0.588853	0.588853	0.588853	0.588853	0.588853	0.588853	0.588853	0.588853	0.588853	0.588853	0.588853	0.588853	0.588853	0.588853	0.588853	0.588853	0.588853	0.588853	0.588853	0.588853	0.588853	0.588853	0.588853	0.588853	0.588853	0.588853
5	fret	0.317239	0.280295	0.240342	0.227889	0.213944	0.382533	0.319029	0.204206	0.527119	0.555142	0.298616	0.235344	0.346213	0.310998	0.312765	0.286369	0.299496	0.314548	0.374051	0.232024	0.193754	0.357268	0.136125	0.51545	0.218027	0.268244	0.263971	0.178659	0.481088	0.412226	0.396808	0.400644	0.288982	0.369365	0.24285	0.373112	0.256321	0.285499	0.3703	0.383479	0.581573	0.469825	0.217209	0.395851	0.443674	0.53139	0.328019	0.292476
5	states	0.313657	0.313657	0.313657	0.313657	0.313657	0.313657	0.313657	0.313657	0.313657	0.313657	0.313657	0.313657	0.313657	0.313657	0.313657	0.313657	0.313657	0.313657	0.313657	0.313657	0.313657	0.313657	0.313657	0.313657	0.313657	0.313657	0.313657	0.313657	0.313657	0.313657	0.313657	0.313657	0.313657	0.313657	0.313657	0.313657	0.313657	0.313657	0.313657	0.313657	0.313657	0.313657	0.313657	0.313657	0.313657	0.313657	0.313657	0.313657
5	clusters	0.353203	0.353203	0.353203	0.353203	0.353203	0.353203	0.353203	0.353203	0.353203	0.353203	0.353203	0.353203	0.353203	0.353203	0.353203	0.353203	0.353203	0.353203	0.353203	0.353203	0.353203	0.353203	0.353203	0.353203	0.353203	0.353203	0.353203	0.353203	0.353203	0.353203	0.353203	0.353203	0.353203	0.353203	0.353203	0.353203	0.353203	0.353203	0.353203	0.353203	0.353203	0.353203	0.353203	0.353203	0.353203	0.353203	0.353203	0.353203
6	fret	0.334907	0.286263	0.356657	0.354823	0.567162	0.262986	0.490368	0.345712	0.310226	0.449622	0.274541	0.476582	0.531896	0.441488	0.6407	0.480801	0.433402	0.309358	0.293038	0.5824	0.406751	0.455772	0.423452	0.317203	0.312836	0.367746	0.480801	0.385603	0.562533	0.433402	0.317203	0.318957	0.24516	0.368676	0.426409	0.286263	0.298157	0.282042	0.420482	0.417521	0.302447	0.465077	0.299013	0.238776	0.360337	0.615983	0.441488	0.431398
6	states	0.367746	0.367746	0.367746	0.367746	0.367746	0.367746	0.367746	0.367746	0.367746	0.367746	0.367746	0.367746	0.367746	0.367746	0.367746	0.367746	0.367746	0.367746	0.367746	0.367746	0.367746	0.367746	0.367746	0.367746	0.367746	0.367746	0.367746	0.367746	0.367746	0.367746	0.367746	0.367746	0.367746	0.367746	0.367746	0.367746	0.367746	0.367746	0.367746	0.367746	0.367746	0.367746	0.367746	0.367746	0.367746	0.367746	0.367746	0.367746
6	clusters	0.353203	0.353203	0.353203	0.353203	0.353203	0.353203	0.353203	0.353203	0.353203	0.353203	0.353203	0.353203	0.353203	0.353203	0.353203	0.353203	0.353203	0.353203	0.353203	0.353203	0.353203	0.353203	0.353203	0.353203	0.353203	0.353203	0.353203	0.353203	0.353203	0.353203	0.353203	0.353203	0.353203	0.353203	0.353203	0.353203	0.353203	0.353203	0.353203	0.353203	0.353203	0.353203	0.353203	0.353203	0.353203	0.353203	0.353203	0.353203
7	fret	0.683122	0.70109	0.680744	0.726639	0.752626	0.603332	0.484222	0.535491	0.627145	0.667736	0.636317	0.748879	0.628288	0.488332	0.539766	0.552676	0.432939	0.438867	0.454809	0.445817	0.388402	0.672452	0.515371	0.54513	0.579982	0.410473	0.413381	0.470935	0.620305	0.677184	0.714415	0.76648	0.548359	0.716851	0.863067	0.419216	0.635167	0.592175	0.736495	0.636317	0.672452	0.603332	0.680744	0.520636	0.82708	0.660691	0.54513	0.784267
7	states	0.737113	0.737113	0.737113	0.737113	0.737113	0.542982	0.542982	0.542982	0.542982	0.542982	0.542982	0.542982	0.542982	0.542982	0.542982	0.542982	0.542982	0.542982	0.542982	0.542982	0.542982	0.542982	0.542982	0.542982	0.542982	0.542982	0.542982	0.542982	0.542982	0.737113	0.737113	0.737113	0.737113	0.737113	0.737113	0.542982	0.542982	0.542982	0.737113	0.737113	0.737113	0.737113	0.737113	0.737113	0.737113	0.737113	0.737113	0.737113
7	clusters	0.808561	0.808561	0.808561	0.808561	0.808561	0.588853	0.588853	0.588853	0.588853	0.588853	0.588853	0.588853	0.588853	0.588853	0.588853	0.588853	0.588853	0.588853	0.588853	0.588853	0.588853	0.588853	0.588853	0.588853	0.588853	0.588853	0.588853	0.588853	0.588853	0.808561	0.808561	0.808561	0.808561	0.808561	0.808561	0.588853	0.588853	0.588853	0.808561	0.808561	0.808561	0.808561	0.808561	0.808561	0.808561	0.808561	0.808561	0.808561
8	fret	0.700765	0.809558	1.14395	0.892467	0.779747	0.890296	1.00222	0.931704	0.813831	0.97566	0.865398	0.9066	1.1508	0.960232	1.15424	1.07035	1.21864	0.796751	1.27448	0.805288	0.879455	0.841697	0.943754	0.871881	0.765966	1.199	1.12233	0.834179	0.703901	0.819178	0.804221	0.947045	0.852456	0.835253	0.87729	0.696588	0.8708	1.35819	1.07372	0.869719	0.881622	0.773382	0.842772	0.852456	0.749058	0.945948	0.8374	0.8374
8	states	0.881622	0.881622	0.881622	0.881622	0.881622	0.881622	0.881622	0.881622	0.881622	0.881622	0.881622	0.881622	0.881622	0.881622	0.881622	0.881622	0.881622	0.881622	0.881622	0.881622	0.881622	0.881622	0.881622	0.881622	0.881622	0.881622	0.881622	0.881622	0.881622	0.881622	0.881622	0.881622	0.881622	0.881622	0.881622	0.881622	0.881622	0.881622	0.881622	0.881622	0.881622	0.881622	0.881622	0.881622	0.881622	0.881622	0.881622	0.881622
8	clusters	0.808561	0.808561	0.808561	0.808561	0.808561	0.808561	0.808561	0.808561	0.808561	0.808561	0.808561	0.808561	0.808561	0.808561	0.808561	0.808561	0.808561	0.808561	0.808561	0.808561	0.808561	0.808561	0.808561	0.808561	0.808561	0.808561	0.808561	0.808561	0.808561	0.808561	0.808561	0.808561	0.808561	0.808561	0.808561	0.808561	0.808561	0.808561	0.808561	0.808561	0.808561	0.808561	0.808561	0.808561	0.808561	0.808561	0.808561	0.808561
9	fret	0.560025	1.08146	0.704642	0.750878	0.841579	0.758869	0.60645	0.762303	0.765742	0.881078	0.668122	0.718075	0.621435	0.728203	0.803924	0.833288	0.601124	0.689074	0.662641	0.714709	0.770335	0.524832	0.593689	0.664832	0.668122	0.665928	0.554813	0.607517	0.694622	0.570488	0.591569	0.791124	0.604318	0.680228	0.619288	0.762303	0.807428	0.710229	0.672516	0.833288	0.722571	0.750878	0.626813	0.712468	0.787646	0.637591	0.753158	0.736113
9	states	0.736113	0.736113	0.736113	0.736113	0.736113	0.736113	0.736113	0.736113	0.736113	0.736113	0.736113	0.736113	0.736113	0.736113	0.736113	0.736113	0.736113	0.736113	0.736113	0.736113	0.736113	0.736113	0.736113	0.736113	0.736113	0.736113	0.736113	0.736113	0.736113	0.736113	0.736113	0.736113	0.736113	0.736113	0.736113	0.736113	0.736113	0.736113	0.736113	0.736113	0.736113	0.736113	0.736113	0.736113	0.736113	0.736113	0.736113	0.736113
9	clusters	0.808561	0.808561	0.808561	0.808561	0.808561	0.808561	0.808561	0.808561	0.808561	0.808561	0.808561	0.808561	0.808561	0.808561	0.808561	0.808561	0.808561	0.808561	0.808561	0.808561	0.808561	0.808561	0.808561	0.808561	0.808561	0.808561	0.808561	0.808561	0.808561	0.808561	0.808561	0.808561	0.808561	0.808561	0.808561	0.808561	0.808561	0.808561	0.808561	0.808561	0.808561	0.808561	0.808561	0.808561	0.808561	0.808561	0.808561	0.808561
10	fret	0.812708	0.640335	0.68721	0.735354	0.807526	0.682099	0.545293	0.704594	0.725089	0.630177	0.571482	0.816852	0.65763	0.61192	0.59977	0.731246	0.670878	0.775496	0.500145	0.590667	0.839677	0.62003	0.622058	0.534236	0.720986	0.696409	0.590667	0.675975	0.711762	0.685163	0.557368	0.589657	0.975721	0.622058	0.672918	0.714836	0.624087	0.750772	0.77756	0.711762	0.590667	0.417461	0.645418	0.631192	0.718936	0.522189	0.591678	0.528211
10	states	0.630177	0.630177	0.630177	0.630177	0.630177	0.630177	0.630177	0.630177	0.630177	0.630177	0.630177	0.630177	0.630177	0.630177	0.630177	0.630177	0.630177	0.630177	0.630177	0.630177	0.630177	0.630177	0.630177	0.630177	0.630177	0.630177	0.630177	0.630177	0.630177	0.630177	0.630177	0.630177	0.630177	0.630177	0.630177	0.630177	0.630177	0.630177	0.630177	0.630177	0.630177	0.630177	0.630177	0.630177	0.630177	0.630177	0.630177	0.630177
10	clusters	0.588853	0.588853	0.588853	0.588853	0.588853	0.588853	0.588853	0.588853	0.588853	0.588853	0.588853	0.588853	0.588853	0.588853	0.588853	0.588853	0.588853	0.588853	0.588853	0.588853	0.588853	0.588853	0.588853	0.588853	0.588853	0.588853	0.588853	0.588853	0.588853	0.588853	0.588853	0.588853	0.588853	0.588853	0.588853	0.588853	0.588853	0.588853	0.588853	0.588853	0.588853	0.588853	0.588853	0.588853	0.588853	0.588853	0.588853	0.588853
11	fret	0.81847	0.919608	0.676116	0.670833	0.816941	0.812369	0.81847	0.74331	0.697548
11	states	0.812369	0.812369	0.812369	0.812369	0.812369	0.812369	0.812369	0.812369	0.812369
11	clusters	0.808561	0.808561	0.808561	0.808561	0.808561	0.808561	0.808561	0.808561	0.808561
12	fret	0.670663	0.600678	0.60722	0.58767	0.649252	0.803773	0.839615	0.773442	0.963582	0.740079	0.644778	0.686613	0.780675	0.778261	0.787937	1.02878	0.6809	0.663873	0.749547	0.77224	0.73772	0.650372	0.633645	0.729488	0.706181	0.644778	0.83712	0.701557	0.676343	0.797665	0.730662	0.600678	0.725972	0.75549	0.738899	0.645895	0.860963	0.749547	0.768611	0.693494	0.601766	0.721295	0.52307	0.723632	0.762623	0.975643	0.993202	0.784302
12	states	0.75014	0.75014	0.75014	0.75014	0.75014	0.75014	0.75014	0.75014	0.75014	0.75014	0.75014	0.75014	0.75014	0.75014	0.75014	0.75014	0.75014	0.75014	0.75014	0.75014	0.75014	0.75014	0.75014	0.75014	0.75014	0.75014	0.75014	0.75014	0.75014	0.75014	0.75014	0.75014	0.75014	0.75014	0.75014	0.75014	0.75014	0.75014	0.75014	0.75014	0.75014	0.75014	0.75014	0.75014	0.75014	0.75014	0.75014	0.75014
12	clusters	0.808561	0.808561	0.808561	0.808561	0.808561	0.808561	0.808561	0.808561	0.808561	0.808561	0.808561	0.808561	0.808561	0.808561	0.808561	0.808561	0.808561	0.808561	0.808561	0.808561	0.808561	0.808561	0.808561	0.808561	0.808561	0.808561	0.808561	0.808561	0.808561	0.808561	0.808561	0.808561	0.808561	0.808561	0.808561	0.808561	0.808561	0.808561	0.808561	0.808561	0.808561	0.808561	0.808561	0.808561	0.808561	0.808561	0.808561	0.808561
13	fret	0.392653	0.621896	0.655544	0.545113	0.214483	0.452346	0.660154	0.5128	0.391546	0.288443	0.604764	0.349991	0.287258	0.282509	0.413543	0.520946	0.369224	0.264572	0.65739	0.51993	0.499464	0.474522	0.472424	0.398179	0.557046	0.370348	0.497402	0.484966	0.331666	0.46189	0.508709	0.601888	0.51993	0.355673	0.392653	0.259754	0.535092	0.586451	0.442739	0.39376	0.598044	0.522975	0.525002	0.442739	0.50358	0.527025	0.745774	0.455534
13	states	0.502553	0.502553	0.502553	0.502553	0.502553	0.502553	0.502553	0.502553	0.502553	0.502553	0.502553	0.502553	0.502553	0.502553	0.502553	0.502553	0.502553	0.502553	0.502553	0.502553	0.502553	0.502553	0.502553	0.502553	0.502553	0.502553	0.502553	0.502553	0.502553	0.502553	0.502553	0.502553	0.502553	0.502553	0.502553	0.502553	0.502553	0.502553	0.502553	0.502553	0.502553	0.502553	0.502553	0.502553	0.502553	0.502553	0.502553	0.502553
13	clusters	0.588853	0.588853	0.588853	0.588853	0.588853	0.588853	0.588853	0.588853	0.588853	0.588853	0.588853	0.588853	0.588853	0.588853	0.588853	0.588853	0.588853	0.588853	0.588853	0.588853	0.588853	0.588853	0.588853	0.588853	0.588853	0.588853	0.588853	0.588853	0.588853	0.588853	0.588853	0.588853	0.588853	0.588853	0.588853	0.588853	0.588853	0.588853	0.588853	0.588853	0.588853	0.588853	0.588853	0.588853	0.588853	0.588853	0.588853	0.588853
14	fret	0.944457	0.837052	0.837052	1.00143	0.866722	0.824833	0.88952	0.820735	0.981271	0.892634	0.942962	0.784126	0.88952	0.827285	0.683562	0.248234	0.182944	0.133205	0.18797	0.977637	0.948931	0.927917	0.821555	0.957833	0.926402	0.88718	0.982722	0.919566	0.786654	0.814152	0.829734	0.981271	0.891856	1.04701	0.901931	0.864341	0.757753	0.904245	0.773968	0.736939	0.837052	0.861185	0.708725	0.863572	0.81827	0.77821	0.853172	0.90886
14	states	0.876951	0.876951	0.876951	0.876951	0.876951	0.876951	0.876951	0.876951	0.876951	0.876951	0.876951	0.876951	0.876951	0.876951	0.876951	0.185457	0.185457	0.185457	0.185457	0.876951	0.876951	0.876951	0.876951	0.876951	0.876951	0.876951	0.876951	0.876951	0.876951	0.876951	0.876951	0.876951	0.876951	0.876951	0.876951	0.876951	0.876951	0.876951	0.876951	0.876951	0.876951	0.876951	0.876951	0.876951	0.876951	0.876951	0.876951	0.876951
14	clusters	0.808561	0.808561	0.808561	0.808561	0.808561	0.808561	0.808561	0.808561	0.808561	0.808561	0.808561	0.808561	0.808561	0.808561	0.808561	0.0953053	0.0953053	0.0953053	0.0953053	0.808561	0.808561	0.808561	0.808561	0.808561	0.808561	0.808561	0.808561	0.808561	0.808561	0.808561	0.808561	0.808561	0.808561	0.808561	0.808561	0.808561	0.808561	0.808561	0.808561	0.808561	0.808561	0.808561	0.808561	0.808561	0.808561	0.808561	0.808561	0.808561
15	fret	0.320227	0.439051	0.315437	0.282992	0.522978	0.443998	0.137509	0.172445	0.232011	0.41441	0.457881	0.415393	0.188178	0.0515425	0.0345802	0.436086	0.591199	0.337538	0.202113	0.0461777	0.0613976	0.0902134	0.0114915	0.127454	0.130195	0.0784806	0.0310189	0.0578109	0.0132625	0.0560189	0.0667839	0.165064	0.0766779	0.136594	0.0506478	0.0802833	0.109243	0.0622948	0.0757782	0.0757782	0.0667839	0.0319089	0.0479651	0.0838913	0.103796	0.13385	0.101076	0.0838913
15	states	0.440535	0.440535	0.440535	0.440535	0.440535	0.440535	0.0802833	0.0802833	0.0802833	0.440535	0.440535	0.440535	0.0802833	0.0802833	0.0802833	0.440535	0.440535	0.440535	0.0802833	0.0802833	0.0802833	0.0802833	0.0802833	0.0802833	0.0802833	0.0802833	0.0802833	0.0802833	0.0802833	0.0802833	0.0802833	0.0802833	0.0802833	0.0802833	0.0802833	0.0802833	0.0802833	0.0802833	0.0802833	0.0802833	0.0802833	0.0802833	0.0802833	0.0802833	0.0802833	0.0802833	0.0802833	0.0802833
15	clusters	0.353203	0.353203	0.353203	0.353203	0.353203	0.353203	0.0953053	0.0953053	0.0953053	0.353203	0.353203	0.353203	0.0953053	0.0953053	0.0953053	0.353203	0.353203	0.353203	0.0953053	0.0953053	0.0953053	0.0953053	0.0953053	0.0953053	0.0953053	0.0953053	0.0953053	0.0953053	0.0953053	0.0953053	0.0953053	0.0953053	0.0953053	0.0953053	0.0953053	0.0953053	0.0953053	0.0953053	0.0953053	0.0953053	0.0953053	0.0953053	0.0953053	0.0953053	0.0953053	0.0953053	0.0953053	0.0953053
16	fret	0.477759	0.690503	0.453575	0.591151	0.681079	0.472682	0.392038	0.519087	0.563828	0.528555	0.623516	0.605545	0.564911	0.558426	0.512811	0.608893	0.545546	0.597787	0.479795	0.438665	0.594465	0.670549	0.521186	0.478777	0.551972	0.504487	0.522236	0.532783	0.542345	0.678732	0.573604	0.50345	0.440644	0.4626	0.59336	0.478777	0.507603	0.542345	0.57797	0.594465	0.470673	0.486964	0.543411	0.489014	0.61449	0.543411	0.602229	0.543411
16	states	0.550899	0.550899	0.550899	0.550899	0.550899	0.550899	0.550899	0.550899	0.550899	0.550899	0.550899	0.550899	0.550899	0.550899	0.550899	0.550899	0.550899	0.550899	0.550899	0.550899	0.550899	0.550899	0.550899	0.550899	0.550899	0.550899	0.550899	0.550899	0.550899	0.550899	0.550899	0.550899	0.550899	0.550899	0.550899	0.550899	0.550899	0.550899	0.550899	0.550899	0.550899	0.550899	0.550899	0.550899	0.550899	0.550899	0.550899	0.550899
16	clusters	0.588853	0.588853	0.588853	0.588853	0.588853	0.588853	0.588853	0.588853	0.588853	0.588853	0.588853	0.588853	0.588853	0.588853	0.588853	0.588853	0.588853	0.588853	0.588853	0.588853	0.588853	0.588853	0.588853	0.588853	0.588853	0.588853	0.588853	0.588853	0.588853	0.588853	0.588853	0.588853	0.588853	0.588853	0.588853	0.588853	0.588853	0.588853	0.588853	0.588853	0.588853	0.588853	0.588853	0.588853	0.588853	0.588853	0.588853	0.588853
17	fret	0.506645	0.442736	0.58893	0.531684	0.671669	0.647406	0.913391	0.584906	0.553754	0.816034	0.662566	0.799698	0.757918	0.702054	0.677741	0.61814	0.857974	0.606046	0.702054	0.541712	0.662566	0.854902	0.735548	0.628225	0.675717	0.873348	0.640336	0.954572	0.587924	0.77319	0.452704	0.702054	0.628225	0.775228	0.541712	0.598996	0.71524	0.657511	0.617132	0.644376	0.727421	0.638317	0.597989	0.720314	0.684826	0.600003	0.591949	0.739613
17	states	0.661049	0.661049	0.661049	0.661049	0.661049	0.661049	0.661049	0.661049	0.661049	0.661049	0.661049	0.661049	0.661049	0.661049	0.661049	0.661049	0.661049	0.661049	0.661049	0.661049	0.661049	0.661049	0.661049	0.661049	0.661049	0.661049	0.661049	0.661049	0.661049	0.661049	0.661049	0.661049	0.661049	0.661049	0.661049	0.661049	0.661049	0.661049	0.661049	0.661049	0.661049	0.661049	0.661049	0.661049	0.661049	0.661049	0.661049	0.661049
17	clusters	0.588853	0.588853	0.588853	0.588853	0.588853	0.588853	0.588853	0.588853	0.588853	0.588853	0.588853	0.588853	0.588853	0.588853	0.588853	0.588853	0.588853	0.588853	0.588853	0.588853	0.588853	0.588853	0.588853	0.588853	0.588853	0.588853	0.588853	0.588853	0.588853	0.588853	0.588853	0.588853	0.588853	0.588853	0.588853	0.588853	0.588853	0.588853	0.588853	0.588853	0.588853	0.588853	0.588853	0.588853	0.588853	0.588853	0.588853	0.588853
18	fret	0.72158	0.770957	0.819704	0.821388	0.717995	-0.061	-0.0268824	0.0772444	0.15402	0.122922	0.0862107	0.700857	0.725157	0.83979	0.812106	0.695408	0.770957	0.680788	0.83646	0.74912	0.776159	0.761376	0.757878	0.863722	0.818862	0.783069	0.777024	0.784791	0.761376	0.732288	0.289699	0.72605	0.762249	0.668813	0.395633	0.106551	0.754393	0.483334	0.685371	0.621935	0.628578	0.639922	0.690853	0.72605	0.744692	0.698135	0.840621	0.744692
18	states	0.744692	0.744692	0.744692	0.744692	0.744692	0.139156	0.139156	0.139156	0.139156	0.139156	0.139156	0.744692	0.744692	0.744692	0.744692	0.744692	0.744692	0.744692	0.744692	0.744692	0.744692	0.744692	0.744692	0.744692	0.744692	0.744692	0.744692	0.744692	0.744692	0.744692	0.139156	0.744692	0.744692	0.744692	0.139156	0.139156	0.744692	0.744692	0.744692	0.744692	0.744692	0.744692	0.744692	0.744692	0.744692	0.744692	0.744692	0.744692
18	clusters	0.808561	0.808561	0.808561	0.808561	0.808561	0.0953053	0.0953053	0.0953053	0.0953053	0.0953053	0.0953053	0.808561	0.808561	0.808561	0.808561	0.808561	0.808561	0.808561	0.808561	0.808561	0.808561	0.808561	0.808561	0.808561	0.808561	0.808561	0.808561	0.808561	0.808561	0.808561	0.0953053	0.808561	0.808561	0.808561	0.0953053	0.0953053	0.808561	0.808561	0.808561	0.808561	0.808561	0.808561	0.808561	0.808561	0.808561	0.808561	0.808561	0.808561
19	fret	0.54078	0.551764	0.708736	0.635309	0.707475	0.832089	0.523426	0.556187	0.703698	0.558406	0.691195	0.618812	0.646038	0.529903	0.514849	0.662923	0.483263	0.637684	0.64245	0.608329	0.522351	0.706215	0.748503
19	states	0.635309	0.635309	0.635309	0.635309	0.635309	0.635309	0.635309	0.635309	0.635309	0.635309	0.635309	0.635309	0.635309	0.635309	0.635309	0.635309	0.635309	0.635309	0.635309	0.635309	0.635309	0.635309	0.635309
19	clusters	0.588853	0.588853	0.588853	0.588853	0.588853	0.588853	0.588853	0.588853	0.588853	0.588853	0.588853	0.588853	0.588853	0.588853	0.588853	0.588853	0.588853	0.588853	0.588853	0.588853	0.588853	0.588853	0.588853
20	fret	0.656207	0.894351	0.824394	0.876826	1.02707	0.987526	0.732383	0.801842	0.846986	0.924301	0.761959	0.84493	0.875796	0.914999	1.09499	0.867558	0.840821	0.359916	0.0936185	0.676476	0.873736	0.920166	1.09499	0.836712	0.910867	0.934645	0.985448	0.689666	0.898478	0.634958	0.757876	0.938784	1.03124	0.713042	0.229981	0.58048	0.675462	0.445293	0.426381	0.907768	1.00312	0.931541	1.10022	1.0751	0.981293	0.784442	0.785465	0.938784
20	states	0.848014	0.848014	0.848014	0.848014	0.848014	0.848014	0.848014	0.848014	0.848014	0.848014	0.848014	0.848014	0.848014	0.848014	0.848014	0.848014	0.848014	0.331267	0.331267	0.848014	0.848014	0.848014	0.848014	0.848014	0.848014	0.848014	0.848014	0.848014	0.848014	0.848014	0.848014	0.848014	0.848014	0.848014	0.331267	0.331267	0.331267	0.331267	0.331267	0.848014	0.848014	0.848014	0.848014	0.848014	0.848014	0.848014	0.848014	0.848014
20	clusters	0.808561	0.808561	0.808561	0.808561	0.808561	0.808561	0.808561	0.808561	0.808561	0.808561	0.808561	0.808561	0.808561	0.808561	0.808561	0.808561	0.808561	0.353203	0.353203	0.808561	0.808561	0.808561	0.808561	0.808561	0.808561	0.808561	0.808561	0.808561	0.808561	0.808561	0.808561	0.808561	0.808561	0.808561	0.353203	0.353203	0.353203	0.353203	0.353203	0.808561	0.808561	0.808561	0.808561	0.808561	0.808561	0.808561	0.808561	0.808561
21	fret	0.455501	0.415946	0.539724	0.582381	0.5408	0.626503	0.535429	0.477816	0.557052	0.407222	0.359886	0.607085	0.496379	0.446488	0.698635	0.594648	0.595772	0.389963	0.619617	0.489127	0.59019	0.452489	0.455501	0.413031	0.554873	0.482945	0.555962	0.619617	0.560327	0.502629	0.618472	0.502629	0.538649	0.537574	0.554873	0.451487	0.462538	0.57794	0.461528	0.557052	0.740594	0.603662	0.541877	0.490161	0.542955	0.482945	0.495341	0.536501
21	states	0.52263	0.52263	0.52263	0.52263	0.52263	0.52263	0.52263	0.52263	0.52263	0.52263	0.52263	0.52263	0.52263	0.52263	0.52263	0.52263	0.52263	0.52263	0.52263	0.52263	0.52263	0.52263	0.52263	0.52263	0.52263	0.52263	0.52263	0.52263	0.52263	0.52263	0.52263	0.52263	0.52263	0.52263	0.52263	0.52263	0.52263	0.52263	0.52263	0.52263	0.52263	0.52263	0.52263	0.52263	0.52263	0.52263	0.52263	0.52263
21	clusters	0.588853	0.588853	0.588853	0.588853	0.588853	0.588853	0.588853	0.588853	0.588853	0.588853	0.588853	0.588853	0.588853	0.588853	0.588853	0.588853	0.588853	0.588853	0.588853	0.588853	0.588853	0.588853	0.588853	0.588853	0.588853	0.588853	0.588853	0.588853	0.588853	0.588853	0.588853	0.588853	0.588853	0.588853	0.588853	0.588853	0.588853	0.588853	0.588853	0.588853	0.588853	0.588853	0.588853	0.588853	0.588853	0.588853	0.588853	0.588853
22	fret	0.0501484	0.0491059	0.0104663	0.238256	0.00523437	0.149769	0.322985	0.791695	0.794616	0.688952	0.663358	0.609017	0.541452	0.404036	0.298552	0.0574428	0.296514	0.5205	0.839307
22	states	0.0491059	0.0491059	0.0491059	0.297533	0.0491059	0.297533	0.297533	0.676155	0.676155	0.676155	0.676155	0.676155	0.676155	0.297533	0.297533	0.0491059	0.297533	0.676155	0.676155
22	clusters	0.0953053	0.0953053	0.0953053	0.353203	0.0953053	0.353203	0.353203	0.588853	0.588853	0.588853	0.588853	0.588853	0.588853	0.353203	0.353203	0.0953053	0.353203	0.588853	0.588853
23	fret	0.231166	0.281039	0.226117	0.426555	0.379393	0.11997	0.509337	0.198709	0.335677	0.284552	0.442319	0.230323	0.304939	0.386981	0.26968	0.360613	0.277536	0.30137	0.421666	0.280163	0.331111	0.350397	0.205298	0.11997	0.292491	0.428515	0.373731	0.2987	0.224439	0.604005	0.479469	0.174308	0.167882	0.197888	0.278411	0.386981	0.449274	0.131577	0.256717	0.529246	0.0955793	0.365283	0.195428	0.259301	0.283673	0.180768	0.386981	0.37279
23	states	0.310311	0.310311	0.310311	0.310311	0.310311	0.310311	0.310311	0.310311	0.310311	0.310311	0.310311	0.310311	0.310311	0.310311	0.310311	0.310311	0.310311	0.310311	0.310311	0.310311	0.310311	0.310311	0.310311	0.310311	0.310311	0.310311	0.310311	0.310311	0.310311	0.310311	0.310311	0.310311	0.310311	0.310311	0.310311	0.310311	0.310311	0.310311	0.310311	0.310311	0.310311	0.310311	0.310311	0.310311	0.310311	0.310311	0.310311	0.310311
23	clusters	0.353203	0.353203	0.353203	0.353203	0.353203	0.353203	0.353203	0.353203	0.353203	0.353203	0.353203	0.353203	0.353203	0.353203	0.353203	0.353203	0.353203	0.353203	0.353203	0.353203	0.353203	0.353203	0.353203	0.353203	0.353203	0.353203	0.353203	0.353203	0.353203	0.353203	0.353203	0.353203	0.353203	0.353203	0.353203	0.353203	0.353203	0.353203	0.353203	0.353203	0.353203	0.353203	0.353203	0.353203	0.353203	0.353203	0.353203	0.353203
24	fret	0.316673	0.228612	0.905283	0.866085	1.01168	0.971733	0.771675	-0.155658	0.0379502	0.820908	0.829754	0.258011	0.116688	0.0717345	-0.0102697	0.119749	0.0082118	-0.0195171	1.04475	0.853328	0.365084	0.0481942	0.12689	0.297476	0.42141	0.117708	0.333833	0.882754	0.75984	0.840562	0.715394	1.00292	0.742074	0.537555	0.0543379	-0.0833424	0.0143683	-0.0349393	0.1595	0.981485	0.945376	0.905283	0.888634	0.636119	0.791383	0.994155	0.581425	0.152371
24	states	0.0727574	0.0727574	0.791875	0.791875	0.791875	0.791875	0.791875	0.0727574	0.0727574	0.791875	0.791875	0.0727574	0.0727574	0.0727574	0.0727574	0.0727574	0.0727574	0.0727574	0.791875	0.791875	0.0727574	0.0727574	0.0727574	0.0727574	0.0727574	0.0727574	0.0727574	0.791875	0.791875	0.791875	0.791875	0.791875	0.791875	0.791875	0.0727574	0.0727574	0.0727574	0.0727574	0.0727574	0.791875	0.791875	0.791875	0.791875	0.791875	0.791875	0.791875	0.791875	0.0727574
24	clusters	0.0953053	0.0953053	0.808561	0.808561	0.808561	0.808561	0.808561	0.0953053	0.0953053	0.808561	0.808561	0.0953053	0.0953053	0.0953053	0.0953053	0.0953053	0.0953053	0.0953053	0.808561	0.808561	0.0953053	0.0953053	0.0953053	0.0953053	0.0953053	0.0953053	0.0953053	0.808561	0.808561	0.808561	0.808561	0.808561	0.808561	0.808561	0.0953053	0.0953053	0.0953053	0.0953053	0.0953053	0.808561	0.808561	0.808561	0.808561	0.808561	0.808561	0.808561	0.808561	0.0953053
25	fret	0.861735	1.07595	0.891404	0.966554	0.943282	0.858199	0.908176	1.03011	0.937194	0.885442	1.49273	0.995017	0.929908	0.845276	0.955504	1.06057	0.877119	1.03011	0.972714	0.860556	0.861735	1.00499	0.970248	0.98508	0.764606	0.962865	0.915399	0.819633	0.838255	1.03896	0.83592	0.883061	0.906974	0.910581	0.862915	0.861735	0.919018	0.879494	0.87356	0.948164	1.06313	1.09012	1.0263	0.802302	0.824275	0.894989
25	states	0.91299	0.91299	0.91299	0.91299	0.91299	0.91299	0.91299	0.91299	0.91299	0.91299	0.91299	0.91299	0.91299	0.91299	0.91299	0.91299	0.91299	0.91299	0.91299	0.91299	0.91299	0.91299	0.91299	0.91299	0.91299	0.91299	0.91299	0.91299	0.91299	0.91299	0.91299	0.91299	0.91299	0.91299	0.91299	0.91299	0.91299	0.91299	0.91299	0.91299	0.91299	0.91299	0.91299	0.91299	0.91299	0.91299
25	clusters	0.808561	0.808561	0.808561	0.808561	0.808561	0.808561	0.808561	0.808561	0.808561	0.808561	0.808561	0.808561	0.808561	0.808561	0.808561	0.808561	0.808561	0.808561	0.808561	0.808561	0.808561	0.808561	0.808561	0.808561	0.808561	0.808561	0.808561	0.808561	0.808561	0.808561	0.808561	0.808561	0.808561	0.808561	0.808561	0.808561	0.808561	0.808561	0.808561	0.808561	0.808561	0.808561	0.808561	0.808561	0.808561	0.808561
26	fret	0.520146	0.210101	0.43135	0.300085	0.351136	0.206355	0.398887	0.494016	0.445197	0.452137	0.417547	0.257221	0.332764	0.306793	0.360838	0.486007	0.300085	0.450153	0.521154	0.342423	0.298171	0.371535	0.294345	0.473025	0.422472	0.182083	0.195135	0.339523	0.396927	0.365697	0.279075	0.434313	0.395948	0.464061	0.335659	0.279075	0.374457
26	states	0.365697	0.365697	0.365697	0.365697	0.365697	0.365697	0.365697	0.365697	0.365697	0.365697	0.365697	0.365697	0.365697	0.365697	0.365697	0.365697	0.365697	0.365697	0.365697	0.365697	0.365697	0.365697	0.365697	0.365697	0.365697	0.365697	0.365697	0.365697	0.365697	0.365697	0.365697	0.365697	0.365697	0.365697	0.365697	0.365697	0.365697
26	clusters	0.353203	0.353203	0.353203	0.353203	0.353203	0.353203	0.353203	0.353203	0.353203	0.353203	0.353203	0.353203	0.353203	0.353203	0.353203	0.353203	0.353203	0.353203	0.353203	0.353203	0.353203	0.353203	0.353203	0.353203	0.353203	0.353203	0.353203	0.353203	0.353203	0.353203	0.353203	0.353203	0.353203	0.353203	0.353203	0.353203	0.353203
27	fret	0.65986	0.97165	1.01341	0.821267	0.903154	0.885878	0.723923	0.763756	0.747318	1.00953	0.870583	1.30518	0.910149	0.845612	0.944057	1.02904	1.05506	0.906645	0.794407	0.696848	0.814879	1.0212	0.771325	0.723923	0.581568	0.955005	0.848904	1.16317	1.17887	0.887592	0.706764	0.953172	0.651836	0.875655	0.867217	1.06724	0.595165	0.786649	0.865538	0.880753	0.894478	0.862188	0.76829	0.739943	1.06724	0.850555	0.949517	0.873962
27	states	0.891029	0.891029	0.891029	0.891029	0.891029	0.891029	0.891029	0.891029	0.891029	0.891029	0.891029	0.891029	0.891029	0.891029	0.891029	0.891029	0.891029	0.891029	0.891029	0.891029	0.891029	0.891029	0.891029	0.891029	0.891029	0.891029	0.891029	0.891029	0.891029	0.891029	0.891029	0.891029	0.891029	0.891029	0.891029	0.891029	0.891029	0.891029	0.891029	0.891029	0.891029	0.891029	0.891029	0.891029	0.891029	0.891029	0.891029	0.891029
27	clusters	0.808561	0.808561	0.808561	0.808561	0.808561	0.808561	0.808561	0.808561	0.808561	0.808561	0.808561	0.808561	0.808561	0.808561	0.808561	0.808561	0.808561	0.808561	0.808561	0.808561	0.808561	0.808561	0.808561	0.808561	0.808561	0.808561	0.808561	0.808561	0.808561	0.808561	0.808561	0.808561	0.808561	0.808561	0.808561	0.808561	0.808561	0.808561	0.808561	0.808561	0.808561	0.808561	0.808561	0.808561	0.808561	0.808561	0.808561	0.808561
28	fret	0.70006	0.69819	0.645285	0.629007	0.713108	0.611671	0.611671	0.57269	0.536121	0.437781	0.493986	0.589323	0.537116	0.509111	0.485884	0.573672	0.483855	0.637637	0.479791	0.557926	0.549027	0.53114	0.554963	0.635722	0.645285	0.492975	0.687884	0.475722	0.602942	0.551008	0.70006	0.566795	0.654812	0.651958	0.71868	0.532137	0.585419	0.559899	0.703795	0.628046	0.721461	0.60682	0.691637	0.647193	0.613604	0.496008	0.588348	0.651005
28	states	0.611671	0.611671	0.611671	0.611671	0.611671	0.611671	0.611671	0.611671	0.611671	0.611671	0.611671	0.611671	0.611671	0.611671	0.611671	0.611671	0.611671	0.611671	0.611671	0.611671	0.611671	0.611671	0.611671	0.611671	0.611671	0.611671	0.611671	0.611671	0.611671	0.611671	0.611671	0.611671	0.611671	0.611671	0.611671	0.611671	0.611671	0.611671	0.611671	0.611671	0.611671	0.611671	0.611671	0.611671	0.611671	0.611671	0.611671	0.611671
28	clusters	0.588853	0.588853	0.588853	0.588853	0.588853	0.588853	0.588853	0.588853	0.588853	0.588853	0.588853	0.588853	0.588853	0.588853	0.588853	0.588853	0.588853	0.588853	0.588853	0.588853	0.588853	0.588853	0.588853	0.588853	0.588853	0.588853	0.588853	0.588853	0.588853	0.588853	0.588853	0.588853	0.588853	0.588853	0.588853	0.588853	0.588853	0.588853	0.588853	0.588853	0.588853	0.588853	0.588853	0.588853	0.588853	0.588853	0.588853	0.588853
29	fret	0.446095	0.396457	0.287677	0.426855	0.312098	0.217092	0.453515	0.333885	0.324746	0.348627	0.366589	0.379932	0.41931	0.306316	0.254549	0.46825	0.365473	0.309787	0.433295	0.259322	0.350883	0.40302	0.248564	0.298187	0.302837	0.414982	0.382145	0.287677	0.323601	0.300514	0.381039	0.439708	0.394263	0.307474	0.388766	0.341839	0.353148	0.299351	0.277101	0.378824	0.347497	0.291188	0.328179	0.305157	0.307474	0.341839	0.435435	0.404111
29	states	0.352016	0.352016	0.352016	0.352016	0.352016	0.352016	0.352016	0.352016	0.352016	0.352016	0.352016	0.352016	0.352016	0.352016	0.352016	0.352016	0.352016	0.352016	0.352016	0.352016	0.352016	0.352016	0.352016	0.352016	0.352016	0.352016	0.352016	0.352016	0.352016	0.352016	0.352016	0.352016	0.352016	0.352016	0.352016	0.352016	0.352016	0.352016	0.352016	0.352016	0.352016	0.352016	0.352016	0.352016	0.352016	0.352016	0.352016	0.352016
29	clusters	0.353203	0.353203	0.353203	0.353203	0.353203	0.353203	0.353203	0.353203	0.353203	0.353203	0.353203	0.353203	0.353203	0.353203	0.353203	0.353203	0.353203	0.353203	0.353203	0.353203	0.353203	0.353203	0.353203	0.353203	0.353203	0.353203	0.353203	0.353203	0.353203	0.353203	0.353203	0.353203	0.353203	0.353203	0.353203	0.353203	0.353203	0.353203	0.353203	0.353203	0.353203	0.353203	0.353203	0.353203	0.353203	0.353203	0.353203	0.353203
30	fret	0.47762	0.63837	0.711144	0.444595	0.320537	0.313928	0.261476	0.464275	0.506109	0.543186	0.804315	0.715723	0.793781	0.665727	0.460138	0.591315	0.443555	0.498008	0.512166	0.485798	0.513173	0.422647	0.338066	0.474545	0.444595	0.683457	0.776989	0.781422	0.602936	0.576697	0.694576	0.558036	0.791139	0.705636	0.641216	0.841611	0.713893	0.685314	0.610649	0.590344	0.674144	0.770767	0.717551	0.658216	0.6676	0.68717	0.665727	0.625047
30	states	0.633616	0.633616	0.633616	0.633616	0.633616	0.633616	0.633616	0.633616	0.633616	0.633616	0.633616	0.633616	0.633616	0.633616	0.633616	0.633616	0.633616	0.633616	0.633616	0.633616	0.633616	0.633616	0.633616	0.633616	0.633616	0.633616	0.633616	0.633616	0.633616	0.633616	0.633616	0.633616	0.633616	0.633616	0.633616	0.633616	0.633616	0.633616	0.633616	0.633616	0.633616	0.633616	0.633616	0.633616	0.633616	0.633616	0.633616	0.633616
30	clusters	0.588853	0.588853	0.588853	0.588853	0.588853	0.588853	0.588853	0.588853	0.588853	0.588853	0.588853	0.588853	0.588853	0.588853	0.588853	0.588853	0.588853	0.588853	0.588853	0.588853	0.588853	0.588853	0.588853	0.588853	0.588853	0.588853	0.588853	0.588853	0.588853	0.588853	0.588853	0.588853	0.588853	0.588853	0.588853	0.588853	0.588853	0.588853	0.588853	0.588853	0.588853	0.588853	0.588853	0.588853	0.588853	0.588853	0.588853	0.588853
31	fret	0.437067	0.773757	0.527871	0.540323	0.515501	0.662924	0.674064	0.551811	0.541365	0.26013	0.762057	0.79387	0.540323	0.515501	0.484935	0.493037	0.439036	0.662924	0.402942	0.577124	0.441995	0.419436	0.669601	0.43019	0.692024	0.494052	0.598482	0.644132	0.514474	0.646333	0.415542	0.474859	0.547626	0.522707	0.546581	0.79031	0.545536	0.798626	0.580313	0.644132	1.0465	0.765567	0.544492	0.495054	0.539282	0.483925	0.431171	0.520645
31	states	0.560214	0.560214	0.560214	0.560214	0.560214	0.560214	0.560214	0.560214	0.560214	0.560214	0.560214	0.560214	0.560214	0.560214	0.560214	0.560214	0.560214	0.560214	0.560214	0.560214	0.560214	0.560214	0.560214	0.560214	0.560214	0.560214	0.560214	0.560214	0.560214	0.560214	0.560214	0.560214	0.560214	0.560214	0.560214	0.560214	0.560214	0.560214	0.560214	0.560214	0.560214	0.560214	0.560214	0.560214	0.560214	0.560214	0.560214	0.560214
31	clusters	0.588853	0.588853	0.588853	0.588853	0.588853	0.588853	0.588853	0.588853	0.588853	0.588853	0.588853	0.588853	0.588853	0.588853	0.588853	0.588853	0.588853	0.588853	0.588853	0.588853	0.588853	0.588853	0.588853	0.588853	0.588853	0.588853	0.588853	0.588853	0.588853	0.588853	0.588853	0.588853	0.588853	0.588853	0.588853	0.588853	0.588853	0.588853	0.588853	0.588853	0.588853	0.588853	0.588853	0.588853	0.588853	0.588853	0.588853	0.588853
32	fret	0.814224	0.932949	0.822073	0.777492	0.817585	0.89478	0.861621	0.89478	0.934113	0.65286	0.834447	0.737923	0.7412	0.817585	0.841218	0.745576	0.944609	0.767551	0.860484	0.860484	1.01669	0.599228	0.845741	0.601314	0.763144	0.708582	0.767551	0.783029	0.783029	0.757643	0.776386	0.755445	0.97395	1.05275	0.791895	0.729199	0.889037	0.817585	0.683813	0.725934	0.654984	0.828816	0.708582	0.815344	0.767551	0.70642	0.759842	0.736831
32	states	0.763144	0.763144	0.763144	0.763144	0.763144	0.763144	0.763144	0.763144	0.763144	0.763144	0.763144	0.763144	0.763144	0.763144	0.763144	0.763144	0.763144	0.763144	0.763144	0.763144	0.763144	0.763144	0.763144	0.763144	0.763144	0.763144	0.763144	0.763144	0.763144	0.763144	0.763144	0.763144	0.763144	0.763144	0.763144	0.763144	0.763144	0.763144	0.763144	0.763144	0.763144	0.763144	0.763144	0.763144	0.763144	0.763144	0.763144	0.763144
32	clusters	0.808561	0.808561	0.808561	0.808561	0.808561	0.808561	0.808561	0.808561	0.808561	0.808561	0.808561	0.808561	0.808561	0.808561	0.808561	0.808561	0.808561	0.808561	0.808561	0.808561	0.808561	0.808561	0.808561	0.808561	0.808561	0.808561	0.808561	0.808561	0.808561	0.808561	0.808561	0.808561	0.808561	0.808561	0.808561	0.808561	0.808561	0.808561	0.808561	0.808561	0.808561	0.808561	0.808561	0.808561	0.808561	0.808561	0.808561	0.808561
33	fret	0.612507	0.679304	0.676531	0.579637	0.6448	0.761451	0.518161	0.456698	0.606749	0.601936	0.646682	0.546175	0.490748	0.689436	0.601936	0.577685	0.503996	0.53422	0.325336	0.610589	0.657933	0.423091	0.484602	0.488702	0.717688	0.482549	0.50298	0.705895	0.582561	0.709532	0.680227	0.704073	0.729404	0.68115	0.779881	0.826398	0.587424	0.470184	0.455656	0.606749	0.720399	0.600008	0.545181	0.67838	0.528214	0.453572	0.392123	0.781626
33	states	0.601936	0.601936	0.601936	0.601936	0.601936	0.601936	0.601936	0.601936	0.601936	0.601936	0.601936	0.601936	0.601936	0.601936	0.601936	0.601936	0.601936	0.601936	0.601936	0.601936	0.601936	0.601936	0.601936	0.601936	0.601936	0.601936	0.601936	0.601936	0.601936	0.601936	0.601936	0.601936	0.601936	0.601936	0.601936	0.601936	0.601936	0.601936	0.601936	0.601936	0.601936	0.601936	0.601936	0.601936	0.601936	0.601936	0.601936	0.601936
33	clusters	0.588853	0.588853	0.588853	0.588853	0.588853	0.588853	0.588853	0.588853	0.588853	0.588853	0.588853	0.588853	0.588853	0.588853	0.588853	0.588853	0.588853	0.588853	0.588853	0.588853	0.588853	0.588853	0.588853	0.588853	0.588853	0.588853	0.588853	0.588853	0.588853	0.588853	0.588853	0.588853	0.588853	0.588853	0.588853	0.588853	0.588853	0.588853	0.588853	0.588853	0.588853	0.588853	0.588853	0.588853	0.588853	0.588853	0.588853	0.588853
34	fret	0.919359	0.768364	0.615121	0.864809	0.994971	0.861648	0.763254	0.684772	0.766655	0.86878	0.792913	0.823609	0.758961	0.90323	0.94056	0.860851	0.791234	0.7001	0.873531	0.935293	0.649924	0.785341	0.917067	0.907088	0.808762	0.982674	0.799609	1.00143	0.923932	0.869573	0.898585	1.02696	0.797938	0.81703	1.06293	0.771777	0.862446	0.958461	0.719693	0.945059	1.00286	0.783653	0.925452	0.926971	0.867987	0.77433	0.956237	0.869573
34	states	0.840321	0.840321	0.840321	0.840321	0.840321	0.840321	0.840321	0.840321	0.840321	0.840321	0.840321	0.840321	0.840321	0.840321	0.840321	0.840321	0.840321	0.840321	0.840321	0.840321	0.840321	0.840321	0.840321	0.840321	0.840321	0.840321	0.840321	0.840321	0.840321	0.840321	0.840321	0.840321	0.840321	0.840321	0.840321	0.840321	0.840321	0.840321	0.840321	0.840321	0.840321	0.840321	0.840321	0.840321	0.840321	0.840321	0.840321	0.840321
34	clusters	0.808561	0.808561	0.808561	0.808561	0.808561	0.808561	0.808561	0.808561	0.808561	0.808561	0.808561	0.808561	0.808561	0.808561	0.808561	0.808561	0.808561	0.808561	0.808561	0.808561	0.808561	0.808561	0.808561	0.808561	0.808561	0.808561	0.808561	0.808561	0.808561	0.808561	0.808561	0.808561	0.808561	0.808561	0.808561	0.808561	0.808561	0.808561	0.808561	0.808561	0.808561	0.808561	0.808561	0.808561	0.808561	0.808561	0.808561	0.808561
35	fret	0.794083	0.774814	1.04094	0.756812	0.94156	0.980377	0.814644	0.772557	0.845796	1.07743	0.924756	0.750093	0.476091	0.885566	0.683873	0.681695	0.614056	0.778204	0.795221	0.808916	0.63106	0.699169	0.727826	0.687143	0.752331	0.723396	0.745624	0.665423
35	states	0.764684	0.764684	0.764684	0.764684	0.764684	0.764684	0.764684	0.764684	0.764684	0.764684	0.764684	0.764684	0.764684	0.764684	0.764684	0.764684	0.764684	0.764684	0.764684	0.764684	0.764684	0.764684	0.764684	0.764684	0.764684	0.764684	0.764684	0.764684
35	clusters	0.808561	0.808561	0.808561	0.808561	0.808561	0.808561	0.808561	0.808561	0.808561	0.808561	0.808561	0.808561	0.808561	0.808561	0.808561	0.808561	0.808561	0.808561	0.808561	0.808561	0.808561	0.808561	0.808561	0.808561	0.808561	0.808561	0.808561	0.808561
36	fret	0.667	0.703342	0.642436	0.506966	0.596463	0.505941	0.622568	0.386203	0.900525	0.875182	0.583546	0.662509	0.483528	0.565408	0.673759	0.547457	0.498763	0.650215	0.606214	0.44056	0.501844	0.598626	0.802343	0.588917	0.458414	0.580331	0.60079	0.821818	0.545357	0.442534	0.659148	0.654676	0.511076	0.517258	0.683944	0.623664	0.672631	0.532812	0.68849	0.604043	0.661388	0.557994	0.571788	0.500821	0.501844	0.622568	0.457417	0.713696
36	states	0.6193	0.6193	0.6193	0.6193	0.6193	0.6193	0.6193	0.6193	0.6193	0.6193	0.6193	0.6193	0.6193	0.6193	0.6193	0.6193	0.6193	0.6193	0.6193	0.6193	0.6193	0.6193	0.6193	0.6193	0.482517	0.6193	0.6193	0.6193	0.6193	0.6193	0.6193	0.6193	0.6193	0.6193	0.6193	0.6193	0.6193	0.6193	0.6193	0.6193	0.6193	0.6193	0.6193	0.482517	0.482517	0.6193	0.6193	0.6193
36	clusters	0.588853	0.588853	0.588853	0.588853	0.588853	0.588853	0.588853	0.588853	0.588853	0.588853	0.588853	0.588853	0.588853	0.588853	0.588853	0.588853	0.588853	0.588853	0.588853	0.588853	0.588853	0.588853	0.588853	0.588853	0.588853	0.588853	0.588853	0.588853	0.588853	0.588853	0.588853	0.588853	0.588853	0.588853	0.588853	0.588853	0.588853	0.588853	0.588853	0.588853	0.588853	0.588853	0.588853	0.588853	0.588853	0.588853	0.588853	0.588853
37	fret	0.407337	0.429738	0.547279	0.385222	0.421913	0.488548	0.251165	0.230115	0.31228	0.229244	0.222299	0.117375	0.122258	0.245879	0.367165	0.241487	0.34836	0.344624	0.181198	0.176133	0.321458	0.119001	0.11494	0.347426	0.17529	0.370003	0.165213	0.169404	0.217969	0.378547	0.424843	0.253815	0.40347	0.292262	0.374744
37	states	0.370003	0.370003	0.370003	0.370003	0.370003	0.370003	0.197051	0.197051	0.197051	0.197051	0.197051	0.197051	0.197051	0.197051	0.370003	0.370003	0.370003	0.370003	0.370003	0.197051	0.370003	0.197051	0.197051	0.370003	0.370003	0.370003	0.197051	0.197051	0.197051	0.370003	0.370003	0.370003	0.370003	0.370003	0.370003
37	clusters	0.353203	0.353203	0.353203	0.353203	0.353203	0.353203	0.0953053	0.0953053	0.0953053	0.0953053	0.0953053	0.0953053	0.0953053	0.0953053	0.353203	0.353203	0.353203	0.353203	0.353203	0.0953053	0.353203	0.0953053	0.0953053	0.353203	0.353203	0.353203	0.0953053	0.0953053	0.0953053	0.353203	0.353203	0.353203	0.353203	0.353203	0.353203
38	fret	0.23351	0.274612	0.514242	0.366601	0.243039	0.414694	0.374422	0.312178	0.416667	0.448328	0.421601	0.377358	0.334461	0.395993	0.154159	0.312178	0.413708	0.338346	0.375401	0.460251	0.350993	0.44436	0.474195	0.296733	0.383236	0.471204	0.313145	0.478186	0.35489	0.409766	0.265022	0.355865	0.35684	0.298661	0.279413	0.283257	0.321854	0.319917	0.242086	0.341262	0.289991	0.324758	0.353916	0.406812	0.343206	0.297697	0.338346	0.411737
38	states	0.348072	0.348072	0.348072	0.348072	0.348072	0.348072	0.348072	0.348072	0.348072	0.348072	0.348072	0.348072	0.348072	0.348072	0.348072	0.348072	0.348072	0.348072	0.348072	0.348072	0.348072	0.348072	0.348072	0.348072	0.348072	0.348072	0.348072	0.348072	0.348072	0.348072	0.348072	0.348072	0.348072	0.348072	0.348072	0.348072	0.348072	0.348072	0.348072	0.348072	0.348072	0.348072	0.348072	0.348072	0.348072	0.348072	0.348072	0.348072
38	clusters	0.353203	0.353203	0.353203	0.353203	0.353203	0.353203	0.353203	0.353203	0.353203	0.353203	0.353203	0.353203	0.353203	0.353203	0.353203	0.353203	0.353203	0.353203	0.353203	0.353203	0.353203	0.353203	0.353203	0.353203	0.353203	0.353203	0.353203	0.353203	0.353203	0.353203	0.353203	0.353203	0.353203	0.353203	0.353203	0.353203	0.353203	0.353203	0.353203	0.353203	0.353203	0.353203	0.353203	0.353203	0.353203	0.353203	0.353203	0.353203
39	fret	0.285548	0.185448	0.27474	0.489362	0.412996	0.300992	0.350945	0.280139	0.370758	0.307388	0.200871	0.335997	0.332279	0.29371	0.34626	0.311971	0.472226	0.276538	0.365075	0.29371	0.37646	0.422734	0.22427	0.418833	0.34626	0.334137	0.30008	0.414939	0.259533	0.397522	0.327643	0.412025	0.296437	0.227764	0.464217	0.234773	0.431544	0.321173	0.423711	0.439411	0.356584	0.301904	0.175243	0.244458	0.227764	0.14333	0.253309	0.319329
39	states	0.329496	0.329496	0.329496	0.329496	0.329496	0.329496	0.329496	0.329496	0.329496	0.329496	0.329496	0.329496	0.329496	0.329496	0.329496	0.329496	0.329496	0.329496	0.329496	0.329496	0.329496	0.329496	0.329496	0.329496	0.329496	0.329496	0.329496	0.329496	0.329496	0.329496	0.329496	0.329496	0.329496	0.329496	0.329496	0.329496	0.329496	0.329496	0.329496	0.329496	0.329496	0.329496	0.329496	0.329496	0.329496	0.329496	0.329496	0.329496
39	clusters	0.353203	0.353203	0.353203	0.353203	0.353203	0.353203	0.353203	0.353203	0.353203	0.353203	0.353203	0.353203	0.353203	0.353203	0.353203	0.353203	0.353203	0.353203	0.353203	0.353203	0.353203	0.353203	0.353203	0.353203	0.353203	0.353203	0.353203	0.353203	0.353203	0.353203	0.353203	0.353203	0.353203	0.353203	0.353203	0.353203	0.353203	0.353203	0.353203	0.353203	0.353203	0.353203	0.353203	0.353203	0.353203	0.353203	0.353203	0.353203
40	fret	0.775549	0.863002	0.687957
40	states	0.775549	0.775549	0.775549
40	clusters	0.808561	0.808561	0.808561
41	fret	0.574772	0.585737	0.515956	0.719511	0.446566	0.465598	0.389143	0.636164	0.538119	0.622541	0.465598	0.718304	0.736522	0.70389	0.70389	0.561725	0.446566	0.421929	0.680177	0.445572	0.550945	0.448557	0.396784	0.477741	0.546657	0.784961	0.724351	0.510731	0.59901	0.697925	0.523304	0.452547	0.778662	0.581341	0.53175	0.412201	0.644172	0.616903	0.498273	0.57368	0.575864	0.76864	0.644172	0.651071	0.696735	0.446566	0.691985	0.714687
41	states	0.581341	0.581341	0.581341	0.581341	0.581341	0.581341	0.581341	0.581341	0.581341	0.581341	0.581341	0.581341	0.581341	0.581341	0.581341	0.581341	0.581341	0.581341	0.581341	0.581341	0.581341	0.581341	0.581341	0.581341	0.581341	0.581341	0.581341	0.581341	0.581341	0.581341	0.581341	0.581341	0.581341	0.581341	0.581341	0.581341	0.581341	0.581341	0.581341	0.581341	0.581341	0.581341	0.581341	0.581341	0.581341	0.581341	0.581341	0.581341
41	clusters	0.588853	0.588853	0.588853	0.588853	0.588853	0.588853	0.588853	0.588853	0.588853	0.588853	0.588853	0.588853	0.588853	0.588853	0.588853	0.588853	0.588853	0.588853	0.588853	0.588853	0.588853	0.588853	0.588853	0.588853	0.588853	0.588853	0.588853	0.588853	0.588853	0.588853	0.588853	0.588853	0.588853	0.588853	0.588853	0.588853	0.588853	0.588853	0.588853	0.588853	0.588853	0.588853	0.588853	0.588853	0.588853	0.588853	0.588853	0.588853
42	fret	0.38911	0.44755	0.408379	0.402576	0.385282	0.402576	0.370048	0.369101	0.325124	0.313152	0.277726	0.284927	0.307655	0.401611	0.362481	0.287637	0.211589	0.296712	0.28583	0.332532	0.238615	0.216786	0.211589	0.279526	0.275031	0.310401	0.30857	0.20986	0.316827	0.238615	0.258059	0.204684	0.284032	0.243896	0.411287	0.243015	0.314989	0.266971	0.184137	0.275031	0.178192	0.275929	0.31407	0.354006	0.341836	0.106832	0.0738736	0.0706937
42	states	0.38911	0.38911	0.38911	0.38911	0.38911	0.38911	0.38911	0.38911	0.278626	0.278626	0.278626	0.278626	0.278626	0.38911	0.38911	0.278626	0.278626	0.278626	0.278626	0.278626	0.278626	0.278626	0.278626	0.278626	0.278626	0.278626	0.278626	0.278626	0.278626	0.278626	0.278626	0.278626	0.278626	0.278626	0.38911	0.278626	0.278626	0.278626	0.278626	0.278626	0.278626	0.278626	0.278626	0.38911	0.38911	0.0838822	0.0838822	0.0838822
42	clusters	0.353203	0.353203	0.353203	0.353203	0.353203	0.353203	0.353203	0.353203	0.353203	0.353203	0.353203	0.353203	0.353203	0.353203	0.353203	0.353203	0.353203	0.353203	0.353203	0.353203	0.353203	0.353203	0.353203	0.353203	0.353203	0.353203	0.353203	0.353203	0.353203	0.353203	0.353203	0.353203	0.353203	0.353203	0.353203	0.353203	0.353203	0.353203	0.353203	0.353203	0.353203	0.353203	0.353203	0.353203	0.353203	0.0953053	0.0953053	0.0953053
43	fret	0.790393	0.50307	0.651377	0.414479	0.489878	0.62731	0.432064	0.605685	0.69365	0.8994	0.772752	0.806975	0.836925	0.73225	0.790393	0.582172	0.789213	0.548473	0.850242	0.766935	0.576868	0.50307	0.700408	0.751832	0.609991	0.511257	0.473751	0.596032	0.418372	0.572635	0.436978	0.569466	0.680203	0.691402	0.62731	0.614307	0.513305	0.380758	0.409624	0.493932	0.626223	0.666846	0.445856	0.484824	0.415452	0.453784	0.395135	0.337363
43	states	0.772752	0.582172	0.582172	0.435502	0.435502	0.582172	0.435502	0.582172	0.772752	0.772752	0.772752	0.772752	0.772752	0.772752	0.772752	0.582172	0.772752	0.582172	0.772752	0.772752	0.582172	0.582172	0.772752	0.772752	0.582172	0.435502	0.435502	0.582172	0.435502	0.582172	0.435502	0.582172	0.772752	0.772752	0.582172	0.582172	0.435502	0.435502	0.435502	0.435502	0.582172	0.582172	0.435502	0.435502	0.435502	0.435502	0.435502	0.435502
43	clusters	0.808561	0.588853	0.588853	0.353203	0.353203	0.588853	0.353203	0.588853	0.808561	0.808561	0.808561	0.808561	0.808561	0.808561	0.808561	0.588853	0.808561	0.588853	0.808561	0.808561	0.588853	0.588853	0.808561	0.808561	0.588853	0.353203	0.353203	0.588853	0.353203	0.588853	0.353203	0.588853	0.808561	0.808561	0.588853	0.588853	0.353203	0.353203	0.353203	0.353203	0.588853	0.588853	0.353203	0.353203	0.353203	0.353203	0.353203	0.353203
44	fret	0.727852	0.860986	0.839085	0.681916	0.806359	0.695956	0.84577	0.908147	0.674954	0.824215	0.720514	0.713236	0.950209	0.765483	0.776309	0.71614	0.87472	0.830795	0.79995	0.928039	0.747222	0.774755	0.782554	0.735253	0.684717	0.893931	0.733768	0.803149	0.785692	0.866113	0.723442	0.80958	0.812812	0.906359	0.784122
44	states	0.785692	0.785692	0.785692	0.785692	0.785692	0.785692	0.785692	0.785692	0.785692	0.785692	0.785692	0.785692	0.785692	0.785692	0.785692	0.785692	0.785692	0.785692	0.785692	0.785692	0.785692	0.785692	0.785692	0.785692	0.785692	0.785692	0.785692	0.785692	0.785692	0.785692	0.785692	0.785692	0.785692	0.785692	0.785692
44	clusters	0.808561	0.808561	0.808561	0.808561	0.808561	0.808561	0.808561	0.808561	0.808561	0.808561	0.808561	0.808561	0.808561	0.808561	0.808561	0.808561	0.808561	0.808561	0.808561	0.808561	0.808561	0.808561	0.808561	0.808561	0.808561	0.808561	0.808561	0.808561	0.808561	0.808561	0.808561	0.808561	0.808561	0.808561	0.808561
45	fret	0.524135	0.522105	0.737647	0.675101	0.483805	0.414509	0.669768	0.597117	0.637967	0.538393	0.592959	0.45589	0.743099	0.554761	0.409622	0.691155	0.650636	0.583623	0.751842	0.598158	0.55271	0.507942	0.505923	0.517045	0.25464	0.453907	0.227924	0.311662	0.405717	0.416467	0.504914	0.637967	0.473805	0.576381	0.569157	0.692228	0.579483	0.504914	0.417446	0.596077	0.743099	0.462844	0.421366	0.345862	0.214203	0.163562	0.277874	0.475802
45	states	0.527693	0.527693	0.527693	0.527693	0.527693	0.527693	0.527693	0.527693	0.527693	0.527693	0.527693	0.527693	0.527693	0.527693	0.527693	0.527693	0.527693	0.527693	0.527693	0.527693	0.527693	0.527693	0.527693	0.527693	0.527693	0.527693	0.527693	0.527693	0.527693	0.527693	0.527693	0.527693	0.527693	0.527693	0.527693	0.527693	0.527693	0.527693	0.527693	0.527693	0.527693	0.527693	0.527693	0.527693	0.527693	0.527693	0.527693	0.527693
45	clusters	0.588853	0.588853	0.588853	0.588853	0.588853	0.588853	0.588853	0.588853	0.588853	0.588853	0.588853	0.588853	0.588853	0.588853	0.588853	0.588853	0.588853	0.588853	0.588853	0.588853	0.588853	0.588853	0.588853	0.588853	0.588853	0.588853	0.588853	0.588853	0.588853	0.588853	0.588853	0.588853	0.588853	0.588853	0.588853	0.588853	0.588853	0.588853	0.588853	0.588853	0.588853	0.588853	0.588853	0.588853	0.588853	0.588853	0.588853	0.588853
46	fret	0.860845	0.83043	0.672866	0.667424	0.644692	0.633964	0.507737	0.439711	0.68488	0.534289	0.641464	0.646846	0.676136	0.493566	0.903583	1.38391	0.66308	0.580975	0.657662	0.840916	0.56635	0.491548	0.622204	1.06042	0.636109	0.657662	0.537372	1.13405	0.510774	0.769572	0.50064	0.673955	0.50064	0.895215	1.00747	0.729084	0.90478	0.731315	0.439711	0.59253	0.700259	0.693656	0.653335	0.752619	1.00747	0.864378	0.992547	1.68753
46	states	0.714671	0.714671	0.714671	0.714671	0.714671	0.714671	0.714671	0.714671	0.714671	0.714671	0.714671	0.714671	0.714671	0.714671	0.714671	0.714671	0.714671	0.714671	0.714671	0.714671	0.714671	0.714671	0.714671	0.714671	0.714671	0.714671	0.714671	0.714671	0.714671	0.714671	0.714671	0.714671	0.714671	0.714671	0.714671	0.714671	0.714671	0.714671	0.714671	0.714671	0.714671	0.714671	0.714671	0.714671	0.714671	0.714671	0.714671	0.714671
46	clusters	0.808561	0.808561	0.808561	0.808561	0.808561	0.808561	0.808561	0.808561	0.808561	0.808561	0.808561	0.808561	0.808561	0.808561	0.808561	0.808561	0.808561	0.808561	0.808561	0.808561	0.808561	0.808561	0.808561	0.808561	0.808561	0.808561	0.808561	0.808561	0.808561	0.808561	0.808561	0.808561	0.808561	0.808561	0.808561	0.808561	0.808561	0.808561	0.808561	0.808561	0.808561	0.808561	0.808561	0.808561	0.808561	0.808561	0.808561	0.808561
47	fret	0.926462	0.884755	0.579302	2.13884	0.738124	1.33319	0.91939	0.823709	1.01719	0.773855	0.776895	0.879662	1.23507	0.595308	1.07906	1.08317	1.23507	0.992407	1.40963	0.778419	1.02497	0.91939	0.818923	0.857889	1.05072	1.19572	1.01535	0.727957	1.05272	0.843093	0.830127	0.556443	1.08523	0.864537	0.457136	0.183655	0.772339	0.703671	0.772339	0.915872	0.749882	0.889874	0.707955	1.30526	1.22336	1.20257	1.26126	0.810999
47	states	0.923808	0.923808	0.923808	0.923808	0.923808	0.923808	0.923808	0.923808	0.923808	0.923808	0.923808	0.923808	0.923808	0.341142	0.923808	0.923808	0.923808	0.923808	0.923808	0.923808	0.923808	0.923808	0.923808	0.923808	0.923808	0.923808	0.923808	0.923808	0.923808	0.923808	0.923808	0.341142	0.923808	0.923808	0.341142	0.341142	0.923808	0.923808	0.923808	0.923808	0.923808	0.923808	0.923808	0.923808	0.923808	0.923808	0.923808	0.923808
47	clusters	0.808561	0.808561	0.808561	0.808561	0.808561	0.808561	0.808561	0.808561	0.808561	0.808561	0.808561	0.808561	0.808561	0.353203	0.808561	0.808561	0.808561	0.808561	0.808561	0.808561	0.808561	0.808561	0.808561	0.808561	0.808561	0.808561	0.808561	0.808561	0.808561	0.808561	0.808561	0.353203	0.808561	0.808561	0.353203	0.353203	0.808561	0.808561	0.808561	0.808561	0.808561	0.808561	0.808561	0.808561	0.808561	0.808561	0.808561	0.808561
48	fret	0.92484	0.0567523	0.138977	0.203317	0.499238	0.138121	0.96645	0.757227	0.706824	0.0314209	0.0460907	0.306462	0.971392	1.14152	0.752703	0.823811	1.08266	0.870831	0.862536	0.823811	0.861353	1.00752	0.96275	0.798336	0.683668	1.31383	0.823811	1	1.08137	0.907909	1.02515	0.841336	0.905499	0.778816	0.986277	0.792584	0.833142	0.815676	0.909114	0.985033	0.749316	0.496203	1.00624	0.844856	0.643405	0.854269	0.993753	0.847206
48	states	0.854269	0.138549	0.138549	0.138549	0.138549	0.138549	0.854269	0.854269	0.854269	0.138549	0.138549	0.138549	0.854269	0.854269	0.854269	0.854269	0.854269	0.854269	0.854269	0.854269	0.854269	0.854269	0.854269	0.854269	0.854269	0.854269	0.854269	0.854269	0.854269	0.854269	0.854269	0.854269	0.854269	0.854269	0.854269	0.854269	0.854269	0.854269	0.854269	0.854269	0.854269	0.854269	0.854269	0.854269	0.854269	0.854269	0.854269	0.854269
48	clusters	0.808561	0.0953053	0.0953053	0.0953053	0.0953053	0.0953053	0.808561	0.808561	0.808561	0.0953053	0.0953053	0.0953053	0.808561	0.808561	0.808561	0.808561	0.808561	0.808561	0.808561	0.808561	0.808561	0.808561	0.808561	0.808561	0.808561	0.808561	0.808561	0.808561	0.808561	0.808561	0.808561	0.808561	0.808561	0.808561	0.808561	0.808561	0.808561	0.808561	0.808561	0.808561	0.808561	0.808561	0.808561	0.808561	0.808561	0.808561	0.808561	0.808561
49	fret	0.0981641	0.0425917	0.000461291	0.117453	0.157177	0.0183667	0.0644512	-0.0176105	0.0596779	0.0752389	0.0116835	0.0617932	0.0586239	0.0617932	0.0671246	0.564964	0.681905	0.515832	0.458002	0.58429	0.606839	0.557378	0.69391	0.552365	0.120444	0.367904	0.515832	0.490297	0.536318	0.668555	0.480106	0.687884	0.765095	0.610892	0.513466	0.634289	0.698461	0.549873	0.556121	0.696941	0.628717	0.70457	0.701509	0.580383	0.882186	0.580383	0.668555	0.706105
49	states	0.0596779	0.0596779	0.0596779	0.0596779	0.0596779	0.0596779	0.0596779	0.0596779	0.0596779	0.0596779	0.0596779	0.0596779	0.0596779	0.0596779	0.0596779	0.639903	0.639903	0.639903	0.639903	0.639903	0.639903	0.639903	0.639903	0.639903	0.0596779	0.639903	0.639903	0.639903	0.639903	0.639903	0.639903	0.639903	0.639903	0.639903	0.639903	0.639903	0.639903	0.639903	0.639903	0.639903	0.639903	0.639903	0.639903	0.639903	0.639903	0.639903	0.639903	0.639903
49	clusters	0.0953053	0.0953053	0.0953053	0.0953053	0.0953053	0.0953053	0.0953053	0.0953053	0.0953053	0.0953053	0.0953053	0.0953053	0.0953053	0.0953053	0.0953053	0.588853	0.588853	0.588853	0.588853	0.588853	0.588853	0.588853	0.588853	0.588853	0.0953053	0.588853	0.588853	0.588853	0.588853	0.588853	0.588853	0.588853	0.588853	0.588853	0.588853	0.588853	0.588853	0.588853	0.588853	0.588853	0.588853	0.588853	0.588853	0.588853	0.588853	0.588853	0.588853	0.588853
50	fret	0.640478	0.893033	0.748304	0.667773	0.746027	1.0882	0.426195	0.118397	0.093448	0.0380984	0.121748	0.183975	-0.0172009	0.105881	0.0942743	0.623216	0.752866	0.797843	0.816562	1.19495	0.732412	0.938446	0.847317	0.830704	0.787383	0.54611	0.707668	0.933493	0.682095	0.512145	0.172744	0.71551	0.864053	0.596494	0.746027	0.834254	0.797843	0.811867	0.774644	0.801341	0.220713	0.0753605	0.0421126	0.174468	0.0118212	0.0975832	0.113381	0.0364951
50	states	0.829522	0.829522	0.829522	0.829522	0.829522	0.829522	0.101313	0.101313	0.101313	0.101313	0.101313	0.101313	0.101313	0.101313	0.101313	0.829522	0.829522	0.829522	0.829522	0.829522	0.829522	0.829522	0.829522	0.829522	0.829522	0.829522	0.829522	0.829522	0.829522	0.829522	0.101313	0.829522	0.829522	0.829522	0.829522	0.829522	0.829522	0.829522	0.829522	0.829522	0.101313	0.101313	0.101313	0.101313	0.101313	0.101313	0.101313	0.101313
50	clusters	0.808561	0.808561	0.808561	0.808561	0.808561	0.808561	0.0953053	0.0953053	0.0953053	0.0953053	0.0953053	0.0953053	0.0953053	0.0953053	0.0953053	0.808561	0.808561	0.808561	0.808561	0.808561	0.808561	0.808561	0.808561	0.808561	0.808561	0.808561	0.808561	0.808561	0.808561	0.808561	0.0953053	0.808561	0.808561	0.808561	0.808561	0.808561	0.808561	0.808561	0.808561	0.808561	0.0953053	0.0953053	0.0953053	0.0953053	0.0953053	0.0953053	0.0953053	0.0953053
51	fret	0.783375	0.915288	0.798022	0.767718	0.632511	0.821102	0.688944	0.843208	0.975228	0.694098	0.781285	0.71372	0.671445	0.786511	0.671445	0.824256	0.907832	0.766675	0.762507	0.824256	0.637622	0.66426	0.884454	0.8148	0.81795	0.776064	0.882333	1.07159	0.908897	0.68173	0.870677	0.748977	0.785466	0.873854	0.791741	0.716823	0.671445	0.671445	0.835831	0.805351	0.767718	0.793834	0.917419	0.745859	0.730288	0.869619	0.778152	0.770846
51	states	0.824256	0.824256	0.824256	0.824256	0.824256	0.824256	0.824256	0.824256	0.824256	0.824256	0.824256	0.824256	0.824256	0.824256	0.824256	0.824256	0.824256	0.824256	0.824256	0.824256	0.824256	0.824256	0.824256	0.824256	0.824256	0.824256	0.824256	0.824256	0.824256	0.824256	0.824256	0.824256	0.824256	0.824256	0.824256	0.824256	0.824256	0.824256	0.824256	0.824256	0.824256	0.824256	0.824256	0.824256	0.824256	0.824256	0.824256	0.824256
51	clusters	0.808561	0.808561	0.808561	0.808561	0.808561	0.808561	0.808561	0.808561	0.808561	0.808561	0.808561	0.808561	0.808561	0.808561	0.808561	0.808561	0.808561	0.808561	0.808561	0.808561	0.808561	0.808561	0.808561	0.808561	0.808561	0.808561	0.808561	0.808561	0.808561	0.808561	0.808561	0.808561	0.808561	0.808561	0.808561	0.808561	0.808561	0.808561	0.808561	0.808561	0.808561	0.808561	0.808561	0.808561	0.808561	0.808561	0.808561	0.808561
[truncated: 452 more columns]

## Sheet: 309-309_inter_liposome
1	fret	0.887729	0.6956	0.933328	0.811321	0.813978	0.831379	1.36087	0.842197	1.09225	0.95081	0.786327	1.00608	0.890536	0.745208	0.673854	0.359757	0.262094	0.684682	0.906078	0.974452	1.06984	0.787631	0.823321	0.602733	0.790243	0.791551	0.846275	0.667878	0.733911	0.832727	0.71895	1.03373	0.828688	0.904658	0.756672	0.656006	0.745208	0.737678	1.00608	0.778528	0.705381	0.741421	0.849001	0.842197	1.52331	0.961106	0.468507	0.83813
1	states	0.842197	0.842197	0.842197	0.842197	0.842197	0.842197	0.842197	0.842197	0.842197	0.842197	0.842197	0.842197	0.842197	0.842197	0.842197	0.359757	0.359757	0.842197	0.842197	0.842197	0.842197	0.842197	0.842197	0.842197	0.842197	0.842197	0.842197	0.842197	0.842197	0.842197	0.842197	0.842197	0.842197	0.842197	0.842197	0.842197	0.842197	0.842197	0.842197	0.842197	0.842197	0.842197	0.842197	0.842197	0.842197	0.842197	0.359757	0.842197
1	clusters	0.8725	0.8725	0.8725	0.8725	0.8725	0.8725	0.8725	0.8725	0.8725	0.8725	0.8725	0.8725	0.8725	0.8725	0.8725	0.350764	0.350764	0.8725	0.8725	0.8725	0.8725	0.8725	0.8725	0.8725	0.8725	0.8725	0.8725	0.8725	0.8725	0.8725	0.8725	0.8725	0.8725	0.8725	0.8725	0.8725	0.8725	0.8725	0.8725	0.8725	0.8725	0.8725	0.8725	0.8725	0.8725	0.8725	0.350764	0.8725
2	fret	1.0765	0.302963	0.0730873	0.0902621	0.0759474	0.124714	0.0788085	0.161229	0.951462	0.896902	1.12141	0.876005	0.986256	0.976754	0.959884	0.348099	0.121838	0.823971	0.93674	0.943046	0.93674	0.975698	0.998942	0.882269	0.953566	1.00105	1.01376	1.08183	0.930438	0.845789	0.958831	0.924141	1.10428	0.984144	1.03498	0.952514	0.989426	0.928339	0.938842	0.931488	0.954619	0.879136	0.949357	0.860363	0.996827	0.911559	0.986256	0.449015
2	states	0.932538	0.11513	0.11513	0.11513	0.11513	0.11513	0.11513	0.11513	0.932538	0.932538	0.932538	0.932538	0.932538	0.932538	0.932538	0.11513	0.11513	0.932538	0.932538	0.932538	0.932538	0.932538	0.932538	0.932538	0.932538	0.932538	0.932538	0.932538	0.932538	0.932538	0.932538	0.932538	0.932538	0.932538	0.932538	0.932538	0.932538	0.932538	0.932538	0.932538	0.932538	0.932538	0.932538	0.932538	0.932538	0.932538	0.932538	0.11513
2	clusters	0.8725	0.11666	0.11666	0.11666	0.11666	0.11666	0.11666	0.11666	0.8725	0.8725	0.8725	0.8725	0.8725	0.8725	0.8725	0.11666	0.11666	0.8725	0.8725	0.8725	0.8725	0.8725	0.8725	0.8725	0.8725	0.8725	0.8725	0.8725	0.8725	0.8725	0.8725	0.8725	0.8725	0.8725	0.8725	0.8725	0.8725	0.8725	0.8725	0.8725	0.8725	0.8725	0.8725	0.8725	0.8725	0.8725	0.8725	0.11666
3	fret	0.758442	0.625743	0.810738	0.914286	0.853272	0.886183	0.995511	0.830804	0.775492	1.03426	0.902128	0.778947	0.81435	0.930769	0.780681	0.874419	0.827119	1.11489	0.926619	0.910214	1.15122	0.969042	0.922488	0.701564	0.819798	0.834506	0.949696	0.717387	1.0136	0.945455	0.796452	0.832653	0.953959	0.828959	0.975586	0.866667	1.13029	0.836364	0.945455	0.77377	0.796452	0.847597	0.9866	0.755076	0.761822	0.896113	0.787652	0.722199
3	states	0.877349	0.877349	0.877349	0.877349	0.877349	0.877349	0.877349	0.877349	0.877349	0.877349	0.877349	0.877349	0.877349	0.877349	0.877349	0.877349	0.877349	0.877349	0.877349	0.877349	0.877349	0.877349	0.877349	0.877349	0.877349	0.877349	0.877349	0.877349	0.877349	0.877349	0.877349	0.877349	0.877349	0.877349	0.877349	0.877349	0.877349	0.877349	0.877349	0.877349	0.877349	0.877349	0.877349	0.877349	0.877349	0.877349	0.877349	0.877349
3	clusters	0.8725	0.8725	0.8725	0.8725	0.8725	0.8725	0.8725	0.8725	0.8725	0.8725	0.8725	0.8725	0.8725	0.8725	0.8725	0.8725	0.8725	0.8725	0.8725	0.8725	0.8725	0.8725	0.8725	0.8725	0.8725	0.8725	0.8725	0.8725	0.8725	0.8725	0.8725	0.8725	0.8725	0.8725	0.8725	0.8725	0.8725	0.8725	0.8725	0.8725	0.8725	0.8725	0.8725	0.8725	0.8725	0.8725	0.8725	0.8725
4	fret	0.929482	0.925261	0.723094	0.741285	0.944424	0.791435	0.918968	1.23674	0.759924	0.845022	0.835522	0.804042	0.986336	0.737944	1.00217	0.837413	0.829876	0.92106	1.08666	0.914798	0.964025	0.90652	0.986336	0.929482	0.972881	1.08919	0.894255	1.19064	0.997708	1.03976	0.957442	0.908582	1.11746	0.964025	0.918968	1.14392	0.933725	0.988599	0.837413	1.01855	0.845022	0.972881	0.966231	0.914798	0.85657	1.00923	0.984079	0.870254
4	states	0.930542	0.930542	0.930542	0.930542	0.930542	0.930542	0.930542	0.930542	0.930542	0.930542	0.930542	0.930542	0.930542	0.930542	0.930542	0.930542	0.930542	0.930542	0.930542	0.930542	0.930542	0.930542	0.930542	0.930542	0.930542	0.930542	0.930542	0.930542	0.930542	0.930542	0.930542	0.930542	0.930542	0.930542	0.930542	0.930542	0.930542	0.930542	0.930542	0.930542	0.930542	0.930542	0.930542	0.930542	0.930542	0.930542	0.930542	0.930542
4	clusters	0.8725	0.8725	0.8725	0.8725	0.8725	0.8725	0.8725	0.8725	0.8725	0.8725	0.8725	0.8725	0.8725	0.8725	0.8725	0.8725	0.8725	0.8725	0.8725	0.8725	0.8725	0.8725	0.8725	0.8725	0.8725	0.8725	0.8725	0.8725	0.8725	0.8725	0.8725	0.8725	0.8725	0.8725	0.8725	0.8725	0.8725	0.8725	0.8725	0.8725	0.8725	0.8725	0.8725	0.8725	0.8725	0.8725	0.8725	0.8725
5	fret	0.851807	0.808891	0.752978	0.906677	1.06799	0.817169	0.985877	0.894364	0.757581	0.882119	0.906677	0.9693	0.633429	0.901743	0.747237	0.843395	0.8494	1.03636	1.23879	0.890683	0.932762	1.10547	0.837406	0.801821	0.878459	1.07198	1.01033	1.13535	0.952846	0.992285	0.925278	0.926523	0.283877	0.194303	0.0777916	0.634515	0.971842	0.96803	1.01678	0.716507	0.798295	0.983318	0.827859	1.01033	0.733524	0.661865	0.81954	0.422356
5	states	0.844595	0.844595	0.844595	0.844595	0.844595	0.844595	0.844595	0.844595	0.844595	0.844595	0.844595	0.844595	0.844595	0.844595	0.844595	0.844595	0.844595	0.844595	0.844595	0.844595	0.844595	0.844595	0.844595	0.844595	0.844595	0.844595	0.844595	0.844595	0.844595	0.844595	0.844595	0.844595	0.121365	0.121365	0.121365	0.470815	0.844595	0.844595	0.844595	0.844595	0.844595	0.844595	0.844595	0.844595	0.844595	0.844595	0.844595	0.470815
5	clusters	0.8725	0.8725	0.8725	0.8725	0.8725	0.8725	0.8725	0.8725	0.8725	0.8725	0.8725	0.8725	0.8725	0.8725	0.8725	0.8725	0.8725	0.8725	0.8725	0.8725	0.8725	0.8725	0.8725	0.8725	0.8725	0.8725	0.8725	0.8725	0.8725	0.8725	0.8725	0.8725	0.11666	0.11666	0.11666	0.561256	0.8725	0.8725	0.8725	0.8725	0.8725	0.8725	0.8725	0.8725	0.8725	0.8725	0.8725	0.561256
6	fret	0.468624	0.85318	0.778911	0.854127	0.79613	0.78657	0.791352	0.818061	0.682373	0.690152	0.715365	0.716332	0.704716	0.759723	0.670687	0.735655	0.893743	0.906892	0.980565	0.945238	0.79804	0.74433	0.783699	0.79804	0.890922	0.729864	0.956416	0.389626	0.436333	0.506757	0.497747	0.495742	0.461574	0.719235	0.471643	0.4827	0.534709	0.542673	0.513757	0.432285	0.423168	0.618812	0.4827	0.614879	0.491732	0.536701	0.481696	0.471643
6	states	0.507258	0.769317	0.769317	0.769317	0.769317	0.769317	0.769317	0.769317	0.769317	0.769317	0.769317	0.769317	0.769317	0.769317	0.769317	0.769317	0.769317	0.769317	0.769317	0.769317	0.769317	0.769317	0.769317	0.769317	0.769317	0.769317	0.769317	0.507258	0.507258	0.507258	0.507258	0.507258	0.507258	0.507258	0.507258	0.507258	0.507258	0.507258	0.507258	0.507258	0.507258	0.507258	0.507258	0.507258	0.507258	0.507258	0.507258	0.507258
6	clusters	0.561256	0.8725	0.8725	0.8725	0.8725	0.8725	0.8725	0.8725	0.8725	0.8725	0.8725	0.8725	0.8725	0.8725	0.8725	0.8725	0.8725	0.8725	0.8725	0.8725	0.8725	0.8725	0.8725	0.8725	0.8725	0.8725	0.8725	0.561256	0.561256	0.561256	0.561256	0.561256	0.561256	0.561256	0.561256	0.561256	0.561256	0.561256	0.561256	0.561256	0.561256	0.561256	0.561256	0.561256	0.561256	0.561256	0.561256	0.561256
7	fret	0.809339	0.947541	0.769824	0.834981	1.02948	0.888602	0.866767	0.957407	0.807656	0.777908	0.685642	1.06651	0.971394	0.973409	0.841947	0.774665	0.909087	0.82635	0.746026	0.738241	0.774665	1.03151	0.955425	0.732064	0.864971	0.704827	0.899719	0.941671	0.897857	0.98559	0.781163	0.786068	1.19651	0.766612	0.64738	0.943623	0.963376	0.971394	0.920457	1.02298	0.773048	0.854271	1.00613	0.912862	0.883093	0.953448	0.804299	1.14014
7	states	0.877619	0.877619	0.877619	0.877619	0.877619	0.877619	0.877619	0.877619	0.877619	0.877619	0.877619	0.877619	0.877619	0.877619	0.877619	0.877619	0.877619	0.877619	0.877619	0.877619	0.877619	0.877619	0.877619	0.877619	0.877619	0.877619	0.877619	0.877619	0.877619	0.877619	0.877619	0.877619	0.877619	0.877619	0.877619	0.877619	0.877619	0.877619	0.877619	0.877619	0.877619	0.877619	0.877619	0.877619	0.877619	0.877619	0.877619	0.877619
7	clusters	0.8725	0.8725	0.8725	0.8725	0.8725	0.8725	0.8725	0.8725	0.8725	0.8725	0.8725	0.8725	0.8725	0.8725	0.8725	0.8725	0.8725	0.8725	0.8725	0.8725	0.8725	0.8725	0.8725	0.8725	0.8725	0.8725	0.8725	0.8725	0.8725	0.8725	0.8725	0.8725	0.8725	0.8725	0.8725	0.8725	0.8725	0.8725	0.8725	0.8725	0.8725	0.8725	0.8725	0.8725	0.8725	0.8725	0.8725	0.8725
8	fret	0.270166	0.228296	0.316875	0.347035	0.26298	0.372036	0.381544	0.379632	0.470464	0.253532	0.300629	0.291413	0.336227	0.456424	0.263774	0.338912	0.254313	0.27258	0.39901	0.28562	0.401966	0.291413	0.346128	0.250399	0.31948	0.280697	0.251971	0.344316	0.383462	0.329121	0.229045	0.335334	0.177461	0.314282	0.384396	0.284796	0.238109	0.292245	0.324721	0.243461	0.300629	0.333553	0.238871	0.327357	0.316875	0.248863	0.325598	0.203375
8	states	0.300629	0.300629	0.300629	0.300629	0.300629	0.300629	0.300629	0.300629	0.300629	0.300629	0.300629	0.300629	0.300629	0.300629	0.300629	0.300629	0.300629	0.300629	0.300629	0.300629	0.300629	0.300629	0.300629	0.300629	0.300629	0.300629	0.300629	0.300629	0.300629	0.300629	0.300629	0.300629	0.300629	0.300629	0.300629	0.300629	0.300629	0.300629	0.300629	0.300629	0.300629	0.300629	0.300629	0.300629	0.300629	0.300629	0.300629	0.300629
8	clusters	0.350764	0.350764	0.350764	0.350764	0.350764	0.350764	0.350764	0.350764	0.350764	0.350764	0.350764	0.350764	0.350764	0.350764	0.350764	0.350764	0.350764	0.350764	0.350764	0.350764	0.350764	0.350764	0.350764	0.350764	0.350764	0.350764	0.350764	0.350764	0.350764	0.350764	0.350764	0.350764	0.350764	0.350764	0.350764	0.350764	0.350764	0.350764	0.350764	0.350764	0.350764	0.350764	0.350764	0.350764	0.350764	0.350764	0.350764	0.350764
9	fret	0.780528	0.799858	0.794539	0.798081	0.888071	1.04147	1.35591	0.914216	1.41933	0.928633	1.08737	0.866564	0.900038	1.0112	0.744896
9	states	0.900038	0.900038	0.900038	0.900038	0.900038	0.900038	0.900038	0.900038	0.900038	0.900038	0.900038	0.900038	0.900038	0.900038	0.900038
9	clusters	0.8725	0.8725	0.8725	0.8725	0.8725	0.8725	0.8725	0.8725	0.8725	0.8725	0.8725	0.8725	0.8725	0.8725	0.8725
10	fret	0.836546	0.692512	0.732177	0.654847	0.85724	0.800213	0.892255	1.08963	1.25671	0.872622	1.02275	1.05083	1.24215	0.644639	1.27745
10	states	0.872622	0.872622	0.872622	0.872622	0.872622	0.872622	0.872622	0.872622	0.872622	0.872622	0.872622	0.872622	0.872622	0.872622	0.872622
10	clusters	0.8725	0.8725	0.8725	0.8725	0.8725	0.8725	0.8725	0.8725	0.8725	0.8725	0.8725	0.8725	0.8725	0.8725	0.8725
11	fret	0.61777	0.68416	0.630968	0.769742	0.659097	0.611824	0.614199	0.700762	0.67281
11	states	0.659097	0.659097	0.659097	0.659097	0.659097	0.659097	0.659097	0.659097	0.659097
11	clusters	0.561256	0.561256	0.561256	0.561256	0.561256	0.561256	0.561256	0.561256	0.561256
12	fret	0.951275	0.844434	0.984664	0.847438	0.97287	0.920411	0.969522	0.943074	0.91881	0.971195	0.94963	0.893476	0.951275	0.823632	0.926842	0.91721	0.865629	0.867158	0.814835	0.943074	0.926842	0.943074	0.966184	0.850449	1.0401	0.906073	0.952922	0.912424	0.979595	0.991456	0.912424	0.910833	0.928455	0.887229	0.820692	1.01546	0.867158	0.828057	0.896612	0.893476	0.867158	0.909244	0.946348	0.97287	0.976228	0.966184	0.967852	0.907657
12	states	0.915612	0.915612	0.915612	0.915612	0.915612	0.915612	0.915612	0.915612	0.915612	0.915612	0.915612	0.915612	0.915612	0.915612	0.915612	0.915612	0.915612	0.915612	0.915612	0.915612	0.915612	0.915612	0.915612	0.915612	0.915612	0.915612	0.915612	0.915612	0.915612	0.915612	0.915612	0.915612	0.915612	0.915612	0.915612	0.915612	0.915612	0.915612	0.915612	0.915612	0.915612	0.915612	0.915612	0.915612	0.915612	0.915612	0.915612	0.915612
12	clusters	0.8725	0.8725	0.8725	0.8725	0.8725	0.8725	0.8725	0.8725	0.8725	0.8725	0.8725	0.8725	0.8725	0.8725	0.8725	0.8725	0.8725	0.8725	0.8725	0.8725	0.8725	0.8725	0.8725	0.8725	0.8725	0.8725	0.8725	0.8725	0.8725	0.8725	0.8725	0.8725	0.8725	0.8725	0.8725	0.8725	0.8725	0.8725	0.8725	0.8725	0.8725	0.8725	0.8725	0.8725	0.8725	0.8725	0.8725	0.8725
13	fret	0.763199	0.751552	0.846607	0.698964	0.827231	0.78232	0.874732	0.804723	0.76426	0.944663	0.707339	0.732554	0.932572	0.894299	0.569979	0.835833	0.785514	0.804723	0.984443	0.810072	0.750495	0.807932	0.860649	0.634549	0.895388	0.825083	0.924893	0.840139	0.76532	1.09212	0.983333	0.867144	0.871478	0.925989	0.594473	0.936965	0.856324	0.730447	0.663532	0.771688	0.698964	0.921606	0.479247	0.592427	0.726238	0.769564	0.82938	0.670798
13	states	0.8165	0.8165	0.8165	0.8165	0.8165	0.8165	0.8165	0.8165	0.8165	0.8165	0.8165	0.8165	0.8165	0.8165	0.544594	0.8165	0.8165	0.8165	0.8165	0.8165	0.8165	0.8165	0.8165	0.8165	0.8165	0.8165	0.8165	0.8165	0.8165	0.8165	0.8165	0.8165	0.8165	0.8165	0.544594	0.8165	0.8165	0.8165	0.8165	0.8165	0.8165	0.8165	0.544594	0.544594	0.8165	0.8165	0.8165	0.8165
13	clusters	0.8725	0.8725	0.8725	0.8725	0.8725	0.8725	0.8725	0.8725	0.8725	0.8725	0.8725	0.8725	0.8725	0.8725	0.561256	0.8725	0.8725	0.8725	0.8725	0.8725	0.8725	0.8725	0.8725	0.8725	0.8725	0.8725	0.8725	0.8725	0.8725	0.8725	0.8725	0.8725	0.8725	0.8725	0.561256	0.8725	0.8725	0.8725	0.8725	0.8725	0.8725	0.8725	0.561256	0.561256	0.8725	0.8725	0.8725	0.8725
14	fret	0.92436	0.894479	0.933996
14	states	0.92436	0.92436	0.92436
14	clusters	0.8725	0.8725	0.8725
15	fret	0.585984	0.854668	0.742115	0.817977	0.734954	0.619987	0.772291	0.800544	0.954713	0.75412	0.684526	0.819229	0.812977	0.875255	0.9615	0.836856	0.960141	0.806749	0.716008	0.852112	0.786972	0.768641	0.885641	0.845739	0.830539	0.793127	0.733763	0.0483779	0.362066	0.820482	0.726638	0.77717	0.86493	0.81173	0.697279	0.72901	0.791895	0.141982	0.524241	0.716008	0.652509	0.761337	0.820482	0.879142	0.871376	0.838122	0.782064	0.831801
15	states	0.362066	0.86493	0.86493	0.86493	0.86493	0.86493	0.86493	0.86493	0.86493	0.86493	0.86493	0.86493	0.86493	0.86493	0.86493	0.86493	0.86493	0.86493	0.86493	0.86493	0.86493	0.86493	0.86493	0.86493	0.86493	0.86493	0.86493	0.362066	0.362066	0.86493	0.86493	0.86493	0.86493	0.86493	0.86493	0.86493	0.86493	0.362066	0.362066	0.86493	0.86493	0.86493	0.86493	0.86493	0.86493	0.86493	0.86493	0.86493
15	clusters	0.350764	0.8725	0.8725	0.8725	0.8725	0.8725	0.8725	0.8725	0.8725	0.8725	0.8725	0.8725	0.8725	0.8725	0.8725	0.8725	0.8725	0.8725	0.8725	0.8725	0.8725	0.8725	0.8725	0.8725	0.8725	0.8725	0.8725	0.350764	0.350764	0.8725	0.8725	0.8725	0.8725	0.8725	0.8725	0.8725	0.8725	0.350764	0.350764	0.8725	0.8725	0.8725	0.8725	0.8725	0.8725	0.8725	0.8725	0.8725
16	fret	0.852512	0.846251	0.902102	1.05092	0.843752	0.943809	0.985121	0.833792	0.857537	0.898239	0.920233	0.955709	0.877775	0.76435	0.825122	0.832551	0.935917	0.920233	0.916333	0.851258	0.908557	0.662273	0.0991262	0.0185316	0.0267636	0.134286	0.104664	0.0509877	0.0162948	0.0647957	0.139151	0.0456531	0.0686574	0.0563423	0.103871	0.0548103	0.0081237	0.0975479	0.269697	0.831311	0.862576	0.921535	0.879048	1.04674	0.977054	0.966351	0.815263	0.843752
16	states	0.939201	0.939201	0.939201	0.939201	0.939201	0.939201	0.939201	0.939201	0.939201	0.939201	0.939201	0.939201	0.939201	0.939201	0.939201	0.939201	0.939201	0.939201	0.939201	0.939201	0.939201	0.939201	0.0686574	0.0686574	0.0686574	0.0686574	0.0686574	0.0686574	0.0686574	0.0686574	0.0686574	0.0686574	0.0686574	0.0686574	0.0686574	0.0686574	0.0686574	0.0686574	0.0686574	0.939201	0.939201	0.939201	0.939201	0.939201	0.939201	0.939201	0.939201	0.939201
16	clusters	0.8725	0.8725	0.8725	0.8725	0.8725	0.8725	0.8725	0.8725	0.8725	0.8725	0.8725	0.8725	0.8725	0.8725	0.8725	0.8725	0.8725	0.8725	0.8725	0.8725	0.8725	0.8725	0.11666	0.11666	0.11666	0.11666	0.11666	0.11666	0.11666	0.11666	0.11666	0.11666	0.11666	0.11666	0.11666	0.11666	0.11666	0.11666	0.11666	0.8725	0.8725	0.8725	0.8725	0.8725	0.8725	0.8725	0.8725	0.8725
17	fret	0.84967	0.964785	0.909319	0.85353	0.536775	0.0922045	0.0932474	0.0849012	-0.0612396	0.160802	0.722403	0.859316	0.867026	0.729246	0.901643	0.88435	0.952381	0.990495	0.951426	0.812926	0.183563	0.0995025	0.124483	0.050399	0.0210305	0.0608668	0.0462088	0.056681	0.10367	0.242292	0.778958	0.911237	0.472765	0.0409685	0.0660966	0.492813	0.965738	0.858352	0.819705	0.96097	0.953336	0.939005	0.964785	0.842912	0.837115	0.842912	0.73999	0.940917
17	states	0.858834	0.858834	0.858834	0.858834	0.858834	0.0770703	0.0770703	0.0770703	0.0770703	0.0770703	0.858834	0.858834	0.858834	0.858834	0.858834	0.858834	0.858834	0.858834	0.858834	0.858834	0.0770703	0.0770703	0.0770703	0.0770703	0.0770703	0.0770703	0.0770703	0.0770703	0.0770703	0.0770703	0.858834	0.858834	0.858834	0.0770703	0.0770703	0.858834	0.858834	0.858834	0.858834	0.858834	0.858834	0.858834	0.858834	0.858834	0.858834	0.858834	0.858834	0.858834
17	clusters	0.8725	0.8725	0.8725	0.8725	0.8725	0.11666	0.11666	0.11666	0.11666	0.11666	0.8725	0.8725	0.8725	0.8725	0.8725	0.8725	0.8725	0.8725	0.8725	0.8725	0.11666	0.11666	0.11666	0.11666	0.11666	0.11666	0.11666	0.11666	0.11666	0.11666	0.8725	0.8725	0.8725	0.11666	0.11666	0.8725	0.8725	0.8725	0.8725	0.8725	0.8725	0.8725	0.8725	0.8725	0.8725	0.8725	0.8725	0.8725
18	fret	0.808038	0.946093	0.877897	0.907584	0.895667	0.805742	0.91476	0.853226	0.895667	0.796581	0.864944	0.398881	0.182913	0.877897	0.842726	0.800012	0.894479	0.896857	0.90639	0.91476	0.901619	0.827635	0.834589	0.850889	0.917157	0.915958	0.864944	0.545782	0.887359	0.841562	0.907584	0.958246	0.941247	0.86025	0.892103	0.892103	0.963123	0.887359	0.957028	0.846221	0.816089	0.90639	0.911169	0.895667	1.04747	0.904003	0.935203	0.683738
18	states	0.89151	0.89151	0.89151	0.89151	0.89151	0.89151	0.89151	0.89151	0.89151	0.89151	0.89151	0.479685	0.479685	0.89151	0.89151	0.89151	0.89151	0.89151	0.89151	0.89151	0.89151	0.89151	0.89151	0.89151	0.89151	0.89151	0.89151	0.479685	0.89151	0.89151	0.89151	0.89151	0.89151	0.89151	0.89151	0.89151	0.89151	0.89151	0.89151	0.89151	0.89151	0.89151	0.89151	0.89151	0.89151	0.89151	0.89151	0.479685
18	clusters	0.8725	0.8725	0.8725	0.8725	0.8725	0.8725	0.8725	0.8725	0.8725	0.8725	0.8725	0.561256	0.561256	0.8725	0.8725	0.8725	0.8725	0.8725	0.8725	0.8725	0.8725	0.8725	0.8725	0.8725	0.8725	0.8725	0.8725	0.561256	0.8725	0.8725	0.8725	0.8725	0.8725	0.8725	0.8725	0.8725	0.8725	0.8725	0.8725	0.8725	0.8725	0.8725	0.8725	0.8725	0.8725	0.8725	0.8725	0.561256
19	fret	0.992521	0.879085	0.936124	0.971191	0.851772	0.887509	0.889616	0.917064	0.940366	0.873825	0.904384	0.944611	0.847578	0.918122	0.885402	0.866467	0.922354	0.950982	0.889616	0.941427	0.908608	0.912835	0.975452	0.980782	0.938245	1.0032	0.922354	0.868569	0.940366	0.914949	0.926589	0.910721	0.929766	0.963739	0.893833	1.01284	0.879085	0.948857	0.944611	0.912835	0.912835	0.973321	0.891724	0.861215	0.921296	0.986115	0.969061	0.942488
19	states	0.92553	0.92553	0.92553	0.92553	0.92553	0.92553	0.92553	0.92553	0.92553	0.92553	0.92553	0.92553	0.92553	0.92553	0.92553	0.92553	0.92553	0.92553	0.92553	0.92553	0.92553	0.92553	0.92553	0.92553	0.92553	0.92553	0.92553	0.92553	0.92553	0.92553	0.92553	0.92553	0.92553	0.92553	0.92553	0.92553	0.92553	0.92553	0.92553	0.92553	0.92553	0.92553	0.92553	0.92553	0.92553	0.92553	0.92553	0.92553
19	clusters	0.8725	0.8725	0.8725	0.8725	0.8725	0.8725	0.8725	0.8725	0.8725	0.8725	0.8725	0.8725	0.8725	0.8725	0.8725	0.8725	0.8725	0.8725	0.8725	0.8725	0.8725	0.8725	0.8725	0.8725	0.8725	0.8725	0.8725	0.8725	0.8725	0.8725	0.8725	0.8725	0.8725	0.8725	0.8725	0.8725	0.8725	0.8725	0.8725	0.8725	0.8725	0.8725	0.8725	0.8725	0.8725	0.8725	0.8725	0.8725
20	fret	0.892423	0.466522	0.951963	0.947485	0.912372	0.847617	0.932218	0.935816	0.942103	0.927717	0.909658	0.918698	0.92321	0.889694	0.843936	0.909658	0.908752	0.918698	0.815293	0.829179	0.876936	0.954648	0.892423	0.913276	0.7827	0.91418	0.547686	0.13693	0.224756	0.903317	0.953753	0.881497	0.865967	0.969825	0.903317	0.87511	0.852212	0.906941	0.852212	0.949277	0.912372	0.79204	0.787372	0.866883	0.786438	0.743226
20	states	0.905129	0.345639	0.905129	0.905129	0.905129	0.905129	0.905129	0.905129	0.905129	0.905129	0.905129	0.905129	0.905129	0.905129	0.905129	0.905129	0.905129	0.905129	0.905129	0.905129	0.905129	0.905129	0.905129	0.905129	0.905129	0.905129	0.345639	0.345639	0.345639	0.905129	0.905129	0.905129	0.905129	0.905129	0.905129	0.905129	0.905129	0.905129	0.905129	0.905129	0.905129	0.905129	0.905129	0.905129	0.905129	0.905129
20	clusters	0.8725	0.350764	0.8725	0.8725	0.8725	0.8725	0.8725	0.8725	0.8725	0.8725	0.8725	0.8725	0.8725	0.8725	0.8725	0.8725	0.8725	0.8725	0.8725	0.8725	0.8725	0.8725	0.8725	0.8725	0.8725	0.8725	0.350764	0.350764	0.350764	0.8725	0.8725	0.8725	0.8725	0.8725	0.8725	0.8725	0.8725	0.8725	0.8725	0.8725	0.8725	0.8725	0.8725	0.8725	0.8725	0.8725
21	fret	0.992642	0.894062	0.927314	0.942896	0.960989	0.871733	0.923732	0.888167	0.984083	0.79903	0.840326	0.825338	0.881112	0.895242	0.985304	0.894062	0.922538	0.816157	0.75838	0.907075	0.959779	0.888167	0.865889	0.938092	0.843797	0.913012	0.901152	0.91539	0.91539	0.946505	0.933296	0.921346	0.977986	0.772986	0.911824	0.860057	0.908262	0.891702	0.923732	0.883461	0.853076	1.05333	0.917771	0.853076	0.947709	0.914201	0.876418	1
21	states	0.901152	0.901152	0.901152	0.901152	0.901152	0.901152	0.901152	0.901152	0.901152	0.901152	0.901152	0.901152	0.901152	0.901152	0.901152	0.901152	0.901152	0.901152	0.901152	0.901152	0.901152	0.901152	0.901152	0.901152	0.901152	0.901152	0.901152	0.901152	0.901152	0.901152	0.901152	0.901152	0.901152	0.901152	0.901152	0.901152	0.901152	0.901152	0.901152	0.901152	0.901152	0.901152	0.901152	0.901152	0.901152	0.901152	0.901152	0.901152
21	clusters	0.8725	0.8725	0.8725	0.8725	0.8725	0.8725	0.8725	0.8725	0.8725	0.8725	0.8725	0.8725	0.8725	0.8725	0.8725	0.8725	0.8725	0.8725	0.8725	0.8725	0.8725	0.8725	0.8725	0.8725	0.8725	0.8725	0.8725	0.8725	0.8725	0.8725	0.8725	0.8725	0.8725	0.8725	0.8725	0.8725	0.8725	0.8725	0.8725	0.8725	0.8725	0.8725	0.8725	0.8725	0.8725	0.8725	0.8725	0.8725
22	fret	0.357274	0.353521	0.310519	0.310519	0.319181	0.307096	0.296133	0.288684	0.277319	0.340599	0.321809	0.329777	0.329777	0.314832	0.360106	0.296967	0.310519	0.295299	0.304545	0.311379	0.280539	0.356333	0.305394	0.344228	0.370623	0.310519	0.305394	0.279732	0.316567	0.237337	0.292808	0.303697	0.303697	0.360106	0.328886	0.316567	0.315699	0.31224	0.279732	0.35916	0.30795	0.343311	0.337872	0.313102	0.319181	0.309661	0.342426	0.351624
22	states	0.310519	0.310519	0.310519	0.310519	0.310519	0.310519	0.310519	0.310519	0.310519	0.310519	0.310519	0.310519	0.310519	0.310519	0.310519	0.310519	0.310519	0.310519	0.310519	0.310519	0.310519	0.310519	0.310519	0.310519	0.310519	0.310519	0.310519	0.310519	0.310519	0.310519	0.310519	0.310519	0.310519	0.310519	0.310519	0.310519	0.310519	0.310519	0.310519	0.310519	0.310519	0.310519	0.310519	0.310519	0.310519	0.310519	0.310519	0.310519
22	clusters	0.350764	0.350764	0.350764	0.350764	0.350764	0.350764	0.350764	0.350764	0.350764	0.350764	0.350764	0.350764	0.350764	0.350764	0.350764	0.350764	0.350764	0.350764	0.350764	0.350764	0.350764	0.350764	0.350764	0.350764	0.350764	0.350764	0.350764	0.350764	0.350764	0.350764	0.350764	0.350764	0.350764	0.350764	0.350764	0.350764	0.350764	0.350764	0.350764	0.350764	0.350764	0.350764	0.350764	0.350764	0.350764	0.350764	0.350764	0.350764
23	fret	0.927544	0.866014	0.903511	0.918133	0.93173	0.916043	0.924406	0.882662	0.919178	0.876415	0.861857	0.872254	0.841096	0.789389	0.929637	0.96318	0.872254	0.855624	0.821415	0.981046	0.818311	0.946394	0.828661	0.845245	0.832805	0.892038	0.875375	0.901424	0.837986	0.884745	0.910819	0.890996	0.903511	0.916043	0.917088	0.899338	0.950587	0.841096	0.82659	0.968431	0.779081	0.270498	0.404273	0.882662	0.82038	0.852509	0.939059	0.907687
23	states	0.883703	0.883703	0.883703	0.883703	0.883703	0.883703	0.883703	0.883703	0.883703	0.883703	0.883703	0.883703	0.883703	0.883703	0.883703	0.883703	0.883703	0.883703	0.883703	0.883703	0.883703	0.883703	0.883703	0.883703	0.883703	0.883703	0.883703	0.883703	0.883703	0.883703	0.883703	0.883703	0.883703	0.883703	0.883703	0.883703	0.883703	0.883703	0.883703	0.883703	0.883703	0.337385	0.337385	0.883703	0.883703	0.883703	0.883703	0.883703
23	clusters	0.8725	0.8725	0.8725	0.8725	0.8725	0.8725	0.8725	0.8725	0.8725	0.8725	0.8725	0.8725	0.8725	0.8725	0.8725	0.8725	0.8725	0.8725	0.8725	0.8725	0.8725	0.8725	0.8725	0.8725	0.8725	0.8725	0.8725	0.8725	0.8725	0.8725	0.8725	0.8725	0.8725	0.8725	0.8725	0.8725	0.8725	0.8725	0.8725	0.8725	0.8725	0.350764	0.350764	0.8725	0.8725	0.8725	0.8725	0.8725
24	fret	0.932992	0.925785	0.803959	0.916207	0.826942	0.858301	0.793684	0.847805	0.913818	0.909046	0.923387	0.932992	0.859469	0.816574	0.870013	0.920992	0.816574	0.875889	0.917402	0.913818	0.903094	0.919795	0.916207	0.899529	0.835035	0.756363	0.808539	0.872362	0.886501	0.904283	0.875889	0.885319	0.893599	0.93179	0.69756	0.867666	0.837352	0.600795	0.375557	0.998766	0.823481	0.923387	0.835035	0.911431	0.831563	0.766487	0.894784	0.877066
24	states	0.886501	0.886501	0.886501	0.886501	0.886501	0.886501	0.886501	0.886501	0.886501	0.886501	0.886501	0.886501	0.886501	0.886501	0.886501	0.886501	0.886501	0.886501	0.886501	0.886501	0.886501	0.886501	0.886501	0.886501	0.886501	0.886501	0.886501	0.886501	0.886501	0.886501	0.886501	0.886501	0.886501	0.886501	0.886501	0.886501	0.886501	0.328573	0.328573	0.886501	0.886501	0.886501	0.886501	0.886501	0.886501	0.886501	0.886501	0.886501
24	clusters	0.8725	0.8725	0.8725	0.8725	0.8725	0.8725	0.8725	0.8725	0.8725	0.8725	0.8725	0.8725	0.8725	0.8725	0.8725	0.8725	0.8725	0.8725	0.8725	0.8725	0.8725	0.8725	0.8725	0.8725	0.8725	0.8725	0.8725	0.8725	0.8725	0.8725	0.8725	0.8725	0.8725	0.8725	0.8725	0.8725	0.8725	0.350764	0.350764	0.8725	0.8725	0.8725	0.8725	0.8725	0.8725	0.8725	0.8725	0.8725
25	fret	0.703297	0.94322	0.87487	0.704638	0.857649	0.764026	0.827024	0.921611	0.867008	0.941542	0.644762	0.707325	0.491159	0.624761	0.652369	0.680776	0.687348	0.467877	0.809061	0.735974	0.879614	0.801666	0.642239	0.510667	0.505206	0.605166	0.818005	0.998237	1.3011	0.887567	0.483685	0.806097	0.639723	0.67555	0.772593	0.711321	0.810547	0.819503	0.916683	0.756941	0.926561	0.723597	0.982494	0.803141	0.916683	0.824009	0.821003	0.834599
25	states	0.794322	0.794322	0.794322	0.794322	0.794322	0.794322	0.794322	0.794322	0.794322	0.794322	0.794322	0.794322	0.794322	0.794322	0.794322	0.794322	0.794322	0.548694	0.794322	0.794322	0.794322	0.794322	0.548694	0.548694	0.548694	0.548694	0.794322	0.794322	0.794322	0.794322	0.548694	0.794322	0.794322	0.794322	0.794322	0.794322	0.794322	0.794322	0.794322	0.794322	0.794322	0.794322	0.794322	0.794322	0.794322	0.794322	0.794322	0.794322
25	clusters	0.8725	0.8725	0.8725	0.8725	0.8725	0.8725	0.8725	0.8725	0.8725	0.8725	0.8725	0.8725	0.8725	0.8725	0.8725	0.8725	0.8725	0.561256	0.8725	0.8725	0.8725	0.8725	0.561256	0.561256	0.561256	0.561256	0.8725	0.8725	0.8725	0.8725	0.561256	0.8725	0.8725	0.8725	0.8725	0.8725	0.8725	0.8725	0.8725	0.8725	0.8725	0.8725	0.8725	0.8725	0.8725	0.8725	0.8725	0.8725
26	fret	0.276049	0.273375	0.246888	0.234678	0.150145	0.222562	0.245138	0.337866	0.183405	0.190989	0.200308	0.298503	0.291283	0.217398	0.188457	0.25215	0.267155	0.246012	0.268042	0.258311	0.244263	0.266268	0.271596	0.322194	0.22515	0.185087	0.202009	0.213108	0.265382	0.213965	0.285889	0.218258	0.253908	0.262727	0.276049	0.308483	0.284088	0.258311	0.304847	0.336023	0.231206	0.313041	0.35184	0.307573	0.300313	0.3314	0.273375	0.257429
26	states	0.270706	0.270706	0.270706	0.270706	0.270706	0.270706	0.270706	0.270706	0.270706	0.270706	0.270706	0.270706	0.270706	0.270706	0.270706	0.270706	0.270706	0.270706	0.270706	0.270706	0.270706	0.270706	0.270706	0.270706	0.270706	0.270706	0.270706	0.270706	0.270706	0.270706	0.270706	0.270706	0.270706	0.270706	0.270706	0.270706	0.270706	0.270706	0.270706	0.270706	0.270706	0.270706	0.270706	0.270706	0.270706	0.270706	0.270706	0.270706
26	clusters	0.350764	0.350764	0.350764	0.350764	0.350764	0.350764	0.350764	0.350764	0.350764	0.350764	0.350764	0.350764	0.350764	0.350764	0.350764	0.350764	0.350764	0.350764	0.350764	0.350764	0.350764	0.350764	0.350764	0.350764	0.350764	0.350764	0.350764	0.350764	0.350764	0.350764	0.350764	0.350764	0.350764	0.350764	0.350764	0.350764	0.350764	0.350764	0.350764	0.350764	0.350764	0.350764	0.350764	0.350764	0.350764	0.350764	0.350764	0.350764
27	fret	0.152088	0.0618441	0.0322062	0.140489	0.150534	0.129772	0.0762525	0.0982331	0.120668	0.184421	0.0923278	0.076978	0.150534	0.137416	0.0893871	0.159106	0.138184	0.142028	0.186824	0.239327	0.334591	0.0835298	0.119912	0.128249	0.0554232	0.132059	0.0690241	0.0589856	0.145887	0.104915	0.190839	0.266504	0.147429	0.182822	0.108645	0.100452	0.0938011	0.0813414	0.14357	0.12218	-0.0233509	0.147429	0.282074	0.244375	0.181225	0.0952764	0.0827998	0.0426963
27	states	0.10678	0.10678	0.10678	0.10678	0.10678	0.10678	0.10678	0.10678	0.10678	0.10678	0.10678	0.10678	0.10678	0.10678	0.10678	0.10678	0.10678	0.10678	0.10678	0.282074	0.282074	0.10678	0.10678	0.10678	0.10678	0.10678	0.10678	0.10678	0.10678	0.10678	0.10678	0.282074	0.10678	0.10678	0.10678	0.10678	0.10678	0.10678	0.10678	0.10678	0.10678	0.10678	0.282074	0.282074	0.10678	0.10678	0.10678	0.10678
27	clusters	0.11666	0.11666	0.11666	0.11666	0.11666	0.11666	0.11666	0.11666	0.11666	0.11666	0.11666	0.11666	0.11666	0.11666	0.11666	0.11666	0.11666	0.11666	0.11666	0.350764	0.350764	0.11666	0.11666	0.11666	0.11666	0.11666	0.11666	0.11666	0.11666	0.11666	0.11666	0.350764	0.11666	0.11666	0.11666	0.11666	0.11666	0.11666	0.11666	0.11666	0.11666	0.11666	0.350764	0.350764	0.11666	0.11666	0.11666	0.11666
28	fret	0.118137	0.103799	0.0617411	0.134507	0.143708	0.0668759	0.069956	0.0771407	0.0761145	0.069956	0.0401577	0.156989	0.0997009	0.0381007	0.129393	0.122231	0.0576321	0.117113	0.0863735	0.0822707	0.0761145	0.0144267	0.0997009	0.0617411	0.0771407	0.0956013	0.11097	0.0781668	0.0668759	0.113018	0.0308992	0.0904754	0.141663	0.0432428	0.139619	0.113018	-0.0113441	0.0463273	0.00618442	0.0103061	0.0637952	0.0956013	0.0175166	0.0627682	0.0586595	0.0853479	0.028841	0.0802189
28	states	0.0776537	0.0776537	0.0776537	0.0776537	0.0776537	0.0776537	0.0776537	0.0776537	0.0776537	0.0776537	0.0776537	0.0776537	0.0776537	0.0776537	0.0776537	0.0776537	0.0776537	0.0776537	0.0776537	0.0776537	0.0776537	0.0776537	0.0776537	0.0776537	0.0776537	0.0776537	0.0776537	0.0776537	0.0776537	0.0776537	0.0776537	0.0776537	0.0776537	0.0776537	0.0776537	0.0776537	0.0776537	0.0776537	0.0776537	0.0776537	0.0776537	0.0776537	0.0776537	0.0776537	0.0776537	0.0776537	0.0776537	0.0776537
28	clusters	0.11666	0.11666	0.11666	0.11666	0.11666	0.11666	0.11666	0.11666	0.11666	0.11666	0.11666	0.11666	0.11666	0.11666	0.11666	0.11666	0.11666	0.11666	0.11666	0.11666	0.11666	0.11666	0.11666	0.11666	0.11666	0.11666	0.11666	0.11666	0.11666	0.11666	0.11666	0.11666	0.11666	0.11666	0.11666	0.11666	0.11666	0.11666	0.11666	0.11666	0.11666	0.11666	0.11666	0.11666	0.11666	0.11666	0.11666	0.11666
29	fret	0.717014	0.957522	0.775808	0.727049	0.781048	0.786309	0.647712	0.865026	0.9471	0.739668	0.79424	0.808904	0.755055	0.74094	0.834621	0.775808	0.944136	0.788947	0.737163	0.849738	0.948584	0.807565	0.722022	0.874845	0.799554	1.07264	0.821024	0.723277	0.846976	0.845598	0.932344	0.870628	0.777116	0.771892	0.786309	0.862233	0.823733	0.621953	0.906172	0.700872	0.732096	0.767987	0.678853	0.781048	0.730833	0.784992	0.777116	0.872032
29	states	0.824411	0.824411	0.824411	0.824411	0.824411	0.824411	0.824411	0.824411	0.824411	0.824411	0.824411	0.824411	0.824411	0.824411	0.824411	0.824411	0.824411	0.824411	0.824411	0.824411	0.824411	0.824411	0.824411	0.824411	0.824411	0.824411	0.824411	0.824411	0.824411	0.824411	0.824411	0.824411	0.824411	0.824411	0.824411	0.824411	0.824411	0.824411	0.824411	0.824411	0.824411	0.824411	0.824411	0.824411	0.824411	0.824411	0.824411	0.824411
29	clusters	0.8725	0.8725	0.8725	0.8725	0.8725	0.8725	0.8725	0.8725	0.8725	0.8725	0.8725	0.8725	0.8725	0.8725	0.8725	0.8725	0.8725	0.8725	0.8725	0.8725	0.8725	0.8725	0.8725	0.8725	0.8725	0.8725	0.8725	0.8725	0.8725	0.8725	0.8725	0.8725	0.8725	0.8725	0.8725	0.8725	0.8725	0.8725	0.8725	0.8725	0.8725	0.8725	0.8725	0.8725	0.8725	0.8725	0.8725	0.8725
30	fret	0.965337	0.841043	0.975701	0.921907	0.909433	0.822217	0.986095	0.701722	0.308291	0.948131	0.928729	0.835495	0.983783	0.871151	0.802393	0.642485	0.839933	0.80459	0.783772	0.798002	0.852164	0.952711	0.734956	0.946987	0.925317	0.938988	0.951566	0.422224	0.140039	0.469717	0.926454	0.852164	0.972243	0.795797	0.826637	0.807888	0.817802	0.870031	0.866674	0.986095	0.822217	0.808988	0.943556	0.945843	0.874512	0.872271	0.989566	0.904908
30	states	0.887989	0.887989	0.887989	0.887989	0.887989	0.887989	0.887989	0.887989	0.132842	0.887989	0.887989	0.887989	0.887989	0.887989	0.887989	0.887989	0.887989	0.887989	0.887989	0.887989	0.887989	0.887989	0.887989	0.887989	0.887989	0.887989	0.887989	0.132842	0.132842	0.132842	0.887989	0.887989	0.887989	0.887989	0.887989	0.887989	0.887989	0.887989	0.887989	0.887989	0.887989	0.887989	0.887989	0.887989	0.887989	0.887989	0.887989	0.887989
30	clusters	0.8725	0.8725	0.8725	0.8725	0.8725	0.8725	0.8725	0.8725	0.11666	0.8725	0.8725	0.8725	0.8725	0.8725	0.8725	0.8725	0.8725	0.8725	0.8725	0.8725	0.8725	0.8725	0.8725	0.8725	0.8725	0.8725	0.8725	0.11666	0.11666	0.11666	0.8725	0.8725	0.8725	0.8725	0.8725	0.8725	0.8725	0.8725	0.8725	0.8725	0.8725	0.8725	0.8725	0.8725	0.8725	0.8725	0.8725	0.8725
31	fret	0.613876	0.537178	0.613876	0.654557	0.54842	0.517268	0.500987	0.635863	0.609054	0.716718	0.652044	0.638335	0.736985	0.534945	0.446634	0.527171	0.772971	0.658337	0.549551	0.616295	0.639574	0.681315	0.662131	0.484981	0.549551	0.627255	0.613876	0.512899	0.60306	0.655815	0.680025	0.434507	0.279564	0.611462	0.55409	0.626031	0.626031	0.72885	0.463023	0.541659	0.682606	0.591178	0.706134	0.715429	0.689089	0.619935	0.440562	0.593543
31	states	0.58119	0.58119	0.58119	0.58119	0.58119	0.58119	0.58119	0.58119	0.58119	0.58119	0.58119	0.58119	0.58119	0.58119	0.58119	0.58119	0.58119	0.58119	0.58119	0.58119	0.58119	0.58119	0.58119	0.58119	0.58119	0.58119	0.58119	0.58119	0.58119	0.58119	0.58119	0.427544	0.427544	0.427544	0.58119	0.58119	0.58119	0.58119	0.58119	0.58119	0.58119	0.58119	0.58119	0.58119	0.58119	0.58119	0.58119	0.58119
31	clusters	0.561256	0.561256	0.561256	0.561256	0.561256	0.561256	0.561256	0.561256	0.561256	0.561256	0.561256	0.561256	0.561256	0.561256	0.561256	0.561256	0.561256	0.561256	0.561256	0.561256	0.561256	0.561256	0.561256	0.561256	0.561256	0.561256	0.561256	0.561256	0.561256	0.561256	0.561256	0.350764	0.350764	0.350764	0.561256	0.561256	0.561256	0.561256	0.561256	0.561256	0.561256	0.561256	0.561256	0.561256	0.561256	0.561256	0.561256	0.561256
32	fret	0.394188	0.393177	0.418415	0.420432	0.473724	0.353689	0.372945	0.419424	0.441578	0.449624	0.440572	0.376995	0.362815	0.419424	0.420432	0.43856	0.433527	0.449624	0.440572	0.390145	0.354705	0.427484	0.427484	0.451634	0.439566	0.494767	0.423454	0.398229	0.428491	0.406308	0.436547	0.477735	0.400249	0.427484	0.496768	0.401259	0.352675	0.422446	0.372945	0.403279	0.367881	0.396209	0.446607	0.367881	0.402269	0.423454	0.421438	0.366868
32	states	0.419424	0.419424	0.419424	0.419424	0.419424	0.419424	0.419424	0.419424	0.419424	0.419424	0.419424	0.419424	0.419424	0.419424	0.419424	0.419424	0.419424	0.419424	0.419424	0.419424	0.419424	0.419424	0.419424	0.419424	0.419424	0.419424	0.419424	0.419424	0.419424	0.419424	0.419424	0.419424	0.419424	0.419424	0.419424	0.419424	0.419424	0.419424	0.419424	0.419424	0.419424	0.419424	0.419424	0.419424	0.419424	0.419424	0.419424	0.419424
32	clusters	0.350764	0.350764	0.350764	0.350764	0.350764	0.350764	0.350764	0.350764	0.350764	0.350764	0.350764	0.350764	0.350764	0.350764	0.350764	0.350764	0.350764	0.350764	0.350764	0.350764	0.350764	0.350764	0.350764	0.350764	0.350764	0.350764	0.350764	0.350764	0.350764	0.350764	0.350764	0.350764	0.350764	0.350764	0.350764	0.350764	0.350764	0.350764	0.350764	0.350764	0.350764	0.350764	0.350764	0.350764	0.350764	0.350764	0.350764	0.350764
33	fret	0.857542	0.233185	0.00181522	0.873663	0.836122	0.882281	0.798836	0.641997	0.911469	0.944089	0.907135	0.881203	1.09449	0.815853	0.894153	0.795661	0.991191	1.04537	0.947362	0.784006	0.853251	0.787182	1.07769	0.973617	0.79036	0.727161	1.00662	0.841469	0.86291	0.949545	0.914722	0.922321	0.919063	1.02984	0.926667	0.359348	0.795661	0.94518	0.959379	0.979102	0.933194	0.944089	0.84468	0.722974	0.957192	0.886595	0.959379	0.903887
33	states	0.891993	0.355449	0.355449	0.891993	0.891993	0.891993	0.891993	0.891993	0.891993	0.891993	0.891993	0.891993	0.891993	0.891993	0.891993	0.891993	0.891993	0.891993	0.891993	0.891993	0.891993	0.891993	0.891993	0.891993	0.891993	0.891993	0.891993	0.891993	0.891993	0.891993	0.891993	0.891993	0.891993	0.891993	0.891993	0.355449	0.891993	0.891993	0.891993	0.891993	0.891993	0.891993	0.891993	0.891993	0.891993	0.891993	0.891993	0.891993
33	clusters	0.8725	0.350764	0.350764	0.8725	0.8725	0.8725	0.8725	0.8725	0.8725	0.8725	0.8725	0.8725	0.8725	0.8725	0.8725	0.8725	0.8725	0.8725	0.8725	0.8725	0.8725	0.8725	0.8725	0.8725	0.8725	0.8725	0.8725	0.8725	0.8725	0.8725	0.8725	0.8725	0.8725	0.8725	0.8725	0.350764	0.8725	0.8725	0.8725	0.8725	0.8725	0.8725	0.8725	0.8725	0.8725	0.8725	0.8725	0.8725
34	fret	0.769931	0.79981	0.900005	0.791403	0.611949	0.877552	0.873865	0.500505	0.723942	0.598698	0.83958	0.981189	0.745823	0.442242	0.580532	0.884974	0.83253	0.855653	0.822062	0.687755	0.742661	0.884974	0.717797	0.77648	0.79981	0.626798	0.750589	0.861077	0.810008	0.756986	0.873865	0.664513	0.69516	0.886839	0.753782	0.926927	0.857458	0.972948	0.898112	0.565309	0.593462	0.574151	0.655972	0.664513	0.758594	0.513194	0.83958	0.748997
34	states	0.798122	0.798122	0.798122	0.798122	0.650329	0.798122	0.798122	0.650329	0.798122	0.650329	0.798122	0.798122	0.798122	0.650329	0.650329	0.798122	0.798122	0.798122	0.798122	0.650329	0.798122	0.798122	0.798122	0.798122	0.798122	0.650329	0.798122	0.798122	0.798122	0.798122	0.798122	0.650329	0.650329	0.798122	0.798122	0.798122	0.798122	0.798122	0.798122	0.650329	0.650329	0.650329	0.650329	0.650329	0.798122	0.650329	0.798122	0.798122
34	clusters	0.8725	0.8725	0.8725	0.8725	0.561256	0.8725	0.8725	0.561256	0.8725	0.561256	0.8725	0.8725	0.8725	0.561256	0.561256	0.8725	0.8725	0.8725	0.8725	0.561256	0.8725	0.8725	0.8725	0.8725	0.8725	0.561256	0.8725	0.8725	0.8725	0.8725	0.8725	0.561256	0.561256	0.8725	0.8725	0.8725	0.8725	0.8725	0.8725	0.561256	0.561256	0.561256	0.561256	0.561256	0.8725	0.561256	0.8725	0.8725
35	fret	0.286329	0.271018	0.339177	0.352844	0.272707	0.334663	0.310637	0.31681	0.344622	0.300131	0.31681	0.332863	0.294076	0.300131	0.376984	0.352844	0.315926	0.322132	0.0613166	0.243569	0.323913	0.3667	0.281198	0.294076	0.305377	0.36206	0.319467	0.342804	0.284615	0.328378	0.306252	0.350096	0.305377	0.331965	0.341896	0.332863	0.348268	0.331067	0.320355	0.334663	0.323022	0.31416	0.352844	0.313278	0.306252	0.26011	0.26849	0.358363
35	states	0.31416	0.31416	0.31416	0.31416	0.31416	0.31416	0.31416	0.31416	0.31416	0.31416	0.31416	0.31416	0.31416	0.31416	0.31416	0.31416	0.31416	0.31416	0.153018	0.153018	0.31416	0.31416	0.31416	0.31416	0.31416	0.31416	0.31416	0.31416	0.31416	0.31416	0.31416	0.31416	0.31416	0.31416	0.31416	0.31416	0.31416	0.31416	0.31416	0.31416	0.31416	0.31416	0.31416	0.31416	0.31416	0.31416	0.31416	0.31416
35	clusters	0.350764	0.350764	0.350764	0.350764	0.350764	0.350764	0.350764	0.350764	0.350764	0.350764	0.350764	0.350764	0.350764	0.350764	0.350764	0.350764	0.350764	0.350764	0.11666	0.11666	0.350764	0.350764	0.350764	0.350764	0.350764	0.350764	0.350764	0.350764	0.350764	0.350764	0.350764	0.350764	0.350764	0.350764	0.350764	0.350764	0.350764	0.350764	0.350764	0.350764	0.350764	0.350764	0.350764	0.350764	0.350764	0.350764	0.350764	0.350764
36	fret	0.886001	1.01995	1.00819	0.959259	0.97085	0.950015	1.05191	0.987143	0.974335	0.954634	0.890533	1.01879	0.985977	0.930454	0.834313	0.854444	0.815411	0.812087	0.826517	0.856688	0.922432	0.951169	0.965049	1.05786	0.94425	0.97666	1.04005	0.936195	1.0294	1.20503	1.05548	0.968528	1.19016	0.78561	0.962732	0.819849	1.02704	0.933897	1.01879	0.917856	0.96389	0.893937	0.747373	1.10704	0.930454	0.917856	1.02704	0.89848
36	states	0.949438	0.949438	0.949438	0.949438	0.949438	0.949438	0.949438	0.949438	0.949438	0.949438	0.949438	0.949438	0.949438	0.949438	0.949438	0.949438	0.949438	0.949438	0.949438	0.949438	0.949438	0.949438	0.949438	0.949438	0.949438	0.949438	0.949438	0.949438	0.949438	0.949438	0.949438	0.949438	0.949438	0.949438	0.949438	0.949438	0.949438	0.949438	0.949438	0.949438	0.949438	0.949438	0.949438	0.949438	0.949438	0.949438	0.949438	0.949438
36	clusters	0.8725	0.8725	0.8725	0.8725	0.8725	0.8725	0.8725	0.8725	0.8725	0.8725	0.8725	0.8725	0.8725	0.8725	0.8725	0.8725	0.8725	0.8725	0.8725	0.8725	0.8725	0.8725	0.8725	0.8725	0.8725	0.8725	0.8725	0.8725	0.8725	0.8725	0.8725	0.8725	0.8725	0.8725	0.8725	0.8725	0.8725	0.8725	0.8725	0.8725	0.8725	0.8725	0.8725	0.8725	0.8725	0.8725	0.8725	0.8725
37	fret	0.753136	0.851741	0.879854	0.824338	0.726785	0.825842	0.785958	0.818343	0.791773	0.783063	0.764435	0.77156	0.112229	0.654156	0.824338	0.206394	0.0343991	0.256668	0.0452547	0.761599	0.89579	0.918493	0.845591	0.806452	0.791773	0.887794	0.747532	0.77156	0.802027	0.744741	0.876695	0.728155	0.679961	0.683891	0.471582	0.807931	0.83188	0.686519	0.638991	0.715842	0.778734	0.783063	0.796155	0.76728	0.743349	0.763016	0.939996	0.698431
37	states	0.788861	0.788861	0.788861	0.788861	0.788861	0.788861	0.788861	0.788861	0.788861	0.788861	0.788861	0.788861	0.206394	0.788861	0.788861	0.206394	0.206394	0.206394	0.206394	0.788861	0.788861	0.788861	0.788861	0.788861	0.788861	0.788861	0.788861	0.788861	0.788861	0.788861	0.788861	0.788861	0.788861	0.788861	0.206394	0.788861	0.788861	0.788861	0.788861	0.788861	0.788861	0.788861	0.788861	0.788861	0.788861	0.788861	0.788861	0.788861
37	clusters	0.8725	0.8725	0.8725	0.8725	0.8725	0.8725	0.8725	0.8725	0.8725	0.8725	0.8725	0.8725	0.11666	0.8725	0.8725	0.11666	0.11666	0.11666	0.11666	0.8725	0.8725	0.8725	0.8725	0.8725	0.8725	0.8725	0.8725	0.8725	0.8725	0.8725	0.8725	0.8725	0.8725	0.8725	0.11666	0.8725	0.8725	0.8725	0.8725	0.8725	0.8725	0.8725	0.8725	0.8725	0.8725	0.8725	0.8725	0.8725
38	fret	0.950796	0.931378	0.92052	0.898944	0.965458	1.01245	0.826015	0.864567	0.879919	0.927754	0.864567	0.821383	0.0381919	0.0745915	0.270208	0.896558	0.97651	0.872822	0.888225	0.922929	0.457921	0.081278	0.127829	0.427328	0.931378	0.827175	0.858687	0.931378	0.896558	0.907313	0.743933	0.838799	0.92534	0.804087	0.871641	0.897751	0.939855	0.960561	0.624715	0.924134	0.754044	0.821383	0.835306	0.859862	0.896558	0.846969	0.769857	0.709423
38	states	0.875185	0.875185	0.875185	0.875185	0.875185	0.875185	0.875185	0.875185	0.875185	0.875185	0.875185	0.875185	0.101466	0.101466	0.101466	0.875185	0.875185	0.875185	0.875185	0.875185	0.101466	0.101466	0.101466	0.101466	0.875185	0.875185	0.875185	0.875185	0.875185	0.875185	0.875185	0.875185	0.875185	0.875185	0.875185	0.875185	0.875185	0.875185	0.875185	0.875185	0.875185	0.875185	0.875185	0.875185	0.875185	0.875185	0.875185	0.875185
38	clusters	0.8725	0.8725	0.8725	0.8725	0.8725	0.8725	0.8725	0.8725	0.8725	0.8725	0.8725	0.8725	0.11666	0.11666	0.11666	0.8725	0.8725	0.8725	0.8725	0.8725	0.11666	0.11666	0.11666	0.11666	0.8725	0.8725	0.8725	0.8725	0.8725	0.8725	0.8725	0.8725	0.8725	0.8725	0.8725	0.8725	0.8725	0.8725	0.8725	0.8725	0.8725	0.8725	0.8725	0.8725	0.8725	0.8725	0.8725	0.8725
39	fret	0.234172	0.314849	0.249931	0.303737	0.0934516	0.32708	0.179718	0.195143	0.213911	0.237136	0.425372	0.192424	0.27015	0.32093	0.273333	0.316579	0.434907	0.335091	0.286264	0.265413	0.348708	0.410839	0.325315	0.318315	0.3333	0.297848	0.147224	0.305431	0.356111	0.283815	0.325315	0.35055	0.307983	0.266987	0.266199	0.233434	0.335988	0.227568	0.311405	0.255296	0.331516	0.212496	0.345958	0.142951	0.173166	0.364527	0.21038	0.349628
39	states	0.289548	0.289548	0.289548	0.289548	0.289548	0.289548	0.289548	0.289548	0.289548	0.289548	0.289548	0.289548	0.289548	0.289548	0.289548	0.289548	0.289548	0.289548	0.289548	0.289548	0.289548	0.289548	0.289548	0.289548	0.289548	0.289548	0.289548	0.289548	0.289548	0.289548	0.289548	0.289548	0.289548	0.289548	0.289548	0.289548	0.289548	0.289548	0.289548	0.289548	0.289548	0.289548	0.289548	0.289548	0.289548	0.289548	0.289548	0.289548
39	clusters	0.350764	0.350764	0.350764	0.350764	0.350764	0.350764	0.350764	0.350764	0.350764	0.350764	0.350764	0.350764	0.350764	0.350764	0.350764	0.350764	0.350764	0.350764	0.350764	0.350764	0.350764	0.350764	0.350764	0.350764	0.350764	0.350764	0.350764	0.350764	0.350764	0.350764	0.350764	0.350764	0.350764	0.350764	0.350764	0.350764	0.350764	0.350764	0.350764	0.350764	0.350764	0.350764	0.350764	0.350764	0.350764	0.350764	0.350764	0.350764
40	fret	0.906374	0.723224	0.781458	0.809403	0.61123	0.319242	0.480562	0.551109	0.544879	0.59843	0.550069	0.434832	0.559444	0.474539	0.363355	0.579374	0.716474	0.505834	0.396847	0.463543	0.326682	0.293413	0.317387	0.398778	0.431885	0.655551	0.542806	0.463543	0.420139	0.398778	0.714228	0.45459	0.551109	0.545916	0.843643	0.525271	0.266124	0.246346	0.399744	0.33415	0.220578	0.231199	0.345405	0.466536	0.357669	0.410401	0.330413	0.270647
40	states	0.753862	0.753862	0.753862	0.753862	0.497722	0.345875	0.497722	0.497722	0.497722	0.497722	0.497722	0.497722	0.497722	0.497722	0.497722	0.497722	0.753862	0.497722	0.345875	0.345875	0.345875	0.345875	0.345875	0.345875	0.497722	0.753862	0.497722	0.497722	0.497722	0.497722	0.753862	0.497722	0.497722	0.497722	0.753862	0.497722	0.345875	0.345875	0.345875	0.345875	0.345875	0.345875	0.345875	0.345875	0.345875	0.345875	0.345875	0.345875
40	clusters	0.8725	0.8725	0.8725	0.8725	0.561256	0.350764	0.561256	0.561256	0.561256	0.561256	0.561256	0.561256	0.561256	0.561256	0.561256	0.561256	0.8725	0.561256	0.350764	0.350764	0.350764	0.350764	0.350764	0.350764	0.561256	0.8725	0.561256	0.561256	0.561256	0.561256	0.8725	0.561256	0.561256	0.561256	0.8725	0.561256	0.350764	0.350764	0.350764	0.350764	0.350764	0.350764	0.350764	0.350764	0.350764	0.350764	0.350764	0.350764
41	fret	0.852549	0.928309	0.774488	0.893571	0.813477	0.93249	0.913833	0.757384	0.907704	0.913833	0.866	0.895576	0.831849	0.802652	0.862134	0.774488	0.71943	0.808047	0.799077	0.732419	0.818945	0.93249	0.757384	0.828141	0.837442	0.769317	0.818945	0.724275	0.788445	0.752326	0.866	0.804446	0.883619	0.818945	0.77276	0.8856	0.795517	0.873785	0.793743	0.848746	0.781435	0.730783	0.835574	0.809853	0.799077	0.930397	0.850646	0.920007
41	states	0.823543	0.823543	0.823543	0.823543	0.823543	0.823543	0.823543	0.823543	0.823543	0.823543	0.823543	0.823543	0.823543	0.823543	0.823543	0.823543	0.823543	0.823543	0.823543	0.823543	0.823543	0.823543	0.823543	0.823543	0.823543	0.823543	0.823543	0.823543	0.823543	0.823543	0.823543	0.823543	0.823543	0.823543	0.823543	0.823543	0.823543	0.823543	0.823543	0.823543	0.823543	0.823543	0.823543	0.823543	0.823543	0.823543	0.823543	0.823543
41	clusters	0.8725	0.8725	0.8725	0.8725	0.8725	0.8725	0.8725	0.8725	0.8725	0.8725	0.8725	0.8725	0.8725	0.8725	0.8725	0.8725	0.8725	0.8725	0.8725	0.8725	0.8725	0.8725	0.8725	0.8725	0.8725	0.8725	0.8725	0.8725	0.8725	0.8725	0.8725	0.8725	0.8725	0.8725	0.8725	0.8725	0.8725	0.8725	0.8725	0.8725	0.8725	0.8725	0.8725	0.8725	0.8725	0.8725	0.8725	0.8725
42	fret	0.827643	1.04785	0.944728	0.890659	0.935182	0.946648	0.739206	0.981889	0.767175	0.842993	0.718067	0.876276	0.787952	0.8499	0.989897	0.916374	0.912657	1.06287	1.03725	0.885239	0.888849	1.0101	1.04998	0.975926	1.00601	0.991909	0.910804	0.799346	1.07813	0.853373	1.02249	1.03304	0.952433	0.966068	1.06504	0.987889	0.914514	0.901593	0.969999	0.836139	1.0101	0.814215	0.797709	0.841275	0.920106	0.85686	0.981889	1.0101
42	states	0.911731	0.911731	0.911731	0.911731	0.911731	0.911731	0.911731	0.911731	0.911731	0.911731	0.911731	0.911731	0.911731	0.911731	0.911731	0.911731	0.911731	0.911731	0.911731	0.911731	0.911731	0.911731	0.911731	0.911731	0.911731	0.911731	0.911731	0.911731	0.911731	0.911731	0.911731	0.911731	0.911731	0.911731	0.911731	0.911731	0.911731	0.911731	0.911731	0.911731	0.911731	0.911731	0.911731	0.911731	0.911731	0.911731	0.911731	0.911731
42	clusters	0.8725	0.8725	0.8725	0.8725	0.8725	0.8725	0.8725	0.8725	0.8725	0.8725	0.8725	0.8725	0.8725	0.8725	0.8725	0.8725	0.8725	0.8725	0.8725	0.8725	0.8725	0.8725	0.8725	0.8725	0.8725	0.8725	0.8725	0.8725	0.8725	0.8725	0.8725	0.8725	0.8725	0.8725	0.8725	0.8725	0.8725	0.8725	0.8725	0.8725	0.8725	0.8725	0.8725	0.8725	0.8725	0.8725	0.8725	0.8725
43	fret	0.522352	0.471621	0.556557	0.626762	0.511079	0.587105	0.631079	0.554467	0.563889	0.563889	0.645244	0.615967	0.609518	0.493783	0.592419	0.573354
43	states	0.568621	0.568621	0.568621	0.568621	0.568621	0.568621	0.568621	0.568621	0.568621	0.568621	0.568621	0.568621	0.568621	0.568621	0.568621	0.568621
43	clusters	0.561256	0.561256	0.561256	0.561256	0.561256	0.561256	0.561256	0.561256	0.561256	0.561256	0.561256	0.561256	0.561256	0.561256	0.561256	0.561256
44	fret	0.622284	0.520291	0.581793	0.593731	0.609054	0.650266	0.632316	0.664997	0.658181	0.654784	0.583957	0.617855	0.528633	0.666135	0.580712	0.654784	0.614541	0.641266	0.655916	0.553927	0.654784	0.580712	0.540176	0.567799	0.645759	0.566728	0.548624	0.603565	0.521332	0.603565	0.626747	0.623393	0.676419	0.593731	0.544394	0.620068	0.645759	0.579632	0.602469	0.50683	0.565657	0.583957	0.507861	0.624503	0.568871	0.587208	0.502711	0.614541
44	states	0.601922	0.601922	0.601922	0.601922	0.601922	0.601922	0.601922	0.601922	0.601922	0.601922	0.601922	0.601922	0.601922	0.601922	0.601922	0.601922	0.601922	0.601922	0.601922	0.601922	0.601922	0.601922	0.601922	0.601922	0.601922	0.601922	0.601922	0.601922	0.601922	0.601922	0.601922	0.601922	0.601922	0.601922	0.601922	0.601922	0.601922	0.601922	0.601922	0.601922	0.601922	0.601922	0.601922	0.601922	0.601922	0.601922	0.601922	0.601922
44	clusters	0.561256	0.561256	0.561256	0.561256	0.561256	0.561256	0.561256	0.561256	0.561256	0.561256	0.561256	0.561256	0.561256	0.561256	0.561256	0.561256	0.561256	0.561256	0.561256	0.561256	0.561256	0.561256	0.561256	0.561256	0.561256	0.561256	0.561256	0.561256	0.561256	0.561256	0.561256	0.561256	0.561256	0.561256	0.561256	0.561256	0.561256	0.561256	0.561256	0.561256	0.561256	0.561256	0.561256	0.561256	0.561256	0.561256	0.561256	0.561256
45	fret	0.832876	0.844416	0.862371	0.879307	0.886506	0.907105	0.806999	0.871267	0.86156	0.821245	0.805314	0.850153	0.822079	0.858333	0.888898	0.886506	0.878505	0.88091	0.88091	0.889695	0.850971	0.85752	0.887304	0.873684	0.860748	0.841128	0.881711	0.817905	0.852605	0.845237	0.914951	0.841951	0.852605	0.837008	0.812043	0.822912	0.7858	0.888898	0.925086	0.886506	0.887304	0.864803	0.900798	0.885708	0.897634	0.827072	0.844416	0.840305
45	states	0.86156	0.86156	0.86156	0.86156	0.86156	0.86156	0.86156	0.86156	0.86156	0.86156	0.86156	0.86156	0.86156	0.86156	0.86156	0.86156	0.86156	0.86156	0.86156	0.86156	0.86156	0.86156	0.86156	0.86156	0.86156	0.86156	0.86156	0.86156	0.86156	0.86156	0.86156	0.86156	0.86156	0.86156	0.86156	0.86156	0.86156	0.86156	0.86156	0.86156	0.86156	0.86156	0.86156	0.86156	0.86156	0.86156	0.86156	0.86156
45	clusters	0.8725	0.8725	0.8725	0.8725	0.8725	0.8725	0.8725	0.8725	0.8725	0.8725	0.8725	0.8725	0.8725	0.8725	0.8725	0.8725	0.8725	0.8725	0.8725	0.8725	0.8725	0.8725	0.8725	0.8725	0.8725	0.8725	0.8725	0.8725	0.8725	0.8725	0.8725	0.8725	0.8725	0.8725	0.8725	0.8725	0.8725	0.8725	0.8725	0.8725	0.8725	0.8725	0.8725	0.8725	0.8725	0.8725	0.8725	0.8725
46	fret	0.908924	1.00132	0.93096	0.927052	0.803715	0.801282	0.975817	1.03823	0.938799	0.9946	0.927052	0.902492	0.938799	0.949302	0.919262	0.890969	0.814704	0.977153	0.899925	0.839363	0.745026	0.834405	0.759223	0.856824	0.912794	0.859332	1.00813	0.885871	0.715804	0.791582	0.873186	0.706554	0.966495	0.771141	1.03548	0.978489	0.879518	0.814704	1.02035	0.758036	0.820838	0.906349	0.853068	0.843091	0.938799	0.967824	0.949302	0.864358
46	states	0.888419	0.888419	0.888419	0.888419	0.888419	0.888419	0.888419	0.888419	0.888419	0.888419	0.888419	0.888419	0.888419	0.888419	0.888419	0.888419	0.888419	0.888419	0.888419	0.888419	0.888419	0.888419	0.888419	0.888419	0.888419	0.888419	0.888419	0.888419	0.888419	0.888419	0.888419	0.888419	0.888419	0.888419	0.888419	0.888419	0.888419	0.888419	0.888419	0.888419	0.888419	0.888419	0.888419	0.888419	0.888419	0.888419	0.888419	0.888419
46	clusters	0.8725	0.8725	0.8725	0.8725	0.8725	0.8725	0.8725	0.8725	0.8725	0.8725	0.8725	0.8725	0.8725	0.8725	0.8725	0.8725	0.8725	0.8725	0.8725	0.8725	0.8725	0.8725	0.8725	0.8725	0.8725	0.8725	0.8725	0.8725	0.8725	0.8725	0.8725	0.8725	0.8725	0.8725	0.8725	0.8725	0.8725	0.8725	0.8725	0.8725	0.8725	0.8725	0.8725	0.8725	0.8725	0.8725	0.8725	0.8725
47	fret	0.791338	0.879361	0.904935	0.791338	0.912676	0.748286	0.731819	0.701637	0.881903	0.866705	0.860409	0.818162	0.852883	0.782886	0.861667	0.80592	0.917855	0.894663	0.884448	0.850381	0.828015
47	states	0.852883	0.852883	0.852883	0.852883	0.852883	0.852883	0.852883	0.852883	0.852883	0.852883	0.852883	0.852883	0.852883	0.852883	0.852883	0.852883	0.852883	0.852883	0.852883	0.852883	0.852883
47	clusters	0.8725	0.8725	0.8725	0.8725	0.8725	0.8725	0.8725	0.8725	0.8725	0.8725	0.8725	0.8725	0.8725	0.8725	0.8725	0.8725	0.8725	0.8725	0.8725	0.8725	0.8725
48	fret	0.266768	0.326726	0.344947	0.310559	0.348624	0.306996	0.277999	0.294608	0.364378	0.183824	0.245468	0.220412	0.231203	0.294608	0.385071	0.38602	0.319514	0.411919	0.447308	0.350467	0.193466	0.442333	0.339452	0.301671	0.316808	0.487825	0.265899	0.374681	0.308776	0.312345	0.384123	0.38697	0.434413	0.422627	0.383175	0.335802	0.321313	0.323114	0.376564	0.380338	0.382229	0.335802	0.385071	0.349546	0.291092	0.247158	0.283219	0.340366
48	states	0.323114	0.323114	0.323114	0.323114	0.323114	0.323114	0.323114	0.323114	0.323114	0.323114	0.323114	0.323114	0.323114	0.323114	0.323114	0.323114	0.323114	0.323114	0.323114	0.323114	0.323114	0.323114	0.323114	0.323114	0.323114	0.323114	0.323114	0.323114	0.323114	0.323114	0.323114	0.323114	0.323114	0.323114	0.323114	0.323114	0.323114	0.323114	0.323114	0.323114	0.323114	0.323114	0.323114	0.323114	0.323114	0.323114	0.323114	0.323114
48	clusters	0.350764	0.350764	0.350764	0.350764	0.350764	0.350764	0.350764	0.350764	0.350764	0.350764	0.350764	0.350764	0.350764	0.350764	0.350764	0.350764	0.350764	0.350764	0.350764	0.350764	0.350764	0.350764	0.350764	0.350764	0.350764	0.350764	0.350764	0.350764	0.350764	0.350764	0.350764	0.350764	0.350764	0.350764	0.350764	0.350764	0.350764	0.350764	0.350764	0.350764	0.350764	0.350764	0.350764	0.350764	0.350764	0.350764	0.350764	0.350764
49	fret	0.258127	0.322917	0.413439	0.345273	0.332519	0.350571	0.402011	0.338902	0.348453	0.288533	0.335712	0.264668	0.35903	0.438223	0.403052	0.459741	0.276624	0.353746	0.397845	0.382169	0.282043	0.373775	0.203072	0.287453	0.500301	0.0934056	0.410327	0.317576	0.166193	0.360086	0.276624	0.364304	0.416548	0.310069	0.405132	0.314358	0.298243	0.399929	0.255944	0.269021	0.311142	0.325054	0.343151	0.247194	0.350571	0.342089	0.433076	0.467897
49	states	0.347393	0.347393	0.347393	0.347393	0.347393	0.347393	0.347393	0.347393	0.347393	0.347393	0.347393	0.347393	0.347393	0.347393	0.347393	0.347393	0.347393	0.347393	0.347393	0.347393	0.347393	0.347393	0.347393	0.347393	0.347393	0.347393	0.347393	0.347393	0.347393	0.347393	0.347393	0.347393	0.347393	0.347393	0.347393	0.347393	0.347393	0.347393	0.347393	0.347393	0.347393	0.347393	0.347393	0.347393	0.347393	0.347393	0.347393	0.347393
49	clusters	0.350764	0.350764	0.350764	0.350764	0.350764	0.350764	0.350764	0.350764	0.350764	0.350764	0.350764	0.350764	0.350764	0.350764	0.350764	0.350764	0.350764	0.350764	0.350764	0.350764	0.350764	0.350764	0.350764	0.350764	0.350764	0.350764	0.350764	0.350764	0.350764	0.350764	0.350764	0.350764	0.350764	0.350764	0.350764	0.350764	0.350764	0.350764	0.350764	0.350764	0.350764	0.350764	0.350764	0.350764	0.350764	0.350764	0.350764	0.350764
50	fret	0.334148	0.463079	0.447162	0.420631	0.494328	0.437287	0.250177	0.390669	0.46608	0.475114	0.586251	0.34997	0.384931	0.43139	0.436303	0.37731	0.503525	0.426491	0.60024	0.484196	0.420631	0.453114	0.372564	0.461081	0.501465	0.468084	0.40317	0.341566	0.409939	0.473103	0.416735	0.440244	0.570243	0.397389	0.211908	0.391628	0.483184	0.494328	0.460083	0.432372	0.443205	0.360288	0.465079	0.42747	0.429429	0.479145	0.296599	0.574498
50	states	0.437287	0.437287	0.437287	0.437287	0.437287	0.437287	0.437287	0.437287	0.437287	0.437287	0.437287	0.437287	0.437287	0.437287	0.437287	0.437287	0.437287	0.437287	0.437287	0.437287	0.437287	0.437287	0.437287	0.437287	0.437287	0.437287	0.437287	0.437287	0.437287	0.437287	0.437287	0.437287	0.437287	0.437287	0.437287	0.437287	0.437287	0.437287	0.437287	0.437287	0.437287	0.437287	0.437287	0.437287	0.437287	0.437287	0.437287	0.437287
50	clusters	0.350764	0.350764	0.350764	0.350764	0.350764	0.350764	0.350764	0.350764	0.350764	0.350764	0.350764	0.350764	0.350764	0.350764	0.350764	0.350764	0.350764	0.350764	0.350764	0.350764	0.350764	0.350764	0.350764	0.350764	0.350764	0.350764	0.350764	0.350764	0.350764	0.350764	0.350764	0.350764	0.350764	0.350764	0.350764	0.350764	0.350764	0.350764	0.350764	0.350764	0.350764	0.350764	0.350764	0.350764	0.350764	0.350764	0.350764	0.350764
51	fret	0.912395	0.834519	0.910774	1.04476	0.953212	0.763626	0.905902	0.921282	0.868087	0.850565	0.847183	0.985325	1.02215	0.957949	0.907528	0.9429	1.08688	0.922892	0.872238	0.993065	0.912395	1.02291	0.988425	1.02519	0.982219	0.996921	1.08396	0.988425	0.865592	0.9429	0.926913	0.929321	0.874724	0.957161	1.01987	0.902647	1.02291	0.833671	0.991519	0.968953	0.924502	0.93812	0.946873	0.924502	0.956372	0.910774	0.960313	0.88792
51	states	0.934925	0.934925	0.934925	0.934925	0.934925	0.934925	0.934925	0.934925	0.934925	0.934925	0.934925	0.934925	0.934925	0.934925	0.934925	0.934925	0.934925	0.934925	0.934925	0.934925	0.934925	0.934925	0.934925	0.934925	0.934925	0.934925	0.934925	0.934925	0.934925	0.934925	0.934925	0.934925	0.934925	0.934925	0.934925	0.934925	0.934925	0.934925	0.934925	0.934925	0.934925	0.934925	0.934925	0.934925	0.934925	0.934925	0.934925	0.934925
51	clusters	0.8725	0.8725	0.8725	0.8725	0.8725	0.8725	0.8725	0.8725	0.8725	0.8725	0.8725	0.8725	0.8725	0.8725	0.8725	0.8725	0.8725	0.8725	0.8725	0.8725	0.8725	0.8725	0.8725	0.8725	0.8725	0.8725	0.8725	0.8725	0.8725	0.8725	0.8725	0.8725	0.8725	0.8725	0.8725	0.8725	0.8725	0.8725	0.8725	0.8725	0.8725	0.8725	0.8725	0.8725	0.8725	0.8725	0.8725	0.8725
52	fret	0.667828	0.526466	0.702975	0.75758	0.610364	0.634452	0.763485	0.726014	0.912339	0.829702	0.929043	0.834609	0.705266	0.864325	0.917464	0.837068	0.871827	0.878101	0.812624	0.891976	0.80052	0.900859	0.810197	0.930334	0.843229	0.844463	0.861831	0.824807	0.890711	0.774162	0.823585	0.788493	0.864325	0.823585	0.85934	0.866822	0.957642	0.891976	0.899587	0.878101	0.878101	0.850648	0.861831	0.865573	0.905953	0.865573	0.925176	0.807773
52	states	0.70412	0.70412	0.70412	0.70412	0.70412	0.70412	0.70412	0.70412	0.861831	0.861831	0.861831	0.861831	0.70412	0.861831	0.861831	0.861831	0.861831	0.861831	0.861831	0.861831	0.861831	0.861831	0.861831	0.861831	0.861831	0.861831	0.861831	0.861831	0.861831	0.861831	0.861831	0.861831	0.861831	0.861831	0.861831	0.861831	0.861831	0.861831	0.861831	0.861831	0.861831	0.861831	0.861831	0.861831	0.861831	0.861831	0.861831	0.861831
52	clusters	0.561256	0.561256	0.561256	0.561256	0.561256	0.561256	0.561256	0.561256	0.8725	0.8725	0.8725	0.8725	0.561256	0.8725	0.8725	0.8725	0.8725	0.8725	0.8725	0.8725	0.8725	0.8725	0.8725	0.8725	0.8725	0.8725	0.8725	0.8725	0.8725	0.8725	0.8725	0.8725	0.8725	0.8725	0.8725	0.8725	0.8725	0.8725	0.8725	0.8725	0.8725	0.8725	0.8725	0.8725	0.8725	0.8725	0.8725	0.8725
53	fret	0.771145	0.842045	0.634025	0.962665	0.733962	0.838926	0.68336	0.708966	0.864142	1.09224	0.90645	0.883459	0.70492	0.842045	0.829626	0.849883	0.873756	0.726969	0.714455	1.0348	0.846741	0.918133	0.853035	0.851458	0.785822	0.799216	0.699485	1.04237	0.911441	0.728363	0.952226	0.771145	0.679371	0.891613	0.888344	0.760997	0.692733	0.69408	0.811272	0.714455	0.676721	0.748099	0.779926	0.936752	0.823471	0.857781	0.835817	0.755244
53	states	0.846741	0.846741	0.846741	0.846741	0.846741	0.846741	0.846741	0.846741	0.846741	0.846741	0.846741	0.846741	0.846741	0.846741	0.846741	0.846741	0.846741	0.846741	0.846741	0.846741	0.846741	0.846741	0.846741	0.846741	0.846741	0.846741	0.846741	0.846741	0.846741	0.846741	0.846741	0.846741	0.846741	0.846741	0.846741	0.846741	0.846741	0.846741	0.846741	0.846741	0.846741	0.846741	0.846741	0.846741	0.846741	0.846741	0.846741	0.846741
53	clusters	0.8725	0.8725	0.8725	0.8725	0.8725	0.8725	0.8725	0.8725	0.8725	0.8725	0.8725	0.8725	0.8725	0.8725	0.8725	0.8725	0.8725	0.8725	0.8725	0.8725	0.8725	0.8725	0.8725	0.8725	0.8725	0.8725	0.8725	0.8725	0.8725	0.8725	0.8725	0.8725	0.8725	0.8725	0.8725	0.8725	0.8725	0.8725	0.8725	0.8725	0.8725	0.8725	0.8725	0.8725	0.8725	0.8725	0.8725	0.8725
54	fret	0.321508	0.392822	0.599057	0.417454	0.46306	0.35461	0.591925	0.872528	0.804522	0.942405	1.07472	0.735225	0.959733	0.924049	0.93268	0.88858	0.9316	0.93484	0.941324	0.839492	0.867187	0.937	0.910051	0.877874	0.98691	0.906825	0.915431	1.02297	0.974937	0.944568	0.903601	0.852258	0.947814	0.861851	0.829936	0.921893	0.993452	0.910051	0.961903	0.841618	0.926206	0.966244	0.863985	0.897159
54	states	0.417454	0.417454	0.417454	0.417454	0.417454	0.417454	0.417454	0.921893	0.921893	0.921893	0.921893	0.921893	0.921893	0.921893	0.921893	0.921893	0.921893	0.921893	0.921893	0.921893	0.921893	0.921893	0.921893	0.921893	0.921893	0.921893	0.921893	0.921893	0.921893	0.921893	0.921893	0.921893	0.921893	0.921893	0.921893	0.921893	0.921893	0.921893	0.921893	0.921893	0.921893	0.921893	0.921893	0.921893
54	clusters	0.350764	0.350764	0.350764	0.350764	0.350764	0.350764	0.350764	0.8725	0.8725	0.8725	0.8725	0.8725	0.8725	0.8725	0.8725	0.8725	0.8725	0.8725	0.8725	0.8725	0.8725	0.8725	0.8725	0.8725	0.8725	0.8725	0.8725	0.8725	0.8725	0.8725	0.8725	0.8725	0.8725	0.8725	0.8725	0.8725	0.8725	0.8725	0.8725	0.8725	0.8725	0.8725	0.8725	0.8725
[truncated: 552 more columns]

## Sheet: 312-312_inter_liposome
1	fret	1	1.01007	1.12827	0.726282	0.693714	0.439327	0.201806	0.207223	0.678399	0.970281	1.00335	0.971913	0.911366	0.815855	0.824485	0.753123	0.847818	0.0767712	0.270026	0.131557	0.502556	0.973548	1.04768	0.963773	1.04768
1	states	0.971097	0.971097	0.971097	0.971097	0.270026	0.270026	0.270026	0.270026	0.270026	0.971097	0.971097	0.971097	0.971097	0.971097	0.971097	0.971097	0.971097	0.270026	0.270026	0.270026	0.270026	0.971097	0.971097	0.971097	0.971097
1	clusters	0.894008	0.894008	0.894008	0.894008	0.327982	0.327982	0.327982	0.327982	0.327982	0.894008	0.894008	0.894008	0.894008	0.894008	0.894008	0.894008	0.894008	0.327982	0.327982	0.327982	0.327982	0.894008	0.894008	0.894008	0.894008
2	fret	0.0622233	0.0277754	0.0327274	0.110132	0.17612	0.627711	0.644728	0.630307	0.969726	0.647376	0.752874	0.675676	0.662085	0.920582	0.775533	0.789398	0.758862	0.772479	0.627711	0.608488	0.631608	0.713448	0.71202	0.780132	0.733678	0.110764	0.00523341	-0.0118486	-0.00415076	0.0410793	-0.0401284	-0.00569913	0.0283235	-0.0118486	0.0570075	0.00681327	0.0587409	0.0547046	0.0305211	-0.00466737	-0.0430209	0.0354976	0.00892688	0.00575952	0.0036581	0.00575952	0.0169262	0.0332804
2	states	0.0185401	0.0185401	0.0185401	0.0185401	0.17612	0.722062	0.722062	0.722062	0.722062	0.722062	0.722062	0.722062	0.722062	0.722062	0.722062	0.722062	0.722062	0.722062	0.722062	0.722062	0.722062	0.722062	0.722062	0.722062	0.722062	0.0185401	0.0185401	0.0185401	0.0185401	0.0185401	0.0185401	0.0185401	0.0185401	0.0185401	0.0185401	0.0185401	0.0185401	0.0185401	0.0185401	0.0185401	0.0185401	0.0185401	0.0185401	0.0185401	0.0185401	0.0185401	0.0185401	0.0185401
2	clusters	0.100676	0.100676	0.100676	0.100676	0.100676	0.794605	0.794605	0.794605	0.794605	0.794605	0.794605	0.794605	0.794605	0.794605	0.794605	0.794605	0.794605	0.794605	0.794605	0.794605	0.794605	0.794605	0.794605	0.794605	0.794605	0.100676	0.100676	0.100676	0.100676	0.100676	0.100676	0.100676	0.100676	0.100676	0.100676	0.100676	0.100676	0.100676	0.100676	0.100676	0.100676	0.100676	0.100676	0.100676	0.100676	0.100676	0.100676	0.100676
3	fret	0.93013	0.826277	0.994461	0.923217	0.892661	1.0415	0.885991	0.812272	0.944094	0.884331	0.985292	0.812272	0.918062	0.901059	0.803043	0.815367	0.896012	0.783339	0.858119	0.879365	0.911227	0.93013	0.83099	0.87278	0.958244
3	states	0.892661	0.892661	0.892661	0.892661	0.892661	0.892661	0.892661	0.892661	0.892661	0.892661	0.892661	0.892661	0.892661	0.892661	0.892661	0.892661	0.892661	0.892661	0.892661	0.892661	0.892661	0.892661	0.892661	0.892661	0.892661
3	clusters	0.894008	0.894008	0.894008	0.894008	0.894008	0.894008	0.894008	0.894008	0.894008	0.894008	0.894008	0.894008	0.894008	0.894008	0.894008	0.894008	0.894008	0.894008	0.894008	0.894008	0.894008	0.894008	0.894008	0.894008	0.894008
4	fret	0.849693	1.04045	0.979316	0.893368	0.758733
4	states	0.893368	0.893368	0.893368	0.893368	0.893368
4	clusters	0.894008	0.894008	0.894008	0.894008	0.894008
5	fret	0.861011	0.79533	0.937403	0.983971	0.956535	0.894802	0.848867	0.878642	0.752538	0.741778	0.711759	0.828416	0.72364	1.1177	1.07549	0.922367	0.713235	0.74791	0.924234	0.755637	1	0.887585	0.835182	1.21002	1.01629	0.939299	1.05395	0.964296	0.766571	1.19285	0.633015	0.766571	1.14993	0.861011	1.08643	0.772881	1.10419	1.11318	0.61054	0.857525	0.821701	0.880424	0.826733	0.815035	1.51393	0.811721	0.873317	1.07767
5	states	0.856656	0.856656	0.856656	0.856656	0.856656	0.856656	0.856656	0.856656	0.856656	0.856656	0.856656	0.856656	0.856656	0.856656	0.856656	0.856656	0.856656	0.856656	0.856656	0.856656	0.856656	0.856656	0.856656	0.856656	0.856656	0.856656	0.856656	0.856656	0.856656	0.856656	0.856656	0.856656	0.856656	0.856656	0.856656	0.856656	0.856656	0.856656	0.856656	0.856656	0.856656	0.856656	0.856656	0.856656	0.856656	0.856656	0.856656	0.856656
5	clusters	0.894008	0.894008	0.894008	0.894008	0.894008	0.894008	0.894008	0.894008	0.894008	0.894008	0.894008	0.894008	0.894008	0.894008	0.894008	0.894008	0.894008	0.894008	0.894008	0.894008	0.894008	0.894008	0.894008	0.894008	0.894008	0.894008	0.894008	0.894008	0.894008	0.894008	0.894008	0.894008	0.894008	0.894008	0.894008	0.894008	0.894008	0.894008	0.894008	0.894008	0.894008	0.894008	0.894008	0.894008	0.894008	0.894008	0.894008	0.894008
6	fret	0.958699	0.858126	0.850009	0.79388	0.781425	0.825808	0.792747	0.848852	0.721227	0.700367	0.807516	1.04069	0.764576	0.928726	0.844227	0.875602	0.919205	0.806377	0.914456	0.956288	0.835001	0.851167	0.928726	0.923961	0.779187	0.887317	0.766818	0.937085	0.903804	0.910901	0.773558	0.837305	0.796148	0.88497	0.984134	0.886143	0.915643	0.823514	0.829252	0.881453	0.802963	0.873265	0.782553	0.915643	0.939478	0.816646	0.780297	0.859287
6	states	0.851747	0.851747	0.851747	0.851747	0.851747	0.851747	0.851747	0.851747	0.851747	0.851747	0.851747	0.851747	0.851747	0.851747	0.851747	0.851747	0.851747	0.851747	0.851747	0.851747	0.851747	0.851747	0.851747	0.851747	0.851747	0.851747	0.851747	0.851747	0.851747	0.851747	0.851747	0.851747	0.851747	0.851747	0.851747	0.851747	0.851747	0.851747	0.851747	0.851747	0.851747	0.851747	0.851747	0.851747	0.851747	0.851747	0.851747	0.851747
6	clusters	0.894008	0.894008	0.894008	0.894008	0.894008	0.894008	0.894008	0.894008	0.894008	0.894008	0.894008	0.894008	0.894008	0.894008	0.894008	0.894008	0.894008	0.894008	0.894008	0.894008	0.894008	0.894008	0.894008	0.894008	0.894008	0.894008	0.894008	0.894008	0.894008	0.894008	0.894008	0.894008	0.894008	0.894008	0.894008	0.894008	0.894008	0.894008	0.894008	0.894008	0.894008	0.894008	0.894008	0.894008	0.894008	0.894008	0.894008	0.894008
7	fret	0.757374	0.76956	0.65689	0.709883	0.685598	0.734701	0.631314	0.801295	0.697036	0.694484	0.815365	0.640987	0.777755	0.703441	0.998356	0.797106	0.921864	0.876346	0.828173	0.694484	0.689398	0.754683	0.84692	0.808309	1.02324	0.81395	0.616964	0.811126	0.826743	0.745315	0.654428	0.711176	0.844017	0.770922	0.768199	0.828173	0.790158	0.745315	0.633724	0.680552	0.578426	0.822463	0.928063	0.690667	0.671775	0.809717	0.871886	0.802694
7	states	0.826743	0.826743	0.826743	0.826743	0.826743	0.826743	0.826743	0.826743	0.826743	0.826743	0.826743	0.826743	0.826743	0.826743	0.826743	0.826743	0.826743	0.826743	0.826743	0.826743	0.826743	0.826743	0.826743	0.826743	0.826743	0.826743	0.826743	0.826743	0.826743	0.826743	0.826743	0.826743	0.826743	0.826743	0.826743	0.826743	0.826743	0.826743	0.826743	0.826743	0.826743	0.826743	0.826743	0.826743	0.826743	0.826743	0.826743	0.826743
7	clusters	0.794605	0.794605	0.794605	0.794605	0.794605	0.794605	0.794605	0.794605	0.794605	0.794605	0.794605	0.794605	0.794605	0.794605	0.794605	0.794605	0.794605	0.794605	0.794605	0.794605	0.794605	0.794605	0.794605	0.794605	0.794605	0.794605	0.794605	0.794605	0.794605	0.794605	0.794605	0.794605	0.794605	0.794605	0.794605	0.794605	0.794605	0.794605	0.794605	0.794605	0.794605	0.794605	0.794605	0.794605	0.794605	0.794605	0.794605	0.794605
8	fret	0.767189	0.809681	0.813492	0.744206	0.744206	0.817322	1.16921	0.91538	0.652784	0.807783	0.950923	0.881325	0.608484	0.695424	0.69218	0.953196	0.725309	0.765395	0.785369
8	states	0.785369	0.785369	0.785369	0.785369	0.785369	0.785369	0.785369	0.785369	0.785369	0.785369	0.785369	0.785369	0.785369	0.785369	0.785369	0.785369	0.785369	0.785369	0.785369
8	clusters	0.794605	0.794605	0.794605	0.794605	0.794605	0.794605	0.794605	0.794605	0.794605	0.794605	0.794605	0.794605	0.794605	0.794605	0.794605	0.794605	0.794605	0.794605	0.794605
9	fret	0.791355	0.662066	0.531295	1.07149	0.914591	1.0142	1.11374	1.02882	0.670467	0.923922	0.587606	0.81104	0.783281	0.944779	1.0205	0.968062	1.13901	0.57377	0.99595	1.3599	0.7721	0.905351	0.819373	0.929565	0.83117	0.952478	0.903514	1.85527	1.32359	1.09574	0.846568	0.935242	1.20619	0.75016	0.747071	0.832868	1.07367	0.946698	1.06497	2.02786	0.82441	0.946698	0.640076	1.46672	0.962188	0.987901	0.718266	0.914591
9	states	0.929565	0.929565	0.929565	0.929565	0.929565	0.929565	0.929565	0.929565	0.929565	0.929565	0.929565	0.929565	0.929565	0.929565	0.929565	0.929565	0.929565	0.929565	0.929565	0.929565	0.929565	0.929565	0.929565	0.929565	0.929565	0.929565	0.929565	0.929565	0.929565	0.929565	0.929565	0.929565	0.929565	0.929565	0.929565	0.929565	0.929565	0.929565	0.929565	0.929565	0.929565	0.929565	0.929565	0.929565	0.929565	0.929565	0.929565	0.929565
9	clusters	0.894008	0.894008	0.894008	0.894008	0.894008	0.894008	0.894008	0.894008	0.894008	0.894008	0.894008	0.894008	0.894008	0.894008	0.894008	0.894008	0.894008	0.894008	0.894008	0.894008	0.894008	0.894008	0.894008	0.894008	0.894008	0.894008	0.894008	0.894008	0.894008	0.894008	0.894008	0.894008	0.894008	0.894008	0.894008	0.894008	0.894008	0.894008	0.894008	0.894008	0.894008	0.894008	0.894008	0.894008	0.894008	0.894008	0.894008	0.894008
10	fret	0.892865	0.876591	1.00324	0.785944	0.996766	0.960142	0.919958	0.966437	0.926058	1.01302	1.05285	0.87219	0.844669	0.906339	0.69028	0.830428	1.12378	0.958573	0.953877	0.812159	0.912373	0.952316	0.894355	0.949198	0.788677	0.875122	0.900332	0.5973
10	states	0.909356	0.909356	0.909356	0.909356	0.909356	0.909356	0.909356	0.909356	0.909356	0.909356	0.909356	0.909356	0.909356	0.909356	0.909356	0.909356	0.909356	0.909356	0.909356	0.909356	0.909356	0.909356	0.909356	0.909356	0.909356	0.909356	0.909356	0.909356
10	clusters	0.894008	0.894008	0.894008	0.894008	0.894008	0.894008	0.894008	0.894008	0.894008	0.894008	0.894008	0.894008	0.894008	0.894008	0.894008	0.894008	0.894008	0.894008	0.894008	0.894008	0.894008	0.894008	0.894008	0.894008	0.894008	0.894008	0.894008	0.894008
11	fret	0.0486716	0.0477036	0.0395701	0.053057	0.0472205	0.0604746	0.0362692	0.0589801	0.0614741	0.0306748	0.0443342	0.0448138	0.0288278	0.0376805	0.0545296	0.0629779	0.0302122	0.0405183	0.0443342	0.0215267	0.0565015	0.0835784	0.0525673
11	states	0.0472205	0.0472205	0.0472205	0.0472205	0.0472205	0.0472205	0.0472205	0.0472205	0.0472205	0.0472205	0.0472205	0.0472205	0.0472205	0.0472205	0.0472205	0.0472205	0.0472205	0.0472205	0.0472205	0.0472205	0.0472205	0.0472205	0.0472205
11	clusters	0.100676	0.100676	0.100676	0.100676	0.100676	0.100676	0.100676	0.100676	0.100676	0.100676	0.100676	0.100676	0.100676	0.100676	0.100676	0.100676	0.100676	0.100676	0.100676	0.100676	0.100676	0.100676	0.100676
12	fret	0.287505	0.359974	0.322314	0.351615	0.306137	0.322314	0.36464	0.346073	0.369323	0.306137	0.291033	0.367448	0.35069	0.316006	0.22731	0.624645	0.424897	0.476742	0.477759	0.362771	0.328676	0.441634	0.346073	0.319613	0.33872	0.447592	0.427836	0.426855	0.389177	0.306137	0.425876	0.335973	0.328676	0.286625	0.509684	0.374023	0.304351	0.26481	0.468651	0.395862	0.408366	0.381578	0.373082	0.4103	0.363705	0.415148	0.352542	0.357182
12	states	0.372141	0.372141	0.372141	0.372141	0.372141	0.372141	0.372141	0.372141	0.372141	0.372141	0.372141	0.372141	0.372141	0.372141	0.372141	0.372141	0.372141	0.372141	0.372141	0.372141	0.372141	0.372141	0.372141	0.372141	0.372141	0.372141	0.372141	0.372141	0.372141	0.372141	0.372141	0.372141	0.372141	0.372141	0.372141	0.372141	0.372141	0.372141	0.372141	0.372141	0.372141	0.372141	0.372141	0.372141	0.372141	0.372141	0.372141	0.372141
12	clusters	0.327982	0.327982	0.327982	0.327982	0.327982	0.327982	0.327982	0.327982	0.327982	0.327982	0.327982	0.327982	0.327982	0.327982	0.327982	0.327982	0.327982	0.327982	0.327982	0.327982	0.327982	0.327982	0.327982	0.327982	0.327982	0.327982	0.327982	0.327982	0.327982	0.327982	0.327982	0.327982	0.327982	0.327982	0.327982	0.327982	0.327982	0.327982	0.327982	0.327982	0.327982	0.327982	0.327982	0.327982	0.327982	0.327982	0.327982	0.327982
13	fret	0.84752	0.72794	0.941803	0.92636	0.868842	0.868842	0.877878	0.939859	0.868842	0.870642	0.991759	0.823273	0.899936	0.971461	0.788113	0.892524	0.865253	0.93405	0.760664	0.849278	1.03571	0.768646	0.686162	0.874253	0.778325	0.799676	0.983588	0.887004	0.762255	0.854571	0.894372	0.861678	1.01669	0.831856	1.00831	0.833583	0.775086	0.887004	1.00612	0.883342	0.740257
13	states	0.868842	0.868842	0.868842	0.868842	0.868842	0.868842	0.868842	0.868842	0.868842	0.868842	0.868842	0.868842	0.868842	0.868842	0.868842	0.868842	0.868842	0.868842	0.868842	0.868842	0.868842	0.868842	0.868842	0.868842	0.868842	0.868842	0.868842	0.868842	0.868842	0.868842	0.868842	0.868842	0.868842	0.868842	0.868842	0.868842	0.868842	0.868842	0.868842	0.868842	0.868842
13	clusters	0.894008	0.894008	0.894008	0.894008	0.894008	0.894008	0.894008	0.894008	0.894008	0.894008	0.894008	0.894008	0.894008	0.894008	0.894008	0.894008	0.894008	0.894008	0.894008	0.894008	0.894008	0.894008	0.894008	0.894008	0.894008	0.894008	0.894008	0.894008	0.894008	0.894008	0.894008	0.894008	0.894008	0.894008	0.894008	0.894008	0.894008	0.894008	0.894008	0.894008	0.894008
14	fret	0.760289	0.820557	0.944537
14	states	0.820557	0.820557	0.820557
14	clusters	0.794605	0.794605	0.794605
15	fret	0.585554	0.780945	0.780945	0.997945	0.993849	1.0144	0.638274	0.574172	0.815648	0.708021	0.690378	0.694754	0.800606	0.73521	0.800606	0.841302	1.05065	0.628788	0.785819	1.0144	0.839569	0.764896	0.969627	0.837839	1.06593	0.887586	0.855293	0.82072	0.805591	0.461438	0.805591	0.876693	1.18222	0.531471	0.52788	0.979645	1.31539	0.709508	0.6802	0.612787	0.616757	0.639639	0.658992	0.928663	0.663201	0.677391	0.753838	0.873091
15	states	0.817335	0.817335	0.817335	0.817335	0.817335	0.817335	0.817335	0.817335	0.817335	0.817335	0.817335	0.817335	0.817335	0.817335	0.817335	0.817335	0.817335	0.817335	0.817335	0.817335	0.817335	0.817335	0.817335	0.817335	0.817335	0.817335	0.817335	0.817335	0.817335	0.817335	0.817335	0.817335	0.817335	0.817335	0.817335	0.817335	0.817335	0.817335	0.817335	0.817335	0.817335	0.817335	0.817335	0.817335	0.817335	0.817335	0.817335	0.817335
15	clusters	0.794605	0.794605	0.794605	0.794605	0.794605	0.794605	0.794605	0.794605	0.794605	0.794605	0.794605	0.794605	0.794605	0.794605	0.794605	0.794605	0.794605	0.794605	0.794605	0.794605	0.794605	0.794605	0.794605	0.794605	0.794605	0.794605	0.794605	0.794605	0.794605	0.794605	0.794605	0.794605	0.794605	0.794605	0.794605	0.794605	0.794605	0.794605	0.794605	0.794605	0.794605	0.794605	0.794605	0.794605	0.794605	0.794605	0.794605	0.794605
16	fret	0.86752	0.903116	0.845781	0.732039	1.10291	0.993524	0.969524	0.767892	0.894121	0.888161	0.930493	0.877797	1.06147	0.868983	0.941302	0.945963	0.897113	0.868983	0.850098	0.817383	0.745217	1	0.847218	0.541325	0.850098	0.758502	0.868983	0.936658	0.831499	0.854431	0.919776	0.977474	0.932032	1.06147	0.871914	0.925889	0.88075	0.956904	0.844345	0.358852	0.0607489	0.0417225	0.0925325	0.00432462	0.0269377	0.0741287	0.408019	0.81458
16	states	0.888161	0.888161	0.888161	0.888161	0.888161	0.888161	0.888161	0.888161	0.888161	0.888161	0.888161	0.888161	0.888161	0.888161	0.888161	0.888161	0.888161	0.888161	0.888161	0.888161	0.888161	0.888161	0.888161	0.109046	0.888161	0.888161	0.888161	0.888161	0.888161	0.888161	0.888161	0.888161	0.888161	0.888161	0.888161	0.888161	0.888161	0.888161	0.888161	0.109046	0.109046	0.109046	0.109046	0.109046	0.109046	0.109046	0.109046	0.888161
16	clusters	0.894008	0.894008	0.894008	0.894008	0.894008	0.894008	0.894008	0.894008	0.894008	0.894008	0.894008	0.894008	0.894008	0.894008	0.894008	0.894008	0.894008	0.894008	0.894008	0.894008	0.894008	0.894008	0.894008	0.100676	0.894008	0.894008	0.894008	0.894008	0.894008	0.894008	0.894008	0.894008	0.894008	0.894008	0.894008	0.894008	0.894008	0.894008	0.894008	0.100676	0.100676	0.100676	0.100676	0.100676	0.100676	0.100676	0.100676	0.894008
17	fret	0.778104	1.07104	0.793194	0.794715	0.799295	1.14479	0.857593	1.00372	0.851124	0.956285	0.924641	0.800827	0.857593	0.885555	0.940344	0.956285	0.924641	0.835132	0.892247	0.758832	0.904064	0.882225	0.744265	0.942103	0.830383	0.864103	0.808519	0.924641	0.872301	0.952722	1.013	0.904064	0.869014	0.887224	0.873948	0.745712	0.73277	0.724239	0.772133	0.8463	0.880564	0.851124	0.887224	0.78562	0.82723	0.8463	0.830383	0.936834
17	states	0.869014	0.869014	0.869014	0.869014	0.869014	0.869014	0.869014	0.869014	0.869014	0.869014	0.869014	0.869014	0.869014	0.869014	0.869014	0.869014	0.869014	0.869014	0.869014	0.869014	0.869014	0.869014	0.869014	0.869014	0.869014	0.869014	0.869014	0.869014	0.869014	0.869014	0.869014	0.869014	0.869014	0.869014	0.869014	0.869014	0.869014	0.869014	0.869014	0.869014	0.869014	0.869014	0.869014	0.869014	0.869014	0.869014	0.869014	0.869014
17	clusters	0.894008	0.894008	0.894008	0.894008	0.894008	0.894008	0.894008	0.894008	0.894008	0.894008	0.894008	0.894008	0.894008	0.894008	0.894008	0.894008	0.894008	0.894008	0.894008	0.894008	0.894008	0.894008	0.894008	0.894008	0.894008	0.894008	0.894008	0.894008	0.894008	0.894008	0.894008	0.894008	0.894008	0.894008	0.894008	0.894008	0.894008	0.894008	0.894008	0.894008	0.894008	0.894008	0.894008	0.894008	0.894008	0.894008	0.894008	0.894008
18	fret	0.924337	0.921601	0.913422	0.849447	0.917506	0.859933	0.785458	0.922969	0.953346	0.988568	0.912062	0.909347	0.836438	0.916144	0.858618
18	states	0.913422	0.913422	0.913422	0.913422	0.913422	0.913422	0.913422	0.913422	0.913422	0.913422	0.913422	0.913422	0.913422	0.913422	0.913422
18	clusters	0.894008	0.894008	0.894008	0.894008	0.894008	0.894008	0.894008	0.894008	0.894008	0.894008	0.894008	0.894008	0.894008	0.894008	0.894008
19	fret	0.87189	0.844601	0.932384	0.918088	0.852733	1.035	0.945371	0.856816	0.961402	0.882954	0.833831	1.09305	0.980575	0.957012	0.859545	0.778606	0.88018	0.710704	0.74172	0.863649	1.02574	0.637908	0.499334	0.447322	0.459363	0.43145	0.508745	0.533121
19	states	0.876035	0.876035	0.876035	0.876035	0.876035	0.876035	0.876035	0.876035	0.876035	0.876035	0.876035	0.876035	0.876035	0.876035	0.876035	0.876035	0.876035	0.876035	0.876035	0.876035	0.876035	0.876035	0.479349	0.479349	0.479349	0.479349	0.479349	0.479349
19	clusters	0.894008	0.894008	0.894008	0.894008	0.894008	0.894008	0.894008	0.894008	0.894008	0.894008	0.894008	0.894008	0.894008	0.894008	0.894008	0.894008	0.894008	0.894008	0.894008	0.894008	0.894008	0.894008	0.556189	0.556189	0.556189	0.556189	0.556189	0.556189
20	fret	0.83499	0.850273	0.844134	0.883082
20	states	0.847203	0.847203	0.847203	0.847203
20	clusters	0.894008	0.894008	0.894008	0.894008
21	fret	0.668192	1.07317	0.921738	0.668192	0.830865	0.782737	0.578988	0.909021	0.47125
21	states	0.782737	0.782737	0.782737	0.782737	0.782737	0.782737	0.782737	0.782737	0.782737
21	clusters	0.794605	0.794605	0.794605	0.794605	0.794605	0.794605	0.794605	0.794605	0.794605
22	fret	0.994589	0.838926	1.08443	0.758116	0.584759	0.803721	0.630238	0.546026	0.453446	0.821938	0.881836	0.699485	0.775526	0.83117	0.724185	0.726969	0.711707
22	states	0.758116	0.758116	0.758116	0.758116	0.758116	0.758116	0.758116	0.758116	0.758116	0.758116	0.758116	0.758116	0.758116	0.758116	0.758116	0.758116	0.758116
22	clusters	0.794605	0.794605	0.794605	0.794605	0.794605	0.794605	0.794605	0.794605	0.794605	0.794605	0.794605	0.794605	0.794605	0.794605	0.794605	0.794605	0.794605
23	fret	0.933131	0.831107	0.867784	0.689018	0.868938	0.855123	0.775854	0.882821	0.85742	1.02059	0.842517	0.484807	0.783665	0.896772	0.890951	0.852827	1.01939	1.03892	0.730448	0.890951	0.607991	1.16779	0.833385	0.808423	0.829968	0.934311	0.79153	1.11833	0.973545	0.916654	1.02183	0.833385	0.851679	0.739249	0.6901	1.08457	1.19348
23	states	0.85742	0.85742	0.85742	0.85742	0.85742	0.85742	0.85742	0.85742	0.85742	0.85742	0.85742	0.85742	0.85742	0.85742	0.85742	0.85742	0.85742	0.85742	0.85742	0.85742	0.85742	0.85742	0.85742	0.85742	0.85742	0.85742	0.85742	0.85742	0.85742	0.85742	0.85742	0.85742	0.85742	0.85742	0.85742	0.85742	0.85742
23	clusters	0.894008	0.894008	0.894008	0.894008	0.894008	0.894008	0.894008	0.894008	0.894008	0.894008	0.894008	0.894008	0.894008	0.894008	0.894008	0.894008	0.894008	0.894008	0.894008	0.894008	0.894008	0.894008	0.894008	0.894008	0.894008	0.894008	0.894008	0.894008	0.894008	0.894008	0.894008	0.894008	0.894008	0.894008	0.894008	0.894008	0.894008
24	fret	0.418593	0.198718	0.294943	0.275924	0.211227	0.434843	0.24939	0.202481	0.229816
24	states	0.24939	0.24939	0.24939	0.24939	0.24939	0.24939	0.24939	0.24939	0.24939
24	clusters	0.327982	0.327982	0.327982	0.327982	0.327982	0.327982	0.327982	0.327982	0.327982
25	fret	0.628469	0.475691	0.594983	0.586196	0.627156	0.588697	0.682765	0.572579	0.675785	0.667483	0.727348	0.581218	0.537714	0.531862	0.513464	0.692577	0.87271	0.671624	0.675785	0.780553	0.507791	0.561607	0.789998	0.640384	0.529534	0.755837	0.739232	0.695417	0.937066	0.625845	0.709818	0.810805	0.718539	0.660626	0.968992	0.965183	1.07764	0.852182	0.715623	0.870982	0.712716	0.870982	0.772756	0.801143	0.797945	0.643055	0.739232	0.87271
25	states	0.775867	0.775867	0.775867	0.775867	0.775867	0.775867	0.775867	0.775867	0.775867	0.775867	0.775867	0.775867	0.775867	0.775867	0.775867	0.775867	0.775867	0.775867	0.775867	0.775867	0.775867	0.775867	0.775867	0.775867	0.775867	0.775867	0.775867	0.775867	0.775867	0.775867	0.775867	0.775867	0.775867	0.775867	0.775867	0.775867	0.775867	0.775867	0.775867	0.775867	0.775867	0.775867	0.775867	0.775867	0.775867	0.775867	0.775867	0.775867
25	clusters	0.794605	0.794605	0.794605	0.794605	0.794605	0.794605	0.794605	0.794605	0.794605	0.794605	0.794605	0.794605	0.794605	0.794605	0.794605	0.794605	0.794605	0.794605	0.794605	0.794605	0.794605	0.794605	0.794605	0.794605	0.794605	0.794605	0.794605	0.794605	0.794605	0.794605	0.794605	0.794605	0.794605	0.794605	0.794605	0.794605	0.794605	0.794605	0.794605	0.794605	0.794605	0.794605	0.794605	0.794605	0.794605	0.794605	0.794605	0.794605
26	fret	0.9871	0.893212	0.869934	0.932535	0.931469	0.967793	0.847786	0.971007	0.972079	0.791155	0.927208	1.01184	0.902757	0.913377	0.96351	0.901695	0.867822	0.838316	0.996773	1.02695	0.954952	0.952814	0.936799	1.01399	0.821511	0.895332	1.03452	0.864654	0.991397	0.897452	1.02371	0.954952	0.952814	0.976368	0.964581	0.88368	0.87099	1.00753	0.994622	0.965652	0.900634	0.903818	0.988174	0.96244	0.919757	0.910189	0.949608	0.882621
26	states	0.933601	0.933601	0.933601	0.933601	0.933601	0.933601	0.933601	0.933601	0.933601	0.933601	0.933601	0.933601	0.933601	0.933601	0.933601	0.933601	0.933601	0.933601	0.933601	0.933601	0.933601	0.933601	0.933601	0.933601	0.933601	0.933601	0.933601	0.933601	0.933601	0.933601	0.933601	0.933601	0.933601	0.933601	0.933601	0.933601	0.933601	0.933601	0.933601	0.933601	0.933601	0.933601	0.933601	0.933601	0.933601	0.933601	0.933601	0.933601
26	clusters	0.894008	0.894008	0.894008	0.894008	0.894008	0.894008	0.894008	0.894008	0.894008	0.894008	0.894008	0.894008	0.894008	0.894008	0.894008	0.894008	0.894008	0.894008	0.894008	0.894008	0.894008	0.894008	0.894008	0.894008	0.894008	0.894008	0.894008	0.894008	0.894008	0.894008	0.894008	0.894008	0.894008	0.894008	0.894008	0.894008	0.894008	0.894008	0.894008	0.894008	0.894008	0.894008	0.894008	0.894008	0.894008	0.894008	0.894008	0.894008
27	fret	0.674543	0.546087	0.703455	0.746023	0.623257	0.535002	0.666313	0.541048	0.61203	0.546087	0.476852	0.673513
27	states	0.617643	0.617643	0.617643	0.617643	0.617643	0.617643	0.617643	0.617643	0.617643	0.617643	0.617643	0.617643
27	clusters	0.556189	0.556189	0.556189	0.556189	0.556189	0.556189	0.556189	0.556189	0.556189	0.556189	0.556189	0.556189
28	fret	0.787103	0.919193	0.917917	0.829327	0.926871	0.794276	1.04846	1.01871	0.956583	0.896337	0.920471	0.952682	1.03759	0.947493	0.950086	0.865027	0.887519	0.914091	0.800274	0.876241	0.779957	0.901393	0.80629	0.978832	0.911545	0.84402	0.891293	0.935867	0.75868	0.753984	0.877491	0.919193	0.888777	0.817168	0.877491	0.858825	0.727205	0.941026	0.934579	0.877491	0.778769	0.831768	0.909002	0.717979	0.857587	0.789491	0.879993	0.77163
28	states	0.863785	0.863785	0.863785	0.863785	0.863785	0.863785	0.863785	0.863785	0.863785	0.863785	0.863785	0.863785	0.863785	0.863785	0.863785	0.863785	0.863785	0.863785	0.863785	0.863785	0.863785	0.863785	0.863785	0.863785	0.863785	0.863785	0.863785	0.863785	0.863785	0.863785	0.863785	0.863785	0.863785	0.863785	0.863785	0.863785	0.863785	0.863785	0.863785	0.863785	0.863785	0.863785	0.863785	0.863785	0.863785	0.863785	0.863785	0.863785
28	clusters	0.894008	0.894008	0.894008	0.894008	0.894008	0.894008	0.894008	0.894008	0.894008	0.894008	0.894008	0.894008	0.894008	0.894008	0.894008	0.894008	0.894008	0.894008	0.894008	0.894008	0.894008	0.894008	0.894008	0.894008	0.894008	0.894008	0.894008	0.894008	0.894008	0.894008	0.894008	0.894008	0.894008	0.894008	0.894008	0.894008	0.894008	0.894008	0.894008	0.894008	0.894008	0.894008	0.894008	0.894008	0.894008	0.894008	0.894008	0.894008
29	fret	0.858343	0.775595	0.77689	0.811018	0.844655	0.855595	0.828407	0.819016	0.87634	0.859719	0.78469	0.820354	0.846018	0.812348	0.828407	0.805711	0.801745	0.891751	0.850114	0.859719	0.886128	0.87634	0.823033	0.819016	0.893161	0.859719	0.835154	0.791224	0.950717	0.752484	0.824374	0.869391	0.886128	0.839218	0.888937	0.883324	0.910184	0.762706	0.850114	0.81768	0.779485	0.855595	0.900229	0.847382	0.894572	0.803066	0.820354	0.804388
29	states	0.847382	0.847382	0.847382	0.847382	0.847382	0.847382	0.847382	0.847382	0.847382	0.847382	0.847382	0.847382	0.847382	0.847382	0.847382	0.847382	0.847382	0.847382	0.847382	0.847382	0.847382	0.847382	0.847382	0.847382	0.847382	0.847382	0.847382	0.847382	0.847382	0.847382	0.847382	0.847382	0.847382	0.847382	0.847382	0.847382	0.847382	0.847382	0.847382	0.847382	0.847382	0.847382	0.847382	0.847382	0.847382	0.847382	0.847382	0.847382
29	clusters	0.894008	0.894008	0.894008	0.894008	0.894008	0.894008	0.894008	0.894008	0.894008	0.894008	0.894008	0.894008	0.894008	0.894008	0.894008	0.894008	0.894008	0.894008	0.894008	0.894008	0.894008	0.894008	0.894008	0.894008	0.894008	0.894008	0.894008	0.894008	0.894008	0.894008	0.894008	0.894008	0.894008	0.894008	0.894008	0.894008	0.894008	0.894008	0.894008	0.894008	0.894008	0.894008	0.894008	0.894008	0.894008	0.894008	0.894008	0.894008
30	fret	0.518596	0.230071	0.198954	0.378233	0.265194	0.348621	0.328928	0.370328	0.558772	0.628461	0.599114	0.27106	0.552735	0.544694	0.36539	0.387134	0.42381	0.518596	0.377245	0.19313	0.28672	0.244691	0.180524	0.305348	0.157294	0.270083	0.204781	0.232993	0.269105	0.135082	0.201867	0.33188	0.249569	0.413884	0.428776	0.415868	0.645705	0.470592	0.451654	0.57086	0.467599	0.499567	0.560785	0.639615	0.779571	0.432751	0.603157	0.583968
30	states	0.518596	0.269105	0.269105	0.269105	0.269105	0.269105	0.269105	0.269105	0.518596	0.518596	0.518596	0.269105	0.518596	0.518596	0.518596	0.518596	0.518596	0.518596	0.269105	0.269105	0.269105	0.269105	0.269105	0.269105	0.269105	0.269105	0.269105	0.269105	0.269105	0.269105	0.269105	0.269105	0.269105	0.518596	0.518596	0.518596	0.518596	0.518596	0.518596	0.518596	0.518596	0.518596	0.518596	0.518596	0.518596	0.518596	0.518596	0.518596
30	clusters	0.556189	0.327982	0.327982	0.327982	0.327982	0.327982	0.327982	0.327982	0.556189	0.556189	0.556189	0.327982	0.556189	0.556189	0.556189	0.556189	0.556189	0.556189	0.327982	0.327982	0.327982	0.327982	0.327982	0.327982	0.327982	0.327982	0.327982	0.327982	0.327982	0.327982	0.327982	0.327982	0.327982	0.556189	0.556189	0.556189	0.556189	0.556189	0.556189	0.556189	0.556189	0.556189	0.556189	0.556189	0.556189	0.556189	0.556189	0.556189
31	fret	0.507195	0.472692	0.502651	0.495887	0.512913	0.493647	0.47378	0.426379	0.475961	0.455503	0.191924
31	states	0.475961	0.475961	0.475961	0.475961	0.475961	0.475961	0.475961	0.475961	0.475961	0.475961	0.475961
31	clusters	0.556189	0.556189	0.556189	0.556189	0.556189	0.556189	0.556189	0.556189	0.556189	0.556189	0.556189
32	fret	0.823908	0.835195	0.812725	0.869685	0.833778	0.838033	0.909658	0.899172	0.926312	0.930892	0.894705	0.929364	0.899172	0.881397	0.855198	0.900665	0.835195	0.796139	0.763635	0.798888	0.823908	0.982376	0.930892	0.866774	0.868229	0.82672	0.938562	0.759633	0.785207	0.890253	0.882869	0.858082	0.947826	0.818304	0.893219	0.811334	0.85232	0.82672	0.874064	0.885818	0.926312	0.882869	0.856639	0.858082	0.825314	0.972862	0.944731	0.845156
32	states	0.840877	0.840877	0.840877	0.840877	0.840877	0.840877	0.840877	0.840877	0.840877	0.840877	0.840877	0.840877	0.840877	0.840877	0.840877	0.840877	0.840877	0.840877	0.840877	0.840877	0.840877	0.840877	0.840877	0.840877	0.840877	0.840877	0.840877	0.840877	0.840877	0.840877	0.840877	0.840877	0.840877	0.840877	0.840877	0.840877	0.840877	0.840877	0.840877	0.840877	0.840877	0.840877	0.840877	0.840877	0.840877	0.840877	0.840877	0.840877
32	clusters	0.794605	0.794605	0.794605	0.794605	0.794605	0.794605	0.794605	0.794605	0.794605	0.794605	0.794605	0.794605	0.794605	0.794605	0.794605	0.794605	0.794605	0.794605	0.794605	0.794605	0.794605	0.794605	0.794605	0.794605	0.794605	0.794605	0.794605	0.794605	0.794605	0.794605	0.794605	0.794605	0.794605	0.794605	0.794605	0.794605	0.794605	0.794605	0.794605	0.794605	0.794605	0.794605	0.794605	0.794605	0.794605	0.794605	0.794605	0.794605
33	fret	0.641272	0.651007	0.609991	0.651007	0.649061	0.713826	0.666542	0.680096	0.672356	0.827712	0.748264	0.635422	0.68879	0.650034	0.672356	0.647115	0.624678	0.563687	0.759692	0.580485	0.648088	0.679129	0.649061	0.668481	0.732985	0.73872	0.816435	0.635422	0.613912	0.607048	0.625656	0.766346	0.769195	0.625656	0.660722	0.668481	0.668481	0.673324	0.671387	0.69072	0.733941	0.670419	0.664603	0.684928	0.791927	0.651979	0.585415	0.64322
33	states	0.666542	0.666542	0.666542	0.666542	0.666542	0.666542	0.666542	0.666542	0.666542	0.766821	0.766821	0.666542	0.666542	0.666542	0.666542	0.666542	0.666542	0.666542	0.766821	0.666542	0.666542	0.666542	0.666542	0.666542	0.766821	0.766821	0.766821	0.666542	0.666542	0.666542	0.666542	0.766821	0.766821	0.666542	0.666542	0.666542	0.666542	0.666542	0.666542	0.666542	0.666542	0.666542	0.666542	0.666542	0.766821	0.666542	0.666542	0.666542
33	clusters	0.556189	0.556189	0.556189	0.556189	0.556189	0.556189	0.556189	0.556189	0.556189	0.794605	0.794605	0.556189	0.556189	0.556189	0.556189	0.556189	0.556189	0.556189	0.794605	0.556189	0.556189	0.556189	0.556189	0.556189	0.794605	0.794605	0.794605	0.556189	0.556189	0.556189	0.556189	0.794605	0.794605	0.556189	0.556189	0.556189	0.556189	0.556189	0.556189	0.556189	0.556189	0.556189	0.556189	0.556189	0.794605	0.556189	0.556189	0.556189
34	fret	0.875346	0.866152	0.837362	0.814654	0.749969	0.812932	0.818109	0.792534	0.753167	0.839133	0.779204	0.840909	0.828557	0.851638	0.82506	0.844471	0.864324	0.799279	0.866152	0.894025	0.924747	0.704957	0.857053	0.729482	0.828557	0.875346	0.864324	0.837362	0.826807	0.804373	0.812932	0.809498	0.782517	0.0461762	0.0312737	0.0642708	0.0262438	0.0292552	0.0272454	0.0373826	0.0312737	0.045133	0.0129322	0.210569	0.842688	0.849841	0.864324	0.812932
34	states	0.811213	0.811213	0.811213	0.811213	0.811213	0.811213	0.811213	0.811213	0.811213	0.811213	0.811213	0.811213	0.811213	0.811213	0.811213	0.811213	0.811213	0.811213	0.811213	0.811213	0.811213	0.811213	0.811213	0.811213	0.811213	0.811213	0.811213	0.811213	0.811213	0.811213	0.811213	0.811213	0.811213	0.0312737	0.0312737	0.0312737	0.0312737	0.0312737	0.0312737	0.0312737	0.0312737	0.0312737	0.0312737	0.0312737	0.811213	0.811213	0.811213	0.811213
34	clusters	0.794605	0.794605	0.794605	0.794605	0.794605	0.794605	0.794605	0.794605	0.794605	0.794605	0.794605	0.794605	0.794605	0.794605	0.794605	0.794605	0.794605	0.794605	0.794605	0.794605	0.794605	0.794605	0.794605	0.794605	0.794605	0.794605	0.794605	0.794605	0.794605	0.794605	0.794605	0.794605	0.794605	0.100676	0.100676	0.100676	0.100676	0.100676	0.100676	0.100676	0.100676	0.100676	0.100676	0.100676	0.794605	0.794605	0.794605	0.794605
35	fret	1.00288	0.875564	0.801512	0.926936	0.951857	1.05256	0.929686	0.864957	0.891609	1.01005	0.860998	1.01584	0.967278	0.886242	0.851799	0.915983	0.864957	0.918714	0.863636	0.980004	0.823232	0.939349	0.980004	0.920082	0.895645	1.04811	0.956048	0.968687	0.944896	0.935201	0.995695	0.931063	0.886242	0.935201	0.931063	1.08854	0.913256	1.00427	0.997129	0.820661	0.920082	0.858364	0.95465	0.149771	0.0461453	0.0382057	0.393987	0.915983
35	states	0.918714	0.918714	0.918714	0.918714	0.918714	0.918714	0.918714	0.918714	0.918714	0.918714	0.918714	0.918714	0.918714	0.918714	0.918714	0.918714	0.918714	0.918714	0.918714	0.918714	0.918714	0.918714	0.918714	0.918714	0.918714	0.918714	0.918714	0.918714	0.918714	0.918714	0.918714	0.918714	0.918714	0.918714	0.918714	0.918714	0.918714	0.918714	0.918714	0.918714	0.918714	0.918714	0.918714	0.23903	0.23903	0.23903	0.23903	0.918714
35	clusters	0.894008	0.894008	0.894008	0.894008	0.894008	0.894008	0.894008	0.894008	0.894008	0.894008	0.894008	0.894008	0.894008	0.894008	0.894008	0.894008	0.894008	0.894008	0.894008	0.894008	0.894008	0.894008	0.894008	0.894008	0.894008	0.894008	0.894008	0.894008	0.894008	0.894008	0.894008	0.894008	0.894008	0.894008	0.894008	0.894008	0.894008	0.894008	0.894008	0.894008	0.894008	0.894008	0.894008	0.327982	0.327982	0.327982	0.327982	0.894008
36	fret	0.66346	0.506195	0.559133	0.544203	0.563788	0.650577	0.609255	0.708537	0.635342	0.581492	0.662164	0.632827	0.536245	0.741729	0.588655	0.62283	0.595874	0.69242	0.553348	0.662164	0.639128	0.595874	0.654424	0.582682	0.593462	0.627815	0.761581	0.680468	0.587458	0.672581	0.579117	0.635342	0.597083	0.612938	0.727785	0.645472	0.704519	0.651857	0.659577	0.650577	0.642929	0.651857	0.636602	0.730559	0.635342	0.697779	0.545345	0.708537
36	states	0.636602	0.636602	0.636602	0.636602	0.636602	0.636602	0.636602	0.636602	0.636602	0.636602	0.636602	0.636602	0.636602	0.636602	0.636602	0.636602	0.636602	0.636602	0.636602	0.636602	0.636602	0.636602	0.636602	0.636602	0.636602	0.636602	0.636602	0.636602	0.636602	0.636602	0.636602	0.636602	0.636602	0.636602	0.636602	0.636602	0.636602	0.636602	0.636602	0.636602	0.636602	0.636602	0.636602	0.636602	0.636602	0.636602	0.636602	0.636602
36	clusters	0.556189	0.556189	0.556189	0.556189	0.556189	0.556189	0.556189	0.556189	0.556189	0.556189	0.556189	0.556189	0.556189	0.556189	0.556189	0.556189	0.556189	0.556189	0.556189	0.556189	0.556189	0.556189	0.556189	0.556189	0.556189	0.556189	0.556189	0.556189	0.556189	0.556189	0.556189	0.556189	0.556189	0.556189	0.556189	0.556189	0.556189	0.556189	0.556189	0.556189	0.556189	0.556189	0.556189	0.556189	0.556189	0.556189	0.556189	0.556189
37	fret	0.895144	0.884382	0.898237	0.916966	0.91069	0.834946	0.834946	0.830556	0.811721	0.937594	0.934398	0.929618	0.848221	0.85268	0.945624	0.91854	0.89052	0.901338	0.888982	0.776357	0.931209	0.827638	0.892059
37	states	0.850451	0.850451	0.850451	0.929618	0.929618	0.850451	0.850451	0.850451	0.850451	0.929618	0.929618	0.929618	0.850451	0.850451	0.929618	0.929618	0.850451	0.929618	0.850451	0.850451	0.929618	0.850451	0.850451
37	clusters	0.894008	0.894008	0.894008	0.894008	0.894008	0.894008	0.894008	0.894008	0.894008	0.894008	0.894008	0.894008	0.894008	0.894008	0.894008	0.894008	0.894008	0.894008	0.894008	0.894008	0.894008	0.894008	0.894008
38	fret	0.424149	0.575645	0.415341	0.529293	0.480627	0.530375	0.240817	0.534713	0.290537	0.561095	0.450992	0.485814	0.306212	0.286226	0.208483	0.590352	0.626297	0.543439	0.554442	0.429074	0.315911	0.41145	0.396025	0.372366	0.572271	0.227754	0.224516	0.591494	0.537977	0.521749	0.491027	0.396983	0.321241	0.425132	0.64408	0.315026	0.423167	0.46623	0.399861	0.364906	0.422186	0.377996	0.597247	0.407573	0.465209	0.582394	0.355656	0.342843
38	states	0.460118	0.460118	0.460118	0.460118	0.460118	0.460118	0.460118	0.460118	0.460118	0.460118	0.460118	0.460118	0.460118	0.460118	0.460118	0.460118	0.460118	0.460118	0.460118	0.460118	0.460118	0.460118	0.460118	0.460118	0.460118	0.460118	0.460118	0.460118	0.460118	0.460118	0.460118	0.460118	0.460118	0.460118	0.460118	0.460118	0.460118	0.460118	0.460118	0.460118	0.460118	0.460118	0.460118	0.460118	0.460118	0.460118	0.460118	0.460118
38	clusters	0.556189	0.556189	0.556189	0.556189	0.556189	0.556189	0.556189	0.556189	0.556189	0.556189	0.556189	0.556189	0.556189	0.556189	0.556189	0.556189	0.556189	0.556189	0.556189	0.556189	0.556189	0.556189	0.556189	0.556189	0.556189	0.556189	0.556189	0.556189	0.556189	0.556189	0.556189	0.556189	0.556189	0.556189	0.556189	0.556189	0.556189	0.556189	0.556189	0.556189	0.556189	0.556189	0.556189	0.556189	0.556189	0.556189	0.556189	0.556189
39	fret	0.224155	0.432251	0.330769	0.290255	0.393525	0.248381	0.396592	0.299632
39	states	0.3152	0.3152	0.3152	0.3152	0.3152	0.3152	0.3152	0.3152
39	clusters	0.327982	0.327982	0.327982	0.327982	0.327982	0.327982	0.327982	0.327982
40	fret	0.896071	0.898393	0.918202	0.842038	0.917033	0.845457	0.749016	0.903042	1.00963	0.903042	0.855738	0.897232	0.827268	0.900717	0.893752	0.925226	0.842038	0.884491	0.914697	0.889117	0.960597	0.843177	0.875259	0.889117	0.859174	0.817087	0.774493	0.900717	0.83067	0.894911	0.933441	0.933441	0.834075	0.837485	0.850022	0.730331	0.884491	0.889117	0.854594	0.859174	0.908864	0.818216	0.899555	0.918202	0.809193	0.885647	0.855738	0.814829
40	states	0.886803	0.886803	0.886803	0.886803	0.886803	0.886803	0.886803	0.886803	0.886803	0.886803	0.886803	0.886803	0.886803	0.886803	0.886803	0.886803	0.886803	0.886803	0.886803	0.886803	0.886803	0.886803	0.886803	0.886803	0.886803	0.886803	0.886803	0.886803	0.886803	0.886803	0.886803	0.886803	0.886803	0.886803	0.886803	0.886803	0.886803	0.886803	0.886803	0.886803	0.886803	0.886803	0.886803	0.886803	0.886803	0.886803	0.886803	0.886803
40	clusters	0.894008	0.894008	0.894008	0.894008	0.894008	0.894008	0.894008	0.894008	0.894008	0.894008	0.894008	0.894008	0.894008	0.894008	0.894008	0.894008	0.894008	0.894008	0.894008	0.894008	0.894008	0.894008	0.894008	0.894008	0.894008	0.894008	0.894008	0.894008	0.894008	0.894008	0.894008	0.894008	0.894008	0.894008	0.894008	0.894008	0.894008	0.894008	0.894008	0.894008	0.894008	0.894008	0.894008	0.894008	0.894008	0.894008	0.894008	0.894008
41	fret	0.826956	0.855088	0.826956	0.815066	0.84834	0.917276	0.841623	0.771029	0.826956	0.836272	0.874153	0.840284	0.837608	0.886542	0.785126	0.84565	0.822982	0.853736	0.826956	0.822982	0.435391	0.824305	0.808504	0.824305	0.886542	0.824305	0.907427	0.832272	0.833604	0.872783	0.815066	0.853736	0.859152	0.849687	0.838945	0.901828	0.792876
41	states	0.836272	0.836272	0.836272	0.836272	0.836272	0.836272	0.836272	0.836272	0.836272	0.836272	0.836272	0.836272	0.836272	0.836272	0.836272	0.836272	0.836272	0.836272	0.836272	0.836272	0.836272	0.836272	0.836272	0.836272	0.836272	0.836272	0.836272	0.836272	0.836272	0.836272	0.836272	0.836272	0.836272	0.836272	0.836272	0.836272	0.836272
41	clusters	0.794605	0.794605	0.794605	0.794605	0.794605	0.794605	0.794605	0.794605	0.794605	0.794605	0.794605	0.794605	0.794605	0.794605	0.794605	0.794605	0.794605	0.794605	0.794605	0.794605	0.794605	0.794605	0.794605	0.794605	0.794605	0.794605	0.794605	0.794605	0.794605	0.794605	0.794605	0.794605	0.794605	0.794605	0.794605	0.794605	0.794605
42	fret	0.0331348	0.0461395	0.069371	0.056162	0.0316124	0.056162	0.106509	0.162736	0.112923	0.0415366	0.0538417	0.0701517	0.0592594	0.0430693	0.0278131
42	states	0.0499906	0.0499906	0.0499906	0.0499906	0.0499906	0.0499906	0.112923	0.112923	0.112923	0.0499906	0.0499906	0.0499906	0.0499906	0.0499906	0.0499906
42	clusters	0.100676	0.100676	0.100676	0.100676	0.100676	0.100676	0.100676	0.100676	0.100676	0.100676	0.100676	0.100676	0.100676	0.100676	0.100676
43	fret	0.882582	0.855789	0.785111	0.912828	0.970836	0.684616	0.747295	0.773256	0.892589	0.858584	0.924529
43	states	0.858584	0.858584	0.858584	0.858584	0.858584	0.858584	0.858584	0.858584	0.858584	0.858584	0.858584
43	clusters	0.894008	0.894008	0.894008	0.894008	0.894008	0.894008	0.894008	0.894008	0.894008	0.894008	0.894008
44	fret	0.0817034	0.308444	1.07885	0.577454	0.0805644	0.0520024	0.0930584	0.407106	0.987088	0.770936	0.524973	0.980179	0.998282	0.95413	0.486822	0.385314	0.327561	0.254768	0.399858	0.87374	0.968918	0.942773	1.00774	0.962838	0.933131	0.855789	0.842258	0.909334	0.591177	0.0104618	0.152638	-0.00465964	0.189225	0.0174193	0.116789	0.0139423	0.179285	0.225428	0.0998562	0.826851	0.882677	0.947146	0.961098	0.977584	0.796725	0.275264	0.947146	0.928738
44	states	0.184255	0.184255	0.95413	0.184255	0.184255	0.184255	0.184255	0.184255	0.95413	0.95413	0.524973	0.95413	0.95413	0.95413	0.184255	0.184255	0.184255	0.184255	0.184255	0.95413	0.95413	0.95413	0.95413	0.95413	0.95413	0.95413	0.95413	0.95413	0.184255	0.184255	0.184255	0.184255	0.184255	0.184255	0.184255	0.184255	0.184255	0.184255	0.184255	0.95413	0.95413	0.95413	0.95413	0.95413	0.95413	0.184255	0.95413	0.95413
44	clusters	0.100676	0.100676	0.894008	0.100676	0.100676	0.100676	0.100676	0.100676	0.894008	0.894008	0.556189	0.894008	0.894008	0.894008	0.100676	0.100676	0.100676	0.100676	0.100676	0.894008	0.894008	0.894008	0.894008	0.894008	0.894008	0.894008	0.894008	0.894008	0.100676	0.100676	0.100676	0.100676	0.100676	0.100676	0.100676	0.100676	0.100676	0.100676	0.100676	0.894008	0.894008	0.894008	0.894008	0.894008	0.894008	0.100676	0.894008	0.894008
45	fret	1.02219	0.793861	0.792798	1.21124	0.888305	0.952617	0.882892	0.800236	0.849457	0.876403	0.904579	0.93619	0.980112	0.872082	1.02106	0.879647	0.984525	0.787485	0.908928	0.889388	0.715781	0.859141	0.908928	0.858064	0.824791	0.738868	0.815172	0.803431	0.949327	0.900234	0.874242	0.859141	0.81624	0.831214	0.789609	0.837645	0.976805	0.924177	0.869923	0.869923	1.02329	0.799172	0.967996	0.835501	0.824791	0.859141	0.967996	0.904579
45	states	0.857526	0.857526	0.857526	0.857526	0.857526	0.857526	0.857526	0.857526	0.857526	0.857526	0.857526	0.857526	0.857526	0.857526	0.857526	0.857526	0.857526	0.857526	0.857526	0.857526	0.857526	0.857526	0.857526	0.857526	0.857526	0.857526	0.857526	0.857526	0.857526	0.857526	0.857526	0.857526	0.857526	0.857526	0.857526	0.857526	0.857526	0.857526	0.857526	0.857526	0.857526	0.857526	0.857526	0.857526	0.857526	0.857526	0.857526	0.857526
45	clusters	0.894008	0.894008	0.894008	0.894008	0.894008	0.894008	0.894008	0.894008	0.894008	0.894008	0.894008	0.894008	0.894008	0.894008	0.894008	0.894008	0.894008	0.894008	0.894008	0.894008	0.894008	0.894008	0.894008	0.894008	0.894008	0.894008	0.894008	0.894008	0.894008	0.894008	0.894008	0.894008	0.894008	0.894008	0.894008	0.894008	0.894008	0.894008	0.894008	0.894008	0.894008	0.894008	0.894008	0.894008	0.894008	0.894008	0.894008	0.894008
46	fret	0.844679	0.973375	0.880491	0.811171	0.989722	0.929046	0.966465	0.79748	0.833852	0.903543	0.961272	0.558899	0.242616	0.522142	1.06845	0.696117	0.96733	0.936044	0.850977	1.00342	0.906191	0.867111	1.00087	0.670485	1.06176	0.88227	1.00429	0.88316	0.940409	0.966465	0.88227	0.859055	0.876929	0.859055	0.864428	0.864428	0.864428	0.874254	0.859055	1.01195	0.793819	0.99058	0.950859	0.98113	0.846479	0.99829	0.909719	1.03991
46	states	0.899123	0.899123	0.899123	0.899123	0.899123	0.899123	0.899123	0.899123	0.899123	0.899123	0.899123	0.530126	0.110482	0.530126	0.899123	0.899123	0.899123	0.899123	0.899123	0.899123	0.899123	0.899123	0.899123	0.899123	0.899123	0.899123	0.899123	0.899123	0.899123	0.899123	0.899123	0.899123	0.899123	0.899123	0.899123	0.899123	0.899123	0.899123	0.899123	0.899123	0.899123	0.899123	0.899123	0.899123	0.899123	0.899123	0.899123	0.899123
46	clusters	0.894008	0.894008	0.894008	0.894008	0.894008	0.894008	0.894008	0.894008	0.894008	0.894008	0.894008	0.556189	0.100676	0.556189	0.894008	0.894008	0.894008	0.894008	0.894008	0.894008	0.894008	0.894008	0.894008	0.894008	0.894008	0.894008	0.894008	0.894008	0.894008	0.894008	0.894008	0.894008	0.894008	0.894008	0.894008	0.894008	0.894008	0.894008	0.894008	0.894008	0.894008	0.894008	0.894008	0.894008	0.894008	0.894008	0.894008	0.894008
47	fret	0.989086	0.967384	0.975804	1.00974	1.04779	0.936331	0.9746
47	states	0.975804	0.975804	0.975804	0.975804	0.975804	0.975804	0.975804
47	clusters	0.894008	0.894008	0.894008	0.894008	0.894008	0.894008	0.894008
48	fret	0.131524	0.101888	0.140306	0.138547	0.141186	0.139427	0.135033	0.101022	0.292528	0.0958298	0.128019	0.105357	0.135033	0.129771	0.101888	0.149117	0.173067	0.0915112	0.132401	0.100156	0.149117	0.110569	0.0717402	0.0906483	0.0284487	0.0906483	0.0915112	0.105357	0.0546738	0.0674627	0.150002	0.101888	0.0889235	0.0837562	0.0674627	0.107093	0.123645	0.09929	0.0811765	0.0444894	0.0725954	0.105357	0.105357	0.0419498	0.0871999	0.107961	0.00916836	0.103622
48	states	0.142948	0.142948	0.142948	0.142948	0.142948	0.142948	0.142948	0.142948	0.142948	0.142948	0.142948	0.142948	0.142948	0.142948	0.102755	0.142948	0.142948	0.102755	0.102755	0.102755	0.102755	0.102755	0.102755	0.102755	0.102755	0.102755	0.102755	0.102755	0.102755	0.102755	0.102755	0.102755	0.102755	0.102755	0.102755	0.102755	0.102755	0.102755	0.102755	0.102755	0.102755	0.102755	0.102755	0.102755	0.102755	0.102755	0.102755	0.102755
48	clusters	0.100676	0.100676	0.100676	0.100676	0.100676	0.100676	0.100676	0.100676	0.100676	0.100676	0.100676	0.100676	0.100676	0.100676	0.100676	0.100676	0.100676	0.100676	0.100676	0.100676	0.100676	0.100676	0.100676	0.100676	0.100676	0.100676	0.100676	0.100676	0.100676	0.100676	0.100676	0.100676	0.100676	0.100676	0.100676	0.100676	0.100676	0.100676	0.100676	0.100676	0.100676	0.100676	0.100676	0.100676	0.100676	0.100676	0.100676	0.100676
49	fret	0.812821	0.881175	0.954736	0.932498	0.877382	0.966615	0.846063	0.945548	0.839862	0.913088	0.890057	0.851039	0.826292	0.891329	0.827522	0.829983	0.823836	0.931197	0.862283	0.933799	0.946858	0.874857	0.896426	0.828752	0.893876	0.752801	0.821382	0.882441	0.84234	0.910515	0.891329	0.787373	0.826292	0.895151	0.883708	0.774182	0.939011	0.954736	0.863537	0.86856	0.876119	0.828752	0.866047	0.872335	0.893876	0.852285	0.871076	0.910515
49	states	0.873596	0.873596	0.873596	0.873596	0.873596	0.873596	0.873596	0.873596	0.873596	0.873596	0.873596	0.873596	0.873596	0.873596	0.873596	0.873596	0.873596	0.873596	0.873596	0.873596	0.873596	0.873596	0.873596	0.873596	0.873596	0.873596	0.873596	0.873596	0.873596	0.873596	0.873596	0.873596	0.873596	0.873596	0.873596	0.873596	0.873596	0.873596	0.873596	0.873596	0.873596	0.873596	0.873596	0.873596	0.873596	0.873596	0.873596	0.873596
49	clusters	0.894008	0.894008	0.894008	0.894008	0.894008	0.894008	0.894008	0.894008	0.894008	0.894008	0.894008	0.894008	0.894008	0.894008	0.894008	0.894008	0.894008	0.894008	0.894008	0.894008	0.894008	0.894008	0.894008	0.894008	0.894008	0.894008	0.894008	0.894008	0.894008	0.894008	0.894008	0.894008	0.894008	0.894008	0.894008	0.894008	0.894008	0.894008	0.894008	0.894008	0.894008	0.894008	0.894008	0.894008	0.894008	0.894008	0.894008	0.894008
50	fret	0.839349	0.988702	0.849671	0.751752	0.808772	0.881037	0.94288	1.1417	0.793699	0.978877	0.812563	1.12031	0.801218	0.863972	0.825263	0.94151	0.882357	0.777529	0.92788	0.835495	0.923812	0.931957	0.838063	0.783729	0.946994	0.736003	0.90095	1.02135	0.789953	0.895616	0.385878	0.127072	0.0099209	0.0742084	0.0541233	0	-0.058522	-0.0758566	0.0106327	-0.0175141	-0.00703646	0.0329084	0.0336339	-0.0347741	0.0256778	0.00565905	0.16762	0.0779667
50	states	0.871826	0.871826	0.871826	0.871826	0.871826	0.871826	0.871826	0.871826	0.871826	0.871826	0.871826	0.871826	0.871826	0.871826	0.871826	0.871826	0.871826	0.871826	0.871826	0.871826	0.871826	0.871826	0.871826	0.871826	0.871826	0.871826	0.871826	0.871826	0.871826	0.871826	0.0318211	0.0318211	0.0318211	0.0318211	0.0318211	0.0318211	0.0318211	0.0318211	0.0318211	0.0318211	0.0318211	0.0318211	0.0318211	0.0318211	0.0318211	0.0318211	0.0318211	0.0318211
50	clusters	0.894008	0.894008	0.894008	0.894008	0.894008	0.894008	0.894008	0.894008	0.894008	0.894008	0.894008	0.894008	0.894008	0.894008	0.894008	0.894008	0.894008	0.894008	0.894008	0.894008	0.894008	0.894008	0.894008	0.894008	0.894008	0.894008	0.894008	0.894008	0.894008	0.894008	0.100676	0.100676	0.100676	0.100676	0.100676	0.100676	0.100676	0.100676	0.100676	0.100676	0.100676	0.100676	0.100676	0.100676	0.100676	0.100676	0.100676	0.100676
51	fret	0.847052	1.01627	0.879419	0.814075	0.913899	0.98531	0.843055	0.802383	0.883515	0.929324	0.769128	0.888993	0.988237	0.900012	0.808867	0.890366	0.78694	0.76408	1.03282	0.792069	0.875334	0.793354	0.792069	0.824547	0.897249	0.848386	0.869905	0.936388	1.03282	0.810167	0.913899	0.944908	0.78694	0.856419	0.855077	0.726773	0.913899	0.835094	0.780553	0.811469	0.852397	0.779279	1.06326	0.856419	0.793354	1.0434	0.888993	0.883515
51	states	0.824547	0.824547	0.824547	0.824547	0.824547	0.824547	0.824547	0.824547	0.824547	0.824547	0.824547	0.824547	0.824547	0.824547	0.824547	0.824547	0.824547	0.824547	0.824547	0.824547	0.824547	0.824547	0.824547	0.824547	0.824547	0.824547	0.824547	0.824547	0.824547	0.824547	0.824547	0.824547	0.824547	0.824547	0.824547	0.824547	0.824547	0.824547	0.824547	0.824547	0.824547	0.824547	0.824547	0.824547	0.824547	0.824547	0.824547	0.824547
51	clusters	0.794605	0.794605	0.794605	0.794605	0.794605	0.794605	0.794605	0.794605	0.794605	0.794605	0.794605	0.794605	0.794605	0.794605	0.794605	0.794605	0.794605	0.794605	0.794605	0.794605	0.794605	0.794605	0.794605	0.794605	0.794605	0.794605	0.794605	0.794605	0.794605	0.794605	0.794605	0.794605	0.794605	0.794605	0.794605	0.794605	0.794605	0.794605	0.794605	0.794605	0.794605	0.794605	0.794605	0.794605	0.794605	0.794605	0.794605	0.794605
52	fret	0.98702	0.98908	0.982888	0.895244	0.932743	0.865716	1.06897	0.966197	0.880184	1.00207	0.937792	0.944248	0.896739	0.960576	0.838483	0.931297	0.928398	1.01081	0.977353	0.947819	0.969696	0.921846	0.877907	0.918922	0.989766	0.99182	0.96339	0.836908	0.948531	0.833753	0.928398	0.952088	0.96128	1.03276	0.887739	0.921846	0.857981	0.890747	0.982197	0.856433	0.882456	0.924763	0.952088	1.00812	0.925491	0.895244	0.940666	0.901955
52	states	0.921846	0.921846	0.921846	0.921846	0.921846	0.921846	0.921846	0.921846	0.921846	0.921846	0.921846	0.921846	0.921846	0.921846	0.921846	0.921846	0.921846	0.921846	0.921846	0.921846	0.921846	0.921846	0.921846	0.921846	0.921846	0.921846	0.921846	0.921846	0.921846	0.921846	0.921846	0.921846	0.921846	0.921846	0.921846	0.921846	0.921846	0.921846	0.921846	0.921846	0.921846	0.921846	0.921846	0.921846	0.921846	0.921846	0.921846	0.921846
52	clusters	0.894008	0.894008	0.894008	0.894008	0.894008	0.894008	0.894008	0.894008	0.894008	0.894008	0.894008	0.894008	0.894008	0.894008	0.894008	0.894008	0.894008	0.894008	0.894008	0.894008	0.894008	0.894008	0.894008	0.894008	0.894008	0.894008	0.894008	0.894008	0.894008	0.894008	0.894008	0.894008	0.894008	0.894008	0.894008	0.894008	0.894008	0.894008	0.894008	0.894008	0.894008	0.894008	0.894008	0.894008	0.894008	0.894008	0.894008	0.894008
53	fret	0.105593	0.0779204	0.0899902	0.0727638	0.143253	0.271646	0.359249	0.430069	0.126545	0.0753414	0.609772	0.828756	0.809579	0.811828	0.828756	0.821973	0.84237	0.789394	0.792761	0.806207	0.816333	0.600349
53	states	0.105593	0.105593	0.105593	0.105593	0.105593	0.105593	0.359249	0.105593	0.105593	0.105593	0.605061	0.814081	0.814081	0.814081	0.814081	0.814081	0.814081	0.814081	0.814081	0.814081	0.814081	0.605061
53	clusters	0.100676	0.100676	0.100676	0.100676	0.100676	0.100676	0.327982	0.100676	0.100676	0.100676	0.556189	0.794605	0.794605	0.794605	0.794605	0.794605	0.794605	0.794605	0.794605	0.794605	0.794605	0.556189
54	fret	0.807815	0.82957	0.756895	0.782024	0.81708	0.812437	0.818633	0.762749	0.832716	0.835873	0.68794	0.759818	0.81553	0.806279	0.762749
54	states	0.807815	0.807815	0.807815	0.807815	0.807815	0.807815	0.807815	0.807815	0.807815	0.807815	0.807815	0.807815	0.807815	0.807815	0.807815
54	clusters	0.794605	0.794605	0.794605	0.794605	0.794605	0.794605	0.794605	0.794605	0.794605	0.794605	0.794605	0.794605	0.794605	0.794605	0.794605
55	fret	0.0171874	0.0941437	0.137418	0.194327	0.0853159	0.0853159	0.111625	0.16132	0.0418068	0.184788	0.0584767	0.0867913	0	0.114516	0.0970732	0.0985356	0.211857	0.148721	0.16132	0.209176	0.148721	0.0823603	0.0569697	0.0463736	0.0156338	0.00157143	0.545607	0.925049	0.926432	0.978757	0.930566	0.948268	0.873147	0.887634	0.930566	0.908999	0.913914	0.941501	0.918802	0.93194	0.868713	0.930566	0.942858	0.952305	0.986541	0.976147	0.905472	0.94218
55	states	0.11307	0.11307	0.11307	0.11307	0.11307	0.11307	0.11307	0.11307	0.11307	0.11307	0.11307	0.11307	0.11307	0.11307	0.11307	0.11307	0.11307	0.11307	0.11307	0.11307	0.11307	0.11307	0.11307	0.11307	0.11307	0.11307	0.11307	0.912863	0.912863	0.912863	0.912863	0.912863	0.912863	0.912863	0.912863	0.912863	0.912863	0.912863	0.912863	0.912863	0.912863	0.912863	0.912863	0.912863	0.912863	0.912863	0.912863	0.912863
55	clusters	0.100676	0.100676	0.100676	0.100676	0.100676	0.100676	0.100676	0.100676	0.100676	0.100676	0.100676	0.100676	0.100676	0.100676	0.100676	0.100676	0.100676	0.100676	0.100676	0.100676	0.100676	0.100676	0.100676	0.100676	0.100676	0.100676	0.100676	0.894008	0.894008	0.894008	0.894008	0.894008	0.894008	0.894008	0.894008	0.894008	0.894008	0.894008	0.894008	0.894008	0.894008	0.894008	0.894008	0.894008	0.894008	0.894008	0.894008	0.894008
56	fret	0.269997	0.153103	0.240179	0.219913	0.249721	0.169412	0.181702	0.216843	0.152403	0.162275	0.217609	0.21455	0.198692	0.262635	0.216078	0.243346	0.194223	0.225315	0.265081	0.272467	0.266716	0.208468	0.261822	0.266716	0.239389	0.204692	0.266716	0.262635	0.257767	0.180972	0.233884	0.215313	0.173008	0.199439	0.288296	0.173008	0.148214	0.203188	0.2062	0.209984	0.081885	0.165122	0.251323	0.219913	0.188308	0.174451	0.269997	0.200187
56	states	0.204692	0.204692	0.204692	0.204692	0.204692	0.204692	0.204692	0.204692	0.204692	0.204692	0.204692	0.204692	0.204692	0.204692	0.204692	0.204692	0.204692	0.204692	0.204692	0.204692	0.204692	0.204692	0.204692	0.204692	0.204692	0.204692	0.204692	0.204692	0.204692	0.204692	0.204692	0.204692	0.204692	0.204692	0.204692	0.204692	0.204692	0.204692	0.204692	0.204692	0.204692	0.204692	0.204692	0.204692	0.204692	0.204692	0.204692	0.204692
56	clusters	0.100676	0.100676	0.100676	0.100676	0.100676	0.100676	0.100676	0.100676	0.100676	0.100676	0.100676	0.100676	0.100676	0.100676	0.100676	0.100676	0.100676	0.100676	0.100676	0.100676	0.100676	0.100676	0.100676	0.100676	0.100676	0.100676	0.100676	0.100676	0.100676	0.100676	0.100676	0.100676	0.100676	0.100676	0.100676	0.100676	0.100676	0.100676	0.100676	0.100676	0.100676	0.100676	0.100676	0.100676	0.100676	0.100676	0.100676	0.100676
57	fret	0.90866	0.877221	0.833878	0.782324	0.906405	0.860489	0.806364	0.903026	0.888418	0.912045	0.836088	0.907532	0.877221	0.870519	0.852707	0.862715	0.842726	0.882815	0.857152	0.830565	0.800886	0.857152	0.890661	0.816245	0.876103	0.89965	0.907532	0.883935	0.918823
57	states	0.876103	0.876103	0.876103	0.876103	0.876103	0.876103	0.876103	0.876103	0.876103	0.876103	0.876103	0.876103	0.876103	0.876103	0.876103	0.876103	0.876103	0.876103	0.876103	0.876103	0.876103	0.876103	0.876103	0.876103	0.876103	0.876103	0.876103	0.876103	0.876103
57	clusters	0.894008	0.894008	0.894008	0.894008	0.894008	0.894008	0.894008	0.894008	0.894008	0.894008	0.894008	0.894008	0.894008	0.894008	0.894008	0.894008	0.894008	0.894008	0.894008	0.894008	0.894008	0.894008	0.894008	0.894008	0.894008	0.894008	0.894008	0.894008	0.894008
58	fret	0.782981	0.797381	0.837597	0.828303	0.820048	0.770655	0.777844	0.800469	0.728646	0.8469	0.816955	0.860351	0.740924	0.873819	0.696993	0.814893	0.827271	0.85828	0.808705	0.781954	0.781954	0.874856	0.760393	0.777844	0.793265	0.984277	0.835531	0.814893	0.773735	0.838631	0.857245	0.761419	0.85621	0.828303	0.748092	0.823143	0.774762	0.735806	0.720468	0.7399	0.826239	0.815923	0.823143	0.869673	0.85828	0.809735
58	states	0.782981	0.782981	0.782981	0.782981	0.823143	0.782981	0.782981	0.823143	0.782981	0.823143	0.782981	0.823143	0.782981	0.782981	0.782981	0.782981	0.823143	0.782981	0.823143	0.782981	0.782981	0.782981	0.782981	0.782981	0.823143	0.782981	0.782981	0.823143	0.782981	0.823143	0.782981	0.782981	0.782981	0.823143	0.782981	0.823143	0.782981	0.782981	0.782981	0.782981	0.823143	0.782981	0.823143	0.782981	0.782981	0.782981
58	clusters	0.794605	0.794605	0.794605	0.794605	0.794605	0.794605	0.794605	0.794605	0.794605	0.794605	0.794605	0.794605	0.794605	0.794605	0.794605	0.794605	0.794605	0.794605	0.794605	0.794605	0.794605	0.794605	0.794605	0.794605	0.794605	0.794605	0.794605	0.794605	0.794605	0.794605	0.794605	0.794605	0.794605	0.794605	0.794605	0.794605	0.794605	0.794605	0.794605	0.794605	0.794605	0.794605	0.794605	0.794605	0.794605	0.794605
59	fret	0.93588	0.918525	0.940201	0.928951	0.81658	1.00507	0.894923	0.940201	0.959994	1.17265	0.979644	0.91417	0.953985	0.849787	0.893167	0.90806	0.894923	0.9677	0.864914	0.926348	0.874658	0.848002	0.908934	1.03109	0.863138	0.984747	1.00255	0.884368	0.973679	0.89053	0.953985	0.872889	1.00507	0.866688	0.955703	0.937609	0.904563	0.964277	1.00592	0.941928	0.89053	0.800282	0.906312	0.876426	0.922005	0.887891	0.856026	0.818385
59	states	0.928084	0.928084	0.928084	0.928084	0.928084	0.928084	0.928084	0.928084	0.928084	0.928084	0.928084	0.928084	0.928084	0.928084	0.928084	0.928084	0.928084	0.928084	0.928084	0.928084	0.928084	0.928084	0.928084	0.928084	0.928084	0.928084	0.928084	0.928084	0.928084	0.928084	0.928084	0.928084	0.928084	0.928084	0.928084	0.928084	0.928084	0.928084	0.928084	0.928084	0.928084	0.928084	0.928084	0.928084	0.928084	0.928084	0.928084	0.928084
59	clusters	0.894008	0.894008	0.894008	0.894008	0.894008	0.894008	0.894008	0.894008	0.894008	0.894008	0.894008	0.894008	0.894008	0.894008	0.894008	0.894008	0.894008	0.894008	0.894008	0.894008	0.894008	0.894008	0.894008	0.894008	0.894008	0.894008	0.894008	0.894008	0.894008	0.894008	0.894008	0.894008	0.894008	0.894008	0.894008	0.894008	0.894008	0.894008	0.894008	0.894008	0.894008	0.894008	0.894008	0.894008	0.894008	0.894008	0.894008	0.894008
60	fret	0.865961	0.811488	0.883632	0.862195	0.807831	0.789658	0.954704	0.848454	0.88617	0.889984	0.898913	0.919481	0.950758	0.77884	0.874776	0.910455	0.936359	0.854688	0.827416	0.878566	0.850945	0.884901	0.868475	0.9066	0.826186	0.869733	0.859689	0.823728	0.83605	0.86345	0.802967	0.862195	0.850945	0.879831	0.839763	0.892531	0.823728	0.805398	0.920774	0.883632	0.798116	0.809049	0.845967	0.889984	0.896357	0.810268	0.839763	0.864705
60	states	0.86345	0.86345	0.86345	0.86345	0.86345	0.86345	0.86345	0.86345	0.86345	0.86345	0.86345	0.86345	0.86345	0.86345	0.86345	0.86345	0.86345	0.86345	0.86345	0.86345	0.86345	0.86345	0.86345	0.86345	0.86345	0.86345	0.86345	0.86345	0.86345	0.86345	0.86345	0.86345	0.86345	0.86345	0.86345	0.86345	0.86345	0.86345	0.86345	0.86345	0.86345	0.86345	0.86345	0.86345	0.86345	0.86345	0.86345	0.86345
60	clusters	0.894008	0.894008	0.894008	0.894008	0.894008	0.894008	0.894008	0.894008	0.894008	0.894008	0.894008	0.894008	0.894008	0.894008	0.894008	0.894008	0.894008	0.894008	0.894008	0.894008	0.894008	0.894008	0.894008	0.894008	0.894008	0.894008	0.894008	0.894008	0.894008	0.894008	0.894008	0.894008	0.894008	0.894008	0.894008	0.894008	0.894008	0.894008	0.894008	0.894008	0.894008	0.894008	0.894008	0.894008	0.894008	0.894008	0.894008	0.894008
61	fret	0.146614	0.136966	0.148003	0.0964348	0.0723595	0.134233	0.0779836	0.109461	0.12274	0.12745	0.102265	0.126101	0.124749	0.123411	0.0893762	0.0786114	0.114742	0.115405	0.100965	0.0817596	0.106181	0.0624776	0.0868277	0.101615	0.090654	0.0220728	0.0798689	0.0711161	0.100965	0.0569835	-0.00443365	-0.069848	0.0836516	0.0655498	0.0140603	0.0938594	0.0945024	0.0925754	0.0624776	0.0938594	0.0945024	0.09902	0.0842848	0.12207	0.0748532	0.0919344	0.102916	0.09902
61	states	0.090654	0.090654	0.090654	0.090654	0.090654	0.090654	0.090654	0.090654	0.090654	0.090654	0.090654	0.090654	0.090654	0.090654	0.090654	0.090654	0.090654	0.090654	0.090654	0.090654	0.090654	0.090654	0.090654	0.090654	0.090654	0.090654	0.090654	0.090654	0.090654	0.090654	-0.0277382	-0.0277382	0.090654	0.090654	0.090654	0.090654	0.090654	0.090654	0.090654	0.090654	0.090654	0.090654	0.090654	0.090654	0.090654	0.090654	0.090654	0.090654
61	clusters	0.100676	0.100676	0.100676	0.100676	0.100676	0.100676	0.100676	0.100676	0.100676	0.100676	0.100676	0.100676	0.100676	0.100676	0.100676	0.100676	0.100676	0.100676	0.100676	0.100676	0.100676	0.100676	0.100676	0.100676	0.100676	0.100676	0.100676	0.100676	0.100676	0.100676	0.100676	0.100676	0.100676	0.100676	0.100676	0.100676	0.100676	0.100676	0.100676	0.100676	0.100676	0.100676	0.100676	0.100676	0.100676	0.100676	0.100676	0.100676
62	fret	0.870834	0.866313	0.878761	0.869703	0.910659	0.832605	0.822561	0.849416	0.821446	0.825905	0.838199	0.801456	0.827021	0.838199	0.873097	0.818106	0.801456	0.866313	0.892393	0.861799	0.789287	0.846047	0.79482	0.778289	0.868573	0.852788	0.85054	0.815881	0.85054	0.835961	0.848292	0.830371	0.855039	0.838199	0.852788	0.85054	0.820333	0.760749	0.894671	0.832605	0.89581	0.84156	0.833723	0.810326	0.843803	0.808106	0.819219	0.789287
62	states	0.843803	0.843803	0.843803	0.843803	0.843803	0.843803	0.843803	0.843803	0.843803	0.843803	0.843803	0.843803	0.843803	0.843803	0.843803	0.843803	0.843803	0.843803	0.843803	0.843803	0.843803	0.843803	0.843803	0.843803	0.843803	0.843803	0.843803	0.843803	0.843803	0.843803	0.843803	0.843803	0.843803	0.843803	0.843803	0.843803	0.843803	0.843803	0.843803	0.843803	0.843803	0.843803	0.843803	0.843803	0.843803	0.843803	0.843803	0.843803
62	clusters	0.794605	0.794605	0.794605	0.794605	0.794605	0.794605	0.794605	0.794605	0.794605	0.794605	0.794605	0.794605	0.794605	0.794605	0.794605	0.794605	0.794605	0.794605	0.794605	0.794605	0.794605	0.794605	0.794605	0.794605	0.794605	0.794605	0.794605	0.794605	0.794605	0.794605	0.794605	0.794605	0.794605	0.794605	0.794605	0.794605	0.794605	0.794605	0.794605	0.794605	0.794605	0.794605	0.794605	0.794605	0.794605	0.794605	0.794605	0.794605
63	fret	0.887915	0.851671	0.884977	0.870388	0.812284	0.82062	0.465859	0.93739	0.873293	0.882046	0.850243	0.880583	0.860275	0.893811	0.868939	0.853101	0.858837	0.851671	0.870388	0.876204	0.92522	0.851671	0.898251	0.876204	0.905686	0.874747	0.877662	0.848816	0.886445	0.874747	0.868939	0.898251	0.928252	0.861715	0.884977	0.88351	0.916168	0.893811	0.854533	0.831822	0.8109	0.90122	0.858837	0.892335	0.853101	0.898251	0.866044	0.89677
63	states	0.874747	0.874747	0.874747	0.874747	0.874747	0.874747	0.874747	0.874747	0.874747	0.874747	0.874747	0.874747	0.874747	0.874747	0.874747	0.874747	0.874747	0.874747	0.874747	0.874747	0.874747	0.874747	0.874747	0.874747	0.874747	0.874747	0.874747	0.874747	0.874747	0.874747	0.874747	0.874747	0.874747	0.874747	0.874747	0.874747	0.874747	0.874747	0.874747	0.874747	0.874747	0.874747	0.874747	0.874747	0.874747	0.874747	0.874747	0.874747
63	clusters	0.894008	0.894008	0.894008	0.894008	0.894008	0.894008	0.894008	0.894008	0.894008	0.894008	0.894008	0.894008	0.894008	0.894008	0.894008	0.894008	0.894008	0.894008	0.894008	0.894008	0.894008	0.894008	0.894008	0.894008	0.894008	0.894008	0.894008	0.894008	0.894008	0.894008	0.894008	0.894008	0.894008	0.894008	0.894008	0.894008	0.894008	0.894008	0.894008	0.894008	0.894008	0.894008	0.894008	0.894008	0.894008	0.894008	0.894008	0.894008
64	fret	0.838603	0.857836	0.802998	0.866304	0.894364	0.825479	0.91286	0.911622	0.909148	0.939019	0.872373	0.891909	0.848198	0.867516	0.889458	0.911622	0.95537	0.815984	0.844595	0.818354	0.906677	0.877241	0.942782	0.869943	0.780751	0.902976	0.844595	0.832627	1.02197	0.899281	0.861461	0.890683	0.940272	0.915338	0.891909	0.859043	0.891909	0.879679	0.909148	0.935263	0.926523	1.01159	0.755278	0.895592	0.876023	0.911622	0.880899	0.906677
64	states	0.877241	0.877241	0.877241	0.877241	0.877241	0.877241	0.877241	0.877241	0.877241	0.877241	0.877241	0.877241	0.877241	0.877241	0.877241	0.877241	0.877241	0.877241	0.877241	0.877241	0.877241	0.877241	0.877241	0.877241	0.877241	0.877241	0.877241	0.877241	0.877241	0.877241	0.877241	0.877241	0.877241	0.877241	0.877241	0.877241	0.877241	0.877241	0.877241	0.877241	0.877241	0.877241	0.877241	0.877241	0.877241	0.877241	0.877241	0.877241
64	clusters	0.894008	0.894008	0.894008	0.894008	0.894008	0.894008	0.894008	0.894008	0.894008	0.894008	0.894008	0.894008	0.894008	0.894008	0.894008	0.894008	0.894008	0.894008	0.894008	0.894008	0.894008	0.894008	0.894008	0.894008	0.894008	0.894008	0.894008	0.894008	0.894008	0.894008	0.894008	0.894008	0.894008	0.894008	0.894008	0.894008	0.894008	0.894008	0.894008	0.894008	0.894008	0.894008	0.894008	0.894008	0.894008	0.894008	0.894008	0.894008
65	fret	0.78839	0.857487	0.791355	0.893931	0.958805	0.795308	0.595874	0.709184	0.824937	0.790367	0.721081	0.694306	0.665512	0.745849	0.831845	0.827898	0.766634	0.701251	0.711167	0.802225
65	states	0.789379	0.789379	0.789379	0.789379	0.789379	0.789379	0.789379	0.789379	0.789379	0.789379	0.789379	0.789379	0.789379	0.789379	0.789379	0.789379	0.789379	0.789379	0.789379	0.789379
65	clusters	0.794605	0.794605	0.794605	0.794605	0.794605	0.794605	0.794605	0.794605	0.794605	0.794605	0.794605	0.794605	0.794605	0.794605	0.794605	0.794605	0.794605	0.794605	0.794605	0.794605
66	fret	0.826906	0.823012	0.799854	0.849163	0.839959	0.819128	0.812676	0.820421	0.825607	0.845212
66	states	0.824309	0.824309	0.824309	0.824309	0.824309	0.824309	0.824309	0.824309	0.824309	0.824309
66	clusters	0.794605	0.794605	0.794605	0.794605	0.794605	0.794605	0.794605	0.794605	0.794605	0.794605
67	fret	0.0874814	0.0905603	0.109021	0.118244	0.136673	0.0926126	0.127461	0.0956905	0.130533	0.0844019	0.148948	0.076187	0.0350496	0.0587165	0.0381386	0.0844019	0.0607728	0.0915865	0.0895344	0.101845	0.0936386	0.0134103	0.101845	0.0618009	0.0412269	0.0638568	0.052546	0.129509	0.0885081	0.143835	0.0401975	0.037109	0.0443148	0.0997935
67	states	0.0890212	0.0890212	0.0890212	0.0890212	0.0890212	0.0890212	0.0890212	0.0890212	0.0890212	0.0890212	0.0890212	0.0890212	0.0890212	0.0890212	0.0890212	0.0890212	0.0890212	0.0890212	0.0890212	0.0890212	0.0890212	0.0890212	0.0890212	0.0890212	0.0890212	0.0890212	0.0890212	0.0890212	0.0890212	0.0890212	0.0890212	0.0890212	0.0890212	0.0890212
67	clusters	0.100676	0.100676	0.100676	0.100676	0.100676	0.100676	0.100676	0.100676	0.100676	0.100676	0.100676	0.100676	0.100676	0.100676	0.100676	0.100676	0.100676	0.100676	0.100676	0.100676	0.100676	0.100676	0.100676	0.100676	0.100676	0.100676	0.100676	0.100676	0.100676	0.100676	0.100676	0.100676	0.100676	0.100676
68	fret	0.860979	0.85562	0.849196	0.809748	0.85562	0.834236	0.813999	0.819317	0.732754	0.85562	0.898643	0.895404	0.816126	0.871714	0.829969	0.862052	0.849196	0.833169	0.798068	0.498187	0.840643	0.848126	0.780086	0.80231	0.790661	0.859907	0.84278	0.859907	0.801249	0.881393	0.848126	0.92462	0.849196	0.815062
68	states	0.845453	0.845453	0.845453	0.845453	0.845453	0.845453	0.845453	0.845453	0.845453	0.845453	0.845453	0.845453	0.845453	0.845453	0.845453	0.845453	0.845453	0.845453	0.845453	0.845453	0.845453	0.845453	0.845453	0.845453	0.845453	0.845453	0.845453	0.845453	0.845453	0.845453	0.845453	0.845453	0.845453	0.845453
68	clusters	0.894008	0.894008	0.894008	0.894008	0.894008	0.894008	0.894008	0.894008	0.894008	0.894008	0.894008	0.894008	0.894008	0.894008	0.894008	0.894008	0.894008	0.894008	0.894008	0.894008	0.894008	0.894008	0.894008	0.894008	0.894008	0.894008	0.894008	0.894008	0.894008	0.894008	0.894008	0.894008	0.894008	0.894008
69	fret	1.0111	0.838737	0.993663	0.789179	0.80275	0.971715	0.872886	1.03539	0.995244	0.884475	0.990505	0.936425	0.905007	0.753261	0.8947	0.812338	0.880117	0.763795	0.936425	0.91838	0.907967	0.813714	0.890308	1.14384	0.899107	0.859973	0.834532	0.757201	0.785136	0.893234	0.909449	0.781106	0.996828	0.789179	0.888847	0.767768	0.973271	1.00956	0.835932	0.754573	0.896168	0.905007	0.857121	0.80822	0.862832	0.90353	1.0584	0.828947
69	states	0.865696	0.865696	0.865696	0.865696	0.865696	0.865696	0.865696	0.865696	0.865696	0.865696	0.865696	0.865696	0.865696	0.865696	0.865696	0.865696	0.865696	0.865696	0.865696	0.865696	0.865696	0.865696	0.865696	0.865696	0.865696	0.865696	0.865696	0.865696	0.865696	0.865696	0.865696	0.865696	0.865696	0.865696	0.865696	0.865696	0.865696	0.865696	0.865696	0.865696	0.865696	0.865696	0.865696	0.865696	0.865696	0.865696	0.865696	0.865696
69	clusters	0.894008	0.894008	0.894008	0.894008	0.894008	0.894008	0.894008	0.894008	0.894008	0.894008	0.894008	0.894008	0.894008	0.894008	0.894008	0.894008	0.894008	0.894008	0.894008	0.894008	0.894008	0.894008	0.894008	0.894008	0.894008	0.894008	0.894008	0.894008	0.894008	0.894008	0.894008	0.894008	0.894008	0.894008	0.894008	0.894008	0.894008	0.894008	0.894008	0.894008	0.894008	0.894008	0.894008	0.894008	0.894008	0.894008	0.894008	0.894008
70	fret	0.76	1	0.751364	0.8013	0.83534	0.860801	1.00345	0.796919	0.946196	0.81115	0.800207	0.943923	0.788207	0.89764	0.915633	0.847495	0.958719	0.7213	0.940517	0.926924	0.788207	0.844176	0.823225	1.09811	0.799115	0.881966	0.911127	0.943923	1.01038	0.865246	0.782766	0.901007	1.01269	0.887556	0.901007	0.878616	0.888675	0.850817	0.790375	0.885319	0.974719	0.993088	0.778419	0.922403	0.894275	0.887556	0.846388	0.851925
70	states	0.865246	0.865246	0.865246	0.865246	0.865246	0.865246	0.865246	0.865246	0.865246	0.865246	0.865246	0.865246	0.865246	0.865246	0.865246	0.865246	0.865246	0.865246	0.865246	0.865246	0.865246	0.865246	0.865246	0.865246	0.865246	0.865246	0.865246	0.865246	0.865246	0.865246	0.865246	0.865246	0.865246	0.865246	0.865246	0.865246	0.865246	0.865246	0.865246	0.865246	0.865246	0.865246	0.865246	0.865246	0.865246	0.865246	0.865246	0.865246
70	clusters	0.894008	0.894008	0.894008	0.894008	0.894008	0.894008	0.894008	0.894008	0.894008	0.894008	0.894008	0.894008	0.894008	0.894008	0.894008	0.894008	0.894008	0.894008	0.894008	0.894008	0.894008	0.894008	0.894008	0.894008	0.894008	0.894008	0.894008	0.894008	0.894008	0.894008	0.894008	0.894008	0.894008	0.894008	0.894008	0.894008	0.894008	0.894008	0.894008	0.894008	0.894008	0.894008	0.894008	0.894008	0.894008	0.894008	0.894008	0.894008
71	fret	0.898286	0.901155	0.873389	0.878182	0.892547	0.82724	0.861873	0.884889	0.901155	0.910708	0.90211	0.916436	0.898286	0.875307	0.919298	0.87243	0.881057	0.896374	0.882015	0.887762	0.963066	0.920252	0.888719	0.85611	0.934547	0.903066	0.905933	0.885847	0.923112	0.94121	0.882973	0.873389	0.864754	0.869552	0.825311	0.882973	0.912618	0.890633	0.895417	0.882973	0.935499	0.834944	0.903066	0.864754	0.906888	0.859953	0.931689	0.867633
71	states	0.888719	0.888719	0.888719	0.888719	0.888719	0.888719	0.888719	0.888719	0.888719	0.888719	0.888719	0.888719	0.888719	0.888719	0.888719	0.888719	0.888719	0.888719	0.888719	0.888719	0.888719	0.888719	0.888719	0.888719	0.888719	0.888719	0.888719	0.888719	0.888719	0.888719	0.888719	0.888719	0.888719	0.888719	0.888719	0.888719	0.888719	0.888719	0.888719	0.888719	0.888719	0.888719	0.888719	0.888719	0.888719	0.888719	0.888719	0.888719
71	clusters	0.894008	0.894008	0.894008	0.894008	0.894008	0.894008	0.894008	0.894008	0.894008	0.894008	0.894008	0.894008	0.894008	0.894008	0.894008	0.894008	0.894008	0.894008	0.894008	0.894008	0.894008	0.894008	0.894008	0.894008	0.894008	0.894008	0.894008	0.894008	0.894008	0.894008	0.894008	0.894008	0.894008	0.894008	0.894008	0.894008	0.894008	0.894008	0.894008	0.894008	0.894008	0.894008	0.894008	0.894008	0.894008	0.894008	0.894008	0.894008
72	fret	0.827271	0.861386	0.851037	0.832433	0.830368	0.847934	0.879004	0.861386	0.867601	0.857245	0.816955	0.894573	0.852071	0.85828	0.826239	0.864493	0.854141	0.804588	0.89665	0.885229	0.810766	0.893534	0.801499	0.906005	0.843798	0.884191	0.851037	0.879004	0.862422	0.845866	0.912245	0.868637	0.886266	0.859316	0.868637	0.857245	0.879004	0.825207	0.879004	0.859316	0.889381	0.915367	0.883153	0.868637	0.813862	0.853106	0.85828	0.835531
72	states	0.863457	0.863457	0.863457	0.863457	0.863457	0.863457	0.863457	0.863457	0.863457	0.863457	0.863457	0.863457	0.863457	0.863457	0.863457	0.863457	0.863457	0.863457	0.863457	0.863457	0.863457	0.863457	0.863457	0.863457	0.863457	0.863457	0.863457	0.863457	0.863457	0.863457	0.863457	0.863457	0.863457	0.863457	0.863457	0.863457	0.863457	0.863457	0.863457	0.863457	0.863457	0.863457	0.863457	0.863457	0.863457	0.863457	0.863457	0.863457
72	clusters	0.894008	0.894008	0.894008	0.894008	0.894008	0.894008	0.894008	0.894008	0.894008	0.894008	0.894008	0.894008	0.894008	0.894008	0.894008	0.894008	0.894008	0.894008	0.894008	0.894008	0.894008	0.894008	0.894008	0.894008	0.894008	0.894008	0.894008	0.894008	0.894008	0.894008	0.894008	0.894008	0.894008	0.894008	0.894008	0.894008	0.894008	0.894008	0.894008	0.894008	0.894008	0.894008	0.894008	0.894008	0.894008	0.894008	0.894008	0.894008
73	fret	0.0600808	0.0516249	0.0477057	0.0371208	0.434157	0.841847	0.79889	0.828524	0.804362	0.81728	0.855394	0.869173	0.838017	0.822882	0.885211	0.826639	0.873153	0.784484	0.881172	0.881172	0.819143	0.804362	0.766847	0.826639	0.832308	0.824759	0.832308	0.863239	0.822882
73	states	0.825699	0.0516249	0.825699	0.825699	0.825699	0.825699	0.825699	0.825699	0.825699	0.825699	0.825699	0.825699	0.825699	0.825699	0.825699	0.825699	0.825699	0.825699	0.825699	0.825699	0.825699	0.825699	0.825699	0.825699	0.825699	0.825699	0.825699	0.825699	0.825699
73	clusters	0.794605	0.100676	0.794605	0.794605	0.794605	0.794605	0.794605	0.794605	0.794605	0.794605	0.794605	0.794605	0.794605	0.794605	0.794605	0.794605	0.794605	0.794605	0.794605	0.794605	0.794605	0.794605	0.794605	0.794605	0.794605	0.794605	0.794605	0.794605	0.794605
74	fret	0.724021	0.957192	0.850035	0.649214	1.03094	0.734495	0.974713	0.949545	1.11359	0.894153	0.738691	0.909302	0.916892	0.928842	0.993392	0.919063	0.813724	0.803083	0.904969	0.932105	0.90064	0.986792	0.872587	0.858615	0.938638	0.751298	0.700008	0.74289	0.79142	0.97252	0.810532	0.898477	0.886595	0.850035	0.912554	0.458805	0.73974	0.84468	0.909302	0.981298	0.983495	0.896315	0.907135	1.04871	0.816918	0.916892	1.03205	0.909302
74	states	0.899559	0.899559	0.899559	0.899559	0.899559	0.899559	0.899559	0.899559	0.899559	0.899559	0.899559	0.899559	0.899559	0.899559	0.899559	0.899559	0.899559	0.899559	0.899559	0.899559	0.899559	0.899559	0.899559	0.899559	0.899559	0.899559	0.899559	0.899559	0.899559	0.899559	0.899559	0.899559	0.899559	0.899559	0.899559	0.899559	0.899559	0.899559	0.899559	0.899559	0.899559	0.899559	0.899559	0.899559	0.899559	0.899559	0.899559	0.899559
74	clusters	0.894008	0.894008	0.894008	0.894008	0.894008	0.894008	0.894008	0.894008	0.894008	0.894008	0.894008	0.894008	0.894008	0.894008	0.894008	0.894008	0.894008	0.894008	0.894008	0.894008	0.894008	0.894008	0.894008	0.894008	0.894008	0.894008	0.894008	0.894008	0.894008	0.894008	0.894008	0.894008	0.894008	0.894008	0.894008	0.894008	0.894008	0.894008	0.894008	0.894008	0.894008	0.894008	0.894008	0.894008	0.894008	0.894008	0.894008	0.894008
75	fret	0.942091	0.951761	0.905283	0.928542	0.910132	0.937254	0.914979	0.920794	0.930479	0.94596	0.925637
75	states	0.928542	0.928542	0.928542	0.928542	0.928542	0.928542	0.928542	0.928542	0.928542	0.928542	0.928542
75	clusters	0.894008	0.894008	0.894008	0.894008	0.894008	0.894008	0.894008	0.894008	0.894008	0.894008	0.894008
76	fret	0.854376	0.906374	0.86276	0.891743	0.878413
76	states	0.878413	0.878413	0.878413	0.878413	0.878413
76	clusters	0.894008	0.894008	0.894008	0.894008	0.894008
77	fret	0.833571	0.819698	0.823844	0.879003	0.957921	0.819698	0.760409	0.705087	0.781645	0.751232	0.770982	0.716461	0.804611	0.808708	0.797813	0.636642	0.724103	0.671596	0.685128	0.729224	0.720276	0.667932	0.653388	0.697564	0.686366	0.676499	0.664279	0.626001	0.631901	0.770982	0.717731	0.697564	0.72155	0.675272	0.706346	0.646182	0.685128	0.648579	0.713924	0.687605	0.713924	0.742122	0.682657	0.658216	0.685128	0.706346	0.681423	0.720276
77	states	0.860353	0.860353	0.860353	0.860353	0.860353	0.860353	0.69133	0.69133	0.69133	0.69133	0.69133	0.69133	0.860353	0.860353	0.860353	0.69133	0.69133	0.69133	0.69133	0.69133	0.69133	0.69133	0.69133	0.69133	0.69133	0.69133	0.69133	0.69133	0.69133	0.69133	0.69133	0.69133	0.69133	0.69133	0.69133	0.69133	0.69133	0.69133	0.69133	0.69133	0.69133	0.69133	0.69133	0.69133	0.69133	0.69133	0.69133	0.69133
77	clusters	0.894008	0.894008	0.894008	0.894008	0.894008	0.894008	0.794605	0.794605	0.794605	0.794605	0.794605	0.794605	0.894008	0.894008	0.894008	0.794605	0.794605	0.794605	0.794605	0.794605	0.794605	0.794605	0.794605	0.794605	0.794605	0.794605	0.794605	0.794605	0.794605	0.794605	0.794605	0.794605	0.794605	0.794605	0.794605	0.794605	0.794605	0.794605	0.794605	0.794605	0.794605	0.794605	0.794605	0.794605	0.794605	0.794605	0.794605	0.794605
78	fret	0.643639	0.456006	0.614674	0.507272	0.584161	0.458048	0.588798	0.613484	0.579512	0.726154	0.706589	0.631475	0.709183	0.674661	0.647315	0.667135	0.643639	0.658419	0.614674	0.719623	0.604012	0.675921	0.523503	0.673403	0.669638	0.770578	0.544442	0.583005	0.630266	0.707885	0.687321	0.491297	0.728795	0.623041	0.65966	0.646088	0.581818	0.770578	0.584161	0.571482	0.623041	0.735466	0.825352
78	states	0.643639	0.643639	0.643639	0.643639	0.643639	0.643639	0.643639	0.643639	0.643639	0.643639	0.643639	0.643639	0.643639	0.643639	0.643639	0.643639	0.643639	0.643639	0.643639	0.643639	0.643639	0.643639	0.643639	0.643639	0.643639	0.643639	0.643639	0.643639	0.643639	0.643639	0.643639	0.643639	0.643639	0.643639	0.643639	0.643639	0.643639	0.643639	0.643639	0.643639	0.643639	0.643639	0.643639
78	clusters	0.556189	0.556189	0.556189	0.556189	0.556189	0.556189	0.556189	0.556189	0.556189	0.556189	0.556189	0.556189	0.556189	0.556189	0.556189	0.556189	0.556189	0.556189	0.556189	0.556189	0.556189	0.556189	0.556189	0.556189	0.556189	0.556189	0.556189	0.556189	0.556189	0.556189	0.556189	0.556189	0.556189	0.556189	0.556189	0.556189	0.556189	0.556189	0.556189	0.556189	0.556189	0.556189	0.556189
79	fret	0.21841	0.268545	0.116446	0.248108	0.349931	0.375246	0.313379	0.336745	0.319479	0.402524	0.435775	0.428729	0.418659	0.42168	0.481963	0.417651	0.363102	0.326592	0.40555	0.393438	0.423694	0.391418	0.44181	0.370188	0.30931	0.407568	0.389398	0.362089	0.349931	0.449852	0.452866	0.446837	0.423694	0.389398	0.42168	0.454875	0.411602	0.420672	0.366139	0.404542	0.396468	0.440804	0.385356	0.439798	0.45588	0.489977	0.396468	0.433762
79	states	0.149503	0.149503	0.149503	0.149503	0.420672	0.420672	0.420672	0.420672	0.420672	0.420672	0.420672	0.420672	0.420672	0.420672	0.420672	0.420672	0.420672	0.420672	0.420672	0.420672	0.420672	0.420672	0.420672	0.420672	0.420672	0.420672	0.420672	0.420672	0.420672	0.420672	0.420672	0.420672	0.420672	0.420672	0.420672	0.420672	0.420672	0.420672	0.420672	0.420672	0.420672	0.420672	0.420672	0.420672	0.420672	0.420672	0.420672	0.420672
79	clusters	0.100676	0.100676	0.100676	0.100676	0.327982	0.327982	0.327982	0.327982	0.327982	0.327982	0.327982	0.327982	0.327982	0.327982	0.327982	0.327982	0.327982	0.327982	0.327982	0.327982	0.327982	0.327982	0.327982	0.327982	0.327982	0.327982	0.327982	0.327982	0.327982	0.327982	0.327982	0.327982	0.327982	0.327982	0.327982	0.327982	0.327982	0.327982	0.327982	0.327982	0.327982	0.327982	0.327982	0.327982	0.327982	0.327982	0.327982	0.327982
80	fret	0.885566	0.872633	0.896196	0.541011	0.85277
80	states	0.872633	0.872633	0.872633	0.872633	0.872633
80	clusters	0.894008	0.894008	0.894008	0.894008	0.894008
81	fret	0.921582	0.913271	0.940675	0.900262	0.866267	1.00856	0.928726	0.934694	0.902623	0.889666	0.918017	0.976843	1.04442	0.974416	1.04318	0.889666	0.939478	0.935889	1.00735	0.899083	0.88497	1.00365	0.991445	0.916829	0.927534	0.963525	0.897904	0.861612	0.937085	0.912086	0.934694	0.880282	0.897904	0.985351	0.932305	0.901442	0.931112	0.854644	0.984134	0.939478	0.89437	0.985351	0.914456	0.923961	1.01473	0.955084	0.962318	0.94547
81	states	0.908533	0.908533	0.908533	0.908533	0.908533	0.908533	0.908533	0.908533	0.908533	0.908533	0.908533	0.908533	0.908533	0.908533	0.908533	0.908533	0.908533	0.908533	0.908533	0.908533	0.908533	0.908533	0.908533	0.908533	0.908533	0.908533	0.908533	0.908533	0.908533	0.908533	0.908533	0.908533	0.908533	0.908533	0.908533	0.908533	0.908533	0.908533	0.908533	0.908533	0.908533	0.908533	0.908533	0.908533	0.908533	0.908533	0.908533	0.908533
81	clusters	0.894008	0.894008	0.894008	0.894008	0.894008	0.894008	0.894008	0.894008	0.894008	0.894008	0.894008	0.894008	0.894008	0.894008	0.894008	0.894008	0.894008	0.894008	0.894008	0.894008	0.894008	0.894008	0.894008	0.894008	0.894008	0.894008	0.894008	0.894008	0.894008	0.894008	0.894008	0.894008	0.894008	0.894008	0.894008	0.894008	0.894008	0.894008	0.894008	0.894008	0.894008	0.894008	0.894008	0.894008	0.894008	0.894008	0.894008	0.894008
82	fret	1.12687	1.03226	0.99047	1.17127	1.01604	1.03553	1.01604	0.996816	1.12862	0.98258	1.03553	1.04704	1.01927	1.07202	0.99047	1.11122	1.08553	1.0225	0.949943	0.973173	1.04374	1.01114	0.960733	0.970052	1.01114	1.03717	1.07876	1.00793	0.956098	0.995227	1.00793	1.04209	0.956098	0.945346	1.04704	0.979437	0.928626	0.970052	0.970052	1.0225	0.977868	1.01604	0.992054	1.029	1.02731	0.94229	0.988888	0.979437
82	states	1.00793	1.00793	1.00793	1.00793	1.00793	1.00793	1.00793	1.00793	1.00793	1.00793	1.00793	1.00793	1.00793	1.00793	1.00793	1.00793	1.00793	1.00793	1.00793	1.00793	1.00793	1.00793	1.00793	1.00793	1.00793	1.00793	1.00793	1.00793	1.00793	1.00793	1.00793	1.00793	1.00793	1.00793	1.00793	1.00793	1.00793	1.00793	1.00793	1.00793	1.00793	1.00793	1.00793	1.00793	1.00793	1.00793	1.00793	1.00793
82	clusters	0.894008	0.894008	0.894008	0.894008	0.894008	0.894008	0.894008	0.894008	0.894008	0.894008	0.894008	0.894008	0.894008	0.894008	0.894008	0.894008	0.894008	0.894008	0.894008	0.894008	0.894008	0.894008	0.894008	0.894008	0.894008	0.894008	0.894008	0.894008	0.894008	0.894008	0.894008	0.894008	0.894008	0.894008	0.894008	0.894008	0.894008	0.894008	0.894008	0.894008	0.894008	0.894008	0.894008	0.894008	0.894008	0.894008	0.894008	0.894008
83	fret	0.872579	0.840437	0.857678	0.898932	0.836762	0.865115
83	states	0.861397	0.861397	0.861397	0.861397	0.861397	0.861397
83	clusters	0.894008	0.894008	0.894008	0.894008	0.894008	0.894008
84	fret	0.764983	0.709608	0.763395	0.768168	0.867771	0.768168	0.77941	0.659102	0.784273	0.668955	0.781028	0.659102	0.815721	0.687518	0.73838	0.705155	0.614223	0.749233	0.73224	0.744565
84	states	0.746899	0.746899	0.746899	0.746899	0.746899	0.746899	0.746899	0.746899	0.746899	0.746899	0.746899	0.746899	0.746899	0.746899	0.746899	0.746899	0.746899	0.746899	0.746899	0.746899
84	clusters	0.794605	0.794605	0.794605	0.794605	0.794605	0.794605	0.794605	0.794605	0.794605	0.794605	0.794605	0.794605	0.794605	0.794605	0.794605	0.794605	0.794605	0.794605	0.794605	0.794605
85	fret	0.706102	0.794253	0.0765697	0.00748167	0.124456	0.974703	0.807541	0.805118	0.905825	0.742028	0.869153	0.799074	0.947119	0.822145	0.972059	0.909659	0.928945	0.855425	0.867901	0.978676	0.767932	0.86665	1.0765	0.794253	0.684427	0.816046	0.822145	0.801489	0.862901	0.799074	0.71646	0.860406	0.828264	1	0.91222	0.827039	0.876683	0.964149	0.816046	0.719926	0.080503	0.478025	1.02831	1.00668	0.784647	0.846741	0.796662	0.872914
85	states	0.868527	0.868527	0.124456	0.124456	0.124456	0.868527	0.868527	0.868527	0.868527	0.868527	0.868527	0.868527	0.868527	0.868527	0.868527	0.868527	0.868527	0.868527	0.868527	0.868527	0.868527	0.868527	0.868527	0.868527	0.868527	0.868527	0.868527	0.868527	0.868527	0.868527	0.868527	0.868527	0.868527	0.868527	0.868527	0.868527	0.868527	0.868527	0.868527	0.868527	0.124456	0.124456	0.868527	0.868527	0.868527	0.868527	0.868527	0.868527
85	clusters	0.894008	0.894008	0.100676	0.100676	0.100676	0.894008	0.894008	0.894008	0.894008	0.894008	0.894008	0.894008	0.894008	0.894008	0.894008	0.894008	0.894008	0.894008	0.894008	0.894008	0.894008	0.894008	0.894008	0.894008	0.894008	0.894008	0.894008	0.894008	0.894008	0.894008	0.894008	0.894008	0.894008	0.894008	0.894008	0.894008	0.894008	0.894008	0.894008	0.894008	0.100676	0.100676	0.894008	0.894008	0.894008	0.894008	0.894008	0.894008
86	fret	0.971348	0.936992	0.943037	0.87417	1	0.968753	0.891338	0.899113	0.939012	0.94571	0.949705	0.947044	0.866139	0.906122	0.894173	0.951695	0.929546	0.849189	0.0940177
86	states	0.936992	0.936992	0.936992	0.936992	0.936992	0.936992	0.936992	0.936992	0.936992	0.936992	0.936992	0.936992	0.936992	0.936992	0.936992	0.936992	0.936992	0.936992	0.936992
86	clusters	0.894008	0.894008	0.894008	0.894008	0.894008	0.894008	0.894008	0.894008	0.894008	0.894008	0.894008	0.894008	0.894008	0.894008	0.894008	0.894008	0.894008	0.894008	0.894008
87	fret	0.752147	0.730406	0.735211	0.720838	0.799048	0.937534	0.889182	0.866831	0.791551	0.860314	0.786572	0.820483	0.700699	0.792798	0.8091	0.811622	0.769267	0.624904	0.952591	0.729207	0.777896	1.00704	0.800301	0.866831	0.847359	0.736415	0.861616	0.865526	0.677335	0.756991	0.790305
87	states	0.792798	0.792798	0.792798	0.792798	0.792798	0.792798	0.792798	0.792798	0.792798	0.792798	0.792798	0.792798	0.792798	0.792798	0.792798	0.792798	0.792798	0.792798	0.792798	0.792798	0.792798	0.792798	0.792798	0.792798	0.792798	0.792798	0.792798	0.792798	0.792798	0.792798	0.792798
87	clusters	0.794605	0.794605	0.794605	0.794605	0.794605	0.794605	0.794605	0.794605	0.794605	0.794605	0.794605	0.794605	0.794605	0.794605	0.794605	0.794605	0.794605	0.794605	0.794605	0.794605	0.794605	0.794605	0.794605	0.794605	0.794605	0.794605	0.794605	0.794605	0.794605	0.794605	0.794605
88	fret	0.854286	0.834268	0.87554	0.941224	0.935513	0.916165	0.857633	0.761836	0.848714	0.948088	0.887904	0.838706	0.925257	0.865456	0.867694	0.839817	0.919572	0.877784	0.896923	0.877784	0.837596	0.824302	0.905965	0.845375	0.899181	0.910495	0.826514	0.930951	0.829835	0.850941	0.813262	0.922982	0.772714	0.571695	0.835377	0.809956	0.869934	1.03151	0.894666	0.827621	0.908229	0.911628	0.849827	0.899181	0.94351	0.956114	0.814364	0.904834
88	states	0.872175	0.872175	0.872175	0.872175	0.872175	0.872175	0.872175	0.872175	0.872175	0.872175	0.872175	0.872175	0.872175	0.872175	0.872175	0.872175	0.872175	0.872175	0.872175	0.872175	0.872175	0.872175	0.872175	0.872175	0.872175	0.872175	0.872175	0.872175	0.872175	0.872175	0.872175	0.872175	0.872175	0.571695	0.872175	0.872175	0.872175	0.872175	0.872175	0.872175	0.872175	0.872175	0.872175	0.872175	0.872175	0.872175	0.872175	0.872175
88	clusters	0.894008	0.894008	0.894008	0.894008	0.894008	0.894008	0.894008	0.894008	0.894008	0.894008	0.894008	0.894008	0.894008	0.894008	0.894008	0.894008	0.894008	0.894008	0.894008	0.894008	0.894008	0.894008	0.894008	0.894008	0.894008	0.894008	0.894008	0.894008	0.894008	0.894008	0.894008	0.894008	0.894008	0.556189	0.894008	0.894008	0.894008	0.894008	0.894008	0.894008	0.894008	0.894008	0.894008	0.894008	0.894008	0.894008	0.894008	0.894008
89	fret	0.196607	0.222684	0.125173	0.202144	0.186855	0.144151	0.236183	0.116315	0.0771877	0.0741269	0.245542	0.250857	0.108885	0.0999101	0.16569	0.192437	0.186855	0.149931	0.32033	0.224041	0.20903	0.181247	0.23484	0.169952	0.224041	0.111862	0.189649	0.195219	0.238865	0.333982	0.250857	0.177024	0.326556	0.182651	0.213155	0.126643	0.203525	0.236183	0.253519	0.0938908	0.353551	0.230802	0.195219	0.264039	0.335215	0.253519	0.264039	0.292527
89	states	0.224041	0.224041	0.224041	0.224041	0.224041	0.224041	0.224041	0.224041	0.224041	0.224041	0.224041	0.224041	0.224041	0.224041	0.224041	0.224041	0.224041	0.224041	0.224041	0.224041	0.224041	0.224041	0.224041	0.224041	0.224041	0.224041	0.224041	0.224041	0.224041	0.224041	0.224041	0.224041	0.224041	0.224041	0.224041	0.224041	0.224041	0.224041	0.224041	0.224041	0.224041	0.224041	0.224041	0.224041	0.224041	0.224041	0.224041	0.224041
89	clusters	0.327982	0.327982	0.327982	0.327982	0.327982	0.327982	0.327982	0.327982	0.327982	0.327982	0.327982	0.327982	0.327982	0.327982	0.327982	0.327982	0.327982	0.327982	0.327982	0.327982	0.327982	0.327982	0.327982	0.327982	0.327982	0.327982	0.327982	0.327982	0.327982	0.327982	0.327982	0.327982	0.327982	0.327982	0.327982	0.327982	0.327982	0.327982	0.327982	0.327982	0.327982	0.327982	0.327982	0.327982	0.327982	0.327982	0.327982	0.327982
90	fret	0.761726	0.799996	0.817196	0.813728	0.791526	0.781474	0.781474	0.794904	0.838306	0.841875	0.737691	0.803409	0.858121	0.760102	0.722054	0.726713	0.798296	0.783141	0.783141	0.764985	0.776493	0.910681	0.825929	0.834751	0.806834	0.806834	0.796598	0.818936	0.859946	0.843665	0.824175	0.836527	0.841875	0.776493	0.553002
90	states	0.799996	0.799996	0.799996	0.799996	0.799996	0.799996	0.799996	0.799996	0.799996	0.799996	0.799996	0.799996	0.799996	0.799996	0.799996	0.799996	0.799996	0.799996	0.799996	0.799996	0.799996	0.799996	0.799996	0.799996	0.799996	0.799996	0.799996	0.799996	0.799996	0.799996	0.799996	0.799996	0.799996	0.799996	0.799996
90	clusters	0.794605	0.794605	0.794605	0.794605	0.794605	0.794605	0.794605	0.794605	0.794605	0.794605	0.794605	0.794605	0.794605	0.794605	0.794605	0.794605	0.794605	0.794605	0.794605	0.794605	0.794605	0.794605	0.794605	0.794605	0.794605	0.794605	0.794605	0.794605	0.794605	0.794605	0.794605	0.794605	0.794605	0.794605	0.794605
91	fret	0.908176	0.902173	0.886633	0.889018	0.870007	0.911785	0.864096	0.880682	0.900974	0.927484	0.846448	0.902173	0.931121	0.903372	0.880682	0.915399	0.855844	0.920226	0.932334	0.877119	0.862915	0.887825	0.864096	0.890211	0.87119	0.853492	0.883061	0.880682	0.887825	0.883061	0.803454	0.886633	0.865277	0.878306	0.883061	0.870007	0.851141	0.896185	0.915399	0.841763	0.872375	0.922643	0.909378	0.872375	0.839424	0.846448	0.868823	0.906974
91	states	0.881872	0.881872	0.881872	0.881872	0.881872	0.881872	0.881872	0.881872	0.881872	0.881872	0.881872	0.881872	0.881872	0.881872	0.881872	0.881872	0.881872	0.881872	0.881872	0.881872	0.881872	0.881872	0.881872	0.881872	0.881872	0.881872	0.881872	0.881872	0.881872	0.881872	0.881872	0.881872	0.881872	0.881872	0.881872	0.881872	0.881872	0.881872	0.881872	0.881872	0.881872	0.881872	0.881872	0.881872	0.881872	0.881872	0.881872	0.881872
91	clusters	0.894008	0.894008	0.894008	0.894008	0.894008	0.894008	0.894008	0.894008	0.894008	0.894008	0.894008	0.894008	0.894008	0.894008	0.894008	0.894008	0.894008	0.894008	0.894008	0.894008	0.894008	0.894008	0.894008	0.894008	0.894008	0.894008	0.894008	0.894008	0.894008	0.894008	0.894008	0.894008	0.894008	0.894008	0.894008	0.894008	0.894008	0.894008	0.894008	0.894008	0.894008	0.894008	0.894008	0.894008	0.894008	0.894008	0.894008	0.894008
92	fret	0.616736	0.818253	0.498187
92	states	0.616736	0.616736	0.616736
92	clusters	0.556189	0.556189	0.556189
93	fret	0.756119	0.988943	0.840311	0.928959	0.990517	0.933478	0.781322	0.896285	0.867276	0.890431	0.981101	0.827734	0.9365	0.868711	0.981101	1.21023	1.01429	0.976417	0.867276	0.887514	0.899222	0.878802	0.909553	0.867276	0.959383	0.993671	0.784005	0.965552	0.81253	0.853013	0.948655	0.833308	0.749571	0.909553	1.05008	1.05833	0.909553	0.874468	0.777308	0.845941	0.967099	1.00471	0.91252	0.823569	0.848765	0.862981	0.928959	0.884603
93	states	0.873026	0.873026	0.873026	0.873026	0.873026	0.873026	0.873026	0.873026	0.873026	0.873026	0.873026	0.873026	0.873026	0.873026	0.873026	0.873026	0.873026	0.873026	0.873026	0.873026	0.873026	0.873026	0.873026	0.873026	0.873026	0.873026	0.873026	0.873026	0.873026	0.873026	0.873026	0.873026	0.873026	0.873026	0.873026	0.873026	0.873026	0.873026	0.873026	0.873026	0.873026	0.873026	0.873026	0.873026	0.873026	0.873026	0.873026	0.873026
93	clusters	0.894008	0.894008	0.894008	0.894008	0.894008	0.894008	0.894008	0.894008	0.894008	0.894008	0.894008	0.894008	0.894008	0.894008	0.894008	0.894008	0.894008	0.894008	0.894008	0.894008	0.894008	0.894008	0.894008	0.894008	0.894008	0.894008	0.894008	0.894008	0.894008	0.894008	0.894008	0.894008	0.894008	0.894008	0.894008	0.894008	0.894008	0.894008	0.894008	0.894008	0.894008	0.894008	0.894008	0.894008	0.894008	0.894008	0.894008	0.894008
94	fret	0.137062	0.133958	0.138308	0.054242	0.0702353	0.0795474	0.080101	0.0981633	0.08121	0.0729551	0.112169	0.0691518	0.083994	0.102207	0.0423434	0.0563428	0.101048	0.0823217	0.0729551	0.0669923	0.101048	0.0648428	0.0981633	0.0767894	0.0403082	0.0879141	0.173182	0.0884774	0.106278	0.0702353	0.0845528	0.103368	0.175191	0.181943	0.234765	0.112169	0.103368	0.10395	0.0362603	0.0817655	0.0621697	0.0879141	0.0993151	0.0756907	0.0890415	0.0680708	0.0828785	0.0873565
94	states	0.0884774	0.0884774	0.0884774	0.0884774	0.0884774	0.0884774	0.0884774	0.0884774	0.0884774	0.0884774	0.0884774	0.0884774	0.0884774	0.0884774	0.0884774	0.0884774	0.0884774	0.0884774	0.0884774	0.0884774	0.0884774	0.0884774	0.0884774	0.0884774	0.0884774	0.0884774	0.19293	0.0884774	0.0884774	0.0884774	0.0884774	0.0884774	0.19293	0.19293	0.19293	0.0884774	0.0884774	0.0884774	0.0884774	0.0884774	0.0884774	0.0884774	0.0884774	0.0884774	0.0884774	0.0884774	0.0884774	0.0884774
94	clusters	0.100676	0.100676	0.100676	0.100676	0.100676	0.100676	0.100676	0.100676	0.100676	0.100676	0.100676	0.100676	0.100676	0.100676	0.100676	0.100676	0.100676	0.100676	0.100676	0.100676	0.100676	0.100676	0.100676	0.100676	0.100676	0.100676	0.100676	0.100676	0.100676	0.100676	0.100676	0.100676	0.100676	0.100676	0.100676	0.100676	0.100676	0.100676	0.100676	0.100676	0.100676	0.100676	0.100676	0.100676	0.100676	0.100676	0.100676	0.100676
95	fret	0.979036	0.775563	0.89082	0.916726	0.879674	0.816594	0.874932	0.96527	0.982503	0.92991	0.89724	0.816594	0.905318	0.89724	0.9399	0.837721	0.81361	0.846905	0.92991	0.941574	0.860828	0.800284	0.851526	0.856167	0.951669	0.806186	0.848443	0.787123	0.778441	0.795879	0.779883	0.886029	0.944929	0.87021	0.762708	0.725078	0.996479	0.674373	0.553412	0.310011	0.95675	1.01948	0.867074	0.895631	0.854618	0.50426	0.355484	0.815101
95	states	0.887624	0.887624	0.887624	0.887624	0.887624	0.887624	0.887624	0.887624	0.887624	0.887624	0.887624	0.887624	0.887624	0.887624	0.887624	0.887624	0.887624	0.887624	0.887624	0.887624	0.887624	0.887624	0.887624	0.887624	0.887624	0.887624	0.887624	0.887624	0.887624	0.887624	0.887624	0.887624	0.887624	0.887624	0.887624	0.887624	0.887624	0.597455	0.597455	0.597455	0.887624	0.887624	0.887624	0.887624	0.887624	0.597455	0.597455	0.597455
95	clusters	0.894008	0.894008	0.894008	0.894008	0.894008	0.894008	0.894008	0.894008	0.894008	0.894008	0.894008	0.894008	0.894008	0.894008	0.894008	0.894008	0.894008	0.894008	0.894008	0.894008	0.894008	0.894008	0.894008	0.894008	0.894008	0.894008	0.894008	0.894008	0.894008	0.894008	0.894008	0.894008	0.894008	0.894008	0.894008	0.894008	0.894008	0.556189	0.556189	0.556189	0.894008	0.894008	0.894008	0.894008	0.894008	0.556189	0.556189	0.556189
96	fret	0.570841	0.574026	0.612684	0.580412	0.424235	0.580412	0.594327	0.54138
96	states	0.577219	0.577219	0.577219	0.577219	0.577219	0.577219	0.577219	0.577219
96	clusters	0.556189	0.556189	0.556189	0.556189	0.556189	0.556189	0.556189	0.556189
97	fret	0.171426	0.0866654	0.0928376	0.109821	0.118169	0.11366	0.106006
97	states	0.109821	0.109821	0.109821	0.109821	0.109821	0.109821	0.109821
97	clusters	0.100676	0.100676	0.100676	0.100676	0.100676	0.100676	0.100676
98	fret	0.792575	0.774935	1.00722	0.8365	0.930269	0.928581	0.842708	0.885592	0.971579	0.931959	0.795545	0.858388	0.797033	0.930269	1.03834	0.804507	0.976853	0.845825	0.864727	1.02723	1.0036	0.896998	0.847387	1.14965	0.839599	0.789614	0.885592	0.898637	0.812035	0.788136	0.903571	0.819619	0.824196	0.875911	0.780781	0.726569	0.788136	0.770572	0.85681	0.764785	0.691112	0.807511	0.804507	0.764785	0.964586	0.839599	0.782248	0.994616
98	states	0.883163	0.883163	0.883163	0.883163	0.883163	0.883163	0.883163	0.883163	0.883163	0.883163	0.883163	0.883163	0.883163	0.883163	0.883163	0.883163	0.883163	0.883163	0.883163	0.883163	0.883163	0.883163	0.883163	0.883163	0.883163	0.883163	0.883163	0.883163	0.883163	0.883163	0.883163	0.883163	0.883163	0.883163	0.883163	0.883163	0.883163	0.883163	0.883163	0.883163	0.883163	0.883163	0.883163	0.883163	0.883163	0.883163	0.883163	0.883163
98	clusters	0.894008	0.894008	0.894008	0.894008	0.894008	0.894008	0.894008	0.894008	0.894008	0.894008	0.894008	0.894008	0.894008	0.894008	0.894008	0.894008	0.894008	0.894008	0.894008	0.894008	0.894008	0.894008	0.894008	0.894008	0.894008	0.894008	0.894008	0.894008	0.894008	0.894008	0.894008	0.894008	0.894008	0.894008	0.894008	0.894008	0.894008	0.894008	0.894008	0.894008	0.894008	0.894008	0.894008	0.894008	0.894008	0.894008	0.894008	0.894008
99	fret	0.236036	0.194974	0.169724	0.166135	0.208594	0.265604	0.220453	0.211327	0.140256	0.150042	0.162551	0.226859	0.150042	0.204047	0.201322	0.270252	0.18232	0.207684	0.249854	0.216799	0.223197
99	states	0.207684	0.207684	0.207684	0.207684	0.207684	0.207684	0.207684	0.207684	0.207684	0.207684	0.207684	0.207684	0.207684	0.207684	0.207684	0.207684	0.207684	0.207684	0.207684	0.207684	0.207684
99	clusters	0.100676	0.100676	0.100676	0.100676	0.100676	0.100676	0.100676	0.100676	0.100676	0.100676	0.100676	0.100676	0.100676	0.100676	0.100676	0.100676	0.100676	0.100676	0.100676	0.100676	0.100676
100	fret	0.0201896	0.0848281	0.0993463	0.0461968	0.105158	0.0761254	0.100315	0.0974096	0.162458	0.069361	0.139118	0.0442685	0.0568083	0.119701	0.0153795	0.113882	0.474971	0.702674	0.712846	0.749532	0.826308	0.773027	0.815019	0.843776	0.790421	0.747491	0.830416	0.739331	0.791445	0.864358	0.861268	0.54606	0.716917	0.809887	0.833498	0.888068	0.7577	0.782233	0.722007	0.895293	0.77405	0.798615	0.759742	0.864358	0.761785	0.865387	0.821175	0.897358
100	states	0.0974096	0.0974096	0.0974096	0.0974096	0.0974096	0.0974096	0.0974096	0.0974096	0.0974096	0.0974096	0.0974096	0.0974096	0.0974096	0.0974096	0.0974096	0.0974096	0.0974096	0.782233	0.782233	0.782233	0.782233	0.782233	0.782233	0.782233	0.782233	0.782233	0.782233	0.782233	0.782233	0.782233	0.782233	0.782233	0.782233	0.782233	0.782233	0.782233	0.782233	0.782233	0.782233	0.782233	0.782233	0.782233	0.782233	0.782233	0.782233	0.782233	0.782233	0.782233
100	clusters	0.100676	0.100676	0.100676	0.100676	0.100676	0.100676	0.100676	0.100676	0.100676	0.100676	0.100676	0.100676	0.100676	0.100676	0.100676	0.100676	0.100676	0.794605	0.794605	0.794605	0.794605	0.794605	0.794605	0.794605	0.794605	0.794605	0.794605	0.794605	0.794605	0.794605	0.794605	0.794605	0.794605	0.794605	0.794605	0.794605	0.794605	0.794605	0.794605	0.794605	0.794605	0.794605	0.794605	0.794605	0.794605	0.794605	0.794605	0.794605
101	fret	0.458913	0.545719	0.524475	0.552919	0.529136	0.494893	0.676555	0.508421	0.628781	0.441045	0.53977	0.527968	0.514129	0.505016	0.544526	0.472879	0.472879	0.53977	0.533826	0.537403	0.542144	0.410558	0.459978	0.455728	0.427674	0.435873	0.519882	0.538586	0.383244	0.427674	0.463182	0.44835	0.496011	0.537403	0.431762	0.518728	0.471795	0.620863	0.458913	0.453612	0.494893	0.5005	0.45045	0.508421	0.542144	0.523354	0.479415	0.464253
101	states	0.5005	0.5005	0.5005	0.5005	0.5005	0.5005	0.5005	0.5005	0.5005	0.5005	0.5005	0.5005	0.5005	0.5005	0.5005	0.5005	0.5005	0.5005	0.5005	0.5005	0.5005	0.5005	0.5005	0.5005	0.5005	0.5005	0.5005	0.5005	0.5005	0.5005	0.5005	0.5005	0.5005	0.5005	0.5005	0.5005	0.5005	0.5005	0.5005	0.5005	0.5005	0.5005	0.5005	0.5005	0.5005	0.5005	0.5005	0.5005
101	clusters	0.556189	0.556189	0.556189	0.556189	0.556189	0.556189	0.556189	0.556189	0.556189	0.556189	0.556189	0.556189	0.556189	0.556189	0.556189	0.556189	0.556189	0.556189	0.556189	0.556189	0.556189	0.556189	0.556189	0.556189	0.556189	0.556189	0.556189	0.556189	0.556189	0.556189	0.556189	0.556189	0.556189	0.556189	0.556189	0.556189	0.556189	0.556189	0.556189	0.556189	0.556189	0.556189	0.556189	0.556189	0.556189	0.556189	0.556189	0.556189
102	fret	0.384397	0.254009	0.350894	0.33007	0.31223
102	states	0.33007	0.33007	0.33007	0.33007	0.33007
102	clusters	0.327982	0.327982	0.327982	0.327982	0.327982
103	fret	0.87718	0.874446	0.975222	0.857996	0.870797	0.872622	0.887191	0.80729	0.895361	0.870797	0.901704	0.858912	0.829499	0.852498	0.874446	0.882644	0.90894	0.766237	0.837795	0.889008	0.903514	0.879913	0.871709	0.872622	0.868057	0.909844	0.879003	0.92607	0.596558	0.936849	0.811001	0.967223	0.931463	0.90894	0.92247	0.878092	0.913455	0.841476	0.918867	0.852498	0.951173	0.901704	0.863488	0.632636	0.55023	0.912553	0.910747	0.887191
103	states	0.913455	0.913455	0.913455	0.913455	0.913455	0.913455	0.913455	0.913455	0.913455	0.913455	0.913455	0.913455	0.913455	0.913455	0.913455	0.913455	0.913455	0.913455	0.913455	0.913455	0.913455	0.913455	0.913455	0.913455	0.913455	0.913455	0.913455	0.913455	0.12621	0.913455	0.913455	0.913455	0.913455	0.913455	0.913455	0.913455	0.913455	0.913455	0.913455	0.913455	0.913455	0.913455	0.913455	0.12621	0.12621	0.913455	0.913455	0.913455
103	clusters	0.894008	0.894008	0.894008	0.894008	0.894008	0.894008	0.894008	0.894008	0.894008	0.894008	0.894008	0.894008	0.894008	0.894008	0.894008	0.894008	0.894008	0.894008	0.894008	0.894008	0.894008	0.894008	0.894008	0.894008	0.894008	0.894008	0.894008	0.894008	0.100676	0.894008	0.894008	0.894008	0.894008	0.894008	0.894008	0.894008	0.894008	0.894008	0.894008	0.894008	0.894008	0.894008	0.894008	0.100676	0.100676	0.894008	0.894008	0.894008
104	fret	0.250212	0.223128	0.393009	0.545134	0.423971	0.232902	0.414711	0.365952	0.242649	0.341843	0.308023	0.400258	0.364907	0.281375	0.303773	0.533207	0.450585	0.376383	0.368041	0.397153	0.282445	0.383667	0.329198	0.283514	0.421916	0.335526	0.341843	0.51724	0.415741	0.375342	0.530219	0.319685	0.295257	0.114951	0.337633	0.359679	0.401292	0.316513	0.420887	0.273878	0.237237	0.138405	0.264216	0.37743	0.405427	0.180465	0.241568	0.372215
104	states	0.346047	0.346047	0.346047	0.450585	0.450585	0.450585	0.450585	0.450585	0.346047	0.346047	0.346047	0.346047	0.346047	0.346047	0.346047	0.450585	0.450585	0.450585	0.450585	0.346047	0.346047	0.346047	0.346047	0.346047	0.346047	0.450585	0.450585	0.450585	0.450585	0.450585	0.450585	0.346047	0.346047	0.152848	0.346047	0.346047	0.346047	0.346047	0.346047	0.346047	0.152848	0.152848	0.346047	0.346047	0.346047	0.346047	0.152848	0.346047
104	clusters	0.327982	0.327982	0.327982	0.556189	0.556189	0.556189	0.556189	0.556189	0.327982	0.327982	0.327982	0.327982	0.327982	0.327982	0.327982	0.556189	0.556189	0.556189	0.556189	0.327982	0.327982	0.327982	0.327982	0.327982	0.327982	0.556189	0.556189	0.556189	0.556189	0.556189	0.556189	0.327982	0.327982	0.100676	0.327982	0.327982	0.327982	0.327982	0.327982	0.327982	0.100676	0.100676	0.327982	0.327982	0.327982	0.327982	0.100676	0.327982
105	fret	0.62394	0.429326	0.571989	0.561097	0.506031	0.515398	0.576904	0.60403	0.594419	0.663591	0.568041	0.362713	0.501844	0.600196	0.491306	0.558108	0.623	0.478531	0.593454	0.476388	0.515398	0.558108	0.548086	0.531861	0.533902	0.486	0.483871	0.506031	0.49764	0.584723	0.728513	0.616398	0.456919	0.412453	0.616398	0.483871	0.620176	0.532882	0.46236	0.589582	0.516434	0.481738	0.499744	0.561097	0.631429	0.506031	0.540003	0.605942
105	states	0.527768	0.527768	0.527768	0.527768	0.527768	0.527768	0.527768	0.527768	0.527768	0.527768	0.527768	0.527768	0.527768	0.527768	0.527768	0.527768	0.527768	0.527768	0.527768	0.527768	0.527768	0.527768	0.527768	0.527768	0.527768	0.527768	0.527768	0.527768	0.527768	0.527768	0.527768	0.527768	0.527768	0.527768	0.527768	0.527768	0.527768	0.527768	0.527768	0.527768	0.527768	0.527768	0.527768	0.527768	0.527768	0.527768	0.527768	0.527768
105	clusters	0.556189	0.556189	0.556189	0.556189	0.556189	0.556189	0.556189	0.556189	0.556189	0.556189	0.556189	0.556189	0.556189	0.556189	0.556189	0.556189	0.556189	0.556189	0.556189	0.556189	0.556189	0.556189	0.556189	0.556189	0.556189	0.556189	0.556189	0.556189	0.556189	0.556189	0.556189	0.556189	0.556189	0.556189	0.556189	0.556189	0.556189	0.556189	0.556189	0.556189	0.556189	0.556189	0.556189	0.556189	0.556189	0.556189	0.556189	0.556189
106	fret	0.811918	0.857807	0.808248	0.893313	0.898441	0.844044	0.802147	0.831621	0.883099	0.993237	0.958452	0.975765	0.958452	0.867882	0.867882	0.842798	0.831621	0.811918	0.856552	0.922996	0.933432	0.851538	0.985153	0.897158	0.895875	0.869145	0.825441	0.895875	0.978442	0.851538	0.820512	0.874207	0.942611	0.79364	0.83658	0.832859	0.874207	0.974427	0.861579	0.816824	0.929511	0.878012	0.870409	0.842798	0.93605	0.865358	0.947877	0.929511
106	states	0.878012	0.878012	0.878012	0.878012	0.878012	0.878012	0.878012	0.878012	0.878012	0.878012	0.878012	0.878012	0.878012	0.878012	0.878012	0.878012	0.878012	0.878012	0.878012	0.878012	0.878012	0.878012	0.878012	0.878012	0.878012	0.878012	0.878012	0.878012	0.878012	0.878012	0.878012	0.878012	0.878012	0.878012	0.878012	0.878012	0.878012	0.878012	0.878012	0.878012	0.878012	0.878012	0.878012	0.878012	0.878012	0.878012	0.878012	0.878012
106	clusters	0.894008	0.894008	0.894008	0.894008	0.894008	0.894008	0.894008	0.894008	0.894008	0.894008	0.894008	0.894008	0.894008	0.894008	0.894008	0.894008	0.894008	0.894008	0.894008	0.894008	0.894008	0.894008	0.894008	0.894008	0.894008	0.894008	0.894008	0.894008	0.894008	0.894008	0.894008	0.894008	0.894008	0.894008	0.894008	0.894008	0.894008	0.894008	0.894008	0.894008	0.894008	0.894008	0.894008	0.894008	0.894008	0.894008	0.894008	0.894008
107	fret	0.825583	0.844219	0.888423	0.893983	0.890646	0.887311	0.893983	0.870682	0.901781	0.860737	0.934251	0.858531	0.824489	0.859634	0.900666	0.900666	0.848617	0.924146	0.926389	0.899551	0.880651	0.919663	0.864049	0.905128	0.923025	0.898437	0.824489
107	states	0.890646	0.890646	0.890646	0.890646	0.890646	0.890646	0.890646	0.890646	0.890646	0.890646	0.890646	0.890646	0.890646	0.890646	0.890646	0.890646	0.890646	0.890646	0.890646	0.890646	0.890646	0.890646	0.890646	0.890646	0.890646	0.890646	0.890646
107	clusters	0.894008	0.894008	0.894008	0.894008	0.894008	0.894008	0.894008	0.894008	0.894008	0.894008	0.894008	0.894008	0.894008	0.894008	0.894008	0.894008	0.894008	0.894008	0.894008	0.894008	0.894008	0.894008	0.894008	0.894008	0.894008	0.894008	0.894008
108	fret	0.916882	0.908123	0.944652	0.929459	0.8309	0.878366	0.875905	0.882062	0.898157	0.908123	0.909372	0.903134	0.918137	0.858761	0.908123	0.90438	0.882062	0.838132	0.862423	0.914376	0.88453	0.866091
108	states	0.900645	0.900645	0.900645	0.900645	0.900645	0.900645	0.900645	0.900645	0.900645	0.900645	0.900645	0.900645	0.900645	0.900645	0.900645	0.900645	0.900645	0.900645	0.900645	0.900645	0.900645	0.900645
108	clusters	0.894008	0.894008	0.894008	0.894008	0.894008	0.894008	0.894008	0.894008	0.894008	0.894008	0.894008	0.894008	0.894008	0.894008	0.894008	0.894008	0.894008	0.894008	0.894008	0.894008	0.894008	0.894008
109	fret	1.00643	0.954837	0.916766	0.991732	0.979768	0.989893	0.990812	0.927005	0.962235	1.04298	1.02382	0.949281	1.0293	0.959462	0.970547	0.960386
109	states	0.975157	0.975157	0.975157	0.975157	0.975157	0.975157	0.975157	0.975157	0.975157	0.975157	0.975157	0.975157	0.975157	0.975157	0.975157	0.975157
109	clusters	0.894008	0.894008	0.894008	0.894008	0.894008	0.894008	0.894008	0.894008	0.894008	0.894008	0.894008	0.894008	0.894008	0.894008	0.894008	0.894008
110	fret	0.826674	0.921641	0.915249	0.879834	0.907606	0.908878	0.93965	0.892409	0.859883	0.912698	0.858642	0.937067	0.893671	0.921641	0.948716	0.851218	0.868586	0.859883	0.852453	0.819372	0.883598	0.831558	0.881088	0.888628	0.919082	0.878581	0.938358	0.897461	0.902527	0.887369	0.868586	0.887369	0.85369	0.856164	0.915249	0.917803	0.881088	0.884854	0.91015	0.934488	0.920361	0.952614	0.905065	0.872328	0.881088	0.925486	0.894933	0.950015
110	states	0.888628	0.888628	0.888628	0.888628	0.888628	0.888628	0.888628	0.888628	0.888628	0.888628	0.888628	0.888628	0.888628	0.888628	0.888628	0.888628	0.888628	0.888628	0.888628	0.888628	0.888628	0.888628	0.888628	0.888628	0.888628	0.888628	0.888628	0.888628	0.888628	0.888628	0.888628	0.888628	0.888628	0.888628	0.888628	0.888628	0.888628	0.888628	0.888628	0.888628	0.888628	0.888628	0.888628	0.888628	0.888628	0.888628	0.888628	0.888628
110	clusters	0.894008	0.894008	0.894008	0.894008	0.894008	0.894008	0.894008	0.894008	0.894008	0.894008	0.894008	0.894008	0.894008	0.894008	0.894008	0.894008	0.894008	0.894008	0.894008	0.894008	0.894008	0.894008	0.894008	0.894008	0.894008	0.894008	0.894008	0.894008	0.894008	0.894008	0.894008	0.894008	0.894008	0.894008	0.894008	0.894008	0.894008	0.894008	0.894008	0.894008	0.894008	0.894008	0.894008	0.894008	0.894008	0.894008	0.894008	0.894008
111	fret	0.544182	0.468163	0.411665	0.391386	0.208537	0.143829	0.668574	0.285075	0.402546	0.329207	0.412677	0.454077	0.389355	0.339434	0.319991	0.407613	0.738752	0.845684	0.708621	0.803478	0.493252	0.581914	0.551146	0.655833	0.699844	0.858109	0.815973	0.679337	0.839943	0.80444	0.688133	0.762002	0.541195	0.778427	0.825575	0.860973	0.847597	0.851421	1.1686	0.897161	0.799629	0.951116	0.920873	0.522254	0.539204	0.86956	0.966191	0.947342
111	states	0.626842	0.403053	0.403053	0.403053	0.403053	0.403053	0.626842	0.403053	0.403053	0.403053	0.403053	0.403053	0.403053	0.403053	0.403053	0.403053	0.813091	0.813091	0.813091	0.813091	0.626842	0.626842	0.626842	0.626842	0.813091	0.813091	0.813091	0.813091	0.813091	0.813091	0.813091	0.813091	0.626842	0.813091	0.813091	0.813091	0.813091	0.813091	0.813091	0.813091	0.813091	0.813091	0.813091	0.626842	0.626842	0.813091	0.813091	0.813091
111	clusters	0.556189	0.327982	0.327982	0.327982	0.327982	0.327982	0.556189	0.327982	0.327982	0.327982	0.327982	0.327982	0.327982	0.327982	0.327982	0.327982	0.794605	0.794605	0.794605	0.794605	0.556189	0.556189	0.556189	0.556189	0.794605	0.794605	0.794605	0.794605	0.794605	0.794605	0.794605	0.794605	0.556189	0.794605	0.794605	0.794605	0.794605	0.794605	0.794605	0.794605	0.794605	0.794605	0.794605	0.556189	0.556189	0.794605	0.794605	0.794605
112	fret	0.852872	0.743697	0.688138	0.748873	0.781718	0.807262	0.868439	0.858512	0.862757	1.00781	0.86134	0.903056	0.874146	0.877009	0.582989	0.0291385	0.48237	0.852872	0.791069	0.973566	0.833326	0.86134	0.984389	0.812705	0.855689	0.903056	0.897224	0.827794	0.913326	0.885634	0.864175	0.878442	0.897224	0.862757	0.875576	0.881314	0.859925	0.843062	0.868439	0.908915	0.859925	0.944616	0.862757	0.773757	0.879878	0.889968	0.811342	0.81407
112	states	0.8571	0.8571	0.532679	0.8571	0.8571	0.8571	0.8571	0.8571	0.8571	0.8571	0.8571	0.8571	0.8571	0.8571	0.532679	0.532679	0.532679	0.8571	0.8571	0.8571	0.8571	0.8571	0.8571	0.8571	0.8571	0.8571	0.8571	0.8571	0.8571	0.8571	0.8571	0.8571	0.8571	0.8571	0.8571	0.8571	0.8571	0.8571	0.8571	0.8571	0.8571	0.8571	0.8571	0.8571	0.8571	0.8571	0.8571	0.8571
112	clusters	0.894008	0.894008	0.556189	0.894008	0.894008	0.894008	0.894008	0.894008	0.894008	0.894008	0.894008	0.894008	0.894008	0.894008	0.556189	0.556189	0.556189	0.894008	0.894008	0.894008	0.894008	0.894008	0.894008	0.894008	0.894008	0.894008	0.894008	0.894008	0.894008	0.894008	0.894008	0.894008	0.894008	0.894008	0.894008	0.894008	0.894008	0.894008	0.894008	0.894008	0.894008	0.894008	0.894008	0.894008	0.894008	0.894008	0.894008	0.894008
113	fret	0.711926	0.734053	0.850296	0.74335	0.800481	0.767493	0.813093	0.782498	0.847393	0.894695	0.818742	0.719701	0.683863	0.796307	0.754018	0.815914	0.885685	0.724915	0.820158	0.760736	0.789382	0.723609	0.775654	0.590864	0.744678	0.896204	0.811685	0.742023	0.813093	0.393155	0.840166	0.697807	0.869337	0.948603	0.820158	0.888681	0.767493	0.807471	0.771566	0.811685	0.88419	0.900739	0.793532	0.827266	0.788002	0.796307	0.731423	0.939194
113	states	0.796307	0.796307	0.796307	0.796307	0.796307	0.796307	0.796307	0.796307	0.796307	0.796307	0.796307	0.796307	0.796307	0.796307	0.796307	0.796307	0.796307	0.796307	0.796307	0.796307	0.796307	0.796307	0.796307	0.49201	0.796307	0.796307	0.796307	0.796307	0.796307	0.49201	0.796307	0.796307	0.796307	0.796307	0.796307	0.796307	0.796307	0.796307	0.796307	0.796307	0.796307	0.796307	0.796307	0.796307	0.796307	0.796307	0.796307	0.796307
113	clusters	0.794605	0.794605	0.794605	0.794605	0.794605	0.794605	0.794605	0.794605	0.794605	0.794605	0.794605	0.794605	0.794605	0.794605	0.794605	0.794605	0.794605	0.794605	0.794605	0.794605	0.794605	0.794605	0.794605	0.556189	0.794605	0.794605	0.794605	0.794605	0.794605	0.556189	0.794605	0.794605	0.794605	0.794605	0.794605	0.794605	0.794605	0.794605	0.794605	0.794605	0.794605	0.794605	0.794605	0.794605	0.794605	0.794605	0.794605	0.794605
114	fret	1.0753	1.00976	1.24407	1.30846	0.961294	1.11308	1	1.12324
114	states	1.09419	1.09419	1.09419	1.09419	1.09419	1.09419	1.09419	1.09419
114	clusters	0.894008	0.894008	0.894008	0.894008	0.894008	0.894008	0.894008	0.894008
115	fret	0.447849	0.481734	0.452823	0.59031	0.644122	0.56404	0.486729	0.583229
115	states	0.525385	0.525385	0.525385	0.525385	0.525385	0.525385	0.525385	0.525385
115	clusters	0.556189	0.556189	0.556189	0.556189	0.556189	0.556189	0.556189	0.556189
116	fret	0.377603	0.169928	0.316643	0.276793	0.227767	0.222495	0.229082	0.231707	0.278058	0.377603	0.338508	0.442267	0.330051	0.230395	0.334891	0.330051	0.344513	0.267904	0.424469	0.37995	0.300608	0.235635	0.451087	0.303088	0.370588	0.362352	0.343314	0.293136	0.296878	0.242155	0.396112	0.295632	0.211885	0.221173	0.317868	0.331263	0.285634	0.423348	0.301849	0.356434	0.27045	0.35287	0.443371	0.234327	0.361171	0.219851	0.338508	0.27426
116	states	0.371174	0.27426	0.27426	0.27426	0.27426	0.27426	0.27426	0.27426	0.27426	0.371174	0.27426	0.371174	0.371174	0.27426	0.371174	0.27426	0.371174	0.27426	0.371174	0.371174	0.27426	0.27426	0.371174	0.27426	0.371174	0.371174	0.371174	0.27426	0.27426	0.27426	0.371174	0.27426	0.27426	0.27426	0.27426	0.371174	0.27426	0.371174	0.27426	0.371174	0.27426	0.371174	0.371174	0.27426	0.371174	0.27426	0.27426	0.27426
116	clusters	0.327982	0.327982	0.327982	0.327982	0.327982	0.327982	0.327982	0.327982	0.327982	0.327982	0.327982	0.327982	0.327982	0.327982	0.327982	0.327982	0.327982	0.327982	0.327982	0.327982	0.327982	0.327982	0.327982	0.327982	0.327982	0.327982	0.327982	0.327982	0.327982	0.327982	0.327982	0.327982	0.327982	0.327982	0.327982	0.327982	0.327982	0.327982	0.327982	0.327982	0.327982	0.327982	0.327982	0.327982	0.327982	0.327982	0.327982	0.327982
117	fret	0.430124	0.485958	0.425151	0.435099	0.42018	0.39238	0.462996	0.453026	0.412231	0.383457	0.43709	0.399322	0.37157
117	states	0.425151	0.425151	0.425151	0.425151	0.425151	0.425151	0.425151	0.425151	0.425151	0.425151	0.425151	0.425151	0.425151
117	clusters	0.327982	0.327982	0.327982	0.327982	0.327982	0.327982	0.327982	0.327982	0.327982	0.327982	0.327982	0.327982	0.327982
118	fret	0.374429	0.799221	0.364489	0.376417	0.434165	0.377411	0.334698	0.381389	0.490072	0.332714	0.347602	0.101811	-0.0614327	0.0812127	0.237676	0.592286	0.660704	0.225827	0.368464	0.316844	0.315853	0.386362	0.294053	0.314861	0.181451	0.167664	0.419215	0.463098	0.469089	0.360514	0.401288	0.307923	0.385367	0.449125	0.325769	0.389347	0.431174	0.361508	0.442142	0.337676	0.427187	0.513077	0.381389	0.417222	0.555151	0.34363	0.523087	0.437156
118	states	0.374429	0.513077	0.374429	0.374429	0.374429	0.374429	0.374429	0.374429	0.374429	0.374429	0.167664	0.167664	0.167664	0.167664	0.167664	0.513077	0.513077	0.374429	0.374429	0.374429	0.374429	0.374429	0.374429	0.374429	0.167664	0.167664	0.513077	0.513077	0.374429	0.374429	0.374429	0.374429	0.374429	0.374429	0.374429	0.374429	0.374429	0.374429	0.374429	0.374429	0.513077	0.513077	0.374429	0.374429	0.513077	0.374429	0.513077	0.374429
118	clusters	0.327982	0.556189	0.327982	0.327982	0.327982	0.327982	0.327982	0.327982	0.327982	0.327982	0.100676	0.100676	0.100676	0.100676	0.100676	0.556189	0.556189	0.327982	0.327982	0.327982	0.327982	0.327982	0.327982	0.327982	0.100676	0.100676	0.556189	0.556189	0.327982	0.327982	0.327982	0.327982	0.327982	0.327982	0.327982	0.327982	0.327982	0.327982	0.327982	0.327982	0.556189	0.556189	0.327982	0.327982	0.556189	0.327982	0.556189	0.327982
119	fret	0.966707	0.921078	0.892408	0.992365	0.942973	1.01999	0.888158	0.881103	0.827285	0.824582	0.944444	1.04351	1.08025	1.08025	1.10966	0.812483	0.88392	0.956274	0.664494	0.895248
119	states	0.932025	0.932025	0.932025	0.932025	0.932025	0.932025	0.932025	0.932025	0.932025	0.932025	0.932025	0.932025	0.932025	0.932025	0.932025	0.932025	0.932025	0.932025	0.932025	0.932025
119	clusters	0.894008	0.894008	0.894008	0.894008	0.894008	0.894008	0.894008	0.894008	0.894008	0.894008	0.894008	0.894008	0.894008	0.894008	0.894008	0.894008	0.894008	0.894008	0.894008	0.894008
120	fret	0.794589	0.956256	0.801386	1.12459	0.868568	0.857121	0.831736	0.819232	0.705691	0.804115	0.81647	0.890308	0.899107	0.694398	0.779766	0.831736	0.78783	0.749334	0.974829	0.930382	0.680738	0.748028	0.795946	0.786482	0.842956	0.859973	0.790529	0.686927	0.742817	0.93189	0.865696	0.858546	0.758517	0.88593	0.827554	0.910934	0.80685	0.912419	0.766442	0.823386	0.80275	0.871445	0.679503	0.9334	0.870006	0.868568	0.864263	0.890308
120	states	0.804115	0.804115	0.804115	0.804115	0.804115	0.804115	0.804115	0.804115	0.804115	0.804115	0.804115	0.804115	0.804115	0.804115	0.804115	0.804115	0.804115	0.804115	0.804115	0.804115	0.804115	0.804115	0.804115	0.804115	0.804115	0.804115	0.804115	0.804115	0.804115	0.804115	0.804115	0.804115	0.804115	0.804115	0.804115	0.804115	0.804115	0.804115	0.804115	0.804115	0.804115	0.804115	0.804115	0.804115	0.804115	0.804115	0.804115	0.804115
120	clusters	0.794605	0.794605	0.794605	0.794605	0.794605	0.794605	0.794605	0.794605	0.794605	0.794605	0.794605	0.794605	0.794605	0.794605	0.794605	0.794605	0.794605	0.794605	0.794605	0.794605	0.794605	0.794605	0.794605	0.794605	0.794605	0.794605	0.794605	0.794605	0.794605	0.794605	0.794605	0.794605	0.794605	0.794605	0.794605	0.794605	0.794605	0.794605	0.794605	0.794605	0.794605	0.794605	0.794605	0.794605	0.794605	0.794605	0.794605	0.794605
121	fret	0.892516	0.918702	0.876682	0.896022	0.90302	0.0703878	0	0.108442	0.0412495	0.00710949	0.293098	0.933431	0.904767	0.910873	0.822338	0.897773	0.929972	0.895146	0.937748	0.864304	0.824137	0.937748	0.830423	0.823237	0.873151	0.889883	0.9455	0.899523	0.86519	0.896022	0.880209	0.920439	0.896022	0.921307	0.317833	0.867847	0.929107	0.912615	0.891638	0.934295	0.916095	0.943779	0.735528	0.013022	0.0541035	-0.0333888	0.0576001	0.178708
121	states	0.896022	0.896022	0.896022	0.896022	0.896022	0.050604	0.050604	0.050604	0.050604	0.050604	0.050604	0.896022	0.896022	0.896022	0.896022	0.896022	0.896022	0.896022	0.896022	0.896022	0.896022	0.896022	0.896022	0.896022	0.896022	0.896022	0.896022	0.896022	0.896022	0.896022	0.896022	0.896022	0.896022	0.896022	0.317833	0.896022	0.896022	0.896022	0.896022	0.896022	0.896022	0.896022	0.896022	0.050604	0.050604	0.050604	0.050604	0.050604
121	clusters	0.894008	0.894008	0.894008	0.894008	0.894008	0.100676	0.100676	0.100676	0.100676	0.100676	0.100676	0.894008	0.894008	0.894008	0.894008	0.894008	0.894008	0.894008	0.894008	0.894008	0.894008	0.894008	0.894008	0.894008	0.894008	0.894008	0.894008	0.894008	0.894008	0.894008	0.894008	0.894008	0.894008	0.894008	0.327982	0.894008	0.894008	0.894008	0.894008	0.894008	0.894008	0.894008	0.894008	0.100676	0.100676	0.100676	0.100676	0.100676
122	fret	0.919154	0.827999	0.908644	0.851933	0.885223	0.88006	0.890401	0.917837	0.835522	0.86594	0.843077	0.873628	0.88264	0.907335	0.908644	0.871062	0.868499	0.839295	0.86594	0.913891	0.850665	0.82425	0.855742	0.86978	0.900803	0.906027	0.931051	0.853201	0.902107	0.874913	0.867219	0.885223	0.900803	0.841815	0.806861
122	states	0.873628	0.873628	0.873628	0.873628	0.873628	0.873628	0.873628	0.873628	0.873628	0.873628	0.873628	0.873628	0.873628	0.873628	0.873628	0.873628	0.873628	0.873628	0.873628	0.873628	0.873628	0.873628	0.873628	0.873628	0.873628	0.873628	0.873628	0.873628	0.873628	0.873628	0.873628	0.873628	0.873628	0.873628	0.873628
122	clusters	0.894008	0.894008	0.894008	0.894008	0.894008	0.894008	0.894008	0.894008	0.894008	0.894008	0.894008	0.894008	0.894008	0.894008	0.894008	0.894008	0.894008	0.894008	0.894008	0.894008	0.894008	0.894008	0.894008	0.894008	0.894008	0.894008	0.894008	0.894008	0.894008	0.894008	0.894008	0.894008	0.894008	0.894008	0.894008
123	fret	0.154356	0.16853	0.0904838	0.158407	0.374244	0.223133	0.406374	0.261492	0.330004	0.299799	0.28166	0.297784	0.315912	0.277628	0.260484	0.295769	0.455501	0.324972	0.183708	0.144228
123	states	0.156381	0.156381	0.156381	0.156381	0.298792	0.298792	0.298792	0.298792	0.298792	0.298792	0.298792	0.298792	0.298792	0.298792	0.298792	0.298792	0.298792	0.298792	0.156381	0.156381
123	clusters	0.100676	0.100676	0.100676	0.100676	0.327982	0.327982	0.327982	0.327982	0.327982	0.327982	0.327982	0.327982	0.327982	0.327982	0.327982	0.327982	0.327982	0.327982	0.100676	0.100676
124	fret	0.854931	0.818088	0.866551	0.927083	0.87925	0.912166	0.929216	0.908974	0.87184	0.88879	0.87184	0.849655	0.659337	0.87184	0.867608	0.872898	0.873956	0.865494	0.920686	0.85282	0.869724	0.870782	0.875015	0.91749	0.896219	0.894096	0.872898	0.930283	0.848601	0.887729	0.87925	0.870782	0.833854	0.896219	0.877132	0.914295	0.88879	0.883489	0.91323	0.931351	0.900468	0.855986	0.897281	0.903656	0.902593	0.911102	0.450348	0.636814
124	states	0.878191	0.878191	0.878191	0.878191	0.878191	0.878191	0.878191	0.878191	0.878191	0.878191	0.878191	0.878191	0.636814	0.878191	0.878191	0.878191	0.878191	0.878191	0.878191	0.878191	0.878191	0.878191	0.878191	0.878191	0.878191	0.878191	0.878191	0.878191	0.878191	0.878191	0.878191	0.878191	0.878191	0.878191	0.878191	0.878191	0.878191	0.878191	0.878191	0.878191	0.878191	0.878191	0.878191	0.878191	0.878191	0.878191	0.636814	0.636814
124	clusters	0.894008	0.894008	0.894008	0.894008	0.894008	0.894008	0.894008	0.894008	0.894008	0.894008	0.894008	0.894008	0.556189	0.894008	0.894008	0.894008	0.894008	0.894008	0.894008	0.894008	0.894008	0.894008	0.894008	0.894008	0.894008	0.894008	0.894008	0.894008	0.894008	0.894008	0.894008	0.894008	0.894008	0.894008	0.894008	0.894008	0.894008	0.894008	0.894008	0.894008	0.894008	0.894008	0.894008	0.894008	0.894008	0.894008	0.556189	0.556189
125	fret	0.769252	0.867987	0.903339	0.858005
125	states	0.862996	0.862996	0.862996	0.862996
125	clusters	0.894008	0.894008	0.894008	0.894008
126	fret	0.989956	0.934488	0.981066	0.941204	0.920897	0.986792	0.964955	1.00745	0.943876	0.927039	0.947204	0.990587	0.894475	0.984888	0.928399	0.970791	0.938524	0.987425	0.88881	0.943209	0.964304	0.984888	0.915401	0.904303	0.939865	0.945209	1.06245	0.864322	0.89659	1.02761	0.902206	1.02398	0.9975	0.931787	0.876686	1.03721	0.969497	0.982979	0.972082	0.854779	0.960389	0.940535	0.910563	0.970791	1.05898	0.570293	0.154005	0.0732461
126	states	0.943209	0.943209	0.943209	0.943209	0.943209	0.943209	0.943209	0.943209	0.943209	0.943209	0.943209	0.943209	0.943209	0.943209	0.943209	0.943209	0.943209	0.943209	0.943209	0.943209	0.943209	0.943209	0.943209	0.943209	0.943209	0.943209	0.943209	0.943209	0.943209	0.943209	0.943209	0.943209	0.943209	0.943209	0.943209	0.943209	0.943209	0.943209	0.943209	0.943209	0.943209	0.943209	0.943209	0.943209	0.943209	0.0792861	0.0792861	0.0792861
126	clusters	0.894008	0.894008	0.894008	0.894008	0.894008	0.894008	0.894008	0.894008	0.894008	0.894008	0.894008	0.894008	0.894008	0.894008	0.894008	0.894008	0.894008	0.894008	0.894008	0.894008	0.894008	0.894008	0.894008	0.894008	0.894008	0.894008	0.894008	0.894008	0.894008	0.894008	0.894008	0.894008	0.894008	0.894008	0.894008	0.894008	0.894008	0.894008	0.894008	0.894008	0.894008	0.894008	0.894008	0.894008	0.894008	0.100676	0.100676	0.100676
127	fret	0.677791	0.824176	0.744673	0.83987	0.815243	0.75013	0.558466	0.853383	0.724024	0.780863	0.541064	0.552313	0.852255	0.75669	0.815243	0.784174	0.828652	0.732702	0.709974	0.88286	0.738138	0.8119	0.859031	0.787475	0.777556	0.810786	0.780863	0.593571	0.769853	0.703511	0.763265	0.623835	0.838746	0.655448	0.642771	0.759976	0.702435	0.763265	0.879445	0.804112	0.746855	0.656508
127	states	0.623835	0.780863	0.780863	0.780863	0.780863	0.780863	0.623835	0.780863	0.780863	0.780863	0.623835	0.623835	0.780863	0.780863	0.780863	0.780863	0.780863	0.780863	0.780863	0.780863	0.780863	0.780863	0.780863	0.780863	0.780863	0.780863	0.780863	0.623835	0.780863	0.780863	0.780863	0.623835	0.780863	0.623835	0.623835	0.780863	0.780863	0.780863	0.780863	0.780863	0.780863	0.623835
127	clusters	0.556189	0.794605	0.794605	0.794605	0.794605	0.794605	0.556189	0.794605	0.794605	0.794605	0.556189	0.556189	0.794605	0.794605	0.794605	0.794605	0.794605	0.794605	0.794605	0.794605	0.794605	0.794605	0.794605	0.794605	0.794605	0.794605	0.794605	0.556189	0.794605	0.794605	0.794605	0.556189	0.794605	0.556189	0.556189	0.794605	0.794605	0.794605	0.794605	0.794605	0.794605	0.556189
128	fret	0.972207	0.78566	0.863147	0.911111	0.952045	0.970758	0.91809	0.878056	1.00143	0.972207	0.884882	0.909719	0.848386	0.840397	0.954909	0.816686	0.901395	0.863147	0.868551	0.829811	0.98531	0.964976	0.994107	0.827177	0.905551	0.997051	0.942063	0.949187	0.913899	0.835094	0.906939	0.718208	0.839069	0.821922	0.819302	0.771659	0.986773	0.803678	0.828493	0.994107	0.856419	0.78822	0.947759	0.83113	0.767864	0.98093	0.795928	0.897249
128	states	0.893116	0.893116	0.893116	0.893116	0.893116	0.893116	0.893116	0.893116	0.893116	0.893116	0.893116	0.893116	0.893116	0.893116	0.893116	0.893116	0.893116	0.893116	0.893116	0.893116	0.893116	0.893116	0.893116	0.893116	0.893116	0.893116	0.893116	0.893116	0.893116	0.893116	0.893116	0.893116	0.893116	0.893116	0.893116	0.893116	0.893116	0.893116	0.893116	0.893116	0.893116	0.893116	0.893116	0.893116	0.893116	0.893116	0.893116	0.893116
128	clusters	0.894008	0.894008	0.894008	0.894008	0.894008	0.894008	0.894008	0.894008	0.894008	0.894008	0.894008	0.894008	0.894008	0.894008	0.894008	0.894008	0.894008	0.894008	0.894008	0.894008	0.894008	0.894008	0.894008	0.894008	0.894008	0.894008	0.894008	0.894008	0.894008	0.894008	0.894008	0.894008	0.894008	0.894008	0.894008	0.894008	0.894008	0.894008	0.894008	0.894008	0.894008	0.894008	0.894008	0.894008	0.894008	0.894008	0.894008	0.894008
129	fret	0.918122	0.884349	0.958421	0.89067	0.845483	0.903328	0.899106	0.948857	0.859116	0.853869	0.837105	0.980782	0.956295	0.944611	0.932944	0.998931	1.03106	0.936124	0.904384	0.874877	0.902272	0.845483	0.917064	0.912835	0.912835	0.891724	0.907552	0.853869	0.885402	0.953106	0.913892	0.91918	0.896996	0.92553	0.957358
129	states	0.912835	0.912835	0.912835	0.912835	0.912835	0.912835	0.912835	0.912835	0.912835	0.912835	0.912835	0.912835	0.912835	0.912835	0.912835	0.912835	0.912835	0.912835	0.912835	0.912835	0.912835	0.912835	0.912835	0.912835	0.912835	0.912835	0.912835	0.912835	0.912835	0.912835	0.912835	0.912835	0.912835	0.912835	0.912835
129	clusters	0.894008	0.894008	0.894008	0.894008	0.894008	0.894008	0.894008	0.894008	0.894008	0.894008	0.894008	0.894008	0.894008	0.894008	0.894008	0.894008	0.894008	0.894008	0.894008	0.894008	0.894008	0.894008	0.894008	0.894008	0.894008	0.894008	0.894008	0.894008	0.894008	0.894008	0.894008	0.894008	0.894008	0.894008	0.894008
130	fret	0.833168	0.938799	0.861843	0.914086	0.888419	0.853068	0.907636	0.851818	0.792792	0.929656	0.818382	0.81348	0.892246	0.846826	1.01489	0.907636	0.848073	0.923153	0.928354	0.887144	0.874451	0.896082	0.894802	0.887144	0.934875	0.985185	0.84558	0.880787	0.818382	0.868136	0.894802	0.855571	0.855571	0.880787	0.849321	0.923153	0.940109	0.82576	0.880787
130	states	0.880787	0.880787	0.880787	0.880787	0.880787	0.880787	0.880787	0.880787	0.880787	0.880787	0.880787	0.880787	0.880787	0.880787	0.880787	0.880787	0.880787	0.880787	0.880787	0.880787	0.880787	0.880787	0.880787	0.880787	0.880787	0.880787	0.880787	0.880787	0.880787	0.880787	0.880787	0.880787	0.880787	0.880787	0.880787	0.880787	0.880787	0.880787	0.880787
130	clusters	0.894008	0.894008	0.894008	0.894008	0.894008	0.894008	0.894008	0.894008	0.894008	0.894008	0.894008	0.894008	0.894008	0.894008	0.894008	0.894008	0.894008	0.894008	0.894008	0.894008	0.894008	0.894008	0.894008	0.894008	0.894008	0.894008	0.894008	0.894008	0.894008	0.894008	0.894008	0.894008	0.894008	0.894008	0.894008	0.894008	0.894008	0.894008	0.894008
131	fret	0.862488	0.900747	0.894315	0.849911	0.893032	0.82378	0.891749	0.955678	0.94377	0.92409	0.916277	0.942451	0.85242	0.836176	0.905909	0.920179	0.870077	0.83369	0.889186	0.908496	0.929318	0.862488	0.85242	0.8956	0.893032	0.8956	0.92409	0.856189	0.877696	0.882794	0.893032	0.872613	0.918878	0.903327	0.913679	0.881518	0.865014	0.862488	0.916277	0.904617	0.876424	0.917577	0.877696	0.816382	0.912382	0.900747	0.848658	0.871344
131	states	0.893032	0.893032	0.893032	0.893032	0.893032	0.893032	0.893032	0.893032	0.893032	0.893032	0.893032	0.893032	0.893032	0.893032	0.893032	0.893032	0.893032	0.893032	0.893032	0.893032	0.893032	0.893032	0.893032	0.893032	0.893032	0.893032	0.893032	0.893032	0.893032	0.893032	0.893032	0.893032	0.893032	0.893032	0.893032	0.893032	0.893032	0.893032	0.893032	0.893032	0.893032	0.893032	0.893032	0.893032	0.893032	0.893032	0.893032	0.893032
131	clusters	0.894008	0.894008	0.894008	0.894008	0.894008	0.894008	0.894008	0.894008	0.894008	0.894008	0.894008	0.894008	0.894008	0.894008	0.894008	0.894008	0.894008	0.894008	0.894008	0.894008	0.894008	0.894008	0.894008	0.894008	0.894008	0.894008	0.894008	0.894008	0.894008	0.894008	0.894008	0.894008	0.894008	0.894008	0.894008	0.894008	0.894008	0.894008	0.894008	0.894008	0.894008	0.894008	0.894008	0.894008	0.894008	0.894008	0.894008	0.894008
[truncated: 552 more columns]
