# Supplementary material for: Conformational dynamics of auto-inhibition in the ER calcium sensor STIM1
Source: eLife. 2021 Nov 3;10:e66194. doi: 10.7554/eLife.66194 (PMC8651296; doi:10.7554/eLife.66194)
Supplement: Figure 7—figure supplement 2—source data 1. [file elife-66194-fig7-figsupp2-data1.xlsx]

## Sheet: Panel A
WT-d0						WT-d4
domain 1	residue 1	domain 2	residue 2	type		domain 1	residue 1	domain 2	residue 2	type
CC1α1	238	CC2	384	inter		CC1α1	238	CC2	384	inter
CC1α1	238	CC2	386	inter		CC1α1	243	CC1α1	246	intra
CC1α1	243	CC1α1	246	intra		CC1α1	243	CC3	413	inter
CC1α1	243	CC3	413	inter		CC1α1	246	CC2	384	inter
CC1α1	246	CC2	384	inter		CC1α2	284	CC1α2	285	intra
CC1α1	246	CC3	413	inter		CC1α2	285	CC1α2	294	intra
CC1α2	284	CC1α2	285	intra		CC1α2	285	CC3	413	inter
CC1α2	285	CC1α2	294	intra		CC2	366	CC2	371	inter
CC1α2	301	CC1α3	315	inter		CC2	366	CC2	377	intra
CC1α3	330	CC1α3	333	intra		CC2	366	CC3	413	intra
CC2	366	CC2	371	inter		CC2	371	CC2	371	inter
CC2	366	CC2	377	intra		CC2	371	CC2	382	intra
CC2	366	CC3	413	intra		CC2	377	CC2	384	intra
CC2	371	CC2	382	intra		CC2	377	CC3	413	intra
CC2	377	CC2	384	intra		CC2	385	CC3	413	intra
CC2	377	CC3	413	intra
CC2	384	CC3	413	intra
CC2	385	CC3	413	intra
CC2	386	CC3	413	inter

## Sheet: Panel B
WT-d0						2LS-d4
domain 1	residue 1	domain 2	residue 2	type		domain 1	residue 1	domain 2	residue 2	type
CC1α1	238	CC2	384	inter		CC1α1	238	CC2	377	inter
CC1α1	238	CC2	386	inter		CC1α1	238	CC3	413	inter
CC1α1	242	CC2	384	inter		CC1α1	243	CC1α1	246	intra
CC1α1	242	CC2	385	inter		CC1α2	279	CC1α2	285	inter
CC1α1	242	CC2	386	inter		CC1α2	284	CC1α2	285	intra
CC1α1	243	CC3	413	inter		CC1α2	284	CC3	413	inter
CC1α2	284	CC1α2	285	intra		CC1α2	285	CC1α2	294	intra
CC1α2	301	CC1α3	315	inter		CC1α2	285	CC1α2	301	inter
CC1α3	330	CC2	371	inter		CC1α2	285	CC3	413	inter
CC2	371	CC2	371	inter		CC1α2	294	CC1α2	301	inter
CC2	371	CC2	382	intra		CC1α2	294	CC1α3	330	inter
CC2	377	CC2	384	intra		CC1α2	294	CC2	377	inter
CC2	382	CC2	386	intra		CC1α3	315	CC2	371	inter
CC2	386	CC3	408	intra		CC2	366	CC2	377	intra
						CC2	366	CC3	413	intra
						CC2	371	CC2	371	inter
						CC2	371	CC2	382	intra
						CC2	377	CC2	384	intra
						CC2	377	CC3	413	intra
						CC2	382	CC2	386	intra
						CC2	382	CC3	413	intra
						CC2	384	CC3	413	inter
						CC2	385	CC3	413	intra
						CC2	386	CC3	408	intra
						CC2	386	CC3	413	intra

## Sheet: Panel C
WT-d0						R304W-d4
domain 1	residue 1	domain 2	residue 2	type		domain 1	residue 1	domain 2	residue 2	type
CC1α1	242	CC2	386	inter		CC1α1	238	CC3	413	inter
CC1α1	243	CC3	413	inter		CC1α1	243	CC1α1	246	intra
CC1α1	246	CC2	384	inter		CC1α1	246	CC1α2	301	inter
CC1α1	246	CC3	413	inter		CC1α2	285	CC1α2	294	intra
CC1α2	267	CC1α3	315	inter		CC1α2	285	CC3	413	intra
CC1α2	279	CC1α2	285	inter		CC1α3	333	CC2	349	intra
CC1α2	279	CC2	377	inter		CC2	366	CC2	377	intra
CC1α2	284	CC1α2	285	intra		CC2	366	CC3	413	intra
CC1α2	285	CC1α2	294	intra		CC2	371	CC2	371	inter
CC1α2	301	CC1α3	315	inter		CC2	371	CC2	382	intra
CC2	366	CC2	371	inter		CC2	377	CC2	384	intra
CC2	371	CC2	371	inter		CC2	377	CC3	413	intra
CC2	371	CC2	382	intra		CC2	382	CC3	413	intra
CC2	377	CC2	384	intra		CC2	385	CC3	413	intra
CC2	384	CC3	413	inter		CC2	386	CC3	413	intra

## Sheet: Panel D
WT-d0						T307C-d4
domain 1	residue 1	domain 2	residue 2	type		domain 1	residue 1	domain 2	residue 2	type
CC1α1	238	CC2	384	inter		CC1α1	238	CC1α1	246	inter
CC1α1	238	CC2	386	inter		CC1α1	243	CC1α1	246	intra
CC1α1	243	CC1α1	246	intra		CC1α2	279	CC1α2	285	intra
CC1α1	243	CC3	413	inter		CC1α2	285	CC1α2	294	intra
CC1α1	246	CC1α3	315	inter		CC1α2	285	CC1α2	301	inter
CC1α1	246	CC2	384	inter		CC1α2	285	CC3	413	intra
CC1α1	246	CC3	413	inter		CC1α2	294	CC1α2	301	inter
CC1α2	267	CC1α3	315	inter		CC1α2	294	CC2	349	inter
CC1α2	279	CC1α2	285	intra		CC1α3	315	CC1α3	333	inter
CC1α2	285	CC1α2	294	intra		CC1α3	333	CC2	349	intra
CC1α2	301	CC1α3	315	inter		CC2	366	CC2	371	inter
CC2	366	CC2	371	inter		CC2	366	CC2	377	intra
CC2	371	CC2	371	inter		CC2	366	CC3	413	intra
CC2	371	CC2	382	intra		CC2	371	CC2	371	inter
CC2	377	CC2	384	intra		CC2	371	CC2	382	intra
CC2	382	CC2	386	intra		CC2	377	CC2	382	inter
CC2	386	CC3	408	intra		CC2	377	CC2	384	intra
						CC2	377	CC3	413	intra
						CC2	382	CC2	386	intra
						CC2	382	CC3	413	intra
						CC2	384	CC3	413	inter
						CC2	385	CC3	413	intra
						CC2	386	CC3	413	inter
